# Supplementary material
Source: Research Square preprint supplement (doi:10.21203/rs.3.rs-9869940/v1)
Supplement: Supplementary file 1 [file 066bae92119840745c7d3fde.xlsx]

## Sheet: Panel A - PTV burden
LOEUF filter	Gene set	Group/Comparison	N total	N carrier	Carrier rate	Fisher OR	Fisher P	Fisher FDR q	Firth OR	Firth 95% CI lower	Firth 95% CI upper	Firth P	Firth FDR q
LOEUF < 0.6 (primary)	ASD risk genes (Fu et al.)	Controls	8442	204	0.0242
LOEUF < 0.6 (primary)	ASD risk genes (Fu et al.)	ASD	508	29	0.0571
LOEUF < 0.6 (primary)	ASD risk genes (Fu et al.)	SZ	634	28	0.0442
LOEUF < 0.6 (primary)	ASD risk genes (Fu et al.)	ASD vs Controls				2.48	6.75e-05	0.000202	2.67	1.78	4	2.02e-06	6.06e-06
LOEUF < 0.6 (primary)	ASD risk genes (Fu et al.)	SZ vs Controls				1.89	0.004	0.004	1.94	1.3	2.91	0.001	0.001
LOEUF < 0.6 (primary)	SZ risk genes (Chick et al.)	Controls	8442	16	0.0019
LOEUF < 0.6 (primary)	SZ risk genes (Chick et al.)	ASD	508	2	0.0039
LOEUF < 0.6 (primary)	SZ risk genes (Chick et al.)	SZ	634	10	0.0158
LOEUF < 0.6 (primary)	SZ risk genes (Chick et al.)	ASD vs Controls				2.52	0.272	0.272	3.03	0.76	12.16	0.118	0.118
LOEUF < 0.6 (primary)	SZ risk genes (Chick et al.)	SZ vs Controls				8.59	4.91e-06	1.47e-05	8.75	3.92	19.57	1.24e-07	3.72e-07
LOEUF < 0.6 (primary)	NDD genes (Fu et al.)	Controls	8442	578	0.0685
LOEUF < 0.6 (primary)	NDD genes (Fu et al.)	ASD	508	52	0.1024
LOEUF < 0.6 (primary)	NDD genes (Fu et al.)	SZ	634	68	0.1073
LOEUF < 0.6 (primary)	NDD genes (Fu et al.)	ASD vs Controls				1.56	0.005	0.008	1.62	1.2	2.18	0.002	0.003
LOEUF < 0.6 (primary)	NDD genes (Fu et al.)	SZ vs Controls				1.64	0.000537	0.000806	1.67	1.28	2.18	0.000138	0.000208
LOEUF < 0.35 (stringent)	ASD risk genes (Fu et al.)	Controls	8442	133	0.0158
LOEUF < 0.35 (stringent)	ASD risk genes (Fu et al.)	ASD	508	22	0.0433
LOEUF < 0.35 (stringent)	ASD risk genes (Fu et al.)	SZ	634	19	0.03
LOEUF < 0.35 (stringent)	ASD risk genes (Fu et al.)	ASD vs Controls				2.88	5.93e-05	0.000178	3.15	1.97	5.03	1.51e-06	4.53e-06
LOEUF < 0.35 (stringent)	ASD risk genes (Fu et al.)	SZ vs Controls				1.97	0.014	0.014	2.03	1.25	3.29	0.004	0.004
LOEUF < 0.35 (stringent)	SZ risk genes (Chick et al.)	Controls	8442	10	0.0012
LOEUF < 0.35 (stringent)	SZ risk genes (Chick et al.)	ASD	508	2	0.0039
LOEUF < 0.35 (stringent)	SZ risk genes (Chick et al.)	SZ	634	9	0.0142
LOEUF < 0.35 (stringent)	SZ risk genes (Chick et al.)	ASD vs Controls				3.96	0.146	0.146	3.99	0.92	17.19	0.064	0.064
LOEUF < 0.35 (stringent)	SZ risk genes (Chick et al.)	SZ vs Controls				12.2	1.83e-06	5.5e-06	11.62	4.67	28.93	1.35e-07	4.05e-07
LOEUF < 0.35 (stringent)	NDD genes (Fu et al.)	Controls	8442	386	0.0457
LOEUF < 0.35 (stringent)	NDD genes (Fu et al.)	ASD	508	41	0.0807
LOEUF < 0.35 (stringent)	NDD genes (Fu et al.)	SZ	634	46	0.0726
LOEUF < 0.35 (stringent)	NDD genes (Fu et al.)	ASD vs Controls				1.85	0.000814	0.001	1.96	1.39	2.74	0.000103	0.000155
LOEUF < 0.35 (stringent)	NDD genes (Fu et al.)	SZ vs Controls				1.65	0.004	0.005	1.68	1.22	2.3	0.001	0.002
No restriction	ASD risk genes (Fu et al.)	Controls	8442	583	0.0691
No restriction	ASD risk genes (Fu et al.)	ASD	508	52	0.1024
No restriction	ASD risk genes (Fu et al.)	SZ	634	56	0.0883
No restriction	ASD risk genes (Fu et al.)	ASD vs Controls				1.55	0.007	0.022	1.59	1.18	2.15	0.002	0.007
No restriction	ASD risk genes (Fu et al.)	SZ vs Controls				1.32	0.076	0.076	1.35	1.02	1.8	0.038	0.038
No restriction	SZ risk genes (Chick et al.)	Controls	8442	55	0.0065
No restriction	SZ risk genes (Chick et al.)	ASD	508	7	0.0138
No restriction	SZ risk genes (Chick et al.)	SZ	634	16	0.0252
No restriction	SZ risk genes (Chick et al.)	ASD vs Controls				2.26	0.087	0.087	2.42	1.11	5.31	0.027	0.027
No restriction	SZ risk genes (Chick et al.)	SZ vs Controls				4.03	2.28e-05	6.84e-05	4.2	2.39	7.39	6.37e-07	1.91e-06
No restriction	NDD genes (Fu et al.)	Controls	8442	1179	0.1397
No restriction	NDD genes (Fu et al.)	ASD	508	88	0.1732
No restriction	NDD genes (Fu et al.)	SZ	634	110	0.1735
No restriction	NDD genes (Fu et al.)	ASD vs Controls				1.3	0.042	0.063	1.32	1.04	1.68	0.021	0.027
No restriction	NDD genes (Fu et al.)	SZ vs Controls				1.3	0.021	0.032	1.32	1.07	1.64	0.011	0.016

## Sheet: Panel B - CNV burden
CNV type	Gene set / Category	Group/Comparison	N total	N carrier	Carrier rate	Fisher OR	Fisher P	Fisher FDR q	Firth OR	Firth 95% CI lower	Firth 95% CI upper	Firth P	Firth FDR q
Rare exonic risk-gene DEL	ASD risk genes (Fu et al.)	Controls	8372	12	0.0014
Rare exonic risk-gene DEL	ASD risk genes (Fu et al.)	ASD	505	4	0.0079
Rare exonic risk-gene DEL	ASD risk genes (Fu et al.)	SZ	627	1	0.0016
Rare exonic risk-gene DEL	ASD risk genes (Fu et al.)	ASD vs Controls				6	0.011	0.016	7.6	2.4	24	0.000551	0.000826
Rare exonic risk-gene DEL	ASD risk genes (Fu et al.)	SZ vs Controls				1.6	0.609	0.609	1.72	0.29	10.08	0.549	0.549
Rare exonic risk-gene DEL	SZ risk genes (Chick et al.)	Controls	8372	32	0.0038
Rare exonic risk-gene DEL	SZ risk genes (Chick et al.)	ASD	505	2	0.004
Rare exonic risk-gene DEL	SZ risk genes (Chick et al.)	SZ	627	5	0.008
Rare exonic risk-gene DEL	SZ risk genes (Chick et al.)	ASD vs Controls				1.27	0.72	0.72	1.47	0.39	5.53	0.567	0.567
Rare exonic risk-gene DEL	SZ risk genes (Chick et al.)	SZ vs Controls				2.27	0.18	0.271	2.44	0.97	6.16	0.059	0.089
Rare exonic risk-gene DEL	NDD genes (Fu et al.)	Controls	8372	43	0.0051
Rare exonic risk-gene DEL	NDD genes (Fu et al.)	ASD	505	10	0.0198
Rare exonic risk-gene DEL	NDD genes (Fu et al.)	SZ	627	7	0.0112
Rare exonic risk-gene DEL	NDD genes (Fu et al.)	ASD vs Controls				4.06	0.000691	0.002	4.16	2.06	8.42	7.21e-05	0.000216
Rare exonic risk-gene DEL	NDD genes (Fu et al.)	SZ vs Controls				2.31	0.083	0.25	2.49	1.13	5.48	0.024	0.072
NAHR-mediated genomic disorder	All genomic disorders	Controls	8372	123	0.0147
NAHR-mediated genomic disorder	All genomic disorders	ASD	505	18	0.0356
NAHR-mediated genomic disorder	All genomic disorders	SZ	627	28	0.0447
NAHR-mediated genomic disorder	All genomic disorders	ASD vs Controls				2.53	0.001	0.004	2.46	1.48	4.08	0.000511	0.001
NAHR-mediated genomic disorder	All genomic disorders	SZ vs Controls				3.18	1.46e-06	2e-06	3.19	2.1	4.85	5.98e-08	8.97e-08
NAHR-mediated genomic disorder	ASD-associated GD	Controls	8372	103	0.0123
NAHR-mediated genomic disorder	ASD-associated GD	ASD	505	15	0.0297
NAHR-mediated genomic disorder	ASD-associated GD	SZ	627	25	0.0399
NAHR-mediated genomic disorder	ASD-associated GD	ASD vs Controls				2.52	0.004	0.004	2.45	1.41	4.26	0.002	0.002
NAHR-mediated genomic disorder	ASD-associated GD	SZ vs Controls				3.38	2e-06	2e-06	3.34	2.14	5.22	1.11e-07	1.11e-07
NAHR-mediated genomic disorder	SZ-associated GD	Controls	8372	20	0.0024
NAHR-mediated genomic disorder	SZ-associated GD	ASD	505	6	0.0119
NAHR-mediated genomic disorder	SZ-associated GD	SZ	627	17	0.0271
NAHR-mediated genomic disorder	SZ-associated GD	ASD vs Controls				5.3	0.003	0.004	5	1.97	12.73	0.000726	0.001
NAHR-mediated genomic disorder	SZ-associated GD	SZ vs Controls				11.68	7.42e-11	2.22e-10	10.73	5.57	20.7	1.42e-12	4.26e-12

## Sheet: Panel C - De novo burden
Filter	Gene set	Group/Comparison	N total	N carrier	Carrier rate	Fisher OR	Fisher P	Fisher FDR q	Firth OR	Firth 95% CI lower	Firth 95% CI upper	Firth P	Firth FDR q	Note
No pathogenicity score (primary)	ASD risk genes (Fu et al.)	ASD	376	14	0.0372
No pathogenicity score (primary)	ASD risk genes (Fu et al.)	SZ	293	5	0.0171
No pathogenicity score (primary)	ASD risk genes (Fu et al.)	ASD vs SZ				2.1	0.159	0.313	2.3	0.81	6.57	0.119	0.149
No pathogenicity score (primary)	SZ risk genes (Chick et al.)	ASD	376	5	0.0133
No pathogenicity score (primary)	SZ risk genes (Chick et al.)	SZ	293	3	0.0102
No pathogenicity score (primary)	SZ risk genes (Chick et al.)	ASD vs SZ				1.23	1	1						Firth skipped (low carriers)
No pathogenicity score (primary)	NDD genes (Fu et al.)	ASD	376	37	0.0984
No pathogenicity score (primary)	NDD genes (Fu et al.)	SZ	293	20	0.0683
No pathogenicity score (primary)	NDD genes (Fu et al.)	ASD vs SZ				1.47	0.209	0.313	1.54	0.86	2.78	0.149	0.149
With pathogenicity score (sensitivity)	ASD risk genes (Fu et al.)	ASD	376	9	0.0239
With pathogenicity score (sensitivity)	ASD risk genes (Fu et al.)	SZ	293	3	0.0102
With pathogenicity score (sensitivity)	ASD risk genes (Fu et al.)	ASD vs SZ				2.15	0.245	0.324	2.71	0.71	10.26	0.143	0.143
With pathogenicity score (sensitivity)	SZ risk genes (Chick et al.)	ASD	376	1	0.0027
With pathogenicity score (sensitivity)	SZ risk genes (Chick et al.)	SZ	293	3	0.0102
With pathogenicity score (sensitivity)	SZ risk genes (Chick et al.)	ASD vs SZ				0.33	0.324	0.324						Firth skipped (low carriers)
With pathogenicity score (sensitivity)	NDD genes (Fu et al.)	ASD	376	21	0.0559
With pathogenicity score (sensitivity)	NDD genes (Fu et al.)	SZ	293	9	0.0307
With pathogenicity score (sensitivity)	NDD genes (Fu et al.)	ASD vs SZ				1.81	0.135	0.324	2.11	0.92	4.8	0.077	0.143
