# Supplementary material
Source: Research Square preprint supplement (doi:10.21203/rs.3.rs-9869940/v1)
Supplement: Supplementary file 1 [file 195acb88661f5a63132a6e69.docx]

**Supplementary Information**

**Supplementary Methods**

**Table of Contents**

1. Study design and analytic overview

2. Study participants, recruitment and ethics

2.1. Case cohorts

2.2. Control cohort

2.3. Ethics

3. Whole-genome sequencing, alignment and variant calling

3.1. Library preparation and sequencing

3.1.1. Sequencing technical quality metrics

3.2. Alignment and SNV/indel joint calling

3.3. CNV detection and annotation

3.3.1. CNV detection, segmentation and calling (CNVkit)

3.3.2. CNV post-processing and minimum size

3.3.3. Functional annotation (AnnotSV)

3.3.4. CNV validation against array CGH

4. Sample quality control and population stratification

4.1. Variant selection for principal component analysis

4.2. Family-based representative selection

4.3. Cryptic relatedness pruning

4.4. Linkage disequilibrium pruning

4.5. Global PCA and East Asian classification

4.6. Japanese ancestry verification

4.7. Japanese-specific principal components

4.8. Analysis-specific sample definitions

5. Gene sets and transcript harmonization

6. De novo variant calling and quality control

7. Rare variant burden analyses

7.1. Rare PTV burden analysis

7.2. Rare CNV burden analysis

8. Genic-proximal TRE outlier burden analysis

8.1. Overview and rationale

8.2. Sample lists and pedigree control

8.3. Depth estimation

8.4. EHdn pipeline

8.4.1. EHdn profiling and genic restriction

8.4.2. Depth normalization and merged locus table

8.4.3. Motif canonicalization and locus clustering

8.4.4. High-specificity filters

8.4.5. Cross-fitted outlier and rare-cluster definition

8.4.6. Association models

8.5. STRling pipeline

8.5.1. Genome-wide discovery and construction of a fixed genic in-bounds panel

8.5.2. STRling call and enforcement of in-bounds genotypes

8.5.3. Outlier calling (STRling-outliers)

8.5.4. Cross-fitted rare-outlier burden definition and models

8.5.5. Cross-caller concordance assessment

8.6. Long-read support assessment of rare TRE outlier loci

9. Integrated TADA-based gene discovery for ASD

10. Cross-ancestry meta-analysis of rare coding variants for schizophrenia gene discovery

11. Polygenic risk score (PRS) analysis

11.1. Summary statistics preprocessing and coordinate harmonization

11.2. Target genotype QC and rsID harmonization

11.3. PRS-CSx inference and MHC exclusion

11.4. PRS evaluation and pedigree handling

12. Cell-type-resolved TAD-boundary SV-burden analysis

12.1. 3D genome atlas and cell-type-specific boundary definition

12.2. SV annotation, filtering, and NAHR exclusion

12.3. Association model specification

12.4. Multiple-testing correction

12.5. Matched-static specificity analysis

12.6. Boundary-type specificity analysis (Diff_any vs. Static per-bin)

12.7. ASD-vs-SZ heterogeneity analysis

12.8. Replication in independent ASD cohorts

12.9. Sensitivity analyses: Pattern B and Pattern C

12.10. Exploratory locus illustration

12.11. Aggregate exon-exclusion sensitivity analyses

12.12. Diff_any-bounded TAD-scale regulatory-domain constraint-enrichment analysis

12.13. Joint-layer logistic regression integrating WGS-enabled and established genetic risk layers

12.14. Halvorsen 40-kb TAD-boundary comparator using parallel adult and foetal cortical boundary

analyses

13. Statistical inference, multiple testing and reporting conventions

14. Software and resources

15. Use of large language models

**1. Study design and analytic overview**

We conducted a harmonized whole-genome sequencing (WGS) analysis in Japanese cohorts to compare autism spectrum disorder (ASD) and schizophrenia (SZ) across multiple variant classes within a harmonized short-read WGS generation and unified downstream processing/control framework. The primary WGS-enabled findings centre on (i) shared rare genic-proximal tandem-repeat expansion (TRE) outlier burden and (ii) ASD-preferential rare deletion burden at developmental cell-type-differential topologically associating domain (TAD)-boundary annotations using a single-cell developmental brain atlas1-3. These findings are supported by contextual reference layers: rare damaging coding variant and copy-number variant (CNV) burden analysis, and contextual evaluation of cross-ancestry polygenic risk score (PRS) portability. An external integration layer (TADA-based gene discovery) places the WGS findings in a broader rare-variant context. A joint-layer modelling analysis additionally integrates the primary TRE and TAD signals with rare coding, CNV, non-allelic homologous recombination (NAHR)-CNV and PRS layers as a sensitivity analysis assessing whether the TAD signal is retained after accounting for established genetic risk layers.

Across modules, we used consistent covariate adjustment for sex and ancestry principal components (PC1–PC10) where applicable and embedded robustness checks directly in the inferential pipeline: (a) cross-fitting for outlier/rareness definitions in TRE analyses, and (b) matched-static resampling, external Diff_any vs. Static per-bin specificity testing, two-test exon-exclusion analysis and ASD-vs-SZ heterogeneity testing for TAD-boundary structural variant (SV)-burden analyses.

Because each variant class imposes distinct requirements (e.g. family structure handling, depth availability, genotype quality control [QC]), we constructed module-specific analysis subsets while preserving a consistent phenotype labelling and covariate framework. Sample sizes for each module correspond to those reported in the Results.

**2. Study participants, recruitment and ethics**

**2.1. Case cohorts**

We analysed WGS data from Japanese individuals diagnosed with ASD (n = 597) or SZ (n = 762) and recruited at Nagoya University Hospital and collaborating institutions across nationwide psychiatric and neurodevelopmental research networks in Japan4. The SZ cohort additionally included participants from the Japanese Schizophrenia Sib-Pair Linkage Group5. ASD was diagnosed by experienced child psychiatrists according to Diagnostic and Statistical Manual of Mental Disorders, fifth edition (DSM-5) criteria, based on comprehensive clinical assessments, including detailed developmental history. In a subset of participants, standardized diagnostic instruments such as the Autism Diagnostic Interview–Revised and/or the Autism Diagnostic Observation Schedule were additionally used to support the clinical diagnosis. SZ was diagnosed by experienced psychiatrists according to DSM-5 criteria. For a subset of participants, diagnoses were corroborated using the Structured Clinical Interview for DSM. The demographic characteristics of all participants are summarized in **Table 1**. For family-based analyses, we included available trio families (proband plus both parents; ASD: 436 probands from 392 families; SZ: 324 probands from 302 families), enabling identification of de novo variants and inherited-variant sensitivity analyses.

**2.2. Control cohort**

Population-based controls (n = 8,610) were derived from the National Center Biobank Network (NCBN), a nationwide consortium coordinating biobanks across six National Centers for Advanced and Specialized Medical Research in Japan6, 7. NCBN participants comprise individuals with a broad range of medical conditions ascertained at participating national centres; for the present study, they serve as population-based controls without documented psychiatric diagnoses. Controls were generated using the same PCR-free library-preparation strategy, paired-end read design and harmonized downstream processing workflow as the case cohorts (see 3.1. Library preparation and sequencing). Controls were curated for psychiatric genetics applications by excluding individuals whose primary 10th revision of the International Classification of Diseases code was classified as F00–F99 (mental and behavioural disorders) or Q00–Q99 (congenital malformations and chromosomal abnormalities), based on available medical records and questionnaires.

**2.3. Ethics**

Recruitment and genetic analysis of case participants and their family members were approved by the ethics committees of Nagoya University (approval number 2010-1033) and collaborating institutions. Written informed consent was obtained from all participants and/or their legal guardians in accordance with local regulations. The use of NCBN biobank samples for genomic research was approved by the ethics review committee of the National Center for Global Health and Medicine (approval number NCGM-S-003413-06), and written informed consent was obtained from all NCBN participants at each contributing biobank7.

**3. Whole-genome sequencing, alignment and variant calling**

**3.1. Library preparation and sequencing**

All case, family and control samples were generated using the same PCR-free library-preparation strategy and paired-end 150-bp Illumina short-read WGS design, followed by a harmonized downstream alignment, variant-calling and QC workflow to support comparable data quality across cohorts. Genomic DNA (≥4 μg at ≥80 ng/μL) was sheared to approximately 550 bp fragments using a Covaris ultrasonicator. Sequencing libraries were constructed using the TruSeq DNA PCR-Free HT Library Preparation Kit (Illumina) with IDT for Illumina UD Indexes on an automated liquid-handling system in 96-well format. Library quality was verified on a MiSeq or iSeq instrument, confirming insert sizes of 400–750 bp and concentrations of ≥2.1 nM. Production sequencing was performed on Illumina NovaSeq 6000 and NovaSeq X Plus instruments with paired-end 150-bp reads, targeting ≥90 Gbp of non-duplicate sequence data per sample with a minimum Q30 fraction of 75%.

**3.1.1. Sequencing technical quality metrics**

Sequencing-quality metrics were summarized across diagnostic groups and sequenced relatives (Supplementary Table 13). After harmonized PCR-free WGS generation and unified upstream processing, core sequencing-quality metrics, including mapping rate, bases ≥Q30, mean autosomal depth and genome coverage at ≥20×, were broadly comparable across ASD probands, SZ probands, Controls and sequenced relatives. Modest systematic differences in duplicate rate and insert-size distribution were observed between NCBN Controls and the disorder cohorts, consistent with library-preparation batch structure. These differences were modest relative to overall sequencing depth and mapping/base-quality metrics and did not suggest a major imbalance in mapping accuracy, base quality or coverage at the sequencing depth used in this study. Association analyses used module-specific covariate frameworks as described in the corresponding sections: TRE outlier burden models additionally adjusted for sequencing depth; TAD-boundary analyses used the B′ covariate framework including SV-type-specific total span and gene-overlap burden; rare protein-truncating variant (PTV), exonic CNV and NAHR-CNV analyses used Firth logistic regression with sex and PC1–PC10; and joint-layer integrative analyses additionally included sequencing depth for TRE-layer compatibility.

**3.2. Alignment and SNV/indel joint calling**

Per-sample read alignment and variant discovery were performed using NVIDIA Clara Parabricks (v4.3.1), a GPU-accelerated implementation of the GATK Best Practices pipeline. Reads were aligned to the GRCh38 human reference genome (Homo_sapiens_assembly38.fasta) using a Parabricks fq2bam module (BWA-MEM algorithm), followed by duplicate read marking and per-sample single-nucleotide variant (SNV)/insertion/deletion (indel) calling with a Parabricks HaplotypeCaller module in genomic variant call format (GVCF) mode. All samples were then jointly genotyped using the Sentieon DNAseq (v202308.03) GVCFtyper algorithm to produce a multi-sample variant call format. Variant Quality Score Recalibration (VQSR) was performed separately for single-nucleotide polymorphisms (SNPs) and indels using Sentieon’s VarCal and ApplyVarCal algorithms. For SNP recalibration, training resources included HapMap 3.3, 1000 Genomes Omni 2.5, 1000 Genomes Phase 1 high-confidence SNPs and dbSNP build 151. For indel recalibration, Mills and 1000G gold-standard indels, Axiom Exome Plus polymorphic sites and dbSNP build 151 were used as training resources. Variants passing VQSR at a truth sensitivity threshold of 99.7% for SNPs and 99.7% for indels were retained for downstream analyses.

**3.3. CNV detection and annotation**

**3.3.1. CNV detection, segmentation and calling (CNVkit)**

CNVs were detected from WGS using CNVkit (v0.9.9) in whole-genome mode8. For each sample, CNVkit computed genome-wide copy-ratio profiles from read depth using a population reference panel constructed from NCBN WGS control data (JPT.reference.cnn). Segmentation used circular binary segmentation with smoothing and a segmentation significance threshold t = 0.1. Segment-level confidence intervals were computed using bootstrap smoothing, and copy-number states were assigned using CNVkit call with a four-tier log2-ratio threshold scheme (t3: –1.1, –0.85, 0.5, 0.7). For downstream processing, the no_ci_filter call set (call.no_ci_filter.0.1.t3.cns) was used as the primary call set, retaining confidence-interval-filtered calls for QC comparison.

**3.3.2. CNV post-processing and minimum size**

To reduce fragmentation and simplify downstream overlap operations, per-sample CNVs were merged within sample using an interval-based approach allowing small gaps (≤100 kb) while preventing inappropriate long-gap merges by requiring that the merged length exceed twice the inferred gap length. Analyses were restricted to autosomal CNVs and used a minimum CNV length filter of 25 kb to reduce noise and improve tractability.

**3.3.3. Functional annotation (AnnotSV)**

Merged CNVs were annotated using AnnotSV (v3.2.2) in full annotation mode (GRCh38)9. CNV calls were provided to AnnotSV in Browser Extensible Data (BED) format with explicit CNV type and sample identifier columns, and chromosome-wise annotation was run in parallel and merged into a single autosomal annotation table. For cohort-level filtering, we used only AnnotSV rows corresponding to Annotation_mode==full to avoid gene-split redundancies in frequency estimation.

**3.3.4. CNV validation against array CGH**

To assess the accuracy of CNVkit-derived CNV calls, we performed an orthogonal validation against array comparative genomic hybridization (array CGH) data. A subset of 297 individuals had been independently genotyped on the NimbleGen array CGH platform at Nagoya University, providing an external reference for concordance analysis.

From the WGS-derived autosomal CNV set (≥25 kb), we applied quality filters matching the gene-based rare CNV burden analyses prior to concordance evaluation: (i) exclusion of high-burden outlier samples (top 1% by per-sample CNV count); (ii) removal of common CNV sites (population frequency ≥1%) using one-directional overlap ≥30%; (iii) exclusion of CNVs within the Human Leukocyte Antigen (HLA)/Major Histocompatibility Complex (MHC) region (chr6: 28,477,797–33,448,354); and (iv) exclusion of CNVs with ≥50% segmental-duplication coverage, computed as the fraction of the CNV interval overlapping merged segmental-duplication annotations (GRCh38).

Because the WGS calls were generated on GRCh38 (hg38) and the array CGH data were originally reported on NCBI36 (hg18), coordinate harmonization was required. WGS CNV coordinates were converted from hg38 to hg18 using the UCSC liftOver tool (minMatch = 0.5) with the hg38ToHg18.over.chain file. CNVs that failed liftOver conversion were excluded from the concordance denominator, yielding 740 evaluable CNVs (376 deletions, 364 duplications) in the NimbleGen subset.

Concordance was assessed per sample by requiring both type matching (deletion–deletion or duplication–duplication) and a reciprocal overlap ≥50%, defined as min(overlap / WGS CNV length, overlap / array CGH CNV length) ≥0.5. WGS-to-array CGH concordance was computed as the proportion of WGS CNVs supported by at least one matching array CGH call in the same individual.

Overall, 89.1% (659/740) of WGS CNVs were concordant with array CGH calls, with similar rates for deletions (88.8%) and duplications (89.3%). Concordance was size-dependent, increasing from 80.6% for 25–50 kb CNVs to 95.4% for 100–500 kb CNVs and 100% for 500 kb–1 Mb CNVs. Deletions ≥50 kb reached 93.3%–100% concordance, while duplications ≥50 kb reached 92.2%–100%. The modest reduction in concordance for the smallest size category (25–50 kb: deletions 82.2%, duplications 78.7%) likely reflects the limited resolution of array CGH probe density for sub-50-kb events. Full size-stratified concordance results are provided in Supplementary Table 12.

**4. Sample quality control and population stratification**

Case–control analyses in this study required participants to be of verified Japanese ancestry, genetically independent within the analytic comparison and accompanied by sex and ancestry PCs (PC1–PC10) for covariate adjustment. We therefore constructed pedigree-aware, relatedness-pruned Japanese-ancestry case–control subsets as the foundation for TRE, rare PTV, PRS, rare CNV and three-dimensional (3D) TAD-boundary analyses. Family-based de novo analyses were defined separately from case–control analyses and used trio-specific inclusion criteria, with inference performed within families rather than through unrelated case–control comparisons. This section describes the unified sample selection and ancestry characterization pipeline; analysis-specific sample definitions are described below and in the corresponding Methods sections.

**4.1. Variant selection for principal component analysis.** To obtain a set of common, high-quality autosomal SNVs suitable for ancestry inference and relatedness estimation, we applied the following filters to the merged genotype data (study cohort plus 1000 Genomes Project phase 3 reference samples) using PLINK2 (v2.00a6): restriction to autosomes (chromosomes 1–22), biallelic SNVs with standard nucleotide alleles only (A/C/G/T), genotype missingness per variant < 5% (--geno 0.05), individual-level missingness < 5% (--mind 0.05) and minor allele frequency ≥ 1% (--maf 0.01). Duplicate-position variants (identical chromosome and base-pair coordinate) were removed to avoid analytical artefacts. These filters are intended to select informative markers for population structure analysis and do not constitute the variant-level QC applied to rare variant or de novo mutation calls, which is described in the respective sections below.

**4.2. Family-based representative selection.** Because our cohort includes multiplex families and parent–offspring trios, multiple genetically related individuals may be present for the same pedigree. To ensure independence prior to relatedness estimation and principal component analysis (PCA), we selected one representative per documented family using a deterministic priority rule: 1) the proband was preferred; 2) among multiple probands, individuals with a case diagnosis (ASD or SZ) were preferred; and 3) remaining ties were broken by lexicographic order of the sample identifier for reproducibility. Individuals with no documented family membership were retained unconditionally. In addition, the 1000 Genomes reference samples were retained in full. This step reduced the cohort from 15,197 to 13,611 QC-passing individuals.

**4.3. Cryptic relatedness pruning.** To remove residual cryptic relatedness not captured by documented pedigree information, we applied KING kinship-based pruning implemented in PLINK2 (--king-cut-off 0.0442), corresponding to a third-degree relatedness threshold. Starting from the pedigree-deduplicated set, PLINK2’s greedy algorithm iteratively removed one member of each pair exceeding this threshold, preferentially retaining individuals listed in the pedigree-preferred set. This step yielded 13,153 unrelated individuals.

**4.4. Linkage disequilibrium pruning.** To reduce redundancy among markers for PCA, we performed linkage disequilibrium (LD) pruning on the unrelated sample set using a sliding window of 500 kb, a step size of 50 variants and a pairwise r² threshold of 0.1 (PLINK2 --indep-pairwise 500 50 0.1), yielding 298,416 LD-independent variants.

**4.5. Global PCA and East Asian classification.** We computed 20 PCs on the LD-pruned, unrelated sample set (study cohort combined with the 1000 Genomes reference samples) using PLINK2 (--pca 20 approx). To classify each individual’s continental ancestry, we trained a K-nearest neighbours (KNN) classifier (k = 15, distance-weighted) on the first six PCs of the 1000 Genomes reference samples, with the binary label indicating East Asian (EAS) super-population membership. This classifier was applied to all study cohort individuals to assign an East Asian ancestry prediction.

**4.6. Japanese ancestry verification.** Among individuals classified as East Asian, we further verified Japanese ancestry using a Mahalanobis distance approach. The mean and covariance of the first two global PCs were estimated from the 1000 Genomes JPT (Japanese in Tokyo) reference samples. For each East Asian-classified cohort individual, we computed the squared Mahalanobis distance from the JPT centroid and compared it against a chi-square threshold (χ² = 9.21, corresponding to p = 0.01 with 2 degrees of freedom). Individuals whose Mahalanobis distance fell within this threshold were classified as “Japanese-like” and retained for all subsequent analyses. This two-stage classification (continental KNN followed by population-specific Mahalanobis distance) identified 10,400 Japanese-like cohort individuals, while 281 East Asian individuals who did not meet the Japanese-like criterion and 19 non-East Asian individuals were excluded.

**4.7. Japanese-specific principal components.** To generate ancestry PCs optimized for within-Japanese population structure, we repeated PCA on the Japanese-like unrelated subset alone (n = 10,400 cohort individuals plus Japanese 1000 Genomes reference samples). Twenty PCs were computed using PLINK2 (--pca 20 approx). The resulting PC1–PC10 were used as covariates in all case–control association analyses to adjust for residual population stratification within the Japanese population.

**4.8. Analysis-specific sample definitions.** The sample set and relatedness handling described above served as the foundation for case–control analyses, but individual modules applied additional inclusion criteria suited to their design. The primary case–control subset used for TRE burden, rare PTV burden and PRS analyses comprised Japanese-ancestry, pedigree-aware and relatedness-pruned individuals with complete sex and PC1–PC10 covariates (ASD n = 508; SZ n = 634; Controls n = 8,442). TRE burden models additionally used sequencing depth as a covariate.

Rare CNV burden and TAD-boundary SV-burden analyses used the corresponding CNV/TAD case–control subset after exclusion of high-burden CNV outlier samples (ASD n = 505; SZ n = 627; controls n = 8,372). Module-specific CNV/SV call filters, including common-site masking, segmental-duplication and exclusion-region filters, NAHR handling and boundary-overlap criteria where applicable, are described in Sections 7.2 and 12.2.

Trio-based de novo analyses were defined separately from the case–control subsets and required an affected proband with both biological parents sequenced. Parents were used only for family-internal de novo and inheritance assignment and were not included as case–control observations. For de novo carrier-rate comparisons, one proband per family was retained where appropriate after trio-level call-quality and ancestry QC. PRS analyses used the same primary case–control subset as the TRE and rare PTV analyses, with disorder-specific comparisons against the shared control set. Module-specific criteria are detailed in the respective Methods sections.

**5. Gene sets and transcript harmonization**

To minimize circularity in burden tests, we evaluated rare-variant burden within pre-specified neuropsychiatric risk-gene sets anchored to external discovery resources. Three gene sets were used: ASD risk genes defined in a large rare-variant meta-analytic framework (185 genes)10, SZ risk genes identified through large-scale exome sequencing (28 genes at false discovery rate [FDR] < 0.05)11 and a broader neurodevelopmental disorder (NDD) gene set (664 genes)10. After removing overlapping entries, these three sets were used for burden testing.

To ensure interpretability and isoform consistency across all variant-to-gene mapping, transcript harmonization was performed using MANE Select (v3) transcripts12. Gene constraint was quantified using the loss-of-function observed/expected upper bound fraction (LOEUF) from the Genome Aggregation Database (gnomAD) v2.1.1 and used to define dosage-sensitive gene strata for PTV burden analyses13.

**6. De novo variant calling and quality control**

De novo SNVs and indels were identified in trio families (probands with both parents sequenced) using genotype-likelihood-based calling with bcftools trio-dnm2. Because matched de novo callsets from unaffected controls were not available within this cohort, de novo results were treated as a descriptive high-priority catalogue rather than being used for formal case–control burden testing. To construct this catalogue, we applied multi-layered quality filters designed to remove technical artefacts while retaining true de novo events.

Site-level quality was assessed using Fisher strand bias (FS < 20) and mapping quality rank-sum test (MQRankSum ≥ –2) when available; variants lacking these annotations were permitted to pass. At the genotype level, we required a minimum alternate allele read count of 5 (ALT ≥ 5) and applied depth and allele-balance thresholds with sex-aware rules for chromosome X. Rarity was enforced by excluding variants with gnomAD genome AF ≥ 0.001. All variants were required to have MANE Select transcript12 support, and functional annotation was restricted to genes contained in at least one of the pre-specified neuropsychiatric risk-gene sets to focus the catalogue on biologically interpretable events.

Two complementary definitions of qualifying missense variants were evaluated. In the primary definition (‘no-score’), missense variants were included based on functional annotation alone without additional in silico score filtering. In the sensitivity definition (‘with-score’), missense variants were additionally required to exceed at least one stringent computational predictor threshold: AlphaMissense ≥ 0.906, REVEL ≥ 0.773, VARITY_R ≥ 0.842 or ESM1b ≤ –12.1. PTVs were retained under both definitions. ASD-vs-SZ differences in de novo carrier status across gene sets were evaluated using Fisher’s exact test as the primary analysis and Firth bias-reduced logistic regression adjusted for sex and PC1–PC10 as a sensitivity reference14, 15.

**7. Rare variant burden analyses**

**7.1. Rare PTV burden analysis**

Rare PTVs were defined as variants annotated with canonical loss-of-function consequences: stop-gained, frameshift, splice donor and splice acceptor variants. All PTV annotations were required to be supported by MANE Select transcripts12. Rarity was enforced at gnomAD genome allele frequency (AF) < 0.001, using the primary gnomAD genome AF field with fallback to maximum AF fields where necessary. Genotype-level QC required sequencing depth ≥ 10 (DP ≥ 10), alternate allele read count ≥ 5 (ALT ≥ 5), and variant allele fraction ≥ 0.25 (VAF ≥ 0.25). Site-level quality was assessed using Fisher strand bias (FS < 20) and the mapping quality rank-sum test (MQRankSum ≥ –2) when annotations were available; variants lacking these site-level metrics were permitted to pass. To reduce the inclusion of likely benign late truncations, stop-gained and frameshift variants in the final annotated exon were excluded; splice variants were not subject to this C-terminal exclusion rule.

The primary PTV analysis restricted variants to dosage-sensitive genes defined by LOEUF < 0.613, with sensitivity analyses using no LOEUF restriction and a stricter threshold of LOEUF < 0.35. Carrier status was defined per individual as the presence of one or more qualifying PTVs within each pre-specified gene set.

Rare PTV burden analyses used the primary case–control subset defined in Section 4.8 (ASD n = 508; SZ n = 634; controls n = 8,442), requiring Japanese ancestry, pedigree-aware genetic independence, WGS availability and complete sex and PC1–PC10 covariates. Case–control enrichment (ASD vs. controls; SZ vs. controls) was tested using Firth bias-reduced logistic regression with sex and PC1–PC10 as covariates14, 15. Fisher’s exact test was additionally reported as a reference estimate. Multiple-testing correction within pre-specified gene-set families was controlled using the Benjamini–Hochberg false discovery rate (BH-FDR)16.

As a sensitivity analysis for inheritance patterns, we evaluated inherited-only PTVs in trio-eligible probands. Probands were required to meet the same PCA-based ancestry restriction, while parents were not required to be PCA-included, but were required to have WGS data available, preserving informative trios for inheritance-based robustness checks. Inheritance was determined by the presence of the same variant in at least one parent within the family structure.

**7.2. Rare CNV burden analysis**

To detect samples with aberrant CNV burden suggestive of technical artefacts, we computed per-sample autosomal CNV counts from the AnnotSV-annotated table, calculated percentile ranks and Z-scores across all samples, and excluded individuals in the top 1% (percentile ≥0.99) as high-burden outliers. Rare CNV burden analyses used the CNV/TAD case–control subset defined in Section 4.8 and shared with the 3D TAD-boundary analyses (ASD n = 505; SZ n = 627; controls n = 8,372). This subset was derived from the primary Japanese-ancestry, pedigree-aware case–control framework after exclusion of high-burden CNV outlier samples and complete sex and PC1–PC10 covariate availability.

To define and exclude benign SVs, we constructed a common CNV site mask from the autosomal AnnotSV table. CNVs were clustered separately by type (deletion or duplication) and chromosome using an 80% reciprocal-overlap criterion implemented via union-find clustering. Cluster-level carrier frequency was computed as the number of distinct carrier samples divided by the total number of unique samples in the input table. Clusters with carrier frequency ≥1% were designated common CNV sites and exported as exclusion intervals; any CNV with reciprocal overlap ≥0.5 to a common site was excluded from rare CNV analyses.

For gene-based CNV burden analyses, we focused on rare autosomal deletions intersecting MANE Select exons12. Starting from AnnotSV-annotated CNVs, we applied a conservative multi-step filtering strategy. Analyses were restricted to valid samples that were PCA-included and not flagged as high-burden. Only deletions were considered, with a minimum length threshold of 25 kb. CNVs overlapping curated NAHR-mediated genomic disorder loci (see below) were excluded to avoid confounding recurrent structural rearrangements with rare gene-level deletions. CNVs overlapping common CNV sites (frequency ≥1%) were removed using the reciprocal-overlap ≥0.5 criterion, and CNVs with high segmental-duplication content (overlap ≥70%) were excluded to reduce false-positive calls in repetitive regions. Finally, exon overlap was confirmed at the gene level using MANE Select exon coordinates12. Carrier status was defined per individual as the presence of one or more qualifying exonic deletions affecting at least one gene in each pre-specified gene set. Case–control enrichment was tested using Firth logistic regression adjusted for sex and PC1–PC10, with Fisher’s exact test as a reference and BH-FDR correction within pre-specified gene-set families14-16.

Recurrent genomic disorder CNVs mediated by NAHR were analysed separately using a curated locus list of 79 loci restricted to NAHR-flagged events. CNV-to-locus matching employed locus-specific rules to accommodate the boundary variability characteristic of NAHR-mediated rearrangements: for 15q11.2, we required target coverage ≥0.5 of the curated interval, whereas for all other loci, we required reciprocal overlap ≥0.5. Both deletions and duplications were included in NAHR analyses. Carrier status was computed for any NAHR genomic disorder CNV, as well as for disorder-annotated subsets based on curated locus-level phenotype flags. Association testing used Firth logistic regression with sex and PC1–PC10 adjustment as the primary model and Fisher’s exact test as a reference, with BH-FDR for multiple-testing correction14-16.

**8. Genic-proximal TRE outlier burden analysis**

**8.1. Overview and rationale**

We quantified rare genic-proximal TRE outlier burden using two complementary short-read approaches: ExpansionHunter Denovo (EHdn, v0.9.0)17 and STRling (v0.5.2)18. All analyses were conducted in Python 3.13 using statsmodels (v0.14.4) for regression modelling and SciPy (v1.15.2) for non-parametric tests; genomic interval operations used bedtools (v2.31.1); per-sample depth was estimated from samtools (v1.21) alignment statistics. Because using the same controls for both threshold definition and association testing can inflate test statistics, we used **fivefold cross-fitting** to define outliers and rareness in training controls and evaluate held-out samples exactly once.

**8.2. Sample lists and pedigree control**

Case–control burden analyses included ASD cases (n = 508), SZ cases (n = 634), and controls (n = 8,442) (total N = 9,584). To avoid inflation from related individuals, we selected one representative per pedigree, prioritizing individuals with complete covariates (depth, sex, PC1–PC10), followed by cases.

**8.3. Depth estimation**

Per-sample depth was estimated from samtools idxstats as total mapped reads scaled by read length and genome size, and consolidated into a single depth table used for modelling covariates and EHdn depth normalization.

**8.4. EHdn pipeline**

**8.4.1. EHdn profiling and genic restriction**

EHdn profiling was executed per sample against GRCh38 using repeat-unit length restrictions aligned to short tandem repeat (STR)-like motifs (min unit length 3 bp, max unit length 8 bp)17. EHdn output loci were restricted to genic-proximal regions defined by gene bodies ±1 kb using bedtools intersect.

**8.4.2. Depth normalization and merged locus table**

Anchored in-repeat read (IRR) counts were normalized to a 40× reference depth:
normalized count = raw count × (40 / sample depth).
A merged long-format table of genic loci and depth-normalized signals was constructed across samples; samples lacking depth were excluded.

**8.4.3. Motif canonicalization and locus clustering**

Repeat units were canonicalized by taking the lexicographically minimal sequence across all cyclic rotations of the motif and its reverse complement. To accommodate coordinate wobble inherent in anchored in-repeat-read mapping, loci were clustered within contig and canonical motif using a 1,000 bp start-distance threshold. Cluster-level signals per sample were computed by summing raw and depth-normalized IRR counts across loci in the cluster.

**8.4.4. High-specificity filters**

To maximize specificity in the novel-locus discovery setting, three additional post-clustering filters were applied before outlier calling. First, artefact-prone repeat motifs were excluded: four trinucleotide motifs susceptible to PCR stutter (AAC, AAG, ACT, ATC) and motifs containing telomeric (AACCCT), centromeric or satellite (AATGG) or other known artefact sequences (ACATCC). Motif filtering was applied to the canonicalized repeat unit so that all rotational and reverse-complement equivalents of each artefact class were captured by a single rule. Second, loci overlapping a curated blacklist of 111,706 genomic regions (hg38_ehdn_blacklist.bed)—encompassing centromeres, telomeres, pericentromeric satellites and segmental duplications—were removed via bedtools intersect (-v flag). To suppress alignment-driven false positives, this blacklist was constructed from UCSC RepeatMasker annotations, the ENCODE blacklist and known problematic EHdn regions. Third, a recurrent-hit filter excluded clusters in which outlier status was observed in more than 10 individuals across the entire cohort; such loci are unlikely to represent genuinely rare expansions and more likely reflect residual mapping artefacts or common polymorphisms not captured by the frequency filter. All three filters were applied consistently within each cross-validation fold during both the training-threshold definition and held-out evaluation steps, ensuring uniform filter criteria across the entire cross-fitted workflow.

**8.4.5. Cross-fitted outlier and rare-cluster definition**

Controls were partitioned into five folds using a fixed seed; cases were assigned deterministically based on sample identifier. For each fold f, cluster-wise mean and variance of depth-normalized IRR were computed in training controls (controls not in fold f), and Z-scores were computed for all training observations. Outlier events were defined at Z > 5.0, a conservative threshold chosen to maximize specificity for non-transformed count-based signals, with a minimum raw IRR count of ≥ 10. Rare clusters were defined by training-control outlier frequency <0.001. Held-out samples were evaluated exactly once using fold-specific parameters, yielding per-sample outlier counts and carriage status (≥1 rare TRE outlier). The number of observed clusters per sample was used as the exposure term for count models.

**8.4.6. Association models**

We fit (i) logistic regression for carriage of at least one rare TRE outlier and (ii) Poisson regression for per-individual outlier counts with offset(log [number of observed clusters]), adjusting for depth, sex and PC1–PC10 and encoding ASD/SZ membership as group indicators with controls as the reference. Group summaries were computed on the modelling set used for inference (individuals with complete covariates and at least one observed cluster).

**8.5. STRling pipeline**

**8.5.1. Genome-wide discovery and construction of a fixed genic in-bounds panel**

We performed genome-wide STRling candidate discovery by running STRling extract per sample to generate bin files and then STRling merge per chromosome across all bins to generate chromosome-specific bounds. Chromosome bounds were concatenated into a joint bounds file with coordinate-sorted duplicate removal. To align locus opportunity across samples and match EHdn repeat-unit definitions, we intersected joint bounds with the genic-proximal BED (gene bodies ±1 kb) and restricted repeat-unit length to 3–8 bp, producing a fixed genic in-bounds panel of 3,471 loci used for downstream case–control analyses.

**8.5.2. STRling call and enforcement of in-bounds genotypes**

We ran STRling call per case–control sample using the fixed genic in-bounds panel and each sample’s extract bin, producing per-sample genotype and unplaced outputs. To enforce a strictly fixed locus set and exclude out-of-bounds records, we post-processed genotype files by filtering to the exact in-bounds key set (chrom, left, right, repeatunit) defined by the bounds file. The filtered genotype files were used as the sole input to outlier calling.

**8.5.3. Outlier calling (STRling-outliers)**

Outlier statistics were computed using STRling-outliers.py on the in-bounds genotype files across the case–control cohort, producing per-locus outlier statistics and control-sample summaries. We defined an outlier event as Z > 5.0, adjusted P ≤ 0.05, and sum_str_counts ≥ 1. Because STRling’s outlier Z-score is derived from depth-normalized STR read counts (log2[(sum_str_counts + 1) / depth]), loci with sum_str_counts = 0 carry no direct STR read evidence and their outlier status reflects local depth variation rather than genuine expansion; requiring sum_str_counts ≥ 1 removes these depth-driven false positives from the burden count.

**8.5.4. Cross-fitted rare-outlier burden definition and models**

We implemented fivefold cross-fitting analogous to EHdn. Rare loci were defined as those with training-control carrier frequency <0.001 under the outlier event definition. Per sample, we computed the per-individual outlier count and carriage of at least one rare TRE outlier. Because all individuals were evaluated on a fixed panel, exposure was constant (n = 3,471) and used as offset(log [total number of tested loci]) in Poisson count models. Association testing used logistic regression for carriage of at least one rare TRE outlier and Poisson regression for per-individual outlier counts, adjusting for depth, sex and PC1–PC10, with pedigree-deduplicated complete-case selection as described above.

**8.5.5. Cross-caller concordance assessment**

To quantify cross-caller concordance, we compared per-individual outlier loci between EHdn and STRling. For each individual carrying at least one rare TRE outlier from both callers, we assessed whether any EHdn outlier cluster overlapped a STRling outlier locus within ±1,000 bp and whether the canonical motif (minimal rotation and reverse complement) matched. Among 321 individuals in whom both callers independently detected at least one rare TRE outlier, 188 (58.6%) shared at least one outlier locus at overlapping coordinates (ASD 52.0%; SZ 50.0%; controls 60.5%), with 96% canonical motif concordance among overlapping pairs. The modest overall overlap rate is expected given the distinct algorithmic frameworks: EHdn detects novel expansions from anchored in-repeat reads without a predefined catalogue, whereas STRling evaluates a fixed panel of 3,471 genic loci, so each caller identifies a partially non-overlapping set of expansion events.

**8.6. Long-read support assessment of rare TRE outlier loci**

To evaluate the locus-level accuracy of rare TRE outlier calls from the short-read WGS pipeline, we performed orthogonal evaluation using two independent long-read sequencing platforms—Pacific Biosciences (PacBio) HiFi and Oxford Nanopore Technologies (ONT) PromethION—in 66 case probands carrying short-read rare TRE outlier calls (6 ASD probands on PacBio HiFi; 60 on ONT PromethION). The support criterion (motif-concordant insertion or soft-clipped segment in the long-read alignment, assessed by visual inspection in the Integrative Genomics Viewer [IGV]) was applied identically across both platforms.

*PacBio HiFi long-read sequencing.* Six ASD case probands carrying rare TRE outlier calls had been independently sequenced on the PacBio Sequel II platform (chemistry S/P5-C2/5.0-8M). HiFi circular consensus sequence (CCS) reads were generated using ccs v6.4.0 with kinetics retention, aligned to the GRCh38 reference genome using pbmm2 v1.10.0 (--preset CCS) and processed for 5-methylcytosine detection using primrose v1.4.0 (SMRT Link v12.0.0).

*Oxford Nanopore PromethION long-read sequencing.* An additional 60 case probands carrying rare TRE outlier calls (33 ASD and 27 SZ) were sequenced on the Oxford Nanopore PromethION platform. Genomic DNA concentration was measured using the Qubit Fluorometer dsDNA BR Assay Kit (Thermo Fisher Scientific) and the Agilent 4200 TapeStation system (Agilent Technologies). To remove short DNA fragments, 3.0 μg of genomic DNA was subjected to size selection using the Short Read Eliminator Kit XS (Pacific Biosciences), after which, DNA quality and quantity were re-evaluated by Qubit and TapeStation. Sequencing libraries were prepared from approximately 1 μg of size-selected DNA using the Ligation Sequencing Kit V14 (SQK-LSK114, ONT) following the manufacturer’s protocol, except that salt-T4 DNA Ligase (New England Biolabs) was used in place of the standard T4 DNA Ligase. Library concentration was quantified using the Qubit dsDNA BR assay. For each sequencing run, 100 ng of the prepared library was loaded onto an R10.4.1 PromethION flow cell, with reloading of 100 ng of additional library every 24 hours after flow-cell washing using the Flow Cell Wash Kit (EXP-WSH004, ONT). Raw signal data were basecalled using Dorado v0.8.2 with the SUP model and aligned to the human reference genome (GRCh38).

*IGV-based motif-concordance support assessment (both platforms).* Aligned BAM files from both platforms were inspected visually in IGV. For each rare TRE outlier locus detected in a proband with available long-read data on either platform, we examined the corresponding genomic region (±1 kb of the short-read outlier coordinates for PacBio; ±2 kb for ONT to accommodate platform-specific coordinate offsets between short-read and long-read calls) in the long-read alignment. A short-read rare TRE outlier locus was considered long-read supported when one or more long reads showed a motif-concordant insertion or soft-clipped repeat-containing segment at the candidate locus. Motif concordance was assessed by inspecting the coloured base-pair display and insertion-sequence composition in IGV. We chose visual motif-concordance assessment over automated tandem-repeat genotyping tools (e.g. Straglr, ATaRVa) because the EHdn cross-fitting outlier set includes de novo expansion loci that are not constrained to a predefined catalogue, making direct motif-concordance inspection in long reads the most appropriate uniform support criterion across both platforms. The six PacBio probands contributed six evaluated rare TRE outlier calls (four detected by EHdn alone, two detected independently by both EHdn and STRling); all six had motif-concordant long-read support (6 of 6, 100% supported). The 60 ONT probands contributed 76 evaluated rare TRE outlier calls after intra-sample deduplication of EHdn and STRling double-counts. Of these, 67 of 76 (88.2%) had motif-concordant long-read support. Combined across both platforms, 73 of 82 (89.0%) evaluated short-read rare TRE outlier calls were long-read supported. Per-locus support results are provided in Supplementary Table 4.

**9. Integrated TADA-based gene discovery for ASD**

*Overview.* To identify genes associated with ASD risk, we performed an integrative Bayesian meta-analysis using the Transmission And De novo Association (TADA) framework10, 19. TADA models the expected number of risk variants per gene under a Bayesian prior and computes a Bayes factor (BF) comparing an alternative model (gene is a risk gene with elevated relative risk) to the null (baseline mutation rate). Evidence from multiple variant classes and cohorts is combined by multiplying independent BFs, enabling integration of de novo, inherited and case–control data across diverse sequencing studies without requiring raw genotype-level harmonization.

*Cohorts and sample sizes.* We integrated data from five cohorts for de novo SNV/indels, one for inherited and case–control variants and three for de novo CNVs. De novo SNV/indel cohorts: ASC (Fu et al.; 8,028 probands, 2,460 siblings), SPARK (Fu et al.; 7,008 probands, 3,032 siblings), the present study (Japanese WGS trios; 436 probands, 0 siblings), Kim et al.20 (Korean WGS trios; 696 probands, 0 siblings) and MSSNG (Canadian WGS resource; 4,967 probands, 501 siblings), totalling 21,135 probands and 5,993 siblings. Our trios were defined as ASD probands with both parental WGS data available (436 of 496 family-based ASD individuals). Kim et al. trios were extracted from Supplementary Table S2A of Kim et al.20. MSSNG probands and siblings were identified from Subject.tsv of the MSSNG database, restricted to complete triads (both parents present). Transmitted and case–control SNV/indel evidence was sourced exclusively from Fu et al. (transmitted: 21,135 probands; case–control: 5,591 cases, 8,597 controls) because these data require matched ascertainment and variant-calling pipelines not available across all cohorts. Our case–control data (N_case = 101, N_control = 8,610) were evaluated but not integrated, as the limited case sample size provided negligible statistical contribution. De novo CNV cohorts comprised Fu et al. (13,786 probands, 5,098 siblings), the present study (436 probands, 0 siblings) and MSSNG (4,967 probands, 501 siblings), totalling 19,189 probands and 5,599 siblings. This TADA integration used the full set of ASD proband–parent trios with parental WGS available (n = 436); by contrast, the descriptive ASD-vs-SZ de novo SNV/indel carrier-rate comparison reported in the main text used a stricter one-proband-per-family, joint-call-quality and ancestry-QC subset (ASD n = 376; SZ n = 293).

*Variant classification.* We classified coding variants into the following three functional categories10: PTVs (frameshift_variant, stop_gained, splice_donor_variant, splice_acceptor_variant as annotated by VEP); damaging missense (MisB: missense variants with missense badness, Polyphen-2 and constraint [MPC] score ≥ 2); and possibly damaging missense (MisA: missense variants with 1 ≤ MPC < 2). For MPC score extraction, when multiple transcripts were annotated for a given variant, we used the score corresponding to the MANE Select transcript12. Rare variants were defined as those with MAX_AF < 0.001.

*De novo CNV processing.* De novo CNVs were processed as follows10. CNVs were restricted to deletions and duplications overlapping 1–8 protein-coding genes with LOEUF < 0.6, indicating haploinsufficiency-constrained genes. CNVs overlapping known NAHR loci (≥ 50% reciprocal overlap) were excluded. MSSNG de novo CNVs were extracted from the database’s CNV callset and underwent the same filtering. Our de novo CNVs were called using the AnnotSV-based pipeline described in the CNV Methods section of this manuscript.

*Quality control across cohorts.* Each cohort was processed with its own variant-calling and QC pipeline, reflecting the source study’s protocols. This cross-cohort QC heterogeneity is an inherent feature of TADA-based meta-analyses: BFs are computed independently per cohort using cohort-specific mutation rates and sample sizes, such that within-cohort consistency is the primary requirement. This approach is consistent with Fu et al., which similarly combined cohorts with differing sequencing technologies. For our de novo variants, we applied filters for MAX_AF < 0.001 and selected MANE Select transcripts12. For Kim et al. de novo variants, we applied the QC criteria reported in the original publication, including Hail de novo calling quality metrics.

*Gonadal mosaicism deduplication.* For our cohort, where multiple ASD probands from the same family were included as independent trios (392 unique pedigrees among 436 probands), we identified de novo variants shared between siblings (same parental pair, same variant). Four such shared variants were detected, consistent with parental gonadal mosaicism rather than independent de novo events. These were deduplicated by retaining one observation per parent pair per variant. This deduplication did not affect the final TADA results, as none of the four shared variants met the MPC threshold for inclusion in the PTV, MisB or MisA categories.

*Bayes factor computation.* For each gene, BFs were computed independently for each evidence stratum: de novo SNV/indel BFs computed separately for each of the five cohorts and each variant class (PTV, MisB, MisA); inherited BFs from Fu et al. using transmission disequilibrium; case–control BFs from Fu et al.; and de novo CNV BFs across the three CNV cohorts. The total BF for each gene was computed as the product of all independent stratum-level BFs: BF_total = BF_PTV × BF_MisB × BF_MisA × BF_Deletion × BF_Duplication, where BF_PTV, BF_MisB and BF_MisA each represent the product of BFs across all cohorts contributing to that variant class.

*CNV BF reset rule.* To suppress false-positive CNV signals in genes without supporting SNV evidence, we applied the conservative rule from Fu et al.: if the maximum SNV-based BF for a gene (across PTV, MisB, MisA strata) was <5, the CNV BF (both deletion and duplication) was reset to 1.

*Bayesian FDR.* We computed Bayesian FDR following 19 and 10 using a prior probability of being a non-risk gene (π0) of 0.95. Genes were ranked by decreasing BF, and the cumulative FDR was computed as 1 – (cumulative mean of posterior probabilities). Genes with a Bayesian FDR ≤ 0.05 were reported as significantly associated with ASD. This yielded 267 genes at FDR ≤ 0.05 and 98 genes at FDR ≤ 0.001.

**10. Cross-ancestry meta-analysis of rare coding variants for schizophrenia gene discovery**

*Overview.* To extend the largest published exome-wide meta-analysis of rare coding variants in SZ11, we added a Japanese WGS stratum comprising 367 unrelated SZ cases, 8,610 population controls and 324 proband–parent trios. The analytical framework closely followed the approach of 11 and 21, which combined Cochran–Mantel–Haenszel (CMH) case–control association tests with de novo variant evidence through Fisher’s combined probability test. All analyses were performed in R (v4.3) using the stats and metap packages.

*Variant classes.* Four variant classes were evaluated per gene: (i) PTVs (stop-gained, essential splice-site and frameshift variants); (ii) PTVs plus damaging missense variants with MPC score > 3; (iii) PTVs plus missense variants with MPC > 2; and (iv) missense variants with MPC > 2 alone. The gene universe comprised all protein-coding genes evaluated by the SCHEMA consortium (after excluding three genes that map to alternative loci: ENSG00000119772, ENSG00000168769 and ENSG00000171456). Genes eligible for the MPC > 2 and MPC > 3 variant classes were restricted to those with at least one transcript annotated in the respective MPC gene list.

*Japanese case–control sample preparation.* From the Japanese WGS cohort, SZ case–control carriers were ascertained as follows. Cases were unrelated SZ probands (orphan individuals not belonging to any trio or duo family structure) after pedigree-aware deduplication (one individual per Pedigree_Key), yielding 367 independent cases. Controls comprised 8,610 population-based individuals from the NCBN. Qualifying variants were restricted to the MANE Select transcript per gene and required: genotype depth (DP) ≥ 10, alternate allele depth ≥ 5, variant allele fraction ≥ 0.25, Fisher strand bias (FS) < 20, mapping quality rank sum (MQRankSum) ≥ –2.0 and maximum population allele frequency (gnomAD MAX_AF) < 0.001. For each gene and variant class, the number of carriers (individuals with ≥ 1 qualifying variant) was counted, with per-sample deduplication so that each individual contributed at most one carrier event per gene.

*Japanese de novo variant integration.* De novo SNVs and indels from 324 Japanese SZ proband–parent trios were merged with existing de novo data from 3,444 published trios11. For PTV de novo events, all genes in the SCHEMA gene universe were eligible. For de novo missense variants, MPC-based eligibility was enforced: missense de novo events were counted only for genes present in the corresponding MPC gene list (MPC > 2 or MPC > 3). When both the published and Japanese de novo datasets provided a count for the same gene, counts were summed; when only one dataset had data, that value was used; when both were absent, the count was set to NA (not zero). Gene-level de novo P-values were combined using Fisher’s method (metap::sumlog) where both P-values were available, or the single available P-value was retained.

*CMH case–control association test.* Per-gene carrier enrichment in cases vs. controls was evaluated using two-sided CMH tests with continuity correction. The meta-analysis comprised 13 strata defined by genetically inferred ancestry and exome capture platform: 11 strata from the SCHEMA consortium (EUR exomes, EUR-N exomes, AFR genomes, EAS exomes, AMR exomes, FIN exomes, ASJ exomes, FIN genomes, EST genomes, AFR exomes and SAS exomes), one stratum from the Chick et al. in-house sample and one stratum from the Japanese WGS sample. Each 2 × 2 × 13 contingency table cross-classified carrier status (carrier vs. non-carrier) by case–control status across strata. A gene was tested only if the ‘two-strata rule’ was satisfied: the gene was required to carry at least one variant carrier in two or more independent strata. For autosomal genes, all 13 strata were used. For X-linked genes in the non-pseudoautosomal region, the Chick et al. in-house stratum was sex-stratified (male and female separately, yielding 13 strata: 11 SCHEMA + 2 sex-stratified in-house), and the Japanese stratum contributed zero carriers (set to full sample sizes with zero carrier counts), as sex-stratified carrier data were not available for the Japanese cohort; this all-zero stratum is effectively ignored by the CMH statistic.

*Hybrid meta-analysis combining case–control and de novo evidence.* Following 21 and 11, de novo evidence was integrated with case–control results using a conditional rule. For each gene and variant class, if the CMH P ≤ 0.01, the CMH P-value and the gene-level de novo P-value (when available) were combined using Fisher’s method (sumlog from the R metap package). The final meta-analysis P-value was then defined as: meta_P = min(CMH_P, Fisher_combined_P) when CMH_P ≤ 0.01, and meta_P = CMH_P otherwise. This conservative approach ensures that de novo evidence can only strengthen (not create) a case–control signal. For each gene, the variant class yielding the smallest meta_P was selected as the representative result.

*Multiple-testing correction.* A total of 18,043 genes passed the two-strata rule and were tested. Exome-wide significance was defined as Bonferroni-corrected P < 2.77 × 10–6 (0.05 / 18,043). FDRs were computed using the Benjamini–Hochberg procedure across all 18,043 tests, and genes with q < 0.05 were reported. This analysis identified 15 genes at exome-wide significance and 30 genes at FDR < 0.05.

**11. Polygenic risk score (PRS) analysis**

**11.1. Summary statistics preprocessing and coordinate harmonization**

For SZ, we used PGC3 wave3 summary statistics for both EUR and East Asian strata22. For ASD, we used iPSYCH/PGC ASD (Nov2017) summary statistics23. Summary statistics were QC-filtered to retain autosomal biallelic SNVs with INFO > 0.8, removing strand-ambiguous SNPs (A/T, C/G) and duplicated genomic positions (CHROM:POS). Coordinates were lifted from hg19 to GRCh38 using UCSC liftOver. Processed files were formatted for PRS-CSx (SNP, A1, A2, BETA, SE), converting odds ratios (ORs) to log(ORs) where needed and excluding variants lacking SE when using the BETA/SE input.

**11.2. Target genotype QC and rsID harmonization**

Target genotypes derived from the joint-called WGS cohort were converted to PLINK format and QC-filtered in PLINK2 by excluding variants with geno > 0.01 and variants failing HWE (P < 1 × 10–6), restricted to autosomes. Per-sample missingness filtering was not applied at the PRS stage because the upstream ancestry PCA pipeline already excluded samples with > 5% missingness, ensuring that all PCA-passed individuals had adequate genotype completeness for PRS computation. To harmonize SNP identifiers across target and summary statistics, we updated target BIM rsIDs using a coordinate-based mapping derived from the hg38-lifted summary statistics, allowing allele swaps and reverse-complement matches. PCA was performed on the QC-filtered Japanese-ancestry subset (N = 10,400; 298,416 common variants after LD pruning) using PLINK2 (v2.00a6) --pca 20 approx. The top 10 PCs (PC1–PC10) were used as covariates for population stratification adjustment in all PRS regression models.

**11.3. PRS-CSx inference and MHC exclusion**

PRS weights were inferred using PRS-CSx (v1.1.0; commit 29a1148) with the default coupled continuous shrinkage prior (phi=auto), HapMap3 SNP reference panels and LD blocks24,25. PRS-CSx was run per chromosome (chr1–22) with seed=123 and default MCMC settings (1,000 iterations, 500 burn-in, thinning factor 5). Posterior effect sizes were aggregated after all chromosomes completed.

- SZ PRS: modelled EUR and EAS summary statistics jointly with meta=True and ancestry-specific n_gwas inputs (EUR 127,906; EAS 27,363), pop=EUR,EAS.
- ASD PRS: EUR-only summary statistics with meta=False and n_gwas=46,351, pop=EUR.

We excluded the MHC region (hg38 chr6:28.5–33.5 Mb) from PRS construction and scoring using explicit range exclusion. After aggregation, we generated a PLINK2 weight file (SNP, A1, BETA), removed duplicated SNP IDs, extracted weighted SNPs from the target dataset and computed PRS with PLINK2 (v2.00a6) --score. After MHC exclusion, approximately 1,094,000 SNPs contributed to SZ PRS and approximately 1,027,000 to ASD PRS.

**11.4. PRS evaluation and pedigree handling**

All PRS statistical evaluation was conducted in R (v4.3.3) using the data.table and ggplot2 packages. PRS analyses were restricted to Japanese-ancestry individuals with complete sex and PC covariates (PC1–PC10) and phenotype labels (ASD/controls or SZ/controls). PRS was standardized to Z-scores using the mean and standard deviation (SD) of the combined analysis sample (cases and controls); association was evaluated using logistic regression (glm, family = binomial) with standardized PRS as predictor (reporting OR per 1 SD of PRS), adjusting for sex and PC1–PC10 as fixed covariates. ORs and 95% Wald confidence intervals were derived from the regression coefficient: OR = exp(β), CI = exp(β ± 1.96× SE). Predictive utility was quantified by comparing a base model (sex + PCs) to a full model (PRS + sex + PCs). The area under the receiver operating characteristic curve (AUC) was computed using the Mann–Whitney *U* rank statistic, with standard errors estimated by the Hanley–McNeil approximation26; 95% confidence intervals were constructed as AUC ± 1.96× SE. The incremental variance explained by PRS was assessed using Nagelkerke’s pseudo-R², defined as R² = [1 – exp((2/n)(ℓ0 – ℓ1))] / [1 – exp((2/n)ℓ0)], where ℓ1 and ℓ0 denote the maximized log-likelihoods of the fitted and null (intercept-only) models, respectively (ΔR² = R²_full – R²_base; ΔAUC = AUC_full – AUC_base). For decile-based risk stratification, PRS deciles were defined by quantile boundaries of the standardized PRS distribution across the combined analysis sample (cases and controls). The lowest decile (decile 1) served as the reference category, and decile-specific ORs were estimated from covariate-adjusted logistic regression (sex + PC1–PC10). Because PRS evaluation was hypothesis-driven with one pre-specified test per disorder, no multiple-testing correction was applied. PRS evaluations used the primary case–control subset defined in Section 4.8, which had already undergone pedigree-aware deduplication/relatedness pruning and required complete sex and PC1–PC10 covariates. Disorder-specific PRS analyses compared ASD cases with the shared control set for ASD PRS (ASD n = 508; controls n = 8,442) and SZ cases with the same shared control set for SZ PRS (SZ n = 634; controls n = 8,442). No additional PRS-specific pedigree pruning was applied beyond this fixed primary case–control sample definition.

**12. Cell-type-resolved TAD-boundary SV-burden analysis**

**12.1. 3D genome atlas and cell-type-specific boundary definition.** We utilized a comprehensive single-cell 3D genome atlas of the developing human brain3 to define cell-type-specific TAD boundaries. This atlas was generated using single-nucleus methyl-3C sequencing (snm3C-seq), a multi-modal technique that simultaneously captures chromatin conformation (Hi-C) and DNA methylation profiles from the same cell. The dataset encompasses >53,000 nuclei across four developmental stages (second trimester, third trimester, infancy and adulthood) in the prefrontal cortex (PFC) and hippocampus (HPC), yielding 161 distinct chromatin state clusters spanning excitatory neuron subtypes, inhibitory interneuron lineages (MGE- and CGE-derived) and non-neuronal cells (astrocytes, oligodendrocytes, microglia and vascular cells).

Domain boundaries were identified at 25-kb resolution using scHiCluster with pad = 2 and TopDom. For the present analysis, cell-type-differential boundary sets were taken directly from the published Level 2 (L2) differential boundary files. Static control boundaries used in the matched-static specificity analysis (Section 12.5) and the Diff_any vs. Static per-bin analysis (Section 12.6) were derived from the raw (non-imputed) boundary matrix by retaining bins with a scHiCluster/TopDom boundary value of 2 in at least two atlas observation units, excluding bins overlapping any published L2 differential boundary.

**Rationale for focusing on L2 differential boundaries.** The primary analysis intentionally focused on published L2 cell-type-differential boundaries rather than all raw boundary bins; this choice was hypothesis-driven. Prior SZ WGS work established that ultra-rare SVs can be enriched at brain TAD boundaries using bulk Hi-C-derived maps, but bulk-derived maps average chromatin conformation across the mixed cell populations present in each sampled tissue and provide tissue- or stage-level snapshots; therefore, they cannot distinguish generic boundary vulnerability from overlap with boundaries that are dynamically remodelled across developmental cell-state contexts. The Heffel et al.3 atlas provides differential boundary annotations across developing PFC and HPC cell groups, making it possible to test whether rare SV burden is concentrated at developmentally dynamic architectural elements. We did not assume that non-differential/static boundaries are functionally inert; instead, static boundaries were retained as a quantitative comparator to estimate the baseline association of boundary-bin overlap irrespective of cell-type-differential status.

Rather than analysing all 161 clusters individually—which would require stringent multiple-testing correction across many cell-state groups—or collapsing boundaries into broader trajectory-level annotations, we adopted the published L2 differential domain boundaries. L2 boundaries are defined at the cell-type level within each brain region, providing higher resolution than trajectory-level classes while maintaining biologically interpretable groupings. The L2 data consist of 11 cell-type-specific boundary sets, identified by the original atlas authors3 using three quality filters: (i) Z-score > 1.960, (ii) insulation fold change > 1.2 and (iii) boundary probability difference > 0.05.

One class (HPC Astro) was excluded a priori because the published L2 differential boundary call set contained fewer than 500 boundary bins (309 bins in the published bed file; 241 bins after intersection with the high-confidence raw boundary call in atlas observation units aggregating to the same L2 lineage, see below in this section), a threshold chosen to ensure adequate statistical power for enrichment testing. The resulting 10 analysable cell-type boundary classes are listed below; per-class counts give the number of unique 25-kb bins after intersection with raw boundary score = 2 in at least one atlas observation unit (region × developmental stage × cell-type) aggregating to the same L2 lineage (see below in this section):

**Hippocampal excitatory neuron classes (3):** HPC Exc-CA (851 bins), HPC Exc-DG (626 bins), HPC Exc-ENT (957 bins)

**Hippocampal inhibitory interneuron classes (2):** HPC Inh-CGE (709 bins), HPC Inh-MGE (522 bins)

**Prefrontal cortical excitatory neuron classes (2):** PFC Exc-DL (1,183 bins), PFC Exc-UL (1,195 bins)

**Prefrontal cortical inhibitory interneuron classes (2):** PFC Inh-CGE (1,401 bins), PFC Inh-MGE (1,136 bins)

**Prefrontal cortical astrocyte class (1):** PFC Astro (748 bins)

For each of the 10 analysed cell-type classes, we restricted the per-class bin universe to bins where the published L2 differential boundary annotation for that class coincided with a high-confidence raw boundary call in atlas observation units corresponding to that L2 lineage. The BrainDev_raw.boundary.h5ad matrix from Heffel et al.3 reports per-bin scHiCluster/TopDom boundary scores of 0/1/2 for each of 161 atlas observation units defined at the region × developmental stage × cell-type level (e.g. HPC_3T_Exc-CA1; trimester 2 / trimester 3 / infant / adult stages). Of these 161 observation units, those at neuronal and astrocyte cell types covered by one of the 11 published L2 differential boundary call sets aggregate to the 10 analysed L2 lineages by collapsing developmental stage and finer-grained sub-cluster labels (e.g. HPC_3T_Exc-CA-MossyCell, HPC_3T_Exc-CA1 and HPC_adult_Exc-CA all aggregate to L2 = HPC Exc-CA); observation units at non-neuronal lineages outside this set—microglia (MGC), oligodendrocyte/progenitor (ODC/OPC), radial glia, endothelial cells, pericytes/vascular cells (PCs, VLMCs) and Subiculum-FN1 excitatory neurons not part of the 11 L2 sets—do not contribute to any analysed L2 class. A bin was retained for a given L2 class when at least one observation unit aggregating to the corresponding L2 lineage received a raw boundary score of 2 at that bin and the published L2 differential boundary annotation for that class also covered the bin. This intersection ensures that every analysed differential bin is anchored by both the published L2 differential annotation and an independent high-confidence raw boundary call within the same lineage, mitigating residual annotation noise from imputation- or aggregation-driven differential calls. The resulting per-class bin counts (HPC Exc-CA 851, HPC Exc-DG 626, HPC Exc-ENT 957, HPC Inh-CGE 709, HPC Inh-MGE 522, PFC Exc-DL 1,183, PFC Exc-UL 1,195, PFC Inh-CGE 1,401, PFC Inh-MGE 1,136, PFC Astro 748; sum across classes = 9,328 owing to multi-class membership) collapse to 4,980 unique 25-kb genomic bins after cross-class deduplication. This 4,980-bin Diff_any universe is the bin set used in the per-individual exposure construction and primary boundary-burden association testing described above. For each individual, we quantified the number of unique 25-kb genomic bins overlapped by rare SVs within each boundary class. All class-level association statistics, three-cohort inverse-variance-weighted (IVW) meta-analyses and Diff_any vs. Static per-bin specificity tests reported in the Results and Supplementary Tables 5 and 6 were computed using this 4,980-bin Diff_any universe (per-class counts as listed above) as the bin set entering the per-individual exposure construction; the bin-level annotation file (bin_l2_annotation_v2) and downstream per-sample burden tables are deposited under Code availability.

**12.2. SV annotation, filtering and NAHR exclusion.** SVs were annotated using AnnotSV (full mode) and filtered to retain rare deletions and duplications with absolute length ≥ 25 kb, consistent with the upstream CNVkit pipeline size threshold. Common CNV sites (≥ 0.1% cohort frequency) were removed by one-directional overlap masking (overlap ≥ 30%). Samples exceeding the 99th percentile of total rare CNV count were excluded as high-burden outliers, yielding the CNV/TAD case–control subset described in Section 4.8. To mitigate short-read mapping artefacts in structurally complex genomic regions, SVs with ≥ 50% overlap with merged segmental-duplication intervals (UCSC segdup track, hg38) were excluded; SVs with ≥ 50% overlap with merged exclusion-region intervals were also removed. SV coordinates were converted to 0-based half-open intervals to ensure precise intersection with 25-kb boundary bins. An SV was counted as overlapping a boundary bin only when it covered ≥ 10% of the 25-kb bin.

Three SV-filter configurations were evaluated:

**Pattern A (primary):** NAHR-mediated genomic disorder loci excluded. Rare deletions and duplications overlapping curated recurrent genomic disorder regions—defined by known segmental-duplication-mediated NAHR loci—were removed prior to boundary-overlap quantification. The NAHR exclusion list comprised 55 curated loci, including 22q11.2, 1q21.1, 15q11-q13 and 16p11.2 (see Supplementary Methods Section 7 for full list). This configuration isolates non-recurrent, presumably unique deletion events that are more likely to reflect stochastic boundary overlap.

**Pattern B (sensitivity):** NAHR-mediated loci included. All rare SVs passing quality filters were retained, allowing assessment of whether the signal is robust to inclusion of recurrence-prone pathogenic rearrangements.

**Pattern C (secondary sensitivity):** NAHR-excluded and SV length ≤ 1 Mb. This configuration further restricts to smaller SVs to assess whether the signal is driven by large genomic rearrangements.

**12.3. Association model specification.** The primary architecture-level end-point was rare deletion (or duplication) burden at the aggregate Diff_any union (4,980 unique 25-kb bins differential in at least one of the 10 analysed L2 cell-type boundary classes). Class-level L2 enrichment was performed as a secondary localization family. Both used the gene-overlap-adjusted B' logistic regression model:

**Model B':** case ~ n_boundary_k + Sex + PC1–PC10 + log1p(total_bases_svt) + log1p(total_gene_svt),

where n_boundary_k is the count of unique boundary bins of type k overlapped by rare SVs, total_bases_svt is the genome-wide sum of rare SV span for the corresponding SV type (DEL or DUP) and total_gene_svt is the number of unique protein-coding genes (GENCODE v46) overlapped by rare SVs of the corresponding type.

Model B' was chosen as the primary specification because the gene-overlap covariate (total_gene_svt) directly addresses the most important potential confound: the possibility that boundary-overlapping SVs are enriched in ASD simply because they tend to overlap more genes, and gene dosage perturbation—rather than 3D architectural disruption—drives the association. By including total_gene_svt alongside the SV-length covariate (total_bases_svt), Model B' provides a conservative test of whether boundary-bin burden remains associated with disease status beyond what is explained by the global genic and genomic SV load. All SV-burden covariates were log1p-transformed and calculated separately for deletions and duplications.

Sample sizes after high-burden exclusion (≥ 99th percentile of total rare CNV count): ASD n = 505, SZ n = 627, controls n = 8,372. Effective sample sizes per comparison after covariate missingness exclusion: ASD vs. controls n_complete = 8,877; SZ vs. controls n_complete = 8,999; ASD vs. SZ multinomial heterogeneity n_complete = 9,504.

**12.4. Multiple-testing correction.** Benjamini–Hochberg (BH) correction was applied hierarchically across two families: (i) the primary aggregate family of four ASD/SZ × DEL/DUP tests at the aggregate Diff_any union; and (ii) the secondary class-level localization family of 10 L2 class tests per comparison × SV-type stratum. Each comparison × SV-type combination represents a distinct biological hypothesis and was BH-corrected within its own stratum.

**12.5. Matched-static specificity analysis.** To test whether the ASD deletion enrichment is specific to cell-type-specific differential boundaries rather than a generic property of boundary overlap, operating on the same 4,980-bin Diff_any universe as in primary association testing (Section 12.3) to ensure observed exposures and matched-static null distributions are constructed from a single annotation-level reference set, we compared the observed OR for each cell-type boundary class against a null distribution of ORs from property-matched static boundaries. Static boundaries were defined as boundaries not annotated as differential in the Heffel framework3—that is, boundaries that did not meet the differential boundary criteria across the developmental stages and cell types profiled.

We did not report chromosome-only matching as a separate L1 analysis. Instead, all matched-static results were generated under a single L2-primary matching algorithm, specified as follows.

**Matching algorithm:** Exact matching on chromosome, gene-density bin and segmental-duplication bin was attempted first, with local progressive relaxation applied only when the exact-match candidate pool fell below a minimum threshold (MIN_EXACT_POOL = 10 candidate static bins per differential bin). When the exact-match pool was insufficient, the matching criterion was progressively relaxed to chromosome + gene-density bin, and then to chromosome only, as a within-algorithm fallback. Within each candidate pool, a distance-weighted sampling prioritized candidates by the similarity of gene_density and segdup_pct values to those of the focal differential bin.

**Resampling and empirical P-value:** For each differential boundary class, we resampled 10,000 matched sets of static boundaries under the above algorithm. The same B' logistic regression model was applied to each resampled static set, and the empirical P-value was computed with a pseudo-count adjustment to avoid zero P-values under finite resampling: P_empirical = (1 + number of resampled ORs ≥ observed OR) / (1 + n_resamples), with n_resamples = 10,000, so the minimum reportable P-value is 1/10,001 ≈ 9.99 × 10–5. In parallel, an event-level matched-static analysis was conducted using deletion-event counts (n_exposed_case_events vs. n_exposed_ctrl_events) rather than per-individual carrier indicators; the same matched-static permutation framework was applied to compute event-level observed ORs and event-level empirical P-values. This specification yields the per-individual and event-level values reported in Supplementary Table 6, Panel B and shown in Fig. 3c.

**Rationale for dropping a separate L1-only analysis:** Chromosome-only matching does not control for gene-density or segmental-duplication confounding, which are established architectural correlates of boundary placement and SV rate. Therefore, we chose a single L2-primary specification for confirmatory reporting; chromosome-only relaxation within the L2 algorithm is used only as a locally adaptive fallback when the strict exact-match pool is insufficient and does not contribute to the primary inferential statement. Match-level composition (exact_L2, chrom_gene, chrom_only) was tracked for QC and retained in the analysis output used to generate Supplementary Table 6, Panel B. The differential-union aggregate test pooled all differential boundary bins into a single exposure variable and was tested against matched-static union resamples under the same algorithm.

**12.6. Boundary-type specificity analysis (Diff_any vs. Static per-bin).** To test whether the class-level ASD deletion signal preferentially localized to cell-type-differential boundaries rather than reflecting a generic effect at any boundary bin, using the same 4,980-bin Diff_any universe as in primary association testing (Section 12.3), we classified 25-kb bins into two mutually exclusive categories:

**Diff_any:** the union of 25-kb bins annotated as differential in at least one of the 10 analysable L2 classes. A bin was counted once in Diff_any regardless of how many classes it was differential in.

**Static (comparator):** 25-kb bins annotated as boundaries (boundary value ≥ 2 in at least two atlas observation units in the raw non-imputed boundary matrix) but non-differential in all 10 analysable L2 classes. To evaluate preferential localization of the ASD deletion signal to cell-type-differential boundaries, static boundaries were included as a quantitative comparator category rather than as an independent confirmatory enrichment end-point.

**Statistical model:** The same B' logistic regression model (case ~ n_boundary_k + Sex + PC1–PC10 + log1p(total_bases_svt) + log1p(total_gene_svt)) was applied with each category’s per-bin count as the exposure variable. Effect estimates and between-cohort heterogeneity were assessed by a two-cohort (Japanese arrayCGH + MSSNG) external IVW fixed-effect meta-analysis with Cochran’s Q (df = 1) and I², as described in Section 12.8.

**Sidedness convention:** For Diff_any, one-sided P-values tested the pre-specified direction of ASD enrichment. Static boundaries were evaluated against the same pre-specified direction solely for comparability, with the understanding that static serves as a quantitative comparator rather than as a confirmatory enrichment end-point; any small nominally positive static effect is interpreted as a reference baseline against which the preferential localization of the Diff_any signal is quantified. The full per-cohort and meta results are reported in Supplementary Table 6, Panel C, and the meta-level bar plot is shown in Fig. 3d.

This two-category specification provides a threshold-free comparison between cell-type-differential and non-differential boundary bins, avoiding additional support-count-defined subgroups.

**12.7. ASD-vs-SZ heterogeneity analysis.** ASD-vs-SZ heterogeneity was assessed at two levels. (i) Aggregate architecture-level: a B' logistic regression coding ASD as case (1) and SZ as control (0), using the aggregate Diff_any union DEL/DUP exposure as the predictor under the same B' covariates as the primary case–control analysis (Section 12.3). This yields a direct ASD-vs-SZ contrast at the architecture-level end-point without relying on shared-control covariance, and the two ASD-vs-SZ DEL/DUP tests were BH-corrected as a two-test family. (ii) Per-class secondary localization: to map the class-level distribution of cross-disorder asymmetry, we performed a per-class multinomial logistic regression with Controls = 0 (baseline), ASD = 1 and SZ = 2, fitted by Newton’s method and adjusting for sex, PC1–PC10, log1p(total_bases_svt) and log1p(total_gene_svt), for each of the 10 analysable L2 boundary classes (ASD n = 505, SZ n = 627, Controls n = 8,372). The heterogeneity contrast was δ = β_ASD – β_SZ, with Var(δ) = Var(β_ASD) + Var(β_SZ) – 2·Cov(β_ASD, β_SZ) derived from the joint covariance matrix, thereby accounting for shared-control covariance. A two-sided Wald Z-statistic and P-value was computed per class. As a sensitivity check, a more conservative coefficient-difference test that assumed independent ASD-vs-control and SZ-vs-control estimates yielded directionally concordant results across all boundary classes. Class-level global directional consistency was summarized by a correlation-adjusted Stouffer Z-method (Brown’s variance correction for inter-class burden correlation) and a one-sided binomial sign test across the 10 classes, both specified a priori for the directional alternative ASD > SZ. Signed class-level Z-values were combined with equal weights because all 10 classes were fitted in the same discovery analytic sample so effective sample-size-based weighting would be numerically near-uniform; the variance-adjustment term accounts for the empirical mean inter-class correlation (ρ ≈ 0.42 in the discovery DEL analysis). The binomial sign test evaluates whether the proportion of classes with β_ASD > β_SZ exceeds the chance expectation of 5 of 10. Class-level heterogeneity P-values were two-sided because they were used to identify individual classes without imposing a class-specific directional claim, whereas the class-level global directional Stouffer and sign tests were one-sided because the family-level alternative ASD > SZ was specified a priori. The 10-class ASD-vs-SZ heterogeneity test family was pre-specified as independent of the ASD-vs-Control nine-class confirmatory family (Section 12.8). All 10 analysable L2 classes were included in the ASD-vs-SZ heterogeneity test family regardless of their ASD-vs-Control significance status; this design choice avoids conditioning on ASD-vs-Control discovery significance and prevents selection-bias inflation of the δ contrast under the null. External replication of ASD > SZ heterogeneity was tested in the arrayCGH external cohort only (Phase 6C in the 10-L2-class × DEL analysis), because MSSNG does not include SZ samples; discovery and arrayCGH heterogeneity results are reported in Supplementary Table 5, Panel E and Supplementary Table 6, Panel E, respectively.

**12.8. Replication in independent ASD cohorts.** To assess the generalizability of the discovery findings, we tested replication in two independent datasets with different ascertainment and genotyping platforms using the same 4,980-bin Diff_any universe as in primary association testing (Section 12.3) via per-cohort burden tables generated from the bin_l2_annotation_v2 join:

*Extended Japanese arrayCGH cohort.* ASD case–control data (838 cases, 3,583 controls), based on the previously reported Japanese arrayCGH cohort of Kushima et al.4 with additional samples, were genotyped on high-resolution array CGH platforms (Agilent and NimbleGen). All samples overlapping with the discovery WGS dataset were excluded before analysis. CNVs were further filtered to exclude events with ≥50% segmental-duplication coverage and ≥50% overlap with merged exclusion-region intervals (centromere and telomere boundary regions), harmonizing low-mappability and exclusion-region QC with the discovery WGS and MSSNG pipelines. To account for platform-dependent probe resolution, the B’ logistic regression model was fitted separately within each platform stratum (Agilent: 514 cases, 2,760 controls; NimbleGen: 324 cases, 823 controls), adjusting for sex, log1p(total_bases) and log1p(total_gene). Stratum-specific log-OR estimates were combined by within-array IVW fixed-effect meta-analysis, with Cochran’s Q statistic and I² index to assess between-platform heterogeneity. This within-array platform IVW summary estimate was used as the arrayCGH input for the cross-cohort meta-analysis described below. No ancestry PCs were available for this cohort.

**MSSNG WGS cohort.** The MSSNG cohort27 (5,955 ASD probands and 511 unaffected siblings from 4,978 families) was analysed using a generalized estimating equation (GEE) logistic model with binomial family, independence working correlation structure and family-level clustering (FAMILYID), adjusting for sex, log1p(total_bases), log1p(total_gene), ancestry (dummy-coded) and sequencing platform (dummy-coded). We used GEE rather than a one-proband-per-family reduction because restricting to a single proband per family would have discarded approximately 977 ASD probands from multiplex families and substantially reduced power; GEE family-level clustering accounts for within-family correlation. The independence working correlation was adopted because the exchangeable structure failed to converge across all tested boundary classes. The binary outcome was ASD proband vs. unaffected sibling. This complementary design provides replication from a family- rather than a population-based framework.

The primary external replication analysis used a two-cohort (arrayCGH × MSSNG) cross-replication IVW fixed-effect meta-analysis combining the arrayCGH within-array platform IVW summary estimates with the MSSNG GEE estimates, with Cochran’s Q (df = 1) and I² to assess between-cohort heterogeneity. For the nine discovery-positive classes (BH-FDR < 0.05 in the discovery WGS analysis), two-cohort cross-replication was assessed by one-sided BH-FDR < 0.05 testing the same direction of effect as discovery. The discovery-non-significant class (PFC Astro) and negative controls, where evaluated, were assessed using two-sided tests. Descriptive estimates for all 10 classes are reported in Supplementary Table 6, Panel A. We did not apply a three-way pooled meta-analysis combining discovery WGS with arrayCGH and MSSNG, reserving discovery WGS as the discovery-defining cohort and using the two external cohorts as the primary replication evidence, in line with standard two-step discovery-replication designs in psychiatric genetics meta-analyses.

**ArrayCGH cross-disorder extension.** To examine whether the ASD-preferential noncoding burden observed in the discovery WGS analysis extends to an independent platform, we performed two additional analyses using the arrayCGH data (Supplementary Table 6, Panel E). First, SZ binary burden was assessed using a B' logistic regression model with sex, log1p(total_bases), log1p(total_gene) and platform (Agilent vs. NimbleGen) as covariates in the pooled arrayCGH sample (n = 2,683 SZ cases after excluding samples overlapping with the discovery WGS SZ dataset; n = 3,583 controls); platform-stratified IVW results are additionally reported as a sensitivity analysis. Second, cross-disorder heterogeneity was tested by fitting a multinomial logistic regression model with three-level outcome (Control = 0, ASD = 1, SZ = 2; n = 7,104) and B' covariates (sex, log1p(total_bases), log1p(total_gene), platform). The heterogeneity statistic z_het = (β_ASD – β_SZ) / SE_joint was computed as in the discovery analysis. Class-specific heterogeneity P-values were derived from two-sided Wald tests, whereas class-level global directional consistency was summarized by a correlation-adjusted Stouffer Z-method with Brown’s variance correction and a one-sided sign test, both specified a priori for the directional alternative ASD > SZ, consistent with the discovery ASD-vs-SZ heterogeneity convention (Section 12.7). Platform-stratified sensitivity analyses (Agilent-only and NimbleGen-only, each without the platform covariate) were conducted to verify that the results were not driven by a single platform. The ASD arrayCGH sample (n = 838) used in the heterogeneity analysis was identical to that used in the ASD replication analysis and likewise excluded all individuals overlapping with the discovery WGS dataset. Ancestry PCs were not available for the arrayCGH cohort; however, all arrayCGH samples were recruited from Japanese cohorts. MSSNG does not include SZ samples and therefore cannot contribute to external replication of ASD>SZ heterogeneity.

**12.9. Sensitivity analyses: Pattern B/C and aggregate-signal robustness.** As pre-specified sensitivity analyses, we repeated the full association testing framework under two alternative SV-filter configurations. Under Pattern B (NAHR-mediated loci included), all nine ASD × DEL associations observed under Pattern A remained directionally concordant with the primary analysis, confirming that the signal is not driven by the exclusion of recurrent rearrangements. Pattern B results also provide descriptive SZ × DEL effect estimates across the 10 classes for transparency. Under Pattern C (NAHR-excluded and SV length ≤ 1 Mb), which further restricts to smaller SVs to assess whether the Pattern A signal is driven by large genomic rearrangements, the ASD × DEL signal was attenuated but remained broadly directionally supportive across classes, indicating that the primary Pattern A signal was not driven solely by large genomic rearrangements. Both Pattern B and Pattern C use the same B' logistic regression specification, covariates, BH-FDR correction grouping and sample sizes as Pattern A. Full Pattern B results are provided in Supplementary Table 5, Panel B; Pattern C results are in Supplementary Table 5, Panel C. Aggregate-signal robustness was assessed by four additional sensitivity layers for the ASD-DEL aggregate Diff_any end-point: (i) standard leave-one-class-out (standard LOCO_k), which removed bins uniquely assigned to class k while retaining bins also differential in at least one other L2 class; (ii) strict LOCO (Strict LOCO_k), which removed all bins participating in class k, including class-shared bins; (iii) top-N sample exclusion (N = 1, 2, 3, 5; samples sorted by Diff_any DEL exposure descending); and (iv) top-N event exclusion (N = 1, 2, 3, 5; deletion events sorted by number of disrupted Diff_any bins descending). For each, the B′ logistic ASD-DEL model was refit and the resulting OR was compared with the full-Diff_any baseline; the results are reported in Supplementary Table 6, Panel L.

**12.10. Exploratory locus illustration.** To select representative loci for genomic illustration (Fig. 3f; Supplementary Table 6, Panel F), we mapped rare ASD deletions overlapping Diff_any bins (25-kb bins annotated as differential in at least one of the 10 analysed L2 classes) to TAD domains reconstructed from the Heffel3 L2 boundary data. This selection is an exploratory illustration only; no formal gene-burden significance test, systematic candidate-gene ranking, network-based priority scoring or integrated-score ordering was performed.

*TAD domain reconstruction.* For each L2 class, consensus boundary bins were defined as bins in which at least two of the class’s constituent observation units (region × stage × cell-type groups) had a raw boundary value ≥ 2. TAD domains were then defined as the genomic intervals between adjacent consensus boundary bins on each chromosome. Rare ASD deletions overlapping Diff_any bins were mapped to their overlapping TAD domains, and protein-coding genes (GENCODE v46) within flanking Diff_any-bounded domains were extracted for illustrative review.

*Representative locus selection.* Representative loci shown in Fig. 3f were selected based on interpretable deletion–boundary–gene configurations near constrained neurodevelopmental genes overlapping curated ASD/NDD and/or SFARI 1–2 gene sets under strong evolutionary constraint (LOEUF < 0.35). The three representative examples shown (SMARCA2 at chr9p24.3, LOEUF = 0.203; NFIB at chr9p23, LOEUF = 0.225; AUTS2 at chr7q11.22, LOEUF = 0.253) illustrate the general pattern of rare ASD deletions overlapping cell-type-differential TAD-boundary annotations near constrained neurodevelopmental genes.

*Caveats.* These locus-level associations are exploratory and do not constitute independent proof of causality at any single locus; all locus-level associations require follow-up in independent datasets and functional experiments. Representative loci were chosen for readability of the Fig. 3f schematic and coherence with the architecture-level boundary-disruption enrichment results presented in the main text; they are not the output of a systematic ranking procedure.

**12.11. Aggregate exon-exclusion sensitivity analyses.** To assess whether the ASD deletion enrichment at TAD boundaries was confounded by direct protein-coding exon disruption, we pre-specified a two-test exon-exclusion confirmatory family in the discovery WGS and independent MSSNG WGS cohorts, with Holm correction over the two MSSNG one-sided replication P-values. The reported family was restricted to these two complementary bin-level tests because the mechanistic question was whether boundary-bin enrichment persists when protein-coding exons are removed from, or jointly modelled within, the boundary exposure. Protein-coding exon coordinates were extracted from GENCODE v46 (gene_type = ‘protein_coding’, feature = ‘exon’) and merged per chromosome. Each 25-kb boundary bin was classified as exon-overlapping if it overlapped any merged exon interval, and exon-free otherwise; 37,375 of 67,185 bins (55.6%) were classified as exon-free. A1 (primary confirmatory test) entered the exon-free-bin count as the primary exposure in a model that does not jointly include exon-overlapping bins as a covariate, testing whether the ASD deletion signal persists after excluding exon-overlapping boundary bins from the exposure. In the discovery cohort, A1 was fitted using Firth-penalized B'-adjusted logistic regression to provide bias-reduced inference at moderate event counts; in the MSSNG cohort, A1 was fitted using a GEE Binomial Independence model with family-level clustering. A2 (supporting mechanistic test) entered both exon-free-bin and exon-overlapping-bin counts simultaneously as co-exposures (Pearson r = 0.354, VIF = 1.14; well below standard collinearity thresholds), testing whether the exon-free component remains associated with ASD after simultaneous adjustment for exon-overlapping boundary-bin burden. In the discovery cohort, A2 was fitted using the standard B'-adjusted joint logistic regression (without Firth penalization) to preserve the interpretability of joint covariate-adjusted coefficients; Firth estimates were computed as a sensitivity check and yielded directionally concordant results. In the MSSNG cohort, A2 was fitted using the GEE Binomial Independence model with family-level clustering, as in A1. Holm correction was applied over the two MSSNG one-sided replication P-values (A1_MSSNG and A2_MSSNG) to control the family-wise error rate within the exon-exclusion confirmatory family at the MSSNG replication stage. Discovery BH-FDR was reported as a descriptive discovery-stage measure; formal replication inference for this family was based on Holm-adjusted MSSNG one-sided P-values. arrayCGH was not used as a formal exon-exclusion replication platform because clinical aCGH probe designs preferentially cover coding exons and have limited sensitivity for exon-poor and intergenic CNVs28, 29. All exon-exclusion models used the same B' logistic regression covariate framework as the primary analysis (Sex, PC1–PC10, log1p(total_bases_svt), log1p(total_gene_svt)); discovery A1 was fitted by Firth-penalized maximum-likelihood estimation (statsmodels Firth), discovery A2 by standard maximum-likelihood estimation (statsmodels GLM Binomial) and MSSNG A1 and A2 by GEE with binomial family, independence working correlation and family-level clustering (FAMILYID). The results are reported in Supplementary Table 5, Panel D (discovery) and Supplementary Table 6, Panel D (replication), including ORs with 95% CIs, one- and two-sided P-values, discovery BH-FDR and MSSNG Holm-adjusted one-sided P-values.

**12.12. Diff_any-bounded TAD-scale regulatory-domain constraint-enrichment analysis.** For the domain-level constraint-enrichment analysis, we reconstructed flanking regulatory domains using Diff_any boundary anchors from the same 4,980-bin Diff_any universe as in primary association testing (Section 12.3). The tested hypothesis concerned rare deletions overlapping cell-type-differential TAD-boundary annotations and the constrained genes residing in their adjacent dynamic-boundary-bounded domains. We therefore aligned the domain-level gene-assignment rule with this hypothesis and refer to these intervals as Diff_any-bounded TAD-scale regulatory domains, operationally defined as genomic intervals between adjacent Diff_any boundary anchors on the same chromosome. Diff_any anchors comprised bins annotated as Diff_specific_n1 or Diff_shared_n2plus in the boundary classification, together with any collapsed Diff_any label when present. This reconstruction yielded 3,718 domains with a mean size of 697 kb and a median size of 450 kb. Static boundaries were not assumed to be biologically irrelevant; rather, they were not used to subdivide the primary domain-level analysis further because the tested hypothesis concerned deletions overlapping cell-type-differential TAD-boundary annotations. Distance-based boundary-proximal windows at ±250, ±500 and ±1,000 kb around each disrupted Diff_any boundary bin were evaluated as TAD-free sensitivity analyses. As a high-resolution sensitivity definition, we also evaluated an all-boundary reconstruction including both Diff_any and Static anchors; this definition was retained as a descriptive sensitivity because it produced highly fragmented intervals (median ~50 kb) and sparse constrained-gene exposure. For each rare deletion with ≥10% overlap of a Diff_any boundary bin in each sample, we assigned the union of protein-coding genes whose midpoints fell within the left and right Diff_any-bounded domains flanking the disrupted bin. Genes were deduplicated per individual by GENCODE v46 gene ID. Constrained-gene burden was defined using gnomAD v2.1.1 LOEUF < 0.35 as the primary threshold, with LOEUF < 0.6 and probability of being loss-of-function intolerant (pLI) > 0.9 evaluated as cut-off sensitivities. Genes lacking a LOEUF estimate were not included in the unconstrained category. To address the possibility that constrained-gene enrichment was driven by deletions directly overlapping gene bodies, we performed an exact direct-overlap exclusion sensitivity. In this analysis, any flanking-domain protein-coding gene whose body coordinates overlapped the same deletion (gene_start < deletion_end AND gene_end > deletion_start) was removed before recomputing constrained and unconstrained burden counts. Per-sample SV interval coordinates were used to determine direct-overlap exclusion in all three cohorts (WGS event-bin file, arrayCGH event identifier parsing and MSSNG SV-interval-aware event-bin dump). Association testing used the same B′ covariate framework as the main boundary analysis, additionally adjusting for unconstrained known genes within the same flanking Diff_any-bounded domains. The final domain-level constraint-enrichment analysis plan was fixed before running the Diff_any-bounded association and external meta-analyses. WGS Discovery used pooled logistic regression adjusted for sex, PC1–PC10, log1p_total_del_bases and log1p_total_gene_DEL, while arrayCGH used platform-stratified logistic regression in Agilent and NimbleGen strata, followed by within-array IVW meta-analysis. MSSNG used GEE logistic regression with binomial family, independence working correlation, FAMILYID clustering and adjustment for sex, log1p_total_del_bases, log1p_total_gene_DEL, ancestry and platform. The two-cohort external IVW meta-analysis combined the arrayCGH within-array IVW and MSSNG GEE estimates. The primary summary estimate for the constraint-enrichment analysis is a fixed-effect three-cohort IVW meta-analysis combining the WGS Discovery, arrayCGH within-array IVW and MSSNG GEE estimates, reported as two-sided. The exact direct-overlap exclusion sensitivity is computed in the same three-cohort IVW framework to maintain consistency in cohort composition with the primary summary estimate. The independent two-cohort external IVW meta-analysis combining only arrayCGH and MSSNG is retained as an external replication estimate (for both the primary and direct-overlap exclusion sensitivity), and the WGS Discovery cohort-level estimate is reported alongside as a discovery-cohort component estimate. The β_constr – β_unconstr contrast was computed from the model covariance matrix in the external two-cohort IVW framework and reported as a supporting constraint-specificity analysis. The results are reported in Supplementary Table 6, Panels G and H, with the primary forest plot in Fig. 3e and the full sensitivity panel in Supplementary Fig. 2.

**12.13. Joint-layer logistic regression integrating WGS-enabled and established genetic risk layers.** As an integrative sensitivity analysis, we evaluated whether the primary WGS-enabled signals (TAD Diff_any-boundary deletion burden and rare TRE outlier carriage) were retained after adjustment for established coding, CNV, polygenic or repeat-expansion risk layers. We fitted parallel binary logistic regression models for ASD vs. Controls and SZ vs. Controls under the same model structure (Supplementary Table 11, Panel A), and a multinomial logistic regression with shared controls for formal ASD-vs-SZ TAD coefficient contrast (Panel C). Six variant-class layers were progressively added to a B′-aligned base model (Sex_numeric + PC1–PC10 + log1p[total_del_bases] + log1p[total_gene_DEL]), with sequencing depth additionally included to maintain compatibility with the TRE-layer pipeline. The progression was M0 (base) → +TAD (Diff_any_DEL count) → +TRE (rare_any binary) → +PRS (disorder-specific PRS-CSx, MHC-excluded, z-scored within controls of the joint subset) → +PTV (binary; rare PTV in disorder-specific risk-gene set: asd_fu_fdr005 [185 genes] for ASD and scz_chick_fdr005 [28 genes] for SZ) → +CNV (binary; rare exonic deletion overlapping the disorder-specific risk-gene set) → +NAHR-CNV (binary; carrier of NAHR-mediated genomic disorder loci flagged disorder-specifically: 27 ASD-associated loci and 9 SZ-associated loci from the curated genomic disorder set; Section 12.2). Conditional contribution of each layer was assessed by added-last likelihood-ratio tests comparing the full model to the same model with that single layer removed. The multinomial logistic regression (Controls = baseline; ASD and SZ as alternative outcomes) was implemented in base R via maximum-likelihood estimation using the BFGS optimizer with analytical gradient and Hessian inverse for variance–covariance estimation; the Wald statistic for β_TAD,ASD – β_TAD,SZ was computed as Δβ / sqrt[var(β_ASD) + var(β_SZ) – 2·cov(β_ASD, β_SZ)] using the diagonal and off-diagonal vcov entries. The multinomial contrast was reported in five matched-subset variants (Panel C): a caller-independent TAD-only model in the maximal TAD complete-case subset; caller-specific TAD-only and TAD+TRE models in the EHdn complete-case subset (with sequencing depth); and the matched pair in the STRling complete-case subset. A Static-boundary sensitivity model further added log1p_Static_DEL alongside Diff_any_DEL and the other five layers (Panel D) to test whether the Diff_any signal was robust to generic boundary disruption. The SZ exonic risk-gene CNV layer (Matched_SZ; scz_chick_fdr005 gene set) was estimated from a small carrier set in the joint subset (5 SZ cases and 32 controls; consistent with the rare CNV burden estimates in Supplementary Table 7, Panel B), yielding a wide confidence interval; the resulting full-model effect estimate (OR ≈ 2.4, P ≈ 0.08) should therefore be interpreted as directional. (Note: the analytic pipeline used readr::read_tsv with guess_max = Inf to ensure correct character-type parsing of sparsely populated Matched_SZ values, of which the first non-empty entry occurs after the default guess_max threshold.) Pearson correlations among the six layers in controls and per-model glm convergence diagnostics are reported in Panel F. The results are summarized in Supplementary Table 11.

**Additional sensitivity analyses for domain-definition dependence and WGS component consistency.** Three additional descriptive sensitivity analyses were performed to address potential dependence on the operational Diff_any-bounded domain definition and the WGS Discovery non-significant point estimate. (i) TAD-architecture-free distance-based symmetric comparison around disrupted Diff_any vs. Static-boundary bins. For each disrupted boundary bin in each cohort, constrained genes (LOEUF < 0.35) within ±250, ±500 and ±1,000 kb of the bin midpoint were enumerated under identical filters and the same B′ covariate framework as the primary analysis; the only difference between Diff_any and Static branches is which anchor class’s disrupted bin is used as the proximity origin. This analysis is anchor-class-symmetric and avoids any TAD architecture-dependent domain reconstruction. The results are shown in Supplementary Table 6, Panel I and Supplementary Fig. 2 (Group E). (ii) Static-bounded domain reconstruction. Domains were reconstructed using consecutive Static anchor pairs (n = 62,150) and analysed with the same downstream pipeline as the Diff_any-bounded primary. Static anchors are ≈12.5-fold denser than Diff_any anchors (n = 4,980), producing Static-bounded domains with a mean size of ≈50 kb (median ≈30 kb), ≈14-fold smaller than Diff_any-bounded domains (mean 697 kb, median 450 kb). This analysis does NOT constitute a scale-matched null control; it is reported transparently in Supplementary Table 6, Panel J for completeness, with the matched-scale anchor-symmetric distance-based analysis (i) serving as the symmetric comparison framework for domain-definition dependence. (iii) Cohort-composition robustness. The WGS Discovery 95% confidence interval (β = 0.144, 95% CI [–0.077, 0.366]; OR 95% CI [0.93, 1.44]) fully contains the external two-cohort IVW meta β (=0.306), and the WGS–external Wald difference is not significant (Δβ = –0.16, two-sided P = 0.30). Post-hoc power for the WGS Discovery analysis, assuming the external two-cohort IVW meta β (=0.31) as the true effect and using the observed WGS SE (=0.11), was ≈77% at α = 0.05 two-sided by a Wald Z-test approximation; approximately 9,500 analytic samples would be required for 80% power at the assumed true effect. The results are shown in Supplementary Table 6, Panel K. These analyses are reported in Supplementary Table 6, Panels I–K and are not used to redefine the primary three-cohort IVW summary estimate.

**12.14. Halvorsen 40-kb TAD-boundary comparator using parallel adult and foetal cortical boundary analyses.** To benchmark our cell-type-differential boundary findings against bulk cortical Hi-C TAD references, we used the 40-kb TAD-boundary annotation published by Halvorsen et al.2 (TAD bins derived from Giusti-Rodríguez/Sullivan cortical Hi-C data30) directly. The annotation provides genome-wide 40-kb fixed-width bins together with per-bin labels indicating whether each bin was observed as a TAD boundary in adult cortex Hi-C, in foetal cortex Hi-C or both, along with bin-level quality flags (low-quality, centromeric, blacklisted). After excluding low-quality, centromeric and blacklisted bins and restricting to autosomes, the remaining 3,118 bins were partitioned in parallel by tissue: 1,949 bins annotated as adult cortical boundaries and 1,794 as foetal cortical boundaries in hg19 (bins observed in both tissues contribute to both analyses). Each tissue-specific bin set was lifted over from hg19 to GRCh38 using UCSC liftOver (chain hg19ToHg38.over.chain), retaining n = 1,948 adult and n = 1,792 foetal boundary bins post-liftOver; chrX and nonstandard contigs were excluded for consistency with the autosomal CNV analyses.

Rare Pattern A CNV events (frequency < 0.1%, NAHR-excluded) from the primary cohort were intersected separately with the adult and foetal boundary-bin sets using BEDTools (intersect -u, any overlap). Per-sample DEL and DUP counts of boundary-overlapping CNV events were tested under an SV-type-specific gene-overlap-adjusted B′ covariate framework matched to the primary cell-type-resolved boundary analysis (Section 12.3), with DEL and DUP fitted separately and run independently for adult and foetal boundary sets: DEL, case ~ event_count + Sex_numeric + PC1–PC10 + log1p(total_del_bases) + log1p(total_gene_DEL); DUP, case ~ event_count + Sex_numeric + PC1–PC10 + log1p(total_dup_bases) + log1p(total_gene_DUP). This yielded eight binary tests: {adult, foetal} × {DEL, DUP} × {ASD vs. Controls, SZ vs. Controls}. ASD–SZ heterogeneity was assessed by multinomial logistic regression with Controls = 0 baseline / ASD = 1 / SZ = 2 and a Wald test of δ = β_ASD – β_SZ derived from the joint covariance matrix, parallel to Section 12.7, separately for each of the four {adult, foetal} × {DEL, DUP} combinations (four heterogeneity tests). High-burden samples flagged in the primary QC (is_high_burden_sample = 1) were excluded. Two-sided Wald P-values are reported. Results for all 12 tests are reported in Supplementary Table 6, Panel M.

**13. Statistical inference, multiple testing and reporting conventions**

We used two-sided tests across regression modules. The main exception was the external replication analysis (Section 12.8), where pre-specified one-sided tests were applied to the nine discovery-positive boundary classes (testing the same direction as discovery), while the discovery-non-significant class and negative controls, where evaluated, were assessed using two-sided tests. For the constraint-enrichment analysis (Section 12.12), the primary summary estimate was the fixed-effect three-cohort IVW meta-analysis using two-sided inference. Logistic regression effect sizes are reported as ORs with 95% confidence intervals; Poisson regression effect sizes are reported as incidence rate ratios with 95% confidence intervals. For sparse event settings (rare PTV/CNV), Firth bias-reduced logistic regression was used as the primary inferential model with Fisher’s exact test as a reference, and BH-FDR was applied within pre-specified families14-16. For TRE outlier burden, primary inference emphasized carriage of at least one rare TRE outlier as the cross-tool end-point under cross-fitting; per-individual outlier count models were treated as secondary.

**Exploratory sex-stratified and sex interaction sensitivity analyses.** Exploratory sex-stratified and sex × case interaction analyses were performed for the two primary WGS-accessible end-points: rare TRE outlier carriage and aggregate Diff_any-DEL burden. For TRE, analyses were conducted separately for EHdn and STRling carriage end-points using the same cross-fitted rare-outlier definitions as the primary analysis; sex-stratified TRE models omitted the sex covariate and retained sequencing depth and PC1–PC10, and pooled interaction models used the primary TRE carriage covariate framework with an added sex × case interaction term. For TAD, analyses used the primary aggregate Diff_any-DEL B′ covariate framework; sex-stratified TAD models omitted the sex covariate, and pooled interaction models evaluated a Diff_any-DEL × sex interaction term. These analyses were exploratory, were not included in the primary multiple-testing families and were interpreted descriptively because carrier counts, particularly among female ASD cases, were limited. The results are provided in Supplementary Table 2, Panel B and Supplementary Table 5, Panel F.

**14. Software and resources**

Key tools and resources included CNVkit8, AnnotSV9, PRS-CSx24, PLINK231, ExpansionHunter Denovo17, STRling18, gnomAD constraint metrics13 and MANE Select transcripts12. For functional interpretation of noncoding variation, we referenced foetal/developmental brain chromatin interaction and boundary-disruption frameworks1, 2, 32 and used the Heffel developmental boundary atlas3.

**15. Use of large language models**

The authors used ChatGPT (OpenAI) and Claude (Anthropic) to assist in drafting and debugging computational scripts used in the genome-data analysis pipelines, including scripts that produced figures and supplementary tables, and to obtain structural feedback on the clarity and organization of the manuscript text. All AI-assisted code was independently executed, inspected and validated by the authors, and all AI-assisted textual suggestions were reviewed and revised by the authors. No figures, images or self-contained sections of the manuscript were generated autonomously by AI tools; figures and tables were produced by author-verified code applied to the authors’ own data. The authors take full responsibility for the content of this work.

**Supplementary Figures**

**Supplementary Fig. 1 | Long-read support assessment of rare TRE outlier loci.** Representative IGV screenshots illustrating motif-concordance support for rare TRE outlier calls detected by the short-read cross-fitting pipeline. **a,b,** PacBio HiFi examples. **c,d,** Oxford Nanopore Technologies (ONT) PromethION examples. a, Sample_887, chr12:103,839,943–103,841,393 (AGATG motif; EHdn Z = 38.04). b, Sample_898, chr20:19,662,590–19,663,956 (AGG motif; EHdn Z = 5.04). c, Sample_776, chr17:80,664,123–80,665,453 (AAGGG motif; detected by both EHdn and STRling; EHdn Z = 46.69; STRling Z = 46.00), showing motif-concordant ONT support in an SZ proband. d, Sample_849, chr7:103,989,712–103,989,713 (CCG motif; STRling Z = 13.00), showing motif-concordant ONT support in an ASD proband. In each panel, the upper track shows coverage and the lower track shows individual long-read alignments, with coloured segments indicating repeat-derived inserted or soft-clipped sequences. These examples illustrate the IGV-based motif-concordance support assessment, which was applied uniformly across PacBio HiFi and ONT PromethION. Across all evaluated loci, 73 of 82 short-read rare TRE outlier calls were long-read supported (PacBio 6/6, 100%; ONT 67/76, 88.2%; combined 89.0%). See Supplementary Table 4 for full per-locus results.

**
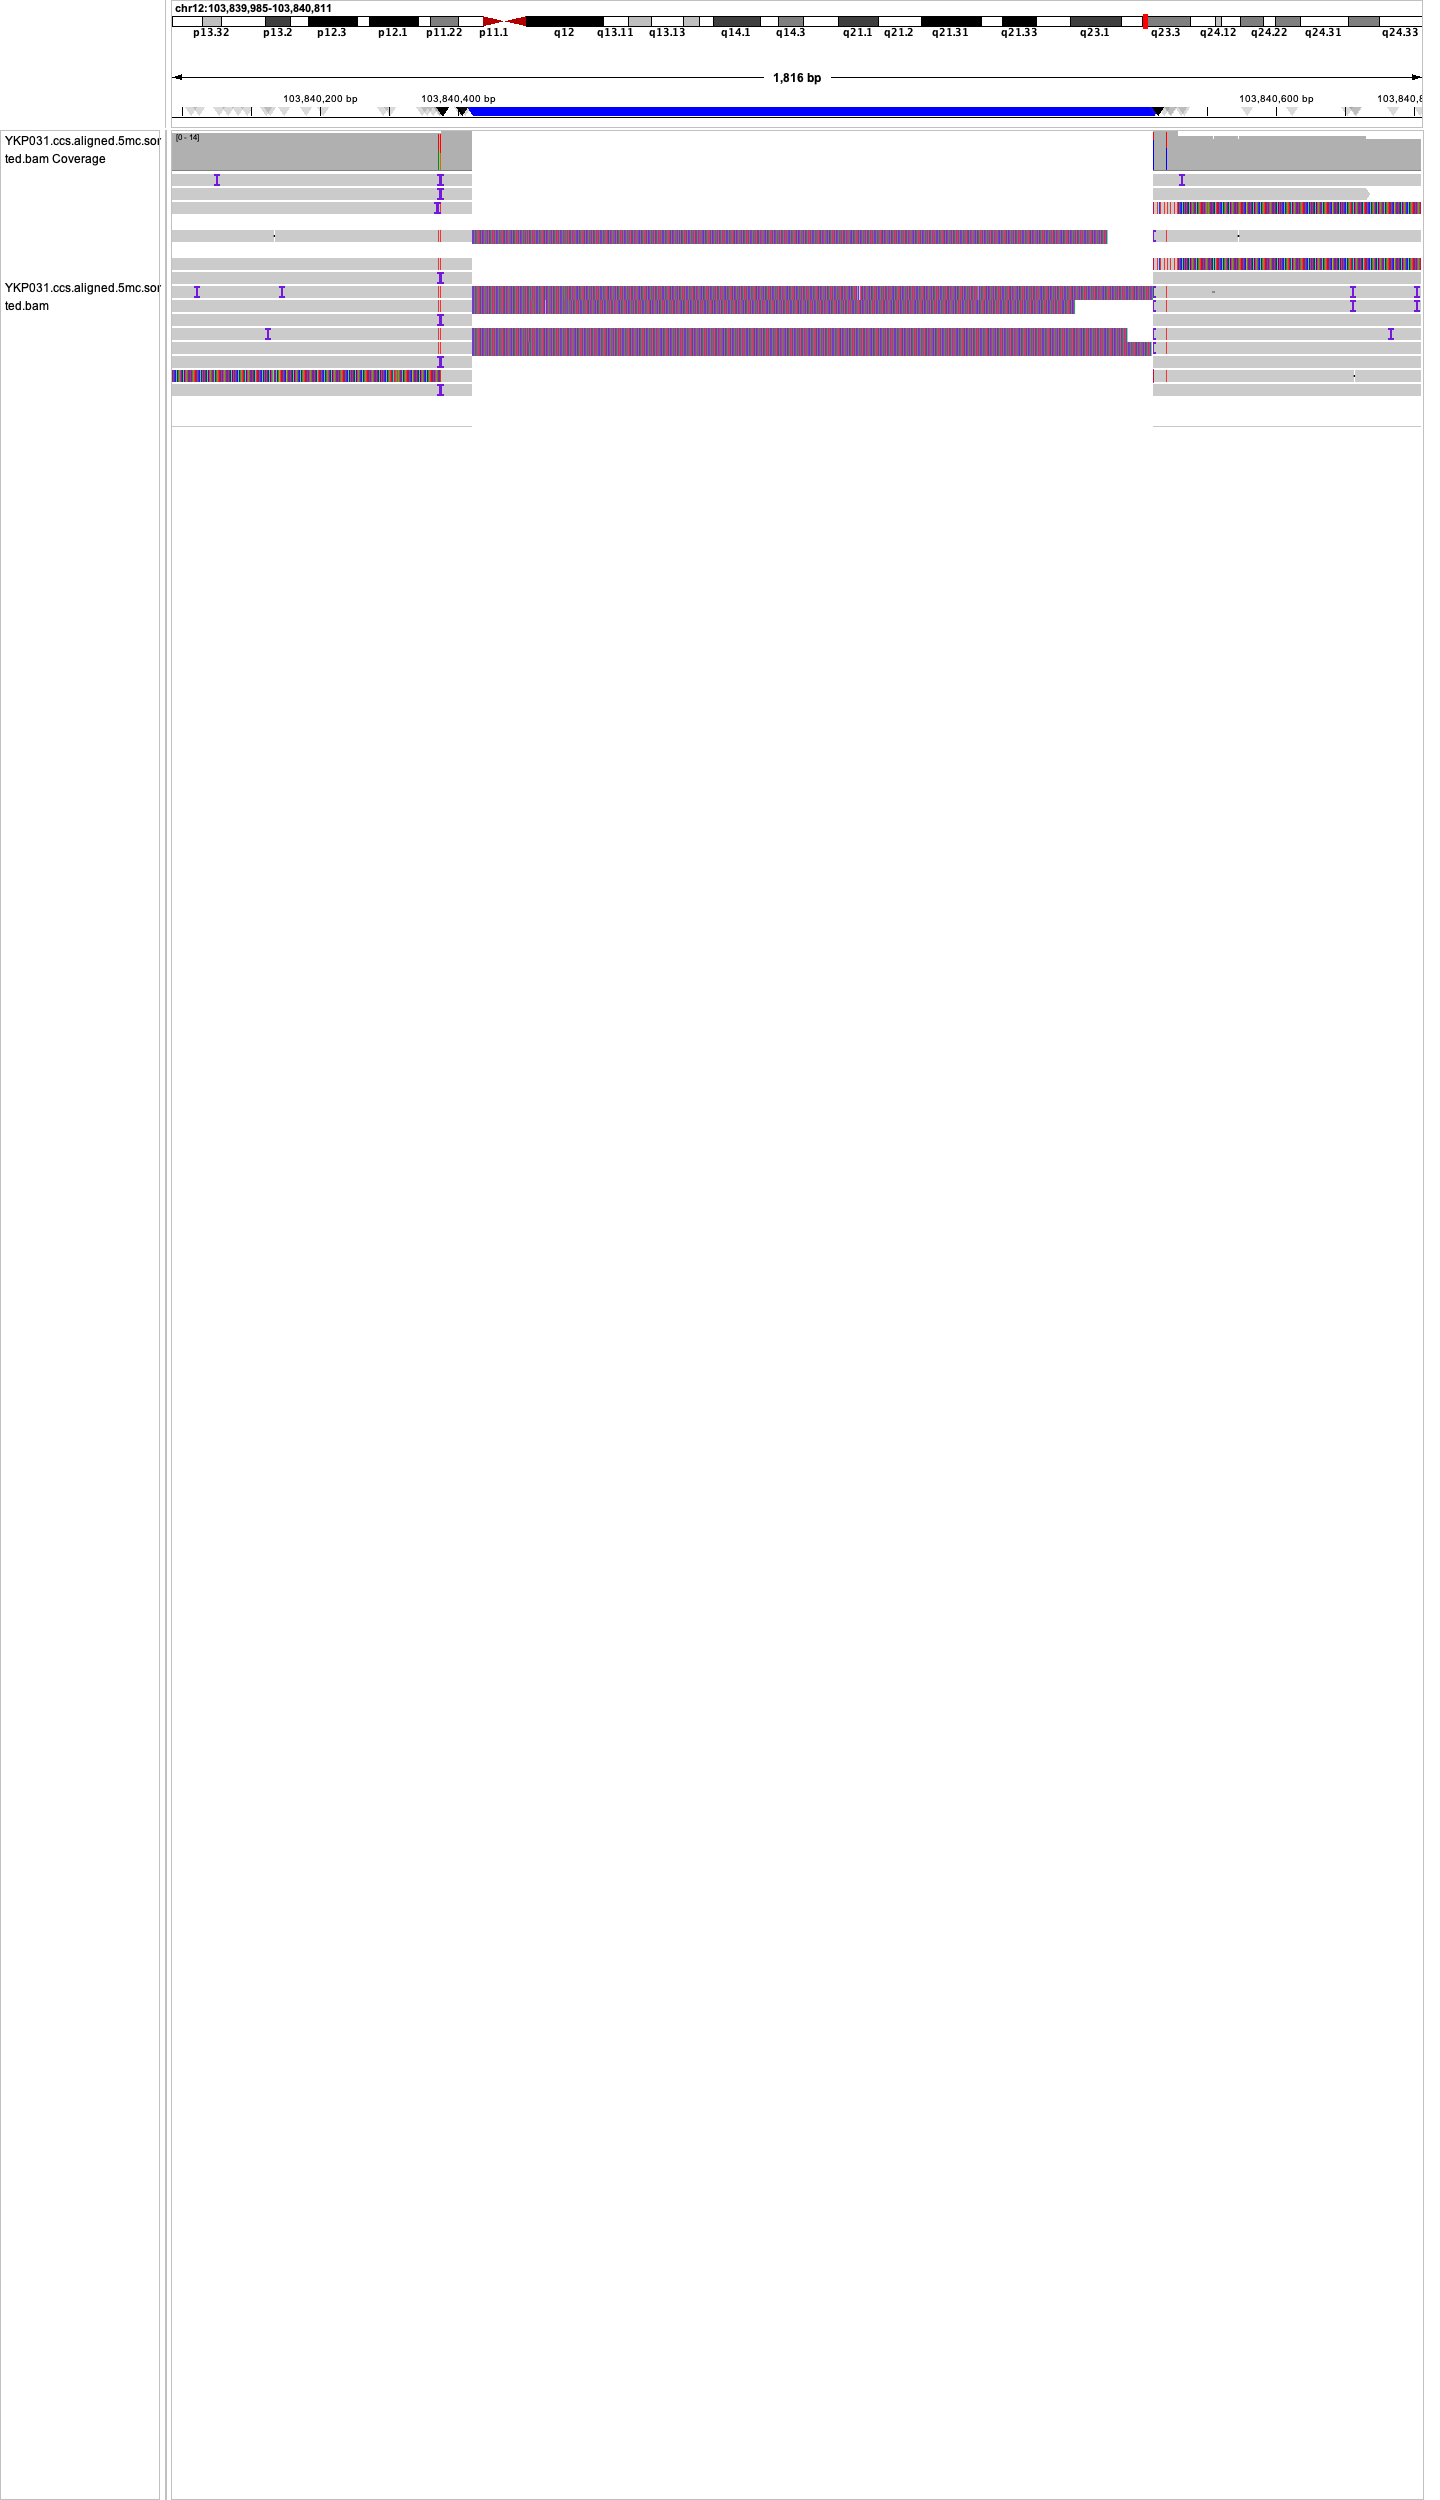
(a)**


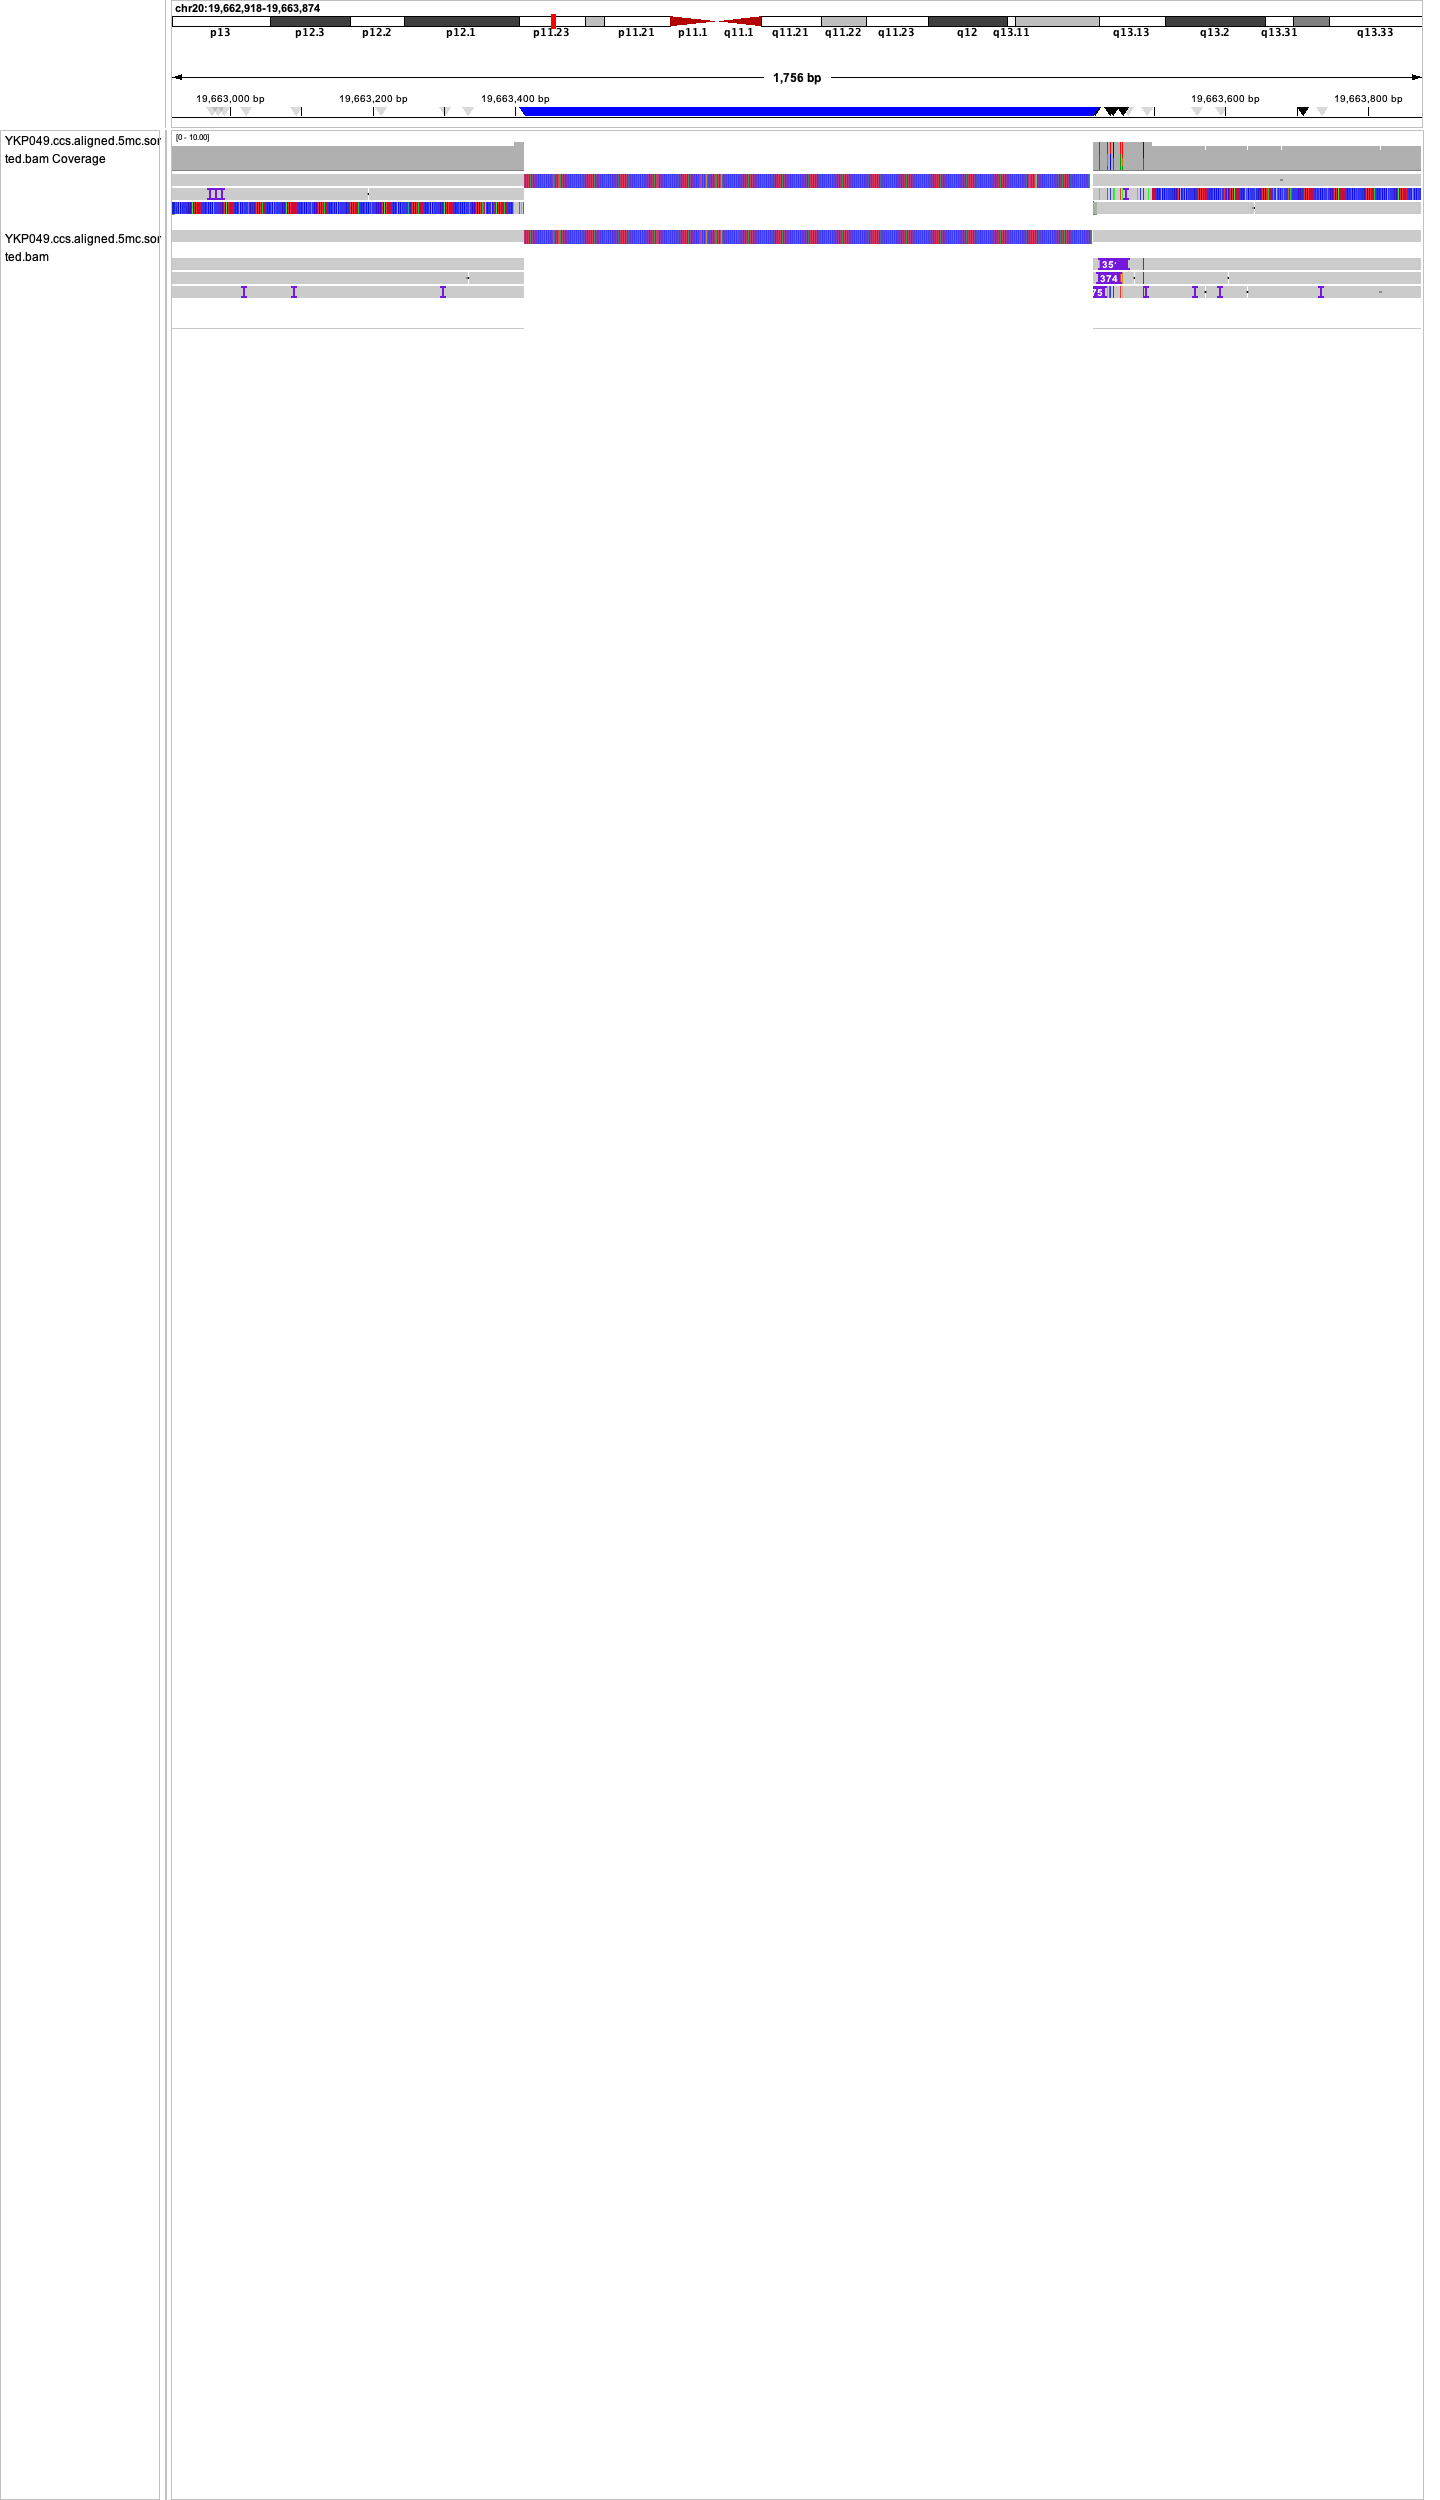
**(b)**

**(c)**

**
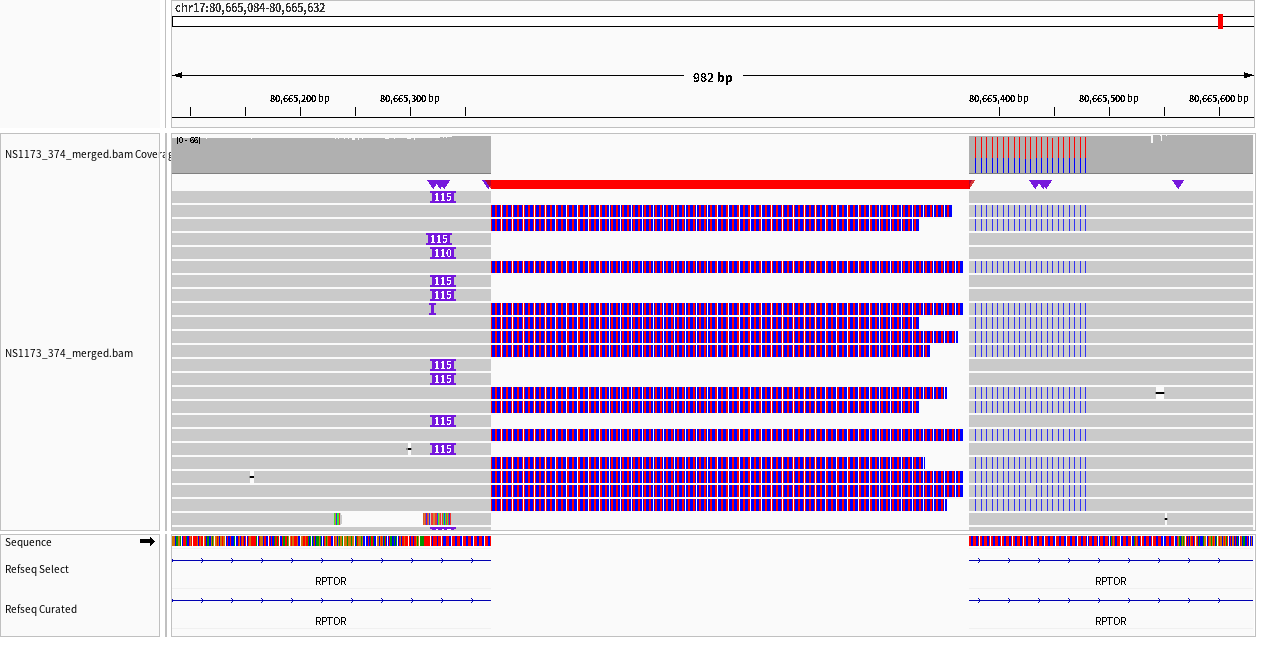
**

**(d)**


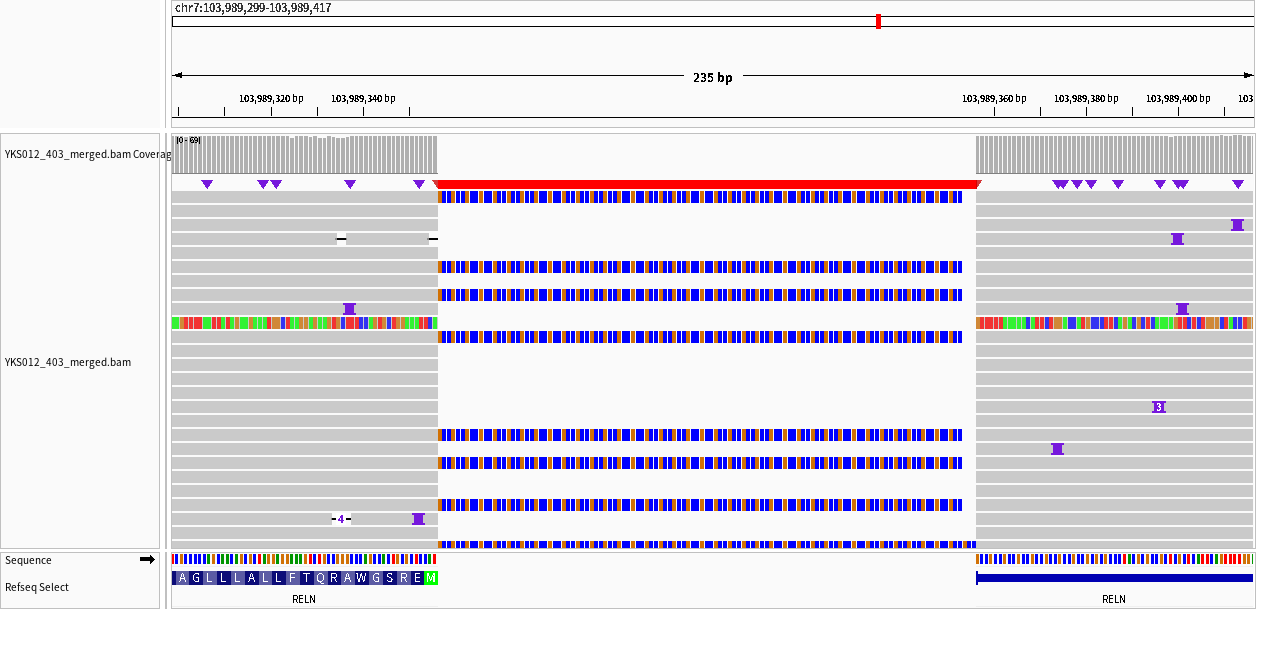


**Supplementary Fig. 2 | Constraint enrichment at Diff_any-bounded TAD-scale regulatory domains: full sensitivity panel.** Forest plots and grouped sensitivity analyses for the cell-type-resolved constraint-enrichment analysis at Diff_any-bounded TAD-scale regulatory domains. Constrained genes were defined as gnomAD v2.1.1 LOEUF < 0.35 (primary threshold) in flanking Diff_any-bounded TAD-scale regulatory domains (3,718 domains; mean 697 kb; median 450 kb). Group A, cohort-level component estimates and the primary fixed-effect three-cohort inverse-variance-weighted (IVW) summary combining WGS Discovery, arrayCGH within-array IVW and MSSNG GEE estimates, with the independent external two-cohort IVW estimate shown as a reference. Group B, exact direct-overlap exclusion sensitivity, in which flanking-domain protein-coding genes directly overlapped by the same deletion were removed. Group C, boundary-proximal Diff_any-anchor sensitivity in the external two-cohort IVW framework at ±250, ±500 and ±1,000 kb windows. Group D, constraint cut-off sensitivities using LOEUF < 0.6 and pLI > 0.9. Group E, distance-symmetric Diff_any-vs-Static boundary-overlap proximity analysis at ±250, ±500 and ±1,000 kb windows under the same B′ covariate framework, reported descriptively and not used to redefine the primary three-cohort IVW estimate. The B′ covariate framework adjusts for sex, PC1–PC10, log1p_total_del_bases, log1p_total_gene_DEL, cohort-specific covariates where applicable and unconstrained known genes within the same flanking Diff_any-bounded domains. Numerical estimates corresponding to the figure groups are reported in Supplementary Table 6, Panels G–I; additional related Static-boundary and cohort-composition robustness analyses are reported in Supplementary Table 6, Panels J and K. All P-values are two-sided unless explicitly noted.

**

**

**Supplementary Fig. 3 | De novo SNV/indel carrier rates in ASD-vs-SZ.** Carrier rates (proportion of individuals carrying ≥1 qualifying de novo variant) in three pre-specified neuropsychiatric risk-gene sets for ASD (n = 376) and SZ (n = 293); sample sizes reflect one proband per family (when multiple probands from the same pedigree were sequenced) plus standard genotyping QC (joint-call quality and ancestry) for the de novo analysis subset (see Supplementary Methods). De novo variants were identified using a trio-based calling pipeline (see Supplementary Methods) and filtered without pathogenicity score restriction (no-score). No pairwise comparison between ASD and SZ reached significance after FDR correction in the primary no-score analysis (see Supplementary Table 7, Panel C for the full results, including sensitivity analyses with pathogenicity score restriction).


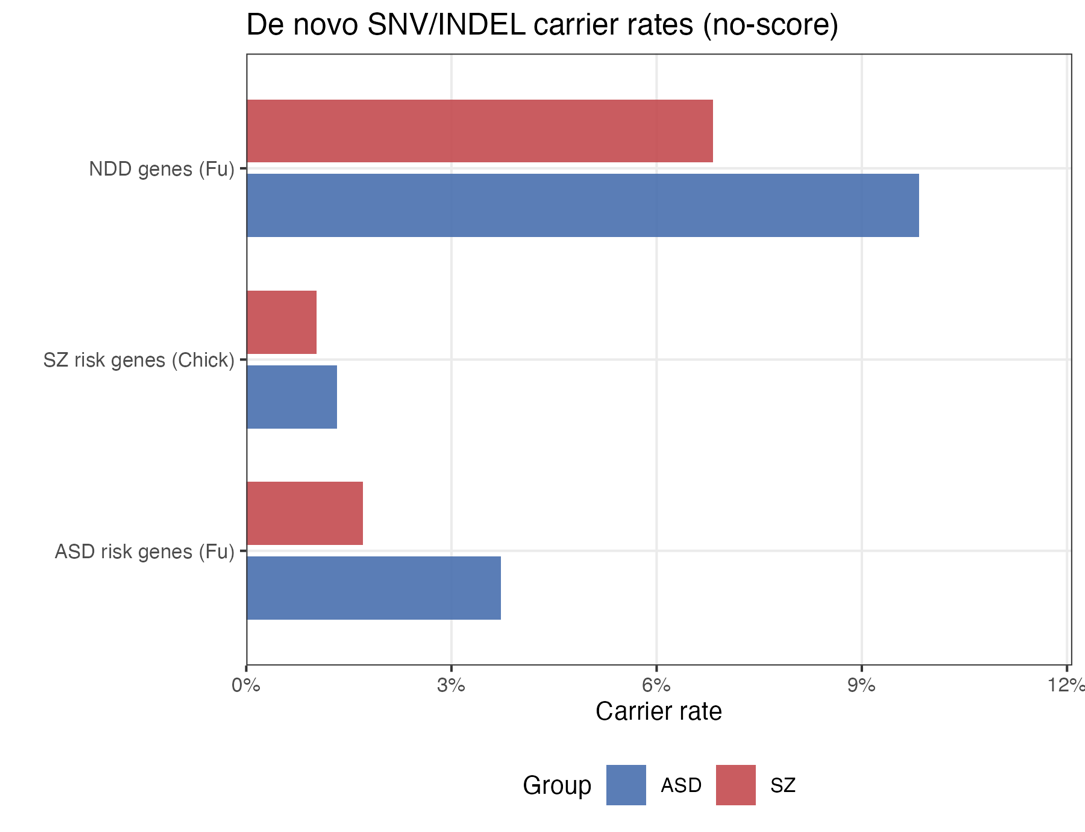



**Supplementary Fig. 4 | Gene discovery integration for ASD and SZ.** a, Manhattan-style display of ASD TADA-based gene discovery results integrating external and study-specific de novo SNV/indel and CNV evidence, plotted by chromosome for all 18,128 assessed genes. The y-axis shows log10(Bayes factor). Genes reaching FDR ≤ 0.001 (n = 98) and FDR ≤ 0.05 (n = 267 total, inclusive of the 98 genes at FDR ≤ 0.001) are highlighted, with representative high-confidence ASD/NDD genes labelled. Horizontal dashed lines indicate the BF thresholds corresponding to FDR = 0.05 and FDR = 0.001. Full ASD TADA results are provided in Supplementary Table 8, and variant-class evidence decomposition is shown in Supplementary Fig. 5. b, Manhattan-style display of SZ rare-coding meta-analysis results after adding the Japanese WGS case–control and de novo strata to the Chick et al. framework. The y-axis shows –log10(meta-analysis P-value). Bonferroni-significant genes (n = 15) and FDR < 0.05 genes (n = 30 total, inclusive of the 15 Bonferroni-significant genes) are highlighted; JPN-driven genes (this study) are shown as green diamonds, including ZMYM2 promoted to exome-wide significance (meta P = 2.43 × 10–9) and three new FDR-significant genes (RANBP9, AMPH, SREK1). The full SZ gene-level results are provided in Supplementary Table 9.

**Supplementary Fig. 5 | Evidence by variant class for ASD high-confidence genes.** Stacked horizontal bar chart showing the decomposition of TADA-Annotations Bayes Factors (Fu et al. framework) by variant class—protein-truncating variants (PTVs), missense class B and missense class A (stratified by MPC score under the TADA-A convention) and SVs (deletions and duplications)—for the top 20 ASD high-confidence genes ranked by total log10(Bayes factor), drawn from the FDR ≤ 0.001 set (n = 98) shown in Supplementary Fig. 4a. PTVs constitute the dominant evidence class for most genes (e.g. SCN2A, CHD8, SYNGAP1, ADNP), while SVs contribute substantially to SHANK3, CHD2, FOXP1, NRXN1 and ARID1B. Full per-class BF decomposition for all 267 FDR ≤ 0.05 genes is provided in Supplementary Table 8.


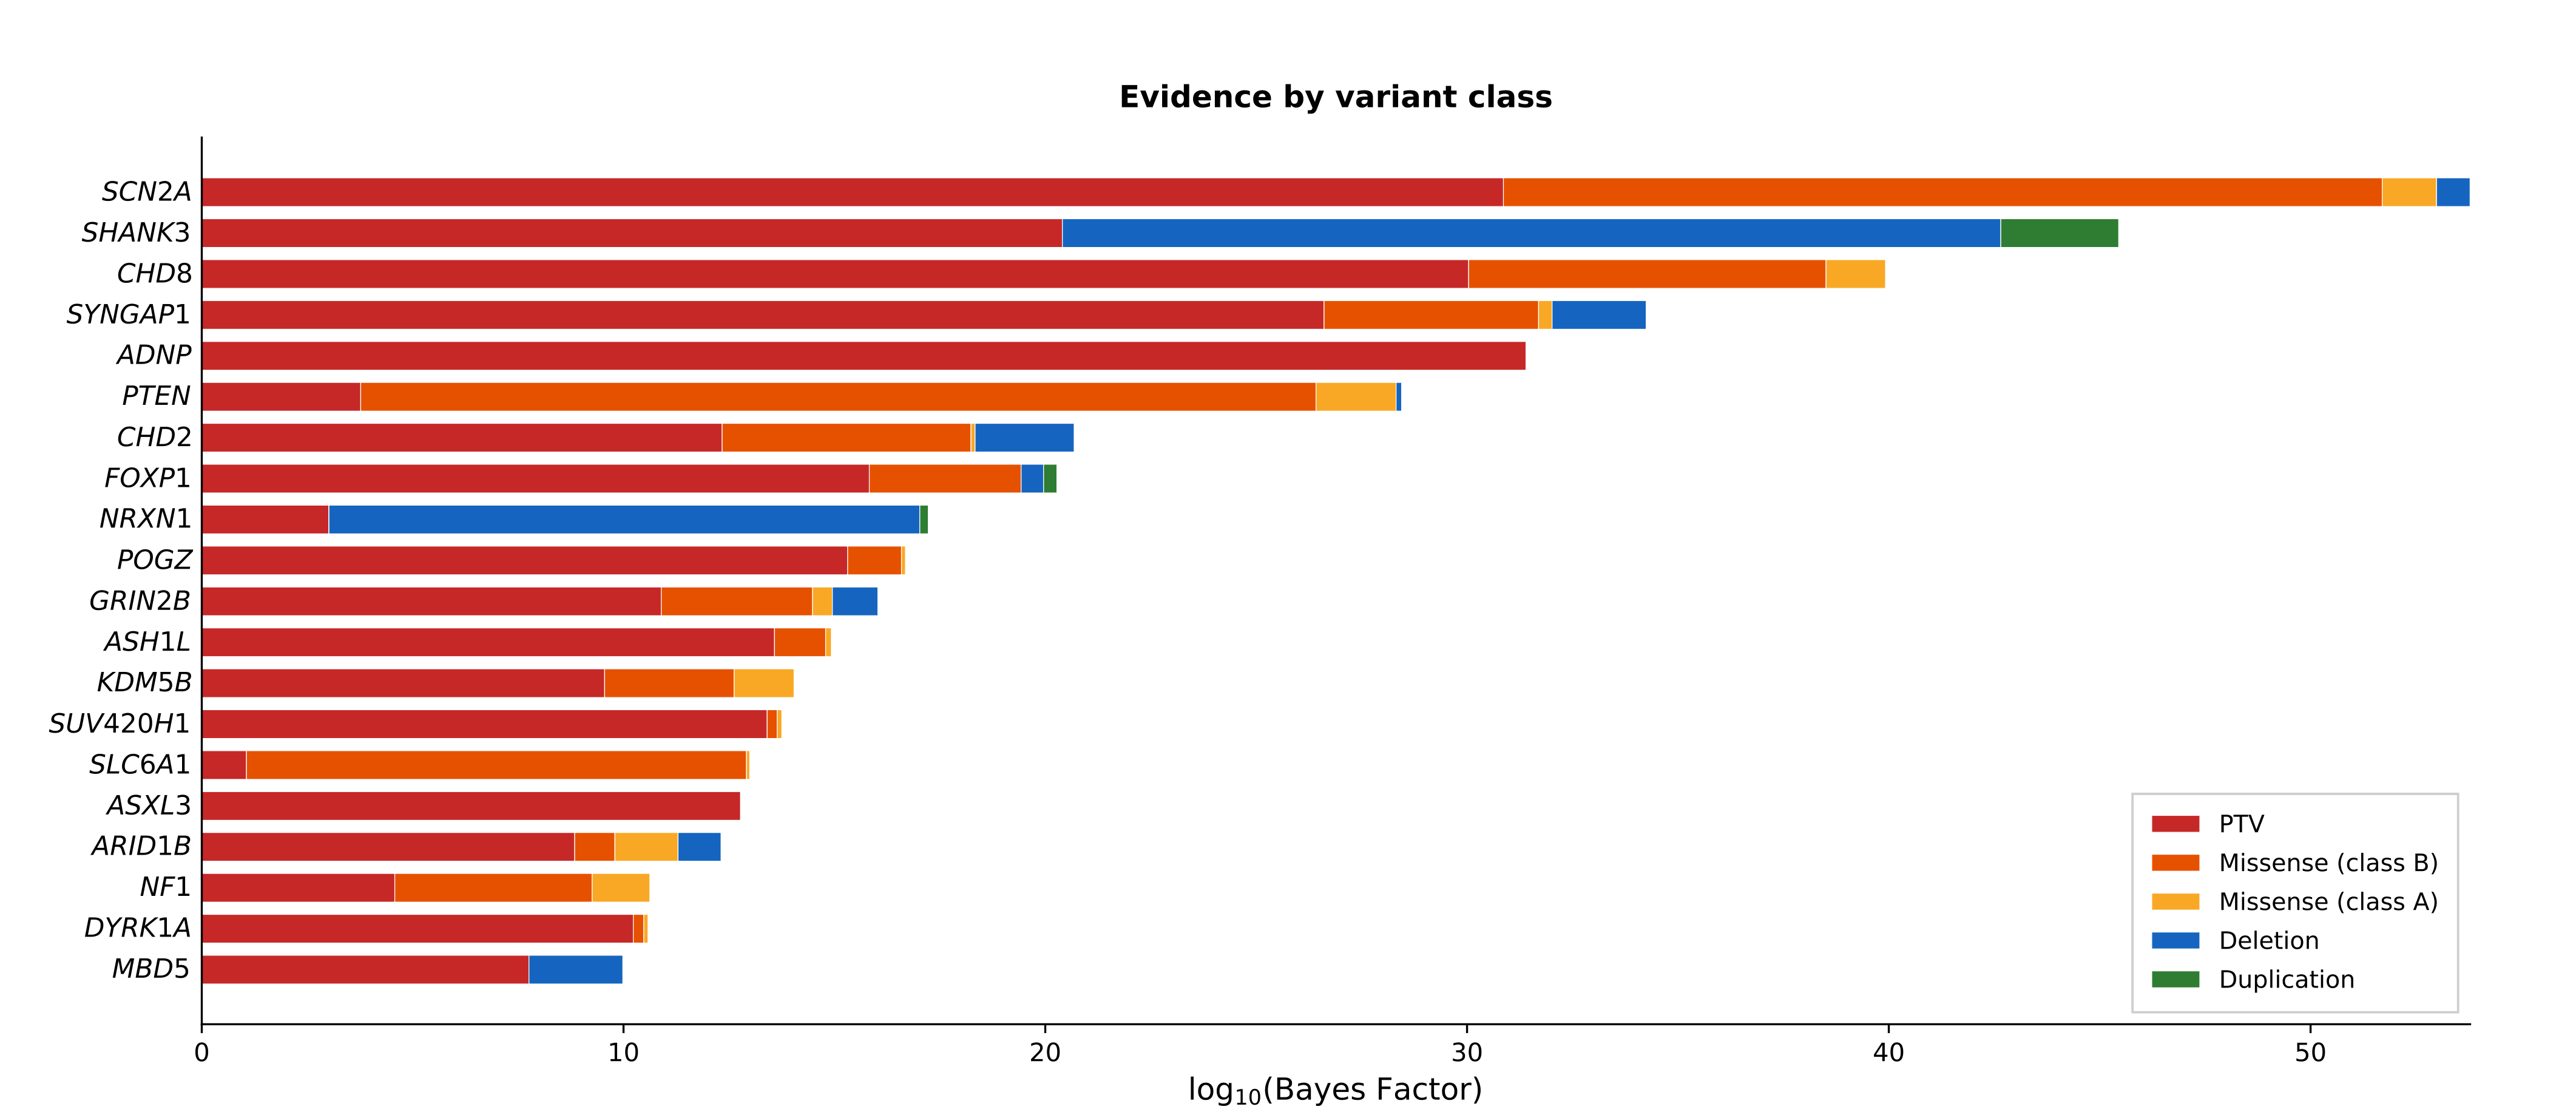


**Supplementary Fig. 6 | PRS portability across psychiatric disorders.** PRS portability for SZ and ASD evaluated in the same Japanese cohort (SZ: Controls 8,442, SZ 634; ASD: Controls 8,442, ASD 508). Discovery genome-wide association study (GWAS) summary statistics: SZ, PGC3 wave3 EUR + EAS (N ≈ 155,000); ASD, iPSYCH/PGC EUR-only (N ≈ 46,000). a, PRS score distributions for SZ (left) and ASD (right) in cases vs. controls. SZ PRS shows a clear upward shift in cases, whereas ASD PRS distributions overlap. Significance annotations correspond to covariate-adjusted PRS association tests in Supplementary Table 10 (***P < 0.001; ns, not significant). b, Improvement in predictive accuracy. ΔR² and ΔAUC compare the full model (PRS + sex + PC1–PC10) with the base model (sex + PC1–PC10). SZ PRS provides substantial predictive gain (ΔR² = 0.062; ΔAUC = 0.111), whereas ASD PRS adds negligible information. c, Decile-based risk stratification for SZ PRS. Odds ratios relative to the lowest decile show a strong monotonic dose–response relationship (top decile OR = 7.31, P = 1.64 × 10–18). d, Decile-based risk stratification for ASD PRS. No significant risk gradient is observed (top decile OR = 1.26, P = 0.30), highlighting the critical dependence of PRS portability on discovery GWAS ancestry composition and sample size. Numbers in parentheses below deciles indicate case counts. Full statistics are provided in Supplementary Table 10.


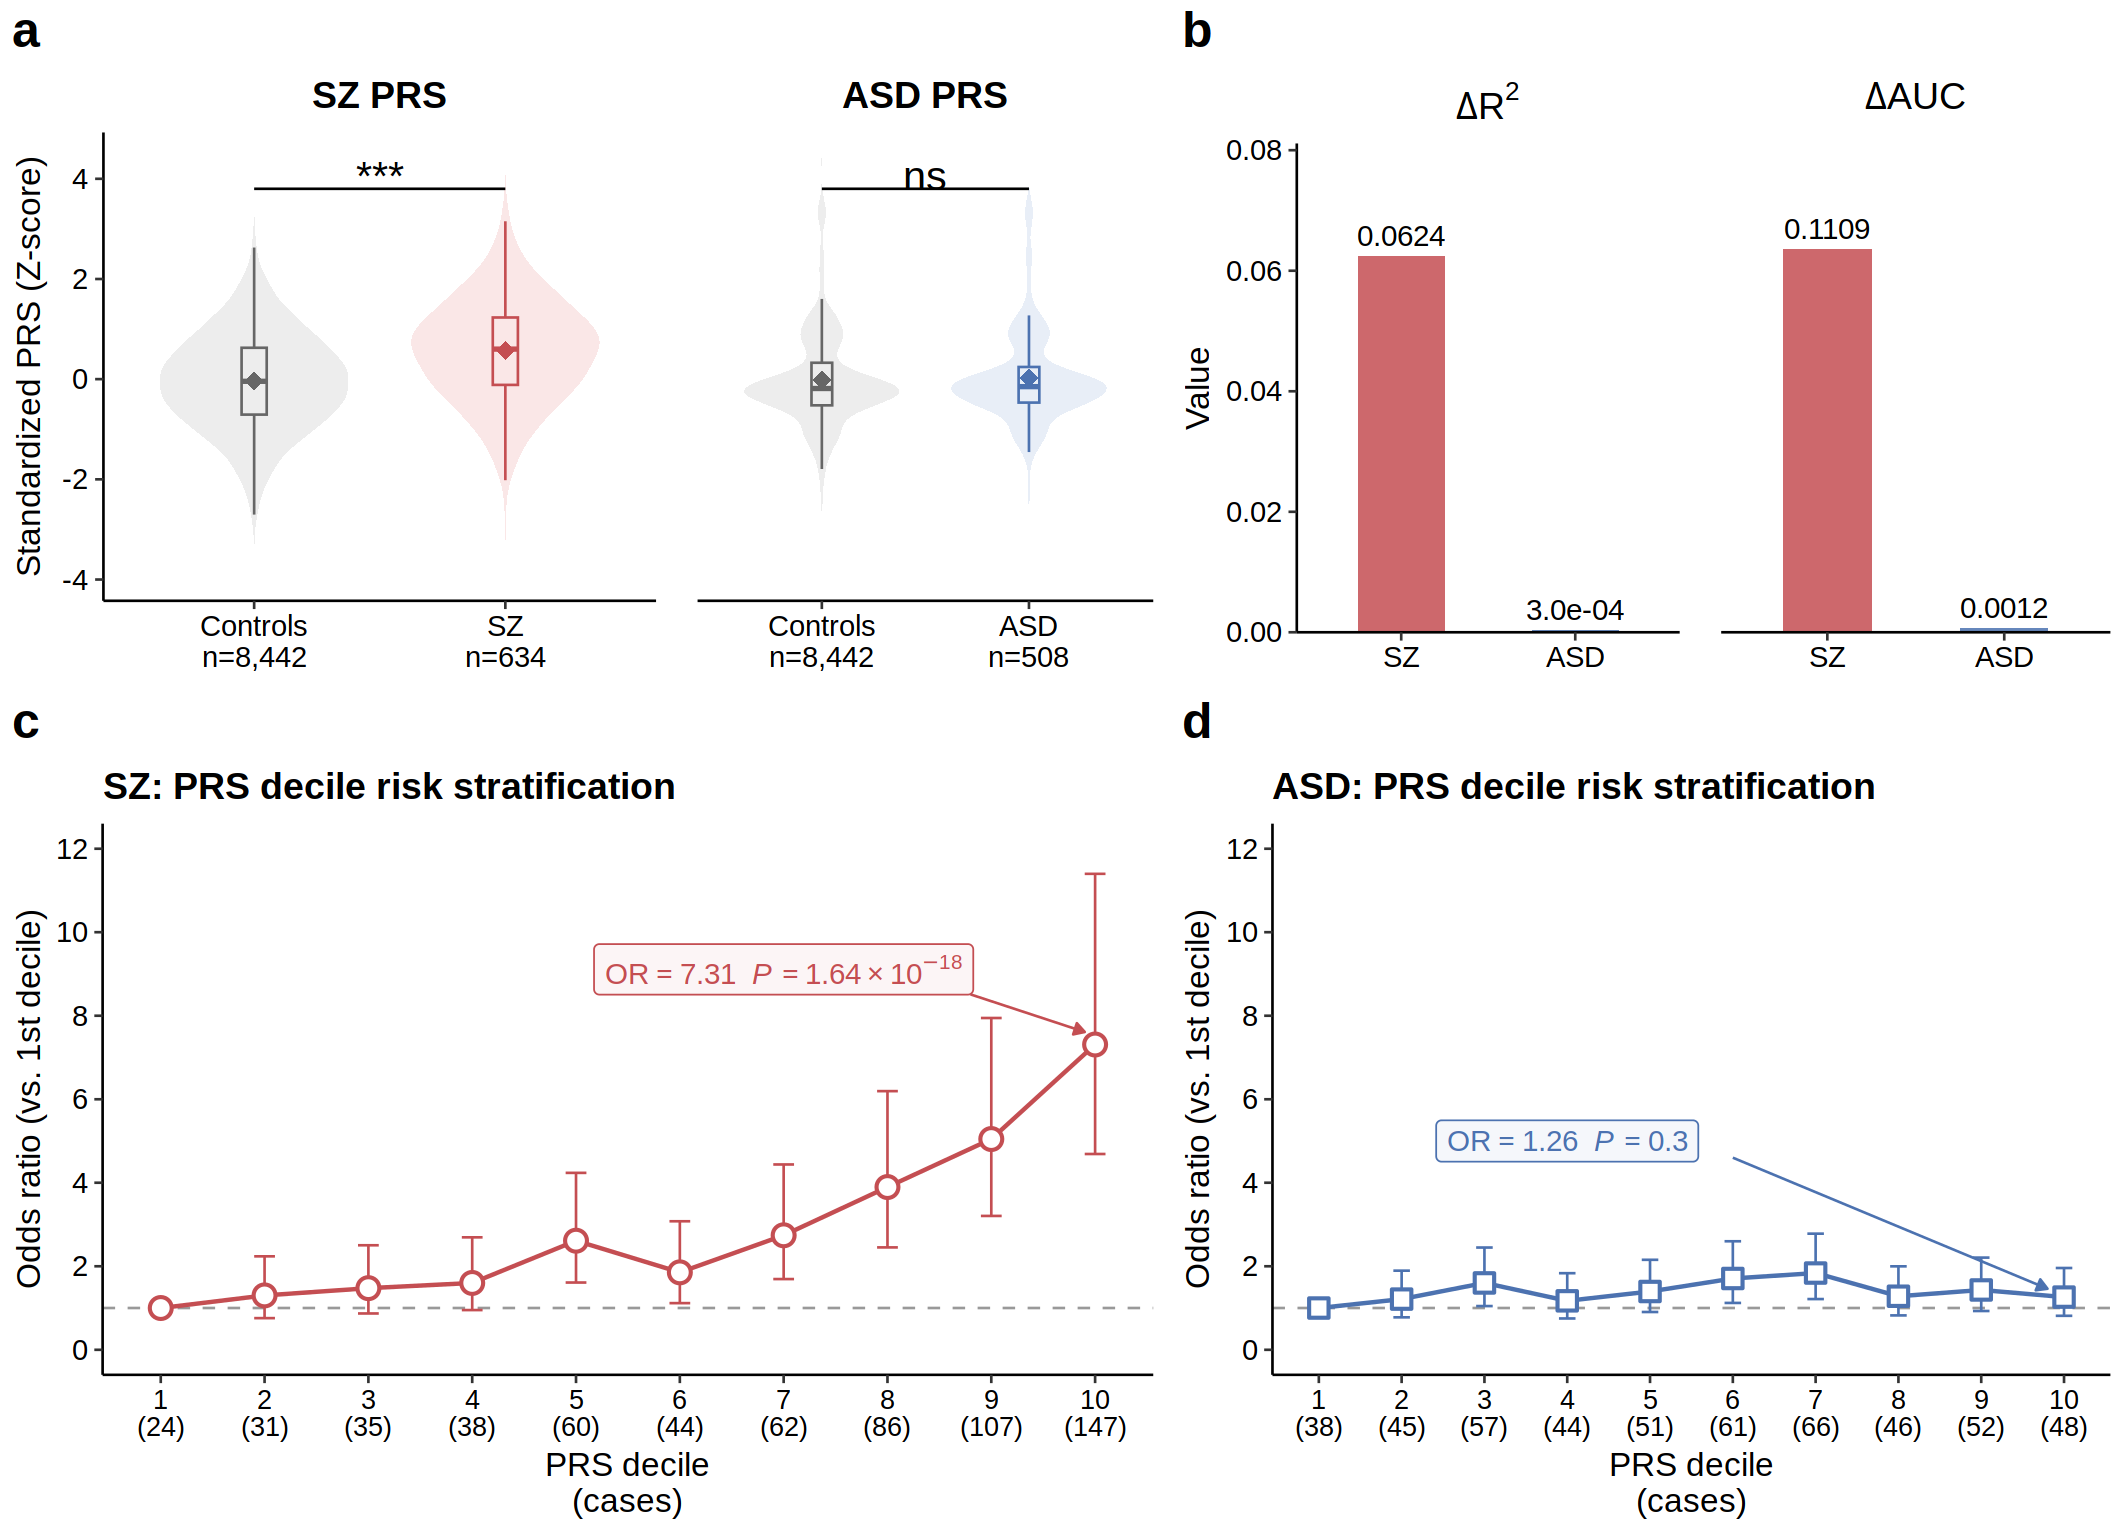


**Supplementary Tables**

*Large multi-panel Supplementary Tables 5–9 and 11 are provided as separate Excel files; concise legends are included in the Supplementary Information for orientation.*

**Supplementary Table 1 | Analysis specification table for core and contextual analysis modules.** Summary of sample sizes, variant classes, statistical tests, multiple-testing correction procedures, primary and sensitivity model specifications and corresponding figure/table references for each core and contextual analysis module.

| **Analysis Module** | **Sample Size (Cases / Controls)** | **Variant Class** | **Primary Statistical Test** | **Multiple-Testing Correction** | **Primary Model Specification** | **Sensitivity Models** | **Main Figure / Table** | **Supp Section / Figure / Table** |
| --- | --- | --- | --- | --- | --- | --- | --- | --- |
| TRE burden | ASD 508 / SZ 634 / Controls 8,442 | Rare TRE outliers (EHdn + STRling) | Logistic regression for carriage OR (primary); Poisson regression for count RR (secondary) | BH-FDR within caller × exposure | Carriage ~ Dx + Depth + Sex + PC1–10 | Cross-fitting; negative controls | Fig. 2 | Supp Methods 8; Supp Tables 2–4; Supp Fig. 1 |
| Cell-type-resolved TAD-boundary SV-burden | ASD 505 / SZ 627 / Controls 8,372 | Rare DEL/DUP (≥25 kb) | B′ logistic regression; external IVW replication; MNLogit for ASD-vs-SZ heterogeneity | BH-FDR within comparison × SV type | Model B′: case ~ event_count + Sex + PC1–PC10 + log1p(total_DEL/DUP_bases) + log1p(total_gene_DEL/DUP) | Pattern B/C; matched-static resampling; Diff_any vs. Static per-bin specificity; two-test exon-exclusion; ASD-vs-SZ aggregate contrast; aggregate-signal robustness (standard/strict LOCO + top-N sample/event exclusion);Halvorsen adult/foetal cortical boundary parallel comparator; constraint-domain enrichment (three-cohort IVW); joint-layer integration (see Joint-layer integration row) | Fig. 3 | Supp Methods §12.1–12.14; Supp Tables 5, 6; Supp Fig. 2 (joint-layer module: see Joint-layer integration row) |
| Rare coding/CNV burden | PTV: ASD 508 / SZ 634 / controls 8,442 CNV: ASD 505 / SZ 627 / controls 8,372 | Rare PTV, rare exonic risk-gene DEL, NAHR-mediated genomic disorder CNV | Firth logistic regression | BH-FDR within gene-set × variant class | Carrier ~ Dx + Sex + PC1–10 | — | Fig. 4 | Supp Methods 7; Supp Table 7 Panels A–B |
| De novo carrier-rate analysis | ASD 376 / SZ 293 | De novo SNV/indel in pre-specified risk-gene sets (ASD-Fu, SZ-Chick, NDD-Fu) | Fisher's exact test (primary); Firth logistic regression (sensitivity) | BH-FDR across pre-specified gene sets | Carrier ~ Dx (Fisher exact 2×2); Carrier ~ Dx + Sex + PC1–10 (Firth sensitivity) | no-score vs. with-score variant definitions | — | Supp Methods 6; Supp Table 7 Panel C; Supp Fig. 3 |
| Gene discovery | Multi-cohort meta-analysis | De novo SNV/indel, inherited, CNV | ASD: Bayesian TADA (Bayes factor); SZ: CMH-based rare-coding meta-analysis (Fisher's combined P with de novo) | BH-FDR | ASD: TADA meta-analysis across external and study-specific de novo SNV/indel and CNV evidence; SZ: Chick et al. framework + Japanese case–control and de novo strata | — |  | Supp Methods 9–10; Supp Tables 8–9; Supp Figs. 4–5 |
| PRS portability | ASD 508 / SZ 634 / Controls 8,442 | Common variants (PRS) | Logistic regression; Nagelkerke R²; AUC; decile analysis | — | Dx ~ PRS + Sex + PC1–10 | EUR-only vs trans-ancestry discovery |  | Supp Methods 11; Supp Table 10; Supp Fig. 6 |
| Joint-layer integration | ASD joint subset N = 8,877; SZ joint subset N = 8,999; multinomial subset N = 9,504 | Diff_any-DEL, TRE, PRS, PTV, exonic CNV, NAHR-CNV; Static-DEL sensitivity | Nested logistic regression; added-last likelihood-ratio test; multinomial Wald contrast for ASD-vs-SZ | Pre-specified integrative sensitivity; no omnibus FDR | Dx ~ Diff_any-DEL + TRE + PRS + PTV + exonic CNV + NAHR-CNV + covariates | STRling-based replication; Static-boundary adjustment; ASD–SZ multinomial contrast | Fig. 5 | Supp Methods §12.13; Supp Table 11 |

**Supplementary Table 2 | Rare genic-proximal TRE outlier burden and exploratory sex-sensitivity analyses.** Panel A: Summary of primary logistic regression carriage analyses and secondary Poisson count analyses for rare TRE outlier burden in ASD and SZ vs. controls, using EHdn and STRling with fivefold cross-fitting. Primary and secondary models adjusted for sequencing depth, sex and ancestry principal components (PC1–PC10). Panel B: Exploratory sex-stratified and sex × case interaction analyses for the primary rare TRE outlier carriage end-point. Sex-stratified models omitted the sex covariate and retained sequencing depth and PC1–PC10; interaction models used the same covariate framework as the primary carriage model with an added sex × case interaction term. These analyses were exploratory and not used for primary inference. OR, odds ratio; RR, rate ratio; CI, confidence interval.

**Panel A. Primary and secondary TRE outlier burden analyses**

| **Caller** | | | **Comparison** | | **End-point** | | **N (case)** | | **N (control)** | | **Prevalence case** | | | **Prevalence control** | | **Effect size (95% CI)** | | **P-value** | | |
| --- | --- | --- | --- | --- | --- | --- | --- | --- | --- | --- | --- | --- | --- | --- | --- | --- | --- | --- | --- | --- |
| EHdn | | | ASD vs. Controls | | Carriage (logistic OR) | | 508 | | 8,442 | | 16.7% | | | 12.4% | | 1.37 (1.07–1.75) | | 1.4 × 10⁻² | | |
| EHdn | | | SZ vs. Controls | | Carriage (logistic OR) | | 634 | | 8,442 | | 18.8% | | | 12.4% | | 1.61 (1.30–1.99) | | 1.0 × 10⁻⁵ | | |
| EHdn | | | ASD vs. Controls | | Counts (Poisson RR) | | 508 | | 8,442 | | — | | | — | | 1.46 (1.17–1.82) | | 7.7 × 10⁻⁴ | | |
| EHdn | | | SZ vs. Controls | | Counts (Poisson RR) | | 634 | | 8,442 | | — | | | — | | 1.72 (1.43–2.06) | | 4.6 × 10⁻⁹ | | |
| STRling | | | ASD vs. Controls | | Carriage (logistic OR) | | 508 | | 8,442 | | 16.7% | | | 12.0% | | 1.38 (1.07–1.77) | | 1.2 × 10⁻² | | |
| STRling | | | SZ vs. Controls | | Carriage (logistic OR) | | 634 | | 8,442 | | 17.0% | | | 12.0% | | 1.46 (1.17–1.82) | | 7.9 × 10⁻⁴ | | |
| STRling | | | ASD vs. Controls | | Counts (Poisson RR) | | 508 | | 8,442 | | — | | | — | | 1.40 (1.13–1.73) | | 2.1 × 10⁻³ | | |
| STRling | | | SZ vs. Controls | | Counts (Poisson RR) | | 634 | | 8,442 | | — | | | — | | 1.51 (1.26–1.81) | | 1.1 × 10⁻⁵ | | |
| **Panel B. Exploratory sex-stratified and sex × case interaction analyses for rare TRE outlier carriage** | | | | | | | | | | | | | | | | | | | | |
| **Caller** | **Comparison** | | **Analysis** | | **Sex stratum** | | **N case** | | **N control** | | **Carrier cases** | **Carrier controls** | | **OR [95% CI]** | | **P-value** | | **Interaction P** | **Note** | | |
| EHdn | ASD vs. Controls | | (A) Sex × case interaction | | Pooled | | 508 | | 8,442 | | 85 | 1,044 | | — | | — | | 0.274 | No sex-differential effect | | |
| EHdn | ASD vs. Controls | | (B) Stratified | | Male | | 377 | | 4,142 | | 67 | 513 | | 1.49 [1.12–1.98] | | 0.006 | | — | Nominally positive in males | | |
| EHdn | ASD vs. Controls | | (C) Stratified | | Female | | 131 | | 4,300 | | 18 | 531 | | 1.02 [0.60–1.71] | | 0.954 | | — | Underpowered (18 carriers) | | |
| EHdn | SZ vs. Controls | | (A) Sex × case interaction | | Pooled | | 634 | | 8,442 | | 119 | 1,044 | | — | | — | | 0.681 | No sex-differential effect | | |
| EHdn | SZ vs. Controls | | (B) Stratified | | Male | | 341 | | 4,142 | | 61 | 513 | | 1.54 [1.15–2.07] | | 0.004 | | — | Nominally positive in males | | |
| EHdn | SZ vs. Controls | | (C) Stratified | | Female | | 293 | | 4,300 | | 58 | 531 | | 1.68 [1.24–2.28] | | 0.0009 | | — | Nominally positive in females | | |
| STRling | ASD vs. Controls | | (A) Sex × case interaction | | Pooled | | 508 | | 8,442 | | 85 | 1,014 | | — | | — | | 0.975 | No sex-differential effect | | |
| STRling | ASD vs. Controls | | (B) Stratified | | Male | | 377 | | 4,142 | | 62 | 492 | | 1.38 [1.03–1.86] | | 0.030 | | — | Nominally positive in males | | |
| STRling | ASD vs. Controls | | (C) Stratified | | Female | | 131 | | 4,300 | | 23 | 522 | | 1.34 [0.83–2.16] | | 0.226 | | — | Underpowered (23 carriers) | | |
| STRling | SZ vs. Controls | | (A) Sex × case interaction | | Pooled | | 634 | | 8,442 | | 108 | 1,014 | | — | | — | | 0.793 | No sex-differential effect | | |
| STRling | SZ vs. Controls | | (B) Stratified | | Male | | 341 | | 4,142 | | 57 | 492 | | 1.49 [1.10–2.02] | | 0.010 | | — | Nominally positive in males | | |
| STRling | SZ vs. Controls | | (C) Stratified | | Female | | 293 | | 4,300 | | 51 | 522 | | 1.40 [1.02–1.94] | | 0.040 | | — | Nominally positive in females | | |

**Supplementary Table 3 | Cross-disorder (ASD vs. SZ) comparison of rare TRE outlier burden.** Panel A: Direct ASD-vs-SZ logistic regression (primary, rare_any), Poisson GLM (secondary, counts) and Mann–Whitney *U* test for each caller. Logistic and Poisson models used the same covariates as the TRE burden models: sequencing depth, sex and PC1–PC10. Panel B: Cochran’s Q heterogeneity test comparing the ASD-vs-control and SZ-vs-control log-ORs; I² = 0% indicates no detectable heterogeneity. Panel C: Sample sizes.

| **Panel A: Direct ASD vs. SZ comparison** | | | | | |
| --- | --- | --- | --- | --- | --- |
| **Tool** | **Test** | **Statistic** | **Value** | **95% CI** | **P-value** |
| EHdn | Logistic regression (rare_any) | OR (SZ vs. ASD) | 1.28 | 0.92–1.77 | 0.14 |
| EHdn | Poisson GLM (count) | RR (SZ vs. ASD) | 1.28 | 0.97–1.70 | 0.079 |
| EHdn | Mann–Whitney U (two-sided) | — | — | — | 0.339 |
| STRling | Logistic regression (rare_any) | OR (SZ vs. ASD) | 1.10 | 0.79–1.53 | 0.58 |
| STRling | Poisson GLM (count) | RR (SZ vs. ASD) | 1.16 | 0.88–1.53 | 0.29 |
| STRling | Mann–Whitney U (two-sided) | — | — | — | 0.838 |
| **Panel B: Heterogeneity of case–control ORs (Cochran’s Q)** | | | | | |
| **Tool** | **OR (ASD vs. Ctrl)** | **OR (SZ vs. Ctrl)** | **Cochran’s Q** | **P-value** | **I²** |
| EHdn | 1.37 | 1.61 | 0.97 | 0.32 | 0.0% |
| STRling | 1.38 | 1.46 | 0.11 | 0.74 | 0.0% |
| **Panel C: Sample sizes** | | | | | |
| **Tool** | **N (ASD)** | **N (SZ)** | **N (Control)** | **N (Total)** | |
| EHdn | 508 | 634 | 8,442 | 9,584 | |
| STRling | 508 | 634 | 8,442 | 9,584 | |

Panel A: Direct comparison of ASD vs. SZ using an IsSZ indicator. OR/RR > 1 indicates higher burden in SZ than ASD. Logistic and Poisson models adjusted for sequencing depth, sex and PC1–PC10. Mann–Whitney U tests were unadjusted two-sided comparisons. One sample per pedigree; complete-case analysis. Panel B: Cochran’s Q tests whether the ASD-vs-control and SZ-vs-control log(OR)s are significantly different. I² = 0% indicates no detectable heterogeneity between disorder-specific effect sizes.

**Supplementary Table 4 | Long-read support assessment of rare TRE outlier loci.** Per-locus long-read support results for rare TRE outlier calls detected by the short-read cross-fitting pipeline (EHdn and/or STRling) in 66 case probands carrying short-read rare TRE outlier calls, sequenced on two independent long-read platforms: six probands on PacBio HiFi and 60 probands on ONT PromethION (33 ASD and 27 SZ for the ONT cohort). For each outlier locus, the table reports the sample ID, diagnosis, genomic coordinates (GRCh38), repeat motif, detection tool(s), cross-fitting Z-score and raw in-repeat read (IRR) counts for EHdn, outlier Z-score and sum_str_counts for STRling (where applicable) and long-read support status (motif-concordance assessment by visual inspection in IGV). The PacBio cohort contributed six evaluated rare TRE outlier calls, all of which (6/6, 100%) had motif-concordant long-read support; two loci (chr7 AAGGT in Sample_1401 and chr9 AACGG in Sample_1426) were independently detected by both EHdn and STRling. The ONT cohort contributed 76 evaluated rare TRE outlier calls after intra-sample deduplication of EHdn and STRling double-counts, 67 (88.2%) of which had motif-concordant long-read support. Combined across both platforms, 73 of 82 (89.0%) evaluated short-read rare TRE outlier calls were long-read supported.

| **Sample ID** | **Diagnosis** | **Chr** | **Cluster start** | **Cluster end** | **Repeat motif** | **Detection tool** | **EHdn Z-score** | **EHdn IRR (raw)** | **STRling Z-score** | **STRling sum_str_counts** | **Long-read support status** |
| --- | --- | --- | --- | --- | --- | --- | --- | --- | --- | --- | --- |
| Sample_887 | ASD | chr12 | 103,839,943 | 103,841,393 | AGATG | EHdn | 38.04 | 15 | N/A | N/A | PacBio Supported |
| Sample_871 | ASD | chr20 | 63,442,372 | 63,444,174 | ACC | EHdn | 5.67 | 12 | N/A | N/A | PacBio Supported |
| Sample_898 | ASD | chr20 | 19,662,590 | 19,663,956 | AGG | EHdn | 5.04 | 24 | N/A | N/A | PacBio Supported |
| Sample_1401 | ASD | chr7 | 72,114,254 | 72,114,949 | AAGGT | Both (EHdn + STRling) | 136.73 | 28 | 56.00 | 617 | PacBio Supported |
| Sample_1426 | ASD | chr9 | 36,971,790 | 36,973,617 | AACGG | Both (EHdn + STRling) | 41.18 | 16 | 43.00 | 113 | PacBio Supported |
| Sample_1452 | ASD | chr11 | 131,788,866 | 131,790,136 | AAGGAG | EHdn | 18.36 | 16 | N/A | N/A | PacBio Supported |
| Sample_2538 | SZ | chr3 | 58,740,115 | 58,740,116 | AGGGTT | STRling | N/A | N/A | 49.00 | 110 | ONT Not supported |
| Sample_2538 | SZ | chr5 | 174,117,409 | 174,119,106 | AAGG | EHdn | 6.29 | 10 | N/A | N/A | ONT Not supported |
| Sample_2424 | SZ | chr14 | 23,279,577 | 23,281,286 | AATAG | EHdn | 69.99 | 11 | N/A | N/A | ONT Supported |
| Sample_2421 | SZ | chrX | 54,116,656 | 54,118,044 | AAATC | Both (EHdn + STRling) | 1566715.02 | 43 | 17.00 | 663 | ONT Supported |
| Sample_2427 | SZ | chrX | 54,116,656 | 54,118,044 | AAATC | Both (EHdn + STRling) | 1228525.23 | 40 | 17.00 | 798 | ONT Supported |
| Sample_2442 | SZ | chr12 | 103,839,943 | 103,841,393 | AGATG | EHdn | 51.30 | 29 | N/A | N/A | ONT Supported |
| Sample_2451 | SZ | chr1 | 28,246,479 | 28,248,045 | AAAG | EHdn | 8.80 | 10 | N/A | N/A | ONT Supported |
| Sample_2514 | SZ | chr4 | 72,549,590 | 72,551,125 | AAGAGG | EHdn | 7.82 | 10 | N/A | N/A | ONT Supported |
| Sample_2464 | SZ | chr4 | 39,347,757 | 39,349,184 | AAGGAG | Both (EHdn + STRling) | 29.81 | 26 | 53.00 | 184 | ONT Supported |
| Sample_2464 | SZ | chr6 | 148,387,067 | 148,388,672 | AAAG | EHdn | 7.32 | 10 | N/A | N/A | ONT Not supported |
| Sample_2467 | SZ | chr14 | 23,280,969 | 23,280,970 | ATTTC | STRling | N/A | N/A | 34.00 | 29 | ONT Supported |
| Sample_2526 | SZ | chr11 | 36,053,657 | 36,055,475 | ATCC | EHdn | 5.03 | 12 | N/A | N/A | ONT Supported |
| Sample_2492 | SZ | chr8 | 2,099,520 | 2,100,804 | AAGG | EHdn | 8.75 | 10 | N/A | N/A | ONT Supported |
| Sample_2498 | SZ | chr19 | 33,217,339 | 33,219,274 | AAAG | EHdn | 28.16 | 11 | N/A | N/A | ONT Supported |
| Sample_2501 | SZ | chr3 | 10,872,838 | 10,874,457 | AGGAT | EHdn | 7.45 | 10 | N/A | N/A | ONT Supported |
| Sample_2507 | SZ | chr5 | 168,754,213 | 168,756,135 | AAGG | EHdn | 12.64 | 13 | N/A | N/A | ONT Supported |
| Sample_2535 | SZ | chr9 | 118,066,584 | 118,066,584 | ATCT | STRling | N/A | N/A | 25.00 | 10 | ONT Supported |
| Sample_2562 | SZ | chr10 | 116,731,222 | 116,733,058 | AAAGGAAG | EHdn | 35.16 | 11 | N/A | N/A | ONT Supported |
| Sample_97 | ASD | chr12 | 103,839,943 | 103,841,393 | AGATG | EHdn | 22.88 | 10 | N/A | N/A | ONT Supported |
| Sample_165 | ASD | chr7 | 101,140,182 | 101,140,183 | AAAG | STRling | N/A | N/A | 16.00 | 4 | ONT Not supported |
| Sample_195 | ASD | chrX | 50,591,669 | 50,591,733 | CTTT | STRling | N/A | N/A | 12.00 | 73 | ONT Supported |
| Sample_1569 | ASD | chr14 | 89,362,654 | 89,362,655 | ACC | STRling | N/A | N/A | 6.50 | 42 | ONT Supported |
| Sample_1590 | ASD | chr21 | 35,347,030 | 35,349,380 | AATAG | EHdn | 10.76 | 13 | N/A | N/A | ONT Supported |
| Sample_2583 | SZ | chr6 | 51,980,741 | 51,981,418 | ACCTCT | EHdn | 20.77 | 11 | N/A | N/A | ONT Supported |
| Sample_2589 | SZ | chr1 | 36,793,262 | 36,794,687 | ATCC | EHdn | 78.88 | 12 | N/A | N/A | ONT Supported |
| Sample_592 | ASD | chr12 | 77,378,198 | 77,378,289 | AAAAT | STRling | N/A | N/A | 18.00 | 4 | ONT Supported |
| Sample_592 | ASD | chr4 | 6,512,582 | 6,512,583 | GGT | STRling | N/A | N/A | 29.00 | 44 | ONT Supported |
| Sample_1614 | ASD | chr1 | 99,681,899 | 99,683,986 | AAAG | EHdn | 18.09 | 11 | N/A | N/A | ONT Supported |
| Sample_1617 | ASD | chr5 | 168,754,951 | 168,755,592 | AAAGG | Both (EHdn + STRling) | 392758.78 | 10 | 49.00 | 141 | ONT Supported |
| Sample_1620 | ASD | chr3 | 169,433,621 | 169,433,622 | AAAG | STRling | N/A | N/A | 51.00 | 105 | ONT Supported |
| Sample_106 | ASD | chr14 | 89,362,654 | 89,362,655 | ACC | STRling | N/A | N/A | 9.50 | 167 | ONT Supported |
| Sample_138 | ASD | chrX | 9,791,491 | 9,793,607 | AATAG | EHdn | 7.43 | 20 | N/A | N/A | ONT Supported |
| Sample_204 | ASD | chr1 | 161,064,846 | 161,064,846 | AAAG | STRling | N/A | N/A | 17.00 | 4 | ONT Not supported |
| Sample_204 | ASD | chr4 | 83,001,971 | 83,001,972 | AACGG | STRling | N/A | N/A | 51.00 | 167 | ONT Supported |
| Sample_263 | ASD | chrX | 9,791,491 | 9,793,607 | AATAG | EHdn | 6.20 | 19 | N/A | N/A | ONT Supported |
| Sample_314 | ASD | chr4 | 39,348,181 | 39,349,432 | AAAAGG | EHdn | 16.16 | 12 | N/A | N/A | ONT Supported |
| Sample_703 | ASD | chr10 | 75,671,222 | 75,672,480 | AAGGG | EHdn | 8.12 | 11 | N/A | N/A | ONT Supported |
| Sample_703 | ASD | chr10 | 100,315,048 | 100,316,099 | AAGGG | EHdn | 6.51 | 15 | N/A | N/A | ONT Supported |
| Sample_1795 | ASD | chr3 | 76,810,979 | 76,812,754 | AAGG | EHdn | 9.20 | 12 | N/A | N/A | ONT Supported |
| Sample_753 | ASD | chr4 | 173,021,529 | 173,023,202 | AAGG | EHdn | 13.82 | 12 | N/A | N/A | ONT Supported |
| Sample_1778 | ASD | chr3 | 185,800,341 | 185,801,405 | AAAG | EHdn | 645.43 | 14 | N/A | N/A | ONT Supported |
| Sample_785 | ASD | chr1 | 21,527,045 | 21,527,046 | CTTTT | STRling | N/A | N/A | 17.00 | 5 | ONT Supported |
| Sample_797 | ASD | chr17 | 80,665,440 | 80,665,453 | CCCTT | STRling | N/A | N/A | 39.00 | 58 | ONT Supported |
| Sample_337 | SZ | chr19 | 55,930,924 | 55,932,877 | AAAG | EHdn | 5.13 | 28 | N/A | N/A | ONT Supported |
| Sample_337 | SZ | chr4 | 73,484,542 | 73,484,543 | CTTT | STRling | N/A | N/A | 36.00 | 33 | ONT Not supported |
| Sample_351 | SZ | chr1 | 215,626,684 | 215,628,558 | AAGG | EHdn | 8.73 | 13 | N/A | N/A | ONT Supported |
| Sample_776 | SZ | chr17 | 80,664,123 | 80,665,453 | AAGGG | Both (EHdn + STRling) | 46.69 | 11 | 46.00 | 136 | ONT Supported |
| Sample_776 | SZ | chr2 | 100,104,798 | 100,105,761 | CCG | EHdn | 27.79 | 10 | N/A | N/A | ONT Supported |
| Sample_394 | SZ | chr4 | 173,020,525 | 173,023,163 | AAGG | EHdn | 15.44 | 12 | N/A | N/A | ONT Supported |
| Sample_682 | SZ | chr19 | 33,217,312 | 33,219,291 | AAAGAGAG | EHdn | 11.18 | 10 | N/A | N/A | ONT Supported |
| Sample_682 | SZ | chr4 | 128,065,490 | 128,065,491 | CTTT | STRling | N/A | N/A | 35.00 | 31 | ONT Supported |
| Sample_2051 | SZ | chr2 | 60,466,673 | 60,468,487 | ACC | EHdn | 5.70 | 10 | N/A | N/A | ONT Supported |
| Sample_2084 | SZ | chr8 | 96,250,649 | 96,250,650 | AGGCGG | STRling | N/A | N/A | 30.00 | 17 | ONT Supported |
| Sample_1059 | ASD | chr2 | 162,751,746 | 162,753,725 | AAAGG | EHdn | 70.64 | 22 | N/A | N/A | ONT Supported |
| Sample_871 | ASD | chr20 | 63,442,372 | 63,444,174 | ACC | EHdn | 5.67 | 12 | N/A | N/A | ONT Supported |
| Sample_871 | ASD | chr3 | 29,828,977 | 29,829,049 | CTTT | STRling | N/A | N/A | 26.00 | 12 | ONT Supported |
| Sample_908 | ASD | chr7 | 78,955,700 | 78,955,784 | CTTT | STRling | N/A | N/A | 35.00 | 32 | ONT Supported |
| Sample_1476 | ASD | chr14 | 76,358,167 | 76,359,502 | AAAG | EHdn | 11.09 | 11 | N/A | N/A | ONT Supported |
| Sample_1476 | ASD | chrX | 12,053,326 | 12,053,327 | AAAG | STRling | N/A | N/A | 7.50 | 31 | ONT Supported |
| Sample_1404 | ASD | chr4 | 173,020,525 | 173,023,163 | AAGG | EHdn | 16.73 | 16 | N/A | N/A | ONT Supported |
| Sample_1417 | ASD | chr1 | 57,695,004 | 57,695,005 | AAAG | STRling | N/A | N/A | 34.00 | 34 | ONT Not supported |
| Sample_1417 | ASD | chr5 | 73,736,804 | 73,738,293 | AAAAG | EHdn | 16.95 | 10 | N/A | N/A | ONT Supported |
| Sample_1420 | ASD | chr11 | 119,205,454 | 119,206,821 | CCG | Both (EHdn + STRling) | 133.57 | 39 | 51.00 | 558 | ONT Supported |
| Sample_1449 | ASD | chr18 | 36,562,239 | 36,562,240 | ATTGT | STRling | N/A | N/A | 55.00 | 222 | ONT Supported |
| Sample_1543 | ASD | chr5 | 168,754,213 | 168,756,135 | AAGG | EHdn | 21.90 | 13 | N/A | N/A | ONT Supported |
| Sample_1549 | ASD | chr21 | 35,348,031 | 35,349,799 | AATAG | EHdn | 13.68 | 12 | N/A | N/A | ONT Supported |
| Sample_1549 | ASD | chr4 | 39,348,415 | 39,348,427 | AGGGC | STRling | N/A | N/A | 50.00 | 183 | ONT Supported |
| Sample_1863 | ASD | chrX | 9,791,491 | 9,793,607 | AATAG | EHdn | 5.47 | 19 | N/A | N/A | ONT Supported |
| Sample_877 | SZ | chr14 | 23,280,108 | 23,281,185 | AAGAT | Both (EHdn + STRling) | 405576.21 | 20 | 50.00 | 281 | ONT Supported |
| Sample_877 | SZ | chr2 | 157,554,441 | 157,555,425 | AAAG | EHdn | 5.19 | 10 | N/A | N/A | ONT Supported |
| Sample_877 | SZ | chrX | 11,590,985 | 11,591,800 | AAAG | EHdn | 25.94 | 13 | N/A | N/A | ONT Not supported |
| Sample_849 | ASD | chr7 | 103,989,712 | 103,989,713 | CCG | STRling | N/A | N/A | 13.00 | 6 | ONT Supported |
| Sample_1203 | SZ | chr14 | 23,280,108 | 23,281,185 | AAGAT | Both (EHdn + STRling) | 266772.21 | 15 | 49.00 | 244 | ONT Supported |
| Sample_527 | ASD | chr9 | 35,828,384 | 35,828,442 | AAC | STRling | N/A | N/A | 35.00 | 43 | ONT Supported |
| Sample_527 | ASD | chr9 | 131,419,245 | 131,421,276 | AAAGAAGG | EHdn | 26.39 | 15 | N/A | N/A | ONT Supported |
| Sample_527 | ASD | chrX | 104,762,374 | 104,762,375 | CTT | STRling | N/A | N/A | 10.00 | 43 | ONT Not supported |

**Supplementary Table 5 | Regression results for cell-type-resolved TAD-boundary SV-burden analysis.** Complete B'-model association statistics for all 10 L2 cell-type boundary classes across six panels. Panel A: Pattern A (NAHR-mediated loci excluded; primary), ASD vs. controls and SZ vs. controls. Panel B: Pattern B (NAHR-mediated loci included; sensitivity). Panel C: Pattern C (NAHR-excluded, SV ≤ 1 Mb; secondary sensitivity). Panel D: Aggregate exon-exclusion discovery results for the two-test confirmatory family—(A1) exon-free boundary bins only (primary, Firth-penalized B'-adjusted logistic regression) and (A2) joint model with exon-free and exon-overlapping co-exposures (supporting mechanistic test, standard B'-adjusted logistic regression). Panel E: Multinomial logistic ASD-vs-SZ heterogeneity test (Pattern A). Panel F: Exploratory sex-stratified and sex × case interaction analyses for aggregate Diff_any-DEL burden. Panel F analyses used the primary aggregate Diff_any-DEL B' covariate framework; sex-stratified models omitted the sex covariate, and interaction models evaluated a Diff_any-DEL × sex interaction term. Panel F analyses were exploratory and not used for primary inference. Panel F reports: comparison, analysis, sex stratum, n_case, n_control, n_exposed_case, n_exposed_control, OR [95% CI], P-value, interaction OR [95% CI], interaction P and note. Panels A–C report: boundary class, SV type, comparison, n_case, n_control, n_exposed_case, n_exposed_control, OR [95% CI], P-value and BH-FDR (within SV type × comparison stratum). Panel D reports: analysis (A1/A2), comparison, SV type, bin type / restriction, cohort, model, OR [95% CI], two-sided P-value, two-test BH-FDR (discovery), n_case, n_control, n_exposed_case, n_exposed_control and role. Panel E reports: boundary class, SV type, n_case_ASD, n_case_SZ, n_control, β_ASD, SE_ASD, β_SZ, SE_SZ, Cov(β_ASD, β_SZ), z_het, P_het (two-sided), OR_diff [95% CI], role and note.

**Supplementary Table 6 | External replication, boundary-type specificity, exon-exclusion replication, ASD-vs-SZ heterogeneity, representative locus annotations, constraint-enrichment and Halvorsen adult/foetal cortical 40-kb TAD-boundary comparator analyses for the TAD-boundary SV-burden analyses (Fig. 3).** A multi-panel table supporting the main text Fig. 3 analyses. Panel A: External replication in two independent ASD cohorts (Japanese arrayCGH case–control and MSSNG family-based), with two-cohort (Japanese arrayCGH × MSSNG) cross-replication IVW fixed-effect meta-analysis as the primary method, for all 10 boundary classes; formal replication was pre-specified for the nine discovery-positive classes (seven replicated at one-sided BH-FDR < 0.05, two did not pass the confirmatory threshold), with the remaining class (PFC Astro, discovery-null) shown descriptively. Panel B: Matched-static specificity test comparing observed ORs against property-matched static-boundary null distributions under a single L2-primary matching algorithm (exact matching on chromosome + gene-density bin + segmental-duplication bin, with local progressive relaxation to chromosome + gene-density bin and then chromosome only when the exact-match pool was insufficient; 10,000 resamples per class; empirical P = (1+k)/(1+10,000), minimum reportable 9.99 × 10–5). Panel C: Diff_any vs. Static per-bin boundary-type specificity analysis. Bins were classified as Diff_any (union of differential bins across the 10 analysable L2 classes) or Static (boundary bins non-differential in all 10 classes); both categories were evaluated by two-cohort external IVW meta-analysis under the same B' regression specification as the class-level analysis. Panel D: Two-test exon-exclusion replication (MSSNG) results, reporting A1 (exon-free boundary-bin separate model; primary) and A2 (exon-free + exon-overlap joint model; supporting mechanistic test) fitted by GEE Binomial Independence with family-level clustering, with Holm correction over the two one-sided replication P-values. Panel E: Japanese arrayCGH cross-disorder extension. Block E1 reports SZ-vs-control binary deletion burden (pooled B' logistic regression adjusting for sex, log1p(total_bases), log1p(total_gene) and platform; n = 2,683 SZ cases, 3,583 controls) alongside the corresponding ASD results for each boundary class, with platform-stratified IVW as a sensitivity analysis. Block E2 reports ASD-vs-SZ heterogeneity from multinomial logistic regression (three-level outcome: Control = 0, ASD = 1, SZ = 2; pooled n = 7,104) with B' covariates, for pooled and platform-stratified (Agilent-only, NimbleGen-only) analyses; class-level global directional consistency summarized by correlation-adjusted Stouffer Z-method with Brown’s variance correction and one-sided binomial sign test (directional alternative: ASD > SZ). Panel F: Representative locus illustrations of cell-type-differential boundary disruptions in the discovery WGS cohort. Panels G–K: Diff_any-bounded TAD-scale regulatory-domain constraint-enrichment analyses, including the primary three-cohort IVW (WGS Discovery + Japanese arrayCGH within-array IVW + MSSNG GEE), cohort-level components, independent external two-cohort IVW, direct-overlap exclusion sensitivity, cut-off and distance-window sensitivities, Static-bounded reconstruction (descriptive scale-mismatched comparison) and WGS component-consistency / post-hoc power checks. Panel L: Aggregate-signal robustness (four layers: standard LOCO, strict LOCO, top-N high-burden sample exclusion, top-N deletion-event exclusion) for the ASD-DEL aggregate Diff_any architecture-level primary end-point. Panel M: Halvorsen 40-kb TAD-boundary comparator using parallel adult and foetal cortical boundary annotations, testing rare Pattern A CNV burden at adult- and foetal-flagged 40-kb cortical TAD-boundary bins (adult n = 1,948; foetal n = 1,792 GRCh38 autosomal bins after hg19→GRCh38 liftOver) under the SV-type-specific gene-overlap-adjusted B' covariate framework, with ASD–SZ heterogeneity assessed in parallel for each tissue annotation and SV type.

**Supplementary Table 7 | Rare variant burden analysis across risk-gene sets.** Carrier rates and association statistics for rare damaging variants in externally defined neuropsychiatric risk-gene sets. For Panels A and B, case–control association was tested using Firth logistic regression adjusted for sex and PC1–PC10, with Fisher’s exact test provided as a reference. For Panel C, ASD–SZ de novo carrier-rate differences were tested using Fisher’s exact test as the primary analysis and Firth logistic regression adjusted for sex and PC1–PC10 as a sensitivity analysis. Multiple-testing correction was applied by Benjamini–Hochberg FDR within the relevant variant-class and comparison strata. Panel A: Rare protein-truncating variant (PTV) burden. Carrier rates and association statistics for rare PTVs (gnomAD genome AF < 0.001, canonical loss-of-function consequences) in three pre-specified gene sets, stratified by LOEUF constraint threshold (< 0.35, < 0.6 and no restriction). Columns: LOEUF filter, Gene set, Group/Comparison, N total, N carrier, Carrier rate, Fisher OR, Fisher P, Fisher FDR q, Firth OR, Firth 95% CI lower, Firth 95% CI upper, Firth P, Firth FDR q. Panel B: Rare CNV burden. Carrier rates and association statistics for two CNV strata: (i) rare exonic deletions intersecting MANE Select exons of risk-gene sets (DEL_exonic), and (ii) curated NAHR-mediated genomic disorder CNVs at recurrent loci (NAHR_GD). Columns: CNV type, Gene set/Category, Group/Comparison, N total, N carrier, Carrier rate, Fisher OR, Fisher P, Fisher FDR q, Firth OR, Firth 95% CI lower, Firth 95% CI upper, Firth P, Firth FDR q. Panel C: De novo SNV/indel burden. Carrier rates and ASD-vs-SZ association statistics for de novo SNV/indels in the same gene sets, stratified by variant pathogenicity filtering (no-score: all de novo variants; with-score: restricted to missense variants predicted pathogenic by at least one of AlphaMissense ≥ 0.906, REVEL ≥ 0.773, VARITY_R ≥ 0.842 or ESM1b ≤ –12.1; protein-truncating variants included without score filtering). No significant differences were observed between ASD and SZ after FDR correction. Columns: Filter, Gene set, Group/Comparison, N total, N carrier, Carrier rate, Fisher OR, Fisher P, Fisher FDR q, Firth OR, Firth 95% CI lower, Firth 95% CI upper, Firth P, Firth FDR q, Note.

**Supplementary Table 8 | Integrated TADA-based gene discovery results for ASD.** Results from a Bayesian TADA meta-analysis integrating de novo SNV/indel evidence from five cohorts (ASC, SPARK, our study, Kim et al., MSSNG; 21,135 probands), inherited and case–control evidence from Fu et al. (5,591 cases; 8,597 controls) and de novo CNV evidence from three cohorts (Fu et al., our study, MSSNG; 19,189 probands). For each gene, the table reports: rank, gene symbol, chromosome, LOEUF score, Bayes Factors for each evidence class (BF_PTV, BF_MisB, BF_MisA, BF_Del [deletions], BF_Dup [duplications]), total BF, log10(BF) and Bayesian FDR. Genes are ranked by decreasing BF. A total of 267 genes met FDR ≤ 0.05 (98 at FDR ≤ 0.001). π0 = 0.95 was used for FDR computation. Panel A: per-gene results for the 267 significant genes (rank, gene symbol, chromosome, LOEUF, Bayes Factors for each evidence class, total BF, log10(BF) and Bayesian FDR). Panel B: per-gene variant counts used as input to the TADA meta-analysis for all 18,128 assessed protein-coding genes (mutation rates, de novo SNV/indel counts in probands and unaffected siblings for each of the five cohorts separately, inherited transmitted/untransmitted counts, case–control counts, de novo CNV counts and the resulting Bayes Factors and Bayesian FDR). Genes are ranked by decreasing BF in both panels. See Supplementary Methods for detailed cohort descriptions and analytical procedures.

**Supplementary Table 9 | Integrated SZ exome meta-analysis incorporating the Japanese WGS stratum.** Cross-ancestry CMH meta-analysis combining the Chick et al. SZ exome dataset with the Japanese WGS case–control stratum, and de novo SNV/indel evidence from Japanese and prior trio cohorts via Fisher’s combined P. Multiple-testing correction by Benjamini–Hochberg FDR; Bonferroni-significant threshold at exome-wide level (P < 2.77 × 10–6). Japanese WGS evidence for ZMYM2, RANBP9, AMPH and SREK1 is shown in Panel A. Panel A: per-gene results for all 30 genes reaching FDR < 0.05 in the SZ meta-analysis (gene symbol, Ensembl gene ID, best variant class, CMH case–control P-value [13-stratum], de novo P-value, Fisher’s combined meta P-value, Bonferroni significance, Benjamini–Hochberg q-value, Japanese case–control carrier counts, Japanese de novo PTV, total de novo count, significance level). Panel B: full gene-level SZ meta-analysis results for all 18,043 protein-coding genes tested in the meta-analysis (gene symbol, Ensembl gene ID, variant class, CMH P-value, de novo P-value, meta P-value, Bonferroni-corrected P-value, Bonferroni significance flag, Benjamini–Hochberg FDR q-value, FDR-significant flag).

**Supplementary Table 10 | PRS association, predictive performance, and decile-stratified risk.** Panel A: Overall PRS association statistics for SZ and ASD, including logistic regression results (OR per 1 SD of PRS), AUC and Nagelkerke’s pseudo-R². Panel B: Decile-stratified ORs with the lowest decile as reference, adjusted for sex and PC1–PC10. OR, odds ratio; CI, confidence interval; AUC, area under the receiver operating characteristic curve.

**Panel A: PRS association and predictive performance**

| **Metric** | **SZ PRS** | **ASD PRS** |
| --- | --- | --- |
| Discovery GWAS | PGC3 wave3 (EUR+EAS) | iPSYCH/PGC 2017 (EUR) |
| Discovery N (total) | ≈155,000 | ≈46,000 |
| PRS-CSx mode | Trans-ancestry (meta=True) | EUR-only (meta=False) |
| N variants (post-QC) | ≈1,094,000 | ≈1,027,000 |
| Target N cases / controls | 634 / 8,442 | 508 / 8,442 |
| OR per SD (95% CI) | 1.900 (1.745–2.069) | 1.047 (0.959–1.143) |
| P | 2.61 × 10⁻⁴⁹ | 0.307 |
| AUC base (95% CI) | 0.573 (0.549–0.597) | 0.660 (0.633–0.686) |
| AUC full (95% CI) | 0.684 (0.660–0.707) | 0.661 (0.635–0.687) |
| ΔAUC | 0.111 | 0.001 |
| Nagelkerke R² base | 0.013 | 0.051 |
| Nagelkerke R² full | 0.073 | 0.052 |
| ΔR² | 0.062 | 0.0003 |

**Panel B: PRS decile-stratified risk (reference = lowest decile)**

| **Decile** | **SZ OR (95% CI)** | **SZ P** | **SZ Cases** | **SZ Controls** | **ASD OR (95% CI)** | **ASD P** | **ASD Cases** | **ASD Controls** |
| --- | --- | --- | --- | --- | --- | --- | --- | --- |
| 1 (ref) | 1.00 | — | 24 | 884 | 1.00 | — | 38 | 857 |
| 2 | 1.30 (0.76–2.24) | 0.340 | 31 | 877 | 1.21 (0.78–1.89) | 0.394 | 45 | 850 |
| 3 | 1.48 (0.87–2.50) | 0.149 | 35 | 872 | 1.60 (1.05–2.45) | 0.030 | 57 | 838 |
| 4 | 1.60 (0.95–2.69) | 0.076 | 38 | 870 | 1.17 (0.75–1.83) | 0.486 | 44 | 851 |
| 5 | 2.61 (1.61–4.24) | 9.94 × 10⁻⁵ | 60 | 847 | 1.40 (0.90–2.16) | 0.132 | 51 | 844 |
| 6 | 1.85 (1.12–3.08) | 0.017 | 44 | 864 | 1.71 (1.12–2.60) | 0.012 | 61 | 834 |
| 7 | 2.74 (1.69–4.44) | 4.05 × 10⁻⁵ | 62 | 845 | 1.84 (1.21–2.78) | 0.004 | 66 | 829 |
| 8 | 3.90 (2.45–6.19) | 8.70 × 10⁻⁹ | 86 | 822 | 1.28 (0.82–2.00) | 0.272 | 46 | 849 |
| 9 | 5.05 (3.21–7.95) | 2.76 × 10⁻¹² | 107 | 800 | 1.43 (0.93–2.21) | 0.103 | 52 | 843 |
| 10 | 7.31 (4.69–11.40) | 1.64 × 10⁻¹⁸ | 147 | 761 | 1.26 (0.81–1.96) | 0.300 | 48 | 847 |

**Supplementary Table 11 | Joint-layer logistic regression integrating WGS-enabled and established genetic risk layers across ASD and SZ.** Integrative sensitivity analysis fitting nested logistic regression models that progressively add six variant-class layers to a B′-aligned base model (Sex_numeric + PC1–PC10 + log1p[total_del_bases] + log1p[total_gene_DEL]; sequencing depth additionally included for TRE-layer compatibility) under separate ASD-vs-Controls and SZ-vs-Controls parallel logistic regressions, evaluating whether the primary WGS-enabled signals (TAD Diff_any-boundary deletion burden and rare TRE outlier carriage) are retained after adjustment for established coding, CNV, polygenic or repeat-expansion risk layers. Layer progression: M0 (base) → +TAD (Diff_any_DEL count) → +TRE (rare_any binary) → +PRS (disorder-specific PRS-CSx, MHC-excluded, z-scored within controls of the joint subset) → +PTV (binary; rare PTV in disorder-specific risk-gene set: asd_fu_fdr005 [185 genes] for ASD; scz_chick_fdr005 [28 genes] for SZ) → +CNV (binary; rare exonic deletion overlapping the disorder-specific risk-gene set) → +NAHR-CNV (binary; carrier of disorder-specific NAHR-mediated genomic disorder loci: 27 ASD-associated; 9 SZ-associated). Joint analytic subset N = 8,877 for ASD and N = 8,999 for SZ. Both EHdn and STRling TRE callers reported as separate panels; results caller-concordant. Panel A: Progressive nested logistic regression results (M0 to Mfull) across the four disorder × caller combinations (28 rows total). Panel B: Added-last conditional-contribution likelihood-ratio test for each layer in Mfull (24 rows; Note column flags sparse-data warnings, which refer to ancillary covariates rather than TAD/TRE main effects). Panel C: Multinomial logistic regression with shared controls (Controls = baseline; ASD/SZ as alternative outcomes), formal Wald contrast on β_TAD,ASD – β_TAD,SZ, reported in five model-subset variants. Panel D: Static-boundary sensitivity model with Static_DEL co-modelled alongside Diff_any_DEL to test robustness against generic boundary disruption. Panel E: Per-layer carrier counts and continuous exposure summaries by disorder × caller. Panel F: Pearson correlations among the seven layer variables (six progressive layers + Static_DEL) in controls of the joint subset. Panel G: Per-model glm convergence diagnostics. The SZ exonic risk-gene CNV layer (Matched_SZ; scz_chick_fdr005 gene set) was estimated from a small carrier set in the joint subset (five SZ cases and 32 controls; consistent with Supplementary Table 7, Panel B), yielding a wide confidence interval; the resulting full-model effect estimate (OR ≈ 2.4, P ≈ 0.08) should be interpreted as directional rather than a precise effect size. Full methodology and panel definitions are shown in Supplementary Methods §12.13.

**Supplementary Table 12 | CNV validation concordance with NimbleGen array CGH.** WGS-to-array CGH concordance rates for rare CNVs detected by CNVkit, stratified by CNV size and type (deletion or duplication). Concordance was defined as reciprocal overlap ≥50% with matching CNV type in the same individual. WGS CNV coordinates (hg38) were converted to hg18 using UCSC liftOver prior to comparison. Analysis was restricted to 297 individuals with NimbleGen array CGH data. CNVs were filtered to exclude common CNV sites (frequency ≥1%, one-directional overlap ≥30%), segmental-duplication regions (≥50% coverage), HLA/MHC region and high-burden outlier samples (top 1%).

| **Size** | **DEL (n/N)** | **DEL (%)** | **DUP (n/N)** | **DUP (%)** | **ALL (n/N)** | **ALL (%)** |
| --- | --- | --- | --- | --- | --- | --- |
| 25–50 kb | 143/174 | 82.2 | 107/136 | 78.7 | 250/310 | 80.6 |
| 50–100 kb | 109/114 | 95.6 | 71/77 | 92.2 | 180/191 | 94.2 |
| 100–500 kb | 70/75 | 93.3 | 116/120 | 96.7 | 186/195 | 95.4 |
| 500 kb–1 Mb | 4/4 | 100.0 | 24/24 | 100.0 | 28/28 | 100.0 |
| >1 Mb | 8/9 | 88.9 | 7/7 | 100.0 | 15/16 | 93.8 |
| **Total** | **334/376** | **88.8** | **325/364** | **89.3** | **659/740** | **89.1** |

n/N = number of concordant WGS CNVs / total WGS CNVs evaluated. Concordance defined as reciprocal overlap ≥50% with type matching (DEL–DEL or DUP–DUP) in the same individual. Analysis restricted to 297 samples with NimbleGen array CGH data. CNVs were filtered using quality criteria matching the gene-based rare CNV burden analyses: common CNV exclusion (frequency ≥1%, one-directional overlap ≥30%), segmental-duplication coverage ≥50%, HLA/MHC exclusion, and high-burden outlier removal (top 1%).

**Supplementary Table 13 | WGS technical quality metrics across diagnostic groups.** Summary of sequencing technical quality metrics for the harmonized PCR-free paired-end 150-bp Illumina short-read WGS cohort, summarized across diagnostic groups (ASD probands, SZ probands, NCBN biobank controls) and sequenced relatives. Panel A: sequencing yield and alignment metrics from samtools flagstat (total reads, mapped %, duplicate %, properly paired %). Panel B: base-quality and library metrics from samtools stats (bases ≥ Q30, mean insert size). Panel C: coverage metrics from mosdepth (mean autosomal depth, genome coverage at ≥20× and ≥30×). All values are median [Q1–Q3]. N denotes the per-panel sample count with non-missing metric value; the Panel C N is lower than Panel A/B because coverage metrics were derived from the mosdepth light-QC summary subset. Core sequencing-quality metrics (mapping rate, Q30, mean autosomal depth and genome coverage at ≥20×) were broadly comparable across diagnostic groups. Modest systematic differences between NCBN Controls and the disorder cohorts were observed in duplicate rate and insert-size distribution, consistent with library-preparation batch structure. The ‘Sequenced relatives’ count (n = 1,382) reflects sequenced family members in ASD/SZ pedigrees with available technical QC summaries, 1,366 of which belonged to the analysed cohort shown in Fig. 1; the additional 16 individuals were not included in the final Fig. 1 cohort after downstream sample-level QC and cohort-definition filters.

| **Metric** | **ASD** | **SZ** | **Controls** | **Sequenced relatives** |
| --- | --- | --- | --- | --- |
| **Panel A. Sequencing yield and alignment (samtools flagstat)** | | | | |
| N | 597 | 762 | 8,610 | 1,382 |
| Total reads (×10⁶) | 817 [757–898] | 786 [733–843] | 799 [762–836] | 833 [766–938] |
| Mapped reads (%) | 99.99 [99.98–99.99] | 99.99 [99.98–99.99] | 99.99 [99.98–99.99] | 99.98 [99.47–99.99] |
| Duplicate reads (%) | 10.40 [8.84–12.82] | 10.67 [9.20–12.86] | 5.81 [5.17–6.67] | 10.08 [8.67–12.43] |
| Properly paired reads (%) | 89.74 [88.05–90.78] | 90.21 [89.36–91.03] | 87.32 [86.15–88.27] | 89.50 [82.49–90.67] |
| **Panel B. Base-quality and library metrics (samtools stats)** | | | | |
| N | 597 | 762 | 8,610 | 1,382 |
| Bases ≥ Q30 (%) | 89.92 [89.12–90.65] | 89.82 [89.00–90.69] | 89.69 [89.06–90.24] | 89.66 [89.00–90.23] |
| Insert size, mean (bp) | 657.7 [614.6–704.0] | 634.0 [606.2–671.2] | 701.1 [681.3–728.5] | 659.0 [618.2–709.9] |
| **Panel C. Coverage metrics (mosdepth)** | | | | |
| N | 540 | 684 | 8,562 | 1,202 |
| Mean autosomal depth (×) | 32.07 [30.09–34.74] | 31.93 [30.03–33.88] | 33.27 [31.76–34.86] | 32.19 [30.27–34.42] |
| % genome ≥ 20× | 85 [83–87] | 85 [84–87] | 86 [85–88] | 86 [84–88] |
| % genome ≥ 30× | 57 [47–68] | 57 [48–65] | 63 [55–69] | 58 [48–68] |

1. ASD: autism spectrum disorder probands; SZ: schizophrenia probands; controls: NCBN biobank controls; Sequenced relatives: sequenced family members in pedigrees containing at least one ASD or SZ proband.

2. The "Sequenced relatives" count in this table (n = 1,382) reflects sequenced family members in ASD/SZ pedigrees with available technical QC summaries, of which 1,366 belonged to the analysed cohort shown in Fig. 1; the additional 16 individuals were not included in the final Fig. 1 cohort after downstream sample-level QC and cohort-definition filters.

3. Total reads include supplementary and secondary alignments; mapped %, duplicate %, and properly paired % are computed from samtools flagstat as fractions of QC-passed reads. Bases ≥ Q30 (%) was computed from samtools stats FFQ + LFQ per-cycle base-quality histograms.

4. Read-level, base-quality and library metrics (Panels A and B) were available for all samples summarized in those panels. Coverage metrics in Panel C were summarized for samples with available mosdepth light-QC summaries; therefore, N differs from Panels A–B.

5. Core sequencing-quality metrics (mapping rate, Q30, mean autosomal depth, and genome coverage at ≥20×) were broadly comparable across diagnostic groups. Modest systematic differences between NCBN Controls and the disorder cohorts were observed in duplicate rate (median 5.8% in controls vs. 10–11% in cases and sequenced relatives) and insert-size distribution (median mean insert size 701 bp in controls vs. 634–660 bp in cases and sequenced relatives). These differences were modest relative to overall sequencing depth and mapping/base-quality metrics, but are reported transparently because they may reflect library-preparation batch structure between the NCBN biobank and the disorder cohorts.

**References**

1. Won H*, et al.* Chromosome conformation elucidates regulatory relationships in developing human brain. *Nature* **538**, 523-527 (2016).

2. Halvorsen M*, et al.* Increased burden of ultra-rare structural variants localizing to boundaries of topologically associated domains in schizophrenia. *Nature Communications* **11**, (2020).

3. Heffel MG*, et al.* Temporally distinct 3D multi-omic dynamics in the developing human brain. *Nature* **635**, 481-489 (2024).

4. Kushima I*, et al.* Cross-Disorder Analysis of Genic and Regulatory Copy Number Variations in Bipolar Disorder, Schizophrenia, and Autism Spectrum Disorder. *Biological Psychiatry* **92**, 362-374 (2022).

5. Arinami T*, et al.* Genomewide High-Density SNP Linkage Analysis of 236 Japanese Families Supports the Existence of Schizophrenia Susceptibility Loci on Chromosomes 1p, 14q, and 20p. *The American Journal of Human Genetics* **77**, 937-944 (2005).

6. Omae Y, Goto Y-I, Tokunaga K. National Center Biobank Network. *Human Genome Variation* **9**, (2022).

7. Kawai Y*, et al.* Exploring the genetic diversity of the Japanese population: Insights from a large-scale whole genome sequencing analysis. *PLOS Genetics* **19**, e1010625 (2023).

8. Talevich E, Shain AH, Botton T, Bastian BC. CNVkit: Genome-Wide Copy Number Detection and Visualization from Targeted DNA Sequencing. *PLoS Comput Biol* **12**, e1004873 (2016).

9. Geoffroy V*, et al.* AnnotSV: an integrated tool for structural variations annotation. *Bioinformatics* **34**, 3572-3574 (2018).

10. Fu JM*, et al.* Rare coding variation provides insight into the genetic architecture and phenotypic context of autism. *Nature Genetics* **54**, 1320-1331 (2022).

11. Chick SL*, et al.* Whole-exome sequencing analysis identifies risk genes for schizophrenia. *Nature Communications* **16**, (2025).

12. Morales J*, et al.* A joint NCBI and EMBL-EBI transcript set for clinical genomics and research. *Nature* **604**, 310-315 (2022).

13. Karczewski KJ*, et al.* The mutational constraint spectrum quantified from variation in 141,456 humans. *Nature* **581**, 434-443 (2020).

14. Firth D. Bias reduction of maximum likelihood estimates. *Biometrika* **80**, 27-38 (1993).

15. Heinze G, Schemper M. A solution to the problem of separation in logistic regression. *Statistics in Medicine* **21**, 2409-2419 (2002).

16. Benjamini Y, Hochberg Y. Controlling the False Discovery Rate: A Practical and Powerful Approach to Multiple Testing. *Journal of the Royal Statistical Society Series B: Statistical Methodology* **57**, 289-300 (1995).

17. Dolzhenko E*, et al.* ExpansionHunter Denovo: a computational method for locating known and novel repeat expansions in short-read sequencing data. *Genome Biology* **21**, (2020).

18. Dashnow H*, et al.* STRling: a k-mer counting approach that detects short tandem repeat expansions at known and novel loci. *Genome Biology* **23**, (2022).

19. He X*, et al.* Integrated Model of De Novo and Inherited Genetic Variants Yields Greater Power to Identify Risk Genes. *PLoS Genetics* **9**, e1003671 (2013).

20. Kim S-W*, et al.* Whole genome sequencing analysis identifies sex differences of familial pattern contributing to phenotypic diversity in autism. *Genome Medicine* **16**, (2024).

21. Singh T*, et al.* Rare coding variants in ten genes confer substantial risk for schizophrenia. *Nature* **604**, 509-516 (2022).

22. Trubetskoy V*, et al.* Mapping genomic loci implicates genes and synaptic biology in schizophrenia. *Nature* **604**, 502-508 (2022).

23. Grove J*, et al.* Identification of common genetic risk variants for autism spectrum disorder. *Nature Genetics* **51**, 431-444 (2019).

24. Ruan Y*, et al.* Improving polygenic prediction in ancestrally diverse populations. *Nature Genetics* **54**, 573-580 (2022).

25. Ge T, Chen C-Y, Ni Y, Feng Y-CA, Smoller JW. Polygenic prediction via Bayesian regression and continuous shrinkage priors. *Nature Communications* **10**, (2019).

26. Hanley JA, McNeil BJ. The meaning and use of the area under a receiver operating characteristic (ROC) curve. *Radiology* **143**, 29-36 (1982).

27. Trost B*, et al.* Genomic architecture of autism from comprehensive whole-genome sequence annotation. *Cell* **185**, 4409-4427 e4418 (2022).

28. Boone PM*, et al.* Detection of clinically relevant exonic copy-number changes by array CGH. *Hum Mutat* **31**, 1326-1342 (2010).

29. Mason-Suares H*, et al.* Density matters: comparison of array platforms for detection of copy-number variation and copy-neutral abnormalities. *Genet Med* **15**, 706-712 (2013).

30. Giusti-Rodríguez P*, et al.* Using three-dimensional regulatory chromatin interactions from adult and fetal cortex to interpret genetic results for psychiatric disorders and cognitive traits. *BioRxiv*, 406330 (2018).

31. Chang CC, Chow CC, Tellier LC, Vattikuti S, Purcell SM, Lee JJ. Second-generation PLINK: rising to the challenge of larger and richer datasets. *Gigascience* **4**, (2015).

32. Franke M*, et al.* Formation of new chromatin domains determines pathogenicity of genomic duplications. *Nature* **538**, 265-269 (2016).
