# Supplementary material
Source: Research Square preprint supplement (doi:10.21203/rs.3.rs-9869940/v1)
Supplement: Supplementary file 3 [file 4d03c1a90b5be628b5348a91.xlsx]

## Sheet: A_PatternA_Primary
Boundary class	SV type	Comparison	n_case	n_control	n_exposed_case	n_exposed_control	OR [95% CI]	P-value	BH-FDR (within SV type + comparison stratum)
Aggregate Diff_any architecture-level primary tests (4-test family; ASD/SZ × DEL/DUP)
Aggregate Diff_any	DEL	ASD vs Controls	505	8372	50	430	1.433 [1.211–1.696]	2.88e-05	0.000115
Aggregate Diff_any	DUP	ASD vs Controls	505	8372	64	1164	0.952 [0.810–1.119]	0.553	0.737
Aggregate Diff_any	DEL	SZ vs Controls	627	8372	39	430	1.115 [0.935–1.331]	0.226	0.452
Aggregate Diff_any	DUP	SZ vs Controls	627	8372	89	1164	0.963 [0.832–1.116]	0.619	0.737
Per-class secondary localization (10 L2 classes per comparison × SV-type)
HPC Exc-CA	DEL	ASD vs Controls	505	8372	12	95	1.769 [1.038-3.013]	0.036	0.043
HPC Exc-CA	DEL	SZ vs Controls	627	8372	5	95	0.908 [0.460-1.792]	0.780	0.975
HPC Exc-CA	DUP	ASD vs Controls	505	8372	20	317	0.998 [0.645-1.544]	0.994	0.994
HPC Exc-CA	DUP	SZ vs Controls	627	8372	22	317	0.933 [0.618-1.409]	0.742	0.944
HPC Exc-DG	DEL	ASD vs Controls	505	8372	15	85	2.785 [1.590-4.877]	3.40e-04	1.70e-03
HPC Exc-DG	DEL	SZ vs Controls	627	8372	7	85	1.251 [0.629-2.489]	0.523	0.935
HPC Exc-DG	DUP	ASD vs Controls	505	8372	15	302	0.902 [0.556-1.464]	0.676	0.994
HPC Exc-DG	DUP	SZ vs Controls	627	8372	16	302	0.783 [0.484-1.266]	0.318	0.944
HPC Exc-ENT	DEL	ASD vs Controls	505	8372	19	123	2.128 [1.369-3.307]	7.80e-04	2.00e-03
HPC Exc-ENT	DEL	SZ vs Controls	627	8372	12	123	1.192 [0.697-2.038]	0.522	0.935
HPC Exc-ENT	DUP	ASD vs Controls	505	8372	17	333	0.821 [0.517-1.303]	0.402	0.994
HPC Exc-ENT	DUP	SZ vs Controls	627	8372	27	333	1.034 [0.706-1.514]	0.863	0.944
HPC Inh-CGE	DEL	ASD vs Controls	505	8372	10	66	2.215 [1.210-4.056]	9.95e-03	0.014
HPC Inh-CGE	DEL	SZ vs Controls	627	8372	10	66	1.615 [0.828-3.151]	0.160	0.935
HPC Inh-CGE	DUP	ASD vs Controls	505	8372	11	236	0.831 [0.471-1.466]	0.523	0.994
HPC Inh-CGE	DUP	SZ vs Controls	627	8372	25	236	1.444 [0.963-2.164]	0.075	0.754
HPC Inh-MGE	DEL	ASD vs Controls	505	8372	7	56	1.952 [1.036-3.677]	0.038	0.043
HPC Inh-MGE	DEL	SZ vs Controls	627	8372	4	56	0.723 [0.260-2.008]	0.533	0.935
HPC Inh-MGE	DUP	ASD vs Controls	505	8372	11	167	1.004 [0.545-1.851]	0.989	0.994
HPC Inh-MGE	DUP	SZ vs Controls	627	8372	11	167	0.801 [0.436-1.470]	0.474	0.944
PFC Astro	DEL	ASD vs Controls	505	8372	8	75	1.499 [0.885-2.540]	0.133	0.133
PFC Astro	DEL	SZ vs Controls	627	8372	7	75	0.996 [0.461-2.153]	0.991	0.991
PFC Astro	DUP	ASD vs Controls	505	8372	14	215	0.972 [0.577-1.638]	0.915	0.994
PFC Astro	DUP	SZ vs Controls	627	8372	16	215	0.932 [0.562-1.546]	0.785	0.944
PFC Exc-DL	DEL	ASD vs Controls	505	8372	17	132	1.922 [1.197-3.085]	6.83e-03	0.011
PFC Exc-DL	DEL	SZ vs Controls	627	8372	10	132	1.087 [0.634-1.865]	0.761	0.975
PFC Exc-DL	DUP	ASD vs Controls	505	8372	26	397	0.953 [0.644-1.410]	0.811	0.994
PFC Exc-DL	DUP	SZ vs Controls	627	8372	32	397	0.980 [0.687-1.396]	0.909	0.944
PFC Exc-UL	DEL	ASD vs Controls	505	8372	19	116	2.126 [1.381-3.273]	6.10e-04	2.00e-03
PFC Exc-UL	DEL	SZ vs Controls	627	8372	10	116	0.985 [0.548-1.768]	0.959	0.991
PFC Exc-UL	DUP	ASD vs Controls	505	8372	18	442	0.758 [0.503-1.141]	0.184	0.994
PFC Exc-UL	DUP	SZ vs Controls	627	8372	27	442	0.787 [0.539-1.149]	0.214	0.944
PFC Inh-CGE	DEL	ASD vs Controls	505	8372	25	164	1.848 [1.281-2.665]	1.02e-03	2.00e-03
PFC Inh-CGE	DEL	SZ vs Controls	627	8372	16	164	1.139 [0.735-1.765]	0.561	0.935
PFC Inh-CGE	DUP	ASD vs Controls	505	8372	23	456	0.930 [0.643-1.344]	0.698	0.994
PFC Inh-CGE	DUP	SZ vs Controls	627	8372	32	456	0.988 [0.703-1.388]	0.944	0.944
PFC Inh-MGE	DEL	ASD vs Controls	505	8372	18	99	2.495 [1.544-4.034]	1.90e-04	1.70e-03
PFC Inh-MGE	DEL	SZ vs Controls	627	8372	11	99	1.197 [0.654-2.191]	0.559	0.935
PFC Inh-MGE	DUP	ASD vs Controls	505	8372	23	428	0.907 [0.610-1.349]	0.629	0.994
PFC Inh-MGE	DUP	SZ vs Controls	627	8372	31	428	0.907 [0.626-1.313]	0.605	0.944

## Sheet: B_PatternB_Sensitivity
Boundary class	SV type	Comparison	n_case	n_control	n_exposed_case	n_exposed_control	OR [95% CI]	P-value	BH-FDR (within stratum)
HPC Exc-CA	DEL	ASD vs Controls	505	8372	12	97	1.671 [0.987-2.828]	0.056	0.062
HPC Exc-CA	DEL	SZ vs Controls	627	8372	5	97	0.828 [0.420-1.635]	0.587	0.734
HPC Exc-CA	DUP	ASD vs Controls	505	8372	22	320	1.127 [0.762-1.668]	0.549	0.843
HPC Exc-CA	DUP	SZ vs Controls	627	8372	23	320	0.972 [0.654-1.444]	0.889	0.916
HPC Exc-DG	DEL	ASD vs Controls	505	8372	15	87	2.641 [1.512-4.613]	6.40e-04	3.10e-03
HPC Exc-DG	DEL	SZ vs Controls	627	8372	7	87	1.160 [0.583-2.308]	0.673	0.748
HPC Exc-DG	DUP	ASD vs Controls	505	8372	17	302	0.952 [0.600-1.508]	0.832	0.843
HPC Exc-DG	DUP	SZ vs Controls	627	8372	17	302	0.814 [0.509-1.300]	0.388	0.916
HPC Exc-ENT	DEL	ASD vs Controls	505	8372	19	129	1.941 [1.255-3.002]	2.89e-03	5.80e-03
HPC Exc-ENT	DEL	SZ vs Controls	627	8372	12	129	1.047 [0.612-1.791]	0.867	0.867
HPC Exc-ENT	DUP	ASD vs Controls	505	8372	19	336	0.917 [0.603-1.395]	0.685	0.843
HPC Exc-ENT	DUP	SZ vs Controls	627	8372	28	336	1.071 [0.741-1.548]	0.714	0.916
HPC Inh-CGE	DEL	ASD vs Controls	505	8372	10	67	2.087 [1.161-3.753]	0.014	0.020
HPC Inh-CGE	DEL	SZ vs Controls	627	8372	10	67	1.449 [0.751-2.794]	0.268	0.537
HPC Inh-CGE	DUP	ASD vs Controls	505	8372	13	240	1.055 [0.653-1.703]	0.827	0.843
HPC Inh-CGE	DUP	SZ vs Controls	627	8372	26	240	1.486 [1.003-2.200]	0.048	0.482
HPC Inh-MGE	DEL	ASD vs Controls	505	8372	7	56	1.904 [1.018-3.559]	0.044	0.055
HPC Inh-MGE	DEL	SZ vs Controls	627	8372	4	56	0.681 [0.245-1.895]	0.462	0.660
HPC Inh-MGE	DUP	ASD vs Controls	505	8372	11	167	0.940 [0.511-1.730]	0.843	0.843
HPC Inh-MGE	DUP	SZ vs Controls	627	8372	11	167	0.784 [0.428-1.437]	0.431	0.916
PFC Astro	DEL	ASD vs Controls	505	8372	9	80	1.488 [0.889-2.490]	0.131	0.131
PFC Astro	DEL	SZ vs Controls	627	8372	11	80	1.879 [1.220-2.896]	4.23e-03	0.042
PFC Astro	DUP	ASD vs Controls	505	8372	17	216	1.191 [0.759-1.868]	0.447	0.843
PFC Astro	DUP	SZ vs Controls	627	8372	17	216	0.965 [0.590-1.578]	0.887	0.916
PFC Exc-DL	DEL	ASD vs Controls	505	8372	18	139	1.806 [1.145-2.847]	0.011	0.018
PFC Exc-DL	DEL	SZ vs Controls	627	8372	17	139	1.371 [0.869-2.163]	0.175	0.437
PFC Exc-DL	DUP	ASD vs Controls	505	8372	30	402	1.145 [0.814-1.611]	0.438	0.843
PFC Exc-DL	DUP	SZ vs Controls	627	8372	33	402	1.030 [0.735-1.443]	0.866	0.916
PFC Exc-UL	DEL	ASD vs Controls	505	8372	19	118	2.031 [1.327-3.108]	1.10e-03	3.10e-03
PFC Exc-UL	DEL	SZ vs Controls	627	8372	15	118	1.240 [0.751-2.046]	0.401	0.660
PFC Exc-UL	DUP	ASD vs Controls	505	8372	22	445	0.826 [0.565-1.208]	0.325	0.843
PFC Exc-UL	DUP	SZ vs Controls	627	8372	28	445	0.791 [0.545-1.147]	0.216	0.916
PFC Inh-CGE	DEL	ASD vs Controls	505	8372	26	170	1.799 [1.259-2.570]	1.25e-03	3.10e-03
PFC Inh-CGE	DEL	SZ vs Controls	627	8372	20	170	1.406 [0.977-2.023]	0.067	0.333
PFC Inh-CGE	DUP	ASD vs Controls	505	8372	26	458	1.039 [0.745-1.448]	0.823	0.843
PFC Inh-CGE	DUP	SZ vs Controls	627	8372	33	458	1.018 [0.732-1.416]	0.916	0.916
PFC Inh-MGE	DEL	ASD vs Controls	505	8372	19	103	2.428 [1.518-3.886]	2.20e-04	2.20e-03
PFC Inh-MGE	DEL	SZ vs Controls	627	8372	16	103	1.488 [0.875-2.531]	0.142	0.437
PFC Inh-MGE	DUP	ASD vs Controls	505	8372	26	432	0.963 [0.664-1.396]	0.841	0.843
PFC Inh-MGE	DUP	SZ vs Controls	627	8372	32	432	0.904 [0.627-1.302]	0.587	0.916

## Sheet: C_PatternC_Sensitivity
Boundary class	SV type	Comparison	n_case	n_control	n_exposed_case	n_exposed_control	OR [95% CI]	P-value	BH-FDR (within stratum)
HPC Exc-CA	DEL	ASD vs Controls	505	8372	6	87	1.060 [0.466-2.411]	0.889	0.921
HPC Exc-CA	DEL	SZ vs Controls	627	8372	3	87	0.403 [0.129-1.263]	0.119	0.939
HPC Exc-CA	DUP	ASD vs Controls	505	8372	15	284	0.849 [0.507-1.423]	0.535	0.595
HPC Exc-CA	DUP	SZ vs Controls	627	8372	20	284	0.886 [0.559-1.405]	0.606	0.850
HPC Exc-DG	DEL	ASD vs Controls	505	8372	10	76	2.335 [1.170-4.659]	0.016	0.081
HPC Exc-DG	DEL	SZ vs Controls	627	8372	5	76	0.812 [0.324-2.034]	0.657	0.939
HPC Exc-DG	DUP	ASD vs Controls	505	8372	11	271	0.630 [0.341-1.164]	0.140	0.476
HPC Exc-DG	DUP	SZ vs Controls	627	8372	15	271	0.787 [0.472-1.314]	0.360	0.850
HPC Exc-ENT	DEL	ASD vs Controls	505	8372	11	110	1.543 [0.835-2.853]	0.167	0.333
HPC Exc-ENT	DEL	SZ vs Controls	627	8372	10	110	1.109 [0.606-2.032]	0.737	0.939
HPC Exc-ENT	DUP	ASD vs Controls	505	8372	15	304	0.734 [0.434-1.242]	0.249	0.476
HPC Exc-ENT	DUP	SZ vs Controls	627	8372	25	304	1.075 [0.722-1.602]	0.722	0.850
HPC Inh-CGE	DEL	ASD vs Controls	505	8372	5	57	1.425 [0.567-3.581]	0.451	0.752
HPC Inh-CGE	DEL	SZ vs Controls	627	8372	8	57	1.602 [0.764-3.356]	0.212	0.939
HPC Inh-CGE	DUP	ASD vs Controls	505	8372	10	220	0.702 [0.366-1.345]	0.286	0.476
HPC Inh-CGE	DUP	SZ vs Controls	627	8372	24	220	1.440 [0.944-2.198]	0.091	0.850
HPC Inh-MGE	DEL	ASD vs Controls	505	8372	2	48	0.676 [0.166-2.757]	0.585	0.836
HPC Inh-MGE	DEL	SZ vs Controls	627	8372	4	48	0.873 [0.315-2.415]	0.793	0.939
HPC Inh-MGE	DUP	ASD vs Controls	505	8372	10	152	1.042 [0.544-1.996]	0.902	0.902
HPC Inh-MGE	DUP	SZ vs Controls	627	8372	9	152	0.726 [0.369-1.427]	0.353	0.850
PFC Astro	DEL	ASD vs Controls	505	8372	4	69	0.830 [0.306-2.245]	0.713	0.891
PFC Astro	DEL	SZ vs Controls	627	8372	5	69	0.804 [0.327-1.977]	0.635	0.939
PFC Astro	DUP	ASD vs Controls	505	8372	10	189	0.783 [0.413-1.485]	0.454	0.568
PFC Astro	DUP	SZ vs Controls	627	8372	14	189	0.950 [0.550-1.638]	0.852	0.852
PFC Exc-DL	DEL	ASD vs Controls	505	8372	8	118	1.038 [0.500-2.155]	0.921	0.921
PFC Exc-DL	DEL	SZ vs Controls	627	8372	8	118	0.914 [0.483-1.728]	0.781	0.939
PFC Exc-DL	DUP	ASD vs Controls	505	8372	20	360	0.821 [0.517-1.306]	0.405	0.568
PFC Exc-DL	DUP	SZ vs Controls	627	8372	30	360	1.060 [0.723-1.554]	0.765	0.850
PFC Exc-UL	DEL	ASD vs Controls	505	8372	11	101	1.616 [0.867-3.013]	0.131	0.328
PFC Exc-UL	DEL	SZ vs Controls	627	8372	9	101	1.001 [0.509-1.968]	0.997	0.997
PFC Exc-UL	DUP	ASD vs Controls	505	8372	13	405	0.493 [0.286-0.850]	0.011	0.109
PFC Exc-UL	DUP	SZ vs Controls	627	8372	25	405	0.823 [0.550-1.232]	0.344	0.850
PFC Inh-CGE	DEL	ASD vs Controls	505	8372	19	147	2.116 [1.308-3.424]	2.25e-03	0.022
PFC Inh-CGE	DEL	SZ vs Controls	627	8372	14	147	1.057 [0.607-1.841]	0.845	0.939
PFC Inh-CGE	DUP	ASD vs Controls	505	8372	21	424	0.757 [0.485-1.181]	0.220	0.476
PFC Inh-CGE	DUP	SZ vs Controls	627	8372	30	424	0.935 [0.641-1.363]	0.727	0.850
PFC Inh-MGE	DEL	ASD vs Controls	505	8372	11	88	1.949 [1.009-3.762]	0.047	0.156
PFC Inh-MGE	DEL	SZ vs Controls	627	8372	9	88	1.181 [0.608-2.292]	0.624	0.939
PFC Inh-MGE	DUP	ASD vs Controls	505	8372	19	387	0.739 [0.455-1.199]	0.220	0.476
PFC Inh-MGE	DUP	SZ vs Controls	627	8372	28	387	0.905 [0.604-1.356]	0.629	0.850

## Sheet: D_ExonExclusion_Sensitivity
Analysis	Comparison	SV type	Bin type / restriction	Cohort	Model	OR [95% CI]	Two-sided P-value	2-test BH-FDR (discovery)	n_case	n_control	n_exposed_case	n_exposed_control	Role in v208 framework
A1: Exon-free bins (separate model)	ASD vs Controls	DEL	exonfree	Discovery WGS	Firth-penalised B'-adjusted logistic	1.475 [1.106-1.967]	8.24e-03	0.016	505	8372	27	253	Primary confirmatory
A2: Exon-free bins (joint model with exon-overlap)	ASD vs Controls	DEL	exonfree	Discovery WGS	B'-adjusted logistic regression (joint model)	1.333 [0.972-1.828]	0.075	0.075	505	8372	27	253	Supporting mechanistic
Note: Two-test confirmatory family (A1 primary + A2 supporting), with Holm correction over two MSSNG one-sided replication P-values. Discovery rows use Firth-penalised B'-adjusted logistic regression for A1 and standard B'-adjusted logistic regression (joint model) for A2; MSSNG replication uses GEE with family-level clustering. Discovery BH-FDR is reported as a descriptive discovery-stage measur…

## Sheet: E_Multinomial_Heterogeneity
Boundary class	SV type	n_case_ASD	n_case_SZ	n_control	β_ASD	SE_ASD	β_SZ	SE_SZ	Cov(β_ASD, β_SZ)	z_het	P_het two-sided	OR_diff [95% CI]	Role	Note
HPC Exc-CA	DEL	505	627	8372	0.570	0.263	-0.110	0.345	0.0103	1.663	0.096	1.975 [0.885-4.406]	Heterogeneity
HPC Exc-DG	DEL	505	627	8372	1.007	0.277	0.198	0.345	0.0141	1.975	0.048 *	2.244 [1.006-5.006]	Heterogeneity
HPC Exc-ENT	DEL	505	627	8372	0.759	0.222	0.156	0.270	0.0090	1.864	0.062	1.827 [0.970-3.441]	Heterogeneity
HPC Inh-CGE	DEL	505	627	8372	0.832	0.300	0.411	0.323	0.0235	1.097	0.273	1.523 [0.718-3.230]	Heterogeneity
HPC Inh-MGE	DEL	505	627	8372	0.681	0.325	-0.328	0.504	0.0168	1.768	0.077	2.742 [0.896-8.390]	Heterogeneity
PFC Astro	DEL	505	627	8372	0.420	0.269	-0.034	0.366	0.0150	1.080	0.280	1.575 [0.691-3.591]	Heterogeneity
PFC Exc-DL	DEL	505	627	8372	0.630	0.234	0.068	0.272	0.0078	1.673	0.094	1.756 [0.908-3.394]	Heterogeneity
PFC Exc-UL	DEL	505	627	8372	0.766	0.219	-0.034	0.299	0.0084	2.306	0.021 *	2.226 [1.128-4.396]	Heterogeneity
PFC Inh-CGE	DEL	505	627	8372	0.624	0.184	0.134	0.223	0.0074	1.871	0.061	1.632 [0.977-2.726]	Heterogeneity
PFC Inh-MGE	DEL	505	627	8372	0.913	0.243	0.167	0.301	0.0108	2.082	0.037 *	2.108 [1.045-4.256]	Heterogeneity
HPC Exc-CA	DUP	505	627	8372	-0.006	0.222	-0.068	0.210	0.0031	0.209	0.835	1.064 [0.597-1.896]	DUP (negative control)
HPC Exc-DG	DUP	505	627	8372	-0.102	0.246	-0.241	0.243	0.0035	0.413	0.679	1.149 [0.595-2.219]	DUP (negative control)
HPC Exc-ENT	DUP	505	627	8372	-0.191	0.236	0.034	0.194	0.0028	-0.760	0.447	0.798 [0.447-1.427]	DUP (negative control)
HPC Inh-CGE	DUP	505	627	8372	-0.175	0.289	0.361	0.204	0.0042	-1.571	0.116	0.585 [0.300-1.142]	DUP (negative control)
HPC Inh-MGE	DUP	505	627	8372	0.005	0.313	-0.214	0.310	0.0059	0.514	0.607	1.246 [0.539-2.876]	DUP (negative control)
PFC Astro	DUP	505	627	8372	-0.035	0.267	-0.071	0.258	0.0046	0.101	0.920	1.037 [0.513-2.096]	DUP (negative control)
PFC Exc-DL	DUP	505	627	8372	-0.052	0.201	-0.018	0.181	0.0024	-0.130	0.897	0.967 [0.579-1.614]	DUP (negative control)
PFC Exc-UL	DUP	505	627	8372	-0.275	0.209	-0.232	0.191	0.0021	-0.156	0.876	0.958 [0.558-1.644]	DUP (negative control)
PFC Inh-CGE	DUP	505	627	8372	-0.064	0.187	-0.009	0.169	0.0021	-0.225	0.822	0.947 [0.587-1.526]	DUP (negative control)
PFC Inh-MGE	DUP	505	627	8372	-0.094	0.203	-0.096	0.187	0.0024	0.009	0.993	1.002 [0.593-1.693]	DUP (negative control)
Secondary class-level global directional consistency (DEL)
Correlation-adjusted Stouffer Z-method (Brown’s variance correction)	DEL	505	627	8372						2.507	P_one-sided = 6.09e-03		Global	sum_z = 2.507, var_adj = 48.06, mean rho = 0.423
Binomial sign test	DEL	505	627	8372							P_one-sided = 9.77e-04		Global	10 of 10 classes ASD > SZ
Secondary class-level global directional consistency (DUP, negative control)
Correlation-adjusted Stouffer Z-method	DUP	505	627	8372						-0.248	P_one-sided = 0.598		Global (DUP)	mean rho = 0.349
Binomial sign test	DUP	505	627	8372							P_one-sided = 0.623		Global (DUP)	5 of 10 classes ASD > SZ
Note: Pattern A only. The 10-class ASD-vs-SZ heterogeneity summary was treated as a secondary class-level directional-consistency family, separate from the aggregate architecture-level ASD-vs-SZ contrast. Outcome coding: Controls = 0 (baseline), ASD = 1, SZ = 2 (multinomial logistic, Newton solver). See Supplementary Table 6, Panel E for the parallel arrayCGH Phase 6C analysis.

## Sheet: F_SexSensitivity_TAD
Panel F. Exploratory sex-stratified and sex × case interaction analyses for aggregate Diff_any-DEL burden
Comparison	Analysis	Sex stratum	N case	N control	Exposed cases	Exposed controls	OR [95% CI]	P value	Interaction OR [95% CI]	Interaction P	Note
ASD vs Controls	(A) Sex × case interaction	Both (pooled)	505	8372	50	430			0.75 [0.48–1.19]	0.229	Interaction tests sex-differential Diff_any-DEL effect
ASD vs Controls	(B) Sex-stratified	Male	374	4107	35	217	1.56 [1.14–2.13]	0.006			B′ covariates; Sex term removed (stratified)
ASD vs Controls	(C) Sex-stratified	Female	131	4265	15	213	2.10 [1.33–3.31]	0.0015			Underpowered (15 female carriers)
SZ vs Controls	(A) Sex × case interaction	Both (pooled)	627	8372	39	430			0.81 [0.48–1.36]	0.424	No sex-differential SZ effect
SZ vs Controls	(B) Sex-stratified	Male	337	4107	18	217	0.89 [0.60–1.33]	0.571			No SZ effect in either sex
SZ vs Controls	(C) Sex-stratified	Female	290	4265	21	213	1.36 [0.91–2.04]	0.137			No SZ effect in either sex
Notes:
Exposure: aggregate Diff_any (count) = n_events_group_primary__Diff_specific_n1_DEL + n_events_group_primary__Diff_shared_n2plus_DEL (same as primary endpoint).
Covariates: same B′ framework as primary aggregate analysis (Sex_numeric + PC1–PC10 + log1p_total_del_bases + log1p_total_gene_DEL). Sex-stratified models omitted the Sex_numeric covariate; interaction models evaluated a Diff_any:Sex_numeric interaction term.
Sex encoding: 1 = male, 0 = female. ASD case Male/Female = 374/131; SZ case Male/Female = 337/290; Controls Male/Female = 4,107/4,265.
Two-sided Wald P-values. ASD female-stratified OR was numerically higher than male-stratified (2.10 vs 1.56), but the formal sex × case interaction test was not significant (P = 0.229), and female ASD carrier counts were limited.
These analyses were exploratory and were not used for primary inference. All carriers refer to samples with Diff_any ≥ 1 event.
