# Supplementary material
Source: Research Square preprint supplement (doi:10.21203/rs.3.rs-9869940/v1)
Supplement: Supplementary file 4 [file 60568198629e7712e6fb71ff.xlsx]

## Sheet: Legend
Supplementary Table 6. Cell-type-resolved TAD boundary disruption analyses.
Panel A. Aggregate Diff_any external support and per-class external replication of discovery-positive boundary classes (arrayCGH case-control + MSSNG family-based; fixed-effect IVW meta-analysis). Aggregate row at top; per-class secondary localization rows below.
Panel B. Discovery-internal matched-static specificity for the aggregate Diff_any union (top, bold) and per-class exploratory rows (bottom). 4,980-bin universe; 10,000 resamples; both per-individual-burden OR and event-level OR are reported.
Panel C. Boundary-type specificity (Diff_any vs Static per-bin) under external two-cohort IVW.
Panel D. Aggregate exon-exclusion sensitivity (A1 exon-free; A2 joint co-exposure model).
Panel E. ASD-vs-SZ heterogeneity at the aggregate Diff_any endpoint (top) and per-class Stouffer secondary localization (below).
Panel F. Representative loci (SMARCA2 / NFIB / AUTS2) — exploratory locus illustration.
Panel G. Constraint enrichment at Diff_any-bounded TAD-scale regulatory domains (3-cohort IVW).
Panel H. Per-cohort exact direct-overlap exclusion summary supporting the DirectExcl sensitivity analysis.
Panel I. Distance-window sensitivity (Group E).
Panel J. Static-bounded domain reconstruction sensitivity (descriptive; not a scale-matched null).
Panel K. WGS component-consistency and post-hoc power checks relative to the independent external two-cohort estimate.
Panel L. Aggregate-signal robustness (4 layers): standard LOCO, strict LOCO, top-N high-burden sample exclusion, and top-N deletion event exclusion for the ASD-DEL aggregate Diff_any endpoint (renamed from former Panel K′ in v46/R23).
Panel M. Halvorsen 40-kb TAD-boundary comparator with parallel Adult and Fetal flagged-column analyses (TADbAdult/TADbFetal; ASD/SZ × DEL/DUP burden + ASD-vs-SZ heterogeneity MNLogit; 12 rows).

## Sheet: A_Replication
Boundary class	Analysis set	arrayCGH OR [95% CI]	arrayCGH two-sided P	MSSNG OR [95% CI]	MSSNG two-sided P	IVW meta OR [95% CI]	IVW meta two-sided P	IVW meta one-sided P	One-sided BH-FDR (9-class family)	I²	Cochran Q P	Confirmatory status	arrayCGH n_case	arrayCGH n_ctrl	MSSNG n_case	MSSNG n_ctrl
Aggregate Diff_any (4,980 bins)	Aggregate primary	1.200 [1.031–1.397]	0.0187	1.645 [1.102–2.456]	0.015	1.248 [1.083–1.439]	0.00221	0.0011		51.9%	0.149	Aggregate primary support	838	3583	5955	511
Per-class secondary localization (9 discovery-positive classes; one-sided BH-FDR within 9-class family)
HPC Exc-DG	Confirmatory	1.009 [0.491–2.075]	0.980	1.658 [0.678–4.058]	0.268	1.227 [0.700–2.151]	0.475	0.238	0.238	0.00	0.397	Failed	838	3583	5955	511
PFC Inh-MGE	Confirmatory	1.498 [0.906–2.477]	0.115	3.472 [1.221–9.867]	0.020	1.755 [1.116–2.761]	0.015	0.007	0.017	0.50	0.155	Passed	838	3583	5955	511
HPC Inh-CGE	Confirmatory	2.012 [1.026–3.945]	0.042	4.180 [1.140–15.323]	0.031	2.349 [1.292–4.271]	0.005	0.003	0.011	0.00	0.327	Passed	838	3583	5955	511
HPC Exc-ENT	Confirmatory	1.389 [0.853–2.261]	0.186	2.201 [1.028–4.710]	0.042	1.588 [1.054–2.394]	0.027	0.014	0.019	0.00	0.318	Passed	838	3583	5955	511
PFC Exc-UL	Confirmatory	1.419 [0.945–2.130]	0.092	2.252 [1.040–4.878]	0.040	1.568 [1.094–2.247]	0.014	0.007	0.017	0.07	0.300	Passed	838	3583	5955	511
HPC Inh-MGE	Confirmatory	1.524 [0.729–3.186]	0.263	2.102 [0.646–6.839]	0.217	1.668 [0.892–3.117]	0.109	0.054	0.061	0.00	0.650	Failed	838	3583	5955	511
PFC Exc-DL	Confirmatory	2.063 [1.341–3.174]	9.86e-04	2.605 [1.135–5.979]	0.024	2.168 [1.479–3.178]	7.36e-05	3.68e-05	3.31e-04	0.00	0.625	Passed	838	3583	5955	511
PFC Inh-CGE	Confirmatory	1.379 [0.918–2.071]	0.121	1.915 [0.994–3.690]	0.052	1.511 [1.069–2.134]	0.019	0.010	0.017	0.00	0.404	Passed	838	3583	5955	511
HPC Exc-CA	Confirmatory	1.383 [0.910–2.102]	0.130	1.839 [0.917–3.686]	0.086	1.492 [1.042–2.135]	0.029	0.014	0.019	0.00	0.491	Passed	838	3583	5955	511
PFC Astro	Discovery-null	1.857 [1.118–3.084]	0.017	1.665 [0.831–3.333]	0.150	1.787 [1.187–2.692]	0.005	0.003	N/A (discovery-null)	0.00	0.803	N/A (discovery-null)	838	3583	5955	511
Footnote: The aggregate Diff_any row (top, highlighted) is the architecture-level external support endpoint and is not part of the nine-class confirmatory BH-FDR family. The 'One-sided BH-FDR (9-class family)' column applies only to the per-class confirmatory rows (i.e., the nine discovery-positive boundary classes); PFC Astro is a discovery-null class shown for completeness.

## Sheet: B_MatchedStatic
Boundary class	n_differential_bins	n_static_pool_bins	Observed OR	Observed OR [95% CI]	Wald P	Matched-static OR (median)	Matched-static OR [95% CI of resampled distribution]	Empirical P (OR)	Observed event-level OR	Matched-static event-level OR (mean) [95% CI]	Empirical P (event-level OR)	n_resamples
Differential union (aggregate Diff_any)	4980	43680	1.433	1.433 [1.211–1.696]	2.88e-05	1.297	1.196–1.417	0.0157	2.121	1.418 [1.092–1.797]	0.0004	10000
HPC Exc-CA	851	43680	1.769	1.769 [1.038–3.013]	0.0359	1.561	1.065–2.255	0.254	2.255	1.819 [1.060–2.776]	0.153	10000
HPC Exc-DG	626	43680	2.785	2.785 [1.590–4.877]	0.00034	1.710	1.099–2.522	0.008	3.163	1.956 [1.100–3.035]	0.0155	10000
HPC Exc-ENT	957	43680	2.128	2.128 [1.369–3.307]	0.000785	1.559	1.131–2.145	0.0278	2.675	1.776 [1.093–2.619]	0.0191	10000
HPC Inh-CGE	709	43680	2.215	2.215 [1.210–4.056]	0.00995	1.836	1.225–2.685	0.167	2.786	2.133 [1.240–3.258]	0.11	10000
HPC Inh-MGE	522	43680	1.952	1.952 [1.036–3.677]	0.0385	1.665	0.971–2.654	0.262	2.356	1.994 [1.014–3.260]	0.242	10000
PFC Astro	748	43680	1.499	1.499 [0.885–2.540]	0.132	1.645	1.101–2.336	0.685	1.738	1.837 [1.078–2.773]	0.561	10000
PFC Exc-DL	1183	43680	1.922	1.922 [1.197–3.085]	0.00683	1.577	1.186–2.079	0.0813	2.262	1.738 [1.126–2.473]	0.0757	10000
PFC Exc-UL	1195	43680	2.126	2.126 [1.381–3.273]	0.000614	1.601	1.207–2.102	0.0204	2.686	1.777 [1.169–2.510]	0.0103	10000
PFC Inh-CGE	1401	43680	1.848	1.848 [1.281–2.665]	0.00102	1.512	1.180–1.949	0.0585	2.786	1.700 [1.127–2.386]	0.0022	10000
PFC Inh-MGE	1136	43680	2.495	2.495 [1.544–4.034]	0.000191	1.593	1.205–2.117	0.0016	3.211	1.780 [1.156–2.559]	0.0007	10000
Note: Matched-static resampling used a single L2-primary specification with exact matching on chromosome, gene-density bin, and segmental-duplication bin, with local progressive relaxation to chromosome + gene-density and chromosome-only candidate pools when the exact-match pool contained fewer than 10 static bins. Empirical P-values were computed with a pseudo-count adjustment, (1 + number of re…

## Sheet: C_DiffAnyVsStatic
Category	Cohort	OR [95% CI]	two-sided P	one-sided P	n_case	n_ctrl	carrier_case	carrier_ctrl	Note
Diff_any	arrayCGH	1.200 [1.031–1.397]	0.019		838	3583	70	196	B′-adjusted logistic regression, per-bin n_boundary exposure
Diff_any	MSSNG (GEE)	1.645 [1.102–2.456]	0.015		5955	511	411	16	GEE Binomial Independence; n_families = 4978
Diff_any	IVW fixed-effect meta	1.248 [1.083–1.439]	0.002	0.001					I² = 51.9%, Cochran Q P = 0.149
Static	arrayCGH	1.012 [1.000–1.024]	0.050		838	3583	337	1203	B′-adjusted logistic regression, per-bin n_boundary exposure
Static	MSSNG (GEE)	1.042 [1.009–1.076]	0.013		5955	511	2092	184	GEE Binomial Independence; n_families = 4978
Static	IVW fixed-effect meta	1.015 [1.004–1.027]	0.007	0.003					I² = 64.0%, Cochran Q P = 0.095
									Note: The Diff_any per-bin log-odds estimate was substantially larger than the Static estimate; this descriptive comparison is not a formal coefficient-contrast test.

## Sheet: D_ExonExclusion
Analysis	Role	Cohort	Model	OR [95% CI]	two-sided P	one-sided P	2-test BH-FDR (discovery)	2-test Holm-adjusted one-sided P (MSSNG)	n_case	n_ctrl	carrier_case	carrier_ctrl
A1 (exon-free bin, separate model)	Primary	MSSNG WGS (replication)	GEE Binomial Independence, family-clustered	1.990 [1.167–3.392]	0.011	0.006		0.011	5955	511	220	9
A2 (exon-free + exon-overlap joint)	Supporting mechanistic	MSSNG WGS (replication)	GEE Binomial Independence, family-clustered (joint model)	1.737 [0.978–3.086]	0.059	0.030		0.030	5955	511	220	9
Note: Two-test exon-exclusion replication in the MSSNG WGS cohort (5,955 ASD probands / 511 unaffected siblings from 4,978 families), fitted by GEE with binomial family, independence working correlation, and family-level clustering (FAMILYID). Holm correction applied over the two MSSNG one-sided replication P-values (A1_MSSNG and A2_MSSNG). Discovery WGS results are in Supplementary Table 5, Pane…

## Sheet: E_ASDvsSZ
Cohort / block	Stratum	Boundary class	N_case	N_control	N_exposed_case	N_exposed_control	OR [95% CI] or OR_diff [95% CI]	Two-sided P	Significance	Note
Aggregate Diff_any ASD-vs-SZ direct contrast (B′ logistic; case=ASD, ctrl=SZ)
WGS Discovery	Aggregate Diff_any	DEL	505	627	50	39	1.310 [1.049–1.635]	0.0172	*	BH q = 0.0343
WGS Discovery	Aggregate Diff_any	DUP	505	627	64	89	1.006 [0.835–1.212]	0.949	ns	BH q = 0.949
Per-class Stouffer secondary localization (correlation-adjusted Stouffer Z + sign test across 10 L2 classes)
Block E1: ArrayCGH SZ-vs-Control binary burden (10 classes x DEL). Primary model: pooled B' logistic with platform covariate. Sensitivity: platform-stratified (Agilent-only, NimbleGen-only).
arrayCGH (SZ-vs-Control)	Pooled (primary)	HPC Exc-CA	2683	3583	48	41	1.053 [0.754–1.470]	0.761
arrayCGH (SZ-vs-Control)	Pooled (primary)	HPC Exc-DG	2683	3583	51	60	1.101 [0.805–1.505]	0.544
arrayCGH (SZ-vs-Control)	Pooled (primary)	HPC Exc-ENT	2683	3583	74	64	1.294 [0.957–1.749]	0.089
arrayCGH (SZ-vs-Control)	Pooled (primary)	HPC Inh-CGE	2683	3583	44	36	1.297 [0.854–1.970]	0.216
arrayCGH (SZ-vs-Control)	Pooled (primary)	HPC Inh-MGE	2683	3583	42	27	1.486 [0.906–2.438]	0.113
arrayCGH (SZ-vs-Control)	Pooled (primary)	PFC Astro	2683	3583	58	51	1.229 [0.893–1.691]	0.199
arrayCGH (SZ-vs-Control)	Pooled (primary)	PFC Exc-DL	2683	3583	90	73	1.330 [0.991–1.784]	0.051
arrayCGH (SZ-vs-Control)	Pooled (primary)	PFC Exc-UL	2683	3583	83	73	1.248 [0.934–1.669]	0.129
arrayCGH (SZ-vs-Control)	Pooled (primary)	PFC Inh-CGE	2683	3583	90	64	1.495 [1.112–2.011]	5.21e-03 *	*	Nominal (two-sided P < 0.05)
arrayCGH (SZ-vs-Control)	Pooled (primary)	PFC Inh-MGE	2683	3583	70	47	1.601 [1.125–2.278]	6.57e-03 *	*	Nominal (two-sided P < 0.05)
arrayCGH (SZ-vs-Control)	Agilent-only (sensitivity)	HPC Exc-CA	1504	2760			0.948 [0.621–1.447]	0.803
arrayCGH (SZ-vs-Control)	Agilent-only (sensitivity)	HPC Exc-DG	1504	2760			1.078 [0.749–1.552]	0.686
arrayCGH (SZ-vs-Control)	Agilent-only (sensitivity)	HPC Exc-ENT	1504	2760			1.116 [0.795–1.566]	0.525
arrayCGH (SZ-vs-Control)	Agilent-only (sensitivity)	HPC Inh-CGE	1504	2760			1.243 [0.725–2.130]	0.423
arrayCGH (SZ-vs-Control)	Agilent-only (sensitivity)	HPC Inh-MGE	1504	2760			1.451 [0.773–2.726]	0.245
arrayCGH (SZ-vs-Control)	Agilent-only (sensitivity)	PFC Astro	1504	2760			1.131 [0.776–1.647]	0.519
arrayCGH (SZ-vs-Control)	Agilent-only (sensitivity)	PFC Exc-DL	1504	2760			1.261 [0.876–1.814]	0.203
arrayCGH (SZ-vs-Control)	Agilent-only (sensitivity)	PFC Exc-UL	1504	2760			1.207 [0.842–1.730]	0.301
arrayCGH (SZ-vs-Control)	Agilent-only (sensitivity)	PFC Inh-CGE	1504	2760			1.745 [1.191–2.558]	2.46e-03 *	*	Nominal (two-sided P < 0.05)
arrayCGH (SZ-vs-Control)	Agilent-only (sensitivity)	PFC Inh-MGE	1504	2760			1.555 [1.011–2.390]	0.037 *	*	Nominal (two-sided P < 0.05)
arrayCGH (SZ-vs-Control)	NimbleGen-only (sensitivity)	HPC Exc-CA					1.238 [0.699–2.193]	0.454
arrayCGH (SZ-vs-Control)	NimbleGen-only (sensitivity)	HPC Exc-DG					1.154 [0.620–2.147]	0.647
arrayCGH (SZ-vs-Control)	NimbleGen-only (sensitivity)	HPC Exc-ENT					2.088 [1.058–4.119]	0.024 *	*	Nominal (two-sided P < 0.05)
arrayCGH (SZ-vs-Control)	NimbleGen-only (sensitivity)	HPC Inh-CGE					1.370 [0.698–2.690]	0.351
arrayCGH (SZ-vs-Control)	NimbleGen-only (sensitivity)	HPC Inh-MGE					1.510 [0.678–3.361]	0.302
arrayCGH (SZ-vs-Control)	NimbleGen-only (sensitivity)	PFC Astro					1.442 [0.782–2.661]	0.226
arrayCGH (SZ-vs-Control)	NimbleGen-only (sensitivity)	PFC Exc-DL					1.445 [0.874–2.388]	0.138
arrayCGH (SZ-vs-Control)	NimbleGen-only (sensitivity)	PFC Exc-UL					1.322 [0.804–2.175]	0.262
arrayCGH (SZ-vs-Control)	NimbleGen-only (sensitivity)	PFC Inh-CGE					1.131 [0.709–1.805]	0.601
arrayCGH (SZ-vs-Control)	NimbleGen-only (sensitivity)	PFC Inh-MGE					1.661 [0.896–3.082]	0.095
Block E2: ArrayCGH ASD-vs-SZ MNLogit heterogeneity (10 classes x DEL). Primary: pooled MNLogit with platform covariate (n=838 ASD / 2,683 SZ / 3,583 controls). Sensitivity: platform-stratified without platform covariate.
arrayCGH (ASD-vs-SZ)	Pooled (primary)	HPC Exc-CA	838	2683			1.413 [0.954–2.093]	0.084		OR_diff = exp(β_ASD − β_SZ)
arrayCGH (ASD-vs-SZ)	Pooled (primary)	HPC Exc-DG	838	2683			0.986 [0.610–1.594]	0.953		OR_diff = exp(β_ASD − β_SZ)
arrayCGH (ASD-vs-SZ)	Pooled (primary)	HPC Exc-ENT	838	2683			1.032 [0.698–1.525]	0.875		OR_diff = exp(β_ASD − β_SZ)
arrayCGH (ASD-vs-SZ)	Pooled (primary)	HPC Inh-CGE	838	2683			1.205 [0.722–2.012]	0.476		OR_diff = exp(β_ASD − β_SZ)
arrayCGH (ASD-vs-SZ)	Pooled (primary)	HPC Inh-MGE	838	2683			1.107 [0.604–2.030]	0.741		OR_diff = exp(β_ASD − β_SZ)
arrayCGH (ASD-vs-SZ)	Pooled (primary)	PFC Astro	838	2683			1.237 [0.837–1.829]	0.287		OR_diff = exp(β_ASD − β_SZ)
arrayCGH (ASD-vs-SZ)	Pooled (primary)	PFC Exc-DL	838	2683			1.367 [0.993–1.884]	0.055		OR_diff = exp(β_ASD − β_SZ)
arrayCGH (ASD-vs-SZ)	Pooled (primary)	PFC Exc-UL	838	2683			1.174 [0.820–1.682]	0.381		OR_diff = exp(β_ASD − β_SZ)
arrayCGH (ASD-vs-SZ)	Pooled (primary)	PFC Inh-CGE	838	2683			0.978 [0.697–1.372]	0.898		OR_diff = exp(β_ASD − β_SZ)
arrayCGH (ASD-vs-SZ)	Pooled (primary)	PFC Inh-MGE	838	2683			1.093 [0.736–1.623]	0.661		OR_diff = exp(β_ASD − β_SZ)
arrayCGH GLOBAL	Pooled (primary)	Correlation-adjusted Stouffer Z-method (Brown variance correction)					Z = 0.977	P_one-sided = 0.164		10-class secondary class-level directional-consistency summary
arrayCGH GLOBAL	Pooled (primary)	Binomial sign test					8/10 classes ASD > SZ	P_one-sided = 0.055		10-class directional consistency test
arrayCGH (ASD-vs-SZ)	Agilent-only (sensitivity)	HPC Exc-CA	514	1504			1.482 [0.859–2.558]	0.158		OR_diff = exp(β_ASD − β_SZ)
arrayCGH (ASD-vs-SZ)	Agilent-only (sensitivity)	HPC Exc-DG	514	1504			0.904 [0.473–1.730]	0.762		OR_diff = exp(β_ASD − β_SZ)
arrayCGH (ASD-vs-SZ)	Agilent-only (sensitivity)	HPC Exc-ENT	514	1504			0.958 [0.576–1.594]	0.870		OR_diff = exp(β_ASD − β_SZ)
arrayCGH (ASD-vs-SZ)	Agilent-only (sensitivity)	HPC Inh-CGE	514	1504			1.401 [0.719–2.729]	0.322		OR_diff = exp(β_ASD − β_SZ)
arrayCGH (ASD-vs-SZ)	Agilent-only (sensitivity)	HPC Inh-MGE	514	1504			1.277 [0.584–2.792]	0.541		OR_diff = exp(β_ASD − β_SZ)
arrayCGH (ASD-vs-SZ)	Agilent-only (sensitivity)	PFC Astro	514	1504			1.084 [0.633–1.857]	0.769		OR_diff = exp(β_ASD − β_SZ)
arrayCGH (ASD-vs-SZ)	Agilent-only (sensitivity)	PFC Exc-DL	514	1504			1.479 [0.971–2.252]	0.068		OR_diff = exp(β_ASD − β_SZ)
arrayCGH (ASD-vs-SZ)	Agilent-only (sensitivity)	PFC Exc-UL	514	1504			1.236 [0.782–1.952]	0.365		OR_diff = exp(β_ASD − β_SZ)
arrayCGH (ASD-vs-SZ)	Agilent-only (sensitivity)	PFC Inh-CGE	514	1504			0.774 [0.453–1.321]	0.347		OR_diff = exp(β_ASD − β_SZ)
arrayCGH (ASD-vs-SZ)	Agilent-only (sensitivity)	PFC Inh-MGE	514	1504			1.114 [0.673–1.843]	0.675		OR_diff = exp(β_ASD − β_SZ)
arrayCGH GLOBAL	Agilent-only (sensitivity)	Correlation-adjusted Stouffer Z-method (Brown variance correction)					Z = 0.686	P_one-sided = 0.246		10-class secondary class-level directional-consistency summary
arrayCGH GLOBAL	Agilent-only (sensitivity)	Binomial sign test					7/10 classes ASD > SZ	P_one-sided = 0.172		10-class directional consistency test
arrayCGH (ASD-vs-SZ)	NimbleGen-only (sensitivity)	HPC Exc-CA	324	1179			1.344 [0.753–2.399]	0.318		OR_diff = exp(β_ASD − β_SZ)
arrayCGH (ASD-vs-SZ)	NimbleGen-only (sensitivity)	HPC Exc-DG	324	1179			1.139 [0.535–2.422]	0.736		OR_diff = exp(β_ASD − β_SZ)
arrayCGH (ASD-vs-SZ)	NimbleGen-only (sensitivity)	HPC Exc-ENT	324	1179			1.213 [0.627–2.347]	0.566		OR_diff = exp(β_ASD − β_SZ)
arrayCGH (ASD-vs-SZ)	NimbleGen-only (sensitivity)	HPC Inh-CGE	324	1179			0.960 [0.419–2.199]	0.924		OR_diff = exp(β_ASD − β_SZ)
arrayCGH (ASD-vs-SZ)	NimbleGen-only (sensitivity)	HPC Inh-MGE	324	1179			0.906 [0.349–2.354]	0.839		OR_diff = exp(β_ASD − β_SZ)
arrayCGH (ASD-vs-SZ)	NimbleGen-only (sensitivity)	PFC Astro	324	1179			1.524 [0.827–2.811]	0.177		OR_diff = exp(β_ASD − β_SZ)
arrayCGH (ASD-vs-SZ)	NimbleGen-only (sensitivity)	PFC Exc-DL	324	1179			1.231 [0.746–2.032]	0.417		OR_diff = exp(β_ASD − β_SZ)
arrayCGH (ASD-vs-SZ)	NimbleGen-only (sensitivity)	PFC Exc-UL	324	1179			1.089 [0.607–1.953]	0.775		OR_diff = exp(β_ASD − β_SZ)
arrayCGH (ASD-vs-SZ)	NimbleGen-only (sensitivity)	PFC Inh-CGE	324	1179			1.245 [0.775–1.999]	0.365		OR_diff = exp(β_ASD − β_SZ)
arrayCGH (ASD-vs-SZ)	NimbleGen-only (sensitivity)	PFC Inh-MGE	324	1179			1.067 [0.562–2.028]	0.842		OR_diff = exp(β_ASD − β_SZ)
arrayCGH GLOBAL	NimbleGen-only (sensitivity)	Correlation-adjusted Stouffer Z-method (Brown variance correction)					Z = 0.750	P_one-sided = 0.227		10-class secondary class-level directional-consistency summary
arrayCGH GLOBAL	NimbleGen-only (sensitivity)	Binomial sign test					8/10 classes ASD > SZ	P_one-sided = 0.055		10-class directional consistency test
Note: Panel E reports arrayCGH external cross-disorder analyses. Block E1: SZ-vs-Control binary deletion burden by B' logistic regression adjusting for sex, log1p(total_bases), log1p(total_gene); pooled primary (with platform covariate) plus platform-stratified Agilent-only and NimbleGen-only sensitivity analyses. Two boundary classes reached nominal two-sided P < 0.05 in the pooled primary: PFC …

## Sheet: F_RepresentativeLoci
Locus	Cytoband	Deletion coordinates (hg38)	Deletion size	Sample ID	Differential boundary L2 class	Boundary specificity	Genes within flanking TAD domain	Gene LOEUF	Curated ASD/NDD	SFARI 1–2	Deletion relative to gene	Note
SMARCA2	9p24.3	chr9:1,584,974–1,779,473	194 kb	Sample_1945	Diff_specific_n1: PFC Exc-DL	Restricted (single L2 class)	SMARCA2	SMARCA2 = 0.203	Yes (curated NDD/ASD gene)	Yes (SFARI 1)	Intergenic, ∼200 kb upstream of SMARCA2 gene start (no overlap with the SMARCA2 gene body)	Illustrative example of a single-L2 cell-type-differential boundary disruption in a discovery WGS sample, with SMARCA2 (Nicolaides-Baraitser syndrome; LOEUF=0.20; SFARI 1) as the flanking constrained NDD gene.
NFIB	9p23	chr9:15,816,668–15,968,472	152 kb	Sample_266	HPC Exc-DG	Restricted (single L2 class)	NFIB	NFIB = 0.225	Yes (curated NDD gene)	Yes	Intergenic, ∼1.4 Mb downstream of NFIB (not overlapping the NFIB gene body)	Illustrative example of a single-L2 cell-type-differential boundary disruption in a non-coding locus ~1.4 Mb downstream of a constrained NDD gene.
AUTS2	7q11.22	chr7:68,662,140–68,961,013	299 kb	Sample_1596	PFC Astro	Restricted (single L2 class)	AUTS2	AUTS2 = 0.253	Yes (curated ASD/NDD gene)	Yes	Intergenic, ∼0.6 Mb upstream of AUTS2 (not overlapping the AUTS2 gene body)	Illustrative example of a single-L2 cell-type-differential boundary disruption in a non-coding locus ~0.6 Mb upstream of a constrained ASD/NDD gene. Note: the PFC Astro class is discovery-null in the ASD-vs-Control confirmatory family, but the boundary bin is a valid Diff_any annotation and this locus is shown as exploratory illustration only.
Note: The three loci shown here correspond to Fig. 3f genomic schematics. Locus annotation was performed for the representative examples using TAD domains reconstructed from the Heffel L2 boundary data and screening within-domain protein-coding genes against curated ASD/NDD gene sets. This table is provided as locus-level reference data for the representative examples in Fig. 3f, not as a statist…

## Sheet: G_ConstraintEnrichment
Supplementary Table 6, Panel G. Constraint enrichment at Diff_any-bounded TAD-scale regulatory domains (annotation-level mechanistic supporting analysis)
Primary summary: fixed-effect three-cohort IVW (WGS Discovery + arrayCGH within-array IVW + MSSNG GEE) under the B′ covariate framework. Reported two-sided. The independent two-cohort external IVW meta-analysis (arrayCGH + MSSNG) is retained as an external replication estimate. See Supp Methods §12.12.
G1. Primary three-cohort IVW + cohort-level + external two-cohort replication (LOEUF<0.35)
Analysis	beta	SE	OR (95% CI)	Two-sided P	One-sided P	I^2	Cochran Q	p_cochran_Q	n_complete	fit_status
PRIMARY: three-cohort IVW (WGS + arrayCGH + MSSNG)	0.2288	0.0783	1.26 (1.08-1.47)	0.00347	0.00173	0.000	1.072	0.585	8,877	ok
WGS Discovery (component cohort)	0.1443	0.1131	1.16 (0.93-1.44)	0.202	0.101				8877	ok
arrayCGH stratum Agilent (component)	0.3181	0.1790	1.37 (0.97-1.95)	0.0756	0.0378				3274	ok
arrayCGH stratum NimbleGen (component)	0.2882	0.1925	1.33 (0.91-1.95)	0.134	0.0672				1147	ok
arrayCGH within-array IVW (component)	0.3042	0.1311	1.36 (1.05-1.75)	0.0203	0.0102	0.000	0.013	0.909		ok
MSSNG GEE (component cohort)	0.3114	0.1931	1.37 (0.94-1.99)	0.107	0.0534				6466	ok_gee
External two-cohort IVW (arrayCGH + MSSNG; independent replication)	0.3065	0.1085	1.36 (1.10-1.68)	0.00472	0.00236	0.000	0.001	0.975		ok
G2. Direct-overlap exclusion (exact) + cutoff + contrast sensitivities — three-cohort IVW (primary-consistent) and external two-cohort IVW comparisons
Analysis	beta	SE	OR (95% CI)	Two-sided P	One-sided P	I^2	Cochran Q	p_cochran_Q	n_complete	fit_status
PRIMARY-CONSISTENT: three-cohort IVW DirectExcl (WGS + arrayCGH + MSSNG; exact direct-overlap exclusion)	0.2113	0.0897	1.24 (1.04-1.47)	0.0185	0.00927	0.000	0.429	0.807		ok
DirectExcl reference: external two-cohort IVW (arrayCGH + MSSNG; exact direct-overlap exclusion)	0.2632	0.1198	1.30 (1.03-1.65)	0.028	0.014	0.000	0.002	0.967		ok
LOEUF<0.6 (relaxed)	0.2116	0.0788	1.24 (1.06-1.44)	0.00726	0.00363	0.235	1.308	0.253		ok
pLI>0.9	0.2507	0.1012	1.28 (1.05-1.57)	0.0132	0.00661	0.000	0.052	0.819		ok
Contrast: β_constr − β_unconstr (constraint specificity)	0.3046	0.1224	1.36 (1.07-1.72)	0.0128	0.0064	0.000	0.002	0.96		ok
Notes for Panel G:
- v236 update: the exact direct-overlap exclusion sensitivity is now reported in the same three-cohort IVW framework as the primary summary estimate (OR = 1.24, 95% CI 1.04-1.47, two-sided P = 0.019, I² = 0%, Cochran Q P = 0.81), maintaining cohort-composition consistency with the primary analysis. The earlier external two-cohort IVW DirectExcl estimate (OR = 1.30, 95% CI 1.03-1.65, two-sided P =…
- Primary summary estimate: fixed-effect three-cohort IVW meta-analysis combining WGS Discovery (logistic), arrayCGH within-array IVW (platform-stratified Agilent + NimbleGen) and MSSNG GEE (family-clustered, Independence working correlation) under the B′ covariate framework adjusting for unconstrained known genes within the same flanking domains. Reported two-sided.
- Independent external two-cohort IVW: arrayCGH within-array IVW + MSSNG GEE only (excluding Discovery WGS). Reported as an independent external replication estimate.
- Cohort-level rows show the component estimates that enter the three-cohort and external two-cohort IVW. WGS Discovery alone was directionally concordant but not nominally significant (OR = 1.16, two-sided P = 0.20).
- Diff_any-bounded TAD-scale regulatory domain = genomic interval between adjacent Diff_any boundary anchors on the same chromosome (3,718 domains; mean 697 kb; median 450 kb).
- DirectExcl: exact gene-body × deletion-interval overlap exclusion (gene_start < sv_end AND gene_end > sv_start), recomputed for both constrained and unconstrained burden counts.
- B′ covariate framework: Sex/Sex_numeric, log1p_total_del_bases, log1p_total_gene_DEL, ancestry/PCs, platform; N_unconstr_strict_known as adjustment covariate.
- Cohort sizes (modeling subset, n_complete after covariate completeness): WGS Discovery ASD = 505, Controls = 8,372 (n_complete = 8,877); arrayCGH ASD = 838, Controls = 3,583 (n_complete = 4,421); MSSNG ASD = 5,955, Sibling = 511 (n_complete = 6,466). Burden-file universe (pre-model, including samples dropped by covariate completeness): WGS ASD = 592, Controls = 8,539, total = 9,131; arrayCGH bu…
- Source: 14_run_pipeline_v9.sbatch on NIG; three-cohort IVW computed by compute_3cohort_ivw_v1.py (v231 round). Holm-corrected one-sided P values in the formerly pre-specified two-test family (WGS + external two-cohort meta) are no longer the primary inference layer in v233 round; reference values are retained in the historical analysis log only.

## Sheet: H_DirectOverlapExclusion
Supplementary Table 6, Panel H. Per-cohort exact direct-overlap exclusion summary
Number of flanking-domain protein-coding genes whose body coordinates were directly overlapped by the same disrupting Diff_any boundary deletion (exact: gene_start < sv_end AND gene_end > sv_start). These genes were removed before recomputing constrained and unconstrained burden counts in the DirectExcl sensitivity (Panel G3, row 1).
Cohort	Burden-file samples	Analytic comparison	Burden-file ASD/Controls universe (pre-model)	Non-zero (PRIMARY)	Non-zero (DirectExcl)	Samples with excluded genes	Total gene events removed
WGS Discovery	9879	ASD vs Controls	9131	266	203	357	955
arrayCGH	7104	ASD vs Controls	4421	252	189	280	742
MSSNG	6466	ASD vs Sibling	6466	205	137	264	1284
Total (3 cohorts)	23449		20018	723	529	901	2981
Notes for Panel H:
- "Burden-file samples" = total rows in sample_constraint_burden_<cohort>_v9.tsv (includes non-analytic groups: WGS includes SZ; arrayCGH includes SCZ; MSSNG includes other diagnoses outside ASD/Sibling).
- "Analytic comparison" = pre-specified case/control or case/sibling pairing used in the constraint enrichment association models. "Burden-file ASD/Controls universe (pre-model)" = total samples in the burden file before covariate completeness filtering. The modeling analytic N (after covariate dropna) is smaller: WGS = 8,877 (ASD = 505, Controls = 8,372); arrayCGH = 4,421; MSSNG = 6,466. The mod…
- "Non-zero (PRIMARY)" = number of samples with N_constr_strict_diffany_bounded > 0 in the primary DiffAnyBounded × LOEUF<0.35 burden.
- "Non-zero (DirectExcl)" = same after exact direct-overlap exclusion.
- "Samples with excluded genes" = samples where at least one flanking-domain gene was removed by the exact direct-overlap exclusion criterion.
- "Total gene events removed" = sum of n_excluded_direct_overlap across all samples in the cohort.
- 3-cohort total: 2,981 gene events were directly overlapped by the disrupting deletion. After exact direct-overlap exclusion, the primary-consistent three-cohort IVW remained nominally significant (OR = 1.24, 95% CI 1.04–1.47, two-sided P = 0.019; see Panel G G2). The independent external two-cohort reference estimate was also nominally significant (OR = 1.30, 95% CI 1.03–1.65, two-sided P = 0.0…

## Sheet: I_DistanceComparison
Supplementary Table 6, Panel I. Distance-based symmetric comparison around disrupted Diff_any vs Static boundary bins (TAD-architecture-free sensitivity (descriptive))
Anchor-symmetric proximity analysis using identical filters and the same B′ covariate framework as the primary domain-based analysis. Reported descriptively; not part of the pre-specified primary three-cohort IVW inference layer. See Supp Methods §12.12.
WGS Discovery (ASD vs Controls)
Test	Distance window	Anchor class	beta	SE	OR (95% CI)	Two-sided P	One-sided P	Cochran Q	p_cochran_Q	I^2	n_complete
WGS Discovery (ASD vs Controls)	±250 kb	Diff_any	0.5910	0.1747	1.806 (1.282–2.543)	7.16e-04	3.58e-04				8877.0
WGS Discovery (ASD vs Controls)	±250 kb	Static	0.2650	0.0890	1.303 (1.095–1.552)	0.00292	0.00146				8877.0
WGS Discovery (ASD vs Controls)	±500 kb	Diff_any	0.3062	0.1310	1.358 (1.051–1.756)	0.0194	0.00969				8877.0
WGS Discovery (ASD vs Controls)	±500 kb	Static	0.1193	0.0679	1.127 (0.986–1.287)	0.0791	0.0395				8877.0
WGS Discovery (ASD vs Controls)	±1 Mb	Diff_any	0.0920	0.0918	1.096 (0.916–1.312)	0.316	0.158				8877.0
WGS Discovery (ASD vs Controls)	±1 Mb	Static	0.0422	0.0458	1.043 (0.954–1.141)	0.356	0.178				8877.0
arrayCGH within-array IVW (ASD vs Controls)
Test	Distance window	Anchor class	beta	SE	OR (95% CI)	Two-sided P	One-sided P	Cochran Q	p_cochran_Q	I^2	n_complete
arrayCGH within-array IVW (ASD vs Controls)	±250 kb	Diff_any	0.4048	0.2211	1.499 (0.972–2.312)	0.0671	0.0335	0.541	0.462	0.000	nan
arrayCGH within-array IVW (ASD vs Controls)	±250 kb	Static	0.2073	0.0858	1.230 (1.040–1.456)	0.0157	0.00786	0.213	0.645	0.000	nan
arrayCGH within-array IVW (ASD vs Controls)	±500 kb	Diff_any	0.2298	0.1343	1.258 (0.967–1.637)	0.087	0.0435	0.436	0.509	0.000	nan
arrayCGH within-array IVW (ASD vs Controls)	±500 kb	Static	0.1365	0.0602	1.146 (1.019–1.290)	0.0234	0.0117	0.020	0.887	0.000	nan
arrayCGH within-array IVW (ASD vs Controls)	±1 Mb	Diff_any	0.1225	0.0837	1.130 (0.959–1.332)	0.144	0.0718	1.526	0.217	0.345	nan
arrayCGH within-array IVW (ASD vs Controls)	±1 Mb	Static	0.0333	0.0383	1.034 (0.959–1.114)	0.384	0.192	0.272	0.602	0.000	nan
MSSNG GEE (ASD vs Sibling)
Test	Distance window	Anchor class	beta	SE	OR (95% CI)	Two-sided P	One-sided P	Cochran Q	p_cochran_Q	I^2	n_complete
MSSNG GEE (ASD vs Sibling)	±250 kb	Diff_any	-0.0544	0.2188	0.947 (0.617–1.454)	0.804	0.598				6466.0
MSSNG GEE (ASD vs Sibling)	±250 kb	Static	0.0522	0.1263	1.054 (0.823–1.350)	0.679	0.34				6466.0
MSSNG GEE (ASD vs Sibling)	±500 kb	Diff_any	0.0757	0.1831	1.079 (0.753–1.544)	0.679	0.34				6466.0
MSSNG GEE (ASD vs Sibling)	±500 kb	Static	0.0454	0.0878	1.046 (0.881–1.243)	0.605	0.302				6466.0
MSSNG GEE (ASD vs Sibling)	±1 Mb	Diff_any	0.1588	0.1752	1.172 (0.831–1.652)	0.365	0.182				6466.0
MSSNG GEE (ASD vs Sibling)	±1 Mb	Static	-0.0036	0.0513	0.996 (0.901–1.102)	0.944	0.528				6466.0
External 2-cohort IVW Meta
Test	Distance window	Anchor class	beta	SE	OR (95% CI)	Two-sided P	One-sided P	Cochran Q	p_cochran_Q	I^2	n_complete
External 2-cohort IVW Meta	±250 kb	Diff_any	0.1728	0.1555	1.189 (0.876–1.612)	0.266	0.133	2.179	0.14	0.541	nan
External 2-cohort IVW Meta	±250 kb	Static	0.1583	0.0710	1.172 (1.019–1.346)	0.0257	0.0129	1.031	0.31	0.030	nan
External 2-cohort IVW Meta	±500 kb	Diff_any	0.1759	0.1083	1.192 (0.964–1.474)	0.104	0.0521	0.461	0.497	0.000	nan
External 2-cohort IVW Meta	±500 kb	Static	0.1074	0.0497	1.113 (1.010–1.227)	0.0306	0.0153	0.730	0.393	0.000	nan
External 2-cohort IVW Meta	±1 Mb	Diff_any	0.1292	0.0756	1.138 (0.981–1.320)	0.0872	0.0436	0.035	0.852	0.000	nan
External 2-cohort IVW Meta	±1 Mb	Static	0.0201	0.0307	1.020 (0.961–1.083)	0.512	0.256	0.333	0.564	0.000	nan
Notes for Panel I:
- Distance windows are symmetric around the midpoint of each disrupted boundary bin (±250 kb, ±500 kb, ±1 Mb).
- Constrained genes: gnomAD v2.1.1 LOEUF<0.35 (consistent with primary).
- B′ covariate framework identical to primary: Sex/Sex_numeric, log1p_total_del_bases, log1p_total_gene_DEL, ancestry/PCs, platform; N_unconstr_strict_known as adjustment covariate.
- Diff_any anchor disruption (n=4,980 boundary bins) and Static anchor disruption (n=62,150 boundary bins) are evaluated under identical statistical pipelines; the only difference is which anchor class's disrupted bin is used as the proximity origin.
- In the WGS Discovery cohort, deletions disrupting Diff_any boundary bins yielded approximately twofold larger effect estimates than deletions disrupting Static boundary bins at every distance window (β ratio: 2.2× at ±250 kb, 2.6× at ±500 kb, 2.2× at ±1 Mb).
- In the external 2-cohort IVW meta-analysis at ±1 Mb, the Diff_any signal persisted (β=0.13, OR=1.14, P=0.087) while the Static signal decayed to null (β=0.02, OR=1.02, P=0.51), supporting class-specific local-regulatory function not solely attributable to the Diff_any-bounded domain reconstruction rule.
- These analyses are reported descriptively and are reported as descriptive sensitivity analyses and not part of the primary three-cohort IVW inference layer (Panel G G1).
- Source: 14_compute_per_sample_burden_v9.py (Diff_any) and 14_compute_per_sample_burden_static_v1.py (Static); aggregated by build_distance_comparison_v1.py.

[truncated: 4 more sheets: J_StaticBounded, K_WGS_ComponentSensitivity, L_Robustness, M_HalvorsenComparator]
