# Supplementary material
Source: Research Square preprint supplement (doi:10.21203/rs.3.rs-9869940/v1)
Supplement: Supplementary file 5 [file 9cf20c081f0cb4cb68cdcc78.xlsx]

## Sheet: Cover
Supplementary Table 11
Joint-layer logistic regression integrating WGS-enabled and established genetic risk layers across ASD and SZ.
Description	Six variant-class layers were progressively added to a B'-aligned base model (Sex_numeric + PC1-PC10 + log1p[total_del_bases] + log1p[total_gene_DEL]; sequencing depth additionally included for TRE-layer compatibility) under separate ASD-vs-Controls and SZ-vs-Controls parallel logistic regressions. The progression was M0 (base) -> +Diff_any-DEL (Diff_any_DEL count) -> +TRE (rare_any binary) -> +P…
Panels
Panel A	Progressive nested logistic regression: M0-Mfull across four disorder-caller combinations (28 rows).
Panel B	Added-last conditional-contribution likelihood-ratio test for each layer in Mfull (24 rows; Note column flags sparse-data warnings: possible_separation refers to ancillary covariates with large coefficient magnitude, not Diff_any-DEL/TRE main effects, which remained stable across model specifications).
Panel C	Multinomial logistic regression: formal ASD-vs-SZ Diff_any-DEL coefficient contrast (Wald test on beta_DiffAny,ASD - beta_DiffAny,SZ), 5 model-subset variants.
Panel D	Static_DEL sensitivity: full-layer model with Static_DEL added alongside Diff_any_DEL to test robustness against generic boundary disruption.
Panel E	Layer carrier counts and continuous exposure summaries by disorder x caller.
Panel F	Pearson correlations among the seven layer variables in Controls of joint subset (6 layers + Static_DEL).
Panel G	Per-model glm convergence diagnostics.
Layer definitions	Diff_any-DEL: Diff_any_DEL count (per-individual count of unique 25-kb Diff_any boundary bins disrupted by rare deletions). TRE: rare_any (binary; >=1 rare TRE outlier; cross-fitted EHdn or STRling). PRS: PRS_Z (PRS-CSx, MHC-excluded; z-scored within Controls of joint subset). PTV: binary; rare PTV (gnomAD AF<0.001; LOEUF<0.6) in disorder-specific risk-gene set. CNV: binary; rare exonic CNV delet…

## Sheet: Panel_A_Main
Disorder	Caller	Model	Description	N_total	N_case	N_ctrl	Diff_any-DEL_OR_95CI	Diff_any-DEL_P	TRE_OR_95CI	TRE_P	PRS_OR_95CI	PRS_P	PTV_OR_95CI	PTV_P	CNV_OR_95CI	CNV_P	NAHR_OR_95CI	NAHR_P	Nagelkerke_R2	AUC
ASD	EHdn	M0	Base (Sex+Depth+PCs+log1p[del_bases]+log1p[gene_DEL])	8877	505	8372	-	-	-	-	-	-	-	-	-	-	-	-	0.0821	0.6876
ASD	EHdn	M1	Base + Diff_any-DEL	8877	505	8372	1.439 (1.211-1.710)	3.454e-05	-	-	-	-	-	-	-	-	-	-	0.0885	0.6914
ASD	EHdn	M2	Base + Diff_any-DEL + TRE	8877	505	8372	1.436 (1.207-1.709)	4.444e-05	1.388 (1.081-1.782)	0.01022	-	-	-	-	-	-	-	-	0.0905	0.6949
ASD	EHdn	M3	Base + Diff_any-DEL + TRE + PRS	8877	505	8372	1.435 (1.206-1.708)	4.696e-05	1.387 (1.080-1.782)	0.01031	1.051 (0.960-1.149)	0.2827	-	-	-	-	-	-	0.0908	0.6965
ASD	EHdn	M4	Base + Diff_any-DEL + TRE + PRS + PTV	8877	505	8372	1.427 (1.200-1.697)	5.934e-05	1.384 (1.077-1.778)	0.01105	1.047 (0.957-1.146)	0.3159	2.506 (1.640-3.831)	2.195e-05	-	-	-	-	0.0954	0.7007
ASD	EHdn	M5	Base + Diff_any-DEL + TRE + PRS + PTV + CNV	8877	505	8372	1.387 (1.168-1.648)	0.0001902	1.381 (1.075-1.775)	0.01162	1.046 (0.956-1.145)	0.3243	2.523 (1.651-3.856)	1.894e-05	3.500 (0.923-13.276)	0.06546	-	-	0.0963	0.7002
ASD	EHdn	Mfull	All layers (+ NAHR_CNV)	8877	505	8372	1.392 (1.172-1.653)	0.0001623	1.383 (1.075-1.778)	0.01154	1.044 (0.954-1.143)	0.3488	2.533 (1.657-3.871)	1.76e-05	3.619 (0.956-13.709)	0.05835	2.376 (1.328-4.250)	0.003537	0.0985	0.7041
ASD	STRling	M0	Base (Sex+Depth+PCs+log1p[del_bases]+log1p[gene_DEL])	8877	505	8372	-	-	-	-	-	-	-	-	-	-	-	-	0.0821	0.6876
ASD	STRling	M1	Base + Diff_any-DEL	8877	505	8372	1.439 (1.211-1.710)	3.454e-05	-	-	-	-	-	-	-	-	-	-	0.0885	0.6914
ASD	STRling	M2	Base + Diff_any-DEL + TRE	8877	505	8372	1.446 (1.214-1.722)	3.449e-05	1.408 (1.095-1.810)	0.00758	-	-	-	-	-	-	-	-	0.0906	0.6938
ASD	STRling	M3	Base + Diff_any-DEL + TRE + PRS	8877	505	8372	1.445 (1.213-1.721)	3.658e-05	1.409 (1.096-1.811)	0.007534	1.051 (0.961-1.150)	0.2774	-	-	-	-	-	-	0.091	0.6952
ASD	STRling	M4	Base + Diff_any-DEL + TRE + PRS + PTV	8877	505	8372	1.436 (1.207-1.709)	4.642e-05	1.385 (1.076-1.783)	0.0114	1.048 (0.957-1.147)	0.3109	2.467 (1.611-3.777)	3.249e-05	-	-	-	-	0.0954	0.7004
ASD	STRling	M5	Base + Diff_any-DEL + TRE + PRS + PTV + CNV	8877	505	8372	1.396 (1.175-1.659)	0.0001483	1.384 (1.075-1.781)	0.01167	1.047 (0.957-1.146)	0.3193	2.485 (1.623-3.803)	2.794e-05	3.481 (0.933-12.986)	0.06334	-	-	0.0963	0.7
ASD	STRling	Mfull	All layers (+ NAHR_CNV)	8877	505	8372	1.401 (1.180-1.665)	0.0001229	1.386 (1.076-1.784)	0.01148	1.045 (0.954-1.144)	0.3461	2.492 (1.627-3.815)	2.673e-05	3.599 (0.966-13.412)	0.05637	2.374 (1.329-4.242)	0.003496	0.0985	0.7038
SZ	EHdn	M0	Base (Sex+Depth+PCs+log1p[del_bases]+log1p[gene_DEL])	8999	627	8372	-	-	-	-	-	-	-	-	-	-	-	-	0.0141	0.5781
SZ	EHdn	M1	Base + Diff_any-DEL	8999	627	8372	1.115 (0.934-1.330)	0.2287	-	-	-	-	-	-	-	-	-	-	0.0145	0.5783
SZ	EHdn	M2	Base + Diff_any-DEL + TRE	8999	627	8372	1.121 (0.939-1.338)	0.2065	1.645 (1.330-2.033)	4.222e-06	-	-	-	-	-	-	-	-	0.0199	0.5942
SZ	EHdn	M3	Base + Diff_any-DEL + TRE + PRS	8999	627	8372	1.116 (0.935-1.333)	0.2241	1.609 (1.296-1.998)	1.612e-05	1.875 (1.722-2.040)	6.197e-48	-	-	-	-	-	-	0.0808	0.6928
SZ	EHdn	M4	Base + Diff_any-DEL + TRE + PRS + PTV	8999	627	8372	1.112 (0.930-1.329)	0.244	1.604 (1.291-1.993)	1.987e-05	1.890 (1.736-2.057)	9.142e-49	12.168 (5.209-28.422)	7.781e-09	-	-	-	-	0.0877	0.6981
SZ	EHdn	M5	Base + Diff_any-DEL + TRE + PRS + PTV + CNV	8999	627	8372	1.110 (0.929-1.326)	0.2505	1.605 (1.292-1.995)	1.949e-05	1.891 (1.737-2.058)	7.902e-49	12.222 (5.232-28.552)	7.364e-09	2.352 (0.873-6.334)	0.09066	-	-	0.0884	0.699
SZ	EHdn	Mfull	All layers (+ NAHR_CNV)	8999	627	8372	1.121 (0.938-1.340)	0.2076	1.600 (1.287-1.990)	2.399e-05	1.891 (1.737-2.060)	1.455e-48	12.491 (5.349-29.168)	5.363e-09	2.416 (0.898-6.501)	0.08066	10.801 (5.373-21.712)	2.389e-11	0.0985	0.7044
SZ	STRling	M0	Base (Sex+Depth+PCs+log1p[del_bases]+log1p[gene_DEL])	8999	627	8372	-	-	-	-	-	-	-	-	-	-	-	-	0.0141	0.5781
SZ	STRling	M1	Base + Diff_any-DEL	8999	627	8372	1.115 (0.934-1.330)	0.2287	-	-	-	-	-	-	-	-	-	-	0.0145	0.5783
SZ	STRling	M2	Base + Diff_any-DEL + TRE	8999	627	8372	1.119 (0.939-1.335)	0.2096	1.474 (1.182-1.838)	0.0005772	-	-	-	-	-	-	-	-	0.0176	0.5831
SZ	STRling	M3	Base + Diff_any-DEL + TRE + PRS	8999	627	8372	1.113 (0.933-1.329)	0.2348	1.465 (1.170-1.835)	0.0008942	1.876 (1.724-2.042)	3.202e-48	-	-	-	-	-	-	0.0789	0.6897
SZ	STRling	M4	Base + Diff_any-DEL + TRE + PRS + PTV	8999	627	8372	1.109 (0.929-1.325)	0.2529	1.486 (1.186-1.862)	0.0005862	1.892 (1.738-2.060)	4.154e-49	12.776 (5.507-29.642)	2.974e-09	-	-	-	-	0.0861	0.6957
SZ	STRling	M5	Base + Diff_any-DEL + TRE + PRS + PTV + CNV	8999	627	8372	1.106 (0.926-1.320)	0.2654	1.484 (1.184-1.861)	0.0006076	1.893 (1.739-2.061)	3.378e-49	12.830 (5.529-29.772)	2.817e-09	2.304 (0.858-6.189)	0.09768	-	-	0.0868	0.6964
SZ	STRling	Mfull	All layers (+ NAHR_CNV)	8999	627	8372	1.118 (0.936-1.336)	0.2171	1.442 (1.148-1.812)	0.001654	1.894 (1.740-2.063)	6.108e-49	13.057 (5.628-30.291)	2.179e-09	2.367 (0.882-6.351)	0.08705	10.383 (5.159-20.900)	5.496e-11	0.0966	0.7025

## Sheet: Panel_B_AddedLast_LRT
Disorder	Caller	Layer	DF_diff	LL_ratio_diff	Conditional_LRT_P	Note
ASD	EHdn	Diff_any-DEL	1	16.778	4.202e-05	possible_separation
ASD	EHdn	TRE	1	6.023	0.01412	possible_separation
ASD	EHdn	PRS	1	0.863	0.3529	possible_separation
ASD	EHdn	PTV	1	15.261	9.361e-05	possible_separation
ASD	EHdn	CNV	1	3.037	0.08138	possible_separation
ASD	EHdn	NAHR	1	7.143	0.007524	possible_separation
ASD	STRling	Diff_any-DEL	1	17.425	2.988e-05	possible_separation
ASD	STRling	TRE	1	6.031	0.01406	possible_separation
ASD	STRling	PRS	1	0.873	0.3502	possible_separation
ASD	STRling	PTV	1	14.662	0.0001286	possible_separation
ASD	STRling	CNV	1	3.085	0.07903	possible_separation
ASD	STRling	NAHR	1	7.159	0.007458	possible_separation
SZ	EHdn	Diff_any-DEL	1	1.494	0.2216	possible_separation
SZ	EHdn	TRE	1	16.573	4.682e-05	possible_separation
SZ	EHdn	PRS	1	225.525	5.641e-51	possible_separation
SZ	EHdn	PTV	1	26.055	3.318e-07	possible_separation
SZ	EHdn	CNV	1	2.544	0.1107	possible_separation
SZ	EHdn	NAHR	1	37.626	8.571e-10	possible_separation
SZ	STRling	Diff_any-DEL	1	1.436	0.2307	possible_separation
SZ	STRling	TRE	1	9.312	0.002277	possible_separation
SZ	STRling	PRS	1	227.463	2.131e-51	possible_separation
SZ	STRling	PTV	1	27.045	1.988e-07	possible_separation
SZ	STRling	CNV	1	2.447	0.1177	possible_separation
SZ	STRling	NAHR	1	36.284	1.706e-09	possible_separation

## Sheet: Panel_C_Multinomial
Model_label	Include_TRE	Include_Depth	N_total	N_Controls	N_ASD	N_SZ	Convergence code (0 = converged)	LogLik	OR_DiffAny_ASD (95% CI)	OR_DiffAny_SZ (95% CI)	beta_DiffAny_ASD	beta_DiffAny_SZ	diff_beta	SE_diff	z_diff	P_two_sided	P_one_sided_ASD>SZ
Diff_any-DEL-only (caller-independent, no Depth)	FALSE	FALSE	9504	8372	505	627	0	-4133.31	1.429 (1.218-1.678)	1.124 (0.938-1.347)	0.357	0.117	0.24	0.109	2.194	0.02825	0.01412
Diff_any-DEL-only (EHdn complete-case subset, +Depth)	FALSE	TRUE	9504	8372	505	627	0	-4086.79	1.426 (1.212-1.677)	1.125 (0.938-1.349)	0.355	0.118	0.237	0.11	2.153	0.03132	0.01566
Diff_any-DEL+TRE (EHdn complete-case subset, +Depth)	TRUE	TRUE	9504	8372	505	627	0	-4075.09	1.426 (1.212-1.679)	1.125 (0.939-1.349)	0.355	0.118	0.237	0.11	2.163	0.03056	0.01528
Diff_any-DEL-only (STRling complete-case subset, +Depth)	FALSE	TRUE	9504	8372	505	627	0	-4086.79	1.426 (1.212-1.677)	1.125 (0.938-1.349)	0.355	0.118	0.237	0.11	2.153	0.03132	0.01566
Diff_any-DEL+TRE (STRling complete-case subset, +Depth)	TRUE	TRUE	9504	8372	505	627	0	-4079.16	1.429 (1.214-1.682)	1.130 (0.943-1.354)	0.357	0.122	0.235	0.109	2.15	0.03156	0.01578

## Sheet: Panel_D_Static_Sensitivity
Disorder	Caller	Diff_any_OR (95% CI)	Diff_any_P	Static_OR (95% CI)	Static_P	TRE_OR (95% CI)	TRE_P	Nagelkerke_R2	AUC	Note
ASD	EHdn	1.306 (1.075-1.587)	0.007172	1.010 (0.996-1.024)	0.1495	1.388 (1.080-1.785)	0.01057	0.0991	0.7053
ASD	STRling	1.316 (1.083-1.600)	0.005852	1.010 (0.996-1.023)	0.1566	1.388 (1.078-1.788)	0.01099	0.0991	0.7048
SZ	EHdn	1.097 (0.899-1.337)	0.3631	1.004 (0.989-1.019)	0.6022	1.602 (1.288-1.993)	2.289e-05	0.0986	0.7045
SZ	STRling	1.096 (0.898-1.337)	0.3667	1.004 (0.988-1.019)	0.6454	1.443 (1.149-1.814)	0.001627	0.0966	0.7026

## Sheet: Panel_E_Carrier_Counts
Disorder	Caller	Layer	Metric_type	N_case	N_ctrl	Case_count	Ctrl_count	Case_rate	Ctrl_rate	Case_mean	Ctrl_mean	Case_median	Ctrl_median	Case_Q1	Case_Q3	Ctrl_Q1	Ctrl_Q3
ASD	EHdn	Diff_any_DEL	continuous_mean	505	8372					0.2535	0.0726	0	0	0	0	0	0
ASD	EHdn	Static_DEL	continuous_mean	505	8372					3.5307	1.6697	0	0	0	2	0	2
ASD	EHdn	PRS_Z	continuous_mean	505	8372					0.0518	0.0006	-0.1327	-0.1823	-0.4624	0.2516	-0.5183	0.3424
ASD	EHdn	rare_any	binary_count	505	8372	84	1030	0.1663	0.123
ASD	EHdn	PTV	binary_count	505	8372	29	203	0.0574	0.0242
ASD	EHdn	CNV	binary_count	505	8372	4	12	0.0079	0.0014
ASD	EHdn	NAHR	binary_count	505	8372	15	103	0.0297	0.0123
ASD	STRling	Diff_any_DEL	continuous_mean	505	8372					0.2535	0.0726	0	0	0	0	0	0
ASD	STRling	Static_DEL	continuous_mean	505	8372					3.5307	1.6697	0	0	0	2	0	2
ASD	STRling	PRS_Z	continuous_mean	505	8372					0.0511	0	-0.1331	-0.1826	-0.4623	0.2507	-0.5182	0.3413
ASD	STRling	rare_any	binary_count	505	8372	84	1003	0.1663	0.1198
ASD	STRling	PTV	binary_count	505	8372	29	203	0.0574	0.0242
ASD	STRling	CNV	binary_count	505	8372	4	12	0.0079	0.0014
ASD	STRling	NAHR	binary_count	505	8372	15	103	0.0297	0.0123
SZ	EHdn	Diff_any_DEL	continuous_mean	627	8372					0.1085	0.0726	0	0	0	0	0	0
SZ	EHdn	Static_DEL	continuous_mean	627	8372					2.0622	1.6697	0	0	0	2	0	2
SZ	EHdn	PRS_Z	continuous_mean	627	8372					0.619	0.0019	0.6481	0.002	-0.0752	1.2928	-0.6716	0.6781
SZ	EHdn	rare_any	binary_count	627	8372	118	1030	0.1882	0.123
SZ	EHdn	PTV	binary_count	627	8372	10	16	0.0159	0.0019
SZ	EHdn	CNV	binary_count	627	8372	5	32	0.008	0.0038
SZ	EHdn	NAHR	binary_count	627	8372	17	20	0.0271	0.0024
SZ	STRling	Diff_any_DEL	continuous_mean	627	8372					0.1085	0.0726	0	0	0	0	0	0
SZ	STRling	Static_DEL	continuous_mean	627	8372					2.0622	1.6697	0	0	0	2	0	2
SZ	STRling	PRS_Z	continuous_mean	627	8372					0.6177	0	0.6469	0.0001	-0.0772	1.2923	-0.6743	0.677
SZ	STRling	rare_any	binary_count	627	8372	106	1003	0.1691	0.1198
SZ	STRling	PTV	binary_count	627	8372	10	16	0.0159	0.0019
SZ	STRling	CNV	binary_count	627	8372	5	32	0.008	0.0038
SZ	STRling	NAHR	binary_count	627	8372	17	20	0.0271	0.0024

## Sheet: Panel_F_Controls_Correlations
Disorder	Caller	Layer1	Layer2	Pearson_r
ASD	EHdn	Diff_any_DEL	Static_DEL	0.4293
ASD	EHdn	Diff_any_DEL	rare_any	-0.0037
ASD	EHdn	Diff_any_DEL	PRS_Z	0.0092
ASD	EHdn	Diff_any_DEL	PTV	0.0026
ASD	EHdn	Diff_any_DEL	CNV	0.1267
ASD	EHdn	Diff_any_DEL	NAHR	0.013
ASD	EHdn	Static_DEL	rare_any	-0.0143
ASD	EHdn	Static_DEL	PRS_Z	0.0057
ASD	EHdn	Static_DEL	PTV	-0.001
ASD	EHdn	Static_DEL	CNV	0.1452
ASD	EHdn	Static_DEL	NAHR	0.0168
ASD	EHdn	rare_any	PRS_Z	-0.0026
ASD	EHdn	rare_any	PTV	-0.007
ASD	EHdn	rare_any	CNV	-0.0142
ASD	EHdn	rare_any	NAHR	-0.0121
ASD	EHdn	PRS_Z	PTV	0.0126
ASD	EHdn	PRS_Z	CNV	-0.0083
ASD	EHdn	PRS_Z	NAHR	0.0008
ASD	EHdn	PTV	CNV	-0.006
ASD	EHdn	PTV	NAHR	-0.0035
ASD	EHdn	CNV	NAHR	-0.0042
ASD	STRling	Diff_any_DEL	Static_DEL	0.4293
ASD	STRling	Diff_any_DEL	rare_any	-0.0116
ASD	STRling	Diff_any_DEL	PRS_Z	0.0092
ASD	STRling	Diff_any_DEL	PTV	0.0026
ASD	STRling	Diff_any_DEL	CNV	0.1267
ASD	STRling	Diff_any_DEL	NAHR	0.013
ASD	STRling	Static_DEL	rare_any	-0.0093
ASD	STRling	Static_DEL	PRS_Z	0.0057
ASD	STRling	Static_DEL	PTV	-0.001
ASD	STRling	Static_DEL	CNV	0.1452
ASD	STRling	Static_DEL	NAHR	0.0168
ASD	STRling	rare_any	PRS_Z	-0.0048
ASD	STRling	rare_any	PTV	0.004
ASD	STRling	rare_any	CNV	0.0055
ASD	STRling	rare_any	NAHR	-0.0045
ASD	STRling	PRS_Z	PTV	0.0126
ASD	STRling	PRS_Z	CNV	-0.0083
ASD	STRling	PRS_Z	NAHR	0.0008
ASD	STRling	PTV	CNV	-0.006
ASD	STRling	PTV	NAHR	-0.0035
ASD	STRling	CNV	NAHR	-0.0042
SZ	EHdn	Diff_any_DEL	Static_DEL	0.4293
SZ	EHdn	Diff_any_DEL	rare_any	-0.0037
SZ	EHdn	Diff_any_DEL	PRS_Z	-0.0081
SZ	EHdn	Diff_any_DEL	PTV	0.0061
SZ	EHdn	Diff_any_DEL	CNV	-0.0017
SZ	EHdn	Diff_any_DEL	NAHR	-0.0094
SZ	EHdn	Static_DEL	rare_any	-0.0143
SZ	EHdn	Static_DEL	PRS_Z	-0.01
SZ	EHdn	Static_DEL	PTV	0.0007
SZ	EHdn	Static_DEL	CNV	0.0056
SZ	EHdn	Static_DEL	NAHR	0.0126
SZ	EHdn	rare_any	PRS_Z	0.0159
SZ	EHdn	rare_any	PTV	-0.0081
SZ	EHdn	rare_any	CNV	-0.0114
SZ	EHdn	rare_any	NAHR	-0.0109
SZ	EHdn	PRS_Z	PTV	-0.0216
SZ	EHdn	PRS_Z	CNV	-0.0094
SZ	EHdn	PRS_Z	NAHR	0.0003
SZ	EHdn	PTV	CNV	-0.0027
SZ	EHdn	PTV	NAHR	-0.0021
SZ	EHdn	CNV	NAHR	-0.003
SZ	STRling	Diff_any_DEL	Static_DEL	0.4293
SZ	STRling	Diff_any_DEL	rare_any	-0.0116
SZ	STRling	Diff_any_DEL	PRS_Z	-0.0081
SZ	STRling	Diff_any_DEL	PTV	0.0061
SZ	STRling	Diff_any_DEL	CNV	-0.0017
SZ	STRling	Diff_any_DEL	NAHR	-0.0094
SZ	STRling	Static_DEL	rare_any	-0.0093
SZ	STRling	Static_DEL	PRS_Z	-0.01
SZ	STRling	Static_DEL	PTV	0.0007
SZ	STRling	Static_DEL	CNV	0.0056
SZ	STRling	Static_DEL	NAHR	0.0126
SZ	STRling	rare_any	PRS_Z	-0.0045
SZ	STRling	rare_any	PTV	-0.0077
SZ	STRling	rare_any	CNV	0.001
SZ	STRling	rare_any	NAHR	0.0347
SZ	STRling	PRS_Z	PTV	-0.0216
SZ	STRling	PRS_Z	CNV	-0.0094
SZ	STRling	PRS_Z	NAHR	0.0003
SZ	STRling	PTV	CNV	-0.0027
SZ	STRling	PTV	NAHR	-0.0021
SZ	STRling	CNV	NAHR	-0.003

## Sheet: Panel_G_Diagnostics
Disorder	Caller	Model	Converged	N_iter	Max_abs_beta	Aliased_coef_count	Deviance	Null_deviance	DF_residual
ASD	EHdn	M0	TRUE	6	15.2379	0	3614.53	3876.04	8862
ASD	EHdn	M1	TRUE	6	15.3364	0	3593.51	3876.04	8861
ASD	EHdn	M2	TRUE	6	15.3964	0	3587.3	3876.04	8860
ASD	EHdn	M3	TRUE	6	15.4369	0	3586.16	3876.04	8859
ASD	EHdn	M4	TRUE	6	15.9988	0	3571.22	3876.04	8858
ASD	EHdn	M5	TRUE	6	16.2398	0	3568.33	3876.04	8857
ASD	EHdn	Mfull	TRUE	6	16.2254	0	3561.19	3876.04	8856
ASD	EHdn	Mfull_static	TRUE	6	16.1543	0	3559.09	3876.04	8855
ASD	STRling	M0	TRUE	6	15.2379	0	3614.53	3876.04	8862
ASD	STRling	M1	TRUE	6	15.3364	0	3593.51	3876.04	8861
ASD	STRling	M2	TRUE	6	15.3768	0	3586.81	3876.04	8860
ASD	STRling	M3	TRUE	6	15.4209	0	3585.65	3876.04	8859
ASD	STRling	M4	TRUE	6	15.9752	0	3571.28	3876.04	8858
ASD	STRling	M5	TRUE	6	16.2114	0	3568.34	3876.04	8857
ASD	STRling	Mfull	TRUE	6	16.1757	0	3561.18	3876.04	8856
ASD	STRling	Mfull_static	TRUE	6	16.0978	0	3559.16	3876.04	8855
SZ	EHdn	M0	TRUE	6	20.5052	0	4499.31	4549.82	8984
SZ	EHdn	M1	TRUE	6	20.5357	0	4497.97	4549.82	8983
SZ	EHdn	M2	TRUE	6	20.4225	0	4478.53	4549.82	8982
SZ	EHdn	M3	TRUE	6	25.6111	0	4256.61	4549.82	8981
SZ	EHdn	M4	TRUE	6	25.8766	0	4231	4549.82	8980
SZ	EHdn	M5	TRUE	6	26.1055	0	4228.6	4549.82	8979
SZ	EHdn	Mfull	TRUE	6	24.9894	0	4190.97	4549.82	8978
SZ	EHdn	Mfull_static	TRUE	6	24.9809	0	4190.72	4549.82	8977
SZ	STRling	M0	TRUE	6	20.5052	0	4499.31	4549.82	8984
SZ	STRling	M1	TRUE	6	20.5357	0	4497.97	4549.82	8983
SZ	STRling	M2	TRUE	6	20.5212	0	4486.92	4549.82	8982
SZ	STRling	M3	TRUE	6	25.545	0	4263.5	4549.82	8981
SZ	STRling	M4	TRUE	6	25.8066	0	4236.82	4549.82	8980
SZ	STRling	M5	TRUE	6	26.0463	0	4234.52	4549.82	8979
SZ	STRling	Mfull	TRUE	6	24.9703	0	4198.23	4549.82	8978
SZ	STRling	Mfull_static	TRUE	6	24.9589	0	4198.04	4549.82	8977
