# Supplementary material
Source: Research Square preprint supplement (doi:10.21203/rs.3.rs-9869940/v1)
Supplement: Supplementary file 6 [file cebc8f70b317a444370e48fe.xlsx]

## Sheet: Panel A - SZ Significant Genes
Gene	Gene ID	Best variant class	CMH P	De novo P	Meta P	Bonferroni significant	FDR (q-value)	JPN case carriers	JPN control carriers	JPN de novo PTV	Total de novo count	Significance level
SETD1A	ENSG00000099381	PTV+MPC>2	3.83e-12	2.6e-05	3.76e-15	Yes	6.79e-11	1	0	0	3	Bonferroni
XPO7	ENSG00000130227	PTV+MPC>3	2.47e-09	0.0318	1.9e-09	Yes	1.46e-05	0	1	0	1	Bonferroni
ZMYM2	ENSG00000121741	PTV	6.35e-05	1.59e-06	2.43e-09	Yes	1.46e-05	0	0	2	3	Bonferroni
SRRM2	ENSG00000167978	PTV	6.87e-09	—	6.87e-09	Yes	3.1e-05	2	2	0	0	Bonferroni
TRIO	ENSG00000038382	PTV	2.36e-07	0.00165	8.81e-09	Yes	3.18e-05	1	1	0	2	Bonferroni
HERC1	ENSG00000103657	PTV	1.42e-08	0.065	1.42e-08	Yes	4.26e-05	0	0	1	1	Bonferroni
CUL1	ENSG00000055130	PTV	0.00012	1.97e-05	4.94e-08	Yes	0.000118	0	1	0	3	Bonferroni
STAG1	ENSG00000118007	PTV+MPC>2	5.22e-08	—	5.22e-08	Yes	0.000118	0	1	0	0	Bonferroni
AKAP11	ENSG00000023516	PTV	2.42e-07	—	2.42e-07	Yes	0.000484	1	3	0	0	Bonferroni
PCLO	ENSG00000186472	PTV	5.33e-07	—	5.33e-07	Yes	0.000962	1	0	0	0	Bonferroni
GRIA3	ENSG00000125675	PTV+MPC>3	5.84e-05	0.000696	7.32e-07	Yes	0.0012	0	0	0	2	Bonferroni
ZNF136	ENSG00000196646	PTV	8.12e-07	—	8.12e-07	Yes	0.00122	0	2	0	0	Bonferroni
SLC6A1	ENSG00000157103	MPC>2	0.000974	5.18e-05	8.98e-07	Yes	0.00125	0	0	0	3	Bonferroni
SP4	ENSG00000105866	PTV	1.04e-05	0.0109	1.92e-06	Yes	0.00248	0	0	0	1	Bonferroni
GRIN2A	ENSG00000183454	PTV+MPC>3	2.42e-06	—	2.42e-06	Yes	0.00291	0	0	0	0	Bonferroni
RB1CC1	ENSG00000023287	PTV	0.00049	0.000648	5.07e-06	No	0.00572	0	0	0	2	FDR < 0.05
FAM120A	ENSG00000048828	PTV+MPC>3	6.54e-06	—	6.54e-06	No	0.00694	0	0	0	0	FDR < 0.05
MAGEC1	ENSG00000155495	PTV	7.84e-06	—	7.84e-06	No	0.00786	0	0	0	0	FDR < 0.05
ZMYND11	ENSG00000015171	PTV	7.85e-05	0.0138	1.6e-05	No	0.0145	0	0	0	1	FDR < 0.05
RANBP9	ENSG00000010017	PTV	1.61e-05	—	1.61e-05	No	0.0145	1	0	0	0	FDR < 0.05
AMPH	ENSG00000078053	PTV	0.00235	0.000492	1.7e-05	No	0.0146	0	0	1	2	FDR < 0.05
BSCL2	ENSG00000168000	PTV	1.99e-05	—	1.99e-05	No	0.0163	1	12	0	0	FDR < 0.05
HIST1H1E	ENSG00000168298	PTV	0.00248	0.000897	3.12e-05	No	0.0244	0	0	0	1	FDR < 0.05
KLC1	ENSG00000126214	MPC>2	4.97e-05	—	4.97e-05	No	0.0373	1	1	0	0	FDR < 0.05
ANKRD12	ENSG00000101745	PTV	5.47e-05	—	5.47e-05	No	0.0373	0	1	0	0	FDR < 0.05
CGREF1	ENSG00000138028	PTV	5.53e-05	—	5.53e-05	No	0.0373	0	1	0	0	FDR < 0.05
OR4P4	ENSG00000181927	PTV	5.58e-05	—	5.58e-05	No	0.0373	0	0	0	0	FDR < 0.05
MAGI2	ENSG00000187391	PTV	0.000117	0.0373	5.82e-05	No	0.0375	0	0	0	1	FDR < 0.05
SREK1	ENSG00000153914	PTV	7.84e-05	—	7.84e-05	No	0.0488	3	3	0	0	FDR < 0.05
SLC22A11	ENSG00000168065	PTV	8.29e-05	—	8.29e-05	No	0.0499	0	1	0	0	FDR < 0.05

## Sheet: Panel B - Full Gene Results
Gene ID	Gene symbol	Best variant class	CMH P-value	De novo P-value	Meta P-value	Bonferroni P	Bonferroni significant	q-value (FDR)	FDR significant
ENSG00000099381	SETD1A	PTV+MPC>2	3.8254e-12	2.6e-05	3.76425e-15	6.79184e-11	Yes	6.79184e-11	Yes
ENSG00000130227	XPO7	PTV+MPC>3	2.46814e-09	0.0317695	1.90297e-09	3.43354e-05	Yes	1.46319e-05	Yes
ENSG00000121741	ZMYM2	PTV	6.35412e-05	1.59447e-06	2.43284e-09	4.38957e-05	Yes	1.46319e-05	Yes
ENSG00000167978	SRRM2	PTV	6.87227e-09	1	6.87227e-09	0.000123996	Yes	3.09991e-05	Yes
ENSG00000038382	TRIO	PTV	2.35976e-07	0.00164639	8.807e-09	0.000158905	Yes	3.17809e-05	Yes
ENSG00000103657	HERC1	PTV	1.41644e-08	0.0650421	1.41644e-08	0.000255568	Yes	4.25947e-05	Yes
ENSG00000055130	CUL1	PTV	0.000120258	1.97e-05	4.94207e-08	0.000891698	Yes	0.000117827	Yes
ENSG00000118007	STAG1	PTV+MPC>2	5.22427e-08	1	5.22427e-08	0.000942614	Yes	0.000117827	Yes
ENSG00000023516	AKAP11	PTV	2.41656e-07	1	2.41656e-07	0.0043602	Yes	0.000484467	Yes
ENSG00000186472	PCLO	PTV	5.33019e-07	1	5.33019e-07	0.00961727	Yes	0.000961727	Yes
ENSG00000125675	GRIA3	PTV+MPC>3	5.83565e-05	0.000696398	7.32261e-07	0.0132122	Yes	0.00120111	Yes
ENSG00000196646	ZNF136	PTV	8.11779e-07	1	8.11779e-07	0.0146469	Yes	0.00122058	Yes
ENSG00000157103	SLC6A1	MPC>2	0.000974305	5.18e-05	8.98445e-07	0.0162106	Yes	0.00124697	Yes
ENSG00000105866	SP4	PTV	1.03868e-05	0.0108837	1.92128e-06	0.0346656	Yes	0.00247611	Yes
ENSG00000183454	GRIN2A	PTV+MPC>3	2.41822e-06	1	2.41822e-06	0.043632	Yes	0.0029088	Yes
ENSG00000023287	RB1CC1	PTV	0.000489855	0.000648479	5.07059e-06	0.0914887	No	0.00571805	Yes
ENSG00000048828	FAM120A	PTV+MPC>3	6.54311e-06	1	6.54311e-06	0.118057	No	0.00694455	Yes
ENSG00000155495	MAGEC1	PTV	7.84199e-06	1	7.84199e-06	0.141493	No	0.00786073	Yes
ENSG00000015171	ZMYND11	PTV	7.85109e-05	0.0138013	1.59664e-05	0.288082	No	0.0145146	Yes
ENSG00000010017	RANBP9	PTV	1.60889e-05	1	1.60889e-05	0.290291	No	0.0145146	Yes
ENSG00000078053	AMPH	PTV	0.0023521	0.000492487	1.69917e-05	0.306581	No	0.0145991	Yes
ENSG00000168000	BSCL2	PTV	1.99119e-05	1	1.99119e-05	0.359271	No	0.0163305	Yes
ENSG00000168298	HIST1H1E	PTV	0.00247916	0.000896695	3.11597e-05	0.562214	No	0.0244441	Yes
ENSG00000126214	KLC1	MPC>2	4.96859e-05	1	4.96859e-05	0.896482	No	0.0372788	Yes
ENSG00000101745	ANKRD12	PTV	5.47177e-05	1	5.47177e-05	0.987272	No	0.0372788	Yes
ENSG00000138028	CGREF1	PTV	5.52667e-05	1	5.52667e-05	0.997177	No	0.0372788	Yes
ENSG00000181927	OR4P4	PTV	5.5785e-05	1	5.5785e-05	1	No	0.0372788	Yes
ENSG00000187391	MAGI2	PTV	0.000116782	0.037339	5.81821e-05	1	No	0.0374921	Yes
ENSG00000153914	SREK1	PTV	7.83823e-05	1	7.83823e-05	1	No	0.0487673	Yes
ENSG00000168065	SLC22A11	PTV	8.29389e-05	1	8.29389e-05	1	No	0.0498822	Yes
ENSG00000160218	TRAPPC10	PTV	9.14671e-05	1	9.14671e-05	1	No	0.0532368	No
ENSG00000143603	KCNN3	PTV	9.8575e-05	1	9.8575e-05	1	No	0.0546841	No
ENSG00000138622	HCN4	PTV	0.000102811	1	0.000102811	1	No	0.0546841	No
ENSG00000163444	TMEM183A	PTV	0.000363008	0.0232983	0.000107245	1	No	0.0546841	No
ENSG00000172660	TAF15	PTV	0.000110353	1	0.000110353	1	No	0.0546841	No
ENSG00000197136	PCNXL3	PTV	0.000110454	1	0.000110454	1	No	0.0546841	No
ENSG00000151623	NR3C2	PTV+MPC>2	0.000112138	1	0.000112138	1	No	0.0546841	No
ENSG00000130741	EIF2S3	PTV+MPC>2	0.000122444	1	0.000122444	1	No	0.0581385	No
ENSG00000126461	SCAF1	PTV	0.000849776	0.0154373	0.000160587	1	No	0.0742942	No
ENSG00000166025	AMOTL1	PTV	0.000178952	1	0.000178952	1	No	0.0799338	No
ENSG00000211455	STK38L	PTV+MPC>2	0.000182252	1	0.000182252	1	No	0.0799338	No
ENSG00000095321	CRAT	PTV	0.000186068	1	0.000186068	1	No	0.0799338	No
ENSG00000010810	FYN	PTV+MPC>3	0.000191439	1	0.000191439	1	No	0.0803287	No
ENSG00000163993	S100P	PTV	0.000207826	1	0.000207826	1	No	0.0852228	No
ENSG00000132510	KDM6B	PTV+MPC>2	0.000215507	0.129767	0.000215507	1	No	0.0864089	No
ENSG00000117280	RAB7L1	PTV	0.000222559	1	0.000222559	1	No	0.0872965	No
ENSG00000090316	MAEA	PTV+MPC>2	0.000585332	0.0409452	0.000278943	1	No	0.107085	No
ENSG00000148840	PPRC1	PTV+MPC>2	0.000300394	1	0.000300394	1	No	0.112917	No
ENSG00000103148	NPRL3	PTV	0.00455024	0.00585871	0.000307437	1	No	0.113206	No
ENSG00000179915	NRXN1	PTV	0.000340413	1	0.000340413	1	No	0.12244	No
ENSG00000114353	GNAI2	MPC>2	0.000346085	1	0.000346085	1	No	0.12244	No
ENSG00000198626	RYR2	PTV+MPC>2	0.000395777	0.319175	0.000395777	1	No	0.135147	No
ENSG00000187266	EPOR	PTV+MPC>2	0.000396985	1	0.000396985	1	No	0.135147	No
ENSG00000077713	SLC25A43	PTV	0.00040513	1	0.00040513	1	No	0.135366	No
ENSG00000006831	ADIPOR2	PTV+MPC>2	0.000473131	1	0.000473131	1	No	0.153046	No
ENSG00000159164	SV2A	PTV+MPC>2	0.000722048	0.0600381	0.000478856	1	No	0.153046	No
ENSG00000173674	EIF1AX	PTV+MPC>2	0.000483489	1	0.000483489	1	No	0.153046	No
ENSG00000168959	GRM5	PTV+MPC>2	0.000493006	1	0.000493006	1	No	0.153367	No
ENSG00000139636	LMBR1L	PTV	0.000589855	1	0.000589855	1	No	0.177926	No
ENSG00000119906	FAM178A	PTV	0.000591674	1	0.000591674	1	No	0.177926	No
ENSG00000009307	CSDE1	PTV+MPC>2	0.000636498	1	0.000636498	1	No	0.186323	No
ENSG00000173933	RBM4	PTV+MPC>2	0.000640251	1	0.000640251	1	No	0.186323	No
ENSG00000146021	KLHL3	PTV+MPC>2	0.000673843	1	0.000673843	1	No	0.192986	No
ENSG00000100226	GTPBP1	PTV+MPC>2	0.000734001	1	0.000734001	1	No	0.205236	No
ENSG00000155330	C16orf87	PTV+MPC>2	0.000739363	1	0.000739363	1	No	0.205236	No
ENSG00000006283	CACNA1G	PTV+MPC>3	0.000787329	1	0.000787329	1	No	0.215239	No
ENSG00000164104	HMGB2	PTV+MPC>2	0.000881867	1	0.000881867	1	No	0.237416	No
ENSG00000170035	UBE2E3	PTV+MPC>2	0.000900795	1	0.000900795	1	No	0.237416	No
ENSG00000085377	PREP	PTV	0.00320742	0.0273751	0.000907925	1	No	0.237416	No
ENSG00000173575	CHD2	PTV+MPC>2	0.0009901	1	0.0009901	1	No	0.250204	No
ENSG00000157087	ATP2B2	PTV+MPC>2	0.000994856	1	0.000994856	1	No	0.250204	No
ENSG00000112320	SOBP	PTV	0.00684926	0.0142423	0.00099843	1	No	0.250204	No
ENSG00000010818	HIVEP2	PTV+MPC>2	0.00206009	0.0502976	0.00105429	1	No	0.257248	No
ENSG00000134780	DAGLA	PTV	0.00105506	1	0.00105506	1	No	0.257248	No
ENSG00000113161	HMGCR	PTV	0.00109527	1	0.00109527	1	No	0.263493	No
ENSG00000169992	NLGN2	MPC>2	0.0011392	0.161563	0.0011392	1	No	0.269297	No
ENSG00000197360	ZNF98	PTV+MPC>2	0.00114925	1	0.00114925	1	No	0.269297	No
ENSG00000133858	ZFC3H1	PTV	0.00117186	1	0.00117186	1	No	0.271075	No
ENSG00000116254	CHD5	PTV+MPC>2	0.00120097	0.20195	0.00120097	1	No	0.272756	No
ENSG00000184611	KCNH7	PTV+MPC>2	0.00120936	1	0.00120936	1	No	0.272756	No
ENSG00000185627	PSMD13	PTV	0.00128494	1	0.00128494	1	No	0.286225	No
ENSG00000169398	PTK2	PTV	0.00130258	1	0.00130258	1	No	0.286616	No
ENSG00000160445	ZER1	PTV	0.00134761	1	0.00134761	1	No	0.292951	No
ENSG00000167601	AXL	PTV	0.00144912	1	0.00144912	1	No	0.311269	No
ENSG00000102038	SMARCA1	PTV	0.00146882	1	0.00146882	1	No	0.311788	No
ENSG00000126070	AGO3	MPC>2	0.00152508	1	0.00152508	1	No	0.319283	No
ENSG00000186260	MKL2	MPC>2	0.00156408	1	0.00156408	1	No	0.319283	No
ENSG00000023191	RNH1	PTV	0.00157201	1	0.00157201	1	No	0.319283	No
ENSG00000107551	RASSF4	PTV	0.00157491	1	0.00157491	1	No	0.319283	No
ENSG00000198216	CACNA1E	PTV+MPC>2	0.00160259	1	0.00160259	1	No	0.321285	No
ENSG00000154229	PRKCA	MPC>2	0.00162107	1	0.00162107	1	No	0.321418	No
ENSG00000159259	CHAF1B	PTV	0.00168401	1	0.00168401	1	No	0.327259	No
ENSG00000169750	RAC3	PTV	0.00169032	1	0.00169032	1	No	0.327259	No
ENSG00000099821	POLRMT	PTV	0.00170495	1	0.00170495	1	No	0.327259	No
ENSG00000116539	ASH1L	PTV	0.0017774	1	0.0017774	1	No	0.328629	No
ENSG00000065000	AP3D1	PTV	0.00180507	1	0.00180507	1	No	0.328629	No
ENSG00000164434	FABP7	PTV	0.00181278	1	0.00181278	1	No	0.328629	No
ENSG00000111199	TRPV4	PTV+MPC>2	0.00181317	1	0.00181317	1	No	0.328629	No
ENSG00000147526	TACC1	PTV	0.00181792	1	0.00181792	1	No	0.328629	No
ENSG00000177462	OR2T8	PTV	0.00182137	1	0.00182137	1	No	0.328629	No
ENSG00000146729	GBAS	PTV	0.00184859	1	0.00184859	1	No	0.33024	No
ENSG00000107331	ABCA2	PTV+MPC>2	0.00186707	0.218213	0.00186707	1	No	0.33027	No
ENSG00000136002	ARHGEF4	PTV+MPC>2	0.00192771	1	0.00192771	1	No	0.331883	No
ENSG00000111052	LIN7A	PTV	0.0019292	1	0.0019292	1	No	0.331883	No
ENSG00000141905	NFIC	PTV	0.00193137	1	0.00193137	1	No	0.331883	No
ENSG00000137504	CREBZF	MPC>2	0.00197309	1	0.00197309	1	No	0.334041	No
ENSG00000072071	LPHN1	PTV	0.00199812	1	0.00199812	1	No	0.334041	No
ENSG00000162441	LZIC	PTV	0.00201738	1	0.00201738	1	No	0.334041	No
ENSG00000109674	NEIL3	PTV	0.0020307	1	0.0020307	1	No	0.334041	No
ENSG00000080802	CNOT4	PTV	0.00203649	1	0.00203649	1	No	0.334041	No
ENSG00000160882	CYP11B1	PTV	0.00206991	1	0.00206991	1	No	0.336463	No
ENSG00000186665	C17orf58	PTV	0.00220211	1	0.00220211	1	No	0.354756	No
ENSG00000197535	MYO5A	PTV	0.00226556	1	0.00226556	1	No	0.361748	No
ENSG00000159650	UROC1	PTV	0.0023125	1	0.0023125	1	No	0.366004	No
ENSG00000105639	JAK3	PTV+MPC>2	0.00234886	1	0.00234886	1	No	0.367298	No
ENSG00000178591	DEFB125	PTV	0.00236139	1	0.00236139	1	No	0.367298	No
ENSG00000084731	KIF3C	PTV	0.00239729	1	0.00239729	1	No	0.369696	No
ENSG00000162909	CAPN2	PTV+MPC>2	0.0042665	0.0622127	0.00245103	1	No	0.372092	No
ENSG00000125823	CSTL1	PTV	0.00245408	1	0.00245408	1	No	0.372092	No
ENSG00000205085	FAM71F2	PTV	0.00249295	1	0.00249295	1	No	0.374836	No
ENSG00000171467	ZNF318	PTV	0.00799755	0.0343849	0.00252961	1	No	0.377205	No
ENSG00000117877	CD3EAP	PTV	0.00259046	1	0.00259046	1	No	0.381589	No
ENSG00000185379	RAD51D	PTV	0.00260131	1	0.00260131	1	No	0.381589	No
ENSG00000092978	GPATCH2	PTV	0.00263067	1	0.00263067	1	No	0.382783	No
ENSG00000153234	NR4A2	PTV	0.00266968	1	0.00266968	1	No	0.384606	No
ENSG00000214050	FBXO16	PTV	0.00268583	1	0.00268583	1	No	0.384606	No
ENSG00000162378	ZYG11B	PTV	0.00271403	1	0.00271403	1	No	0.385585	No
ENSG00000078142	PIK3C3	MPC>2	0.00276661	1	0.00276661	1	No	0.38906	No
ENSG00000138814	PPP3CA	PTV	0.00278162	1	0.00278162	1	No	0.38906	No
ENSG00000076382	SPAG5	PTV	0.0028824	1	0.0028824	1	No	0.400055	No
ENSG00000149346	SLX4IP	PTV	0.0029581	1	0.0029581	1	No	0.407427	No
ENSG00000198909	MAP3K3	PTV+MPC>2	0.00299516	1	0.00299516	1	No	0.409407	No
ENSG00000108018	SORCS1	PTV	0.00315742	1	0.00315742	1	No	0.428341	No
ENSG00000126368	NR1D1	PTV+MPC>2	0.00318685	1	0.00318685	1	No	0.429108	No
ENSG00000124201	ZNFX1	PTV	0.00323509	1	0.00323509	1	No	0.431702	No
ENSG00000141639	MAPK4	PTV+MPC>2	0.0032709	1	0.0032709	1	No	0.431702	No
ENSG00000018625	ATP1A2	PTV+MPC>3	0.0032779	1	0.0032779	1	No	0.431702	No
ENSG00000186732	MPPED1	PTV	0.00332808	1	0.00332808	1	No	0.435135	No
ENSG00000108468	CBX1	MPC>2	0.00335978	1	0.00335978	1	No	0.436119	No
ENSG00000179046	TRIML2	PTV	0.00345673	1	0.00345673	1	No	0.445087	No
ENSG00000054793	ATP9A	PTV	0.00347821	1	0.00347821	1	No	0.445087	No
ENSG00000164794	KCNV1	PTV+MPC>3	0.00354748	1	0.00354748	1	No	0.448064	No
ENSG00000150768	DLAT	PTV	0.00355142	1	0.00355142	1	No	0.448064	No
ENSG00000163995	ABLIM2	PTV	0.00359414	1	0.00359414	1	No	0.448064	No
ENSG00000138336	TET1	MPC>2	0.0036008	1	0.0036008	1	No	0.448064	No
ENSG00000153956	CACNA2D1	PTV	0.00366786	1	0.00366786	1	No	0.451686	No
ENSG00000158417	EIF5B	MPC>2	0.00367998	1	0.00367998	1	No	0.451686	No
ENSG00000055917	PUM2	PTV	0.0038769	1	0.0038769	1	No	0.466543	No
ENSG00000184271	POU6F1	PTV+MPC>2	0.00391582	1	0.00391582	1	No	0.466543	No
ENSG00000184451	CCR10	MPC>2	0.00393791	1	0.00393791	1	No	0.466543	No
ENSG00000171587	DSCAM	PTV	0.00394028	1	0.00394028	1	No	0.466543	No
ENSG00000172538	FAM170B	PTV	0.00394674	1	0.00394674	1	No	0.466543	No
ENSG00000178974	FBXO34	PTV	0.00398215	1	0.00398215	1	No	0.466543	No
ENSG00000100567	PSMA3	PTV	0.00398667	1	0.00398667	1	No	0.466543	No
ENSG00000100105	PATZ1	PTV	0.00400788	1	0.00400788	1	No	0.466543	No
ENSG00000176102	CSTF3	PTV+MPC>3	0.00406627	1	0.00406627	1	No	0.467667	No
ENSG00000116698	SMG7	PTV+MPC>2	0.00406938	1	0.00406938	1	No	0.467667	No
ENSG00000149485	FADS1	PTV+MPC>2	0.00427843	1	0.00427843	1	No	0.48858	No
ENSG00000204480	PRAMEF19	PTV+MPC>2	0.00444711	1	0.00444711	1	No	0.503151	No
ENSG00000122557	HERPUD2	PTV	0.0044618	1	0.0044618	1	No	0.503151	No
ENSG00000102974	CTCF	PTV+MPC>3	0.004538	1	0.004538	1	No	0.504235	No
ENSG00000053371	AKR7A2	PTV	0.00455349	1	0.00455349	1	No	0.504235	No
ENSG00000096063	SRPK1	PTV	0.0045582	1	0.0045582	1	No	0.504235	No
ENSG00000130382	MLLT1	PTV+MPC>2	0.00458319	1	0.00458319	1	No	0.504235	No
ENSG00000087245	MMP2	PTV	0.00463573	1	0.00463573	1	No	0.505489	No
ENSG00000072518	MARK2	MPC>2	0.00469693	1	0.00469693	1	No	0.505489	No
ENSG00000099822	HCN2	PTV+MPC>2	0.0047703	1	0.0047703	1	No	0.505489	No
ENSG00000197153	HIST1H3J	PTV+MPC>2	0.0047864	1	0.0047864	1	No	0.505489	No
ENSG00000157765	SLC34A2	PTV	0.00479594	1	0.00479594	1	No	0.505489	No
ENSG00000135018	UBQLN1	PTV+MPC>2	0.00483163	1	0.00483163	1	No	0.505489	No
ENSG00000196455	PIK3R4	PTV	0.00484284	1	0.00484284	1	No	0.505489	No
ENSG00000183496	MEX3B	PTV+MPC>2	0.00488098	1	0.00488098	1	No	0.505489	No
ENSG00000105755	ETHE1	PTV+MPC>2	0.00488627	1	0.00488627	1	No	0.505489	No
ENSG00000038219	BOD1L1	PTV	0.00491308	1	0.00491308	1	No	0.505489	No
ENSG00000163960	UBXN7	PTV+MPC>3	0.00491884	1	0.00491884	1	No	0.505489	No
ENSG00000132702	HAPLN2	PTV	0.00493078	1	0.00493078	1	No	0.505489	No
ENSG00000108509	CAMTA2	PTV	0.00499894	1	0.00499894	1	No	0.509581	No
ENSG00000101158	NELFCD	PTV	0.00505453	1	0.00505453	1	No	0.512354	No
ENSG00000165916	PSMC3	MPC>2	0.00521586	1	0.00521586	1	No	0.525753	No
ENSG00000215271	HOMEZ	PTV	0.00534134	1	0.00534134	1	No	0.532489	No
ENSG00000142784	WDTC1	PTV	0.00534171	1	0.00534171	1	No	0.532489	No
ENSG00000105388	CEACAM5	PTV	0.00537918	1	0.00537918	1	No	0.533278	No
ENSG00000183617	MRPL54	PTV	0.00545473	1	0.00545473	1	No	0.537608	No
ENSG00000132334	PTPRE	PTV	0.00550068	1	0.00550068	1	No	0.537608	No
ENSG00000112249	ASCC3	PTV	0.00551225	1	0.00551225	1	No	0.537608	No
ENSG00000144410	CPO	PTV	0.00572983	1	0.00572983	1	No	0.542401	No
ENSG00000092820	EZR	PTV	0.00573574	1	0.00573574	1	No	0.542401	No
ENSG00000186191	BPIFB4	PTV	0.005741	1	0.005741	1	No	0.542401	No
ENSG00000248383	PCDHAC1	PTV	0.00574163	1	0.00574163	1	No	0.542401	No
ENSG00000115694	STK25	PTV	0.00574457	1	0.00574457	1	No	0.542401	No
ENSG00000153820	SPHKAP	PTV	0.00576908	1	0.00576908	1	No	0.542401	No
ENSG00000113712	CSNK1A1	PTV+MPC>3	0.00577182	1	0.00577182	1	No	0.542401	No
ENSG00000109063	MYH3	PTV+MPC>2	0.00592617	1	0.00592617	1	No	0.554021	No
ENSG00000197959	DNM3	PTV+MPC>3	0.00596523	1	0.00596523	1	No	0.554797	No
ENSG00000198720	ANKRD13B	MPC>2	0.00607855	1	0.00607855	1	No	0.562438	No
ENSG00000102786	INTS6	PTV	0.00628732	1	0.00628732	1	No	0.573635	No
ENSG00000240184	PCDHGC3	PTV	0.00632982	1	0.00632982	1	No	0.573635	No
ENSG00000187240	DYNC2H1	PTV	0.00633386	1	0.00633386	1	No	0.573635	No
ENSG00000172171	TEFM	PTV	0.00634223	1	0.00634223	1	No	0.573635	No
ENSG00000182108	DEXI	PTV	0.00640019	1	0.00640019	1	No	0.573635	No
ENSG00000175003	SLC22A1	PTV	0.00642893	1	0.00642893	1	No	0.573635	No
ENSG00000070882	OSBPL3	PTV	0.00645599	1	0.00645599	1	No	0.573635	No
ENSG00000177169	ULK1	PTV	0.00645883	1	0.00645883	1	No	0.573635	No
ENSG00000197409	HIST1H3D	PTV+MPC>2	0.00651955	1	0.00651955	1	No	0.573635	No
ENSG00000107485	GATA3	PTV	0.00661648	1	0.00661648	1	No	0.573635	No
ENSG00000185651	UBE2L3	PTV+MPC>3	0.00661648	1	0.00661648	1	No	0.573635	No
ENSG00000105492	SIGLEC6	PTV	0.00663143	1	0.00663143	1	No	0.573635	No
ENSG00000114841	DNAH1	PTV	0.00663708	1	0.00663708	1	No	0.573635	No
ENSG00000116106	EPHA4	PTV+MPC>2	0.00664625	1	0.00664625	1	No	0.573635	No
ENSG00000242259	C22orf39	PTV	0.0066779	1	0.0066779	1	No	0.573635	No
ENSG00000198933	TBKBP1	PTV	0.00673089	1	0.00673089	1	No	0.573635	No
ENSG00000177694	NAALADL2	PTV	0.00674945	1	0.00674945	1	No	0.573635	No
ENSG00000130340	SNX9	MPC>2	0.00679653	1	0.00679653	1	No	0.573635	No
ENSG00000105568	PPP2R1A	PTV+MPC>2	0.00680363	1	0.00680363	1	No	0.573635	No
ENSG00000146242	TPBG	MPC>2	0.00685867	1	0.00685867	1	No	0.575586	No
ENSG00000133958	UNC79	PTV+MPC>2	0.00696565	0.207752	0.00696565	1	No	0.578893	No
ENSG00000165209	STRBP	PTV	0.00696837	1	0.00696837	1	No	0.578893	No
ENSG00000104689	TNFRSF10A	PTV	0.00699432	1	0.00699432	1	No	0.578893	No
ENSG00000089486	CDIP1	PTV	0.00725475	1	0.00725475	1	No	0.593412	No
ENSG00000111783	RFX4	PTV	0.00733747	1	0.00733747	1	No	0.593412	No
ENSG00000158486	DNAH3	PTV	0.00735436	1	0.00735436	1	No	0.593412	No
ENSG00000174307	PHLDA3	MPC>2	0.0073772	1	0.0073772	1	No	0.593412	No
ENSG00000102053	ZC3H12B	PTV	0.00738433	1	0.00738433	1	No	0.593412	No
ENSG00000182866	LCK	MPC>2	0.00739149	1	0.00739149	1	No	0.593412	No
ENSG00000075415	SLC25A3	PTV	0.00739997	1	0.00739997	1	No	0.593412	No
ENSG00000198793	MTOR	MPC>2	0.00746314	1	0.00746314	1	No	0.595829	No
ENSG00000153563	CD8A	MPC>2	0.0075055	1	0.0075055	1	No	0.596571	No
ENSG00000163872	YEATS2	PTV	0.00761011	1	0.00761011	1	No	0.602234	No
ENSG00000105835	NAMPT	PTV+MPC>3	0.00770993	1	0.00770993	1	No	0.60533	No
ENSG00000129292	PHF20L1	PTV+MPC>2	0.00777727	1	0.00777727	1	No	0.60533	No
ENSG00000183775	KCTD16	PTV	0.00779648	1	0.00779648	1	No	0.60533	No
ENSG00000104853	CLPTM1	PTV	0.00780883	1	0.00780883	1	No	0.60533	No
ENSG00000170004	CHD3	PTV+MPC>2	0.00788365	1	0.00788365	1	No	0.60533	No
ENSG00000162407	PPAP2B	PTV	0.00793006	1	0.00793006	1	No	0.60533	No
ENSG00000139990	DCAF5	PTV+MPC>2	0.00793053	1	0.00793053	1	No	0.60533	No
ENSG00000139549	DHH	MPC>2	0.007947	1	0.007947	1	No	0.60533	No
ENSG00000112941	PAPD7	PTV+MPC>2	0.00795119	1	0.00795119	1	No	0.60533	No
ENSG00000164164	OTUD4	PTV	0.00813274	1	0.00813274	1	No	0.61655	No
ENSG00000139826	ABHD13	PTV	0.00820042	1	0.00820042	1	No	0.61908	No
ENSG00000179979	CRIPAK	PTV	0.00828475	1	0.00828475	1	No	0.622052	No
ENSG00000137441	FGFBP2	PTV	0.00830874	1	0.00830874	1	No	0.622052	No
ENSG00000183196	CHST6	PTV	0.00836969	1	0.00836969	1	No	0.624026	No
ENSG00000170370	EMX2	PTV	0.0084512	1	0.0084512	1	No	0.627511	No
ENSG00000160961	ZNF333	PTV	0.00861181	1	0.00861181	1	No	0.636173	No
ENSG00000271605	MILR1	PTV	0.00863838	1	0.00863838	1	No	0.636173	No
ENSG00000001631	KRIT1	PTV	0.00874173	1	0.00874173	1	No	0.641166	No
ENSG00000006530	AGK	PTV	0.00888176	1	0.00888176	1	No	0.644933	No
ENSG00000107187	LHX3	PTV+MPC>2	0.00892512	1	0.00892512	1	No	0.644933	No
ENSG00000004399	PLXND1	MPC>2	0.00893171	1	0.00893171	1	No	0.644933	No
ENSG00000125484	GTF3C4	PTV	0.00896773	1	0.00896773	1	No	0.644933	No
ENSG00000166960	CCDC178	PTV	0.00899497	1	0.00899497	1	No	0.644933	No
ENSG00000203724	C1orf53	PTV	0.00903015	1	0.00903015	1	No	0.644933	No
ENSG00000165861	ZFYVE1	MPC>2	0.00909128	1	0.00909128	1	No	0.644933	No
ENSG00000116882	HAO2	PTV	0.00912301	1	0.00912301	1	No	0.644933	No
ENSG00000138286	FAM149B1	PTV	0.00914938	1	0.00914938	1	No	0.644933	No
ENSG00000160951	PTGER1	PTV	0.00915052	1	0.00915052	1	No	0.644933	No
ENSG00000115310	RTN4	PTV	0.00936009	1	0.00936009	1	No	0.657136	No
ENSG00000101384	JAG1	PTV+MPC>2	0.00947345	1	0.00947345	1	No	0.662517	No
ENSG00000165983	PTER	PTV	0.00953759	1	0.00953759	1	No	0.664428	No
ENSG00000171462	DLK2	PTV	0.0096124	1	0.0096124	1	No	0.667064	No
ENSG00000101126	ADNP	PTV	0.00989491	1	0.00989491	1	No	0.683283	No
ENSG00000171502	COL24A1	PTV	0.00992187	1	0.00992187	1	No	0.683283	No
ENSG00000007062	PROM1	PTV	0.0100747		0.0100747	1	No	0.687932	No
ENSG00000102984	ZNF821	MPC>2	0.0100991		0.0100991	1	No	0.687932	No
ENSG00000087128	TMPRSS11E	PTV	0.0101364		0.0101364	1	No	0.687932	No
ENSG00000118307	CASC1	PTV	0.0101419		0.0101419	1	No	0.687932	No
ENSG00000072858	SIDT1	PTV	0.0102317		0.0102317	1	No	0.688067	No
ENSG00000147601	TERF1	PTV	0.0102696		0.0102696	1	No	0.688067	No
ENSG00000163291	PAQR3	PTV	0.010337		0.010337	1	No	0.688067	No
ENSG00000163684	RPP14	PTV	0.0104277		0.0104277	1	No	0.688067	No
ENSG00000160714	UBE2Q1	PTV+MPC>2	0.010435		0.010435	1	No	0.688067	No
ENSG00000127125	PPCS	PTV	0.0104403		0.0104403	1	No	0.688067	No
ENSG00000112144	ICK	PTV	0.0104505		0.0104505	1	No	0.688067	No
ENSG00000164061	BSN	PTV	0.0104647		0.0104647	1	No	0.688067	No
ENSG00000141540	TTYH2	PTV	0.0104871		0.0104871	1	No	0.688067	No
ENSG00000006756	ARSD	PTV	0.0105291	1	0.0105291	1	No	0.688323	No
ENSG00000104892	KLC3	PTV	0.0106182		0.0106182	1	No	0.691243	No
ENSG00000182568	SATB1	PTV	0.0106504		0.0106504	1	No	0.691243	No
ENSG00000213901	SLC23A3	PTV	0.0107828		0.0107828	1	No	0.697326	No
ENSG00000203859	HSD3B2	PTV	0.0109198		0.0109198	1	No	0.69947	No
ENSG00000180901	KCTD2	PTV+MPC>2	0.010972		0.010972	1	No	0.69947	No
ENSG00000152291	TGOLN2	PTV	0.0110173		0.0110173	1	No	0.69947	No
ENSG00000040199	PHLPP2	PTV	0.0110428		0.0110428	1	No	0.69947	No
ENSG00000080224	EPHA6	PTV	0.0110582		0.0110582	1	No	0.69947	No
ENSG00000158863	FAM160B2	PTV	0.0110658		0.0110658	1	No	0.69947	No
ENSG00000100890	KIAA0391	PTV	0.0110873		0.0110873	1	No	0.69947	No
ENSG00000212864	RNF208	PTV	0.0111431		0.0111431	1	No	0.699853	No
ENSG00000130640	TUBGCP2	PTV	0.0112205		0.0112205	1	No	0.699853	No
ENSG00000007237	GAS7	PTV	0.0113406		0.0113406	1	No	0.699853	No
ENSG00000132005	RFX1	PTV	0.0113466		0.0113466	1	No	0.699853	No
ENSG00000196092	PAX5	PTV+MPC>2	0.0113566		0.0113566	1	No	0.699853	No
ENSG00000222040	ADRA2B	PTV	0.0114304		0.0114304	1	No	0.699853	No
ENSG00000166167	BTRC	PTV+MPC>2	0.0114429		0.0114429	1	No	0.699853	No
ENSG00000196950	SLC39A10	MPC>2	0.0114579		0.0114579	1	No	0.699853	No
ENSG00000085274	MYNN	PTV	0.011555		0.011555	1	No	0.699853	No
ENSG00000154252	GAL3ST2	PTV	0.0115743		0.0115743	1	No	0.699853	No
ENSG00000258083	OR9A4	PTV	0.0115753		0.0115753	1	No	0.699853	No
ENSG00000112511	PHF1	MPC>2	0.0115986		0.0115986	1	No	0.699853	No
ENSG00000103429	BFAR	PTV	0.0116078		0.0116078	1	No	0.699853	No
ENSG00000241685	ARPC1A	MPC>2	0.0116618		0.0116618	1	No	0.699853	No
ENSG00000154553	PDLIM3	PTV	0.0116752		0.0116752	1	No	0.699853	No
ENSG00000113100	CDH9	PTV	0.011772		0.011772	1	No	0.70332	No
ENSG00000087085	ACHE	PTV+MPC>2	0.0118655		0.0118655	1	No	0.706565	No
ENSG00000082269	FAM135A	PTV	0.0119532		0.0119532	1	No	0.709448	No
ENSG00000119969	HELLS	PTV+MPC>2	0.0122022		0.0122022	1	No	0.721849	No
ENSG00000108175	ZMIZ1	PTV	0.0124417		0.0124417	1	No	0.730717	No
ENSG00000176884	GRIN1	MPC>2	0.0124579		0.0124579	1	No	0.730717	No
ENSG00000108753	HNF1B	PTV+MPC>3	0.0124797		0.0124797	1	No	0.730717	No
ENSG00000114646	CSPG5	PTV	0.0125229		0.0125229	1	No	0.730717	No
ENSG00000165322	ARHGAP12	PTV	0.0125711		0.0125711	1	No	0.730717	No
ENSG00000064651	SLC12A2	PTV	0.0125951		0.0125951	1	No	0.730717	No
ENSG00000172845	SP3	MPC>2	0.0126609		0.0126609	1	No	0.731274	No
ENSG00000198900	TOP1	MPC>2	0.0126857		0.0126857	1	No	0.731274	No
ENSG00000157764	BRAF	PTV+MPC>2	0.012811		0.012811	1	No	0.736083	No
ENSG00000106571	GLI3	PTV+MPC>2	0.0128507		0.0128507	1	No	0.736083	No
ENSG00000139133	ALG10	PTV	0.0129525		0.0129525	1	No	0.739562	No
ENSG00000198218	QRICH1	PTV	0.0131248		0.0131248	1	No	0.744761	No
ENSG00000157869	RAB28	PTV	0.0131335		0.0131335	1	No	0.744761	No
ENSG00000110697	PITPNM1	PTV+MPC>2	0.0132185		0.0132185	1	No	0.744761	No
ENSG00000114423	CBLB	PTV	0.0133113		0.0133113	1	No	0.744761	No
ENSG00000151164	RAD9B	PTV	0.0133495		0.0133495	1	No	0.744761	No
ENSG00000115665	SLC5A7	PTV+MPC>2	0.0134021		0.0134021	1	No	0.744761	No
ENSG00000166800	LDHAL6A	PTV	0.0134146		0.0134146	1	No	0.744761	No
ENSG00000173230	GOLGB1	PTV	0.0134459		0.0134459	1	No	0.744761	No
ENSG00000166788	SAAL1	PTV	0.0134482		0.0134482	1	No	0.744761	No
ENSG00000162244	RPL29	PTV+MPC>2	0.0134563		0.0134563	1	No	0.744761	No
ENSG00000181652	ATG9B	PTV	0.0137715		0.0137715	1	No	0.758272	No
ENSG00000126453	BCL2L12	PTV	0.0138395		0.0138395	1	No	0.758272	No
ENSG00000123643	SLC36A1	PTV	0.0138618		0.0138618	1	No	0.758272	No
ENSG00000146938	NLGN4X	PTV+MPC>2	0.0138685	1	0.0138685	1	No	0.758272	No
ENSG00000174718	KIAA1551	PTV	0.0139965		0.0139965	1	No	0.762956	No
ENSG00000090266	NDUFB2	PTV	0.0140619		0.0140619	1	No	0.764215	No
ENSG00000110076	NRXN2	PTV	0.0141937		0.0141937	1	No	0.768397	No
ENSG00000058056	USP13	PTV	0.0142366		0.0142366	1	No	0.768397	No
ENSG00000143799	PARP1	PTV	0.0143369		0.0143369	1	No	0.768397	No
ENSG00000168398	BDKRB2	PTV	0.014337		0.014337	1	No	0.768397	No
ENSG00000008083	JARID2	PTV	0.0143518		0.0143518	1	No	0.768397	No
ENSG00000128513	POT1	PTV+MPC>2	0.0144738		0.0144738	1	No	0.772634	No
ENSG00000106683	LIMK1	PTV	0.0145541		0.0145541	1	No	0.774313	No
ENSG00000164576	SAP30L	PTV	0.014591		0.014591	1	No	0.774313	No
ENSG00000116649	SRM	MPC>2	0.0147088		0.0147088	1	No	0.775201	No
ENSG00000171044	XKR6	PTV	0.0147254		0.0147254	1	No	0.775201	No
ENSG00000162419	GMEB1	PTV+MPC>3	0.0147605		0.0147605	1	No	0.775201	No
ENSG00000176994	SMCR8	PTV	0.0148226		0.0148226	1	No	0.775201	No
ENSG00000189050	RNFT1	PTV	0.0148226		0.0148226	1	No	0.775201	No
ENSG00000070831	CDC42	PTV	0.0149656		0.0149656	1	No	0.778169	No
ENSG00000082482	KCNK2	MPC>2	0.0149656		0.0149656	1	No	0.778169	No
ENSG00000161513	FDXR	PTV	0.0150318		0.0150318	1	No	0.779367	No
ENSG00000112232	KHDRBS2	PTV	0.015089		0.015089	1	No	0.780087	No
ENSG00000058404	CAMK2B	PTV+MPC>2	0.0152766		0.0152766	1	No	0.787533	No
ENSG00000162337	LRP5	PTV	0.0154188		0.0154188	1	No	0.792598	No
ENSG00000112212	TSPO2	PTV	0.0154852		0.0154852	1	No	0.792774	No
ENSG00000198759	EGFL6	PTV	0.0155101	1	0.0155101	1	No	0.792774	No
ENSG00000198133	TMEM229B	MPC>2	0.0155569		0.0155569	1	No	0.792917	No
ENSG00000154654	NCAM2	PTV	0.0156043		0.0156043	1	No	0.793096	No
ENSG00000156804	FBXO32	PTV+MPC>2	0.0157092		0.0157092	1	No	0.796184	No
ENSG00000134001	EIF2S1	PTV	0.0158691		0.0158691	1	No	0.799235	No
ENSG00000128923	FAM63B	PTV	0.0158853		0.0158853	1	No	0.799235	No
ENSG00000196850	PPTC7	PTV+MPC>2	0.0159023		0.0159023	1	No	0.799235	No
ENSG00000144567	FAM134A	PTV	0.0159791		0.0159791	1	No	0.799996	No
ENSG00000123384	LRP1	PTV	0.0160061		0.0160061	1	No	0.799996	No
ENSG00000186471	AKAP14	PTV	0.0162871	1	0.0162871	1	No	0.81179	No
ENSG00000141076	CIRH1A	PTV	0.0163963		0.0163963	1	No	0.813651	No
ENSG00000130182	ZSCAN10	PTV	0.0164608		0.0164608	1	No	0.813651	No
ENSG00000178171	AMER3	PTV	0.0165146		0.0165146	1	No	0.813651	No
ENSG00000172534	HCFC1	MPC>2	0.0165456	1	0.0165456	1	No	0.813651	No
ENSG00000134389	CFHR5	PTV	0.0165693		0.0165693	1	No	0.813651	No
ENSG00000180543	TSPYL5	PTV	0.016595		0.016595	1	No	0.813651	No
ENSG00000172915	NBEA	PTV+MPC>2	0.0167986		0.0167986	1	No	0.821404	No
ENSG00000106302	HYAL4	PTV	0.0168654		0.0168654	1	No	0.82244	No
ENSG00000186881	OR13F1	PTV	0.0169867		0.0169867	1	No	0.823141	No
ENSG00000187758	ADH1A	PTV	0.0169873		0.0169873	1	No	0.823141	No
ENSG00000180974	OR52E4	PTV	0.0170167		0.0170167	1	No	0.823141	No
ENSG00000149930	TAOK2	PTV+MPC>2	0.0171618		0.0171618	1	No	0.826208	No
ENSG00000198513	ATL1	PTV	0.0171822		0.0171822	1	No	0.826208	No
ENSG00000120210	INSL6	PTV	0.0172174		0.0172174	1	No	0.826208	No
ENSG00000273439	ZNF8	PTV	0.017308		0.017308	1	No	0.827135	No
ENSG00000171988	JMJD1C	PTV+MPC>3	0.0173652		0.0173652	1	No	0.827135	No
ENSG00000205436	EXOC3L4	MPC>2	0.0173962		0.0173962	1	No	0.827135	No
ENSG00000269113	TRABD2B	MPC>2	0.0174562		0.0174562	1	No	0.827135	No
ENSG00000072201	LNX1	PTV	0.017466		0.017466	1	No	0.827135	No
ENSG00000122687	FTSJ2	PTV	0.0176423		0.0176423	1	No	0.831224	No
ENSG00000127585	FBXL16	PTV+MPC>2	0.0176444		0.0176444	1	No	0.831224	No
ENSG00000102606	ARHGEF7	PTV	0.0177001		0.0177001	1	No	0.831676	No
ENSG00000075290	WNT8B	PTV+MPC>2	0.0178029		0.0178029	1	No	0.83371	No
ENSG00000186106	ANKRD46	MPC>2	0.0178359		0.0178359	1	No	0.83371	No
ENSG00000254726	MEX3A	MPC>2	0.0180178		0.0180178	1	No	0.840037	No
ENSG00000101438	SLC32A1	PTV	0.0182142		0.0182142	1	No	0.845495	No
ENSG00000182771	GRID1	MPC>2	0.0182379		0.0182379	1	No	0.845495	No
ENSG00000092201	SUPT16H	PTV+MPC>2	0.0182754		0.0182754	1	No	0.845495	No
ENSG00000166847	DCTN5	PTV	0.0184161		0.0184161	1	No	0.847057	No
ENSG00000198912	C1orf174	PTV	0.0184643		0.0184643	1	No	0.847057	No
ENSG00000116750	UCHL5	PTV	0.0184964		0.0184964	1	No	0.847057	No
ENSG00000007545	CRAMP1L	PTV	0.0185021		0.0185021	1	No	0.847057	No
ENSG00000182326	C1S	PTV	0.0185439		0.0185439	1	No	0.847057	No
ENSG00000206560	ANKRD28	PTV	0.0186268		0.0186268	1	No	0.847244	No
ENSG00000163328	GPR155	MPC>2	0.018708		0.018708	1	No	0.847244	No
ENSG00000189042	ZNF567	PTV	0.0187445		0.0187445	1	No	0.847244	No
ENSG00000163873	GRIK3	PTV	0.0187486		0.0187486	1	No	0.847244	No
ENSG00000162739	SLAMF6	PTV	0.0187828		0.0187828	1	No	0.847244	No
ENSG00000116688	MFN2	PTV	0.0188307		0.0188307	1	No	0.84729	No
ENSG00000196230	TUBB	MPC>2	0.0189615		0.0189615	1	No	0.85105	No
ENSG00000111642	CHD4	PTV	0.019131		0.019131	1	No	0.855704	No
ENSG00000138698	RAP1GDS1	PTV	0.019202		0.019202	1	No	0.855704	No
ENSG00000140471	LINS	PTV	0.0192074		0.0192074	1	No	0.855704	No
ENSG00000128594	LRRC4	PTV	0.0193666		0.0193666	1	No	0.857903	No
ENSG00000124571	XPO5	MPC>2	0.0193762		0.0193762	1	No	0.857903	No
ENSG00000113296	THBS4	PTV	0.0194236		0.0194236	1	No	0.857903	No
ENSG00000135801	TAF5L	PTV	0.019447		0.019447	1	No	0.857903	No
ENSG00000132604	TERF2	PTV+MPC>2	0.0195029		0.0195029	1	No	0.858272	No
ENSG00000159217	IGF2BP1	PTV+MPC>2	0.0196346		0.0196346	1	No	0.859124	No
ENSG00000108671	PSMD11	PTV	0.0196502		0.0196502	1	No	0.859124	No
ENSG00000109920	FNBP4	PTV+MPC>2	0.0196852		0.0196852	1	No	0.859124	No
ENSG00000181396	OGFOD3	PTV	0.0197128		0.0197128	1	No	0.859124	No
ENSG00000216588	IGSF23	PTV	0.0197844		0.0197844	1	No	0.859942	No
ENSG00000111674	ENO2	PTV+MPC>2	0.0198896		0.0198896	1	No	0.859942	No
ENSG00000107954	NEURL1	PTV+MPC>2	0.0199569		0.0199569	1	No	0.859942	No
ENSG00000127452	FBXL12	PTV	0.0199659		0.0199659	1	No	0.859942	No
ENSG00000131910	NR0B2	PTV	0.0199698		0.0199698	1	No	0.859942	No
ENSG00000126890	CTAG2	PTV	0.0200546	1	0.0200546	1	No	0.861536	No
ENSG00000204542	C6orf15	PTV	0.0201401		0.0201401	1	No	0.863154	No
ENSG00000165675	ENOX2	PTV	0.0202833	1	0.0202833	1	No	0.86587	No
ENSG00000123810	B9D2	PTV	0.0203525		0.0203525	1	No	0.86587	No
ENSG00000127511	SIN3B	MPC>2	0.0204012		0.0204012	1	No	0.86587	No
ENSG00000111962	UST	PTV	0.0204768		0.0204768	1	No	0.86587	No
ENSG00000147669	POLR2K	PTV	0.0205294		0.0205294	1	No	0.86587	No
ENSG00000033627	ATP6V0A1	PTV+MPC>2	0.0205697		0.0205697	1	No	0.86587	No
ENSG00000175600	SUGCT	PTV	0.0206757		0.0206757	1	No	0.86587	No
ENSG00000120693	SMAD9	PTV	0.0207217		0.0207217	1	No	0.86587	No
ENSG00000167522	ANKRD11	PTV	0.0207598		0.0207598	1	No	0.86587	No
ENSG00000169900	PYDC1	MPC>2	0.0207674		0.0207674	1	No	0.86587	No
ENSG00000163576	EFHB	PTV	0.0207848		0.0207848	1	No	0.86587	No
ENSG00000180190	TDRP	PTV	0.0208176		0.0208176	1	No	0.86587	No
ENSG00000159173	TNNI1	PTV+MPC>2	0.0208273		0.0208273	1	No	0.86587	No
ENSG00000160352	ZNF714	PTV	0.0209834		0.0209834	1	No	0.870352	No
ENSG00000165271	NOL6	PTV	0.0211001		0.0211001	1	No	0.873186	No
ENSG00000119915	ELOVL3	PTV	0.0212686		0.0212686	1	No	0.877186	No
ENSG00000013306	SLC25A39	PTV	0.021294		0.021294	1	No	0.877186	No
ENSG00000112038	OPRM1	PTV	0.0214887		0.0214887	1	No	0.883189	No
ENSG00000158901	WFDC8	PTV	0.0217387		0.0217387	1	No	0.891434	No
ENSG00000163071	SPATA18	PTV	0.021957		0.021957	1	No	0.896772	No
ENSG00000183036	PCP4	PTV	0.0219682		0.0219682	1	No	0.896772	No
ENSG00000182827	ACBD3	PTV	0.0221363		0.0221363	1	No	0.899722	No
ENSG00000177051	FBXO46	PTV	0.0221402		0.0221402	1	No	0.899722	No
ENSG00000213859	KCTD11	PTV+MPC>2	0.0222539		0.0222539	1	No	0.900602	No
ENSG00000196263	ZNF471	PTV	0.0222617		0.0222617	1	No	0.900602	No
ENSG00000091181	IL5RA	PTV	0.0223353		0.0223353	1	No	0.901558	No
ENSG00000121753	BAI2	MPC>2	0.0224321		0.0224321	1	No	0.901976	No
ENSG00000196604	POTEF	PTV	0.0224457		0.0224457	1	No	0.901976	No
ENSG00000111726	CMAS	PTV+MPC>2	0.0226815		0.0226815	1	No	0.909427	No
ENSG00000142733	MAP3K6	PTV	0.0227736		0.0227736	1	No	0.910375	No
ENSG00000080031	PTPRH	PTV	0.0229214		0.0229214	1	No	0.910375	No
ENSG00000141376	BCAS3	PTV	0.0229938		0.0229938	1	No	0.910375	No
ENSG00000107242	PIP5K1B	PTV	0.0231841		0.0231841	1	No	0.910375	No
ENSG00000171608	PIK3CD	PTV+MPC>2	0.0232018		0.0232018	1	No	0.910375	No
ENSG00000167105	TMEM92	PTV	0.0232458		0.0232458	1	No	0.910375	No
ENSG00000137309	HMGA1	MPC>2	0.0233014		0.0233014	1	No	0.910375	No
ENSG00000251322	SHANK3	PTV	0.0233837		0.0233837	1	No	0.910375	No
ENSG00000129128	SPCS3	PTV+MPC>3	0.0233883		0.0233883	1	No	0.910375	No
ENSG00000103510	KAT8	PTV+MPC>2	0.0233962		0.0233962	1	No	0.910375	No
ENSG00000196591	HDAC2	PTV+MPC>2	0.0234321		0.0234321	1	No	0.910375	No
ENSG00000196338	NLGN3	PTV	0.0234572	1	0.0234572	1	No	0.910375	No
ENSG00000164107	HAND2	PTV+MPC>2	0.023484		0.023484	1	No	0.910375	No
ENSG00000196437	ZNF569	PTV	0.0235719		0.0235719	1	No	0.910375	No
ENSG00000168575	SLC20A2	PTV+MPC>2	0.0236636		0.0236636	1	No	0.910375	No
ENSG00000136531	SCN2A	PTV+MPC>2	0.023702		0.023702	1	No	0.910375	No
ENSG00000167612	ANKRD33	PTV	0.0237523		0.0237523	1	No	0.910375	No
ENSG00000186440	OR6P1	PTV	0.0237576		0.0237576	1	No	0.910375	No
ENSG00000204231	RXRB	PTV	0.0237725		0.0237725	1	No	0.910375	No
ENSG00000155846	PPARGC1B	PTV	0.0237821		0.0237821	1	No	0.910375	No
ENSG00000170561	IRX2	PTV+MPC>3	0.0238057		0.0238057	1	No	0.910375	No
ENSG00000032219	ARID4A	MPC>2	0.0238152		0.0238152	1	No	0.910375	No
ENSG00000240682	ISY1	PTV+MPC>2	0.0239975		0.0239975	1	No	0.913006	No
ENSG00000173611	SCAI	PTV	0.0240407		0.0240407	1	No	0.913006	No
ENSG00000171735	CAMTA1	PTV	0.0240785		0.0240785	1	No	0.913006	No
ENSG00000109113	RAB34	PTV	0.0240941		0.0240941	1	No	0.913006	No
ENSG00000133226	SRRM1	PTV+MPC>3	0.024137		0.024137	1	No	0.913006	No
ENSG00000215305	VPS16	PTV	0.0242487		0.0242487	1	No	0.913947	No
ENSG00000174672	BRSK2	PTV	0.0243058		0.0243058	1	No	0.913947	No
ENSG00000019169	MARCO	PTV	0.0243467		0.0243467	1	No	0.913947	No
ENSG00000109956	B3GAT1	MPC>2	0.024371		0.024371	1	No	0.913947	No
ENSG00000118985	ELL2	PTV	0.0244185		0.0244185	1	No	0.913947	No
ENSG00000154889	MPPE1	PTV	0.0244658		0.0244658	1	No	0.913947	No
ENSG00000186111	PIP5K1C	MPC>2	0.0245363		0.0245363	1	No	0.914689	No
ENSG00000163596	ICA1L	PTV	0.0247151		0.0247151	1	No	0.919454	No
ENSG00000140564	FURIN	PTV+MPC>2	0.0249343		0.0249343	1	No	0.9257	No
ENSG00000169418	NPR1	PTV	0.0251188		0.0251188	1	No	0.926276	No
ENSG00000151461	UPF2	PTV	0.0251472		0.0251472	1	No	0.926276	No
ENSG00000110911	SLC11A2	PTV	0.025173		0.025173	1	No	0.926276	No
ENSG00000198570	RD3	PTV	0.0252036		0.0252036	1	No	0.926276	No
ENSG00000124217	MOCS3	PTV	0.025242		0.025242	1	No	0.926276	No
ENSG00000131016	AKAP12	PTV	0.0252579		0.0252579	1	No	0.926276	No
ENSG00000102804	TSC22D1	PTV	0.0255248		0.0255248	1	No	0.932068	No
ENSG00000197885	NKIRAS1	PTV	0.0255252		0.0255252	1	No	0.932068	No
ENSG00000164749	HNF4G	PTV	0.0255708		0.0255708	1	No	0.932068	No
ENSG00000175414	ARL10	PTV+MPC>2	0.0256244		0.0256244	1	No	0.932138	No
ENSG00000162775	RBM15	PTV+MPC>2	0.0258135		0.0258135	1	No	0.936544	No
ENSG00000161920	MED11	PTV	0.0258493		0.0258493	1	No	0.936544	No
ENSG00000085982	USP40	PTV	0.0259081		0.0259081	1	No	0.936794	No
ENSG00000150361	KLHL1	PTV	0.0259653		0.0259653	1	No	0.936982	No
ENSG00000134684	YARS	PTV	0.0261318		0.0261318	1	No	0.940162	No
ENSG00000170442	KRT86	PTV+MPC>2	0.0261675		0.0261675	1	No	0.940162	No
ENSG00000147804	SLC39A4	PTV	0.0262097		0.0262097	1	No	0.940162	No
ENSG00000021645	NRXN3	PTV	0.0263156		0.0263156	1	No	0.942087	No
ENSG00000148229	POLE3	PTV	0.026405		0.026405	1	No	0.942369	No
ENSG00000065883	CDK13	MPC>2	0.0264745		0.0264745	1	No	0.942369	No
ENSG00000100191	SLC5A4	PTV	0.0265236		0.0265236	1	No	0.942369	No
ENSG00000133106	EPSTI1	PTV	0.0265324		0.0265324	1	No	0.942369	No
ENSG00000115760	BIRC6	PTV+MPC>2	0.0268737		0.0268737	1	No	0.943811	No
ENSG00000011523	CEP68	PTV	0.0268863		0.0268863	1	No	0.943811	No
ENSG00000165300	SLITRK5	PTV	0.0269125		0.0269125	1	No	0.943811	No
ENSG00000039987	BEST2	PTV	0.026935		0.026935	1	No	0.943811	No
ENSG00000074657	ZNF532	PTV	0.0269807		0.0269807	1	No	0.943811	No
ENSG00000246705	H2AFJ	PTV+MPC>2	0.0270844		0.0270844	1	No	0.943811	No
ENSG00000137054	POLR1E	PTV	0.0271977		0.0271977	1	No	0.943811	No
ENSG00000163421	PROK2	PTV	0.027206		0.027206	1	No	0.943811	No
ENSG00000134339	SAA2	PTV+MPC>2	0.0272123		0.0272123	1	No	0.943811	No
ENSG00000131398	KCNC3	PTV	0.0272338		0.0272338	1	No	0.943811	No
ENSG00000100445	SDR39U1	PTV	0.0273172		0.0273172	1	No	0.943811	No
ENSG00000188176	SMTNL2	PTV	0.0273636		0.0273636	1	No	0.943811	No
ENSG00000173372	C1QA	PTV+MPC>2	0.0273753		0.0273753	1	No	0.943811	No
ENSG00000171931	FBXW10	PTV	0.0273875		0.0273875	1	No	0.943811	No
ENSG00000129673	AANAT	PTV	0.0274273		0.0274273	1	No	0.943811	No
ENSG00000009724	MASP2	PTV	0.0274308		0.0274308	1	No	0.943811	No
ENSG00000173338	KCNK7	PTV	0.0275574		0.0275574	1	No	0.943811	No
ENSG00000159082	SYNJ1	PTV+MPC>2	0.0276057		0.0276057	1	No	0.943811	No
ENSG00000123836	PFKFB2	PTV+MPC>2	0.0276664		0.0276664	1	No	0.943811	No
ENSG00000188227	ZNF793	PTV	0.0277131		0.0277131	1	No	0.943811	No
ENSG00000198589	LRBA	PTV	0.0277597		0.0277597	1	No	0.943811	No
ENSG00000116785	CFHR3	PTV+MPC>3	0.0278822		0.0278822	1	No	0.943811	No
ENSG00000135525	MAP7	PTV	0.0279028		0.0279028	1	No	0.943811	No
ENSG00000196226	HIST1H2BB	PTV	0.0280399		0.0280399	1	No	0.943811	No
ENSG00000171346	KRT15	PTV	0.0281735		0.0281735	1	No	0.943811	No
ENSG00000051825	MPHOSPH9	PTV	0.0282411		0.0282411	1	No	0.943811	No
ENSG00000127603	MACF1	PTV	0.028256		0.028256	1	No	0.943811	No
ENSG00000108406	DHX40	PTV+MPC>2	0.0282711		0.0282711	1	No	0.943811	No
ENSG00000087095	NLK	PTV+MPC>2	0.0282839		0.0282839	1	No	0.943811	No
ENSG00000142235	LMTK3	PTV	0.0283275		0.0283275	1	No	0.943811	No
ENSG00000111785	RIC8B	PTV+MPC>2	0.0283979		0.0283979	1	No	0.943811	No
ENSG00000087995	METTL2A	PTV+MPC>2	0.028401		0.028401	1	No	0.943811	No
ENSG00000091583	APOH	PTV	0.0285359		0.0285359	1	No	0.943811	No
ENSG00000127337	YEATS4	PTV+MPC>2	0.0285888		0.0285888	1	No	0.943811	No
ENSG00000175175	PPM1E	MPC>2	0.0286953		0.0286953	1	No	0.943811	No
ENSG00000115241	PPM1G	PTV+MPC>3	0.0287184		0.0287184	1	No	0.943811	No
ENSG00000007372	PAX6	PTV+MPC>2	0.0288372		0.0288372	1	No	0.943811	No
ENSG00000133794	ARNTL	PTV+MPC>2	0.0288566		0.0288566	1	No	0.943811	No
ENSG00000145920	CPLX2	MPC>2	0.0288688		0.0288688	1	No	0.943811	No
ENSG00000206561	COLQ	PTV	0.0289078		0.0289078	1	No	0.943811	No
ENSG00000106327	TFR2	PTV	0.028919		0.028919	1	No	0.943811	No
ENSG00000163913	IFT122	PTV+MPC>2	0.0290313		0.0290313	1	No	0.943811	No
ENSG00000163138	PACRGL	PTV	0.0290351		0.0290351	1	No	0.943811	No
ENSG00000078295	ADCY2	PTV+MPC>2	0.0290909		0.0290909	1	No	0.943811	No
ENSG00000099804	CDC34	MPC>2	0.0291991		0.0291991	1	No	0.943811	No
ENSG00000167037	SGSM1	PTV+MPC>2	0.0292109		0.0292109	1	No	0.943811	No
ENSG00000171987	C11orf40	PTV	0.0292155		0.0292155	1	No	0.943811	No
ENSG00000182261	NLRP10	PTV	0.0292796		0.0292796	1	No	0.943811	No
ENSG00000115904	SOS1	PTV+MPC>2	0.0292871		0.0292871	1	No	0.943811	No
ENSG00000168090	COPS6	MPC>2	0.0294088		0.0294088	1	No	0.943811	No
ENSG00000184014	DENND5A	PTV	0.029443		0.029443	1	No	0.943811	No
ENSG00000177103	DSCAML1	PTV	0.0294459		0.0294459	1	No	0.943811	No
ENSG00000170522	ELOVL6	PTV+MPC>2	0.029469		0.029469	1	No	0.943811	No
ENSG00000179397	C1orf101	PTV	0.0294984		0.0294984	1	No	0.943811	No
ENSG00000100211	CBY1	PTV	0.0298028		0.0298028	1	No	0.943811	No
ENSG00000185940	KRTAP5-5	PTV	0.0298287		0.0298287	1	No	0.943811	No
ENSG00000120733	KDM3B	PTV	0.0299235		0.0299235	1	No	0.943811	No
ENSG00000140932	CMTM2	PTV	0.0299471		0.0299471	1	No	0.943811	No
ENSG00000158055	GRHL3	PTV	0.0299571		0.0299571	1	No	0.943811	No
ENSG00000113721	PDGFRB	MPC>2	0.0299954		0.0299954	1	No	0.943811	No
ENSG00000171720	HDAC3	PTV	0.0300133		0.0300133	1	No	0.943811	No
ENSG00000121152	NCAPH	PTV	0.0300383		0.0300383	1	No	0.943811	No
ENSG00000172432	GTPBP2	PTV+MPC>2	0.0301278		0.0301278	1	No	0.943811	No
ENSG00000119596	YLPM1	PTV+MPC>2	0.0301476		0.0301476	1	No	0.943811	No
ENSG00000164024	METAP1	PTV	0.0302352		0.0302352	1	No	0.943811	No
ENSG00000233412	OR5H15	PTV	0.0302671		0.0302671	1	No	0.943811	No
ENSG00000243729	OR5V1	PTV	0.0303296		0.0303296	1	No	0.943811	No
ENSG00000104093	DMXL2	PTV	0.0303778		0.0303778	1	No	0.943811	No
ENSG00000111961	SASH1	PTV	0.0304556		0.0304556	1	No	0.943811	No
ENSG00000107623	GDF10	PTV	0.0304645		0.0304645	1	No	0.943811	No
ENSG00000213654	GPSM3	PTV	0.0304645		0.0304645	1	No	0.943811	No
ENSG00000165478	HEPACAM	PTV	0.0304953		0.0304953	1	No	0.943811	No
ENSG00000174453	VWC2L	MPC>2	0.0304953		0.0304953	1	No	0.943811	No
ENSG00000105467	SYNGR4	PTV	0.0305378		0.0305378	1	No	0.943811	No
ENSG00000164398	ACSL6	PTV	0.030539		0.030539	1	No	0.943811	No
ENSG00000167858	TEKT1	PTV	0.0305484		0.0305484	1	No	0.943811	No
ENSG00000086300	SNX10	PTV	0.0307105		0.0307105	1	No	0.944021	No
ENSG00000184857	TMEM186	PTV	0.0307186		0.0307186	1	No	0.944021	No
ENSG00000183077	AFMID	PTV	0.0307674		0.0307674	1	No	0.944021	No
ENSG00000111224	PARP11	PTV	0.0307895		0.0307895	1	No	0.944021	No
ENSG00000144504	ANKMY1	PTV	0.0308168		0.0308168	1	No	0.944021	No
ENSG00000204386	NEU1	PTV	0.0308977		0.0308977	1	No	0.944546	No
ENSG00000115355	CCDC88A	MPC>2	0.0309823		0.0309823	1	No	0.944546	No
ENSG00000213906	LTB4R2	PTV	0.0310447		0.0310447	1	No	0.944546	No
ENSG00000124507	PACSIN1	PTV+MPC>2	0.0310513		0.0310513	1	No	0.944546	No
ENSG00000122565	CBX3	PTV+MPC>2	0.0312774		0.0312774	1	No	0.944546	No
ENSG00000108839	ALOX12	PTV	0.0313383		0.0313383	1	No	0.944546	No
ENSG00000115307	AUP1	PTV	0.0313822		0.0313822	1	No	0.944546	No
ENSG00000173801	JUP	PTV	0.0314742		0.0314742	1	No	0.944546	No
ENSG00000254093	PINX1	PTV	0.0314832		0.0314832	1	No	0.944546	No
ENSG00000156976	EIF4A2	PTV	0.0315628		0.0315628	1	No	0.944546	No
ENSG00000131477	RAMP2	PTV	0.0316459		0.0316459	1	No	0.944546	No
ENSG00000179750	APOBEC3B	MPC>2	0.0316886		0.0316886	1	No	0.944546	No
ENSG00000124788	ATXN1	PTV	0.031757		0.031757	1	No	0.944546	No
ENSG00000182583	VCX	PTV	0.0318239	1	0.0318239	1	No	0.944546	No
ENSG00000020129	NCDN	PTV	0.0318333		0.0318333	1	No	0.944546	No
ENSG00000143322	ABL2	PTV	0.0318689		0.0318689	1	No	0.944546	No
ENSG00000142949	PTPRF	PTV+MPC>2	0.0319118		0.0319118	1	No	0.944546	No
ENSG00000143093	STRIP1	MPC>2	0.0319211		0.0319211	1	No	0.944546	No
ENSG00000130159	ECSIT	PTV	0.0319472		0.0319472	1	No	0.944546	No
ENSG00000100285	NEFH	PTV	0.0319706		0.0319706	1	No	0.944546	No
ENSG00000241973	PI4KA	PTV+MPC>3	0.0320108		0.0320108	1	No	0.944546	No
ENSG00000159216	RUNX1	PTV	0.0320381		0.0320381	1	No	0.944546	No
ENSG00000214215	C12orf74	PTV	0.0320538		0.0320538	1	No	0.944546	No
ENSG00000146872	TLK2	PTV	0.032105		0.032105	1	No	0.944546	No
ENSG00000120937	NPPB	PTV	0.0321427		0.0321427	1	No	0.944546	No
ENSG00000166106	ADAMTS15	PTV	0.0322927		0.0322927	1	No	0.945129	No
ENSG00000179846	NKPD1	PTV	0.0323058		0.0323058	1	No	0.945129	No
ENSG00000144119	C1QL2	MPC>2	0.0323683		0.0323683	1	No	0.945129	No
ENSG00000171496	OR1L8	PTV	0.0323721		0.0323721	1	No	0.945129	No
ENSG00000144306	SCRN3	PTV	0.0325451		0.0325451	1	No	0.945417	No
ENSG00000114867	EIF4G1	PTV	0.0326406		0.0326406	1	No	0.945417	No
ENSG00000103550	KNOP1	PTV	0.0326754		0.0326754	1	No	0.945417	No
ENSG00000006652	IFRD1	PTV	0.0328131		0.0328131	1	No	0.945417	No
ENSG00000146205	ANO7	PTV	0.0328633		0.0328633	1	No	0.945417	No
ENSG00000131437	KIF3A	PTV	0.0328826		0.0328826	1	No	0.945417	No
ENSG00000137055	PLAA	MPC>2	0.0328931		0.0328931	1	No	0.945417	No
ENSG00000163462	TRIM46	PTV	0.0329244		0.0329244	1	No	0.945417	No
ENSG00000169783	LINGO1	PTV+MPC>2	0.0329511		0.0329511	1	No	0.945417	No
ENSG00000178175	ZNF366	PTV+MPC>2	0.0329664		0.0329664	1	No	0.945417	No
ENSG00000100565	C14orf166B	PTV	0.0329805		0.0329805	1	No	0.945417	No
ENSG00000113916	BCL6	PTV+MPC>3	0.0330107		0.0330107	1	No	0.945417	No
ENSG00000063176	SPHK2	PTV	0.0331896		0.0331896	1	No	0.949032	No
ENSG00000050438	SLC4A8	MPC>2	0.0332538		0.0332538	1	No	0.949329	No
ENSG00000175482	POLD4	PTV	0.0333827		0.0333827	1	No	0.949329	No
ENSG00000063438	AHRR	PTV	0.0334108		0.0334108	1	No	0.949329	No
ENSG00000150656	CNDP1	PTV	0.0334505		0.0334505	1	No	0.949329	No
ENSG00000169288	MRPL1	PTV	0.033463		0.033463	1	No	0.949329	No
ENSG00000163449	TMEM169	PTV	0.0335516		0.0335516	1	No	0.950346	No
ENSG00000168118	RAB4A	PTV	0.033639		0.033639	1	No	0.951331	No
ENSG00000181013	C17orf47	PTV	0.033707		0.033707	1	No	0.95176	No
ENSG00000215301	DDX3X	MPC>2	0.0338268	1	0.0338268	1	No	0.953277	No
ENSG00000188582	PAQR9	PTV+MPC>2	0.0338664		0.0338664	1	No	0.953277	No
ENSG00000103274	NUBP1	PTV	0.0339313		0.0339313	1	No	0.953617	No
ENSG00000185442	FAM174B	PTV	0.0341294		0.0341294	1	No	0.955128	No
ENSG00000165917	RAPSN	PTV	0.0342701		0.0342701	1	No	0.955128	No
ENSG00000242612	DECR2	PTV	0.0343044		0.0343044	1	No	0.955128	No
ENSG00000224389	C4B	PTV	0.0344663		0.0344663	1	No	0.955128	No
ENSG00000151151	IPMK	PTV	0.0344666		0.0344666	1	No	0.955128	No
ENSG00000187605	TET3	PTV+MPC>2	0.0344893		0.0344893	1	No	0.955128	No
ENSG00000135454	B4GALNT1	PTV	0.0345053		0.0345053	1	No	0.955128	No
ENSG00000084092	NOA1	PTV+MPC>2	0.0345323		0.0345323	1	No	0.955128	No
ENSG00000101191	DIDO1	PTV	0.0345885		0.0345885	1	No	0.955128	No
ENSG00000087303	NID2	PTV	0.0346372		0.0346372	1	No	0.955128	No
ENSG00000214929	SPATA31D1	PTV	0.0346503		0.0346503	1	No	0.955128	No
ENSG00000100100	PIK3IP1	PTV	0.0346574		0.0346574	1	No	0.955128	No
ENSG00000136045	PWP1	PTV+MPC>2	0.0347094		0.0347094	1	No	0.955128	No
ENSG00000196209	SIRPB2	PTV	0.0347868		0.0347868	1	No	0.955128	No
ENSG00000145491	ROPN1L	PTV	0.0348772		0.0348772	1	No	0.955128	No
ENSG00000185803	SLC52A2	PTV	0.0349949		0.0349949	1	No	0.955128	No
ENSG00000257019	OR13C2	PTV	0.0350827		0.0350827	1	No	0.955128	No
ENSG00000197008	ZNF138	PTV	0.0352116		0.0352116	1	No	0.955128	No
ENSG00000128585	MKLN1	PTV+MPC>2	0.0352764		0.0352764	1	No	0.955128	No
ENSG00000166947	EPB42	PTV	0.0352776		0.0352776	1	No	0.955128	No
ENSG00000187258	NPSR1	PTV	0.0353035		0.0353035	1	No	0.955128	No
ENSG00000133704	IPO8	PTV+MPC>2	0.0353268		0.0353268	1	No	0.955128	No
ENSG00000134262	AP4B1	PTV	0.0353353		0.0353353	1	No	0.955128	No
ENSG00000119326	CTNNAL1	PTV	0.0353714		0.0353714	1	No	0.955128	No
ENSG00000127533	F2RL3	PTV	0.0353857		0.0353857	1	No	0.955128	No
ENSG00000212916	MAP10	PTV	0.0355367		0.0355367	1	No	0.955128	No
ENSG00000065243	PKN2	PTV	0.0355725		0.0355725	1	No	0.955128	No
ENSG00000143195	ILDR2	PTV+MPC>2	0.0355807		0.0355807	1	No	0.955128	No
ENSG00000014919	COX15	PTV	0.0355871		0.0355871	1	No	0.955128	No
ENSG00000155465	SLC7A7	PTV	0.0356619		0.0356619	1	No	0.955128	No
ENSG00000188283	ZNF383	PTV	0.0356727		0.0356727	1	No	0.955128	No
ENSG00000162923	WDR26	MPC>2	0.0356834		0.0356834	1	No	0.955128	No
ENSG00000173786	CNP	PTV+MPC>2	0.035732		0.035732	1	No	0.955128	No
ENSG00000141556	TBCD	PTV	0.035844		0.035844	1	No	0.956707	No
ENSG00000181284	TMEM102	PTV	0.035983		0.035983	1	No	0.957882	No
ENSG00000197217	ENTPD4	PTV	0.0360723		0.0360723	1	No	0.957882	No
ENSG00000187492	CDHR4	PTV	0.0360828		0.0360828	1	No	0.957882	No
ENSG00000187546	AGMO	PTV	0.0361004		0.0361004	1	No	0.957882	No
ENSG00000133149	TEX13A	PTV	0.0361935	1	0.0361935	1	No	0.958109	No
ENSG00000152034	MCHR2	PTV	0.0362152		0.0362152	1	No	0.958109	No
ENSG00000167881	SRP68	PTV	0.0363875		0.0363875	1	No	0.960409	No
ENSG00000115020	PIKFYVE	PTV	0.0364506		0.0364506	1	No	0.960409	No
ENSG00000138760	SCARB2	PTV	0.0364949		0.0364949	1	No	0.960409	No
ENSG00000006194	ZNF263	PTV	0.0365153		0.0365153	1	No	0.960409	No
ENSG00000184492	FOXD4L1	PTV	0.0365718		0.0365718	1	No	0.960409	No
ENSG00000121690	DEPDC7	PTV	0.0366215		0.0366215	1	No	0.960409	No
ENSG00000138172	CALHM2	PTV	0.0367457		0.0367457	1	No	0.961055	No
ENSG00000160472	TMEM190	PTV	0.0367924		0.0367924	1	No	0.961055	No
ENSG00000070756	PABPC1	PTV+MPC>3	0.0368059		0.0368059	1	No	0.961055	No
ENSG00000089006	SNX5	PTV	0.0371001		0.0371001	1	No	0.967108	No
ENSG00000108055	SMC3	PTV+MPC>2	0.0371449		0.0371449	1	No	0.967108	No
ENSG00000139517	LNX2	PTV	0.0373274		0.0373274	1	No	0.969629	No
ENSG00000180914	OXTR	MPC>2	0.0373492		0.0373492	1	No	0.969629	No
ENSG00000141759	TXNL4A	PTV+MPC>3	0.0374656		0.0374656	1	No	0.971254	No
ENSG00000164114	MAP9	PTV	0.0376009		0.0376009	1	No	0.972024	No
ENSG00000112837	TBX18	MPC>2	0.0376031		0.0376031	1	No	0.972024	No
ENSG00000126012	KDM5C	MPC>2	0.037675	1	0.037675	1	No	0.972475	No
ENSG00000129173	E2F8	PTV	0.0377283		0.0377283	1	No	0.972475	No
ENSG00000254834	OR5M10	PTV	0.0379305		0.0379305	1	No	0.976291	No
ENSG00000115966	ATF2	PTV	0.0380628		0.0380628	1	No	0.976643	No
ENSG00000183155	RABIF	PTV	0.0381322		0.0381322	1	No	0.976643	No
ENSG00000163399	ATP1A1	PTV+MPC>2	0.0381508		0.0381508	1	No	0.976643	No
ENSG00000164411	GJB7	PTV	0.0381607		0.0381607	1	No	0.976643	No
ENSG00000100628	ASB2	MPC>2	0.0382173		0.0382173	1	No	0.976707	No
ENSG00000136155	SCEL	PTV	0.0382799		0.0382799	1	No	0.976924	No
ENSG00000104888	SLC17A7	PTV+MPC>2	0.0384337		0.0384337	1	No	0.977808	No
ENSG00000005955	GGNBP2	PTV+MPC>2	0.038504		0.038504	1	No	0.977808	No
ENSG00000134490	TMEM241	PTV	0.0386161		0.0386161	1	No	0.977808	No
ENSG00000198915	RASGEF1A	PTV	0.0386243		0.0386243	1	No	0.977808	No
ENSG00000149243	KLHL35	PTV	0.0386799		0.0386799	1	No	0.977808	No
ENSG00000001630	CYP51A1	PTV	0.03868		0.03868	1	No	0.977808	No
ENSG00000198160	MIER1	PTV	0.038694		0.038694	1	No	0.977808	No
ENSG00000135245	HILPDA	PTV	0.0388168		0.0388168	1	No	0.979187	No
ENSG00000149499	EML3	PTV+MPC>2	0.0388571		0.0388571	1	No	0.979187	No
ENSG00000145349	CAMK2D	MPC>2	0.0389667		0.0389667	1	No	0.979741	No
ENSG00000168158	OR2C1	PTV	0.0389877		0.0389877	1	No	0.979741	No
ENSG00000134532	SOX5	MPC>2	0.0391261		0.0391261	1	No	0.981819	No
ENSG00000106331	PAX4	PTV	0.0392074		0.0392074	1	No	0.981819	No
ENSG00000169105	CHST14	PTV+MPC>2	0.0392507		0.0392507	1	No	0.981819	No
ENSG00000128645	HOXD1	PTV	0.0393698		0.0393698	1	No	0.981819	No
ENSG00000100519	PSMC6	PTV+MPC>2	0.0393966		0.0393966	1	No	0.981819	No
ENSG00000157778	PSMG3	PTV	0.0394034		0.0394034	1	No	0.981819	No
ENSG00000157214	STEAP2	PTV	0.0394887		0.0394887	1	No	0.981819	No
ENSG00000107362	ABHD17B	PTV+MPC>2	0.039531		0.039531	1	No	0.981819	No
ENSG00000155366	RHOC	MPC>2	0.0395753		0.0395753	1	No	0.981819	No
ENSG00000108292	MLLT6	PTV+MPC>2	0.0396145		0.0396145	1	No	0.981819	No
ENSG00000184156	KCNQ3	MPC>2	0.0396776		0.0396776	1	No	0.982034	No
ENSG00000106066	CPVL	PTV	0.0398895		0.0398895	1	No	0.982409	No
ENSG00000100577	GSTZ1	PTV	0.0398905		0.0398905	1	No	0.982409	No
ENSG00000198742	SMURF1	PTV+MPC>2	0.0399069		0.0399069	1	No	0.982409	No
ENSG00000137310	TCF19	PTV	0.0399105		0.0399105	1	No	0.982409	No
ENSG00000175274	TP53I11	PTV	0.0399773		0.0399773	1	No	0.982711	No
ENSG00000005075	POLR2J	MPC>2	0.0401161		0.0401161	1	No	0.982985	No
ENSG00000120696	KBTBD7	PTV+MPC>2	0.0401434		0.0401434	1	No	0.982985	No
ENSG00000167613	LAIR1	PTV+MPC>2	0.0401519		0.0401519	1	No	0.982985	No
ENSG00000160917	CPSF4	PTV+MPC>3	0.0402914		0.0402914	1	No	0.98377	No
ENSG00000008853	RHOBTB2	PTV+MPC>2	0.040293		0.040293	1	No	0.98377	No
ENSG00000139641	ESYT1	PTV	0.0404237		0.0404237	1	No	0.984884	No
ENSG00000110975	SYT10	PTV	0.0405672		0.0405672	1	No	0.984884	No
ENSG00000142208	AKT1	PTV+MPC>3	0.0407578		0.0407578	1	No	0.984884	No
ENSG00000008130	NADK	PTV	0.0407632		0.0407632	1	No	0.984884	No
ENSG00000159692	CTBP1	PTV+MPC>3	0.0407693		0.0407693	1	No	0.984884	No
ENSG00000163092	XIRP2	PTV	0.0408299		0.0408299	1	No	0.984884	No
ENSG00000172530	BANP	PTV+MPC>2	0.0408688		0.0408688	1	No	0.984884	No
ENSG00000130723	PRRC2B	PTV	0.0408725		0.0408725	1	No	0.984884	No
ENSG00000160007	ARHGAP35	PTV	0.040873		0.040873	1	No	0.984884	No
ENSG00000174233	ADCY6	PTV	0.0409436		0.0409436	1	No	0.984884	No
ENSG00000205220	PSMB10	PTV+MPC>2	0.041001		0.041001	1	No	0.984884	No
ENSG00000116117	PARD3B	PTV	0.0410077		0.0410077	1	No	0.984884	No
ENSG00000183598	HIST2H3D	PTV+MPC>2	0.0411357		0.0411357	1	No	0.984884	No
ENSG00000173947	PIFO	PTV	0.0414248		0.0414248	1	No	0.984884	No
ENSG00000176087	SLC35A4	PTV	0.0414353		0.0414353	1	No	0.984884	No
ENSG00000083750	RRAGB	MPC>2	0.0414425	1	0.0414425	1	No	0.984884	No
ENSG00000160111	CPAMD8	PTV+MPC>2	0.0415226		0.0415226	1	No	0.984884	No
ENSG00000068971	PPP2R5B	PTV+MPC>2	0.0415999		0.0415999	1	No	0.984884	No
ENSG00000101266	CSNK2A1	PTV	0.0416297		0.0416297	1	No	0.984884	No
ENSG00000164849	GPR146	PTV	0.0416626		0.0416626	1	No	0.984884	No
ENSG00000119912	IDE	PTV	0.0417164		0.0417164	1	No	0.984884	No
ENSG00000204970	PCDHA1	PTV	0.0417927		0.0417927	1	No	0.984884	No
ENSG00000099338	CATSPERG	PTV+MPC>2	0.0418033		0.0418033	1	No	0.984884	No
ENSG00000101577	LPIN2	PTV	0.0418268		0.0418268	1	No	0.984884	No
ENSG00000136485	DCAF7	PTV	0.0418444		0.0418444	1	No	0.984884	No
ENSG00000185024	BRF1	PTV	0.0418892		0.0418892	1	No	0.984884	No
ENSG00000144233	AMMECR1L	PTV+MPC>2	0.0419002		0.0419002	1	No	0.984884	No
ENSG00000181381	DDX60L	PTV	0.0419153		0.0419153	1	No	0.984884	No
ENSG00000169855	ROBO1	PTV	0.0419272		0.0419272	1	No	0.984884	No
ENSG00000145362	ANK2	PTV+MPC>2	0.0420192		0.0420192	1	No	0.984884	No
ENSG00000119314	PTBP3	PTV+MPC>2	0.0420308		0.0420308	1	No	0.984884	No
ENSG00000157350	ST3GAL2	MPC>2	0.0421665		0.0421665	1	No	0.986625	No
ENSG00000139714	MORN3	PTV	0.042222		0.042222	1	No	0.986625	No
ENSG00000163507	KIAA1524	PTV	0.0422691		0.0422691	1	No	0.986625	No
ENSG00000172803	SNX32	PTV	0.0424453		0.0424453	1	No	0.98667	No
ENSG00000221852	KRTAP1-5	PTV	0.0424705		0.0424705	1	No	0.98667	No
ENSG00000152433	ZNF547	PTV	0.0425352		0.0425352	1	No	0.98667	No
ENSG00000168229	PTGDR	PTV	0.0425681		0.0425681	1	No	0.98667	No
ENSG00000176973	FAM89B	PTV+MPC>2	0.0425804		0.0425804	1	No	0.98667	No
ENSG00000171094	ALK	PTV	0.0426514		0.0426514	1	No	0.98667	No
ENSG00000114113	RBP2	PTV	0.0426969		0.0426969	1	No	0.98667	No
ENSG00000170633	RNF34	PTV	0.0427316		0.0427316	1	No	0.98667	No
ENSG00000122691	TWIST1	PTV+MPC>2	0.0427984		0.0427984	1	No	0.98667	No
ENSG00000241945	PWP2	PTV	0.0428481		0.0428481	1	No	0.98667	No
ENSG00000175115	PACS1	PTV	0.0428725		0.0428725	1	No	0.98667	No
ENSG00000182872	RBM10	PTV+MPC>2	0.0430284	1	0.0430284	1	No	0.988996	No
ENSG00000105784	RUNDC3B	PTV	0.0432017		0.0432017	1	No	0.990621	No
ENSG00000143631	FLG	PTV	0.0432922		0.0432922	1	No	0.990621	No
ENSG00000149651	SPINT4	PTV	0.0433033		0.0433033	1	No	0.990621	No
ENSG00000182795	C1orf116	PTV	0.0433362		0.0433362	1	No	0.990621	No
ENSG00000116147	TNR	PTV	0.0434281		0.0434281	1	No	0.990621	No
ENSG00000170577	SIX2	PTV	0.0434285		0.0434285	1	No	0.990621	No
ENSG00000125815	CST8	PTV	0.0435843		0.0435843	1	No	0.99292	No
ENSG00000111554	MDM1	PTV	0.0437629		0.0437629	1	No	0.995548	No
ENSG00000131507	NDFIP1	PTV+MPC>2	0.0439329		0.0439329	1	No	0.995548	No
ENSG00000100578	KIAA0586	PTV	0.0439407		0.0439407	1	No	0.995548	No
ENSG00000047365	ARAP2	PTV	0.0440163		0.0440163	1	No	0.995548	No
ENSG00000129682	FGF13	PTV+MPC>2	0.0440489	1	0.0440489	1	No	0.995548	No
ENSG00000160075	SSU72	PTV+MPC>3	0.0441115		0.0441115	1	No	0.995548	No
ENSG00000205707	LYRM5	PTV	0.0441459		0.0441459	1	No	0.995548	No
ENSG00000187210	GCNT1	PTV	0.0442301		0.0442301	1	No	0.995548	No
ENSG00000169696	ASPSCR1	PTV	0.0442507		0.0442507	1	No	0.995548	No
ENSG00000133997	MED6	PTV	0.0442515		0.0442515	1	No	0.995548	No
ENSG00000137841	PLCB2	PTV	0.0443421		0.0443421	1	No	0.995654	No
ENSG00000197128	ZNF772	PTV	0.0443665		0.0443665	1	No	0.995654	No
ENSG00000070961	ATP2B1	PTV+MPC>3	0.0445316		0.0445316	1	No	0.998109	No
ENSG00000129472	RAB2B	PTV	0.0446933		0.0446933	1	No	0.998109	No
ENSG00000109606	DHX15	PTV	0.0447829		0.0447829	1	No	0.998109	No
ENSG00000157423	HYDIN	PTV	0.0447999		0.0447999	1	No	0.998109	No
ENSG00000168795	ZBTB5	PTV	0.0448033		0.0448033	1	No	0.998109	No
ENSG00000167920	TMEM99	PTV	0.0448457		0.0448457	1	No	0.998109	No
ENSG00000150269	OR5M9	PTV	0.0449071		0.0449071	1	No	0.998109	No
ENSG00000231213	PLSCR5	PTV	0.0449185		0.0449185	1	No	0.998109	No
ENSG00000138468	SENP7	PTV	0.0451583		0.0451583	1	No	0.999872	No
ENSG00000152684	PELO	PTV	0.0451674		0.0451674	1	No	0.999872	No
ENSG00000145248	SLC10A4	PTV+MPC>2	0.0452787		0.0452787	1	No	0.999872	No
ENSG00000239382	ALKBH6	PTV+MPC>2	0.0453811		0.0453811	1	No	0.999872	No
ENSG00000104408	EIF3E	PTV+MPC>2	0.0453946		0.0453946	1	No	0.999872	No
ENSG00000175105	ZNF654	PTV	0.045449		0.045449	1	No	0.999872	No
ENSG00000117650	NEK2	PTV	0.0454832		0.0454832	1	No	0.999872	No
ENSG00000074966	TXK	PTV	0.0456418		0.0456418	1	No	0.999872	No
ENSG00000156162	DPY19L4	PTV	0.0457844		0.0457844	1	No	0.999872	No
ENSG00000130818	ZNF426	PTV	0.0457974		0.0457974	1	No	0.999872	No
ENSG00000065618	COL17A1	PTV	0.0458283		0.0458283	1	No	0.999872	No
ENSG00000169239	CA5B	PTV	0.0459278	1	0.0459278	1	No	0.999872	No
ENSG00000112473	SLC39A7	PTV	0.046119		0.046119	1	No	0.999872	No
ENSG00000197641	SERPINB13	PTV	0.0461853		0.0461853	1	No	0.999872	No
ENSG00000159363	ATP13A2	PTV	0.0462871		0.0462871	1	No	0.999872	No
ENSG00000139780	METTL21C	PTV	0.0462898		0.0462898	1	No	0.999872	No
ENSG00000128268	MGAT3	PTV	0.0462903		0.0462903	1	No	0.999872	No
ENSG00000184886	PIGW	PTV	0.0463232		0.0463232	1	No	0.999872	No
ENSG00000078403	MLLT10	PTV+MPC>2	0.0463745		0.0463745	1	No	0.999872	No
ENSG00000173302	GPR148	PTV	0.0463819		0.0463819	1	No	0.999872	No
ENSG00000163348	PYGO2	PTV	0.046407		0.046407	1	No	0.999872	No
ENSG00000072849	DERL2	PTV	0.0465745		0.0465745	1	No	0.999872	No
ENSG00000183671	GPR1	PTV	0.046588		0.046588	1	No	0.999872	No
ENSG00000166289	PLEKHF1	PTV+MPC>2	0.0466336		0.0466336	1	No	0.999872	No
ENSG00000116871	MAP7D1	MPC>2	0.046639		0.046639	1	No	0.999872	No
ENSG00000110321	EIF4G2	PTV	0.0467092		0.0467092	1	No	0.999872	No
ENSG00000135637	CCDC142	MPC>2	0.0469199		0.0469199	1	No	0.999872	No
ENSG00000010295	IFFO1	PTV	0.0469462		0.0469462	1	No	0.999872	No
ENSG00000141627	DYM	PTV	0.0469657		0.0469657	1	No	0.999872	No
ENSG00000115556	PLCD4	PTV	0.047115		0.047115	1	No	0.999872	No
ENSG00000019144	PHLDB1	PTV+MPC>2	0.0471422		0.0471422	1	No	0.999872	No
ENSG00000073150	PANX2	PTV+MPC>3	0.0472591		0.0472591	1	No	0.999872	No
ENSG00000169814	BTD	PTV	0.0473753		0.0473753	1	No	0.999872	No
ENSG00000050555	LAMC3	PTV	0.047445		0.047445	1	No	0.999872	No
ENSG00000107186	MPDZ	PTV	0.0474501		0.0474501	1	No	0.999872	No
ENSG00000204687	MAS1L	PTV	0.0474935		0.0474935	1	No	0.999872	No
ENSG00000064655	EYA2	MPC>2	0.0476529		0.0476529	1	No	0.999872	No
ENSG00000159905	ZNF221	PTV	0.0476734		0.0476734	1	No	0.999872	No
ENSG00000012124	CD22	PTV	0.0476788		0.0476788	1	No	0.999872	No
ENSG00000076555	ACACB	PTV	0.0478478		0.0478478	1	No	0.999872	No
ENSG00000185294	SPPL2C	PTV	0.0478595		0.0478595	1	No	0.999872	No
ENSG00000083067	TRPM3	MPC>2	0.0478751		0.0478751	1	No	0.999872	No
ENSG00000213892	CEACAM16	PTV	0.0480436		0.0480436	1	No	0.999872	No
ENSG00000140199	SLC12A6	PTV+MPC>2	0.0480545		0.0480545	1	No	0.999872	No
ENSG00000152822	GRM1	PTV	0.0481147		0.0481147	1	No	0.999872	No
ENSG00000114626	ABTB1	PTV	0.0482216		0.0482216	1	No	0.999872	No
ENSG00000230453	ANKRD18B	PTV	0.0482657		0.0482657	1	No	0.999872	No
ENSG00000244405	ETV5	MPC>2	0.0483623		0.0483623	1	No	0.999872	No
ENSG00000164066	INTU	PTV	0.0485095		0.0485095	1	No	0.999872	No
ENSG00000109790	KLHL5	PTV	0.0487254		0.0487254	1	No	0.999872	No
ENSG00000070808	CAMK2A	PTV+MPC>3	0.0488049		0.0488049	1	No	0.999872	No
ENSG00000120254	MTHFD1L	PTV	0.0488089		0.0488089	1	No	0.999872	No
ENSG00000105619	TFPT	MPC>2	0.0488367		0.0488367	1	No	0.999872	No
ENSG00000075151	EIF4G3	PTV	0.0489186		0.0489186	1	No	0.999872	No
ENSG00000167139	TBC1D21	PTV	0.0490208		0.0490208	1	No	0.999872	No
ENSG00000187134	AKR1C1	PTV+MPC>3	0.0490369		0.0490369	1	No	0.999872	No
ENSG00000115687	PASK	PTV	0.0490858		0.0490858	1	No	0.999872	No
ENSG00000137968	SLC44A5	PTV	0.0490909		0.0490909	1	No	0.999872	No
ENSG00000065534	MYLK	PTV	0.0491049		0.0491049	1	No	0.999872	No
ENSG00000012504	NR1H4	PTV	0.049118		0.049118	1	No	0.999872	No
ENSG00000134365	CFHR4	PTV+MPC>2	0.0492101		0.0492101	1	No	0.999872	No
ENSG00000062096	ARSF	PTV	0.0493001	1	0.0493001	1	No	0.999872	No
ENSG00000174130	TLR6	PTV	0.0493384		0.0493384	1	No	0.999872	No
ENSG00000163938	GNL3	PTV	0.0493626		0.0493626	1	No	0.999872	No
ENSG00000186777	ZNF732	PTV	0.0493637		0.0493637	1	No	0.999872	No
ENSG00000153822	KCNJ16	PTV	0.0493726		0.0493726	1	No	0.999872	No
ENSG00000114978	MOB1A	PTV+MPC>2	0.0495212		0.0495212	1	No	0.999872	No
ENSG00000157703	SVOPL	PTV	0.0495494		0.0495494	1	No	0.999872	No
ENSG00000170017	ALCAM	PTV	0.0496299		0.0496299	1	No	0.999872	No
ENSG00000136040	PLXNC1	PTV+MPC>2	0.0496714		0.0496714	1	No	0.999872	No
ENSG00000119333	WDR34	PTV	0.0498283		0.0498283	1	No	0.999872	No
ENSG00000116560	SFPQ	MPC>2	0.0498446		0.0498446	1	No	0.999872	No
ENSG00000068654	POLR1A	PTV	0.0498678		0.0498678	1	No	0.999872	No
ENSG00000168936	TMEM129	PTV	0.0499064		0.0499064	1	No	0.999872	No
ENSG00000183691	NOG	PTV+MPC>2	0.0499319		0.0499319	1	No	0.999872	No
ENSG00000205593	DENND6B	PTV	0.0499824		0.0499824	1	No	0.999872	No
ENSG00000145217	SLC26A1	PTV	0.0499885		0.0499885	1	No	0.999872	No
ENSG00000182791	CCDC87	PTV	0.0499914		0.0499914	1	No	0.999872	No
ENSG00000159199	ATP5G1	PTV	0.0500723		0.0500723	1	No	0.999872	No
ENSG00000136144	RCBTB1	PTV	0.0501549		0.0501549	1	No	0.999872	No
ENSG00000118322	ATP10B	PTV	0.050262		0.050262	1	No	0.999872	No
ENSG00000104490	NCALD	PTV	0.0503648		0.0503648	1	No	0.999872	No
ENSG00000108312	UBTF	PTV	0.0503648		0.0503648	1	No	0.999872	No
ENSG00000176396	EID2	PTV	0.0503648		0.0503648	1	No	0.999872	No
ENSG00000142910	TINAGL1	PTV	0.0504193		0.0504193	1	No	0.999872	No
ENSG00000165124	SVEP1	PTV+MPC>2	0.0504885		0.0504885	1	No	0.999872	No
ENSG00000160710	ADAR	PTV+MPC>2	0.0505732		0.0505732	1	No	0.999872	No
ENSG00000101084	C20orf24	PTV	0.0505943		0.0505943	1	No	0.999872	No
ENSG00000138668	HNRNPD	PTV	0.0505943		0.0505943	1	No	0.999872	No
ENSG00000140350	ANP32A	PTV	0.0505943		0.0505943	1	No	0.999872	No
ENSG00000158955	WNT9B	PTV	0.0505943		0.0505943	1	No	0.999872	No
ENSG00000100124	ANKRD54	PTV	0.0506576		0.0506576	1	No	0.999872	No
ENSG00000164326	CARTPT	PTV	0.0507189		0.0507189	1	No	0.999872	No
ENSG00000126698	DNAJC8	MPC>2	0.0508546		0.0508546	1	No	0.999872	No
ENSG00000174276	ZNHIT2	PTV	0.0509098		0.0509098	1	No	0.999872	No
ENSG00000173166	RAPH1	PTV	0.0510302		0.0510302	1	No	0.999872	No
ENSG00000080298	RFX3	PTV+MPC>3	0.0511299		0.0511299	1	No	0.999872	No
ENSG00000134551	PRH2	MPC>2	0.0511583		0.0511583	1	No	0.999872	No
ENSG00000132475	H3F3B	PTV+MPC>3	0.0511702		0.0511702	1	No	0.999872	No
ENSG00000022567	SLC45A4	PTV	0.0512502		0.0512502	1	No	0.999872	No
ENSG00000143595	AQP10	PTV	0.0513265		0.0513265	1	No	0.999872	No
ENSG00000165832	TRUB1	PTV	0.051353		0.051353	1	No	0.999872	No
ENSG00000087460	GNAS	PTV	0.051414		0.051414	1	No	0.999872	No
ENSG00000114416	FXR1	MPC>2	0.0514461		0.0514461	1	No	0.999872	No
ENSG00000124243	BCAS4	PTV	0.051618		0.051618	1	No	0.999872	No
ENSG00000174010	KLHL15	PTV	0.051618	1	0.051618	1	No	0.999872	No
ENSG00000258890	CEP95	PTV	0.0517919		0.0517919	1	No	0.999872	No
ENSG00000144228	SPOPL	PTV	0.0518802		0.0518802	1	No	0.999872	No
ENSG00000140522	RLBP1	PTV	0.0519046		0.0519046	1	No	0.999872	No
ENSG00000143368	SF3B4	MPC>2	0.0520456		0.0520456	1	No	0.999872	No
ENSG00000068745	IP6K2	PTV+MPC>2	0.0520656		0.0520656	1	No	0.999872	No
ENSG00000103507	BCKDK	PTV	0.0521169		0.0521169	1	No	0.999872	No
ENSG00000126778	SIX1	PTV	0.0522071		0.0522071	1	No	0.999872	No
ENSG00000166444	ST5	PTV	0.0522493		0.0522493	1	No	0.999872	No
ENSG00000136444	RSAD1	PTV	0.0522929		0.0522929	1	No	0.999872	No
ENSG00000086991	NOX4	PTV	0.0523823		0.0523823	1	No	0.999872	No
ENSG00000250571	GLI4	PTV	0.0524686		0.0524686	1	No	0.999872	No
ENSG00000144218	AFF3	PTV	0.0526705		0.0526705	1	No	0.999872	No
ENSG00000153201	RANBP2	PTV+MPC>2	0.0527427		0.0527427	1	No	0.999872	No
ENSG00000119283	TRIM67	PTV	0.0527843		0.0527843	1	No	0.999872	No
ENSG00000119946	CNNM1	PTV	0.0528718		0.0528718	1	No	0.999872	No
ENSG00000111639	MRPL51	PTV	0.052902		0.052902	1	No	0.999872	No
ENSG00000083097	DOPEY1	PTV	0.0529566		0.0529566	1	No	0.999872	No
ENSG00000089094	KDM2B	PTV	0.0530027		0.0530027	1	No	0.999872	No
ENSG00000099797	TECR	PTV+MPC>2	0.0532124		0.0532124	1	No	0.999872	No
ENSG00000128656	CHN1	PTV	0.0532702		0.0532702	1	No	0.999872	No
ENSG00000144820	GPR128	PTV	0.0532714		0.0532714	1	No	0.999872	No
ENSG00000001629	ANKIB1	PTV	0.0533017		0.0533017	1	No	0.999872	No
ENSG00000161714	PLCD3	PTV+MPC>2	0.0533695		0.0533695	1	No	0.999872	No
ENSG00000174136	RGMB	PTV	0.0533697		0.0533697	1	No	0.999872	No
ENSG00000099284	H2AFY2	PTV	0.0533701		0.0533701	1	No	0.999872	No
ENSG00000169714	CNBP	MPC>2	0.0534141		0.0534141	1	No	0.999872	No
ENSG00000136982	DSCC1	PTV	0.0536864		0.0536864	1	No	0.999872	No
ENSG00000122877	EGR2	PTV+MPC>2	0.0537241		0.0537241	1	No	0.999872	No
ENSG00000139926	FRMD6	PTV	0.0538567		0.0538567	1	No	0.999872	No
ENSG00000011332	DPF1	MPC>2	0.0538709		0.0538709	1	No	0.999872	No
ENSG00000183474	GTF2H2C	PTV+MPC>2	0.0540615		0.0540615	1	No	0.999872	No
ENSG00000165238	WNK2	PTV+MPC>2	0.0542587		0.0542587	1	No	0.999872	No
ENSG00000205730	ITPRIPL2	PTV	0.0543129		0.0543129	1	No	0.999872	No
ENSG00000108883	EFTUD2	PTV+MPC>2	0.0543712		0.0543712	1	No	0.999872	No
ENSG00000253873	PCDHGA11	PTV	0.0546452		0.0546452	1	No	0.999872	No
ENSG00000118515	SGK1	PTV+MPC>2	0.0546575		0.0546575	1	No	0.999872	No
ENSG00000171960	PPIH	PTV	0.0547024		0.0547024	1	No	0.999872	No
ENSG00000061918	GUCY1B3	PTV+MPC>2	0.0547614		0.0547614	1	No	0.999872	No
ENSG00000150967	ABCB9	PTV	0.0547625		0.0547625	1	No	0.999872	No
ENSG00000146700	SRCRB4D	PTV	0.0548314		0.0548314	1	No	0.999872	No
ENSG00000163468	CCT3	PTV	0.054874		0.054874	1	No	0.999872	No
ENSG00000137462	TLR2	PTV	0.0549162		0.0549162	1	No	0.999872	No
ENSG00000137955	RABGGTB	PTV	0.0549673		0.0549673	1	No	0.999872	No
ENSG00000121210	KIAA0922	PTV	0.0549722		0.0549722	1	No	0.999872	No
ENSG00000121594	CD80	PTV	0.0549853		0.0549853	1	No	0.999872	No
ENSG00000005073	HOXA11	PTV+MPC>2	0.05512		0.05512	1	No	0.999872	No
ENSG00000173638	SLC19A1	PTV	0.0552011		0.0552011	1	No	0.999872	No
ENSG00000184166	OR1D2	PTV	0.0552052		0.0552052	1	No	0.999872	No
ENSG00000175764	TTLL11	PTV	0.0552315		0.0552315	1	No	0.999872	No
ENSG00000197444	OGDHL	PTV	0.05531		0.05531	1	No	0.999872	No
ENSG00000105821	DNAJC2	PTV	0.0553448		0.0553448	1	No	0.999872	No
ENSG00000180113	TDRD6	PTV	0.0553494		0.0553494	1	No	0.999872	No
ENSG00000101940	WDR13	MPC>2	0.0554405	1	0.0554405	1	No	0.999872	No
ENSG00000182180	MRPS16	PTV	0.0556073		0.0556073	1	No	0.999872	No
ENSG00000126861	OMG	PTV	0.0557085		0.0557085	1	No	0.999872	No
ENSG00000011258	MBTD1	PTV+MPC>2	0.0557358		0.0557358	1	No	0.999872	No
ENSG00000084623	EIF3I	PTV+MPC>2	0.0558842		0.0558842	1	No	0.999872	No
ENSG00000106714	CNTNAP3	PTV	0.05596		0.05596	1	No	0.999872	No
ENSG00000135298	BAI3	PTV	0.0561349		0.0561349	1	No	0.999872	No
ENSG00000133961	NUMB	PTV+MPC>2	0.0561748		0.0561748	1	No	0.999872	No
ENSG00000257103	LSM14A	PTV+MPC>2	0.0562315		0.0562315	1	No	0.999872	No
ENSG00000198435	NRARP	MPC>2	0.0563146		0.0563146	1	No	0.999872	No
ENSG00000185800	DMWD	PTV	0.0565494		0.0565494	1	No	0.999872	No
ENSG00000125741	OPA3	PTV+MPC>2	0.0565793		0.0565793	1	No	0.999872	No
ENSG00000072803	FBXW11	PTV+MPC>2	0.0565795		0.0565795	1	No	0.999872	No
ENSG00000062598	ELMO2	MPC>2	0.056691		0.056691	1	No	0.999872	No
ENSG00000256235	SMIM3	PTV	0.0568459		0.0568459	1	No	0.999872	No
ENSG00000167925	GHDC	PTV	0.056886		0.056886	1	No	0.999872	No
ENSG00000187553	CYP26C1	MPC>2	0.0569042		0.0569042	1	No	0.999872	No
ENSG00000175575	PAAF1	PTV	0.0569632		0.0569632	1	No	0.999872	No
ENSG00000070061	IKBKAP	PTV	0.0569883		0.0569883	1	No	0.999872	No
ENSG00000144354	CDCA7	PTV+MPC>3	0.0572012		0.0572012	1	No	0.999872	No
ENSG00000143952	VPS54	PTV	0.0572874		0.0572874	1	No	0.999872	No
ENSG00000188428	BLOC1S5	PTV	0.0573032		0.0573032	1	No	0.999872	No
ENSG00000100417	PMM1	PTV	0.0574381		0.0574381	1	No	0.999872	No
ENSG00000170421	KRT8	PTV	0.0574985		0.0574985	1	No	0.999872	No
ENSG00000061492	WNT8A	PTV	0.0575914		0.0575914	1	No	0.999872	No
ENSG00000176658	MYO1D	PTV	0.0576207		0.0576207	1	No	0.999872	No
ENSG00000164953	TMEM67	PTV	0.0578525		0.0578525	1	No	0.999872	No
ENSG00000181450	ZNF678	PTV	0.0579614		0.0579614	1	No	0.999872	No
ENSG00000167986	DDB1	PTV+MPC>3	0.0579765		0.0579765	1	No	0.999872	No
ENSG00000082014	SMARCD3	PTV+MPC>2	0.0581864		0.0581864	1	No	0.999872	No
ENSG00000163218	PGLYRP4	PTV	0.0582039		0.0582039	1	No	0.999872	No
ENSG00000151322	NPAS3	MPC>2	0.0582425		0.0582425	1	No	0.999872	No
ENSG00000133884	DPF2	PTV+MPC>2	0.058303		0.058303	1	No	0.999872	No
ENSG00000124608	AARS2	PTV	0.0584483		0.0584483	1	No	0.999872	No
ENSG00000047936	ROS1	PTV	0.05856		0.05856	1	No	0.999872	No
ENSG00000187783	TMEM72	PTV	0.0585954		0.0585954	1	No	0.999872	No
ENSG00000043143	JADE2	MPC>2	0.0586779		0.0586779	1	No	0.999872	No
ENSG00000189227	C15orf61	PTV	0.0586938		0.0586938	1	No	0.999872	No
ENSG00000206075	SERPINB5	PTV	0.0586942		0.0586942	1	No	0.999872	No
ENSG00000186431	FCAR	PTV	0.0587767		0.0587767	1	No	0.999872	No
ENSG00000133302	ANKRD32	PTV	0.0588522		0.0588522	1	No	0.999872	No
ENSG00000102098	SCML2	PTV+MPC>2	0.058853	1	0.058853	1	No	0.999872	No
ENSG00000127081	ZNF484	PTV	0.0589267		0.0589267	1	No	0.999872	No
ENSG00000197721	CR1L	PTV	0.0589337		0.0589337	1	No	0.999872	No
ENSG00000100228	RAB36	PTV	0.0589575		0.0589575	1	No	0.999872	No
ENSG00000138792	ENPEP	PTV	0.0590201		0.0590201	1	No	0.999872	No
ENSG00000125657	TNFSF9	PTV	0.0590359		0.0590359	1	No	0.999872	No
ENSG00000174957	OR5J2	PTV	0.0590734		0.0590734	1	No	0.999872	No
ENSG00000140284	SLC27A2	PTV+MPC>2	0.059103		0.059103	1	No	0.999872	No
ENSG00000092758	COL9A3	PTV	0.0592705		0.0592705	1	No	0.999872	No
ENSG00000104894	CD37	PTV	0.0593753		0.0593753	1	No	0.999872	No
ENSG00000167487	KLHL26	PTV+MPC>2	0.0595242		0.0595242	1	No	0.999872	No
ENSG00000065675	PRKCQ	PTV	0.0596397		0.0596397	1	No	0.999872	No
ENSG00000159871	LYPD5	PTV	0.0596567		0.0596567	1	No	0.999872	No
ENSG00000083817	ZNF416	PTV	0.059657		0.059657	1	No	0.999872	No
ENSG00000177000	MTHFR	PTV	0.0597759		0.0597759	1	No	0.999872	No
ENSG00000130748	TMEM160	MPC>2	0.0598837		0.0598837	1	No	0.999872	No
ENSG00000196844	PATE2	PTV	0.0599343		0.0599343	1	No	0.999872	No
ENSG00000058453	CROCC	PTV+MPC>2	0.0599476		0.0599476	1	No	0.999872	No
ENSG00000136816	TOR1B	PTV	0.0600938		0.0600938	1	No	0.999872	No
ENSG00000168778	TCTN2	PTV	0.0603571		0.0603571	1	No	0.999872	No
ENSG00000173264	GPR137	PTV+MPC>2	0.0603964		0.0603964	1	No	0.999872	No
ENSG00000197619	ZNF615	PTV	0.0604217		0.0604217	1	No	0.999872	No
ENSG00000186470	BTN3A2	MPC>2	0.0605515		0.0605515	1	No	0.999872	No
ENSG00000117013	KCNQ4	MPC>2	0.0606381		0.0606381	1	No	0.999872	No
ENSG00000163257	DCAF16	PTV	0.0606642		0.0606642	1	No	0.999872	No
ENSG00000132549	VPS13B	PTV	0.0608247		0.0608247	1	No	0.999872	No
ENSG00000183439	TRIM61	PTV+MPC>2	0.0609252		0.0609252	1	No	0.999872	No
ENSG00000096088	PGC	PTV	0.0609276		0.0609276	1	No	0.999872	No
ENSG00000130377	ACSBG2	PTV	0.0610587		0.0610587	1	No	0.999872	No
ENSG00000100650	SRSF5	PTV+MPC>2	0.0611403		0.0611403	1	No	0.999872	No
ENSG00000165804	ZNF219	PTV+MPC>2	0.0611873		0.0611873	1	No	0.999872	No
ENSG00000119707	RBM25	PTV+MPC>2	0.0612493		0.0612493	1	No	0.999872	No
ENSG00000100504	PYGL	PTV	0.061255		0.061255	1	No	0.999872	No
ENSG00000176095	IP6K1	PTV	0.061412		0.061412	1	No	0.999872	No
ENSG00000258484	SPESP1	PTV	0.0614705		0.0614705	1	No	0.999872	No
ENSG00000151491	EPS8	PTV	0.0614706		0.0614706	1	No	0.999872	No
ENSG00000133216	EPHB2	PTV+MPC>2	0.0615051		0.0615051	1	No	0.999872	No
ENSG00000132406	TMEM128	PTV	0.0615084		0.0615084	1	No	0.999872	No
ENSG00000100053	CRYBB3	PTV	0.0615877		0.0615877	1	No	0.999872	No
ENSG00000162065	TBC1D24	PTV	0.0615976		0.0615976	1	No	0.999872	No
ENSG00000166797	FAM96A	PTV	0.0616004		0.0616004	1	No	0.999872	No
ENSG00000132170	PPARG	MPC>2	0.061601		0.061601	1	No	0.999872	No
ENSG00000131864	USP29	PTV	0.0617586		0.0617586	1	No	0.999872	No
ENSG00000205659	LIN52	PTV	0.0617885		0.0617885	1	No	0.999872	No
ENSG00000129991	TNNI3	PTV+MPC>2	0.061912		0.061912	1	No	0.999872	No
ENSG00000160183	TMPRSS3	PTV	0.0620082		0.0620082	1	No	0.999872	No
ENSG00000151176	PLBD2	PTV	0.0620802		0.0620802	1	No	0.999872	No
ENSG00000075539	FRYL	PTV+MPC>2	0.0620916		0.0620916	1	No	0.999872	No
ENSG00000189127	ANKRD34B	PTV	0.0621511		0.0621511	1	No	0.999872	No
ENSG00000189139	FSCB	PTV	0.0623391		0.0623391	1	No	0.999872	No
ENSG00000100055	CYTH4	PTV	0.0623606		0.0623606	1	No	0.999872	No
ENSG00000212710	CTAGE1	PTV	0.0625719		0.0625719	1	No	0.999872	No
ENSG00000168274	HIST1H2AE	PTV+MPC>2	0.0626047		0.0626047	1	No	0.999872	No
ENSG00000182352	C17orf77	PTV	0.0626623		0.0626623	1	No	0.999872	No
ENSG00000143437	ARNT	PTV	0.0628986		0.0628986	1	No	0.999872	No
ENSG00000240857	RDH14	PTV	0.0629048		0.0629048	1	No	0.999872	No
ENSG00000095110	NXPE1	PTV	0.0629405		0.0629405	1	No	0.999872	No
ENSG00000102054	RBBP7	PTV+MPC>2	0.0629576	1	0.0629576	1	No	0.999872	No
ENSG00000137860	SLC28A2	PTV	0.0629682		0.0629682	1	No	0.999872	No
ENSG00000166816	LDHD	PTV	0.0630688		0.0630688	1	No	0.999872	No
ENSG00000131459	GFPT2	PTV	0.0630706		0.0630706	1	No	0.999872	No
ENSG00000101400	SNTA1	PTV	0.06321		0.06321	1	No	0.999872	No
ENSG00000146966	DENND2A	PTV	0.0634711		0.0634711	1	No	0.999872	No
ENSG00000253797	UTP14C	PTV	0.0635706		0.0635706	1	No	0.999872	No
ENSG00000070814	TCOF1	PTV	0.0636062		0.0636062	1	No	0.999872	No
ENSG00000072195	SPEG	PTV	0.0636872		0.0636872	1	No	0.999872	No
ENSG00000077684	JADE1	PTV+MPC>2	0.0637127		0.0637127	1	No	0.999872	No
ENSG00000163930	BAP1	PTV+MPC>3	0.0637145		0.0637145	1	No	0.999872	No
ENSG00000188039	NWD1	PTV	0.0637988		0.0637988	1	No	0.999872	No
ENSG00000163558	PRKCI	PTV+MPC>2	0.063818		0.063818	1	No	0.999872	No
ENSG00000144015	TRIM43	MPC>2	0.0641539		0.0641539	1	No	0.999872	No
ENSG00000069399	BCL3	PTV+MPC>2	0.0641829		0.0641829	1	No	0.999872	No
ENSG00000185958	FAM186A	PTV	0.0642092		0.0642092	1	No	0.999872	No
ENSG00000165118	C9orf64	PTV	0.0642242		0.0642242	1	No	0.999872	No
ENSG00000180628	PCGF5	PTV+MPC>2	0.0642476		0.0642476	1	No	0.999872	No
ENSG00000205581	HMGN1	PTV	0.0643161		0.0643161	1	No	0.999872	No
ENSG00000085721	RRN3	PTV	0.0644281		0.0644281	1	No	0.999872	No
ENSG00000135702	CHST5	PTV	0.0645074		0.0645074	1	No	0.999872	No
ENSG00000131969	ABHD12B	PTV	0.0647689		0.0647689	1	No	0.999872	No
ENSG00000169991	IFFO2	PTV+MPC>2	0.0648501		0.0648501	1	No	0.999872	No
ENSG00000114125	RNF7	PTV+MPC>2	0.0648857		0.0648857	1	No	0.999872	No
ENSG00000188659	FAM154B	PTV	0.0649404		0.0649404	1	No	0.999872	No
ENSG00000117472	TSPAN1	PTV	0.0649525		0.0649525	1	No	0.999872	No
ENSG00000181374	CCL13	PTV	0.0650888		0.0650888	1	No	0.999872	No
ENSG00000130193	THEM6	PTV+MPC>2	0.0651552		0.0651552	1	No	0.999872	No
ENSG00000134594	RAB33A	PTV+MPC>2	0.0652445	1	0.0652445	1	No	0.999872	No
ENSG00000130294	KIF1A	PTV	0.0652506		0.0652506	1	No	0.999872	No
ENSG00000241553	ARPC4	PTV+MPC>2	0.0653186		0.0653186	1	No	0.999872	No
ENSG00000117640	MTFR1L	PTV	0.0653576		0.0653576	1	No	0.999872	No
ENSG00000136110	LECT1	PTV	0.0654246		0.0654246	1	No	0.999872	No
ENSG00000112531	QKI	MPC>2	0.0654321		0.0654321	1	No	0.999872	No
ENSG00000269190	FBXO17	PTV	0.065448		0.065448	1	No	0.999872	No
ENSG00000197536	C5orf56	PTV	0.0655012		0.0655012	1	No	0.999872	No
ENSG00000250254	PTTG2	PTV	0.0655165		0.0655165	1	No	0.999872	No
ENSG00000164362	TERT	PTV+MPC>2	0.0655181		0.0655181	1	No	0.999872	No
ENSG00000173692	PSMD1	PTV+MPC>2	0.0656716		0.0656716	1	No	0.999872	No
ENSG00000076864	RAP1GAP	MPC>2	0.0659379		0.0659379	1	No	0.999872	No
ENSG00000148143	ZNF462	MPC>2	0.0660095		0.0660095	1	No	0.999872	No
ENSG00000114948	ADAM23	PTV	0.0660513		0.0660513	1	No	0.999872	No
ENSG00000116685	KIAA2013	PTV	0.0660725		0.0660725	1	No	0.999872	No
ENSG00000079387	SENP1	PTV+MPC>2	0.0661468		0.0661468	1	No	0.999872	No
ENSG00000127824	TUBA4A	PTV	0.0661719		0.0661719	1	No	0.999872	No
ENSG00000243943	ZNF512	PTV	0.0661828		0.0661828	1	No	0.999872	No
ENSG00000084676	NCOA1	PTV	0.0662349		0.0662349	1	No	0.999872	No
ENSG00000214338	SOGA3	PTV	0.0663304		0.0663304	1	No	0.999872	No
ENSG00000137825	ITPKA	PTV	0.0663368		0.0663368	1	No	0.999872	No
ENSG00000172073	TEX37	PTV	0.0664682		0.0664682	1	No	0.999872	No
ENSG00000136715	SAP130	MPC>2	0.066494		0.066494	1	No	0.999872	No
ENSG00000127838	PNKD	PTV	0.0665405		0.0665405	1	No	0.999872	No
ENSG00000134376	CRB1	PTV	0.0665592		0.0665592	1	No	0.999872	No
ENSG00000257017	HP	PTV	0.066784		0.066784	1	No	0.999872	No
ENSG00000114744	COMMD2	PTV	0.0668712		0.0668712	1	No	0.999872	No
ENSG00000203896	LIME1	PTV	0.0670259		0.0670259	1	No	0.999872	No
ENSG00000185697	MYBL1	MPC>2	0.0670269		0.0670269	1	No	0.999872	No
ENSG00000176979	TRIM60	PTV	0.0670602		0.0670602	1	No	0.999872	No
ENSG00000163002	NUP35	PTV	0.0672351		0.0672351	1	No	0.999872	No
ENSG00000175221	MED16	PTV	0.0673753		0.0673753	1	No	0.999872	No
ENSG00000197870	PRB3	PTV	0.067562		0.067562	1	No	0.999872	No
ENSG00000146054	TRIM7	PTV	0.0676183		0.0676183	1	No	0.999872	No
ENSG00000244165	P2RY11	PTV	0.0677903		0.0677903	1	No	0.999872	No
ENSG00000148468	FAM171A1	PTV	0.0677969		0.0677969	1	No	0.999872	No
ENSG00000116922	C1orf109	PTV	0.0678243		0.0678243	1	No	0.999872	No
ENSG00000143627	PKLR	PTV	0.0678444		0.0678444	1	No	0.999872	No
ENSG00000178904	DPY19L3	PTV	0.0678821		0.0678821	1	No	0.999872	No
ENSG00000157927	RADIL	PTV	0.0679435		0.0679435	1	No	0.999872	No
ENSG00000182621	PLCB1	MPC>2	0.0683441		0.0683441	1	No	0.999872	No
ENSG00000173894	CBX2	PTV	0.0683629		0.0683629	1	No	0.999872	No
ENSG00000105281	SLC1A5	PTV+MPC>2	0.0685466		0.0685466	1	No	0.999872	No
ENSG00000005238	FAM214B	PTV	0.068591		0.068591	1	No	0.999872	No
ENSG00000166794	PPIB	PTV	0.0687897		0.0687897	1	No	0.999872	No
ENSG00000185010	F8	PTV	0.0688733	1	0.0688733	1	No	0.999872	No
ENSG00000079332	SAR1A	PTV	0.0689114		0.0689114	1	No	0.999872	No
ENSG00000070540	WIPI1	PTV	0.0689431		0.0689431	1	No	0.999872	No
ENSG00000137575	SDCBP	PTV	0.0689469		0.0689469	1	No	0.999872	No
ENSG00000142619	PADI3	PTV	0.0689611		0.0689611	1	No	0.999872	No
ENSG00000138107	ACTR1A	PTV	0.0691354		0.0691354	1	No	0.999872	No
ENSG00000215790	SLC35E2	PTV+MPC>3	0.069173		0.069173	1	No	0.999872	No
ENSG00000170866	LILRA3	PTV	0.0692278		0.0692278	1	No	0.999872	No
ENSG00000149476	DAK	PTV	0.069318		0.069318	1	No	0.999872	No
ENSG00000065559	MAP2K4	MPC>2	0.0693881		0.0693881	1	No	0.999872	No
ENSG00000169908	TM4SF1	PTV	0.0694748		0.0694748	1	No	0.999872	No
ENSG00000139428	MMAB	PTV	0.0694847		0.0694847	1	No	0.999872	No
ENSG00000155011	DKK2	PTV	0.0694955		0.0694955	1	No	0.999872	No
ENSG00000175514	GPR152	PTV	0.0695318		0.0695318	1	No	0.999872	No
ENSG00000177599	ZNF491	PTV	0.069532		0.069532	1	No	0.999872	No
ENSG00000113070	HBEGF	PTV+MPC>2	0.069584		0.069584	1	No	0.999872	No
ENSG00000159788	RGS12	PTV	0.0696349		0.0696349	1	No	0.999872	No
ENSG00000102145	GATA1	MPC>2	0.0697932	1	0.0697932	1	No	0.999872	No
ENSG00000017483	SLC38A5	PTV+MPC>2	0.0698533	1	0.0698533	1	No	0.999872	No
ENSG00000146856	AGBL3	PTV	0.0699792		0.0699792	1	No	0.999872	No
ENSG00000147402	GABRQ	PTV	0.0700706	1	0.0700706	1	No	0.999872	No
ENSG00000182325	FBXL6	PTV	0.070418		0.070418	1	No	0.999872	No
ENSG00000160789	LMNA	PTV	0.0704302		0.0704302	1	No	0.999872	No
ENSG00000221866	PLXNA4	PTV+MPC>2	0.0704354		0.0704354	1	No	0.999872	No
ENSG00000039319	ZFYVE16	PTV	0.0704491		0.0704491	1	No	0.999872	No
ENSG00000164508	HIST1H2AA	PTV	0.070453		0.070453	1	No	0.999872	No
ENSG00000155974	GRIP1	PTV	0.0704774		0.0704774	1	No	0.999872	No
ENSG00000136935	GOLGA1	PTV	0.0705352		0.0705352	1	No	0.999872	No
ENSG00000242247	ARFGAP3	PTV	0.0705398		0.0705398	1	No	0.999872	No
ENSG00000164076	CAMKV	MPC>2	0.0706563		0.0706563	1	No	0.999872	No
ENSG00000132130	LHX1	PTV+MPC>2	0.0707939		0.0707939	1	No	0.999872	No
ENSG00000171136	RLN3	PTV	0.0709008		0.0709008	1	No	0.999872	No
ENSG00000054611	TBC1D22A	PTV	0.0709129		0.0709129	1	No	0.999872	No
ENSG00000126583	PRKCG	PTV+MPC>3	0.071119		0.071119	1	No	0.999872	No
ENSG00000235376	RPEL1	PTV	0.0711718		0.0711718	1	No	0.999872	No
ENSG00000163394	CCKAR	PTV	0.0712307		0.0712307	1	No	0.999872	No
ENSG00000135655	USP15	PTV+MPC>2	0.0713373		0.0713373	1	No	0.999872	No
ENSG00000148408	CACNA1B	PTV+MPC>3	0.0713419		0.0713419	1	No	0.999872	No
ENSG00000144285	SCN1A	PTV+MPC>2	0.0713541		0.0713541	1	No	0.999872	No
ENSG00000139219	COL2A1	MPC>2	0.0714097		0.0714097	1	No	0.999872	No
ENSG00000142621	FHAD1	PTV	0.0716132		0.0716132	1	No	0.999872	No
ENSG00000152484	USP12	PTV	0.0717071		0.0717071	1	No	0.999872	No
ENSG00000179941	BBS10	PTV	0.0717352		0.0717352	1	No	0.999872	No
ENSG00000122970	IFT81	PTV	0.0717925		0.0717925	1	No	0.999872	No
ENSG00000106628	POLD2	PTV	0.0718598		0.0718598	1	No	0.999872	No
ENSG00000029639	TFB1M	PTV	0.0718829		0.0718829	1	No	0.999872	No
ENSG00000221909	FAM200A	PTV	0.0721305		0.0721305	1	No	0.999872	No
ENSG00000170128	GPR25	PTV+MPC>2	0.0722655		0.0722655	1	No	0.999872	No
ENSG00000161681	SHANK1	PTV+MPC>2	0.0723081		0.0723081	1	No	0.999872	No
ENSG00000205339	IPO7	PTV+MPC>2	0.072336		0.072336	1	No	0.999872	No
ENSG00000169733	RFNG	PTV	0.0725465		0.0725465	1	No	0.999872	No
ENSG00000169933	FRMPD4	PTV+MPC>2	0.0726367	1	0.0726367	1	No	0.999872	No
ENSG00000143156	NME7	PTV	0.0727222		0.0727222	1	No	0.999872	No
ENSG00000120949	TNFRSF8	PTV	0.0727336		0.0727336	1	No	0.999872	No
ENSG00000077935	SMC1B	PTV	0.0727387		0.0727387	1	No	0.999872	No
ENSG00000167680	SEMA6B	PTV+MPC>2	0.0727983		0.0727983	1	No	0.999872	No
ENSG00000159210	SNF8	PTV	0.0728686		0.0728686	1	No	0.999872	No
ENSG00000069431	ABCC9	PTV	0.0728798		0.0728798	1	No	0.999872	No
ENSG00000134243	SORT1	PTV	0.0729074		0.0729074	1	No	0.999872	No
ENSG00000124615	MOCS1	PTV	0.0729745		0.0729745	1	No	0.999872	No
ENSG00000119655	NPC2	PTV	0.0730051		0.0730051	1	No	0.999872	No
ENSG00000170677	SOCS6	PTV	0.0730704		0.0730704	1	No	0.999872	No
ENSG00000109906	ZBTB16	PTV+MPC>2	0.0731398		0.0731398	1	No	0.999872	No
ENSG00000147885	IFNA16	PTV	0.0733909		0.0733909	1	No	0.999872	No
ENSG00000102978	POLR2C	PTV	0.0734187		0.0734187	1	No	0.999872	No
ENSG00000135829	DHX9	PTV	0.0734594		0.0734594	1	No	0.999872	No
ENSG00000148834	GSTO1	PTV	0.0734997		0.0734997	1	No	0.999872	No
ENSG00000153823	PID1	PTV	0.0735794		0.0735794	1	No	0.999872	No
ENSG00000062725	APPBP2	PTV	0.0736291		0.0736291	1	No	0.999872	No
ENSG00000162511	LAPTM5	PTV	0.0736854		0.0736854	1	No	0.999872	No
ENSG00000136842	TMOD1	PTV	0.0737348		0.0737348	1	No	0.999872	No
ENSG00000080007	DDX43	PTV	0.0737922		0.0737922	1	No	0.999872	No
ENSG00000141696	LEPREL4	PTV+MPC>2	0.073835		0.073835	1	No	0.999872	No
ENSG00000106829	TLE4	PTV	0.07403		0.07403	1	No	0.999872	No
ENSG00000138041	SMEK2	MPC>2	0.07403		0.07403	1	No	0.999872	No
ENSG00000162601	MYSM1	MPC>2	0.0740334		0.0740334	1	No	0.999872	No
ENSG00000197961	ZNF121	PTV	0.0740517		0.0740517	1	No	0.999872	No
ENSG00000153266	FEZF2	MPC>2	0.0742462		0.0742462	1	No	0.999872	No
ENSG00000176136	MC5R	PTV	0.0742964		0.0742964	1	No	0.999872	No
ENSG00000187017	ESPN	PTV	0.0743553		0.0743553	1	No	0.999872	No
ENSG00000099194	SCD	PTV+MPC>2	0.0743588		0.0743588	1	No	0.999872	No
ENSG00000169884	WNT10B	PTV	0.0746651		0.0746651	1	No	0.999872	No
ENSG00000117614	SYF2	PTV	0.0746665		0.0746665	1	No	0.999872	No
ENSG00000142192	APP	PTV	0.074709		0.074709	1	No	0.999872	No
ENSG00000198276	UCKL1	PTV+MPC>2	0.074757		0.074757	1	No	0.999872	No
ENSG00000146376	ARHGAP18	PTV	0.0747794		0.0747794	1	No	0.999872	No
ENSG00000187773	FAM69C	PTV	0.0747924		0.0747924	1	No	0.999872	No
ENSG00000134278	SPIRE1	PTV	0.0747931		0.0747931	1	No	0.999872	No
ENSG00000135750	KCNK1	PTV	0.0748542		0.0748542	1	No	0.999872	No
ENSG00000113520	IL4	PTV	0.0749461		0.0749461	1	No	0.999872	No
ENSG00000153815	CMIP	MPC>2	0.0749461		0.0749461	1	No	0.999872	No
ENSG00000100478	AP4S1	PTV	0.0749847		0.0749847	1	No	0.999872	No
ENSG00000154359	LONRF1	PTV+MPC>2	0.0749918		0.0749918	1	No	0.999872	No
ENSG00000137414	FAM8A1	PTV	0.0750305		0.0750305	1	No	0.999872	No
ENSG00000119844	AFTPH	PTV	0.0750387		0.0750387	1	No	0.999872	No
ENSG00000037241	RPL26L1	PTV	0.0750511		0.0750511	1	No	0.999872	No
ENSG00000130706	ADRM1	MPC>2	0.0751772		0.0751772	1	No	0.999872	No
ENSG00000128242	GAL3ST1	PTV+MPC>2	0.0751953		0.0751953	1	No	0.999872	No
ENSG00000108582	CPD	MPC>2	0.0752556		0.0752556	1	No	0.999872	No
ENSG00000112379	KIAA1244	PTV	0.0752723		0.0752723	1	No	0.999872	No
ENSG00000115446	UNC50	PTV	0.0753824		0.0753824	1	No	0.999872	No
ENSG00000165282	PIGO	PTV	0.0753859		0.0753859	1	No	0.999872	No
ENSG00000156206	C15orf26	PTV	0.0754509		0.0754509	1	No	0.999872	No
ENSG00000122482	ZNF644	PTV	0.0754982		0.0754982	1	No	0.999872	No
ENSG00000126804	ZBTB1	PTV	0.0755105		0.0755105	1	No	0.999872	No
ENSG00000101665	SMAD7	PTV	0.0755739		0.0755739	1	No	0.999872	No
ENSG00000184983	NDUFA6	PTV	0.0756289		0.0756289	1	No	0.999872	No
ENSG00000070047	PHRF1	PTV	0.0757281		0.0757281	1	No	0.999872	No
ENSG00000075188	NUP37	PTV	0.0757732		0.0757732	1	No	0.999872	No
ENSG00000124469	CEACAM8	PTV	0.0757865		0.0757865	1	No	0.999872	No
ENSG00000103264	FBXO31	MPC>2	0.0757956		0.0757956	1	No	0.999872	No
ENSG00000186352	ANKRD37	PTV	0.0758536		0.0758536	1	No	0.999872	No
ENSG00000197165	SULT1A2	PTV	0.0759995		0.0759995	1	No	0.999872	No
ENSG00000141371	C17orf64	PTV	0.0761323		0.0761323	1	No	0.999872	No
ENSG00000128713	HOXD11	PTV	0.0761376		0.0761376	1	No	0.999872	No
ENSG00000143303	RRNAD1	PTV	0.0764553		0.0764553	1	No	0.999872	No
ENSG00000134020	PEBP4	PTV	0.0765814		0.0765814	1	No	0.999872	No
ENSG00000173848	NET1	PTV	0.0766427		0.0766427	1	No	0.999872	No
ENSG00000156136	DCK	PTV	0.0766567		0.0766567	1	No	0.999872	No
ENSG00000083828	ZNF586	PTV	0.0767072		0.0767072	1	No	0.999872	No
ENSG00000186971	KRTAP13-4	PTV	0.0768958		0.0768958	1	No	0.999872	No
ENSG00000180549	FUT7	PTV	0.0769793		0.0769793	1	No	0.999872	No
ENSG00000143369	ECM1	PTV	0.0770223		0.0770223	1	No	0.999872	No
ENSG00000139572	GPR84	PTV	0.077225		0.077225	1	No	0.999872	No
ENSG00000115415	STAT1	MPC>2	0.0772543		0.0772543	1	No	0.999872	No
ENSG00000116213	WRAP73	PTV	0.0773118		0.0773118	1	No	0.999872	No
ENSG00000112280	COL9A1	PTV	0.077328		0.077328	1	No	0.999872	No
ENSG00000172819	RARG	PTV+MPC>2	0.0774455		0.0774455	1	No	0.999872	No
ENSG00000065150	IPO5	MPC>2	0.0775171		0.0775171	1	No	0.999872	No
ENSG00000185219	ZNF445	PTV	0.0775804		0.0775804	1	No	0.999872	No
ENSG00000164631	ZNF12	MPC>2	0.0776061		0.0776061	1	No	0.999872	No
ENSG00000163818	LZTFL1	PTV	0.0776388		0.0776388	1	No	0.999872	No
ENSG00000163645	FAM194A	PTV	0.0776772		0.0776772	1	No	0.999872	No
ENSG00000196275	GTF2IRD2	PTV	0.0777006		0.0777006	1	No	0.999872	No
ENSG00000174576	NPAS4	PTV+MPC>3	0.0777137		0.0777137	1	No	0.999872	No
ENSG00000168003	SLC3A2	PTV	0.0777731		0.0777731	1	No	0.999872	No
ENSG00000242252	BGLAP	PTV	0.0778424		0.0778424	1	No	0.999872	No
ENSG00000140948	ZCCHC14	PTV	0.0778426		0.0778426	1	No	0.999872	No
ENSG00000170775	GPR37	PTV	0.0778618		0.0778618	1	No	0.999872	No
ENSG00000180245	RRH	PTV	0.0778631		0.0778631	1	No	0.999872	No
ENSG00000154447	SH3RF1	PTV	0.0780612		0.0780612	1	No	0.999872	No
ENSG00000205212	CCDC144NL	PTV	0.07808		0.07808	1	No	0.999872	No
ENSG00000126777	KTN1	PTV	0.0781627		0.0781627	1	No	0.999872	No
ENSG00000077235	GTF3C1	PTV+MPC>2	0.0782031		0.0782031	1	No	0.999872	No
ENSG00000168237	GLYCTK	PTV	0.0782153		0.0782153	1	No	0.999872	No
ENSG00000101230	ISM1	PTV+MPC>2	0.0782288		0.0782288	1	No	0.999872	No
ENSG00000178997	EXD1	PTV	0.0783089		0.0783089	1	No	0.999872	No
ENSG00000025770	NCAPH2	PTV	0.0783411		0.0783411	1	No	0.999872	No
ENSG00000115053	NCL	MPC>2	0.0783734		0.0783734	1	No	0.999872	No
ENSG00000127831	VIL1	PTV	0.0784473		0.0784473	1	No	0.999872	No
ENSG00000164172	MOCS2	PTV	0.0785055		0.0785055	1	No	0.999872	No
ENSG00000040608	RTN4R	PTV	0.0785688		0.0785688	1	No	0.999872	No
ENSG00000112290	WASF1	PTV	0.0785701		0.0785701	1	No	0.999872	No
ENSG00000133661	SFTPD	PTV	0.0786045		0.0786045	1	No	0.999872	No
ENSG00000118197	DDX59	PTV	0.0786575		0.0786575	1	No	0.999872	No
ENSG00000104756	KCTD9	MPC>2	0.0787468		0.0787468	1	No	0.999872	No
ENSG00000113360	DROSHA	PTV+MPC>2	0.0787626		0.0787626	1	No	0.999872	No
ENSG00000163932	PRKCD	PTV+MPC>2	0.0788775		0.0788775	1	No	0.999872	No
ENSG00000171219	CDC42BPG	PTV+MPC>2	0.0789122		0.0789122	1	No	0.999872	No
ENSG00000133422	MORC2	PTV	0.0790004		0.0790004	1	No	0.999872	No
ENSG00000120563	LYZL1	PTV+MPC>3	0.0791241		0.0791241	1	No	0.999872	No
ENSG00000078304	PPP2R5C	MPC>2	0.0792724		0.0792724	1	No	0.999872	No
ENSG00000205084	TMEM231	MPC>2	0.0794049		0.0794049	1	No	0.999872	No
ENSG00000102057	KCND1	PTV+MPC>2	0.0794201	1	0.0794201	1	No	0.999872	No
ENSG00000186834	HEXIM1	PTV+MPC>2	0.0794203		0.0794203	1	No	0.999872	No
ENSG00000174948	GPR149	PTV	0.0795508		0.0795508	1	No	0.999872	No
ENSG00000148158	SNX30	PTV	0.0795724		0.0795724	1	No	0.999872	No
ENSG00000129422	MTUS1	PTV	0.0795996		0.0795996	1	No	0.999872	No
ENSG00000073614	KDM5A	PTV	0.0796427		0.0796427	1	No	0.999872	No
ENSG00000171763	SPATA5L1	PTV+MPC>2	0.0798787		0.0798787	1	No	0.999872	No
ENSG00000041357	PSMA4	PTV+MPC>2	0.0799457		0.0799457	1	No	0.999872	No
ENSG00000133863	TEX15	PTV	0.0800949		0.0800949	1	No	0.999872	No
ENSG00000166126	AMN	PTV	0.0801366		0.0801366	1	No	0.999872	No
ENSG00000073584	SMARCE1	PTV+MPC>2	0.0801608		0.0801608	1	No	0.999872	No
ENSG00000110330	BIRC2	PTV+MPC>3	0.0801651		0.0801651	1	No	0.999872	No
ENSG00000074755	ZZEF1	PTV	0.0802271		0.0802271	1	No	0.999872	No
ENSG00000136574	GATA4	MPC>2	0.0802416		0.0802416	1	No	0.999872	No
ENSG00000197446	CYP2F1	PTV	0.0802777		0.0802777	1	No	0.999872	No
ENSG00000143363	PRUNE	PTV	0.0803123		0.0803123	1	No	0.999872	No
ENSG00000173898	SPTBN2	PTV+MPC>2	0.080427		0.080427	1	No	0.999872	No
ENSG00000169862	CTNND2	PTV+MPC>2	0.0804909		0.0804909	1	No	0.999872	No
ENSG00000119574	ZBTB45	PTV+MPC>3	0.0806202		0.0806202	1	No	0.999872	No
ENSG00000132485	ZRANB2	PTV+MPC>2	0.0806995		0.0806995	1	No	0.999872	No
ENSG00000135503	ACVR1B	PTV+MPC>2	0.0807437		0.0807437	1	No	0.999872	No
ENSG00000118200	CAMSAP2	PTV	0.0807457		0.0807457	1	No	0.999872	No
ENSG00000139218	SCAF11	MPC>2	0.080966		0.080966	1	No	0.999872	No
ENSG00000163644	PPM1K	PTV	0.0809685		0.0809685	1	No	0.999872	No
ENSG00000170927	PKHD1	PTV	0.0810226		0.0810226	1	No	0.999872	No
ENSG00000135093	USP30	PTV	0.0810753		0.0810753	1	No	0.999872	No
ENSG00000130699	TAF4	PTV	0.0811425		0.0811425	1	No	0.999872	No
ENSG00000161011	SQSTM1	PTV	0.0811512		0.0811512	1	No	0.999872	No
ENSG00000196821	C6orf106	MPC>2	0.0811868		0.0811868	1	No	0.999872	No
ENSG00000073910	FRY	PTV	0.0811904		0.0811904	1	No	0.999872	No
ENSG00000166676	TVP23A	PTV	0.0812125		0.0812125	1	No	0.999872	No
ENSG00000174946	GPR171	PTV	0.08124		0.08124	1	No	0.999872	No
ENSG00000178338	ZNF354B	PTV	0.0812636		0.0812636	1	No	0.999872	No
ENSG00000132639	SNAP25	MPC>2	0.0813381		0.0813381	1	No	0.999872	No
ENSG00000177679	SRRM3	PTV	0.0814763		0.0814763	1	No	0.999872	No
ENSG00000132698	RAB25	PTV	0.0816872		0.0816872	1	No	0.999872	No
ENSG00000122386	ZNF205	MPC>2	0.081865		0.081865	1	No	0.999872	No
ENSG00000241360	PDXP	PTV+MPC>2	0.0820477		0.0820477	1	No	0.999872	No
ENSG00000135473	PAN2	PTV	0.0820826		0.0820826	1	No	0.999872	No
ENSG00000158106	RHPN1	PTV	0.0821537		0.0821537	1	No	0.999872	No
ENSG00000185272	RBM11	PTV	0.0822129		0.0822129	1	No	0.999872	No
ENSG00000198844	ARHGEF15	PTV+MPC>2	0.0822339		0.0822339	1	No	0.999872	No
ENSG00000156831	NSMCE2	PTV	0.0824472		0.0824472	1	No	0.999872	No
ENSG00000132952	USPL1	PTV	0.0825655		0.0825655	1	No	0.999872	No
ENSG00000115041	KCNIP3	PTV	0.082599		0.082599	1	No	0.999872	No
ENSG00000204634	TBC1D8	PTV	0.0827064		0.0827064	1	No	0.999872	No
ENSG00000152242	C18orf25	PTV	0.0828202		0.0828202	1	No	0.999872	No
ENSG00000170049	KCNAB3	PTV	0.0828501		0.0828501	1	No	0.999872	No
ENSG00000126500	FLRT1	PTV	0.0828941		0.0828941	1	No	0.999872	No
ENSG00000005700	IBTK	PTV	0.0829077		0.0829077	1	No	0.999872	No
ENSG00000165424	ZCCHC24	PTV+MPC>2	0.0832977		0.0832977	1	No	0.999872	No
ENSG00000130035	GALNT8	PTV	0.0833175		0.0833175	1	No	0.999872	No
ENSG00000084463	WBP11	PTV+MPC>2	0.0834788		0.0834788	1	No	0.999872	No
ENSG00000145016	KIAA0226	PTV	0.0836732		0.0836732	1	No	0.999872	No
ENSG00000124839	RAB17	PTV	0.0837274		0.0837274	1	No	0.999872	No
ENSG00000196091	MYBPC1	MPC>2	0.0839261		0.0839261	1	No	0.999872	No
ENSG00000133138	TBC1D8B	PTV	0.0839689	1	0.0839689	1	No	0.999872	No
ENSG00000140795	MYLK3	PTV	0.0839871		0.0839871	1	No	0.999872	No
ENSG00000187806	TMEM202	PTV	0.0840178		0.0840178	1	No	0.999872	No
ENSG00000141753	IGFBP4	PTV	0.0840349		0.0840349	1	No	0.999872	No
ENSG00000213822	CEACAM18	PTV	0.0840608		0.0840608	1	No	0.999872	No
ENSG00000128253	RFPL2	PTV	0.0841102		0.0841102	1	No	0.999872	No
ENSG00000153093	ACOXL	PTV	0.0841388		0.0841388	1	No	0.999872	No
ENSG00000080603	SRCAP	PTV	0.0841567		0.0841567	1	No	0.999872	No
ENSG00000227345	PARG	PTV	0.0842461		0.0842461	1	No	0.999872	No
ENSG00000170323	FABP4	PTV	0.0842779		0.0842779	1	No	0.999872	No
ENSG00000167972	ABCA3	PTV	0.0846858		0.0846858	1	No	0.999872	No
ENSG00000105852	PON3	PTV	0.0847008		0.0847008	1	No	0.999872	No
ENSG00000197437	OR13G1	PTV	0.0847753		0.0847753	1	No	0.999872	No
ENSG00000138670	RASGEF1B	PTV	0.0847834		0.0847834	1	No	0.999872	No
ENSG00000187792	ZNF70	PTV	0.0847969		0.0847969	1	No	0.999872	No
ENSG00000250120	PCDHA10	PTV	0.0848246		0.0848246	1	No	0.999872	No
ENSG00000102580	DNAJC3	PTV	0.0849404		0.0849404	1	No	0.999872	No
ENSG00000164187	LMBRD2	PTV	0.0849702		0.0849702	1	No	0.999872	No
ENSG00000147687	TATDN1	PTV	0.0849765		0.0849765	1	No	0.999872	No
ENSG00000177675	CD163L1	PTV	0.0851318		0.0851318	1	No	0.999872	No
ENSG00000182173	TSEN54	PTV	0.0852122		0.0852122	1	No	0.999872	No
ENSG00000141140	MYO19	PTV	0.0852151		0.0852151	1	No	0.999872	No
ENSG00000020256	ZFP64	PTV+MPC>2	0.0852366		0.0852366	1	No	0.999872	No
ENSG00000182890	GLUD2	PTV+MPC>2	0.0852394	1	0.0852394	1	No	0.999872	No
ENSG00000204371	EHMT2	MPC>2	0.0853194		0.0853194	1	No	0.999872	No
ENSG00000105221	AKT2	MPC>2	0.0854551		0.0854551	1	No	0.999872	No
ENSG00000016082	ISL1	PTV+MPC>2	0.0854883		0.0854883	1	No	0.999872	No
ENSG00000244588	RAD21L1	PTV	0.085508		0.085508	1	No	0.999872	No
ENSG00000113240	CLK4	PTV	0.0855281		0.0855281	1	No	0.999872	No
ENSG00000074964	ARHGEF10L	PTV	0.0857486		0.0857486	1	No	0.999872	No
ENSG00000125703	ATG4C	PTV	0.0858387		0.0858387	1	No	0.999872	No
ENSG00000113262	GRM6	PTV	0.0859184		0.0859184	1	No	0.999872	No
ENSG00000144668	ITGA9	PTV+MPC>2	0.0859247		0.0859247	1	No	0.999872	No
ENSG00000175229	GAL3ST3	PTV	0.0859359		0.0859359	1	No	0.999872	No
ENSG00000115548	KDM3A	MPC>2	0.0859522		0.0859522	1	No	0.999872	No
ENSG00000181409	AATK	PTV	0.0859782		0.0859782	1	No	0.999872	No
ENSG00000114656	KIAA1257	PTV	0.0859863		0.0859863	1	No	0.999872	No
ENSG00000051620	HEBP2	PTV	0.0859999		0.0859999	1	No	0.999872	No
ENSG00000103089	FA2H	PTV+MPC>2	0.0862105		0.0862105	1	No	0.999872	No
ENSG00000119938	PPP1R3C	PTV	0.0862239		0.0862239	1	No	0.999872	No
ENSG00000134186	PRPF38B	PTV+MPC>2	0.0862649		0.0862649	1	No	0.999872	No
ENSG00000109819	PPARGC1A	PTV	0.086309		0.086309	1	No	0.999872	No
ENSG00000107968	MAP3K8	PTV+MPC>2	0.0863097		0.0863097	1	No	0.999872	No
ENSG00000183978	COA3	PTV	0.0863509		0.0863509	1	No	0.999872	No
ENSG00000153406	NMRAL1	PTV	0.0864577		0.0864577	1	No	0.999872	No
ENSG00000054179	ENTPD2	PTV	0.0864963		0.0864963	1	No	0.999872	No
ENSG00000186340	THBS2	MPC>2	0.0864971		0.0864971	1	No	0.999872	No
ENSG00000198492	YTHDF2	PTV	0.086557		0.086557	1	No	0.999872	No
ENSG00000141255	SPATA22	PTV	0.0867095		0.0867095	1	No	0.999872	No
ENSG00000141485	SLC13A5	PTV	0.0867753		0.0867753	1	No	0.999872	No
ENSG00000181804	SLC9A9	PTV	0.0868644		0.0868644	1	No	0.999872	No
ENSG00000175077	RTP1	PTV	0.0868712		0.0868712	1	No	0.999872	No
ENSG00000132004	FBXW9	PTV	0.0869107		0.0869107	1	No	0.999872	No
ENSG00000132670	PTPRA	PTV	0.0869884		0.0869884	1	No	0.999872	No
ENSG00000139117	CPNE8	PTV	0.087182		0.087182	1	No	0.999872	No
ENSG00000186493	C5orf38	PTV	0.0872481		0.0872481	1	No	0.999872	No
ENSG00000067248	DHX29	PTV	0.0872886		0.0872886	1	No	0.999872	No
ENSG00000187514	PTMA	PTV	0.0874543		0.0874543	1	No	0.999872	No
ENSG00000144134	RABL2A	PTV+MPC>3	0.0875103		0.0875103	1	No	0.999872	No
ENSG00000134215	VAV3	PTV	0.0875592		0.0875592	1	No	0.999872	No
ENSG00000080503	SMARCA2	PTV+MPC>3	0.0875604		0.0875604	1	No	0.999872	No
ENSG00000166971	AKTIP	PTV	0.0876682		0.0876682	1	No	0.999872	No
ENSG00000163673	DCLK3	PTV	0.0877205		0.0877205	1	No	0.999872	No
ENSG00000154493	C10orf90	PTV	0.087816		0.087816	1	No	0.999872	No
ENSG00000148303	RPL7A	PTV	0.087898		0.087898	1	No	0.999872	No
ENSG00000166118	SPATA19	PTV	0.0879547		0.0879547	1	No	0.999872	No
ENSG00000136193	SCRN1	PTV	0.0880086		0.0880086	1	No	0.999872	No
ENSG00000168883	USP39	PTV	0.0880349		0.0880349	1	No	0.999872	No
ENSG00000151834	GABRA2	PTV	0.0881753		0.0881753	1	No	0.999872	No
ENSG00000130700	GATA5	PTV+MPC>2	0.0881797		0.0881797	1	No	0.999872	No
ENSG00000130876	SLC7A10	PTV	0.088222		0.088222	1	No	0.999872	No
ENSG00000143401	ANP32E	PTV	0.088255		0.088255	1	No	0.999872	No
ENSG00000010256	UQCRC1	PTV	0.0882687		0.0882687	1	No	0.999872	No
ENSG00000143793	C1orf35	MPC>2	0.0882826		0.0882826	1	No	0.999872	No
ENSG00000183310	OR2T34	PTV	0.0884086		0.0884086	1	No	0.999872	No
ENSG00000204531	POU5F1	PTV+MPC>2	0.0884181		0.0884181	1	No	0.999872	No
ENSG00000228278	ORM2	PTV+MPC>2	0.0886217		0.0886217	1	No	0.999872	No
ENSG00000113407	TARS	PTV	0.0887026		0.0887026	1	No	0.999872	No
ENSG00000166313	APBB1	PTV	0.088773		0.088773	1	No	0.999872	No
ENSG00000172732	MUS81	PTV+MPC>2	0.0888028		0.0888028	1	No	0.999872	No
ENSG00000181323	SPEM1	PTV	0.0889255		0.0889255	1	No	0.999872	No
ENSG00000197591	OR11L1	PTV	0.089025		0.089025	1	No	0.999872	No
ENSG00000161642	ZNF385A	PTV+MPC>2	0.0890569		0.0890569	1	No	0.999872	No
ENSG00000164946	FREM1	PTV	0.0891615		0.0891615	1	No	0.999872	No
ENSG00000050748	MAPK9	PTV+MPC>2	0.0891931		0.0891931	1	No	0.999872	No
ENSG00000033867	SLC4A7	PTV	0.0892128		0.0892128	1	No	0.999872	No
ENSG00000131791	PRKAB2	MPC>2	0.0892401		0.0892401	1	No	0.999872	No
ENSG00000185650	ZFP36L1	PTV	0.0892401		0.0892401	1	No	0.999872	No
ENSG00000164509	IL31RA	PTV	0.0892564		0.0892564	1	No	0.999872	No
ENSG00000180772	AGTR2	PTV	0.0892765	1	0.0892765	1	No	0.999872	No
ENSG00000042062	FAM65C	PTV	0.0893346		0.0893346	1	No	0.999872	No
ENSG00000127947	PTPN12	PTV	0.0893911		0.0893911	1	No	0.999872	No
ENSG00000182095	TNRC18	PTV+MPC>2	0.0894485		0.0894485	1	No	0.999872	No
ENSG00000151292	CSNK1G3	PTV	0.0894634		0.0894634	1	No	0.999872	No
ENSG00000197971	MBP	PTV	0.0895463		0.0895463	1	No	0.999872	No
ENSG00000136802	LRRC8A	PTV	0.0895574		0.0895574	1	No	0.999872	No
ENSG00000204965	PCDHA5	PTV	0.089679		0.089679	1	No	0.999872	No
ENSG00000205726	ITSN1	PTV+MPC>2	0.0897773		0.0897773	1	No	0.999872	No
ENSG00000147955	SIGMAR1	MPC>2	0.0897856		0.0897856	1	No	0.999872	No
ENSG00000168116	KIAA1586	PTV	0.0898856		0.0898856	1	No	0.999872	No
ENSG00000005448	WDR54	PTV	0.0898984		0.0898984	1	No	0.999872	No
ENSG00000113318	MSH3	PTV	0.0899159		0.0899159	1	No	0.999872	No
ENSG00000186480	INSIG1	PTV+MPC>2	0.0900294		0.0900294	1	No	0.999872	No
ENSG00000197746	PSAP	PTV	0.090047		0.090047	1	No	0.999872	No
ENSG00000108771	DHX58	PTV	0.0900677		0.0900677	1	No	0.999872	No
ENSG00000134709	HOOK1	PTV	0.0900726		0.0900726	1	No	0.999872	No
ENSG00000136250	AOAH	PTV	0.0902531		0.0902531	1	No	0.999872	No
ENSG00000132185	FCRLA	PTV	0.0902912		0.0902912	1	No	0.999872	No
ENSG00000013275	PSMC4	MPC>2	0.0903216		0.0903216	1	No	0.999872	No
ENSG00000178734	C13orf45	PTV	0.0904193		0.0904193	1	No	0.999872	No
ENSG00000090372	STRN4	PTV+MPC>2	0.0905818		0.0905818	1	No	0.999872	No
ENSG00000118965	WDR35	PTV	0.0906477		0.0906477	1	No	0.999872	No
ENSG00000131738	KRT33B	MPC>2	0.0906773		0.0906773	1	No	0.999872	No
ENSG00000182446	NPLOC4	MPC>2	0.0906893		0.0906893	1	No	0.999872	No
ENSG00000153233	PTPRR	PTV	0.0907002		0.0907002	1	No	0.999872	No
ENSG00000182557	SPNS3	PTV	0.0908864		0.0908864	1	No	0.999872	No
ENSG00000117090	SLAMF1	PTV	0.090909		0.090909	1	No	0.999872	No
ENSG00000187742	SECISBP2	PTV	0.0909163		0.0909163	1	No	0.999872	No
ENSG00000109079	TNFAIP1	PTV	0.0913695		0.0913695	1	No	0.999872	No
ENSG00000196156	KRTAP4-3	PTV	0.0914256		0.0914256	1	No	0.999872	No
ENSG00000117410	ATP6V0B	PTV	0.0915309		0.0915309	1	No	0.999872	No
ENSG00000071909	MYO3B	PTV	0.0916265		0.0916265	1	No	0.999872	No
ENSG00000140527	WDR93	PTV	0.0916525		0.0916525	1	No	0.999872	No
ENSG00000185033	SEMA4B	PTV	0.0916822		0.0916822	1	No	0.999872	No
ENSG00000143515	ATP8B2	PTV	0.091689		0.091689	1	No	0.999872	No
ENSG00000196914	ARHGEF12	PTV+MPC>2	0.091722		0.091722	1	No	0.999872	No
ENSG00000148429	USP6NL	PTV	0.0917376		0.0917376	1	No	0.999872	No
ENSG00000077264	PAK3	MPC>2	0.0917487	1	0.0917487	1	No	0.999872	No
ENSG00000127399	LRRC61	PTV	0.0918495		0.0918495	1	No	0.999872	No
ENSG00000182253	SYNM	PTV	0.0918733		0.0918733	1	No	0.999872	No
ENSG00000007384	RHBDF1	PTV+MPC>2	0.0918737		0.0918737	1	No	0.999872	No
ENSG00000174358	SLC6A19	PTV	0.0918777		0.0918777	1	No	0.999872	No
ENSG00000102870	ZNF629	MPC>2	0.092007		0.092007	1	No	0.999872	No
ENSG00000198128	OR2L3	PTV	0.092017		0.092017	1	No	0.999872	No
ENSG00000167112	TRUB2	PTV	0.092108		0.092108	1	No	0.999872	No
ENSG00000169223	LMAN2	PTV	0.0922422		0.0922422	1	No	0.999872	No
ENSG00000100764	PSMC1	PTV+MPC>3	0.0922586		0.0922586	1	No	0.999872	No
ENSG00000145632	PLK2	MPC>2	0.0923153		0.0923153	1	No	0.999872	No
ENSG00000165621	OXGR1	PTV	0.0924478		0.0924478	1	No	0.999872	No
ENSG00000198604	BAZ1A	PTV	0.0924698		0.0924698	1	No	0.999872	No
ENSG00000178307	TMEM11	PTV+MPC>2	0.0924923		0.0924923	1	No	0.999872	No
ENSG00000198551	ZNF627	PTV	0.0925596		0.0925596	1	No	0.999872	No
ENSG00000206535	LNP1	PTV	0.0927516		0.0927516	1	No	0.999872	No
ENSG00000189108	IL1RAPL2	PTV+MPC>2	0.0927519	1	0.0927519	1	No	0.999872	No
ENSG00000234829	IFNA17	PTV	0.0928203		0.0928203	1	No	0.999872	No
ENSG00000066135	KDM4A	PTV+MPC>3	0.0928947		0.0928947	1	No	0.999872	No
ENSG00000123213	NLN	PTV	0.0929665		0.0929665	1	No	0.999872	No
ENSG00000101331	CCM2L	MPC>2	0.0929761		0.0929761	1	No	0.999872	No
ENSG00000106588	PSMA2	PTV+MPC>2	0.0930028		0.0930028	1	No	0.999872	No
ENSG00000132603	NIP7	PTV	0.0930399		0.0930399	1	No	0.999872	No
ENSG00000116691	MIIP	PTV	0.0930471		0.0930471	1	No	0.999872	No
ENSG00000141499	WRAP53	PTV	0.0931469		0.0931469	1	No	0.999872	No
ENSG00000096433	ITPR3	MPC>2	0.0931616		0.0931616	1	No	0.999872	No
ENSG00000065485	PDIA5	PTV	0.0933508		0.0933508	1	No	0.999872	No
ENSG00000185274	WBSCR17	PTV+MPC>2	0.0934173		0.0934173	1	No	0.999872	No
ENSG00000174529	TMEM81	PTV	0.0934193		0.0934193	1	No	0.999872	No
ENSG00000099817	POLR2E	PTV	0.0934949		0.0934949	1	No	0.999872	No
ENSG00000108433	GOSR2	PTV	0.0935198		0.0935198	1	No	0.999872	No
ENSG00000106688	SLC1A1	PTV	0.0939782		0.0939782	1	No	0.999872	No
ENSG00000010072	SPRTN	PTV+MPC>2	0.0941278		0.0941278	1	No	0.999872	No
ENSG00000138744	NAAA	PTV+MPC>2	0.0942086		0.0942086	1	No	0.999872	No
ENSG00000101292	PROKR2	PTV	0.0943419		0.0943419	1	No	0.999872	No
ENSG00000162722	TRIM58	PTV	0.0944765		0.0944765	1	No	0.999872	No
ENSG00000130558	OLFM1	PTV	0.0946088		0.0946088	1	No	0.999872	No
ENSG00000136527	TRA2B	PTV	0.0946088		0.0946088	1	No	0.999872	No
ENSG00000068650	ATP11A	PTV	0.0946332		0.0946332	1	No	0.999872	No
ENSG00000170579	DLGAP1	PTV	0.0946587		0.0946587	1	No	0.999872	No
ENSG00000125503	PPP1R12C	PTV	0.0946812		0.0946812	1	No	0.999872	No
ENSG00000108242	CYP2C18	PTV	0.094757		0.094757	1	No	0.999872	No
ENSG00000104164	BLOC1S6	PTV	0.0949916		0.0949916	1	No	0.999872	No
ENSG00000176444	CLK2	PTV+MPC>2	0.0950068		0.0950068	1	No	0.999872	No
ENSG00000164944	KIAA1429	MPC>2	0.0951132		0.0951132	1	No	0.999872	No
ENSG00000182318	ZSCAN22	PTV	0.0951506		0.0951506	1	No	0.999872	No
ENSG00000160201	U2AF1	MPC>2	0.0952026		0.0952026	1	No	0.999872	No
ENSG00000080493	SLC4A4	PTV+MPC>2	0.0952637		0.0952637	1	No	0.999872	No
ENSG00000141736	ERBB2	PTV+MPC>3	0.0953113		0.0953113	1	No	0.999872	No
ENSG00000103591	AAGAB	PTV	0.0955787		0.0955787	1	No	0.999872	No
ENSG00000065600	TMEM206	PTV	0.0956079		0.0956079	1	No	0.999872	No
ENSG00000164303	ENPP6	PTV	0.0957154		0.0957154	1	No	0.999872	No
ENSG00000187871	GFRAL	PTV	0.0959651		0.0959651	1	No	0.999872	No
ENSG00000099901	RANBP1	PTV	0.0959907		0.0959907	1	No	0.999872	No
ENSG00000176476	CCDC101	MPC>2	0.0960611		0.0960611	1	No	0.999872	No
ENSG00000141367	CLTC	PTV+MPC>3	0.0961299		0.0961299	1	No	0.999872	No
ENSG00000166596	WDR16	PTV	0.0964453		0.0964453	1	No	0.999872	No
ENSG00000001617	SEMA3F	PTV	0.0964484		0.0964484	1	No	0.999872	No
ENSG00000101323	HAO1	PTV	0.0964486		0.0964486	1	No	0.999872	No
ENSG00000160862	AZGP1	PTV	0.0964664		0.0964664	1	No	0.999872	No
ENSG00000145819	ARHGAP26	PTV	0.0966868		0.0966868	1	No	0.999872	No
ENSG00000180370	PAK2	PTV+MPC>2	0.0967543		0.0967543	1	No	0.999872	No
ENSG00000115685	PPP1R7	PTV+MPC>2	0.096845		0.096845	1	No	0.999872	No
ENSG00000115568	ZNF142	PTV	0.0972631		0.0972631	1	No	0.999872	No
ENSG00000163453	IGFBP7	PTV	0.0972662		0.0972662	1	No	0.999872	No
ENSG00000171861	RNMTL1	PTV	0.0973681		0.0973681	1	No	0.999872	No
ENSG00000168010	ATG16L2	PTV+MPC>3	0.097377		0.097377	1	No	0.999872	No
ENSG00000180198	RCC1	PTV	0.0976032		0.0976032	1	No	0.999872	No
ENSG00000104884	ERCC2	PTV	0.0976423		0.0976423	1	No	0.999872	No
ENSG00000180287	PLD5	PTV+MPC>2	0.0976443		0.0976443	1	No	0.999872	No
ENSG00000136122	BORA	PTV	0.0976522		0.0976522	1	No	0.999872	No
ENSG00000166135	HIF1AN	MPC>2	0.0976825		0.0976825	1	No	0.999872	No
ENSG00000163590	PPM1L	PTV	0.0977765		0.0977765	1	No	0.999872	No
ENSG00000130203	APOE	PTV+MPC>2	0.0977982		0.0977982	1	No	0.999872	No
ENSG00000189091	SF3B3	PTV	0.0978203		0.0978203	1	No	0.999872	No
ENSG00000105889	STEAP1B	PTV	0.0980609		0.0980609	1	No	0.999872	No
ENSG00000124766	SOX4	PTV+MPC>2	0.0981804		0.0981804	1	No	0.999872	No
ENSG00000157219	HTR5A	PTV	0.0982503		0.0982503	1	No	0.999872	No
ENSG00000188778	ADRB3	PTV+MPC>2	0.0982608		0.0982608	1	No	0.999872	No
ENSG00000156467	UQCRB	PTV	0.0982887		0.0982887	1	No	0.999872	No
ENSG00000088538	DOCK3	PTV	0.0983769		0.0983769	1	No	0.999872	No
ENSG00000204217	BMPR2	PTV	0.0985655		0.0985655	1	No	0.999872	No
ENSG00000166801	FAM111A	PTV	0.0985778		0.0985778	1	No	0.999872	No
ENSG00000186716	BCR	PTV+MPC>3	0.0986353		0.0986353	1	No	0.999872	No
ENSG00000107736	CDH23	PTV	0.0987819		0.0987819	1	No	0.999872	No
ENSG00000086730	LAT2	PTV	0.0988101		0.0988101	1	No	0.999872	No
ENSG00000137872	SEMA6D	PTV	0.0989185		0.0989185	1	No	0.999872	No
ENSG00000271303	SRXN1	PTV	0.0990082		0.0990082	1	No	0.999872	No
ENSG00000136147	PHF11	PTV	0.0990526		0.0990526	1	No	0.999872	No
ENSG00000170949	ZNF160	PTV	0.0992247		0.0992247	1	No	0.999872	No
ENSG00000123700	KCNJ2	MPC>2	0.0993282		0.0993282	1	No	0.999872	No
ENSG00000173517	PEAK1	PTV	0.0993877		0.0993877	1	No	0.999872	No
ENSG00000113805	CNTN3	PTV	0.0993881		0.0993881	1	No	0.999872	No
ENSG00000181418	DDN	PTV	0.099413		0.099413	1	No	0.999872	No
ENSG00000166140	ZFYVE19	PTV	0.0994471		0.0994471	1	No	0.999872	No
ENSG00000133083	DCLK1	PTV	0.0996647		0.0996647	1	No	0.999872	No
ENSG00000153707	PTPRD	PTV	0.0997269		0.0997269	1	No	0.999872	No
ENSG00000176495	OR5AN1	PTV	0.0997275		0.0997275	1	No	0.999872	No
ENSG00000141560	FN3KRP	PTV	0.0997964		0.0997964	1	No	0.999872	No
ENSG00000196843	ARID5A	MPC>2	0.0998566		0.0998566	1	No	0.999872	No
ENSG00000168070	C11orf85	PTV	0.0998733		0.0998733	1	No	0.999872	No
ENSG00000182389	CACNB4	PTV	0.0999489		0.0999489	1	No	0.999872	No
ENSG00000107147	KCNT1	MPC>2	0.0999769		0.0999769	1	No	0.999872	No
ENSG00000171311	EXOSC1	PTV	0.100067		0.100067	1	No	0.999872	No
ENSG00000185926	OR4C46	PTV	0.100188		0.100188	1	No	0.999872	No
ENSG00000170681	MURC	PTV	0.100294		0.100294	1	No	0.999872	No
ENSG00000114902	SPCS1	PTV	0.100308		0.100308	1	No	0.999872	No
ENSG00000115183	TANC1	MPC>2	0.100374		0.100374	1	No	0.999872	No
ENSG00000133773	CCDC59	PTV	0.100417		0.100417	1	No	0.999872	No
ENSG00000157680	DGKI	PTV+MPC>2	0.100482		0.100482	1	No	0.999872	No
ENSG00000110768	GTF2H1	PTV	0.100486		0.100486	1	No	0.999872	No
ENSG00000180979	LRRC57	MPC>2	0.10094		0.10094	1	No	0.999872	No
ENSG00000107443	CCNJ	MPC>2	0.100987		0.100987	1	No	0.999872	No
ENSG00000132423	COQ3	PTV	0.101125		0.101125	1	No	0.999872	No
ENSG00000103342	GSPT1	PTV+MPC>2	0.101214		0.101214	1	No	0.999872	No
ENSG00000120278	PLEKHG1	PTV	0.10134		0.10134	1	No	0.999872	No
ENSG00000174282	ZBTB4	PTV	0.101354		0.101354	1	No	0.999872	No
ENSG00000141446	ESCO1	MPC>2	0.101383		0.101383	1	No	0.999872	No
ENSG00000138111	TMEM180	PTV	0.101542		0.101542	1	No	0.999872	No
ENSG00000078674	PCM1	PTV	0.101566		0.101566	1	No	0.999872	No
ENSG00000111325	OGFOD2	PTV	0.101676		0.101676	1	No	0.999872	No
ENSG00000085872	CHERP	PTV+MPC>3	0.101768		0.101768	1	No	0.999872	No
ENSG00000075407	ZNF37A	PTV	0.101773		0.101773	1	No	0.999872	No
ENSG00000143217	PVRL4	PTV	0.101918		0.101918	1	No	0.999872	No
ENSG00000118680	MYL12B	PTV	0.101947		0.101947	1	No	0.999872	No
ENSG00000070413	DGCR2	PTV	0.102		0.102	1	No	0.999872	No
ENSG00000165078	CPA6	PTV	0.102121		0.102121	1	No	0.999872	No
ENSG00000167325	RRM1	MPC>2	0.102131		0.102131	1	No	0.999872	No
ENSG00000128536	CDHR3	PTV	0.102252		0.102252	1	No	0.999872	No
ENSG00000198887	SMC5	PTV	0.102252		0.102252	1	No	0.999872	No
ENSG00000139220	PPFIA2	PTV	0.102252		0.102252	1	No	0.999872	No
ENSG00000151150	ANK3	PTV	0.102284		0.102284	1	No	0.999872	No
ENSG00000170782	OR10A4	PTV	0.102321		0.102321	1	No	0.999872	No
ENSG00000164488	DACT2	PTV	0.102355		0.102355	1	No	0.999872	No
ENSG00000032444	PNPLA6	PTV	0.102372		0.102372	1	No	0.999872	No
ENSG00000156011	PSD3	PTV	0.102461		0.102461	1	No	0.999872	No
ENSG00000070601	FRMPD1	PTV	0.1025		0.1025	1	No	0.999872	No
ENSG00000178694	NSUN3	PTV	0.102514		0.102514	1	No	0.999872	No
ENSG00000178502	KLHL11	PTV	0.102528		0.102528	1	No	0.999872	No
ENSG00000156253	RWDD2B	PTV	0.102607		0.102607	1	No	0.999872	No
ENSG00000101346	POFUT1	PTV	0.102629		0.102629	1	No	0.999872	No
ENSG00000167077	MEI1	PTV	0.102649		0.102649	1	No	0.999872	No
ENSG00000099849	RASSF7	PTV	0.10274		0.10274	1	No	0.999872	No
ENSG00000124780	KCNK17	PTV	0.102778		0.102778	1	No	0.999872	No
ENSG00000168491	CCDC110	PTV	0.102836		0.102836	1	No	0.999872	No
ENSG00000162434	JAK1	PTV+MPC>2	0.102879		0.102879	1	No	0.999872	No
ENSG00000134255	CEPT1	PTV+MPC>2	0.102882		0.102882	1	No	0.999872	No
ENSG00000103266	STUB1	PTV+MPC>2	0.102967		0.102967	1	No	0.999872	No
ENSG00000123575	FAM199X	PTV+MPC>2	0.103032	1	0.103032	1	No	0.999872	No
ENSG00000121454	LHX4	PTV	0.103099		0.103099	1	No	0.999872	No
ENSG00000119787	ATL2	PTV	0.103157		0.103157	1	No	0.999872	No
ENSG00000165280	VCP	MPC>2	0.103245		0.103245	1	No	0.999872	No
ENSG00000172640	OR10AD1	PTV	0.10335		0.10335	1	No	0.999872	No
ENSG00000177108	ZDHHC22	PTV	0.103447		0.103447	1	No	0.999872	No
ENSG00000164099	PRSS12	PTV	0.103511		0.103511	1	No	0.999872	No
ENSG00000143393	PI4KB	PTV	0.103542		0.103542	1	No	0.999872	No
ENSG00000076356	PLXNA2	MPC>2	0.103544		0.103544	1	No	0.999872	No
ENSG00000170515	PA2G4	PTV	0.1038		0.1038	1	No	0.999872	No
ENSG00000144357	UBR3	PTV+MPC>2	0.103816		0.103816	1	No	0.999872	No
ENSG00000110497	AMBRA1	PTV	0.103863		0.103863	1	No	0.999872	No
ENSG00000143157	POGK	PTV+MPC>2	0.103957		0.103957	1	No	0.999872	No
ENSG00000145996	CDKAL1	PTV	0.104023		0.104023	1	No	0.999872	No
ENSG00000135931	ARMC9	PTV	0.104131		0.104131	1	No	0.999872	No
ENSG00000178104	PDE4DIP	PTV	0.104147		0.104147	1	No	0.999872	No
ENSG00000106603	COA1	PTV	0.104193		0.104193	1	No	0.999872	No
ENSG00000101938	CHRDL1	PTV	0.104238	1	0.104238	1	No	0.999872	No
ENSG00000125414	MYH2	PTV	0.104278		0.104278	1	No	0.999872	No
ENSG00000163349	HIPK1	PTV+MPC>2	0.104344		0.104344	1	No	0.999872	No
ENSG00000104365	IKBKB	MPC>2	0.104556		0.104556	1	No	0.999872	No
ENSG00000196329	GIMAP5	PTV	0.104582		0.104582	1	No	0.999872	No
ENSG00000177465	ACOT4	PTV	0.104669		0.104669	1	No	0.999872	No
ENSG00000197816	CCDC180	PTV	0.104693		0.104693	1	No	0.999872	No
ENSG00000140090	SLC24A4	PTV	0.10481		0.10481	1	No	0.999872	No
ENSG00000168875	SOX14	PTV	0.104882		0.104882	1	No	0.999872	No
ENSG00000182909	LENG9	PTV	0.104963		0.104963	1	No	0.999872	No
ENSG00000169213	RAB3B	PTV	0.105079		0.105079	1	No	0.999872	No
ENSG00000167984	NLRC3	PTV	0.105104		0.105104	1	No	0.999872	No
ENSG00000115155	OTOF	PTV	0.105187		0.105187	1	No	0.999872	No
ENSG00000106330	MOSPD3	PTV	0.105502		0.105502	1	No	0.999872	No
ENSG00000165434	PGM2L1	PTV	0.105517		0.105517	1	No	0.999872	No
ENSG00000090857	PDPR	MPC>2	0.105584		0.105584	1	No	0.999872	No
ENSG00000174996	KLC2	PTV	0.105737		0.105737	1	No	0.999872	No
ENSG00000214360	EFCAB9	PTV	0.10585		0.10585	1	No	0.999872	No
ENSG00000239282	GATSL3	PTV	0.105908		0.105908	1	No	0.999872	No
ENSG00000156510	HKDC1	PTV	0.106093		0.106093	1	No	0.999872	No
ENSG00000071967	CYBRD1	PTV	0.106152		0.106152	1	No	0.999872	No
ENSG00000010803	SCMH1	PTV+MPC>2	0.106376		0.106376	1	No	0.999872	No
ENSG00000100387	RBX1	MPC>2	0.106409		0.106409	1	No	0.999872	No
ENSG00000166401	SERPINB8	PTV	0.106644		0.106644	1	No	0.999872	No
ENSG00000049323	LTBP1	PTV	0.106681		0.106681	1	No	0.999872	No
ENSG00000117139	KDM5B	PTV	0.106704		0.106704	1	No	0.999872	No
ENSG00000144535	DIS3L2	PTV	0.106816		0.106816	1	No	0.999872	No
ENSG00000204592	HLA-E	PTV+MPC>3	0.106821		0.106821	1	No	0.999872	No
ENSG00000257093	KIAA1147	PTV	0.106829		0.106829	1	No	0.999872	No
ENSG00000258713	C20orf141	PTV	0.106882		0.106882	1	No	0.999872	No
ENSG00000115268	RPS15	PTV+MPC>3	0.107094		0.107094	1	No	0.999872	No
ENSG00000184698	OR51M1	PTV	0.107109		0.107109	1	No	0.999872	No
ENSG00000173175	ADCY5	PTV	0.107162		0.107162	1	No	0.999872	No
ENSG00000198400	NTRK1	PTV	0.107344		0.107344	1	No	0.999872	No
ENSG00000160551	TAOK1	PTV	0.107376		0.107376	1	No	0.999872	No
ENSG00000117020	AKT3	MPC>2	0.10744		0.10744	1	No	0.999872	No
ENSG00000033100	CHPF2	PTV	0.107477		0.107477	1	No	0.999872	No
ENSG00000072080	SPP2	PTV	0.107498		0.107498	1	No	0.999872	No
ENSG00000125447	GGA3	PTV	0.107513		0.107513	1	No	0.999872	No
ENSG00000204394	VARS	PTV	0.107627		0.107627	1	No	0.999872	No
ENSG00000024526	DEPDC1	PTV	0.107696		0.107696	1	No	0.999872	No
ENSG00000171320	ESCO2	PTV	0.107844		0.107844	1	No	0.999872	No
ENSG00000051523	CYBA	PTV	0.107905		0.107905	1	No	0.999872	No
ENSG00000153922	CHD1	PTV+MPC>2	0.108069		0.108069	1	No	0.999872	No
ENSG00000233822	HIST1H2BN	MPC>2	0.10807		0.10807	1	No	0.999872	No
ENSG00000170631	ZNF16	PTV	0.108098		0.108098	1	No	0.999872	No
ENSG00000182162	P2RY8	PTV	0.108186		0.108186	1	No	0.999872	No
ENSG00000158258	CLSTN2	PTV	0.108236		0.108236	1	No	0.999872	No
ENSG00000100346	CACNA1I	PTV+MPC>2	0.108435		0.108435	1	No	0.999872	No
ENSG00000081913	PHLPP1	PTV	0.108445		0.108445	1	No	0.999872	No
ENSG00000182179	UBA7	PTV	0.108492		0.108492	1	No	0.999872	No
ENSG00000134028	ADAMDEC1	PTV	0.108641		0.108641	1	No	0.999872	No
ENSG00000198033	TUBA3C	PTV	0.108753		0.108753	1	No	0.999872	No
ENSG00000203734	ECT2L	PTV	0.108774		0.108774	1	No	0.999872	No
ENSG00000105677	TMEM147	PTV	0.108811		0.108811	1	No	0.999872	No
ENSG00000099377	HSD3B7	PTV	0.108914		0.108914	1	No	0.999872	No
ENSG00000111358	GTF2H3	PTV	0.10903		0.10903	1	No	0.999872	No
ENSG00000112576	CCND3	PTV+MPC>2	0.109038		0.109038	1	No	0.999872	No
ENSG00000132694	ARHGEF11	PTV	0.109125		0.109125	1	No	0.999872	No
ENSG00000221983	UBA52	PTV+MPC>2	0.10927		0.10927	1	No	0.999872	No
ENSG00000101557	USP14	MPC>2	0.109283		0.109283	1	No	0.999872	No
ENSG00000135622	SEMA4F	PTV	0.109329		0.109329	1	No	0.999872	No
ENSG00000183431	SF3A3	PTV	0.109414		0.109414	1	No	0.999872	No
ENSG00000164638	SLC29A4	PTV	0.109453		0.109453	1	No	0.999872	No
ENSG00000137807	KIF23	MPC>2	0.109479		0.109479	1	No	0.999872	No
ENSG00000139613	SMARCC2	PTV+MPC>2	0.109739		0.109739	1	No	0.999872	No
ENSG00000113272	THG1L	PTV	0.109746		0.109746	1	No	0.999872	No
ENSG00000077097	TOP2B	PTV	0.109776		0.109776	1	No	0.999872	No
ENSG00000164893	SLC7A13	PTV	0.109813		0.109813	1	No	0.999872	No
ENSG00000185920	PTCH1	PTV+MPC>2	0.109846		0.109846	1	No	0.999872	No
ENSG00000250510	GPR162	MPC>2	0.110007		0.110007	1	No	0.999872	No
ENSG00000103855	CD276	PTV	0.110011		0.110011	1	No	0.999872	No
ENSG00000109208	SMR3A	PTV	0.11006		0.11006	1	No	0.999872	No
ENSG00000053254	FOXN3	PTV	0.110073		0.110073	1	No	0.999872	No
ENSG00000147724	FAM135B	PTV+MPC>2	0.110218		0.110218	1	No	0.999872	No
ENSG00000127362	TAS2R3	PTV	0.110308		0.110308	1	No	0.999872	No
ENSG00000162298	SYVN1	PTV	0.11037		0.11037	1	No	0.999872	No
ENSG00000229937	PRPS1L1	PTV	0.110479		0.110479	1	No	0.999872	No
ENSG00000079950	STX7	PTV	0.110571		0.110571	1	No	0.999872	No
ENSG00000079134	THOC1	PTV	0.110699		0.110699	1	No	0.999872	No
ENSG00000187446	CHP1	PTV	0.110704		0.110704	1	No	0.999872	No
ENSG00000067182	TNFRSF1A	PTV+MPC>2	0.110742		0.110742	1	No	0.999872	No
ENSG00000203963	C1orf141	PTV	0.11078		0.11078	1	No	0.999872	No
ENSG00000144369	FAM171B	PTV	0.110821		0.110821	1	No	0.999872	No
ENSG00000047579	DTNBP1	PTV	0.110833		0.110833	1	No	0.999872	No
ENSG00000103496	STX4	PTV	0.110875		0.110875	1	No	0.999872	No
ENSG00000185621	LMLN	PTV	0.110891		0.110891	1	No	0.999872	No
ENSG00000115523	GNLY	PTV	0.110913		0.110913	1	No	0.999872	No
ENSG00000114209	PDCD10	PTV	0.110962		0.110962	1	No	0.999872	No
ENSG00000174243	DDX23	PTV+MPC>2	0.111113		0.111113	1	No	0.999872	No
ENSG00000024048	UBR2	PTV	0.11122		0.11122	1	No	0.999872	No
ENSG00000107902	LHPP	PTV	0.111235		0.111235	1	No	0.999872	No
ENSG00000146755	TRIM50	PTV	0.111285		0.111285	1	No	0.999872	No
ENSG00000084764	MAPRE3	MPC>2	0.11129		0.11129	1	No	0.999872	No
ENSG00000166839	ANKDD1A	PTV	0.111296		0.111296	1	No	0.999872	No
ENSG00000112706	IMPG1	PTV	0.111317		0.111317	1	No	0.999872	No
ENSG00000203909	DPPA5	PTV+MPC>2	0.111386		0.111386	1	No	0.999872	No
ENSG00000138036	DYNC2LI1	PTV	0.111404		0.111404	1	No	0.999872	No
ENSG00000065978	YBX1	PTV	0.111585		0.111585	1	No	0.999872	No
ENSG00000132801	ZSWIM3	PTV	0.111589		0.111589	1	No	0.999872	No
ENSG00000134193	REG4	PTV	0.111617		0.111617	1	No	0.999872	No
ENSG00000088367	EPB41L1	PTV	0.111654		0.111654	1	No	0.999872	No
ENSG00000109654	TRIM2	PTV+MPC>2	0.111796		0.111796	1	No	0.999872	No
ENSG00000159713	TPPP3	PTV	0.111955		0.111955	1	No	0.999872	No
ENSG00000188883	KLRG2	PTV	0.11196		0.11196	1	No	0.999872	No
ENSG00000124802	EEF1E1	PTV	0.111991		0.111991	1	No	0.999872	No
ENSG00000130396	MLLT4	PTV+MPC>2	0.112044		0.112044	1	No	0.999872	No
ENSG00000011478	QPCTL	PTV	0.112048		0.112048	1	No	0.999872	No
ENSG00000091039	OSBPL8	PTV+MPC>3	0.112082		0.112082	1	No	0.999872	No
ENSG00000258227	CLEC5A	PTV	0.112243		0.112243	1	No	0.999872	No
ENSG00000132446	FTHL17	PTV	0.112243	1	0.112243	1	No	0.999872	No
ENSG00000198729	PPP1R14C	MPC>2	0.112428		0.112428	1	No	0.999872	No
ENSG00000164900	GBX1	PTV+MPC>2	0.112467		0.112467	1	No	0.999872	No
ENSG00000182223	ZAR1	PTV+MPC>2	0.112562		0.112562	1	No	0.999872	No
ENSG00000145649	GZMA	PTV	0.112584		0.112584	1	No	0.999872	No
ENSG00000174989	FBXW8	PTV	0.112701		0.112701	1	No	0.999872	No
ENSG00000136488	CSH1	PTV+MPC>2	0.112791		0.112791	1	No	0.999872	No
ENSG00000161270	NPHS1	PTV+MPC>2	0.112797		0.112797	1	No	0.999872	No
ENSG00000131015	ULBP2	MPC>2	0.112861		0.112861	1	No	0.999872	No
ENSG00000144048	DUSP11	PTV	0.11288		0.11288	1	No	0.999872	No
ENSG00000130734	ATG4D	PTV	0.112885		0.112885	1	No	0.999872	No
ENSG00000171459	OR1L6	PTV	0.11298		0.11298	1	No	0.999872	No
ENSG00000187566	NHLRC1	PTV	0.11312		0.11312	1	No	0.999872	No
ENSG00000152518	ZFP36L2	PTV	0.113129		0.113129	1	No	0.999872	No
ENSG00000186523	FAM86B1	PTV	0.113172		0.113172	1	No	0.999872	No
ENSG00000047346	FAM214A	PTV	0.113198		0.113198	1	No	0.999872	No
ENSG00000136522	MRPL47	PTV	0.113478		0.113478	1	No	0.999872	No
ENSG00000161057	PSMC2	PTV+MPC>3	0.113483		0.113483	1	No	0.999872	No
ENSG00000110583	NAA40	PTV	0.113573		0.113573	1	No	0.999872	No
ENSG00000160753	RUSC1	PTV+MPC>2	0.113659		0.113659	1	No	0.999872	No
ENSG00000165194	PCDH19	PTV	0.1137	1	0.1137	1	No	0.999872	No
ENSG00000203783	PRR9	PTV	0.113769		0.113769	1	No	0.999872	No
ENSG00000108176	DNAJC12	PTV	0.113805		0.113805	1	No	0.999872	No
ENSG00000102805	CLN5	PTV	0.113921		0.113921	1	No	0.999872	No
ENSG00000154096	THY1	PTV	0.113957		0.113957	1	No	0.999872	No
ENSG00000012983	MAP4K5	PTV	0.114015		0.114015	1	No	0.999872	No
ENSG00000167196	FBXO22	PTV	0.114137		0.114137	1	No	0.999872	No
ENSG00000043514	TRIT1	PTV	0.114152		0.114152	1	No	0.999872	No
ENSG00000255394	C8orf49	PTV	0.114267		0.114267	1	No	0.999872	No
ENSG00000113327	GABRG2	PTV	0.114465		0.114465	1	No	0.999872	No
ENSG00000074370	ATP2A3	PTV	0.114579		0.114579	1	No	0.999872	No
ENSG00000187180	LCE2C	PTV	0.114723		0.114723	1	No	0.999872	No
ENSG00000156017	C9orf41	MPC>2	0.114864		0.114864	1	No	0.999872	No
ENSG00000160868	CYP3A4	PTV	0.115029		0.115029	1	No	0.999872	No
ENSG00000198946	SSX4B	PTV+MPC>2	0.115068	1	0.115068	1	No	0.999872	No
ENSG00000162551	ALPL	PTV	0.115214		0.115214	1	No	0.999872	No
ENSG00000147481	SNTG1	PTV	0.115252		0.115252	1	No	0.999872	No
ENSG00000100302	RASD2	PTV	0.115257		0.115257	1	No	0.999872	No
ENSG00000075292	ZNF638	PTV	0.115496		0.115496	1	No	0.999872	No
ENSG00000104723	TUSC3	PTV	0.115551		0.115551	1	No	0.999872	No
ENSG00000125089	SH3TC1	PTV	0.115562		0.115562	1	No	0.999872	No
ENSG00000142864	SERBP1	PTV+MPC>2	0.11573		0.11573	1	No	0.999872	No
ENSG00000082146	STRADB	PTV+MPC>2	0.11581		0.11581	1	No	0.999872	No
ENSG00000165119	HNRNPK	PTV+MPC>3	0.115955		0.115955	1	No	0.999872	No
ENSG00000085644	ZNF213	PTV	0.116128		0.116128	1	No	0.999872	No
ENSG00000119471	HSDL2	PTV	0.116295		0.116295	1	No	0.999872	No
ENSG00000160284	SPATC1L	PTV	0.116307		0.116307	1	No	0.999872	No
ENSG00000133636	NTS	PTV	0.116323		0.116323	1	No	0.999872	No
ENSG00000014216	CAPN1	PTV	0.116358		0.116358	1	No	0.999872	No
ENSG00000143970	ASXL2	PTV	0.1164		0.1164	1	No	0.999872	No
ENSG00000125409	TEKT3	PTV	0.116471		0.116471	1	No	0.999872	No
ENSG00000158290	CUL4B	PTV+MPC>2	0.116474	0.0583928	0.116474	1	No	0.999872	No
ENSG00000101977	MCF2	PTV	0.116508	1	0.116508	1	No	0.999872	No
ENSG00000165633	VSTM4	PTV	0.116577		0.116577	1	No	0.999872	No
ENSG00000148053	NTRK2	PTV+MPC>2	0.116578		0.116578	1	No	0.999872	No
ENSG00000197976	AKAP17A	PTV	0.116624		0.116624	1	No	0.999872	No
ENSG00000007952	NOX1	PTV	0.11665	1	0.11665	1	No	0.999872	No
ENSG00000105793	GTPBP10	PTV	0.116709		0.116709	1	No	0.999872	No
ENSG00000101251	SEL1L2	PTV	0.116712		0.116712	1	No	0.999872	No
ENSG00000089057	SLC23A2	PTV	0.116727		0.116727	1	No	0.999872	No
ENSG00000197275	RAD54B	PTV	0.116842		0.116842	1	No	0.999872	No
ENSG00000172795	DCP2	PTV	0.116979		0.116979	1	No	0.999872	No
ENSG00000167874	TMEM88	MPC>2	0.116982		0.116982	1	No	0.999872	No
ENSG00000213759	UGT2B11	PTV	0.117009		0.117009	1	No	0.999872	No
ENSG00000170832	USP32	PTV	0.117203		0.117203	1	No	0.999872	No
ENSG00000205678	TECRL	PTV	0.117291		0.117291	1	No	0.999872	No
ENSG00000254221	PCDHGB1	PTV	0.117376		0.117376	1	No	0.999872	No
ENSG00000100395	L3MBTL2	MPC>2	0.117475		0.117475	1	No	0.999872	No
ENSG00000175643	RMI2	PTV	0.117475		0.117475	1	No	0.999872	No
ENSG00000102195	GPR50	PTV	0.117475	1	0.117475	1	No	0.999872	No
ENSG00000142002	DPP9	MPC>2	0.117538		0.117538	1	No	0.999872	No
ENSG00000182247	UBE2E2	PTV	0.117613		0.117613	1	No	0.999872	No
ENSG00000136869	TLR4	PTV	0.117766		0.117766	1	No	0.999872	No
ENSG00000131323	TRAF3	PTV+MPC>2	0.11789		0.11789	1	No	0.999872	No
ENSG00000135778	NTPCR	PTV	0.117967		0.117967	1	No	0.999872	No
ENSG00000142449	FBN3	PTV	0.117992		0.117992	1	No	0.999872	No
ENSG00000108557	RAI1	PTV	0.118005		0.118005	1	No	0.999872	No
ENSG00000148735	PLEKHS1	PTV	0.118137		0.118137	1	No	0.999872	No
ENSG00000184708	EIF4ENIF1	PTV	0.118305		0.118305	1	No	0.999872	No
ENSG00000118514	ALDH8A1	PTV	0.11843		0.11843	1	No	0.999872	No
ENSG00000213588	ZBTB9	PTV	0.118595		0.118595	1	No	0.999872	No
ENSG00000113734	BNIP1	PTV	0.118664		0.118664	1	No	0.999872	No
ENSG00000143320	CRABP2	PTV	0.11873		0.11873	1	No	0.999872	No
ENSG00000103194	USP10	PTV	0.118731		0.118731	1	No	0.999872	No
ENSG00000214814	FER1L6	PTV	0.118759		0.118759	1	No	0.999872	No
ENSG00000177938	CAPZA3	PTV	0.118824		0.118824	1	No	0.999872	No
ENSG00000173876	TUBB8	PTV+MPC>3	0.118836		0.118836	1	No	0.999872	No
ENSG00000203685	C1orf95	PTV+MPC>2	0.118905		0.118905	1	No	0.999872	No
ENSG00000206579	XKR4	MPC>2	0.11895		0.11895	1	No	0.999872	No
ENSG00000143768	LEFTY2	PTV	0.118967		0.118967	1	No	0.999872	No
ENSG00000158473	CD1D	PTV	0.118979		0.118979	1	No	0.999872	No
ENSG00000143473	KCNH1	PTV+MPC>2	0.119013		0.119013	1	No	0.999872	No
ENSG00000021574	SPAST	PTV	0.119045		0.119045	1	No	0.999872	No
ENSG00000072444	ASAH2C	PTV+MPC>3	0.119056		0.119056	1	No	0.999872	No
ENSG00000155754	ALS2CR11	PTV	0.1191		0.1191	1	No	0.999872	No
ENSG00000105996	HOXA2	PTV+MPC>2	0.119124		0.119124	1	No	0.999872	No
ENSG00000166948	TGM6	PTV	0.119154		0.119154	1	No	0.999872	No
ENSG00000144426	NBEAL1	PTV	0.11918		0.11918	1	No	0.999872	No
ENSG00000160298	C21orf58	PTV	0.119216		0.119216	1	No	0.999872	No
ENSG00000112658	SRF	PTV+MPC>2	0.119249		0.119249	1	No	0.999872	No
ENSG00000249222	ATP5L2	PTV	0.119257		0.119257	1	No	0.999872	No
ENSG00000182107	TMEM30B	PTV	0.119353		0.119353	1	No	0.999872	No
ENSG00000220008	LINGO3	PTV	0.119374		0.119374	1	No	0.999872	No
ENSG00000198431	TXNRD1	PTV	0.119479		0.119479	1	No	0.999872	No
ENSG00000084774	CAD	PTV+MPC>2	0.119513		0.119513	1	No	0.999872	No
ENSG00000110756	HPS5	PTV	0.119521		0.119521	1	No	0.999872	No
ENSG00000129167	TPH1	PTV	0.119552		0.119552	1	No	0.999872	No
ENSG00000167555	ZNF528	PTV	0.119697		0.119697	1	No	0.999872	No
ENSG00000007264	MATK	PTV	0.119809		0.119809	1	No	0.999872	No
ENSG00000021355	SERPINB1	PTV	0.11982		0.11982	1	No	0.999872	No
ENSG00000165943	MOAP1	PTV	0.119824		0.119824	1	No	0.999872	No
ENSG00000009830	POMT2	PTV	0.119859		0.119859	1	No	0.999872	No
ENSG00000221813	OR6B1	PTV	0.119987		0.119987	1	No	0.999872	No
ENSG00000156599	ZDHHC5	PTV+MPC>2	0.120212		0.120212	1	No	0.999872	No
ENSG00000114480	GBE1	PTV	0.120314		0.120314	1	No	0.999872	No
ENSG00000156575	PRG3	PTV	0.120344		0.120344	1	No	0.999872	No
ENSG00000108684	ASIC2	PTV+MPC>2	0.120351		0.120351	1	No	0.999872	No
ENSG00000137075	RNF38	PTV	0.120398		0.120398	1	No	0.999872	No
ENSG00000082512	TRAF5	PTV	0.120498		0.120498	1	No	0.999872	No
ENSG00000136504	KAT7	MPC>2	0.120499		0.120499	1	No	0.999872	No
ENSG00000087470	DNM1L	MPC>2	0.120739		0.120739	1	No	0.999872	No
ENSG00000048162	NOP16	PTV	0.120949		0.120949	1	No	0.999872	No
ENSG00000136161	RCBTB2	PTV	0.120989		0.120989	1	No	0.999872	No
ENSG00000135318	NT5E	PTV	0.121052		0.121052	1	No	0.999872	No
ENSG00000198822	GRM3	MPC>2	0.121106		0.121106	1	No	0.999872	No
ENSG00000187600	TMEM247	PTV	0.121197		0.121197	1	No	0.999872	No
ENSG00000069712	KIAA1107	PTV	0.121239		0.121239	1	No	0.999872	No
ENSG00000100024	UPB1	PTV	0.12128		0.12128	1	No	0.999872	No
ENSG00000104722	NEFM	PTV	0.121322		0.121322	1	No	0.999872	No
ENSG00000167633	KIR3DL1	PTV	0.121619		0.121619	1	No	0.999872	No
ENSG00000204481	PRAMEF14	PTV+MPC>2	0.121742		0.121742	1	No	0.999872	No
ENSG00000119682	AREL1	PTV	0.121789		0.121789	1	No	0.999872	No
ENSG00000146540	C7orf50	PTV	0.121875		0.121875	1	No	0.999872	No
ENSG00000163961	RNF168	PTV	0.121893		0.121893	1	No	0.999872	No
ENSG00000102466	FGF14	PTV	0.122041		0.122041	1	No	0.999872	No
ENSG00000120899	PTK2B	PTV	0.122251		0.122251	1	No	0.999872	No
ENSG00000111252	SH2B3	PTV+MPC>2	0.122311		0.122311	1	No	0.999872	No
ENSG00000126062	TMEM115	PTV	0.122381		0.122381	1	No	0.999872	No
ENSG00000120251	GRIA2	PTV+MPC>2	0.12242		0.12242	1	No	0.999872	No
ENSG00000058272	PPP1R12A	MPC>2	0.122482		0.122482	1	No	0.999872	No
ENSG00000134013	LOXL2	PTV	0.12257		0.12257	1	No	0.999872	No
ENSG00000177602	GSG2	PTV	0.122607		0.122607	1	No	0.999872	No
ENSG00000106123	EPHB6	PTV	0.122629		0.122629	1	No	0.999872	No
ENSG00000140463	BBS4	PTV	0.122721		0.122721	1	No	0.999872	No
ENSG00000095564	BTAF1	PTV	0.122808		0.122808	1	No	0.999872	No
ENSG00000173809	TDRD12	PTV	0.122814		0.122814	1	No	0.999872	No
ENSG00000079999	KEAP1	MPC>2	0.122815		0.122815	1	No	0.999872	No
ENSG00000157557	ETS2	MPC>2	0.123106		0.123106	1	No	0.999872	No
ENSG00000183527	PSMG1	PTV	0.123151		0.123151	1	No	0.999872	No
ENSG00000137713	PPP2R1B	PTV	0.123225		0.123225	1	No	0.999872	No
ENSG00000198835	GJC2	PTV	0.123232		0.123232	1	No	0.999872	No
ENSG00000152767	FARP1	PTV	0.12347		0.12347	1	No	0.999872	No
ENSG00000116729	WLS	PTV	0.123483		0.123483	1	No	0.999872	No
ENSG00000105610	KLF1	PTV	0.123503		0.123503	1	No	0.999872	No
ENSG00000100084	HIRA	PTV+MPC>2	0.123585		0.123585	1	No	0.999872	No
ENSG00000091073	DTX2	PTV+MPC>2	0.123606		0.123606	1	No	0.999872	No
ENSG00000108639	SYNGR2	PTV	0.123673		0.123673	1	No	0.999872	No
ENSG00000130950	NUTM2F	PTV	0.123884		0.123884	1	No	0.999872	No
ENSG00000137073	UBAP2	PTV	0.123951		0.123951	1	No	0.999872	No
ENSG00000132561	MATN2	PTV	0.124039		0.124039	1	No	0.999872	No
ENSG00000147488	ST18	PTV	0.124098		0.124098	1	No	0.999872	No
ENSG00000139574	NPFF	PTV	0.124104		0.124104	1	No	0.999872	No
ENSG00000187094	CCK	MPC>2	0.124187		0.124187	1	No	0.999872	No
ENSG00000136875	PRPF4	PTV+MPC>2	0.124194		0.124194	1	No	0.999872	No
ENSG00000139697	SBNO1	PTV	0.124195		0.124195	1	No	0.999872	No
ENSG00000139874	SSTR1	MPC>2	0.124345		0.124345	1	No	0.999872	No
ENSG00000100784	RPS6KA5	PTV	0.124392		0.124392	1	No	0.999872	No
ENSG00000157388	CACNA1D	PTV	0.124398		0.124398	1	No	0.999872	No
ENSG00000150593	PDCD4	PTV	0.124419		0.124419	1	No	0.999872	No
ENSG00000166181	API5	PTV	0.124579		0.124579	1	No	0.999872	No
ENSG00000134014	ELP3	PTV	0.124676		0.124676	1	No	0.999872	No
ENSG00000126106	TMEM53	PTV	0.12469		0.12469	1	No	0.999872	No
ENSG00000101222	SPEF1	PTV	0.124898		0.124898	1	No	0.999872	No
ENSG00000147799	ARHGAP39	PTV	0.124981		0.124981	1	No	0.999872	No
ENSG00000113600	C9	PTV	0.125106		0.125106	1	No	0.999872	No
ENSG00000116874	WARS2	PTV	0.125146		0.125146	1	No	0.999872	No
ENSG00000140326	CDAN1	MPC>2	0.125199		0.125199	1	No	0.999872	No
ENSG00000163053	SLC16A14	PTV	0.125283		0.125283	1	No	0.999872	No
ENSG00000000460	C1orf112	PTV	0.125331		0.125331	1	No	0.999872	No
ENSG00000185467	KPNA7	PTV	0.125523		0.125523	1	No	0.999872	No
ENSG00000123901	GPR83	PTV	0.12555		0.12555	1	No	0.999872	No
ENSG00000104889	RNASEH2A	PTV	0.125675		0.125675	1	No	0.999872	No
ENSG00000215021	PHB2	PTV+MPC>2	0.125805		0.125805	1	No	0.999872	No
ENSG00000196139	AKR1C3	PTV	0.125806		0.125806	1	No	0.999872	No
ENSG00000213246	SUPT4H1	PTV+MPC>2	0.125933		0.125933	1	No	0.999872	No
ENSG00000013563	DNASE1L1	PTV	0.126058	1	0.126058	1	No	0.999872	No
ENSG00000149541	B3GAT3	PTV	0.126073		0.126073	1	No	0.999872	No
ENSG00000054356	PTPRN	PTV	0.126075		0.126075	1	No	0.999872	No
ENSG00000111049	MYF5	PTV	0.126109		0.126109	1	No	0.999872	No
ENSG00000196562	SULF2	PTV	0.126151		0.126151	1	No	0.999872	No
ENSG00000140478	GOLGA6D	PTV+MPC>2	0.126227		0.126227	1	No	0.999872	No
ENSG00000112584	FAM120B	PTV	0.126363		0.126363	1	No	0.999872	No
ENSG00000175550	DRAP1	PTV+MPC>2	0.126409		0.126409	1	No	0.999872	No
ENSG00000134294	SLC38A2	PTV	0.12656		0.12656	1	No	0.999872	No
ENSG00000261247	GOLGA8T	PTV+MPC>3	0.126578		0.126578	1	No	0.999872	No
ENSG00000161547	SRSF2	PTV+MPC>2	0.126661		0.126661	1	No	0.999872	No
ENSG00000165120	SSMEM1	PTV	0.126742		0.126742	1	No	0.999872	No
ENSG00000184209	SNRNP35	PTV	0.126747		0.126747	1	No	0.999872	No
ENSG00000163914	RHO	PTV	0.12676		0.12676	1	No	0.999872	No
ENSG00000103067	ESRP2	PTV	0.126787		0.126787	1	No	0.999872	No
ENSG00000184752	NDUFA12	PTV	0.126853		0.126853	1	No	0.999872	No
ENSG00000129535	NRL	MPC>2	0.126907		0.126907	1	No	0.999872	No
ENSG00000129691	ASH2L	PTV	0.127013		0.127013	1	No	0.999872	No
ENSG00000165650	PDZD8	PTV+MPC>2	0.12703		0.12703	1	No	0.999872	No
ENSG00000137857	DUOX1	PTV	0.127122		0.127122	1	No	0.999872	No
ENSG00000101052	IFT52	PTV	0.127155		0.127155	1	No	0.999872	No
ENSG00000186513	OR9Q2	PTV	0.127201		0.127201	1	No	0.999872	No
ENSG00000147677	EIF3H	MPC>2	0.127256		0.127256	1	No	0.999872	No
ENSG00000149043	SYT8	PTV	0.12742		0.12742	1	No	0.999872	No
ENSG00000172216	CEBPB	PTV+MPC>2	0.127509		0.127509	1	No	0.999872	No
ENSG00000178996	SNX18	PTV	0.127534		0.127534	1	No	0.999872	No
ENSG00000163283	ALPP	MPC>2	0.127608		0.127608	1	No	0.999872	No
ENSG00000109332	UBE2D3	PTV	0.127723		0.127723	1	No	0.999872	No
ENSG00000149922	TBX6	PTV	0.127768		0.127768	1	No	0.999872	No
ENSG00000170549	IRX1	PTV	0.127892		0.127892	1	No	0.999872	No
ENSG00000166734	CASC4	PTV	0.12793		0.12793	1	No	0.999872	No
ENSG00000164904	ALDH7A1	PTV	0.127933		0.127933	1	No	0.999872	No
ENSG00000204463	BAG6	PTV	0.127979		0.127979	1	No	0.999872	No
ENSG00000172232	AZU1	PTV	0.127989		0.127989	1	No	0.999872	No
ENSG00000052344	PRSS8	PTV	0.128028		0.128028	1	No	0.999872	No
ENSG00000085999	RAD54L	PTV	0.128028		0.128028	1	No	0.999872	No
ENSG00000175899	A2M	PTV	0.128065		0.128065	1	No	0.999872	No
ENSG00000155893	ACPL2	PTV	0.128134		0.128134	1	No	0.999872	No
ENSG00000023171	GRAMD1B	MPC>2	0.128176		0.128176	1	No	0.999872	No
ENSG00000197798	FAM118B	PTV	0.12835		0.12835	1	No	0.999872	No
ENSG00000116039	ATP6V1B1	PTV	0.128482		0.128482	1	No	0.999872	No
ENSG00000101958	GLRA2	MPC>2	0.128719	1	0.128719	1	No	0.999872	No
ENSG00000141968	VAV1	PTV	0.128756		0.128756	1	No	0.999872	No
ENSG00000142686	C1orf216	PTV	0.128761		0.128761	1	No	0.999872	No
ENSG00000196653	ZNF502	PTV	0.128813		0.128813	1	No	0.999872	No
ENSG00000148950	IMMP1L	PTV	0.128849		0.128849	1	No	0.999872	No
ENSG00000130309	COLGALT1	PTV	0.128914		0.128914	1	No	0.999872	No
ENSG00000181830	SLC35C1	PTV	0.129002		0.129002	1	No	0.999872	No
ENSG00000184661	CDCA2	PTV	0.129055		0.129055	1	No	0.999872	No
ENSG00000010327	STAB1	PTV	0.129157		0.129157	1	No	0.999872	No
ENSG00000136169	SETDB2	PTV	0.129201		0.129201	1	No	0.999872	No
ENSG00000180263	FGD6	PTV	0.129282		0.129282	1	No	0.999872	No
[truncated: 16,044 more rows]
