# Supplementary material
Source: Research Square preprint supplement (doi:10.21203/rs.3.rs-9869940/v1)
Supplement: Supplementary file 7 [file e34b8ec9fd922da45db21c07.xlsx]

## Sheet: Panel A - TADA Gene Discovery
Rank	Gene	Chr	LOEUF	BF_PTV	BF_MisB	BF_MisA	BF_Del	BF_Dup	BF_total	log₁₀(BF)	Bayesian FDR
1	SCN2A	2	0.127	7.28242e+30	6.86024e+20	19.41	6.24771	1	6.05846e+53	53.7824	0
2	SHANK3	22	0.123	2.54584e+20	1	1	1.77827e+22	622.431	2.81786e+45	45.4499	0
3	CHD8	14	0.082	1.09029e+30	2.97564e+08	25.9456	1	1	8.41756e+39	39.9252	0
4	SYNGAP1	6	0.052	4.07397e+26	121800	2.09597	169.636	1	1.76428e+34	34.2466	0
5	ADNP	20	0.123	2.49955e+31	1	1	1	1	2.49955e+31	31.3979	0
6	PTEN	10	0.507	5864.67	4.47971e+22	79.2784	1.35325	1	2.81855e+28	28.45	0
7	CHD2	15	0.07	2.18061e+12	794262	1.25204	224.45	1	4.86722e+20	20.6873	0
8	FOXP1	3	0.175	6726799627554791	3980.01	1	3.41066	2.06068	1.88166e+20	20.2745	0
9	NRXN1	2	0.254	1037.75	1	1	102073872396187	1.58668	1.68072e+17	17.2255	1.23358e-17
10	POGZ	1	0.119	2061536408807600	18.9025	1.25111	1	1	4.87532e+16	16.688	5.55112e-17
11	GRIN2B	12	0.061	7.8478e+10	3862	2.95291	11.9739	1	1.07163e+16	16.03	2.11952e-16
12	ASH1L	1	0.062	3.79952e+13	16.3015	1.38046	1	1	855030957166994	14.932	2.05391e-15
13	KDM5B	1	0.572	3.56733e+09	1177.39	26.3374	1	1	110620699996624	14.0438	1.51076e-14
14	KMT5B	11	0.078	2.54321e+13	1.72729	1.29535	1	1	5.69031e+13	13.7551	3.78824e-14
15	SLC6A1	3	0.15	11.4494	7.1819e+11	1.19816	1	1	9.8523e+12	12.9935	1.63921e-13
16	ASXL3	18	0.199	5.98109e+12	1	1	1	1	5.98109e+12	12.7768	3.52218e-13
17	ARID1B	6	0.102	6.95606e+08	8.97824	31.4276	10.498	1	2.06049e+12	12.314	8.73915e-13
18	NF1	17	0.29	37706.7	47770.9	23.6436	1	1	4.25888e+10	10.6293	2.56102e-11
19	DYRK1A	21	0.214	1.70644e+10	1.76966	1.27136	1	1	3.83926e+10	10.5842	5.0309e-11
20	MBD5	2	0.136	5.72821e+07	1	1	168.516	1	9.65294e+09	9.98466	1.46209e-10
21	GIGYF1	7	0.484	6.18245e+09	1	1	1	1	6.18245e+09	9.79116	2.8559e-10
22	STXBP1	9	0.086	159931	11362.2	1	1	1	1.81717e+09	9.2594	7.47874e-10
23	DYNC1H1	14	0.08	2163.15	47770.2	6.6078	1	1	6.82812e+08	8.8343	1.92519e-09
24	RFX3	9	0.104	13941.5	8170.25	1	1	4.57833	5.21497e+08	8.71725	3.36304e-09
25	RORB	9	0.112	152199	112.502	1.11575	8.05164	1	1.53823e+08	8.18702	8.16926e-09
26	SCN1A	2	0.071	11802.3	12.8883	626.77	1	1	9.53389e+07	7.97927	1.552e-08
27	NAA15	4	0.28	2.22387e+07	1	1.21008	1	2.61901	7.04793e+07	7.84806	2.49297e-08
28	MED13	17	0.03	1.91017e+07	2.29788	1.15531	1	1	5.07104e+07	7.7051	3.74207e-08
29	DLG4	17	0.238	726038	12.3079	1.46979	1	2.35744	3.09628e+07	7.49084	5.72903e-08
30	TLK2	17	0.114	5388.65	2651.85	1.10426	1	1	1.57797e+07	7.1981	9.55167e-08
31	EHMT1	9	0.072	560078	2.37225	1	11.4382	1	1.51973e+07	7.18177	1.32765e-07
32	CTCF	16	0.148	219703	3.18109	1.92172	9.8291	1	1.32013e+07	7.12062	1.73593e-07
33	WAC	10	0.084	6.57238e+06	1	1	1	1	6.57238e+06	6.81772	2.55935e-07
34	DEAF1	11	0.698	1	575.558	9945.68	1	1	5.72432e+06	6.75772	3.4603e-07
35	SLK	10	0.348	2.5132e+06	1.7661	1.20275	1	1	5.3385e+06	6.72742	4.3783e-07
36	KMT2C	7	0.122	20879.9	1.28652	25.9841	1	7.23552	5.05038e+06	6.70332	5.3017e-07
37	KCNB1	20	0.125	7.99592	570365	1.04258	1	1	4.75479e+06	6.67713	6.2384e-07
38	KMT2A	11	0.065	4729.03	132.315	6.57019	1	1	4.11111e+06	6.61396	7.29044e-07
39	MED13L	12	0.064	882847	1.24957	3.37316	1	1	3.72121e+06	6.57068	8.4127e-07
40	SATB2	2	0.091	166.393	18929.9	1	1	1	3.14981e+06	6.49828	9.7104e-07
41	ATP2B2	3	0.148	21.5049	83239.9	1.23824	1	1	2.21653e+06	6.34567	1.15643e-06
42	CUL3	2	0.228	461114	4.47255	1.02248	1	1	2.10871e+06	6.32402	1.34342e-06
43	KDM6B	17	0.14	58108.4	31.0321	1	1	1	1.80323e+06	6.25605	1.55721e-06
44	BRSK2	11	0.329	238101	1	1.27707	5.79363	1	1.76169e+06	6.24593	1.76694e-06
45	SETD5	3	0.227	349778	1	1.42877	3.16919	1	1.58382e+06	6.1997	1.99425e-06
46	ANKRD11	16	0.107	90143.3	1	1.08183	10.8446	1	1.05756e+06	6.02431	2.34145e-06
47	AP2S1	19	0.502	2.85614	308110	1.07584	1	1	946748	5.97623	2.71862e-06
48	AUTS2	7	0.253	387.219	1.07637	1.23047	1648.06	1	845205	5.92696	3.1303e-06
49	SMARCC2	12	0.117	347018	1.41051	1	1	1	489474	5.68973	3.85857e-06
50	ITSN1	21	0.221	941.81	375.917	1.25059	1	1	442764	5.64617	4.63961e-06
51	ANK2	4	0.106	44330.4	1	8.64112	1	1	383064	5.58327	5.52114e-06
52	SPEN	1	0.071	3188.42	34.8798	3.12698	1	1	347755	5.54127	6.4656e-06
53	ZNF292	6	0.14	134079	1	1	2.56799	1	344313	5.53695	7.38473e-06
54	MEIS2	15	0.184	84.3323	354.209	1.16275	8.93818	1	310450	5.49199	8.38126e-06
55	MYT1L	2	0.087	3224.61	79.5413	1	1	1	256489	5.40907	9.57564e-06
56	DNMT3A	2	1.581	3.67445	1	66624.9	1	1	244810	5.38883	1.07904e-05
57	SHANK2	11	0.458	14234.2	1	3.21302	3.80864	1	174187	5.24102	1.25146e-05
58	CTNNB1	3	0.129	148661	1	1.01294	1	1	150584	5.17778	1.4474e-05
59	TAOK1	17	0.274	3986.02	4.75068	1.04214	6.881	1	135792	5.13287	1.65998e-05
60	EBF3	10	0.15	66.3011	1351	1.1061	1	1	99076.4	4.99597	1.95188e-05
61	KCNMA1	10	0.276	14.6333	5438.01	1.15845	1	1	92185	4.96466	2.25769e-05
62	NIPBL	5	0.032	1	38.5006	1.39225	1	1546.09	82874.2	4.91842	2.59097e-05
63	TRIP12	2	0.06	75.2329	542.817	2.00262	1	1	81782.2	4.91266	2.91853e-05
64	KCNQ3	8	0.356	1	71831.4	1.08791	1	1	78146.2	4.89291	3.25273e-05
65	GABRA1	5	0.367	2.80797	15191	1.1806	1	1	50359.6	4.70208	3.78291e-05
66	SPAST	2	0.224	1012.59	46.7083	1.01563	1	1	48035.4	4.68156	4.32466e-05
67	TBR1	2	0.194	8705.81	1	1	4.29364	1	37379.6	4.57264	5.01838e-05
68	CREBBP	16	0.066	13.9318	6.82193	18.6917	11.8519	1	21054.8	4.32335	6.27045e-05
69	IRF2BPL	14	0.405	19979.1	1	1	1	1	19979.1	4.30058	7.55652e-05
70	ZBTB20	3	0.317	52.5419	74.66	1.26543	3.86059	1	19164	4.28249	8.86351e-05
71	SKI	1	0.194	8467.53	1.33798	1.31483	1	1	14896.3	4.17308	0.000105328
72	TCF20	22	0.095	13717.5	1	1	1	1	13717.5	4.13728	0.000123076
73	SMC3	10	0.037	1	12632.2	1	1	1	12632.2	4.10148	0.000141963
74	CSNK2A1	20	0.297	6.36855	1941.11	1	1	1	12362.1	4.09209	0.000160783
75	BRD4	19	0.048	3.87786	1	8.18053	1	388.563	12326.3	4.09083	0.00017916
76	PHF21A	11	0.08	10299	1	1.18622	1	1	12216.8	4.08696	0.000197234
77	CAPRIN1	11	0.311	12071.9	1	1	1	1	12071.9	4.08178	0.000215081
78	PACS1	11	0.185	1.19448	10034	1	1	1	11985.3	4.07865	0.000232615
79	UBR5	8	0.073	1052.48	1	9.8729	1	1	10391.1	4.01666	0.000252774
80	MED23	6	0.501	1	1610.83	5.55887	1	1	8954.39	3.95204	0.000276081
81	TBL1XR1	3	0.106	15.4235	402.848	1.42536	1	1	8856.18	3.94725	0.000299103
82	PRDM15	21	0.455	14.6511	1	1.63998	1	355.997	8553.7	3.93215	0.000322483
83	TANC2	17	0.158	8030.4	1	1	1	1	8030.4	3.90474	0.000347037
84	TCF4	18	0.217	170.745	4.97799	1	8.14846	1	6925.92	3.84048	0.000375475
85	DSCAM	21	0.189	1695.15	1	3.91352	1	1	6633.99	3.82177	0.000404656
86	VEZF1	17	0.24	5.61361	1163.81	1	1	1	6533.18	3.81512	0.000433669
87	CDK13	7	0.324	27.1681	189.216	1.15553	1	1	5940.13	3.7738	0.000465332
88	NR4A2	2	0.133	4.58837	11.1761	1.00039	16.0334	7.0381	5788.92	3.7626	0.000497219
89	TCF7L2	10	0.273	125.955	6.3273	1.02486	6.90204	1	5637.37	3.75108	0.000529375
90	CASZ1	1	0.152	4461.39	1	1	1	1	4461.39	3.64947	0.000570612
91	CHD3	17	0.147	1	4272.93	1	1	1	4272.93	3.63073	0.000612989
92	DLL1	6	0.095	7.92865	1	1.14226	78.4659	5.77641	4104.91	3.6133	0.000656405
93	CASKIN1	16	0.164	1	3284.72	1.10777	1	1	3638.73	3.56095	0.000705201
94	SRPRA	11	0.39	158.936	1	4.63653	4.75435	1	3503.54	3.54451	0.00075508
95	MLXIP	12	0.294	473.568	1	1.02563	6.46951	1	3142.28	3.49725	0.000810398
96	PLXNA1	3	0.262	2.12457	146.484	2.00354	1	4.89998	3055.3	3.48505	0.000866334
97	PSMD11	17	0.159	2.97857	932.741	1.09176	1	1	3033.16	3.4819	0.000921579
98	PBX1	1	0.255	52.0394	52.8529	1.05054	1	1	2889.45	3.46082	0.000978835
99	ATP1A3	19	0.062	1	1880.5	1.39261	1	1	2618.81	3.4181	0.0010417
100	PIK3CA	3	0.117	1	41.3452	1.02841	10.0772	5.79738	2484.06	3.39516	0.0011072
101	KIF1B	1	0.171	2.22934	473.973	1.96912	1	1	2080.66	3.3182	0.00118583
102	CACNA1D	3	0.214	1	748.238	2.68618	1	1	2009.9	3.30317	0.00126601
103	PAX5	9	0.165	131.193	12.2421	1.19324	1	1	1916.43	3.28249	0.00134903
104	CSNK1E	22	0.143	1.72891	87.9418	5.66634	1	2.1312	1836.08	3.26389	0.00143454
105	CYFIP2	5	0.092	8.48774	208.083	1.0317	1	1	1822.13	3.26058	0.00151916
106	ATXN2	12	0.333	182.151	1	1.7064	5.72004	1	1777.92	3.24991	0.00160458
107	AGO4	1	0.218	1.06024	1594.25	1	1	1	1690.28	3.22796	0.00169347
108	TAF4	20	0.081	73.9264	1.13039	1.71116	11.4843	1	1642.2	3.21543	0.00178369
109	NCKAP1	2	0.044	19.8969	6.41421	1	12.3844	1	1580.53	3.1988	0.00187631
110	KIF5C	2	0.117	1	1345.33	1.15473	1	1	1553.49	3.19131	0.00196909
111	SIN3A	15	0.07	4.11456	242.679	1.47921	1	1	1477.02	3.16939	0.00206577
112	ITPR3	6	0.569	6.04701	7.11161	33.2907	1	1	1431.63	3.15583	0.00216427
113	SMARCA2	9	0.203	1	77.2812	1	8.47921	2.18017	1428.63	3.15492	0.00226127
114	GRIA2	4	0.247	36.6972	6.23619	5.96217	1	1	1364.45	3.13496	0.0023619
115	MEF2C	5	0.608	7.40999	166.183	1.06237	1	1	1308.21	3.11668	0.00246585
116	PHF12	17	0.135	1172.85	1	1.09985	1	1	1289.96	3.11058	0.00256972
117	ACVR2A	2	0.17	1	8.9967	1	143.324	1	1289.44	3.1104	0.00267187
118	SMARCA4	19	0.055	1	792.27	1.59905	1	1	1266.88	3.10274	0.00277445
119	EP300	22	0.099	111.393	1	1	11.0417	1	1229.97	3.08989	0.00287897
120	ZMYM2	13	0.332	102.724	11.1227	1	1	1	1142.57	3.05788	0.00299129
121	TSC1	9	0.118	867.932	1	1.26668	1	1	1099.39	3.04115	0.00310697
122	ZMYND8	20	0.131	680.797	1	1.368	1	1	931.329	2.9691	0.00324538
123	PRH1	12	1.361	908.601	1	1	1	1	908.601	2.95837	0.00338552
124	CGREF1	2	1.872	886.256	1	1	1	1	886.256	2.94756	0.00352748
125	TNPO3	7	0.515	3.31802	236.399	1.12434	1	1	881.904	2.94542	0.00366798
126	HNRNPU	1	0.114	5.52693	1.83731	1.11878	10.7957	7.10574	871.504	2.94027	0.00380821
127	HNRNPUL2	11	0.227	591.627	1	1.4444	1	1	854.544	2.93173	0.00394949
128	CELF2	10	0.174	308.679	1.00939	1	2.70932	1	844.159	2.92642	0.0040906
129	PSMD12	17	0.162	440.723	1.23413	1	1	1.51759	825.431	2.91668	0.00423331
130	CAMTA2	17	0.262	4.35633	186.563	1	1	1	812.73	2.90995	0.00437647
131	NAA25	12	0.108	8.52399	82.7197	1.11493	1	1	786.141	2.8955	0.0045232
132	TRIM23	5	0.58	4.64122	166.035	1	1	1	770.604	2.88683	0.00467123
133	MYO18A	17	0.287	3.12196	22.7808	1.57069	6.61147	1	738.557	2.86838	0.00482468
134	BTBD10	11	0.612	1.37262	437.633	1.18246	1	1	710.306	2.85145	0.0049831
135	PAPOLG	2	0.266	1.18753	11.9585	48.8724	1	1	694.04	2.84138	0.00514357
136	BAZ1B	7	0.109	1.84052	243.108	1.54159	1	1	689.779	2.83871	0.00530285
137	NOTCH1	9	0.097	12.2995	29.5623	1.88966	1	1	687.084	2.83701	0.00546056
138	HSP90AB1	6	0.213	678.303	1	1	1	1	678.303	2.83142	0.00561844
139	FBXO11	2	0.097	4.91386	39.9461	1.01681	1	3.3496	668.543	2.82513	0.00577683
140	ATG13	11	0.328	3.85328	167.622	1.01291	1	1	654.232	2.81573	0.00593715
141	STRIP1	1	0.55	1.97967	156.006	2.0534	1	1	634.174	2.80221	0.00610135
142	DIP2A	21	0.354	28.0262	2.32276	1.68443	5.34614	1	586.222	2.76806	0.00627946
143	PDS5B	13	0.18	12.3615	1	1	9.03608	5.1484	575.076	2.75973	0.0064592
144	KCNG3	2	0.638	1.00413	510.576	1.11209	1	1	570.147	2.75599	0.00663831
145	INTS3	1	0.251	1	357.67	1.48447	1	1	530.951	2.72505	0.00683079
146	CLEC16A	16	0.384	225.631	1.86779	1.22723	1	1	517.192	2.71365	0.00702671
147	SYNCRIP	6	0.209	156.199	1.62143	1.08178	1.88091	1	515.327	2.71208	0.00722081
148	EIF4G2	11	0.085	488.099	1	1	1	1	488.099	2.68851	0.00742518
149	GABBR2	9	0.167	1.19303	37.215	10.6893	1	1	474.592	2.67632	0.00763369
150	ANKH	5	0.499	1.24885	331.185	1.11562	1	1	461.42	2.6641	0.00784646
151	MARK2	11	0.156	7.03386	64.8414	1	1	1	456.085	2.65905	0.00805935
152	PUF60	8	0.245	43.8603	1	1	1	10.2666	450.295	2.6535	0.00827268
153	PRKG2	4	0.366	448.971	1	1	1	1	448.971	2.65222	0.00848398
154	QRICH1	3	0.275	243.396	1.78571	1	1	1	434.635	2.63812	0.00870086
155	KCNH7	2	0.367	1.0634	175.312	2.32451	1	1	433.351	2.63684	0.00891571
156	CAMK2A	5	0.251	1.00095	422.648	1	1	1	423.05	2.62639	0.00913408
157	SYT1	12	0.451	1	418.177	1	1	1	418.177	2.62136	0.00935272
158	NSD1	5	0.095	2.95485	79.0154	1.77058	1	1	413.393	2.61636	0.00957164
159	PHF2	9	0.177	67.5477	1	1	1	6.02204	406.775	2.60935	0.0097921
160	PSME3	17	0.174	1	7.30191	1	53.2898	1	389.117	2.59008	0.0100219
161	BAIAP2	17	0.429	2.02489	16.4206	2.72315	4.18423	1	378.859	2.57848	0.0102562
162	APBB1	11	0.321	33.9875	1.68301	6.62309	1	1	378.85	2.57847	0.0104877
163	UBR1	15	0.349	130.955	1	2.85389	1	1	373.73	2.57256	0.0107202
164	DPYSL2	8	0.274	1	308.896	1.10707	1	1	341.97	2.53399	0.0109758
165	KDM3B	5	0.06	13.5185	4.4867	1	1	5.5857	338.792	2.52993	0.0112311
166	ZNF462	9	0.085	252.889	1	1.33149	1	1	336.719	2.52727	0.0114852
167	PRR14L	22	0.277	142.019	2.33749	1	1	1	331.969	2.5211	0.0117406
168	C16orf72	16	0.289	1	326.374	1	1	1	326.374	2.51372	0.0119982
169	PTCH1	9	0.075	73.9503	1.25523	3.42415	1	1	317.844	2.50221	0.0122609
170	MRTFA	22	0.259	1	61.1393	1.03924	1	4.94377	314.118	2.49709	0.0125243
171	TLE4	9	0.15	1.21522	26.3477	1	9.77929	1	313.116	2.49571	0.0127856
172	CTNNA2	2	0.378	2.98562	32.0882	1.16267	2.79686	1	311.535	2.49351	0.0130455
173	ARHGEF2	1	0.156	6.34227	30.0299	1.56478	1	1	298.023	2.47425	0.0133165
174	RTN4RL2	11	0.423	4.85776	47.1805	1.28032	1	1	293.438	2.46752	0.0135895
175	PPP2R5D	6	0.175	33.8043	6.4011	1.34237	1	1	290.469	2.4631	0.0138627
176	ATG9B	7	1.107	1	255.028	1.13327	1	1	289.015	2.46092	0.0141344
177	PRKAR1B	7	0.538	2.82362	90.6535	1.11309	1	1	284.919	2.45472	0.0144077
178	OBSCN	1	0.873	15.3807	16.4991	1.08537	1	1	275.431	2.44001	0.0146893
179	HECTD4	12	0.127	27.6805	5.09336	1.94957	1	1	274.864	2.43912	0.0149685
180	TNKS2	10	0.481	2.18184	1	124.354	1	1	271.319	2.43348	0.0152489
181	AP3B2	15	0.342	2.49124	102.191	1.0551	1	1	268.611	2.42912	0.0155296
182	PRR12	19	0.051	97.9569	1.18787	2.25108	1	1	261.937	2.4182	0.0158159
183	CELF4	18	0.231	58.9302	4.27736	1.03643	1	1	261.249	2.41706	0.0160999
184	TLE3	15	0.073	260.34	1	1	1	1	260.34	2.41554	0.0163821
185	YWHAG	7	0.289	1	104.272	1.0527	2.36469	1	259.565	2.41425	0.0166622
186	PPP1CC	12	0.336	5.06105	48.9261	1.03463	1	1	256.193	2.40857	0.0169438
187	AHDC1	1	0.076	44.8839	1	5.65009	1	1	253.598	2.40415	0.017226
188	TOP2B	3	0.247	2.347	28.2403	3.82347	1	1	253.419	2.40384	0.0175053
189	ZBTB21	21	0.249	68.3316	1	1	1	3.66359	250.339	2.39853	0.0177859
190	NRXN3	14	0.112	6.35744	1	3.66354	10.7212	1	249.706	2.39743	0.0180645
191	PTGDR2	11	1.715	1	248.33	1	1	1	248.33	2.39503	0.018342
192	ZEB2	2	0.107	5.38994	40.4407	1.11904	1	1	243.92	2.38725	0.0186229
193	KCNQ2	20	0.158	103.665	1	2.35199	1	1	243.819	2.38707	0.018901
194	RERE	1	0.12	153.266	1	1.58096	1	1	242.308	2.38437	0.0191783
195	CDKN1C	11	0.529	1	235.315	1	1	1	235.315	2.37165	0.0194631
196	CELF1	11	0.171	1	141.208	1.55195	1	1	219.149	2.34074	0.0197709
197	TSHZ3	19	0.285	41.9774	1	1.77053	2.84801	1	211.671	2.32566	0.0200886
198	TCF12	15	0.372	8.24401	22.2402	1.14799	1	1	210.482	2.32321	0.0204053
199	CACNA1E	1	0.124	3.30763	1	63.2127	1	1	209.084	2.32032	0.0207214
200	FBXL3	13	0.288	1	208.621	1	1	1	208.621	2.31936	0.0210351
201	SLC9A3	5	0.31	1	35.4682	1.46505	3.91964	1	203.674	2.30894	0.021355
202	G3BP2	4	0.179	12.7098	13.6787	1.16359	1	1	202.295	2.30599	0.0216743
203	PPP1R9B	17	0.168	1	98.1243	2.01345	1	1	197.568	2.29572	0.0219997
204	CBX4	17	0.285	84.6387	2.2233	1.02266	1	1	192.442	2.2843	0.0223324
205	CLPTM1	19	0.326	9.27772	2.58266	1.32128	5.84932	1	185.186	2.26761	0.0226773
206	RAI1	17	0.116	126.978	1	1.43322	1	1	181.987	2.26004	0.0230262
207	TNFAIP3	6	0.196	43.0268	1	1.55432	1	2.70913	181.18	2.25811	0.0233734
208	LZTS3	20	0.228	56.6377	1	1.5763	2.00206	1	178.74	2.25222	0.023723
209	ADCY5	3	0.254	1.45486	78.2848	1.53045	1	1	174.307	2.24132	0.0240798
210	ATP4A	19	0.747	1	124.407	1.39898	1	1	174.042	2.24065	0.0244338
211	CSNK1A1	5	0.215	1	6.695	1	25.449	1	170.381	2.23142	0.0247935
212	CYLD	16	0.204	1.91803	17.4215	5.01306	1	1	167.511	2.22404	0.0251571
213	ROPN1	3	1.422	1	166.148	1	1	1	166.148	2.22049	0.0255208
214	HDAC4	2	0.052	74.4955	2.03036	1.07145	1	1	162.06	2.20968	0.0258919
215	UBN2	7	0.213	32.633	4.93381	1	1	1	161.005	2.20684	0.0262624
216	PTPRF	1	0.187	8.6722	6.69149	2.76853	1	1	160.657	2.2059	0.0266304
217	ACLY	17	0.377	1	122.156	1.30357	1	1	159.239	2.20205	0.0269989
218	RNF145	5	0.309	1.57699	87.1782	1.14346	1	1	157.202	2.19646	0.0273697
219	CNOT3	19	0.076	12.9323	11.6584	1.02109	1	1	153.95	2.18738	0.0277464
220	HIC2	22	0.178	8.30714	1	1	1	18.098	150.343	2.17708	0.0281302
221	KLHDC10	7	0.353	23.6386	1.5632	2.03571	1	1.97594	148.637	2.17213	0.0285158
222	PCGF3	4	0.338	5.57438	25.9531	1	1	1	144.672	2.16039	0.0289103
223	PRPF38B	1	0.379	26.518	3.98062	1.36349	1	1	143.927	2.15814	0.0293036
224	DEDD	1	0.329	16.3957	8.71709	1	1	1	142.923	2.1551	0.0296966
225	PHF3	6	0.286	142.576	1	1	1	1	142.576	2.15405	0.0300872
226	SMAD4	18	0.222	1	137.498	1.01102	1	1	139.014	2.14306	0.0304861
227	BCL9	1	0.381	8.51165	1	1	3.49988	4.46044	132.876	2.12345	0.030903
228	EFTUD2	17	0.094	25.9082	3.09261	1.6346	1	1	130.971	2.11717	0.0313231
229	ZNF202	11	0.419	6.57928	15.8427	1.24321	1	1	129.584	2.11255	0.0317447
230	ARID2	12	0.096	1	122.331	1.05286	1	1	128.797	2.10991	0.0321656
231	SF3B2	11	0.222	20.4786	1.30601	4.76679	1	1	127.489	2.10547	0.0325879
232	PSMA3	14	0.278	54.8373	1.86228	1.21775	1	1	124.36	2.09468	0.0330187
233	KCNJ6	21	0.51	1.13079	74.05	1.46441	1	1	122.622	2.08857	0.0334527
234	USP22	17	0.415	1.62064	74.0066	1	1	1	119.938	2.07896	0.0338942
235	TOP3B	22	0.538	1	1.37848	28.9948	2.96876	1	118.657	2.07429	0.0343373
236	SLC17A7	19	0.116	1	112.011	1.05323	1	1	117.974	2.07178	0.0347796
237	NACC1	19	0.169	27.0521	4.28127	1.00862	1	1	116.816	2.0675	0.0352231
238	RALGAPB	20	0.106	61.241	1	1.87764	1	1	114.989	2.06065	0.0356709
239	USP49	6	0.346	1	33.465	3.33677	1	1	111.665	2.04792	0.0361301
240	H3-3A	1	1.158	1	70.8376	1.5522	1	1	109.954	2.04121	0.0365934
241	CORO1A	16	0.32	1.36356	42.4006	1.89516	1	1	109.57	2.03969	0.0370548
242	AKAP9	7	0.404	108.806	1	1	1	1	108.806	2.03665	0.037516
243	FAM120A	9	0.163	1	7.65268	1.9999	1	7.02612	107.532	2.03154	0.0379795
244	RAB2A	8	0.22	8.68838	1.37349	1.08198	8.07849	1	104.307	2.01831	0.0384554
245	CTPS1	1	0.287	9.5852	10.2168	1.05631	1	1	103.444	2.01471	0.0389318
246	ZMYND11	10	0.12	81.5868	1.26665	1	1	1	103.342	2.01428	0.0394048
247	HNRNPD	4	0.227	44.9784	1	1	2.29129	1	103.059	2.01308	0.0398755
248	XPO1	2	0.051	1	6.18868	1.91563	1	8.53226	101.152	2.00497	0.0403524
249	PHIP	6	0.113	1.25201	78.5747	1.02809	1	1	101.14	2.00492	0.0408254
250	TSHZ1	18	0.241	7.0975	1	4.2724	3.33274	1	101.06	2.00458	0.0412951
251	MAPKAPK2	1	0.134	1	23.6388	1.10487	3.82675	1	99.9461	1.99977	0.041767
252	DIP2C	10	0.149	34.0293	2.36018	1.23984	1	1	99.5782	1.99816	0.0422371
253	SOX5	12	0.188	99.2057	1	1	1	1	99.2057	1.99654	0.0427055
254	SNX13	7	0.364	99.1015	1	1	1	1	99.1015	1.99608	0.0431707
255	INO80D	2	0.228	22.8551	2.70531	1.59669	1	1	98.7238	1.99442	0.0436344
256	USP48	1	0.161	12.1429	5.74178	1.40399	1	1	97.8882	1.99073	0.0440989
257	NAV3	12	0.185	97.5829	1	1	1	1	97.5829	1.98937	0.0445614
258	PTPRT	20	0.18	1.09287	1.76693	5.49028	9.03608	1	95.7991	1.98136	0.0450302
259	MRFAP1	4	1.135	1	93.2362	1	1	1	93.2362	1.96958	0.04551
260	RAB11FIP4	17	0.285	67.8674	1	1.3503	1	1	91.6415	1.96209	0.0459954
261	GIGYF2	2	0.077	7.87196	1	1	11.5825	1	91.177	1.95989	0.0464799
262	TRAF2	9	0.123	8.03942	8.02324	1.40807	1	1	90.8233	1.9582	0.0469628
263	MAPK8IP3	16	0.15	1	10.8688	1	7.97283	1	86.6547	1.93779	0.047468
264	SNRNP200	2	0.082	1	1	10.641	1	7.96153	84.7189	1.92798	0.0479821
265	SETD1B	12	0.151	3.67889	2.69633	8.50307	1	1	84.3462	1.92607	0.0484948
266	LIN54	4	0.172	1	24.8931	1.12959	2.98691	1	83.9889	1.92422	0.0490061
267	CABP1	12	0.396	1.77351	23.4844	2.01007	1	1	83.719	1.92282	0.0495153

## Sheet: Panel B - Gene Counts
Gene information				Mutation rate			De novo — ASC+SSC (Fu)						De novo — SPARK (Fu)						De novo — Our study (Japanese)			De novo — Kim et al. (Korean)			De novo — MSSNG						Inherited (Fu)						Case–control (Fu)						De novo CNV				Bayes Factors & FDR
Gene (source/input symbol)	Gene (GENCODE v33 symbol)	Chr	LOEUF	μ(PTV)	μ(MisB)	μ(MisA)	PTV (prob)	PTV (sib)	MisB (prob)	MisB (sib)	MisA (prob)	MisA (sib)	PTV (prob)	PTV (sib)	MisB (prob)	MisB (sib)	MisA (prob)	MisA (sib)	PTV	MisB	MisA	PTV	MisB	MisA	PTV (prob)	PTV (sib)	MisB (prob)	MisB (sib)	MisA (prob)	MisA (sib)	PTV (trans)	PTV (untrans)	MisB (trans)	MisB (untrans)	MisA (trans)	MisA (untrans)	PTV (case)	PTV (ctrl)	MisB (case)	MisB (ctrl)	MisA (case)	MisA (ctrl)	DEL (prob)	DEL (sib)	DUP (prob)	DUP (sib)	BF_PTV	BF_MisB	BF_MisA
SCN2A	SCN2A	2	0.127	7.83364e-06	1.59269e-05	1.9887e-05	12	0	11	0	3	1	7	0	7	0	0	0	0	0	0	2	0	0	4	0	0	0	0	0	0	0	37	26	87	60	3	0	12	7	12	12	0	0	0	0	7.28242e+30	6.86024e+20	19.41
SHANK3	SHANK3	22	0.123	4.39152e-06	6.8057e-10	1.76072e-09	7	0	0	0	0	0	8	0	0	0	0	0	0	0	0	1	0	0	0	0	0	0	0	0	1	1	0	0	0	0	2	0	0	0	0	0	13	0	2	0	2.54584e+20	1	1
CHD8	CHD8	14	0.082	1.3408e-05	1.74076e-05	1.67092e-05	12	0	5	0	3	0	8	0	3	0	0	0	0	0	0	2	0	1	5	0	0	0	0	0	1	2	36	20	111	112	2	0	10	3	10	14	0	0	0	0	1.09029e+30	2.97564e+08	25.9456
SYNGAP1	SYNGAP1	6	0.052	5.86066e-06	2.00947e-05	1.63959e-05	11	0	2	0	1	0	7	0	3	0	1	0	0	0	0	0	0	1	2	0	2	0	0	0	0	0	39	15	51	45	4	0	12	13	8	8	0	0	0	0	4.07397e+26	121800	2.09597
ADNP	ADNP	20	0.123	3.80878e-06	6.8057e-10	1.76072e-09	9	0	0	0	0	0	10	0	0	0	0	0	0	0	0	0	0	0	4	0	0	0	0	0	3	0	0	0	0	0	3	0	0	0	0	0	0	0	0	0	2.49955e+31	1	1
PTEN	PTEN	10	0.507	1.92993e-06	2.83199e-06	4.94129e-06	3	0	7	0	1	0	2	1	4	0	1	0	0	1	0	0	1	0	1	0	5	0	3	0	1	0	3	0	7	10	0	0	0	0	0	1	0	0	0	0	5864.67	4.47971e+22	79.2784
CHD2	CHD2	15	0.07	1.06089e-05	9.19712e-06	1.19403e-05	6	0	2	0	1	0	3	0	3	0	1	0	1	0	0	1	0	0	3	1	0	0	0	0	0	1	13	11	40	33	2	0	11	3	6	13	2	0	0	0	2.18061e+12	794262	1.25204
FOXP1	FOXP1	3	0.175	4.02385e-06	2.02918e-06	6.0472e-06	7	0	1	0	0	0	5	0	0	0	0	0	0	0	0	0	1	0	2	0	1	0	0	0	3	3	1	0	7	8	0	1	2	0	1	4	0	0	0	0	6726799627554791	3980.01	1
NRXN1	NRXN1	2	0.254	6.32396e-06	1.54044e-06	1.70672e-05	3	0	0	0	1	0	1	0	0	0	0	0	0	0	0	0	0	0	0	0	0	0	0	0	4	4	2	4	40	48	1	0	0	0	10	18	10	0	0	0	1037.75	1	1
POGZ	POGZ	1	0.119	6.99983e-06	1.75254e-06	2.01491e-05	6	0	0	0	1	1	6	0	1	0	0	0	0	0	0	0	0	0	1	0	0	0	1	0	0	0	1	0	51	50	5	0	2	1	12	14	0	0	0	0	2061536408807600	18.9025	1.25111
GRIN2B	GRIN2B	12	0.061	4.35567e-06	1.55629e-05	1.63805e-05	6	0	2	0	0	0	2	0	2	0	2	0	0	0	0	0	0	0	0	0	2	0	0	0	0	0	30	35	54	44	6	0	12	7	9	13	1	0	0	0	7.8478e+10	3862	2.95291
ASH1L	ASH1L	1	0.062	1.38916e-05	5.72624e-06	1.66798e-05	5	0	1	0	0	0	6	0	0	0	0	0	0	0	0	1	0	0	3	0	0	0	0	0	7	4	20	11	59	53	1	0	5	7	12	22	0	0	0	0	3.79952e+13	16.3015	1.38046
KDM5B	KDM5B	1	0.572	9.73996e-06	9.13873e-07	8.96535e-06	6	2	2	1	1	0	5	1	0	0	2	0	0	0	0	0	0	0	2	0	1	0	2	0	20	9	3	3	28	18	9	8	3	0	6	6	0	0	0	0	3.56733e+09	1177.39	26.3374
SUV420H1	KMT5B	11	0.078	3.82687e-06	3.71654e-06	4.22847e-06	6	0	1	0	0	0	5	0	0	0	0	0	0	0	0	0	0	0	0	0	0	0	0	0	3	5	2	1	21	16	1	0	0	2	3	1	0	0	0	0	2.54321e+13	1.72729	1.29535
SLC6A1	SLC6A1	3	0.15	2.413e-06	6.58611e-06	7.80554e-06	0	0	8	0	1	0	1	0	0	0	0	0	0	0	0	0	0	0	0	0	2	0	1	0	0	0	6	12	29	31	1	0	9	7	12	28	0	0	0	0	11.4494	7.1819e+11	1.19816
ASXL3	ASXL3	18	0.199	6.47036e-06	6.8057e-10	1.76072e-09	3	0	0	0	0	0	6	0	0	0	0	0	0	0	0	0	0	0	3	0	0	0	0	0	1	0	0	0	0	0	4	1	0	0	0	0	0	0	0	0	5.98109e+12	1	1
ARID1B	ARID1B	6	0.102	8.06378e-06	1.19553e-06	3.21189e-05	6	0	0	0	2	0	2	0	1	0	4	0	0	0	0	0	0	0	1	0	0	0	0	0	2	1	1	1	150	137	2	0	0	0	17	28	0	0	0	0	6.95606e+08	8.97824	31.4276
NF1	NF1	17	0.29	1.29734e-05	1.07106e-05	3.37508e-05	4	0	2	0	0	1	4	2	0	0	3	0	0	1	0	0	0	2	2	1	0	0	0	0	3	4	17	13	84	85	2	1	11	3	20	36	0	0	0	0	37706.7	47770.9	23.6436
DYRK1A	DYRK1A	21	0.214	3.38367e-06	5.29444e-06	6.14825e-06	6	0	0	0	0	0	2	0	0	0	0	1	0	0	0	0	0	0	1	0	0	0	0	0	1	2	2	4	20	10	3	0	4	2	3	7	0	0	0	0	1.70644e+10	1.76966	1.27136
MBD5	MBD5	2	0.136	4.08934e-06	6.8057e-10	1.76072e-09	5	0	0	0	0	0	2	0	0	0	0	0	0	0	0	0	0	0	0	0	0	0	0	0	1	0	0	0	0	0	1	0	0	0	0	0	2	0	0	0	5.72821e+07	1	1
GIGYF1	GIGYF1	7	0.484	6.096e-06	6.8057e-10	9.0537e-08	5	0	0	0	0	0	4	0	0	0	0	0	0	0	0	1	0	0	1	0	0	0	0	0	8	1	0	0	0	0	5	1	0	0	0	0	0	0	0	0	6.18245e+09	1	1
STXBP1	STXBP1	9	0.086	3.10528e-06	7.84652e-06	8.31955e-06	0	0	4	0	0	0	3	0	1	0	0	0	0	0	0	1	0	0	1	0	0	0	0	0	0	1	17	18	27	34	0	0	4	4	2	8	0	0	0	0	159931	11362.2	1
DYNC1H1	DYNC1H1	14	0.08	2.11151e-05	5.65029e-05	5.63968e-05	1	0	7	0	3	0	4	0	4	1	0	0	0	0	0	0	0	0	1	0	1	0	0	0	6	0	87	80	208	200	5	0	28	23	56	47	0	0	0	0	2163.15	47770.2	6.6078
RFX3	RFX3	9	0.104	4.1664e-06	4.69115e-06	7.54403e-06	2	0	1	0	0	2	2	0	0	0	1	0	0	0	0	0	0	0	0	0	2	0	0	0	1	0	6	2	14	24	2	0	6	3	3	11	0	0	0	0	13941.5	8170.25	1
RORB	RORB	9	0.112	2.23981e-06	3.93329e-06	3.13258e-06	2	0	1	0	0	0	1	0	1	0	0	0	0	0	0	0	0	0	2	0	0	0	0	0	0	0	11	7	8	4	0	0	3	2	2	3	0	0	0	0	152199	112.502	1.11575
SCN1A	SCN1A	2	0.071	9.45085e-06	7.38764e-06	2.597e-05	0	0	0	1	5	0	2	0	0	0	1	0	0	0	0	0	0	0	3	0	0	0	0	0	1	0	15	13	123	96	0	0	8	5	25	36	0	0	0	0	11802.3	12.8883	626.77
NAA15	NAA15	4	0.28	3.67897e-06	2.59178e-06	8.83262e-06	3	0	0	0	1	0	1	0	0	0	1	0	0	0	0	2	0	0	2	0	0	0	0	0	0	0	2	3	37	39	1	0	0	1	5	2	0	0	0	0	2.22387e+07	1	1.21008
MED13	MED13	17	0.03	8.2415e-06	2.75029e-06	2.75036e-06	3	0	0	0	0	0	4	0	0	0	0	0	0	0	0	0	0	0	1	0	0	0	0	0	0	0	6	4	11	4	1	0	1	0	0	2	0	0	0	0	1.91017e+07	2.29788	1.15531
DLG4	DLG4	17	0.238	4.28029e-06	1.37558e-05	7.00332e-06	3	0	1	0	0	0	3	0	0	0	1	0	0	0	0	0	0	0	0	0	0	0	0	0	2	0	30	19	44	42	1	0	13	15	5	1	0	0	0	0	726038	12.3079	1.46979
TLK2	TLK2	17	0.114	5.88679e-06	7.44903e-06	8.09777e-06	3	0	3	0	0	0	0	0	1	0	1	0	0	0	0	0	1	0	1	0	0	0	0	0	0	0	2	2	7	3	1	0	2	4	3	0	0	0	0	0	5388.65	2651.85	1.10426
EHMT1	EHMT1	9	0.072	6.44674e-06	2.40324e-06	1.79887e-05	3	0	0	0	0	0	1	0	1	0	1	0	0	0	0	0	0	0	2	0	0	0	0	0	1	1	2	2	46	55	3	0	1	3	7	17	0	0	0	0	560078	2.37225	1
CTCF	CTCF	16	0.148	2.83996e-06	6.96492e-06	5.50125e-06	0	0	1	0	0	0	2	0	1	0	0	0	0	0	0	0	0	1	3	0	0	0	0	0	0	0	0	1	12	4	0	0	2	2	1	1	1	0	0	0	219703	3.18109	1.92172
WAC	WAC	10	0.084	3.29087e-06	6.8057e-10	6.81916e-06	4	0	0	0	0	0	0	0	0	0	0	0	0	0	0	0	0	0	2	0	0	0	0	0	0	0	0	0	22	23	0	0	0	0	0	4	0	0	0	0	6.57238e+06	1	1
DEAF1	DEAF1	11	0.698	2.25137e-06	2.72226e-07	1.26239e-05	0	0	2	0	5	0	0	0	0	0	2	0	0	0	0	0	0	1	0	0	0	0	0	0	4	3	1	0	55	36	0	4	1	0	7	13	0	0	0	0	1	575.558	9945.68
SLK	SLK	10	0.348	6.15228e-06	3.79245e-06	1.03892e-05	0	0	0	0	0	0	0	0	0	0	0	0	0	0	0	0	0	0	6	0	0	0	1	0	4	3	15	12	59	61	1	1	1	1	5	15	0	0	0	0	2.5132e+06	1.7661	1.20275
KMT2C	KMT2C	7	0.122	2.04601e-05	1.4201e-05	1.33343e-05	4	0	1	0	3	0	3	0	1	0	0	0	0	0	0	1	0	1	0	0	0	1	0	0	2	0	12	6	82	91	1	0	3	3	6	10	0	0	1	0	20879.9	1.28652	25.9841
KCNB1	KCNB1	20	0.125	2.30329e-06	1.14527e-05	1.01131e-06	0	0	3	0	0	0	1	0	0	0	0	0	0	0	0	0	0	0	0	0	3	0	0	0	1	0	3	4	2	0	0	0	6	1	0	0	0	0	0	0	7.99592	570365	1.04258
KMT2A	KMT2A	11	0.065	1.72944e-05	1.62957e-05	4.22829e-05	2	0	0	0	0	0	3	0	2	0	1	0	0	0	0	0	0	1	3	0	0	0	2	0	0	2	39	34	170	145	1	1	14	11	32	39	0	0	0	0	4729.03	132.315	6.57019
MED13L	MED13L	12	0.064	8.52441e-06	4.70806e-06	1.00802e-05	5	0	0	0	0	0	1	0	0	0	2	0	0	0	0	0	0	0	1	0	0	0	0	0	1	0	6	8	28	29	0	0	4	3	7	12	0	0	0	0	882847	1.24957	3.37316
SATB2	SATB2	2	0.091	2.99339e-06	7.65024e-06	1.04729e-05	2	0	3	0	1	0	0	0	2	0	0	1	0	0	0	0	0	0	0	0	0	0	0	0	0	0	8	3	17	21	1	0	2	2	4	6	0	0	0	0	166.393	18929.9	1
ATP2B2	ATP2B2	3	0.148	4.25065e-06	1.72684e-05	1.37219e-05	0	0	2	0	0	0	0	0	4	0	1	0	1	0	0	0	0	0	0	0	0	0	0	0	4	0	46	30	49	51	0	0	10	10	10	12	0	0	0	0	21.5049	83239.9	1.23824
CUL3	CUL3	2	0.228	3.65854e-06	8.24387e-06	8.05646e-06	1	0	0	0	1	0	4	0	0	0	0	0	0	0	0	0	0	0	1	0	0	0	0	0	0	0	15	8	19	18	0	0	7	8	5	11	0	0	0	0	461114	4.47255	1.02248
KDM6B	KDM6B	17	0.14	6.72797e-06	1.08805e-05	4.33884e-06	4	0	2	0	0	0	0	0	1	0	0	0	0	0	0	0	0	0	1	0	0	0	0	0	0	0	15	20	26	42	1	0	8	5	0	1	0	0	0	0	58108.4	31.0321	1
BRSK2	BRSK2	11	0.329	2.94582e-06	6.46558e-06	1.17846e-05	2	0	0	0	0	0	3	0	1	0	0	0	0	0	0	0	0	0	1	0	1	0	0	0	6	4	12	17	48	42	1	0	0	2	1	2	1	0	0	0	238101	1	1.27707
SETD5	SETD5	3	0.227	7.26849e-06	6.8057e-10	7.65513e-06	4	0	0	0	0	1	2	0	0	0	0	0	0	0	0	0	0	0	0	0	0	0	1	0	1	1	0	0	13	8	3	0	0	0	5	3	0	0	0	0	349778	1	1.42877
ANKRD11	ANKRD11	16	0.107	8.31638e-06	1.5026e-05	1.11559e-05	3	0	0	0	0	0	1	0	0	0	1	0	0	0	0	1	0	0	1	0	0	0	0	0	0	0	9	16	43	49	2	0	5	11	8	11	1	0	0	0	90143.3	1	1.08183
AP2S1	AP2S1	19	0.502	9.58401e-07	2.83359e-06	9.95744e-07	0	0	4	0	0	0	0	0	0	0	0	0	0	0	0	0	0	0	0	0	0	0	0	0	1	0	1	0	2	0	2	0	3	0	1	0	0	0	0	0	2.85614	308110	1.07584
AUTS2	AUTS2	7	0.253	4.89351e-06	2.67218e-06	2.45226e-05	0	0	0	0	0	1	3	1	0	0	1	0	0	0	0	0	0	0	0	0	0	0	0	0	4	0	2	1	103	112	2	0	0	0	13	22	3	0	0	0	387.219	1.07637	1.23047
SMARCC2	SMARCC2	12	0.117	6.02883e-06	2.49072e-06	1.91087e-05	2	0	0	0	0	0	3	0	0	0	0	0	0	0	0	0	0	0	1	0	0	0	0	0	1	0	4	5	69	88	2	0	2	1	12	12	0	0	0	0	347018	1.41051	1
ITSN1	ITSN1	21	0.221	1.00445e-05	5.82849e-06	1.21715e-05	0	0	1	0	0	0	1	0	1	0	0	0	1	1	0	0	0	0	2	0	0	0	1	0	7	3	15	12	32	27	2	1	5	5	6	7	1	3	0	0	941.81	375.917	1.25059
ANK2	ANK2	4	0.106	1.57939e-05	3.11703e-07	3.22116e-05	4	1	0	0	3	0	2	0	0	0	0	0	0	0	0	0	0	0	0	0	0	0	0	0	6	2	0	1	168	160	7	0	0	0	23	33	0	0	0	0	44330.4	1	8.64112
SPEN	SPEN	1	0.071	1.461e-05	6.29712e-06	1.83771e-05	2	0	2	0	0	0	0	0	0	0	0	0	1	0	0	1	0	0	2	0	0	0	0	0	0	1	35	29	118	81	1	1	4	8	4	16	0	0	0	0	3188.42	34.8798	3.12698
ZNF292	ZNF292	6	0.14	8.64049e-06	6.8057e-10	1.76072e-09	3	0	0	0	0	0	1	0	0	0	0	0	1	0	0	0	0	0	2	0	0	0	0	0	4	2	0	0	0	0	0	1	0	0	0	0	0	0	0	0	134079	1	1
MEIS2	MEIS2	15	0.184	2.11636e-06	4.4402e-06	6.36e-06	0	0	0	0	0	0	2	0	0	0	0	0	0	0	0	0	0	0	0	0	2	0	0	0	1	1	7	2	17	15	0	0	3	3	6	7	1	0	0	0	84.3323	354.209	1.16275
MYT1L	MYT1L	2	0.087	4.53071e-06	1.0695e-05	1.22976e-05	1	0	2	0	0	0	2	0	0	0	0	0	0	0	0	0	0	0	1	0	2	0	0	0	0	0	4	9	32	41	1	0	2	2	9	9	0	0	0	0	3224.61	79.5413	1
DNMT3A	DNMT3A	2	1.581	3.50879e-06	5.18506e-06	1.87017e-05	2	0	1	0	6	1	0	0	0	0	3	0	0	0	0	0	0	0	0	0	0	0	2	0	0	4	3	4	25	38	1	0	0	2	4	11	0	0	0	0	3.67445	1	66624.9
SHANK2	SHANK2	11	0.458	7.68825e-06	6.8057e-10	2.76931e-05	3	0	0	0	0	1	2	0	0	0	0	0	0	0	0	0	0	1	2	0	0	0	0	0	2	3	0	0	173	174	1	0	0	0	15	24	1	0	0	0	14234.2	1	3.21302
CTNNB1	CTNNB1	3	0.129	3.78801e-06	5.25503e-06	9.81046e-06	3	0	0	0	1	0	1	0	0	0	0	0	0	0	0	0	0	0	1	0	0	0	0	0	0	0	7	6	18	22	2	0	4	6	8	9	0	0	0	0	148661	1	1.01294
TAOK1	TAOK1	17	0.274	7.21456e-06	6.75131e-06	1.28986e-05	2	0	1	0	0	0	3	0	2	0	0	0	0	0	0	0	0	0	0	0	0	0	0	0	1	1	12	12	40	45	0	0	1	6	6	7	1	0	0	0	3986.02	4.75068	1.04214
EBF3	EBF3	10	0.15	2.78552e-06	6.2792e-06	9.2189e-06	1	0	0	0	1	0	1	0	3	0	0	0	0	0	0	0	0	0	0	0	0	0	0	0	0	0	7	3	40	39	1	0	2	1	1	4	0	0	0	0	66.3011	1351	1.1061
KCNMA1	KCNMA1	10	0.276	5.24677e-06	1.42791e-05	1.46284e-05	0	0	5	0	0	0	1	0	0	0	0	1	0	0	0	0	0	0	1	0	1	0	1	0	1	0	35	28	73	78	0	0	3	9	8	17	0	0	0	0	14.6333	5438.01	1.15845
NIPBL	NIPBL	5	0.032	1.57808e-05	1.53909e-05	1.61664e-05	0	0	0	0	1	0	0	0	0	0	0	0	0	0	0	0	0	0	0	0	0	0	0	0	0	0	19	15	37	37	0	0	9	3	16	13	0	0	0	0	1	38.5006	1.39225
TRIP12	TRIP12	2	0.06	9.52723e-06	6.57747e-06	2.05068e-05	2	0	2	0	0	0	0	0	0	0	1	0	0	0	0	0	1	0	1	0	1	0	1	0	0	0	5	4	80	69	1	0	0	2	16	18	0	0	0	0	75.2329	542.817	2.00262
KCNQ3	KCNQ3	8	0.356	4.21078e-06	6.86634e-06	7.73456e-06	0	0	4	0	0	0	0	0	1	0	0	0	0	0	0	0	0	0	0	0	0	0	0	0	0	0	14	6	22	24	0	0	5	7	5	4	0	0	0	0	1	71831.4	1.08791
GABRA1	GABRA1	5	0.367	1.65044e-06	3.48842e-06	4.82919e-06	0	0	0	0	1	0	0	0	3	0	0	0	0	0	0	0	0	0	0	0	1	0	0	0	0	0	4	3	11	17	2	0	3	3	5	2	0	0	0	0	2.80797	15191	1.1806
SPAST	SPAST	2	0.224	3.00713e-06	3.34314e-06	2.07848e-06	3	0	0	0	0	0	0	0	0	0	0	0	0	0	0	0	0	0	0	0	0	0	0	0	0	0	23	9	19	21	0	0	2	1	0	2	0	0	0	0	1012.59	46.7083	1.01563
TBR1	TBR1	2	0.194	1.87433e-06	6.8057e-10	1.76072e-09	1	0	0	0	0	0	1	0	0	0	0	0	0	0	0	0	0	0	2	0	0	0	0	0	0	1	0	0	0	0	2	1	0	0	0	0	0	0	0	0	8705.81	1	1
CREBBP	CREBBP	16	0.066	1.13686e-05	4.7661e-06	3.05875e-05	1	0	1	0	4	0	1	0	0	1	1	1	0	0	0	1	0	0	0	0	0	0	0	0	0	0	4	2	79	81	2	2	3	3	9	10	1	0	0	0	13.9318	6.82193	18.6917
IRF2BPL	IRF2BPL	14	0.405	1.45708e-06	1.77655e-06	1.35546e-05	3	0	0	0	0	0	2	0	0	0	0	0	0	0	0	0	0	0	0	0	0	0	0	0	0	0	4	7	46	56	0	0	0	1	1	1	0	0	0	0	19979.1	1	1
ZBTB20	ZBTB20	3	0.317	1.92926e-06	1.39518e-05	7.79072e-06	2	0	0	0	0	0	0	0	0	0	0	0	0	0	0	0	0	0	0	0	1	0	0	0	0	2	25	20	38	39	1	0	11	7	5	2	0	0	0	0	52.5419	74.66	1.26543
SKI	SKI	1	0.194	2.05606e-06	8.05559e-06	6.85783e-06	3	0	0	0	0	0	1	0	1	0	0	0	0	0	0	0	0	0	0	0	0	0	0	0	1	0	15	15	24	14	1	2	0	0	0	0	0	0	0	0	8467.53	1.33798	1.31483
TCF20	TCF20	22	0.095	6.17137e-06	6.8057e-10	1.76072e-09	2	0	0	0	0	0	2	0	0	0	0	0	0	0	0	0	0	0	1	0	0	0	0	0	0	0	0	0	0	0	1	0	0	0	0	0	0	0	0	0	13717.5	1	1
SMC3	SMC3	10	0.037	7.605e-06	1.02291e-05	1.25935e-05	0	0	1	0	0	0	0	0	1	0	0	0	0	0	0	0	1	0	0	0	2	0	0	0	1	0	4	9	11	21	1	1	9	2	4	14	0	0	0	0	1	12632.2	1
CSNK2A1	CSNK2A1	20	0.297	3.58919e-06	5.08736e-06	1.61927e-06	0	0	2	0	0	0	1	0	1	0	0	0	0	0	0	0	0	0	0	0	1	0	0	0	0	0	4	3	3	2	1	0	2	1	0	1	0	0	0	0	6.36855	1941.11	1
BRD4	BRD4	19	0.048	5.34258e-06	7.68039e-07	1.6614e-05	1	0	0	0	2	0	0	0	0	0	0	0	0	0	0	0	0	0	0	0	0	0	2	0	0	0	0	1	47	41	0	0	0	0	9	17	0	0	0	0	3.87786	1	8.18053
PHF21A	PHF21A	11	0.08	3.21684e-06	3.27426e-06	6.57569e-06	2	0	0	0	0	0	2	0	0	0	0	0	0	0	0	0	0	0	0	0	0	0	0	0	0	0	3	7	19	13	0	0	1	2	3	5	0	0	0	0	10299	1	1.18622
CAPRIN1	CAPRIN1	11	0.311	4.10224e-06	1.87283e-06	3.98044e-06	1	0	0	0	0	0	2	0	0	0	0	0	0	0	0	1	0	0	1	0	0	0	0	0	7	1	4	5	3	3	0	0	0	1	0	2	0	0	0	0	12071.9	1	1
PACS1	PACS1	11	0.185	3.97578e-06	5.15432e-06	1.69694e-05	0	0	3	0	0	0	0	0	1	0	0	0	0	0	0	0	0	0	0	0	1	0	1	0	2	0	6	6	43	61	0	0	2	3	7	5	0	0	0	0	1.19448	10034	1
UBR5	UBR5	8	0.073	1.68957e-05	1.02587e-05	4.44428e-05	4	0	0	0	4	0	0	1	0	0	0	0	0	0	0	0	0	0	2	0	1	0	1	0	1	0	16	22	115	101	0	1	5	7	24	45	0	0	0	0	1052.48	1	9.8729
MED23	MED23	6	0.501	6.76432e-06	1.15413e-05	7.45089e-06	0	0	1	0	2	0	0	0	0	0	0	1	0	0	0	0	0	0	0	0	0	0	1	0	7	9	30	17	39	45	0	3	16	11	5	5	0	0	0	0	1	1610.83	5.55887
TBL1XR1	TBL1XR1	3	0.106	2.40848e-06	3.97063e-06	5.32158e-06	0	0	1	0	0	0	0	0	2	0	1	0	0	0	0	0	0	0	1	0	0	0	0	0	0	0	2	0	18	9	1	0	0	0	1	1	0	0	0	0	15.4235	402.848	1.42536
PRDM15	PRDM15	21	0.455	6.1501e-06	6.8057e-10	2.33989e-05	0	0	0	0	0	0	0	0	0	0	0	1	0	0	0	0	0	0	0	0	0	0	0	0	13	7	0	0	84	72	4	0	0	0	9	17	0	0	2	0	14.6511	1	1.63998
TANC2	TANC2	17	0.158	9.17917e-06	6.8057e-10	1.17252e-05	2	0	0	0	0	0	1	0	0	0	0	0	0	0	0	2	0	0	0	0	0	0	0	0	1	1	0	0	30	30	2	0	0	0	4	13	0	0	0	0	8030.4	1	1
TCF4	TCF4	18	0.217	3.74195e-06	6.22769e-06	6.75233e-06	2	0	0	0	0	0	1	0	1	0	0	0	0	0	0	0	0	0	0	0	1	0	0	0	0	1	29	33	14	19	0	0	4	5	4	5	1	0	0	0	170.745	4.97799	1
DSCAM	DSCAM	21	0.189	8.75573e-06	6.8057e-10	3.7514e-05	4	0	0	0	0	1	0	0	0	0	3	2	0	0	0	0	0	0	0	0	0	0	0	0	1	3	0	0	176	152	1	0	0	0	23	45	0	0	0	0	1695.15	1	3.91352
VEZF1	VEZF1	17	0.24	1.80917e-06	1.76236e-06	5.29275e-06	0	0	1	0	0	0	0	0	2	0	0	0	0	0	0	0	0	0	0	0	0	0	1	0	0	0	0	0	6	15	3	0	0	0	0	8	0	0	0	0	5.61361	1163.81	1
CDK13	CDK13	7	0.324	5.49249e-06	9.45083e-06	1.0333e-05	0	0	3	0	0	0	1	0	0	0	0	0	0	0	0	1	0	0	0	0	0	0	0	0	0	0	12	10	35	30	1	0	1	1	0	1	0	0	0	0	27.1681	189.216	1.15553
NR4A2	NR4A2	2	0.133	1.86896e-06	3.0034e-06	6.79151e-06	0	0	0	0	0	0	1	0	0	0	0	0	0	0	0	0	1	0	0	0	0	0	0	0	0	0	1	3	12	15	0	1	1	0	5	5	0	0	1	0	4.58837	11.1761	1.00039
TCF7L2	TCF7L2	10	0.273	2.99138e-06	6.60256e-06	3.73673e-06	2	0	0	0	0	0	1	0	1	0	0	0	0	0	0	0	0	0	0	0	0	0	0	0	4	2	8	8	7	3	0	2	4	2	0	3	1	0	0	0	125.955	6.3273	1.02486
CASZ1	CASZ1	1	0.152	4.90457e-06	6.8057e-10	1.76072e-09	0	0	0	0	0	0	2	0	0	0	0	0	0	0	0	0	0	0	2	0	0	0	0	0	0	0	0	0	0	0	0	0	0	0	0	0	0	0	0	0	4461.39	1	1
CHD3	CHD3	17	0.147	1.16927e-05	1.62346e-05	2.59334e-05	0	0	1	0	1	1	1	0	2	0	2	0	0	0	0	0	0	0	0	0	1	0	0	0	1	1	35	21	78	101	1	2	14	9	14	27	0	0	0	0	1	4272.93	1
DLL1	DLL1	6	0.095	2.60546e-06	4.15496e-06	6.28356e-06	1	0	0	0	0	0	0	0	1	0	0	0	0	0	0	0	0	0	0	0	0	0	0	0	0	1	8	13	23	22	1	0	1	3	2	0	0	0	0	0	7.92865	1	1.14226
CASKIN1	CASKIN1	16	0.164	4.44713e-06	6.22858e-06	1.01387e-05	0	0	0	0	0	0	0	0	3	0	0	1	0	0	0	0	0	0	0	0	0	0	0	0	2	1	19	15	48	47	0	0	6	5	0	4	0	0	0	0	1	3284.72	1.10777
SRPR	SRPRA	11	0.39	2.02708e-06	6.8057e-10	1.09586e-05	2	0	0	0	2	0	0	0	0	0	0	0	0	0	0	0	0	0	0	0	0	0	0	0	3	0	0	0	56	52	2	0	0	0	12	18	1	0	0	0	158.936	1	4.63653
MLXIP	MLXIP	12	0.294	2.5589e-06	6.8057e-10	1.39288e-05	2	0	0	0	0	1	0	0	0	0	0	0	0	0	0	0	0	0	1	0	0	0	0	0	0	0	0	0	46	45	1	0	0	0	5	16	1	0	0	0	473.568	1	1.02563
PLXNA1	PLXNA1	3	0.262	7.84537e-06	1.30528e-05	3.30835e-05	0	0	1	0	1	0	0	0	1	0	0	0	0	0	0	0	0	0	0	0	0	0	1	0	5	3	44	13	171	160	2	0	5	9	14	39	0	0	1	0	2.12457	146.484	2.00354
PSMD11	PSMD11	17	0.159	3.00981e-06	1.46766e-06	4.84589e-06	0	0	1	0	0	0	0	0	1	0	0	0	0	0	0	0	0	0	0	0	1	0	0	0	0	0	0	2	19	18	2	0	1	0	2	3	0	0	0	0	2.97857	932.741	1.09176
PBX1	PBX1	1	0.255	2.32188e-06	5.54825e-06	1.54019e-06	1	0	1	0	0	0	1	0	1	0	0	0	0	0	0	0	0	0	0	0	1	0	0	0	0	0	2	1	3	2	1	0	1	1	1	0	0	0	0	0	52.0394	52.8529	1.05054
ATP1A3	ATP1A3	19	0.062	3.99236e-06	1.93849e-05	7.97009e-06	0	0	2	0	1	0	0	0	1	0	0	0	0	0	0	0	0	0	0	0	2	0	1	0	1	1	43	33	34	30	0	1	13	11	4	9	0	0	0	0	1	1880.5	1.39261
PIK3CA	PIK3CA	3	0.117	7.2164e-06	8.19608e-06	9.29858e-06	0	0	0	0	0	0	0	0	1	0	0	0	0	0	0	0	0	0	0	0	1	1	0	0	0	0	5	5	19	16	0	1	7	1	2	5	0	0	0	0	1	41.3452	1.02841
KIF1B	KIF1B	1	0.171	1.08327e-05	6.61827e-06	2.58144e-05	0	0	3	0	0	1	0	0	1	1	0	0	0	0	0	0	0	0	1	0	0	0	0	0	1	0	28	36	123	120	2	1	6	4	19	30	0	0	0	0	2.22934	473.973	1.96912
CACNA1D	CACNA1D	3	0.214	1.16275e-05	1.25403e-05	2.77144e-05	0	0	0	0	2	0	0	0	2	0	1	0	0	0	0	0	0	0	1	0	2	0	0	0	0	0	74	61	151	157	0	1	7	12	22	19	0	0	0	0	1	748.238	2.68618
PAX5	PAX5	9	0.165	1.28782e-06	3.65938e-06	5.5383e-06	2	0	0	0	0	0	0	0	1	0	0	0	0	0	0	0	0	0	0	0	0	0	0	0	0	0	0	2	20	15	0	0	5	3	1	0	0	0	0	0	131.193	12.2421	1.19324
CSNK1E	CSNK1E	22	0.143	1.8827e-06	6.57911e-06	4.66101e-06	0	0	0	0	2	0	0	0	0	0	1	0	0	0	0	0	0	0	0	0	2	1	0	0	3	0	10	3	17	27	0	0	5	3	1	2	0	0	0	0	1.72891	87.9418	5.66634
CYFIP2	CYFIP2	5	0.092	6.17539e-06	1.10309e-05	1.80197e-05	0	0	0	0	1	0	1	0	3	0	1	0	0	0	0	0	1	0	0	0	0	0	0	0	0	0	18	13	37	33	2	0	3	8	4	9	0	0	0	0	8.48774	208.083	1.0317
ATXN2	ATXN2	12	0.333	4.4756e-06	6.8057e-10	1.64245e-05	0	0	0	0	0	1	0	0	0	0	0	0	0	0	0	2	0	0	0	0	0	0	0	0	7	3	0	0	72	59	1	0	0	0	13	26	1	0	0	0	182.151	1	1.7064
AGO4	AGO4	1	0.218	4.69369e-06	3.60124e-06	1.16406e-05	0	0	1	0	1	0	0	0	1	0	0	0	0	1	0	0	0	0	0	0	0	0	0	0	1	1	12	10	23	28	1	0	2	0	5	4	0	0	0	0	1.06024	1594.25	1
TAF4	TAF4	20	0.081	3.05001e-06	9.17394e-07	1.87776e-05	1	0	0	0	1	0	0	0	0	0	2	0	0	0	0	0	0	0	1	0	0	0	1	0	2	0	3	0	38	40	0	0	0	1	9	13	1	0	0	0	73.9264	1.13039	1.71116
NCKAP1	NCKAP1	2	0.044	5.8903e-06	3.40476e-06	1.32186e-05	1	0	0	0	1	0	0	0	1	0	1	0	0	0	0	0	0	0	1	0	0	0	0	0	0	0	3	4	30	36	0	0	2	1	4	11	1	0	0	0	19.8969	6.41421	1
KIF5C	KIF5C	2	0.117	4.66873e-06	3.5468e-06	1.02566e-05	0	0	0	0	0	0	0	0	1	0	0	1	0	0	0	0	0	0	0	0	2	0	0	0	3	2	7	5	32	29	0	1	1	0	3	4	0	0	0	0	1	1345.33	1.15473
SIN3A	SIN3A	15	0.07	6.34691e-06	3.91448e-06	1.52454e-05	1	0	1	0	0	0	0	0	0	0	0	0	0	0	0	0	0	0	0	0	1	0	0	0	0	0	4	0	57	48	1	0	5	4	11	20	0	0	0	0	4.11456	242.679	1.47921
ITPR3	ITPR3	6	0.569	1.035e-05	3.86298e-06	4.34298e-05	0	0	0	0	4	0	0	0	0	0	1	1	0	0	0	0	0	0	0	0	0	0	0	0	27	13	11	6	218	197	4	6	4	3	32	41	0	0	0	0	6.04701	7.11161	33.2907
SMARCA2	SMARCA2	9	0.203	8.25825e-06	1.35233e-05	1.46078e-05	0	0	2	0	0	0	0	0	0	0	0	0	0	0	0	0	0	0	0	0	1	0	0	0	2	1	12	9	34	37	1	0	4	1	4	8	1	0	0	0	1	77.2812	1
GRIA2	GRIA2	4	0.247	3.33007e-06	6.45266e-06	7.43751e-06	1	0	1	0	1	0	1	0	0	0	0	0	0	0	0	0	0	0	0	0	0	0	2	0	1	0	18	14	13	12	1	0	2	2	3	5	0	0	0	0	36.6972	6.23619	5.96217
MEF2C	MEF2C	5	0.608	2.08537e-06	7.29432e-06	3.10647e-06	0	0	1	0	0	0	1	0	2	1	0	0	0	0	0	0	0	0	0	0	0	0	0	0	1	0	12	3	6	3	3	0	5	4	0	0	0	0	0	0	7.40999	166.183	1.06237
PHF12	PHF12	17	0.135	4.42049e-06	2.90309e-06	5.17678e-06	2	0	0	0	0	0	1	0	0	1	0	0	0	0	0	0	0	0	1	0	0	0	0	0	1	2	6	9	31	33	0	0	1	2	2	3	0	0	0	0	1172.85	1	1.09985
ACVR2A	ACVR2A	2	0.17	2.30245e-06	1.80333e-06	5.65703e-06	0	0	0	0	0	0	0	0	1	0	0	0	0	0	0	0	0	0	0	0	0	0	0	0	1	1	1	0	13	17	0	0	0	0	4	12	2	0	0	0	1	8.9967	1
SMARCA4	SMARCA4	19	0.055	8.40532e-06	2.69363e-05	1.35066e-05	0	0	2	0	0	1	0	0	0	0	0	0	0	0	0	0	0	0	0	0	3	0	0	0	1	2	22	16	49	34	1	1	11	7	6	10	0	0	0	0	1	792.27	1.59905
EP300	EP300	22	0.099	1.18965e-05	6.8057e-10	1.76072e-09	1	0	0	0	0	0	2	0	0	0	0	0	0	0	0	0	0	0	2	0	0	0	0	0	1	0	0	0	0	0	1	2	0	0	0	0	1	0	0	0	111.393	1	1
ZMYM2	ZMYM2	13	0.332	6.62211e-06	1.65417e-06	9.3359e-06	2	0	0	0	0	0	1	0	0	0	1	0	0	0	0	0	0	0	1	0	0	0	0	0	0	1	1	1	14	28	1	1	4	0	2	10	0	0	0	0	102.724	11.1227	1
TSC1	TSC1	9	0.118	4.70491e-06	6.8057e-10	1.38184e-05	0	0	0	0	0	0	3	0	0	0	1	0	0	0	0	0	0	0	0	0	0	0	0	0	2	1	0	0	77	74	1	1	0	0	2	11	0	0	0	0	867.932	1	1.26668
ZMYND8	ZMYND8	20	0.131	4.77274e-06	5.09406e-06	1.43595e-05	2	0	0	0	0	0	1	0	0	0	0	0	0	0	0	0	0	0	1	0	0	0	1	0	0	2	10	8	30	28	1	1	1	4	13	9	0	0	0	0	680.797	1	1.368
PRH1	PRH1	12	1.361	4.77492e-07	3.64147e-07	3.14511e-06	4	0	0	0	0	0	0	0	0	0	0	0	0	0	0	0	0	0	0	0	0	0	0	0	0	0	0	0	0	0	0	0	0	0	0	2	0	0	0	0	908.601	1	1
CGREF1	CGREF1	2	1.872	5.58412e-07	6.8057e-10	1.76072e-09	4	0	0	0	0	0	0	0	0	0	0	0	0	0	0	0	0	0	0	0	0	0	0	0	1	0	0	0	0	0	1	3	0	0	0	0	0	0	0	0	886.256	1	1
TNPO3	TNPO3	7	0.515	5.94726e-06	2.86259e-06	1.01516e-05	0	0	0	0	1	1	1	0	2	0	1	0	0	0	0	1	0	0	0	0	0	0	0	0	2	3	6	2	24	23	1	2	2	2	7	9	0	0	0	0	3.31802	236.399	1.12434
HNRNPU	HNRNPU	1	0.114	3.67394e-06	7.16722e-07	1.29847e-05	0	0	0	0	1	0	1	0	0	0	0	0	0	0	0	0	0	0	0	0	0	0	0	0	2	1	0	0	25	22	0	0	1	0	3	0	0	0	0	0	5.52693	1.83731	1.11878
HNRNPUL2	HNRNPUL2	11	0.227	4.90021e-06	6.8057e-10	1.31982e-05	0	0	0	0	0	0	3	0	0	0	0	0	0	0	0	0	0	0	0	0	0	0	0	0	0	0	0	0	53	41	0	0	0	0	4	10	0	0	0	0	591.627	1	1.4444
CELF2	CELF2	10	0.174	2.05389e-06	6.41083e-06	5.9884e-06	1	0	0	0	0	0	1	0	1	0	0	0	0	0	0	0	0	0	1	0	0	0	0	0	0	1	4	3	25	34	0	0	3	5	3	3	0	0	0	0	308.679	1.00939	1
PSMD12	PSMD12	17	0.162	2.87463e-06	4.03402e-07	6.09929e-06	1	0	0	0	1	0	1	0	0	0	0	1	0	0	0	1	0	0	0	0	0	0	0	0	1	0	1	0	24	33	0	0	0	0	1	2	0	0	0	0	440.723	1.23413	1
CAMTA2	CAMTA2	17	0.262	6.56382e-06	2.87229e-06	4.05794e-06	0	0	0	0	0	0	0	0	2	0	0	0	0	0	0	0	0	0	0	0	0	0	0	0	3	1	7	7	12	22	3	0	3	2	2	3	0	0	0	0	4.35633	186.563	1
NAA25	NAA25	12	0.108	5.43219e-06	2.22625e-06	9.84212e-06	0	0	0	0	0	0	0	0	1	0	0	0	0	0	0	1	0	0	0	0	0	0	0	0	1	1	7	1	28	21	0	0	2	0	3	11	0	0	0	0	8.52399	82.7197	1.11493
TRIM23	TRIM23	5	0.58	3.39857e-06	4.01854e-07	8.0952e-06	0	0	1	0	1	0	0	0	0	0	0	0	0	0	0	0	0	0	1	0	1	0	0	0	1	2	0	0	11	17	3	1	0	0	2	12	0	0	0	0	4.64122	166.035	1
MYO18A	MYO18A	17	0.287	8.88202e-06	2.72656e-06	1.50484e-05	1	1	0	0	0	0	1	0	0	0	0	0	0	0	0	0	0	0	0	0	0	0	0	0	10	5	8	12	92	83	1	1	8	2	7	22	1	0	0	0	3.12196	22.7808	1.57069
BTBD10	BTBD10	11	0.612	3.01115e-06	3.43936e-06	3.11946e-06	0	0	2	0	0	0	0	0	0	0	0	0	0	0	0	0	0	0	0	0	1	0	0	0	0	0	0	1	9	3	1	0	1	1	1	0	0	0	0	0	1.37262	437.633	1.18246
PAPOLG	PAPOLG	2	0.266	4.0004e-06	1.02883e-06	5.4876e-06	0	0	0	0	2	0	0	0	1	0	0	0	0	0	0	0	0	1	0	0	0	0	2	0	2	0	1	0	10	14	0	0	0	0	0	3	0	0	0	0	1.18753	11.9585	48.8724
BAZ1B	BAZ1B	7	0.109	6.9139e-06	2.91151e-06	1.79902e-05	1	0	0	0	1	0	0	0	0	0	0	0	0	0	0	0	0	0	0	0	2	0	0	1	0	1	4	4	41	33	1	0	2	1	15	15	0	0	0	0	1.84052	243.108	1.54159
NOTCH1	NOTCH1	9	0.097	8.53061e-06	4.50442e-06	5.03338e-05	1	0	0	0	0	0	0	0	1	0	1	0	1	0	0	0	0	0	0	0	0	0	0	0	0	1	17	21	228	227	0	0	5	0	9	22	0	0	0	0	12.2995	29.5623	1.88966
HSP90AB1	HSP90AB1	6	0.213	2.53829e-06	2.8967e-07	1.12121e-05	1	0	0	0	0	0	0	0	0	0	0	0	1	0	0	0	0	0	1	0	0	0	0	0	0	0	0	0	15	15	1	0	0	0	8	13	0	0	0	0	678.303	1	1
FBXO11	FBXO11	2	0.097	4.27041e-06	6.68065e-06	3.9897e-06	1	0	1	0	0	0	0	1	0	0	0	0	0	0	0	0	0	0	0	0	1	0	0	0	0	0	7	6	19	25	0	0	3	1	3	1	0	0	0	0	4.91386	39.9461	1.01681
ATG13	ATG13	11	0.328	1.98621e-06	2.85838e-06	1.27538e-06	0	0	0	0	0	0	0	0	0	0	0	0	0	0	0	0	0	0	1	0	0	0	0	0	3	2	37	30	6	12	0	1	6	1	4	1	0	0	0	0	3.85328	167.622	1.01291
STRIP1	STRIP1	1	0.55	3.92871e-06	2.09439e-06	1.00049e-05	1	0	0	0	0	0	0	0	0	0	0	0	0	0	0	0	1	0	0	0	0	0	0	0	2	4	7	4	50	35	1	0	3	0	11	9	0	0	0	0	1.97967	156.006	2.0534
DIP2A	DIP2A	21	0.354	5.9506e-06	4.67734e-07	1.64167e-05	2	0	0	0	1	0	0	0	0	0	0	0	0	0	0	0	0	0	0	0	0	0	1	0	9	5	4	1	95	96	2	3	1	1	17	26	1	0	0	0	28.0262	2.32276	1.68443
PDS5B	PDS5B	13	0.18	7.46447e-06	3.83784e-06	1.17487e-05	0	0	0	0	0	0	0	0	0	0	0	0	0	0	0	0	0	0	1	0	0	0	0	0	9	1	3	2	24	36	1	1	1	1	6	14	1	0	0	0	12.3615	1	1
KCNG3	KCNG3	2	0.638	1.01093e-06	6.93204e-06	7.17438e-06	0	0	0	0	0	0	0	0	1	0	1	0	0	0	0	0	0	0	0	0	2	0	0	0	2	2	5	5	18	12	0	0	3	0	0	2	0	0	0	0	1.00413	510.576	1.11209
INTS3	INTS3	1	0.251	6.34641e-06	1.00293e-05	1.09022e-05	0	0	0	0	0	0	0	0	0	0	0	0	0	0	0	0	0	0	0	0	0	0	0	0	1	1	24	7	47	48	0	1	9	6	12	8	0	0	0	0	1	357.67	1.48447
CLEC16A	CLEC16A	16	0.384	3.94814e-06	1.25187e-06	5.18004e-06	0	0	0	0	0	0	0	0	0	0	0	0	0	0	0	2	0	0	0	0	0	0	0	0	1	0	0	1	23	17	3	0	3	2	3	6	0	0	0	0	225.631	1.86779	1.22723
SYNCRIP	SYNCRIP	6	0.209	2.646e-06	3.22703e-06	6.86575e-06	0	0	0	0	0	0	2	0	0	0	0	0	0	0	0	0	0	0	0	0	0	0	0	0	2	0	1	0	13	10	1	0	1	0	3	4	0	0	1	1	156.199	1.62143	1.08178
EIF4G2	EIF4G2	11	0.085	5.53236e-06	1.08143e-06	4.58805e-06	0	0	0	0	0	0	1	0	0	0	0	0	0	0	0	0	0	0	2	0	0	0	0	0	0	0	0	0	0	0	1	0	0	0	0	0	0	0	0	0	488.099	1	1
GABBR2	GABBR2	9	0.167	4.00375e-06	8.56547e-06	1.6313e-05	0	0	0	0	3	0	0	0	3	0	1	0	0	0	0	0	0	0	0	0	0	0	1	0	2	0	14	12	46	45	0	0	0	3	1	4	0	0	0	0	1.19303	37.215	10.6893
ANKH	ANKH	5	0.499	1.52675e-06	4.29971e-06	4.91859e-06	0	0	0	0	0	0	0	0	0	0	0	0	0	0	0	0	0	0	0	0	0	0	1	0	1	2	8	10	9	14	1	0	11	1	1	5	0	0	0	0	1.24885	331.185	1.11562
MARK2	MARK2	11	0.156	4.10023e-06	7.64607e-06	9.31441e-06	0	0	1	0	0	0	1	0	1	0	0	0	0	0	0	0	0	0	1	1	0	0	0	0	2	1	10	4	22	36	1	0	6	4	6	9	0	0	0	0	7.03386	64.8414	1
PUF60	PUF60	8	0.245	1.97935e-06	5.50588e-06	7.63287e-06	0	0	1	0	0	0	1	0	0	0	1	0	0	0	0	0	0	0	1	0	0	0	0	0	0	0	1	3	6	9	0	0	0	1	0	5	0	0	0	0	43.8603	1	1
PRKG2	PRKG2	4	0.366	3.68952e-06	1.93255e-07	9.41072e-06	0	0	0	0	0	0	0	0	0	0	0	0	0	0	0	0	0	0	3	0	0	0	0	0	3	3	0	0	39	42	0	0	0	0	1	7	0	0	0	0	448.971	1	1
QRICH1	QRICH1	3	0.275	3.14247e-06	1.19667e-06	1.09307e-05	1	0	0	0	0	0	1	0	0	0	0	0	0	0	0	0	0	0	1	0	0	0	0	0	0	1	0	0	19	16	2	0	1	0	3	10	0	0	0	0	243.396	1.78571	1
KCNH7	KCNH7	2	0.367	5.73855e-06	6.72275e-06	5.79262e-06	0	0	1	0	0	0	0	0	2	0	1	0	0	0	0	0	0	1	0	0	0	0	0	0	2	0	10	6	20	16	0	0	3	3	6	3	0	0	0	0	1.0634	175.312	2.32451
CAMK2A	CAMK2A	5	0.251	3.31784e-06	8.69011e-06	3.50413e-06	0	0	3	0	0	0	0	0	0	0	0	0	0	0	0	0	0	0	0	0	1	0	0	0	1	0	6	4	10	11	0	0	2	4	0	2	0	0	0	0	1.00095	422.648	1
SYT1	SYT1	12	0.451	1.85222e-06	3.23633e-06	2.27328e-06	0	0	1	0	0	0	0	0	2	0	0	0	0	0	0	0	0	0	0	0	0	0	0	0	0	0	4	6	4	5	0	0	1	0	1	1	0	0	0	0	1	418.177	1
NSD1	NSD1	5	0.095	1.13493e-05	1.00019e-05	7.42814e-06	0	0	2	0	0	1	0	0	0	1	0	0	0	0	1	0	0	0	1	0	0	0	0	0	0	2	10	8	15	15	3	0	4	1	5	4	0	0	0	0	2.95485	79.0154	1.77058
PHF2	PHF2	9	0.177	4.24244e-06	3.82508e-07	2.32821e-06	2	0	0	0	0	0	0	0	0	0	0	0	0	0	0	0	0	0	0	0	0	0	0	0	3	1	0	0	4	8	0	0	0	0	0	0	0	0	0	0	67.5477	1	1
PSME3	PSME3	17	0.174	1.35221e-06	1.71461e-06	1.70706e-06	0	0	0	0	0	0	0	0	0	0	0	0	0	0	0	0	0	0	0	0	0	0	0	0	0	1	4	1	1	1	0	0	3	1	1	2	0	0	0	0	1	7.30191	1
BAIAP2	BAIAP2	17	0.429	1.96427e-06	1.24992e-06	1.01802e-05	0	0	0	0	0	0	0	0	0	0	2	0	0	0	0	0	1	0	0	0	0	0	0	0	2	0	3	2	19	24	1	0	0	0	1	2	1	0	0	0	2.02489	16.4206	2.72315
APBB1	APBB1	11	0.321	2.66174e-06	1.04366e-06	7.28476e-06	1	0	0	0	2	0	1	0	0	0	0	0	0	0	0	0	0	0	0	0	0	0	0	0	1	0	2	0	49	39	1	0	1	1	2	3	0	0	0	0	33.9875	1.68301	6.62309
UBR1	UBR1	15	0.349	8.89241e-06	6.8057e-10	9.0965e-06	0	0	0	0	0	0	0	0	0	0	1	0	0	0	0	0	0	0	0	0	0	0	1	0	13	4	0	0	67	51	7	0	0	0	11	4	0	0	0	0	130.955	1	2.85389
DPYSL2	DPYSL2	8	0.274	2.3254e-06	5.90323e-06	7.69776e-06	0	0	3	0	1	0	0	0	0	0	0	0	0	0	0	0	0	0	0	0	0	0	0	0	0	0	7	7	28	29	0	0	4	6	5	7	0	0	0	0	1	308.896	1.10707
KDM3B	KDM3B	5	0.06	8.04971e-06	5.64228e-06	1.79864e-05	0	0	0	0	0	0	2	0	0	0	1	0	0	0	0	0	0	0	0	0	0	0	0	0	0	1	8	6	55	70	0	0	4	2	11	23	0	0	0	0	13.5185	4.4867	1
ZNF462	ZNF462	9	0.085	9.28285e-06	4.73249e-06	1.96017e-05	2	0	1	0	0	0	2	0	0	0	0	0	0	0	1	0	0	0	0	0	0	0	1	0	1	1	14	9	92	107	0	0	2	10	8	25	0	0	0	0	252.889	1	1.33149
PRR14L	PRR14L	22	0.277	5.92414e-06	2.48163e-06	5.1622e-07	1	0	0	0	0	0	0	0	0	0	0	0	0	0	0	0	0	0	2	0	0	0	0	0	0	0	9	5	1	3	0	0	0	0	0	0	0	0	0	0	142.019	2.33749	1
C16orf72	C16orf72	16	0.289	2.02641e-06	2.28139e-06	3.92451e-06	0	0	0	0	0	1	0	0	2	0	0	0	0	0	0	0	0	0	0	0	0	0	0	0	0	0	6	1	9	15	0	0	1	1	1	1	0	0	0	0	1	326.374	1
PTCH1	PTCH1	9	0.075	5.3925e-06	1.46611e-07	2.14936e-05	0	0	0	0	1	1	0	0	0	0	0	1	0	0	0	0	0	0	2	0	0	0	0	0	2	1	1	0	132	113	1	1	0	0	15	13	0	0	0	0	73.9503	1.25523	3.42415
MKL1	MRTFA	22	0.259	3.20009e-06	1.57976e-06	5.44387e-07	0	0	1	0	0	0	0	0	0	0	0	0	0	0	0	0	0	0	0	0	0	0	0	0	1	1	16	8	1	0	0	1	0	0	1	1	0	0	1	0	1	61.1393	1.03924
TLE4	TLE4	9	0.15	3.58684e-06	7.3283e-06	5.26797e-06	0	0	1	0	0	0	0	0	0	0	0	0	0	0	0	0	0	0	0	0	0	0	0	0	1	1	14	9	13	15	1	0	8	7	1	2	1	0	0	0	1.21522	26.3477	1
CTNNA2	CTNNA2	2	0.378	4.40592e-06	3.38993e-06	1.38715e-05	0	0	0	0	1	0	1	0	0	0	0	0	0	0	0	0	0	0	0	0	0	0	1	0	1	0	31	17	34	26	1	1	2	2	4	10	0	0	0	0	2.98562	32.0882	1.16267
ARHGEF2	ARHGEF2	1	0.156	6.55093e-06	9.63597e-06	1.43408e-05	0	0	1	0	1	0	0	0	0	0	1	0	0	0	0	0	0	0	1	0	1	0	0	0	2	0	34	25	39	35	1	0	7	9	14	9	0	0	0	0	6.34227	30.0299	1.56478
RTN4RL2	RTN4RL2	11	0.423	9.60914e-07	6.58899e-06	9.25136e-06	1	0	0	0	0	0	0	0	0	0	0	0	0	0	0	0	0	0	0	0	1	0	0	0	1	0	21	16	24	14	0	0	4	2	1	0	0	0	0	0	4.85776	47.1805	1.28032
PPP2R5D	PPP2R5D	6	0.175	3.22605e-06	6.35579e-06	6.11694e-06	1	0	2	0	0	0	0	0	0	0	1	0	0	0	0	0	0	0	1	0	0	0	0	0	2	2	6	5	18	13	0	0	3	7	6	7	0	0	0	0	33.8043	6.4011	1.34237
ATG9B	ATG9B	7	1.107	3.26675e-06	5.70093e-06	4.63924e-06	0	0	1	0	0	0	0	0	0	0	0	0	0	0	0	0	0	0	0	0	0	0	0	0	21	29	28	9	26	25	0	1	0	0	0	0	0	0	0	0	1	255.028	1.13327
PRKAR1B	PRKAR1B	7	0.538	1.39174e-06	2.52991e-06	6.62518e-06	1	0	1	0	0	0	0	0	0	0	1	0	0	0	0	0	0	0	0	0	2	0	0	0	0	0	6	12	28	25	0	0	0	2	1	7	0	0	0	0	2.82362	90.6535	1.11309
OBSCN	OBSCN	1	0.873	3.18401e-05	1.28087e-05	9.8805e-06	0	0	0	0	0	0	0	0	0	0	0	0	0	0	0	0	0	0	0	0	0	0	0	0	129	93	74	62	24	19	13	22	0	0	0	1	0	0	0	0	15.3807	16.4991	1.08537
HECTD4	HECTD4	12	0.127	1.91252e-05	3.78424e-06	7.34548e-05	1	0	1	0	0	0	2	0	0	0	1	1	0	0	0	0	0	0	1	0	0	0	2	0	9	4	8	4	241	252	5	1	2	4	34	41	0	0	0	0	27.6805	5.09336	1.94957
TNKS2	TNKS2	10	0.481	5.1992e-06	1.35022e-06	1.74295e-05	0	0	0	0	0	0	0	0	0	0	0	1	0	0	0	0	0	3	0	0	0	0	0	0	5	2	2	3	87	86	2	1	0	0	8	18	0	0	0	0	2.18184	1	124.354
AP3B2	AP3B2	15	0.342	4.38147e-06	8.24674e-06	1.19189e-05	0	0	2	0	0	1	0	0	0	0	0	0	0	0	0	0	0	0	0	0	1	0	0	0	4	3	14	15	29	29	2	0	3	2	4	5	0	0	0	0	2.49124	102.191	1.0551
PRR12	PRR12	19	0.051	4.75415e-06	9.82172e-07	4.16883e-05	2	0	0	0	0	0	0	0	0	0	0	0	0	0	0	0	0	0	0	0	0	0	0	0	0	0	1	0	245	252	1	0	0	0	5	6	0	0	0	0	97.9569	1.18787	2.25108
CELF4	CELF4	18	0.231	2.57766e-06	6.86791e-06	6.11684e-06	2	0	0	0	1	0	0	0	0	0	1	0	0	0	0	0	0	0	0	0	1	0	0	0	1	1	7	10	13	18	0	0	2	0	1	2	0	0	0	0	58.9302	4.27736	1.03643
TLE3	TLE3	15	0.073	3.66992e-06	6.37134e-06	8.05242e-06	0	0	0	0	0	0	2	0	0	0	0	0	0	0	0	0	0	0	0	0	0	0	0	0	1	0	4	4	22	23	2	0	1	7	5	11	0	0	0	0	260.34	1	1
YWHAG	YWHAG	7	0.289	1.0795e-06	4.15189e-06	3.65689e-06	0	0	2	0	0	0	0	0	0	0	0	0	0	0	0	0	0	0	0	0	0	0	0	0	0	0	3	0	10	8	0	0	1	1	1	2	0	0	0	0	1	104.272	1.0527
PPP1CC	PPP1CC	12	0.336	1.74317e-06	3.17649e-06	3.66402e-06	0	0	1	0	0	0	0	0	0	0	0	0	0	0	0	0	0	0	1	0	0	0	0	0	1	1	8	7	13	13	0	0	4	1	0	0	0	0	0	0	5.06105	48.9261	1.03463
AHDC1	AHDC1	1	0.076	3.87645e-06	6.8057e-10	4.59856e-05	1	0	0	0	1	0	1	0	0	0	3	0	0	0	0	0	0	0	0	0	0	0	0	0	0	0	0	0	281	275	1	0	0	0	15	22	0	0	0	0	44.8839	1	5.65009
TOP2B	TOP2B	3	0.247	6.70971e-06	3.8045e-06	1.20002e-05	0	0	0	0	0	0	0	0	1	0	0	0	0	0	0	0	0	0	1	0	0	0	2	0	2	3	8	2	22	31	0	0	2	1	5	2	0	0	0	0	2.347	28.2403	3.82347
ZBTB21	ZBTB21	21	0.249	2.74566e-06	6.8057e-10	1.76072e-09	0	0	0	0	0	0	1	0	0	0	0	0	0	0	0	0	0	0	0	0	0	0	0	0	3	1	0	0	0	0	4	0	0	0	0	0	0	0	0	0	68.3316	1	1
NRXN3	NRXN3	14	0.112	3.70142e-06	9.20669e-07	1.8747e-05	0	0	0	0	2	0	1	0	0	0	0	0	0	0	0	0	0	0	0	0	0	0	0	0	0	0	5	1	105	97	2	2	0	3	17	27	1	0	0	0	6.35744	1	3.66354
PTGDR2	PTGDR2	11	1.715	3.47613e-07	5.3357e-06	8.49073e-06	0	0	0	0	0	0	0	0	1	0	0	0	0	0	0	0	0	0	0	0	0	0	0	0	0	0	61	43	35	46	0	0	1	1	1	0	0	0	0	0	1	248.33	1
ZEB2	ZEB2	2	0.107	4.20358e-06	5.64066e-06	1.52087e-05	0	0	0	0	1	0	0	0	1	0	0	0	0	0	0	0	0	0	0	0	1	0	0	0	0	0	8	4	49	49	3	0	3	3	4	6	0	0	0	0	5.38994	40.4407	1.11904
KCNQ2	KCNQ2	20	0.158	3.30343e-06	9.87074e-06	1.59692e-05	0	0	0	0	0	0	0	0	0	0	2	0	0	0	0	1	0	0	1	0	0	0	0	0	2	0	4	7	41	31	0	0	1	0	0	4	0	0	0	0	103.665	1	2.35199
RERE	RERE	1	0.12	6.31827e-06	5.64381e-06	1.33719e-05	0	0	0	0	0	1	2	0	0	0	0	0	0	0	0	1	0	0	0	0	0	0	0	0	0	0	9	4	84	77	1	3	0	4	7	17	0	0	0	0	153.266	1	1.58096
CDKN1C	CDKN1C	11	0.529	4.07762e-07	3.88826e-06	1.25317e-05	0	0	0	0	0	0	0	0	1	0	0	0	0	0	0	0	0	0	0	0	1	0	0	0	0	1	13	4	29	31	0	0	0	0	0	0	0	0	0	0	1	235.315	1
CELF1	CELF1	11	0.171	2.26376e-06	3.01572e-06	7.09981e-06	0	0	1	0	1	0	0	0	0	0	0	0	0	0	0	0	0	0	0	0	0	0	0	0	0	1	11	2	26	14	0	0	2	0	6	7	0	0	0	0	1	141.208	1.55195
TSHZ3	TSHZ3	19	0.285	2.21485e-06	6.8057e-10	1.33337e-05	0	0	0	0	0	0	0	0	0	0	0	0	0	0	0	0	0	0	2	0	0	0	0	0	0	2	0	0	57	52	0	0	0	0	14	11	0	0	0	0	41.9774	1	1.77053
TCF12	TCF12	15	0.372	3.34146e-06	1.43384e-06	1.14148e-06	1	1	0	0	0	0	1	0	0	0	0	0	0	0	0	0	0	0	0	1	1	0	0	0	3	1	8	4	1	2	2	1	2	3	5	0	0	0	0	0	8.24401	22.2402	1.14799
CACNA1E	CACNA1E	1	0.124	1.11563e-05	1.56962e-05	2.54559e-05	0	0	1	0	4	1	1	0	1	0	0	0	0	0	0	0	0	0	0	0	0	1	0	0	6	3	28	25	135	122	3	1	5	6	10	13	0	0	0	0	3.30763	1	63.2127
FBXL3	FBXL3	13	0.288	1.53929e-06	3.0519e-06	4.55241e-06	0	0	1	0	0	0	0	0	0	0	0	0	0	0	0	0	0	0	0	0	1	0	0	0	0	0	14	5	12	17	0	0	0	1	2	3	0	0	0	0	1	208.621	1
SLC9A3	SLC9A3	5	0.31	3.62085e-06	4.81264e-06	1.34355e-05	0	0	0	0	1	1	0	0	2	0	1	0	0	0	0	0	0	0	0	0	0	0	0	0	0	3	13	9	94	95	0	1	1	3	2	3	0	0	0	0	1	35.4682	1.46505
G3BP2	G3BP2	4	0.179	2.73394e-06	4.77006e-06	3.34358e-06	0	0	0	0	1	0	0	0	0	0	0	0	0	0	0	0	1	0	1	0	0	0	0	0	1	0	8	7	9	12	1	0	2	2	0	3	0	0	0	0	12.7098	13.6787	1.16359
PPP1R9B	PPP1R9B	17	0.168	2.14417e-06	5.45005e-06	1.92887e-05	0	0	2	0	0	0	0	0	0	0	0	0	0	0	0	0	0	1	0	0	0	0	0	0	2	0	6	7	49	36	0	1	3	1	4	6	0	0	0	0	1	98.1243	2.01345
CBX4	CBX4	17	0.285	1.19431e-06	4.35185e-06	9.80798e-06	1	0	0	0	0	0	0	0	0	0	0	0	0	0	0	0	0	0	1	0	1	0	0	0	1	0	3	7	29	27	1	0	0	0	0	3	0	0	0	0	84.6387	2.2233	1.02266
CLPTM1	CLPTM1	19	0.326	3.21784e-06	1.93736e-06	1.3696e-05	0	0	0	0	1	0	1	0	0	0	1	1	0	1	0	0	0	0	0	0	0	0	1	0	0	0	5	4	85	86	3	2	1	5	5	13	1	0	0	0	9.27772	2.58266	1.32128
RAI1	RAI1	17	0.116	5.12634e-06	6.8057e-10	8.24613e-06	2	1	0	0	0	0	1	0	0	0	0	0	0	0	0	0	0	0	0	0	0	0	0	0	0	0	0	0	55	49	3	0	0	0	6	13	0	0	0	0	126.978	1	1.43322
TNFAIP3	TNFAIP3	6	0.196	2.90696e-06	6.8057e-10	8.1398e-06	0	0	0	0	1	0	1	0	0	0	0	0	0	0	0	0	0	0	1	0	0	0	0	0	1	0	0	0	43	38	0	0	0	0	12	15	0	0	0	0	43.0268	1	1.55432
LZTS3	LZTS3	20	0.228	1.77131e-06	7.52902e-06	4.47844e-06	1	0	0	0	0	0	0	0	0	1	0	0	1	0	0	0	0	0	0	0	0	0	0	0	1	1	20	19	32	16	0	0	0	0	0	1	0	0	0	0	56.6377	1	1.5763
ADCY5	ADCY5	3	0.254	4.46287e-06	1.07721e-05	1.6854e-05	0	0	2	0	1	0	0	0	1	0	1	0	0	0	0	0	0	0	0	0	0	0	0	0	4	1	24	14	99	99	0	0	4	5	8	14	0	0	0	0	1.45486	78.2848	1.53045
ATP4A	ATP4A	19	0.747	3.75267e-06	4.15375e-06	2.20669e-05	0	0	1	0	0	0	0	0	0	0	1	0	0	0	0	0	0	0	0	0	0	0	0	0	7	4	24	23	102	99	0	4	10	7	8	20	0	0	0	0	1	124.407	1.39898
CSNK1A1	CSNK1A1	5	0.215	1.84233e-06	5.10587e-06	2.27745e-06	0	0	1	0	0	0	0	0	0	0	0	0	0	0	0	0	0	0	0	0	0	0	0	0	0	0	4	0	2	3	0	0	1	1	1	2	1	0	0	0	1	6.695	1
CYLD	CYLD	16	0.204	3.45988e-06	5.01397e-06	7.2465e-06	0	0	1	0	2	1	0	0	0	0	0	0	0	0	0	0	0	0	0	0	0	0	0	0	3	1	6	3	30	19	1	0	2	0	9	9	0	0	0	0	1.91803	17.4215	5.01306
ROPN1	ROPN1	3	1.422	7.89126e-07	1.1766e-06	2.72909e-07	0	0	0	0	0	0	0	0	2	0	0	0	0	0	0	0	0	0	0	0	0	0	0	0	2	0	0	0	0	0	0	0	0	0	0	1	0	0	0	0	1	166.148	1
HDAC4	HDAC4	2	0.052	4.51731e-06	4.55656e-06	1.5839e-05	0	0	0	0	0	0	2	0	1	0	1	1	0	0	0	0	0	0	0	0	0	0	0	0	0	0	13	12	81	92	0	0	0	1	6	11	0	0	0	0	74.4955	2.03036	1.07145
UBN2	UBN2	7	0.213	3.84429e-06	3.50873e-06	3.10597e-06	1	0	0	0	0	0	1	0	0	0	0	0	0	0	0	0	0	0	1	0	0	0	0	0	1	7	20	13	5	11	0	0	0	0	0	0	0	0	0	0	32.633	4.93381	1
PTPRF	PTPRF	1	0.187	7.67937e-06	4.59934e-06	2.79577e-05	0	0	0	0	2	1	0	0	0	0	1	0	0	0	0	0	0	0	0	0	0	0	1	0	14	3	31	22	112	107	1	0	3	4	25	22	0	0	0	0	8.6722	6.69149	2.76853
ACLY	ACLY	17	0.377	5.91979e-06	4.12907e-06	1.4167e-05	0	0	2	0	0	0	0	1	0	0	0	0	0	0	0	0	0	0	0	0	0	0	0	0	4	1	8	7	45	34	1	2	4	4	4	11	0	0	0	0	1	122.156	1.30357
RNF145	RNF145	5	0.309	2.46811e-06	5.12086e-06	4.84374e-06	0	0	2	0	0	0	0	0	0	0	0	0	0	0	0	0	0	0	0	0	1	0	0	0	0	0	2	2	14	10	1	0	1	3	2	2	0	0	0	0	1.57699	87.1782	1.14346
CNOT3	CNOT3	19	0.076	3.43978e-06	8.49191e-06	2.002e-06	0	0	1	1	0	0	0	0	1	0	0	0	0	0	0	0	0	0	1	0	0	0	0	0	0	0	7	1	2	1	1	0	6	5	1	1	0	0	0	0	12.9323	11.6584	1.02109
HIC2	HIC2	22	0.178	1.336e-06	6.8057e-10	1.36242e-05	0	0	0	0	0	0	1	0	0	0	0	0	0	0	0	0	0	0	0	0	0	0	0	0	0	0	0	0	45	57	0	0	0	0	1	3	0	0	1	0	8.30714	1	1
KLHDC10	KLHDC10	7	0.353	2.77933e-06	4.30475e-06	6.47168e-06	2	0	0	1	0	0	0	0	1	0	0	0	0	0	1	0	0	1	0	0	0	0	0	0	1	0	7	3	8	13	0	1	0	3	0	6	0	0	0	0	23.6386	1.5632	2.03571
PCGF3	PCGF3	4	0.338	9.94096e-07	1.42247e-06	3.25025e-06	0	0	0	0	0	0	1	0	0	0	0	0	0	0	0	0	0	0	0	0	1	0	0	0	0	0	4	0	7	11	0	0	0	0	0	1	0	0	0	0	5.57438	25.9531	1
PRPF38B	PRPF38B	1	0.379	4.81814e-06	3.1449e-06	4.77859e-06	1	0	0	0	1	0	0	0	0	0	0	0	1	0	0	0	0	0	0	0	0	0	0	0	3	4	2	0	24	25	2	0	2	0	4	3	0	0	0	0	26.518	3.98062	1.36349
DEDD	DEDD	1	0.329	1.60452e-06	2.40147e-06	4.75982e-06	0	0	1	0	0	0	0	0	0	0	0	0	0	0	0	0	0	0	0	0	0	0	0	0	19	8	4	3	1	3	1	0	1	1	2	1	0	0	0	0	16.3957	8.71709	1
PHF3	PHF3	6	0.286	7.59479e-06	6.8057e-10	1.76072e-09	0	0	0	0	0	0	2	0	0	0	0	0	0	0	0	0	0	0	1	0	0	0	0	0	6	2	0	0	0	0	1	0	0	0	0	0	0	0	0	0	142.576	1	1
SMAD4	SMAD4	18	0.222	2.3115e-06	5.82838e-06	1.89088e-06	0	0	2	0	0	0	0	0	0	0	0	0	0	0	0	0	1	0	0	0	0	0	0	0	0	0	2	6	9	10	0	0	1	1	0	0	0	0	0	0	1	137.498	1.01102
BCL9	BCL9	1	0.381	4.17192e-06	6.8057e-10	1.76072e-09	1	0	0	0	0	0	1	0	0	0	0	0	0	0	0	0	0	0	0	0	0	0	0	0	1	1	0	0	0	0	0	0	0	0	0	0	0	0	0	0	8.51165	1	1
EFTUD2	EFTUD2	17	0.094	4.14311e-06	6.45202e-06	1.01637e-05	1	0	0	0	0	0	1	0	0	0	0	0	0	0	0	0	0	0	0	0	0	0	1	0	0	0	8	8	34	23	0	0	5	3	6	5	0	0	0	0	25.9082	3.09261	1.6346
ZNF202	ZNF202	11	0.419	2.46979e-06	2.65727e-06	1.28188e-06	0	0	0	0	0	0	0	0	0	0	0	0	0	0	0	1	0	0	0	0	1	0	0	0	2	0	5	2	9	3	1	1	0	0	2	1	0	0	0	0	6.57928	15.8427	1.24321
ARID2	ARID2	12	0.096	6.60721e-06	7.01415e-06	3.15578e-06	0	0	2	0	0	0	0	0	0	0	0	0	0	0	0	0	0	0	0	0	1	0	0	0	0	0	17	20	10	10	0	0	3	2	2	2	0	0	0	0	1	122.331	1.05286
SF3B2	SF3B2	11	0.222	5.10406e-06	6.08175e-06	9.55267e-06	0	0	0	0	2	0	1	0	0	0	0	0	0	0	0	0	0	0	1	0	0	0	0	0	0	0	9	11	40	41	0	0	5	4	10	7	0	0	0	0	20.4786	1.30601	4.76679
PSMA3	PSMA3	14	0.278	1.37017e-06	1.54771e-06	2.24821e-06	1	0	0	0	0	0	0	0	0	0	0	1	0	0	0	0	0	0	1	0	0	0	0	0	0	1	4	1	14	7	1	0	0	0	2	5	0	0	0	0	54.8373	1.86228	1.21775
KCNJ6	KCNJ6	21	0.51	1.34779e-06	5.06521e-06	3.87347e-06	0	0	0	0	0	0	0	0	0	0	0	0	0	0	0	0	0	0	0	0	0	0	1	0	2	1	11	2	14	10	0	0	5	1	1	6	0	0	0	0	1.13079	74.05	1.46441
USP22	USP22	17	0.415	2.58603e-06	3.66374e-06	8.72666e-06	0	0	0	0	0	0	0	0	0	0	0	0	0	0	0	0	0	0	0	0	2	0	0	0	2	1	2	4	8	18	1	0	2	2	6	5	0	0	0	0	1.62064	74.0066	1
TOP3B	TOP3B	22	0.538	3.41901e-06	3.3014e-06	1.27055e-05	0	0	0	0	1	0	0	0	0	0	3	0	0	0	0	0	0	0	0	0	0	0	0	0	4	1	7	5	66	47	1	5	0	0	7	11	1	0	0	0	1	1.37848	28.9948
SLC17A7	SLC17A7	19	0.116	1.84284e-06	7.52902e-06	9.91278e-06	0	1	1	0	0	0	0	0	0	0	0	0	0	0	0	0	0	0	0	0	1	0	0	0	1	1	13	9	18	20	0	0	4	1	5	2	0	0	0	0	1	112.011	1.05323
NACC1	NACC1	19	0.169	1.41491e-06	7.96309e-06	1.04711e-05	1	0	0	0	0	0	0	0	1	0	0	0	0	0	0	0	0	0	0	0	0	0	0	0	0	0	8	7	25	25	2	0	3	1	4	8	0	0	0	0	27.0521	4.28127	1.00862
RALGAPB	RALGAPB	20	0.106	6.26299e-06	6.8057e-10	1.98154e-05	1	0	0	0	0	1	2	0	0	0	0	0	0	0	0	0	0	0	0	0	0	0	1	0	2	0	0	0	106	89	0	1	0	0	12	34	0	0	0	0	61.241	1	1.87764
USP49	USP49	6	0.346	2.62456e-06	2.58331e-06	1.34931e-05	0	0	0	0	0	1	0	0	0	0	2	0	0	0	0	0	0	0	0	0	0	0	0	0	1	5	18	8	51	47	0	0	5	4	7	7	0	0	0	0	1	33.465	3.33677
H3F3A	H3-3A	1	1.158	5.19786e-07	3.5706e-06	9.22049e-07	0	0	0	0	1	0	0	0	2	0	0	0	0	0	0	0	0	0	0	0	0	0	0	0	0	0	0	0	0	0	0	0	0	0	0	0	0	0	0	0	1	70.8376	1.5522
CORO1A	CORO1A	16	0.32	1.68639e-06	5.52852e-06	6.79721e-06	0	0	2	0	1	0	0	0	0	0	0	0	0	0	0	0	0	0	0	0	0	0	0	0	2	0	13	13	37	18	0	0	2	2	4	5	0	0	0	0	1.36356	42.4006	1.89516
AKAP9	AKAP9	7	0.404	1.92441e-05	6.8057e-10	1.76072e-09	2	0	0	0	0	0	0	0	0	0	0	0	0	0	0	1	0	0	1	0	0	0	0	0	23	13	0	0	0	0	6	6	0	0	0	0	0	0	0	0	108.806	1	1
FAM120A	FAM120A	9	0.163	3.82687e-06	5.97988e-06	1.60848e-05	0	0	0	0	2	0	0	0	1	0	0	0	0	0	0	0	0	0	0	0	0	0	0	0	2	1	5	2	24	26	0	0	3	2	9	14	0	0	0	0	1	7.65268	1.9999
RAB2A	RAB2A	8	0.22	1.23732e-06	2.37303e-06	2.22135e-06	1	0	0	0	0	0	0	0	0	0	0	0	0	0	0	0	0	0	0	0	0	0	0	0	1	0	2	0	4	3	0	0	0	0	2	0	1	0	0	0	8.68838	1.37349	1.08198
CTPS1	CTPS1	1	0.287	3.10411e-06	4.96659e-06	5.70462e-06	0	0	0	0	0	0	0	0	0	0	0	0	0	0	0	0	1	0	1	0	0	0	0	0	9	6	7	5	22	21	0	0	2	3	3	8	0	0	0	0	9.5852	10.2168	1.05631
ZMYND11	ZMYND11	10	0.12	3.85099e-06	4.96681e-06	7.55579e-06	1	0	0	0	0	0	1	0	0	0	0	0	0	0	0	0	0	0	0	0	0	0	0	0	0	0	4	7	11	20	2	0	3	1	6	13	0	0	0	0	81.5868	1.26665	1
HNRNPD	HNRNPD	4	0.227	1.77784e-06	2.84647e-06	6.17887e-06	1	0	0	0	0	0	1	0	0	0	0	0	0	0	0	0	0	0	0	0	0	0	0	0	0	0	2	5	5	11	0	0	0	3	2	1	0	0	0	0	44.9784	1	1
XPO1	XPO1	2	0.051	4.97123e-06	9.53588e-06	9.91075e-06	0	0	3	1	1	0	0	0	1	0	0	0	0	0	0	0	0	1	0	0	0	0	0	0	0	0	5	8	34	26	0	0	0	1	2	6	0	0	1	0	1	6.18868	1.91563
PHIP	PHIP	6	0.113	1.01785e-05	9.44221e-06	1.87839e-05	1	0	0	0	1	0	1	0	1	0	0	0	0	0	0	0	0	0	0	0	3	0	0	0	2	3	7	10	38	36	0	0	3	6	7	13	0	0	0	0	1.25201	78.5747	1.02809
TSHZ1	TSHZ1	18	0.241	1.98605e-06	6.8057e-10	1.47598e-05	0	0	0	0	1	0	0	0	0	0	0	0	0	0	0	0	0	0	1	0	0	0	2	0	3	0	0	0	82	89	0	1	0	0	10	21	0	0	0	0	7.0975	1	4.2724
MAPKAPK2	MAPKAPK2	1	0.134	2.00364e-06	3.00068e-06	5.30491e-06	0	0	0	0	0	0	0	0	0	0	0	0	0	0	0	0	0	0	0	0	0	0	0	0	0	0	19	8	22	18	0	0	2	1	1	5	0	0	0	0	1	23.6388	1.10487
DIP2C	DIP2C	10	0.149	7.9998e-06	6.48383e-06	3.20839e-05	2	0	0	0	1	1	0	0	0	0	1	0	0	0	0	0	0	0	1	1	0	0	0	0	2	0	22	24	88	88	2	1	5	3	15	23	0	0	0	0	34.0293	2.36018	1.23984
SOX5	SOX5	12	0.188	3.59807e-06	2.9763e-06	7.20909e-06	0	0	0	0	0	0	1	0	0	0	0	0	0	0	0	0	0	0	1	0	0	0	0	0	0	0	1	3	21	24	2	0	0	0	1	9	0	0	0	0	99.2057	1	1
SNX13	SNX13	7	0.364	4.73455e-06	1.02133e-06	6.95578e-06	2	0	0	0	0	0	0	0	0	0	0	1	0	0	0	0	0	0	1	0	0	0	0	0	0	0	0	2	22	19	0	0	2	3	1	9	0	0	0	0	99.1015	1	1
INO80D	INO80D	2	0.228	3.98818e-06	6.57771e-07	1.09788e-05	1	0	0	0	1	0	0	0	0	0	0	0	0	0	0	0	0	0	0	0	0	0	0	0	0	0	0	1	59	59	3	0	2	0	13	12	0	0	0	0	22.8551	2.70531	1.59669
USP48	USP48	1	0.161	5.44961e-06	5.35812e-06	1.16119e-05	0	0	0	0	0	0	0	0	0	0	0	1	1	0	0	0	0	0	0	0	0	0	0	0	3	1	7	4	63	57	0	0	4	2	3	7	0	0	0	0	12.1429	5.74178	1.40399
NAV3	NAV3	12	0.185	9.29474e-06	6.8057e-10	1.76072e-09	0	1	0	0	0	0	1	0	0	0	0	0	0	0	0	0	0	0	0	0	0	0	0	0	15	3	0	0	0	0	5	2	0	0	0	0	0	0	0	0	97.5829	1	1
PTPRT	PTPRT	20	0.18	7.70014e-06	9.616e-07	2.29761e-05	1	0	0	0	1	0	0	0	0	0	1	0	0	0	0	0	0	0	0	0	0	0	2	0	0	0	3	3	127	112	0	1	1	0	13	25	1	0	0	0	1.09287	1.76693	5.49028
MRFAP1	MRFAP1	4	1.135	2.96274e-07	7.7759e-07	3.0602e-06	0	0	1	0	0	0	0	0	0	0	0	0	0	0	0	0	0	0	0	0	0	0	0	0	0	0	2	1	16	20	0	0	3	0	0	2	0	0	0	0	1	93.2362	1
RAB11FIP4	RAB11FIP4	17	0.285	2.71384e-06	1.48412e-06	1.23454e-05	0	0	0	0	0	0	2	0	0	0	0	0	0	0	0	0	0	0	0	0	0	0	0	0	2	0	3	2	49	41	0	0	0	2	4	8	0	0	0	0	67.8674	1	1.3503
GIGYF2	GIGYF2	2	0.077	1.06843e-05	6.8057e-10	9.85954e-06	2	0	0	0	0	0	0	0	0	0	0	0	0	0	0	0	0	0	0	0	0	0	0	0	2	2	0	0	34	42	0	0	0	0	4	10	1	0	0	0	7.87196	1	1
TRAF2	TRAF2	9	0.123	1.97365e-06	1.89669e-06	3.4491e-06	1	0	0	0	0	0	0	0	1	0	0	0	0	0	0	0	0	0	0	0	0	0	0	0	0	0	7	7	25	20	0	0	1	1	6	5	0	0	0	0	8.03942	8.02324	1.40807
MAPK8IP3	MAPK8IP3	16	0.15	5.68947e-06	1.31905e-06	2.66791e-05	0	0	0	0	1	0	0	0	1	0	2	0	0	0	0	0	0	0	0	0	0	0	0	0	6	9	2	1	74	72	0	0	0	0	2	24	0	0	0	0	1	10.8688	1
SNRNP200	SNRNP200	2	0.082	1.17763e-05	2.42984e-05	2.28181e-05	0	0	2	0	3	1	0	0	1	0	0	0	0	0	1	0	0	0	0	0	1	0	0	0	0	2	49	51	83	81	0	2	10	23	12	27	0	0	1	0	1	1	10.641
SETD1B	SETD1B	12	0.151	5.74843e-06	1.3298e-05	5.06943e-05	0	1	0	0	1	0	1	0	0	1	0	0	0	0	0	0	0	1	0	0	0	0	0	0	0	0	75	71	306	274	0	0	0	0	0	0	0	0	0	0	3.67889	2.69633	8.50307
LIN54	LIN54	4	0.172	3.44497e-06	3.30764e-06	2.46522e-06	0	0	0	0	0	0	0	0	0	0	0	0	0	1	0	0	0	0	0	0	0	0	0	0	1	0	2	2	6	5	0	0	3	2	3	0	0	0	0	0	1	24.8931	1.12959
CABP1	CABP1	12	0.396	2.46493e-06	2.9364e-06	1.46285e-05	0	0	1	0	0	0	0	0	0	0	0	0	0	0	1	0	0	0	0	0	0	0	1	0	10	7	9	3	29	14	0	0	1	1	0	1	0	0	0	0	1.77351	23.4844	2.01007
SYK	SYK	9	0.185	2.79692e-06	1.55984e-06	8.07908e-06	1	0	0	0	0	0	0	0	0	0	1	0	0	0	0	0	0	0	0	0	0	0	0	0	2	1	3	1	20	18	0	0	0	0	1	9	1	0	0	0	6.33562	1.46816	1
PLXNA2	PLXNA2	1	0.435	7.71706e-06	6.72299e-07	3.14796e-05	0	0	0	0	3	0	1	0	0	0	1	1	0	0	0	0	0	1	0	0	0	0	0	0	9	7	4	4	140	113	2	1	0	0	25	35	0	0	0	0	3.35269	1.00758	16.0484
MKX	MKX	10	0.398	1.29965e-06	1.94433e-06	1.13214e-06	0	0	2	0	0	0	0	0	0	0	0	0	0	0	0	0	0	0	0	0	0	0	0	0	2	1	5	8	1	3	1	0	1	2	0	0	0	0	0	0	1.85847	44.0599	1
CUX2	CUX2	12	0.187	5.11428e-06	8.99202e-07	2.53624e-05	1	0	0	0	2	0	0	0	1	0	0	0	0	0	0	0	0	0	0	0	0	0	0	0	1	2	1	1	112	92	1	0	0	0	3	10	0	0	0	0	3.23891	10.0411	2.48672
NFIA	NFIA	1	0.202	3.37998e-06	3.47908e-06	8.0704e-06	0	0	0	0	1	0	0	0	0	0	0	0	0	0	0	0	0	0	0	0	1	0	0	0	1	2	7	10	17	24	0	0	3	0	5	9	0	0	0	0	1	20.2651	1
CENPV	CENPV	17	0.736	6.05077e-07	1.73527e-06	8.73014e-06	0	0	0	0	0	0	0	0	1	0	0	0	0	0	0	0	0	0	0	0	0	0	0	0	0	1	14	5	33	27	0	0	0	0	1	2	0	0	0	0	1	65.5024	1.2205
PRDM16	PRDM16	1	0.187	4.06137e-06	1.79752e-06	1.42966e-05	1	0	0	0	0	0	0	0	0	0	0	0	0	0	0	0	0	0	0	0	0	0	1	0	2	1	9	13	98	85	1	0	0	0	4	10	0	0	1	0	6.79383	1	1.93004
GABRB3	GABRB3	15	0.341	2.25221e-06	6.84966e-06	4.78167e-06	1	0	1	0	2	0	0	0	0	0	0	0	0	0	0	0	0	0	0	0	0	0	0	0	0	0	13	12	15	23	1	0	2	6	7	4	0	0	0	0	7.23284	1	5.854
GCN1L1	GCN1	12	0.208	1.11795e-05	2.25752e-06	4.0064e-05	0	0	0	0	0	0	0	0	0	0	0	0	0	0	0	0	0	0	0	0	0	0	0	0	6	4	2	1	184	180	5	1	0	3	36	69	0	0	1	0	5.992	1	2.30637
MCOLN1	MCOLN1	19	0.604	2.94231e-06	3.5886e-06	8.08971e-06	0	0	1	0	0	0	0	0	0	0	0	0	0	0	0	0	0	0	0	0	0	0	0	0	6	4	6	3	27	23	1	0	4	2	2	6	0	0	0	0	1.76657	40.2163	1.1114
KPNA1	KPNA1	3	0.245	2.86542e-06	3.73464e-06	4.7986e-06	0	0	1	0	0	0	0	0	0	0	0	0	0	0	0	0	0	0	0	0	0	0	0	0	0	0	5	5	12	9	0	0	6	2	3	4	0	0	0	0	1	70.8297	1.1121
ARIH1	ARIH1	15	0.166	3.5036e-06	5.06201e-06	8.92379e-06	0	0	0	0	0	0	1	0	1	0	0	0	0	0	0	0	0	0	0	0	0	0	0	0	0	0	2	1	17	11	1	0	2	0	2	6	0	0	0	0	8.3764	8.67662	1.07315
KCND2	KCND2	7	0.574	2.59776e-06	9.03215e-06	4.11988e-06	1	0	0	0	0	0	0	1	0	0	0	0	0	0	0	0	0	0	0	0	1	0	0	0	1	0	14	10	31	28	1	0	4	2	3	5	0	0	0	0	3.35291	18.5798	1.25108
LEMD2	LEMD2	6	0.413	2.0306e-06	5.48384e-06	1.27743e-05	1	0	0	0	0	0	0	0	0	0	0	0	0	0	0	0	1	0	0	0	0	0	0	0	1	2	11	6	74	61	0	2	0	0	5	5	0	0	0	0	1.35612	30.4047	1.88952
BTG3	BTG3	21	0.384	1.08975e-06	1.34354e-06	2.44922e-06	0	0	0	0	0	0	0	0	0	0	0	0	0	0	0	0	0	0	0	0	0	0	0	0	3	1	22	5	8	8	0	0	0	0	0	1	0	0	0	0	1.41575	54.8778	1
CLTC	CLTC	17	0.104	7.6576e-06	1.88444e-05	1.49294e-05	2	0	0	0	0	0	0	1	1	0	0	0	0	1	0	0	0	1	0	0	0	0	0	0	2	3	24	25	43	30	0	0	5	5	5	15	0	0	0	0	14.8382	2.65375	1.9497
EXT1	EXT1	8	0.261	2.69876e-06	1.63624e-06	9.60546e-06	0	0	0	0	1	0	2	0	0	0	0	0	0	0	0	0	0	0	0	0	0	0	1	0	0	0	7	11	25	22	0	0	1	1	5	5	0	0	0	0	58.9623	1	1.29505
NMT1	NMT1	17	0.265	2.92589e-06	4.34719e-06	4.73483e-06	1	0	0	0	1	0	0	0	0	0	0	0	0	0	0	0	0	0	1	0	0	0	0	0	0	0	10	7	28	24	0	0	5	6	3	14	0	0	0	0	30.2476	1.95546	1.28604
SETBP1	SETBP1	18	0.11	4.38532e-06	2.94749e-06	7.95943e-06	2	0	0	0	0	0	0	0	0	0	0	0	0	0	0	0	0	0	0	0	0	0	0	0	0	0	3	11	35	36	0	0	0	0	5	8	0	0	0	0	66.5883	1	1.13512
PPARG	PPARG	3	0.635	1.45661e-06	3.8802e-06	2.5163e-06	0	0	0	0	0	0	0	0	0	0	0	0	0	0	0	0	0	0	0	0	0	0	0	0	0	1	19	7	9	2	0	0	4	2	2	1	0	0	0	0	1	60.6378	1.24432
DMPK	DMPK	19	0.512	2.14601e-06	6.8057e-10	1.10949e-05	0	0	0	0	3	0	0	0	0	0	2	0	0	0	0	0	0	0	0	0	0	0	0	0	0	1	0	0	58	54	0	0	0	0	5	9	0	0	0	0	1	1	74.7122
SLC6A2	SLC6A2	16	0.476	2.37599e-06	1.91494e-06	1.07951e-05	0	0	0	0	2	0	0	0	0	0	0	0	0	0	0	0	0	0	0	0	0	0	0	0	1	1	6	5	70	52	0	0	5	2	8	8	0	0	0	0	1	10.6892	6.98573
PHLDB1	PHLDB1	11	0.372	5.85379e-06	2.01989e-06	3.05728e-06	0	0	0	0	0	0	0	0	0	0	0	0	0	0	0	0	0	0	0	0	0	0	0	0	4	0	18	12	13	9	2	5	5	1	6	8	0	0	0	0	1	60.6624	1.23073
ACTB	ACTB	7	0.232	9.5944e-07	8.42887e-06	3.1879e-06	0	0	1	1	0	0	0	0	2	0	1	0	0	0	0	0	0	0	0	0	0	0	0	0	0	0	0	1	0	0	0	0	2	2	1	2	0	0	0	0	1	7.37336	1.28739
CIC	CIC	19	0.183	4.33825e-06	8.37015e-06	4.55543e-06	1	0	0	0	0	0	0	0	0	0	0	0	0	0	0	0	0	0	1	0	0	0	0	0	2	0	7	8	29	21	1	1	0	3	2	5	0	0	0	0	30.6365	1	1.31761
SON	SON	21	0.118	7.39044e-06	6.8057e-10	1.23582e-05	1	0	0	0	0	0	1	0	0	0	0	0	0	0	0	0	0	0	1	0	0	0	0	0	2	3	0	0	11	6	0	1	0	0	3	0	0	0	0	0	6.86642	1	1.07871
RUSC1	RUSC1	1	0.339	2.39726e-06	1.39214e-06	1.23377e-05	0	0	0	0	0	0	2	0	0	0	0	0	0	0	0	0	0	0	0	0	0	0	0	0	5	2	4	3	64	86	0	0	1	2	3	6	0	0	0	0	72.5101	1	1
SPPL3	SPPL3	12	0.179	1.18339e-06	3.63599e-06	5.00928e-06	0	0	1	0	0	0	0	0	0	0	0	0	1	0	0	0	0	0	0	0	0	0	0	0	0	0	2	4	7	5	0	0	3	2	0	0	0	0	0	0	11.0737	6.39152	1.02054
ATRN	ATRN	20	0.195	7.53197e-06	6.51053e-07	1.25441e-05	0	0	0	0	0	0	0	0	0	0	0	0	0	0	0	0	0	0	1	0	0	0	0	0	6	3	2	3	28	30	3	0	1	0	2	13	0	0	0	0	22.0684	1.44944	1
AP3D1	AP3D1	19	0.296	4.68146e-06	3.92546e-06	1.02873e-05	0	0	0	0	3	0	0	0	0	0	1	1	0	0	0	0	0	0	0	0	0	0	0	0	2	0	8	7	75	55	0	0	1	5	1	3	0	0	0	0	1.13545	1	42.8635
IGSF9B	IGSF9B	11	0.324	6.11174e-06	2.03078e-06	2.14637e-05	0	0	0	0	0	0	0	0	0	0	1	0	0	0	0	0	0	0	0	0	0	0	1	0	0	2	10	10	64	62	0	1	3	0	6	3	0	0	1	0	1	6.21998	1.29638
CPD	CPD	17	0.433	5.53755e-06	1.54494e-06	1.46308e-05	2	0	0	0	1	0	0	0	0	0	0	0	0	0	0	0	0	0	0	0	0	0	0	0	1	1	7	4	49	34	3	2	0	0	4	9	0	0	0	0	24.6839	1.93659	1.48695
SYT7	SYT7	11	0.329	1.65103e-06	2.09796e-06	9.43018e-06	0	0	0	0	2	0	0	0	0	0	0	0	0	0	0	0	0	0	1	0	0	0	1	0	0	0	7	2	19	26	0	0	0	0	3	7	0	0	0	0	5.69903	2.92253	3.23478
ZNF362	ZNF362	1	0.354	1.38265e-06	4.0422e-06	5.36476e-06	1	0	0	0	0	0	0	0	0	0	0	0	0	0	0	1	0	0	0	0	0	0	0	0	1	0	13	14	15	14	0	0	4	3	2	2	0	0	0	0	34.044	1.86107	1.07061
SLC15A3	SLC15A3	11	1.366	1.55646e-06	3.10224e-06	6.24361e-06	0	0	0	0	0	0	0	0	1	0	0	0	0	0	0	0	0	0	0	0	0	0	0	0	16	24	35	25	14	17	0	2	0	0	0	0	0	0	0	0	1	67.3615	1
KAT6B	KAT6B	10	0.128	7.5978e-06	2.54504e-06	9.87104e-06	0	0	0	0	0	0	0	0	0	0	0	0	0	0	0	1	0	0	0	0	0	0	0	0	1	1	12	18	43	48	1	0	1	1	8	8	0	0	1	0	8.00791	1	1.17868
SPRY2	SPRY2	13	0.273	1.20595e-06	6.8057e-10	4.21034e-06	0	0	0	0	0	0	1	0	0	0	0	0	0	0	0	0	0	0	1	0	0	0	0	0	1	0	0	0	19	12	0	0	0	0	1	1	0	0	0	0	53.6631	1	1.24621
RUNX1T1	RUNX1T1	8	0.312	2.62623e-06	6.71804e-07	1.01082e-05	1	0	0	0	0	0	1	0	0	0	0	0	0	0	0	0	0	0	0	0	0	0	0	0	3	0	1	0	16	16	1	0	0	0	3	6	0	0	0	0	54.8728	1.21246	1
TRIM28	TRIM28	19	0.082	3.08887e-06	5.77037e-07	1.20089e-05	0	0	0	0	2	0	0	0	0	0	2	1	0	0	0	0	0	0	0	0	0	0	0	0	0	0	0	0	21	26	0	0	0	0	1	5	0	0	0	0	1	1	5.45877
LRRC4	LRRC4	7	0.166	1.80481e-06	6.8057e-10	8.87302e-06	1	0	0	0	2	0	0	0	0	0	0	0	0	0	0	0	0	0	0	0	0	0	0	0	1	0	0	0	26	21	1	0	0	0	6	8	0	0	0	0	14.3887	1	4.57919
EIF3G	EIF3G	19	0.275	1.21979e-06	2.98139e-06	4.11945e-06	0	0	1	0	2	0	0	0	0	0	1	0	0	0	0	0	0	0	0	0	0	0	0	0	2	0	3	3	6	7	0	0	2	2	2	6	0	0	0	0	1.41713	6.65728	6.97562
TNRC6B	TNRC6B	22	0.173	8.11655e-06	6.8057e-10	1.20943e-05	2	0	0	0	0	0	0	0	0	0	0	0	0	0	0	0	0	0	0	0	0	0	0	0	5	3	0	0	44	30	3	2	0	0	7	8	0	0	0	0	39.7944	1	1.65341
C3	C3	19	0.305	8.59761e-06	5.15903e-07	2.42071e-05	0	0	0	0	3	0	0	0	1	0	1	0	0	0	0	0	0	0	0	0	0	0	0	0	4	7	0	0	84	86	0	2	0	0	15	39	0	0	0	0	1	11.8971	5.52849
FEZF2	FEZF2	3	0.222	9.59474e-07	3.78746e-06	6.87544e-06	0	0	1	0	0	0	1	0	0	0	0	0	0	0	0	0	0	0	0	0	0	0	0	0	0	0	2	0	17	22	0	0	1	2	1	3	0	0	0	0	7.98542	4.04266	1
MAST3	MAST3	19	0.224	4.59838e-06	1.07891e-05	2.11356e-05	0	0	0	0	1	0	0	0	0	0	0	1	0	0	0	0	0	0	0	0	2	0	0	0	1	2	47	42	97	89	1	1	5	8	10	7	0	0	0	0	1	32.494	2.00014
MSANTD2	MSANTD2	11	0.374	1.91285e-06	1.81735e-06	8.60376e-06	0	0	1	0	0	0	0	0	0	0	0	0	0	0	0	0	0	0	0	0	0	0	0	0	3	0	6	3	18	22	0	0	3	2	3	6	0	0	0	0	1.61906	39.8442	1
CTR9	CTR9	11	0.135	6.04809e-06	8.72935e-06	9.88492e-06	0	0	2	0	0	0	1	0	0	1	0	0	0	0	0	0	0	0	0	0	0	0	0	0	1	1	13	11	21	17	1	0	4	5	8	16	0	0	0	0	3.10002	18.8354	1.10426
CCAR2	CCAR2	8	0.323	4.22988e-06	2.80146e-06	1.60245e-06	0	0	0	0	0	0	0	0	0	0	0	0	0	0	0	0	0	0	1	0	0	0	0	0	4	1	7	9	5	4	0	0	6	2	0	2	0	0	0	0	6.66104	9.48666	1
SRCAP	SRCAP	16	0.096	1.2635e-05	5.40434e-08	5.55519e-06	3	0	0	0	0	1	1	0	0	0	0	0	0	0	0	0	0	0	1	0	0	0	0	0	0	4	0	0	13	18	1	0	0	0	2	1	0	0	0	0	62.6097	1	1
PRPF8	PRPF8	17	0.178	1.23248e-05	3.10235e-05	2.08861e-05	0	0	1	1	1	3	0	0	1	1	0	0	0	0	0	0	1	0	1	0	0	0	1	0	3	3	23	24	30	30	0	4	18	14	9	15	0	0	0	0	1	24.9519	1
METTL2A	METTL2A	17	1.352	1.92173e-06	1.58175e-06	3.07891e-06	0	0	0	0	0	0	0	0	0	0	3	0	0	0	0	0	0	0	0	0	0	0	0	0	3	0	7	14	0	1	0	4	0	0	1	0	0	0	0	0	1	1	61.927
DDAH1	DDAH1	1	0.952	1.19873e-06	1.45688e-06	4.17716e-06	0	0	0	0	0	0	0	0	1	0	0	0	0	0	0	0	0	0	0	0	1	0	0	0	6	0	0	3	11	15	1	0	0	0	0	2	0	0	0	0	1.37078	45.132	1
PCSK2	PCSK2	20	0.241	2.88335e-06	8.40522e-06	4.75141e-06	1	0	0	0	0	0	0	0	0	0	0	0	0	0	0	0	0	0	0	0	0	0	0	0	1	0	18	8	23	17	2	1	3	4	6	7	0	0	0	0	10.345	4.38856	1.3503
HIVEP2	HIVEP2	6	0.08	7.24186e-06	1.66006e-06	5.00631e-07	1	0	0	0	0	0	1	0	0	0	0	0	1	0	0	0	0	0	0	0	0	0	0	0	2	3	1	1	0	0	1	0	1	1	0	0	0	0	0	0	60.888	1	1
TFAP4	TFAP4	16	0.172	1.5175e-06	2.31244e-06	2.50456e-06	0	0	1	0	0	0	0	0	0	1	0	0	0	0	0	0	0	0	0	0	0	0	0	0	0	1	8	4	5	3	0	0	2	0	1	1	0	0	0	0	1	57.1825	1.05435
SCAPER	SCAPER	15	0.377	7.17135e-06	3.55464e-06	7.6701e-06	0	0	0	1	0	0	0	0	0	1	3	0	0	0	0	0	0	0	0	0	0	0	0	0	3	5	2	5	18	25	0	3	3	0	4	7	0	0	0	0	1	2.36518	25.1803
ING1	ING1	13	0.756	1.3467e-06	5.59192e-06	2.8251e-06	0	0	0	0	0	0	0	0	0	0	0	0	0	0	0	1	0	0	0	0	1	0	0	0	0	0	30	23	24	27	0	0	2	2	2	0	0	0	0	0	1.776	29.3079	1.1179
RARA	RARA	17	0.33	1.71805e-06	6.13446e-06	5.48348e-06	0	0	1	1	0	0	0	0	0	0	0	0	0	0	0	0	0	0	0	0	0	0	1	0	1	0	22	7	14	12	0	0	4	4	3	2	0	0	0	0	1.10592	36.1069	1.44526
TBCEL	TBCEL	11	0.313	1.99224e-06	1.36161e-06	4.88087e-06	0	0	0	0	0	0	1	0	1	0	0	0	0	0	0	0	0	0	0	0	0	0	0	0	1	0	0	0	13	11	0	0	1	1	1	4	0	0	0	0	5.61859	10.0411	1.02164
ZNF536	ZNF536	19	0.218	2.56292e-06	7.11752e-06	1.25139e-05	0	0	0	0	0	0	0	0	0	0	0	0	0	0	0	0	0	1	0	0	0	0	0	0	0	1	11	12	47	44	4	0	3	3	6	4	0	0	0	0	7.00595	1	2.07797
ELAVL3	ELAVL3	19	0.462	9.81081e-07	4.50986e-06	6.55076e-06	0	0	2	0	0	0	0	0	0	0	0	0	0	0	0	0	0	0	0	0	0	0	0	0	0	0	2	3	17	12	0	0	2	2	7	6	0	0	0	0	1	43.5229	1.29702
PAPOLA	PAPOLA	14	0.177	3.685e-06	4.20813e-06	5.14243e-06	0	0	0	0	1	0	0	0	1	0	0	0	0	0	0	0	0	0	0	0	0	0	0	0	0	0	12	6	22	17	0	0	2	0	2	4	0	0	0	0	1	41.1359	1.36804
AMH	AMH	19	1.771	1.24856e-06	6.09215e-06	7.58429e-06	0	0	0	0	0	0	0	0	0	0	0	0	0	0	0	1	0	0	0	0	0	0	0	0	2	0	65	47	72	69	0	0	0	1	0	1	0	0	0	0	1	38.0495	1.46684
GATA5	GATA5	20	0.629	1.03066e-06	2.36716e-06	6.04998e-06	0	0	0	0	0	0	0	0	0	0	0	0	0	0	0	0	0	0	0	0	0	0	0	0	0	4	25	8	22	23	0	0	0	0	0	0	0	0	0	0	1	53.3294	1.03916
SVEP1	SVEP1	9	0.254	1.30271e-05	4.44175e-06	3.98301e-06	0	0	1	0	0	0	0	0	0	0	0	0	0	0	0	0	0	0	0	0	0	0	0	0	13	10	19	12	16	13	4	3	1	0	0	0	0	0	0	0	1.5346	31.8723	1.11912
CSDE1	CSDE1	1	0.144	4.23959e-06	6.94099e-07	1.37504e-05	1	0	0	0	0	1	1	0	0	0	0	0	0	0	0	0	0	0	0	0	0	0	0	0	2	0	0	2	59	46	0	0	0	0	11	8	0	0	0	0	27.4378	1	1.98825
SBNO2	SBNO2	19	0.413	4.61379e-06	5.0241e-06	9.10738e-06	0	0	1	0	0	0	0	0	1	0	0	0	0	0	0	0	0	0	0	0	0	0	0	0	16	13	5	8	56	58	0	0	0	0	0	0	1	0	0	0	1.75655	5.73135	1.21304
SEC24B	SEC24B	4	0.194	5.24509e-06	6.8057e-10	1.76072e-09	0	0	0	0	0	0	0	0	0	0	0	0	0	0	0	0	0	0	1	0	0	0	0	0	2	0	0	0	0	0	4	0	0	0	0	0	0	0	0	0	53.7022	1	1
LMTK3	LMTK3	19	0.182	3.56674e-06	1.78387e-06	7.56824e-06	2	0	0	0	0	0	0	0	0	0	0	0	0	0	0	0	0	0	0	0	0	0	0	0	2	2	0	0	0	0	0	0	0	0	0	0	0	0	0	0	53.2698	1	1
SRP9	SRP9	1	0.904	4.97509e-07	9.68697e-07	1.1878e-06	0	0	1	0	0	0	0	0	0	0	0	0	0	0	0	0	0	0	0	0	0	0	0	0	0	0	0	0	8	0	0	1	3	1	0	2	0	0	0	0	1	44.6965	1.18788
PPP3CB	PPP3CB	10	0.098	2.91266e-06	4.09996e-06	3.48941e-06	0	0	0	0	0	0	0	0	0	0	0	0	0	0	0	0	1	0	0	0	0	1	0	0	1	0	5	3	13	9	0	1	3	4	0	1	0	0	0	0	1	13.5355	1.10052
CUL5	CUL5	11	0.159	4.82886e-06	6.70009e-06	7.20647e-06	0	0	1	0	0	0	0	0	0	0	0	0	0	0	0	0	0	0	0	0	0	0	0	0	0	0	3	6	14	18	1	0	5	2	10	4	0	0	0	0	1.41915	6.98152	1.18672
ST3GAL2	ST3GAL2	16	0.354	1.81872e-06	3.2529e-06	3.24479e-06	0	0	0	0	0	0	0	0	0	0	1	0	0	0	0	0	0	0	1	0	0	0	0	0	2	1	7	6	17	7	0	0	2	1	1	3	0	0	0	0	5.79295	2.08627	1.66716
GPR4	GPR4	19	0.861	6.46952e-07	5.29002e-06	5.44907e-06	0	0	0	0	0	0	0	0	1	0	0	0	0	0	0	0	0	0	0	0	0	0	0	0	1	0	14	4	7	6	0	1	3	2	2	3	0	0	0	0	1	52.2852	1.00141
LRP11	LRP11	6	0.744	1.73413e-06	4.5109e-06	7.75944e-06	0	0	0	0	0	0	0	0	0	0	0	0	0	0	0	0	0	0	0	0	1	0	0	0	1	2	18	10	15	20	3	3	0	0	0	2	0	0	0	0	1.34835	38.4031	1
PLXNB1	PLXNB1	3	0.385	7.59261e-06	6.8057e-10	2.83128e-05	1	0	0	0	0	0	0	0	0	0	0	1	0	0	0	0	0	0	2	0	0	0	0	0	3	3	0	0	146	123	0	1	0	0	17	38	0	0	0	0	17.9913	1	2.86216
RAB30	RAB30	11	0.378	1.46194e-06	9.72772e-07	2.28943e-06	0	0	0	0	0	1	0	0	0	0	0	0	0	0	0	0	0	0	0	0	0	0	0	0	5	0	1	0	6	9	2	0	1	0	1	2	0	0	1	0	6.90371	2.15091	1
ZFYVE26	ZFYVE26	14	0.602	1.04587e-05	6.8057e-10	1.76072e-09	1	0	0	0	0	0	0	0	0	0	0	0	1	0	0	0	0	0	0	0	0	0	0	0	14	12	0	0	0	0	10	5	0	0	0	0	0	0	0	0	50.1591	1	1
ZFHX4	ZFHX4	8	0.144	9.98116e-06	6.8057e-10	1.76072e-09	0	0	0	0	0	0	0	0	0	0	0	0	0	0	0	0	0	0	2	0	0	0	0	0	0	0	0	0	0	0	2	1	0	0	0	0	0	0	0	0	49.5712	1	1
DDB1	DDB1	11	0.243	5.02048e-06	9.63392e-06	1.33335e-05	0	0	0	0	1	2	0	0	0	0	1	0	0	0	0	0	0	0	0	0	1	0	0	0	0	2	18	6	32	13	2	0	2	3	6	8	0	0	0	0	1.23474	17.1729	1.61238
MYB	MYB	6	0.353	3.58902e-06	4.06047e-06	2.29305e-06	0	0	1	0	0	0	0	0	0	0	0	0	0	0	0	0	0	0	0	0	0	0	0	0	1	0	7	7	13	10	0	0	4	0	0	2	0	0	0	0	1	45.5802	1.08307
KIAA0232	KIAA0232	4	0.195	4.62551e-06	6.8057e-10	1.76072e-09	2	0	0	0	0	0	0	1	0	0	0	0	0	0	0	0	0	0	0	0	0	0	0	0	0	0	0	0	0	0	0	0	0	0	0	0	0	0	0	0	48.8512	1	1
TRIM39	TRIM39	6	0.269	3.30277e-06	5.18365e-06	3.71448e-06	0	0	1	0	0	0	0	0	2	0	0	0	0	0	0	0	0	0	0	0	0	0	0	0	0	1	13	18	9	12	0	0	0	0	0	0	0	0	0	0	1	48.1892	1
CPSF7	CPSF7	11	0.199	2.63159e-06	1.71357e-06	8.95677e-06	0	0	1	0	0	0	0	0	1	0	0	0	0	0	0	0	0	0	0	1	0	0	0	0	1	1	2	3	30	31	0	0	0	1	2	5	0	0	0	0	1	30.0337	1.01907
EML6	EML6	2	0.453	9.46743e-06	6.8057e-10	1.76072e-09	1	0	0	0	0	0	0	0	0	0	0	0	0	0	0	0	0	0	1	0	0	0	0	0	16	8	0	0	0	0	0	0	0	0	0	0	1	0	0	0	12.4401	1	1
DNAH1	DNAH1	3	0.478	1.82843e-05	6.8057e-10	1.76072e-09	0	0	0	0	0	0	0	0	0	0	0	0	0	0	0	0	0	0	0	0	0	0	0	0	58	41	0	0	0	0	9	10	0	0	0	0	0	0	0	0	34.6718	1	1
ACIN1	ACIN1	14	0.201	7.80282e-06	9.2955e-06	1.06064e-05	0	0	0	0	0	0	0	0	0	0	0	1	0	0	0	0	0	0	1	0	0	0	0	0	3	5	40	29	46	43	0	3	7	6	9	11	0	0	0	0	1	34.2449	1.39378
YWHAZ	YWHAZ	8	0.357	1.08165e-06	2.54052e-06	2.16581e-06	0	0	1	0	0	0	0	0	1	0	0	0	0	0	0	0	0	0	0	0	0	0	0	0	0	0	0	0	0	0	0	0	0	0	1	1	0	0	0	0	1	47.0052	1.01314
MADD	MADD	11	0.576	8.75656e-06	8.34977e-08	1.5031e-05	0	0	0	0	1	1	0	0	0	0	1	0	0	0	0	0	0	0	0	0	0	0	0	0	19	17	0	0	79	69	7	4	2	0	11	21	0	0	0	0	7.5234	3.65731	1.71936
GRIN1	GRIN1	9	0.309	3.72939e-06	2.03746e-05	1.10442e-05	0	0	3	0	0	1	0	0	2	0	0	0	0	0	0	0	0	0	0	0	1	0	0	0	0	0	16	10	23	21	0	2	5	6	2	7	0	0	0	0	1	46.5699	1
LRRC7	LRRC7	1	0.157	6.43568e-06	7.46736e-06	2.85131e-06	0	0	0	0	0	0	1	0	0	0	0	0	0	0	0	1	0	0	0	0	0	0	0	0	4	5	5	8	4	8	2	0	1	2	2	4	0	0	0	0	46.5458	1	1
ARHGAP32	ARHGAP32	11	0.254	7.49144e-06	4.96104e-06	5.33691e-06	0	0	0	0	0	0	0	0	1	0	0	0	0	0	0	0	0	0	0	0	0	0	0	0	11	4	12	5	37	47	1	0	1	1	3	5	0	0	0	0	3.63011	12.7543	1
RBM5	RBM5	3	0.135	5.35397e-06	6.40617e-06	8.98596e-06	1	0	0	0	0	0	0	0	0	0	0	0	0	0	0	0	0	0	0	0	0	0	0	0	1	0	12	8	32	37	0	1	6	4	8	7	0	0	0	0	1.55464	9.58465	1.13127
TFAP2C	TFAP2C	20	0.371	1.36682e-06	3.18516e-06	6.84899e-06	1	0	0	0	0	0	0	0	0	0	0	0	1	0	0	0	0	0	0	0	0	0	0	0	2	0	13	7	19	11	0	0	0	3	2	3	0	0	0	0	37.4208	1	1.22543
TET3	TET3	2	0.086	4.53557e-06	8.60465e-06	2.24554e-06	0	0	0	0	0	0	1	0	0	0	0	0	0	0	0	0	0	0	1	0	0	0	0	0	4	3	5	9	8	8	1	0	3	2	0	2	0	0	0	0	45.4576	1	1
ZBTB1	ZBTB1	14	0.262	2.52439e-06	1.41184e-06	8.59087e-06	1	0	0	0	0	0	0	0	0	0	0	0	0	0	0	0	0	0	0	0	0	0	0	0	2	0	4	2	29	31	0	0	3	1	3	3	0	0	0	0	7.03831	6.06223	1.06245
CELF3	CELF3	1	0.392	2.51635e-06	5.00925e-06	3.01448e-06	0	0	0	0	0	0	0	0	1	0	0	0	0	0	0	0	0	0	0	0	0	0	0	0	1	1	19	10	10	6	1	2	2	1	1	3	0	0	0	0	1	41.2057	1.09405
ONECUT2	ONECUT2	18	0.394	1.01542e-06	1.05914e-06	1.21342e-05	0	0	0	0	0	0	0	0	1	0	0	0	0	0	0	0	0	0	0	0	0	0	0	0	1	0	0	1	28	26	2	0	1	0	5	12	0	0	0	0	3.23564	13.4231	1.01941
KCNT2	KCNT2	1	0.374	6.42832e-06	4.50341e-06	1.11937e-05	0	0	1	0	0	1	0	1	0	0	0	0	0	0	0	0	0	0	0	0	0	0	0	0	2	0	6	2	24	29	1	1	5	3	4	8	0	0	0	0	1	43.9645	1
KIAA0368	ECPAS	9	0.198	1.10473e-05	1.99521e-06	5.78042e-06	1	0	0	0	0	0	2	0	0	0	0	0	0	0	0	0	0	0	0	0	0	0	0	0	4	1	3	4	32	17	0	0	1	2	5	1	0	0	0	0	24.3537	1	1.79334
GAD2	GAD2	10	0.372	2.80244e-06	6.8057e-10	8.91087e-06	0	0	0	0	0	0	0	0	0	0	3	0	0	0	0	0	0	0	0	0	0	0	0	0	1	0	0	0	61	51	0	0	0	0	5	4	0	0	0	0	1.03526	1	41.8417
GNAL	GNAL	18	0.206	2.02591e-06	7.30184e-06	6.53262e-06	0	0	0	0	1	0	0	0	0	0	0	0	0	0	0	0	0	0	0	0	0	0	0	0	1	0	22	11	21	16	0	0	1	1	0	1	0	0	0	0	1.08967	7.47686	1.19671
PTBP1	PTBP1	19	0.176	2.2373e-06	6.8057e-10	6.0258e-06	1	0	0	0	0	0	0	0	0	0	0	0	0	0	0	0	0	0	0	0	0	0	0	0	0	0	0	0	8	8	0	0	0	0	2	3	0	0	1	0	6.85807	1	1
TNIP2	TNIP2	4	0.736	1.96846e-06	6.8057e-10	4.90114e-06	0	0	0	0	0	0	0	0	0	0	3	0	0	0	0	0	0	0	0	0	0	0	0	0	2	1	0	0	26	34	0	0	0	0	0	2	0	0	0	0	1.06609	1	40.3721
LEO1	LEO1	15	0.35	3.66105e-06	1.54546e-06	6.18692e-06	1	0	0	0	0	0	0	0	0	0	1	0	0	0	0	0	0	0	0	0	0	0	0	0	2	0	2	1	26	18	2	0	2	1	5	3	0	0	0	0	11.5607	2.4218	1.53329
KCNH1	KCNH1	1	0.387	3.23911e-06	5.9919e-06	7.98068e-06	0	0	2	1	0	0	0	1	0	0	0	0	0	0	0	0	0	0	0	0	0	0	0	0	3	4	7	5	17	20	0	0	5	2	4	9	0	0	0	0	1	42.2615	1
WDR47	WDR47	1	0.392	3.59556e-06	3.18612e-06	7.29361e-06	0	0	0	0	0	0	0	0	0	0	0	0	0	0	0	0	0	0	1	0	0	0	0	0	2	1	7	9	21	18	2	2	5	1	3	5	0	0	0	0	4.9828	7.57035	1.11413
PPP1R13B	PPP1R13B	14	0.269	4.64226e-06	6.8057e-10	1.46662e-05	0	0	0	0	1	0	1	0	0	0	0	0	0	0	0	0	0	0	0	0	0	0	0	0	3	1	0	0	79	52	1	0	0	0	14	16	0	0	0	0	6.39582	1	2.95593
DMWD	DMWD	19	0.515	1.37616e-06	2.90591e-06	1.64304e-05	0	0	0	0	0	0	2	1	0	0	0	0	0	0	0	0	0	0	1	0	0	0	0	0	0	1	4	13	56	40	1	0	1	2	0	2	0	0	0	0	28.0656	1	1.48715
NALCN	NALCN	13	0.522	9.01535e-06	1.17985e-05	1.68217e-05	1	0	2	0	0	0	1	0	0	0	3	0	0	0	1	0	0	0	0	0	0	0	1	0	12	13	13	20	115	99	0	6	2	10	12	11	0	0	0	0	1	1	40.9951
YLPM1	YLPM1	14	0.261	1.08439e-05	3.89753e-06	2.84993e-06	1	0	0	0	0	0	1	0	0	0	0	0	0	0	0	0	0	0	0	0	0	0	0	0	1	2	16	11	12	14	3	3	6	3	2	2	0	0	0	0	1.4339	27.7709	1.02723
KIR3DL2	KIR3DL2	19	1.87	8.81435e-07	4.64704e-06	3.62975e-06	0	0	1	0	0	0	0	0	0	0	0	0	0	0	0	0	0	0	0	0	0	0	0	0	4	1	118	114	26	28	0	0	0	0	0	0	0	0	0	0	1	37.755	1.07779
PNN	PNN	14	0.44	3.41013e-06	2.46061e-06	3.74798e-06	0	0	0	0	0	0	2	0	0	0	0	0	0	0	0	0	0	0	0	0	0	0	0	0	9	2	5	8	13	7	0	2	0	0	3	2	0	0	0	0	32.3873	1	1.24915
USP6NL	USP6NL	10	0.42	4.11966e-06	6.8057e-10	1.76072e-09	0	0	0	0	0	0	0	0	0	0	0	0	0	0	0	0	0	0	0	0	0	0	0	0	6	4	0	0	0	0	4	1	0	0	0	0	1	0	0	0	6.20075	1	1
KCTD2	KCTD2	17	0.697	7.87082e-07	3.08436e-06	5.97643e-06	0	0	0	0	0	0	0	0	0	0	0	0	0	0	0	0	0	0	0	0	1	0	0	0	1	0	4	2	13	13	0	0	2	0	3	2	0	0	0	0	1.09062	34.7887	1.06029
GOLGA4	GOLGA4	3	0.515	1.02652e-05	6.8057e-10	1.76072e-09	0	0	0	0	0	0	1	0	0	0	0	0	0	0	0	0	0	0	0	0	0	0	0	0	16	10	0	0	0	0	5	2	0	0	0	0	1	0	0	0	12.6336	1	1
RELN	RELN	7	0.176	1.59822e-05	1.39186e-06	1.07383e-05	2	0	0	0	1	0	0	1	0	0	0	0	0	0	0	0	0	0	1	0	0	0	0	0	5	3	0	3	93	71	3	1	0	0	12	11	0	0	0	0	12.9216	1	3.11199
PTPN11	PTPN11	12	0.135	3.0815e-06	2.86348e-06	8.03665e-06	1	0	1	0	0	0	0	0	0	0	1	1	0	0	0	0	0	1	0	0	0	0	0	0	0	0	2	0	23	26	0	0	2	4	4	7	0	0	0	0	6.14413	4.16273	1.56125
GATAD2B	GATAD2B	1	0.097	3.21282e-06	3.23872e-06	7.66594e-06	1	0	0	0	0	0	0	0	0	0	0	0	0	0	0	0	0	0	0	0	0	0	0	0	0	0	6	4	21	10	0	0	2	0	8	6	0	0	0	0	6.22461	4.14375	1.5354
TRPC6	TRPC6	11	0.654	3.46557e-06	2.39317e-06	9.27418e-06	0	0	0	0	0	0	0	0	0	0	0	0	0	0	0	0	0	0	1	0	0	0	0	0	5	4	5	3	34	31	8	2	2	7	12	7	0	0	0	0	25.3556	1	1.5501
SLTM	SLTM	15	0.274	7.88155e-06	6.8057e-10	7.45109e-06	0	0	0	0	0	0	1	0	0	0	0	0	0	0	0	0	0	0	1	0	0	0	0	0	3	1	0	0	38	38	3	0	0	0	3	9	0	0	0	0	35.3844	1	1.09671
RORC	RORC	1	0.161	2.94867e-06	6.8057e-10	7.30349e-06	0	0	0	0	3	0	0	0	0	0	0	0	0	0	0	0	0	0	0	0	0	0	0	0	0	1	0	0	20	12	0	0	0	0	0	0	0	0	0	0	1	1	38.6872
KIDINS220	KIDINS220	2	0.35	7.44052e-06	3.27024e-06	2.1822e-06	0	0	0	0	0	0	1	0	0	0	0	0	0	0	0	0	1	0	0	0	0	0	0	0	8	6	6	8	12	12	1	0	3	3	5	4	0	0	0	0	3.25533	10.1765	1.16687
TNIK	TNIK	3	0.181	8.93244e-06	5.7996e-06	1.33181e-05	0	0	0	0	0	0	1	0	0	0	0	0	0	0	0	0	0	0	0	0	0	0	0	0	2	2	10	15	55	41	2	0	9	4	4	11	0	0	0	0	2.69956	9.45605	1.50143
TRIM24	TRIM24	7	0.115	4.87877e-06	1.70121e-06	1.41091e-05	0	0	0	0	0	0	1	0	1	0	0	0	0	0	0	0	0	0	0	0	0	0	1	0	1	0	3	2	28	25	0	0	0	0	5	11	0	0	0	0	3.91053	9.57771	1.02265
LDB1	LDB1	10	0.291	1.83027e-06	4.21454e-06	5.73261e-06	2	0	0	0	0	0	0	0	0	0	0	0	0	0	0	0	0	0	0	0	0	0	0	0	0	0	4	1	7	9	0	1	0	2	0	2	0	0	0	0	37.8503	1	1
ITGB4	ITGB4	17	0.648	7.74118e-06	1.04432e-06	1.91265e-05	0	0	0	0	0	0	0	0	1	0	0	0	0	0	0	0	0	0	0	0	0	0	0	0	10	14	4	5	176	191	6	3	0	0	11	17	0	0	0	0	2.57373	7.89723	1.85932
HDLBP	HDLBP	2	0.154	5.05817e-06	1.75183e-06	2.11935e-05	0	0	0	0	3	0	0	0	0	0	0	0	0	0	0	0	0	0	0	0	0	0	0	0	5	1	1	3	71	51	1	0	0	0	17	20	0	0	0	0	2.47561	1	15.2494
NPTN	NPTN	15	0.247	1.59371e-06	2.46784e-06	5.85274e-06	0	0	0	0	0	0	0	0	0	0	0	0	0	0	0	0	0	0	0	0	0	0	0	0	1	0	31	17	13	9	1	0	1	2	2	6	0	0	0	0	1.8809	18.7884	1.05467
AHNAK	AHNAK	11	0.308	7.0216e-06	6.8057e-10	1.76072e-09	1	0	0	0	0	0	0	0	0	0	0	0	0	0	0	0	0	0	0	0	0	0	0	0	8	0	0	0	0	0	5	3	0	0	0	0	0	0	0	0	36.8224	1	1
FRMD5	FRMD5	15	0.254	2.73343e-06	2.50326e-06	4.98813e-06	0	0	2	0	0	0	0	0	0	0	0	0	0	0	0	0	0	0	0	0	0	0	0	0	2	1	27	27	15	11	0	0	2	7	3	3	0	0	0	0	1.05685	16.1505	1.17107
TCERG1	TCERG1	5	0.227	6.54322e-06	6.8057e-10	1.24026e-05	0	0	0	0	0	1	1	0	0	0	1	0	0	0	0	0	0	0	1	0	0	0	0	0	2	1	0	0	23	25	3	1	0	0	7	3	0	0	0	0	33.2254	1	1.10179
PER1	PER1	17	0.466	5.1389e-06	6.8057e-10	1.76072e-09	1	0	0	0	0	0	0	0	0	0	0	0	0	0	0	1	0	0	0	0	0	0	0	0	6	4	0	0	0	0	4	2	0	0	0	0	0	0	0	0	36.4487	1	1
ATP1B1	ATP1B1	1	0.153	2.28705e-06	1.39763e-06	3.36336e-06	1	0	0	0	0	0	0	0	0	0	0	0	0	0	0	0	0	0	0	0	0	0	0	0	0	0	2	2	4	9	0	0	0	1	2	2	0	0	0	0	7.09236	1	1
ARHGEF7	ARHGEF7	13	0.187	3.08083e-06	2.48707e-07	1.4811e-05	1	0	0	0	0	0	0	0	0	0	1	0	0	0	0	0	0	0	1	0	0	0	0	0	2	3	1	0	54	59	0	1	0	0	6	18	0	0	0	0	14.9671	1.2468	1
GRIK2	GRIK2	6	0.262	4.1066e-06	4.97989e-06	7.22591e-06	0	0	0	0	1	0	2	0	0	0	0	0	0	0	0	0	0	0	0	0	0	0	0	0	3	1	9	23	29	28	1	2	0	1	4	12	0	0	0	0	33.3063	1	1.07865
SCAF1	SCAF1	19	0.254	3.49405e-06	8.16204e-08	6.35894e-06	1	0	0	0	0	0	0	0	0	0	0	0	0	0	0	0	0	0	0	0	0	0	0	0	3	0	0	0	11	16	0	0	0	0	1	1	0	0	1	0	7.14952	1	1
SAP130	SAP130	2	0.159	4.61948e-06	2.79546e-06	1.56481e-05	0	0	0	0	1	0	0	0	0	0	0	0	0	0	0	0	0	0	0	0	1	0	0	0	0	0	15	11	38	46	0	0	1	0	6	8	0	0	0	0	1	35.5366	1
PSMC3	PSMC3	11	0.338	1.94736e-06	5.63325e-06	5.04435e-06	0	0	0	0	0	0	0	0	1	0	0	0	0	0	0	0	0	0	0	0	0	0	1	0	2	2	9	4	10	6	0	0	3	1	5	5	0	0	0	0	1	22.7941	1.54721
GRIK3	GRIK3	1	0.192	4.61295e-06	9.80203e-07	1.83206e-05	0	0	0	0	2	0	0	0	1	0	0	0	0	0	0	0	0	0	0	0	0	0	0	0	2	0	0	1	72	62	1	0	0	0	11	22	0	0	0	0	1.64012	7.68183	2.79902
ZNF608	ZNF608	5	0.165	3.79053e-06	2.31671e-06	8.96845e-07	1	0	0	0	0	0	0	0	0	0	0	0	0	0	0	0	0	0	1	0	0	0	0	0	0	0	7	9	3	4	0	0	0	0	0	1	0	0	0	0	35.1447	1	1
KLHL36	KLHL36	16	0.398	1.79292e-06	6.8057e-10	1.3125e-05	0	0	0	0	0	1	0	0	0	0	0	0	0	0	0	0	0	0	0	0	0	0	3	0	0	0	0	0	38	37	0	0	0	0	6	2	0	0	0	0	1	1	35.0913
HGS	HGS	17	0.456	3.40779e-06	8.56827e-06	2.38398e-06	1	0	0	0	1	0	0	0	1	0	0	0	0	0	0	0	0	0	0	0	1	0	0	0	14	15	38	33	5	5	0	0	1	3	1	1	0	0	0	0	2.73188	5.36754	1.40078
MACF1	MACF1	1	0.084	3.12153e-05	5.69875e-06	2.11332e-05	0	0	0	0	0	0	0	0	0	0	0	0	1	0	0	0	0	0	0	0	0	0	0	0	0	0	6	7	129	121	2	2	6	2	15	25	0	0	0	0	1.92753	8.1476	2.21919
CNOT2	CNOT2	12	0.189	3.03795e-06	3.08302e-06	6.67269e-06	0	0	0	0	0	0	0	0	1	0	1	0	0	0	0	0	0	0	1	0	0	0	0	0	0	0	0	1	19	14	0	0	0	0	7	8	0	0	0	0	7.18059	3.66161	1.32354
PRPF4B	PRPF4B	6	0.17	6.56483e-06	9.56739e-07	1.02759e-05	2	0	0	0	0	0	0	0	0	0	1	0	0	0	0	0	0	0	0	0	0	0	0	0	0	0	0	1	13	10	0	0	0	0	4	7	0	0	0	0	34.3197	1	1.01352
LCK	LCK	1	0.212	2.64047e-06	6.03906e-06	6.84217e-06	0	0	1	0	0	0	0	0	0	0	0	0	0	0	0	0	0	0	0	0	0	0	0	0	9	6	22	12	16	12	0	0	5	7	2	8	0	0	0	0	1.78635	18.9484	1.02751
SP3	SP3	2	0.146	2.75437e-06	1.60626e-06	3.1052e-06	0	0	0	0	2	0	0	0	0	0	0	0	0	0	0	0	0	0	0	0	0	0	0	0	1	0	2	1	7	9	0	0	0	0	3	7	0	0	0	0	1.03795	1.15483	6.70223
AGAP2	AGAP2	12	0.267	4.88983e-06	1.62498e-05	1.84366e-05	0	0	0	0	3	0	0	0	0	0	0	0	0	0	0	0	0	0	0	0	0	0	1	0	0	0	38	39	67	48	1	0	0	0	5	13	0	0	0	0	1.40107	1	14.2035
HUNK	HUNK	21	0.263	2.7944e-06	4.34696e-06	5.50575e-06	1	0	0	0	0	0	0	0	0	0	0	0	0	0	0	0	0	0	0	0	0	0	0	0	1	2	23	25	11	18	0	0	6	2	2	6	0	0	0	0	3.58467	9.62002	1
PSMD6	PSMD6	3	0.235	1.84686e-06	6.8057e-10	5.3996e-06	0	0	0	0	0	0	0	0	0	0	0	0	0	0	0	0	0	0	1	0	0	0	0	0	5	3	0	0	9	12	1	0	0	0	3	3	0	0	0	0	17.6862	1	1
MTMR3	MTMR3	22	0.258	5.63135e-06	5.53188e-06	3.2665e-06	0	0	0	0	0	0	0	0	0	1	0	0	0	0	0	0	0	0	0	0	1	0	0	0	5	1	18	16	35	41	4	0	3	6	2	5	0	0	0	0	13.6939	2.39908	1.03907
LONP1	LONP1	19	0.244	3.51633e-06	6.8057e-10	1.52757e-05	0	0	0	0	2	0	1	0	0	0	1	0	0	0	0	0	0	0	0	0	0	0	0	0	1	1	0	0	155	131	0	0	0	0	8	10	0	0	0	0	3.88175	1	8.76039
MAN1A1	MAN1A1	6	0.462	2.70496e-06	6.8057e-10	9.45821e-06	0	0	0	0	0	0	2	0	0	0	0	0	0	0	0	0	0	0	0	0	0	0	0	0	2	0	0	0	37	42	0	0	0	0	8	7	0	0	0	0	29.1232	1	1.15885
NEO1	NEO1	15	0.347	7.34253e-06	6.8057e-10	2.68233e-07	0	0	0	0	0	0	2	0	0	0	0	0	0	0	0	0	0	0	1	0	0	0	0	0	2	3	0	0	0	0	0	0	0	0	0	0	0	0	0	0	33.7072	1	1
SRRM3	SRRM3	7	0.525	1.67651e-06	4.19284e-06	1.50801e-05	0	0	0	0	0	0	0	0	1	0	0	0	0	0	0	0	0	0	0	0	0	0	0	0	3	2	13	10	53	52	0	0	0	0	0	0	0	0	0	0	1.13433	7.46771	1.17132
SARM1	SARM1	17	1.143	1.74585e-06	4.54994e-06	1.38651e-05	0	0	1	0	0	0	0	0	0	0	0	0	0	0	0	0	0	0	0	0	0	0	0	0	9	7	22	17	44	35	2	3	2	1	3	3	0	0	0	0	1.0111	24.3814	1.35347
CLK3	CLK3	15	0.43	3.70811e-06	4.74524e-06	5.63859e-06	0	0	0	0	0	0	0	0	1	0	0	0	0	0	0	0	0	0	0	0	0	0	0	0	1	1	7	7	10	11	0	1	7	4	4	4	0	0	0	0	1	32.2762	1.0296
PNPLA6	PNPLA6	19	0.641	6.53166e-06	1.56399e-05	2.29652e-05	0	0	0	1	1	1	0	0	1	0	0	0	0	0	0	0	0	0	0	0	2	0	0	0	18	22	36	27	71	68	0	5	7	10	5	10	0	0	0	0	1	27.8143	1.17952
TNRC6A	TNRC6A	16	0.159	8.40465e-06	1.78554e-06	3.72773e-06	0	0	0	0	0	0	2	0	0	0	0	0	0	0	0	0	0	0	0	0	0	0	1	0	3	4	5	3	30	21	1	1	2	2	1	0	0	0	0	0	8.65739	1.904	1.9844
KCNN2	KCNN2	5	0.274	1.9363e-06	6.06784e-06	2.1402e-06	1	0	0	0	0	0	0	0	1	0	0	0	0	0	0	0	0	0	0	0	0	0	0	0	0	1	5	6	3	5	0	0	3	0	0	1	0	0	0	0	4.18508	7.81576	1
NTRK2	NTRK2	9	0.112	3.83994e-06	6.21794e-06	9.21581e-06	0	0	0	0	0	0	0	0	0	0	1	0	0	0	0	0	0	0	0	0	0	0	0	0	0	0	10	10	47	52	0	1	7	1	5	11	0	0	0	0	1	30.9643	1.0558
KATNAL1	KATNAL1	13	0.439	2.21284e-06	6.8057e-10	4.74572e-06	0	0	0	0	0	0	0	0	0	0	0	0	0	0	0	0	0	0	1	0	0	0	0	0	7	0	0	0	14	16	2	0	0	0	6	10	0	0	0	0	31.7248	1	1.03047
DUS1L	DUS1L	17	0.965	2.71601e-06	1.21846e-06	3.94578e-06	0	0	1	0	0	0	0	0	0	0	0	0	0	0	0	0	0	0	1	0	0	0	0	0	8	15	7	0	17	13	1	0	0	1	0	1	0	0	0	0	1.02693	28.3462	1.12048
RAPGEF1	RAPGEF1	9	0.222	5.36569e-06	6.14235e-06	6.25279e-06	0	0	0	0	0	0	0	0	0	0	1	1	0	0	0	0	0	0	0	0	0	0	0	0	1	2	17	8	17	20	0	0	6	4	5	9	0	0	0	0	1	32.4013	1
BRD1	BRD1	22	0.245	4.86721e-06	6.21173e-06	1.79775e-05	0	0	0	0	1	0	0	0	0	0	1	0	0	0	0	0	0	0	1	0	0	0	0	0	3	0	17	16	65	60	1	0	3	2	17	22	0	0	0	0	10.1335	1.95758	1.63185
ZBED4	ZBED4	22	0.405	2.85638e-06	6.8057e-10	1.62069e-05	0	0	0	0	0	0	0	0	0	0	0	0	0	0	0	0	0	0	2	0	0	0	0	0	0	0	0	0	82	81	0	1	0	0	9	16	0	0	0	0	22.4208	1	1.42547
LRFN3	LRFN3	19	0.268	8.02576e-07	3.37009e-06	1.4748e-05	0	0	1	0	0	0	0	0	0	1	1	1	0	0	0	0	0	0	0	0	0	0	0	0	3	4	11	4	49	42	0	0	0	0	0	2	0	0	0	0	1	26.4458	1.20812
BTRC	BTRC	10	0.456	4.69033e-06	2.76888e-07	7.14048e-06	1	0	0	0	0	0	1	0	0	0	0	0	0	0	0	0	0	0	0	0	0	0	0	0	3	2	0	0	27	21	0	0	0	0	5	7	1	0	0	0	6.45259	1	1.28682
RAC2	RAC2	22	0.284	7.60902e-07	3.17717e-06	1.33665e-06	0	0	0	0	0	0	0	0	0	0	0	0	0	0	0	0	1	0	0	0	0	0	0	0	0	0	3	2	2	2	0	0	3	2	0	0	0	0	0	0	1	31.2042	1
LRRC4C	LRRC4C	11	0.306	1.53661e-06	9.9601e-07	8.14938e-06	0	0	1	0	1	0	0	0	0	0	0	0	0	0	0	0	0	0	0	0	0	0	0	0	0	0	1	0	36	29	1	0	0	0	9	11	0	0	0	0	1.6552	12.7074	1.48227
PHOX2B	PHOX2B	4	0.34	6.29616e-07	2.76411e-06	8.82097e-06	0	0	0	0	0	0	0	0	0	0	0	0	0	0	0	0	0	0	0	0	0	0	0	0	0	0	3	5	17	10	0	0	6	0	6	2	0	0	0	0	1	23.3238	1.33464
ATP6V1A	ATP6V1A	3	0.358	3.22035e-06	1.6911e-06	7.79463e-06	0	0	0	0	1	0	0	0	1	0	0	0	0	0	0	0	0	0	0	0	0	0	0	0	0	0	8	5	19	18	0	0	0	1	4	8	0	0	0	0	1	9.04512	1.03624
SETD1A	SETD1A	16	0.136	6.22882e-06	2.69101e-06	1.11457e-05	0	0	0	0	0	0	2	0	0	0	0	0	0	0	0	0	0	0	0	0	0	0	0	0	0	0	5	2	19	24	0	1	0	0	8	10	0	0	0	0	17.629	1.74948	1
HCN1	HCN1	5	0.181	3.28652e-06	1.03068e-05	7.28659e-06	0	0	0	0	0	0	0	0	0	0	0	0	0	0	0	0	0	0	0	0	0	0	0	0	3	0	30	25	14	9	2	0	6	5	5	6	0	0	0	0	4.53874	5.78607	1.17374
MTOR	MTOR	1	0.185	1.52928e-05	1.78829e-05	3.20366e-05	0	0	0	0	0	0	0	0	1	0	0	0	0	0	0	0	1	0	0	0	1	0	3	0	6	3	24	28	107	104	4	1	4	7	18	21	0	0	0	0	2.38013	1	12.8285
ARF3	ARF3	12	0.716	8.79007e-07	1.90655e-06	2.69938e-06	0	0	0	0	0	0	0	0	1	0	2	0	0	0	0	0	0	0	0	0	0	0	0	0	1	0	1	1	2	1	0	0	0	1	0	0	0	0	0	0	1.08278	3.85562	7.28988
DNAJC2	DNAJC2	7	0.292	3.61113e-06	6.8057e-10	1.22263e-06	0	0	0	0	0	0	0	0	0	0	0	0	0	0	0	0	0	0	1	0	0	0	0	0	1	3	0	0	1	6	5	1	0	0	0	0	0	0	0	0	30.3377	1	1
LRRTM3	LRRTM3	10	0.312	1.85556e-06	4.89488e-07	8.62039e-06	0	0	0	1	0	0	1	0	0	0	0	0	0	0	0	0	0	0	0	0	0	0	0	0	2	0	0	0	16	18	0	0	0	2	3	10	0	0	1	0	7.14307	1	1
GAPVD1	GAPVD1	9	0.125	6.77487e-06	2.41849e-06	4.802e-06	0	0	1	1	0	0	1	0	1	0	0	0	0	0	0	0	0	0	0	0	0	0	0	0	0	0	14	16	18	13	0	0	1	0	6	4	0	0	0	0	3.07474	7.28413	1.33619
HECTD1	HECTD1	14	0.158	1.40243e-05	5.09304e-07	3.96736e-05	1	0	1	0	0	0	0	0	0	0	0	0	0	0	0	0	0	0	0	0	0	0	0	0	2	0	0	0	112	112	1	2	1	0	20	33	0	0	0	0	1	22.7564	1.30997
MYH11	MYH11	16	0.305	1.04686e-05	4.37212e-06	1.75688e-05	1	0	0	0	2	0	0	0	0	0	0	0	0	0	0	0	0	0	0	0	1	0	0	0	1	3	9	6	27	34	0	0	0	0	2	14	0	0	0	0	1	11.4806	1.28
DCTN2	DCTN2	12	0.247	1.80666e-06	1.93791e-06	2.13452e-06	0	0	0	0	0	0	0	0	0	0	0	0	0	0	0	0	0	0	0	0	0	0	0	0	0	2	22	17	8	3	0	0	3	1	0	0	0	0	0	0	1	14.0388	1.13724
NOXA1	NOXA1	9	1.032	2.08956e-06	1.46934e-06	1.30958e-06	0	0	0	0	0	0	0	0	1	0	0	0	0	0	0	0	0	0	0	0	0	0	0	0	15	9	11	7	9	6	0	0	0	0	0	0	0	0	0	0	1.12687	22.6343	1.10909
ENC1	ENC1	5	0.488	1.79945e-06	4.47548e-06	7.19169e-06	1	0	0	0	1	0	1	0	0	0	0	0	0	0	0	0	0	0	0	0	0	0	0	0	1	2	10	3	6	5	2	1	8	12	0	5	0	0	0	0	14.5325	1.93989	1
NBEAL2	NBEAL2	3	0.32	1.13617e-05	6.8057e-10	1.53661e-05	0	0	0	0	1	0	1	0	0	0	0	0	0	0	0	1	0	0	0	0	0	0	0	0	18	22	0	0	83	78	4	0	0	0	8	19	0	0	0	0	19.2032	1	1.46496
TM9SF4	TM9SF4	20	0.25	3.69689e-06	2.3756e-06	1.01295e-05	0	0	1	0	0	0	0	0	0	0	0	0	0	0	0	0	0	0	0	0	0	0	0	0	0	0	4	6	26	28	4	1	1	1	5	7	0	0	0	0	6.04694	4.49403	1.02731
GGNBP2	GGNBP2	17	0.073	4.32569e-06	2.86327e-06	7.39967e-06	1	0	0	0	0	0	1	0	0	0	0	0	0	0	0	0	0	0	0	0	0	0	0	0	1	2	5	3	38	30	1	0	0	3	1	5	0	0	0	0	21.6079	1	1.28664
LINGO1	LINGO1	15	0.196	1.39372e-06	3.34878e-06	1.26705e-05	0	0	0	0	0	0	0	0	1	0	0	0	0	0	0	0	0	0	0	0	0	0	0	0	0	1	7	1	36	37	0	0	1	0	2	5	0	0	0	0	1	27.7285	1
ASPHD2	ASPHD2	22	0.541	1.16361e-06	6.8057e-10	8.34018e-06	0	0	0	0	3	0	0	0	0	0	0	1	0	0	0	0	0	0	0	0	0	0	0	0	2	2	0	0	22	27	0	0	0	0	6	6	0	0	0	0	1	1	27.5978
ADAMTS19	ADAMTS19	5	0.537	5.7625e-06	5.25564e-06	7.33015e-06	0	0	0	0	0	0	0	0	1	0	0	0	0	0	0	0	0	0	0	0	0	0	0	0	3	5	30	18	55	44	2	3	1	3	1	3	0	0	0	0	1	17.276	1.57468
AP2M1	AP2M1	3	0.19	2.53695e-06	7.68784e-06	3.43176e-06	1	0	0	0	0	0	0	0	2	0	0	0	0	0	0	0	0	0	0	0	0	0	0	0	0	0	4	5	8	5	0	0	2	4	3	5	0	0	0	0	6.28088	3.95213	1.09285
TROVE2	RO60	1	0.429	2.11167e-06	6.8057e-10	1.76072e-09	2	0	0	0	0	0	0	0	0	0	0	0	0	0	0	0	0	0	0	0	0	0	0	0	4	3	0	0	0	0	1	2	0	0	0	0	0	0	0	0	27.1117	1	1
CACNA2D2	CACNA2D2	3	0.229	5.99131e-06	5.26751e-06	1.33723e-05	0	0	0	0	0	0	0	0	0	0	0	0	0	0	0	0	0	0	0	0	1	0	0	0	0	1	11	4	72	65	2	2	2	4	4	6	0	0	0	0	1	9.68355	1.54913
MBNL1	MBNL1	3	0.425	2.23361e-06	4.42208e-06	3.62756e-06	0	0	0	0	2	0	0	0	1	0	0	0	0	0	0	0	0	0	0	0	0	0	0	0	0	0	11	5	10	4	0	0	2	5	2	3	0	0	0	0	1	3.52158	7.67071
ELAVL4	ELAVL4	1	0.382	1.33709e-06	2.59958e-06	4.84797e-06	0	0	1	0	0	0	0	0	0	0	0	0	0	0	0	0	0	0	0	0	0	0	0	0	1	1	3	0	14	19	0	0	2	1	7	2	0	0	0	0	1	24.0178	1.12158
ZBTB18	ZBTB18	1	0.179	1.64004e-06	2.9039e-06	7.86989e-06	0	0	0	0	0	0	0	0	1	0	0	0	0	0	0	0	0	0	1	0	0	0	0	0	0	0	2	4	13	9	0	0	0	1	3	10	0	0	0	0	8.86452	1.67063	1
MED24	MED24	17	0.698	4.27912e-06	1.93854e-06	9.57389e-06	0	0	0	0	1	0	0	0	1	0	0	0	0	0	0	0	0	0	0	0	0	0	1	0	9	9	4	1	40	40	2	2	0	0	11	12	0	0	0	0	1.29219	13.9537	1.4871
ITPKA	ITPKA	15	0.472	1.33754e-06	6.05303e-06	1.02342e-05	0	0	1	0	0	0	0	0	1	0	0	0	0	0	0	0	0	0	0	0	0	0	0	0	1	0	24	17	43	21	0	0	1	3	2	5	0	0	0	0	1.11458	13.5721	1.76564
ZNF598	ZNF598	16	0.399	2.76593e-06	1.04939e-07	1.00062e-05	1	0	0	0	0	0	0	1	0	0	0	0	0	0	0	0	0	1	0	0	0	0	0	0	20	14	0	0	51	44	0	0	0	0	0	2	0	0	0	0	12.9336	1	2.06285
ADCY1	ADCY1	7	0.272	4.34478e-06	8.75881e-06	2.27958e-05	0	0	0	0	0	0	1	0	0	1	0	0	0	0	0	0	0	1	0	0	0	0	0	0	1	2	18	11	105	99	1	0	6	7	2	12	0	0	0	0	3.67748	3.65072	1.9571
WDR81	WDR81	17	0.534	5.62549e-06	6.8057e-10	3.57934e-05	0	0	0	0	4	0	0	1	0	0	0	0	0	0	0	0	0	0	0	0	0	0	0	0	8	5	0	0	238	246	0	1	0	0	3	21	0	0	0	0	1	1	19.1373
POLE	POLE	12	0.64	1.05929e-05	4.55131e-07	1.16776e-05	0	0	0	0	0	0	0	0	0	0	1	1	0	0	0	0	0	0	0	0	0	0	0	0	14	16	5	0	46	42	8	5	1	1	14	9	0	0	0	0	4.08317	3.68894	1.70944
PTK2B	PTK2B	8	0.313	5.91761e-06	6.8057e-10	1.03293e-05	0	0	0	0	0	0	0	0	0	0	3	0	0	0	0	0	0	0	0	0	0	0	0	0	8	10	0	0	68	69	1	4	0	0	6	12	0	0	0	0	1	1	25.6502
TNFRSF11A	TNFRSF11A	18	0.597	1.75523e-06	1.83024e-06	1.9675e-06	0	0	1	0	0	0	0	0	0	0	0	0	0	0	0	0	0	0	0	0	0	0	0	0	2	1	6	4	8	12	0	0	0	0	1	0	0	0	0	0	1.09724	12.9232	1
PHF23	PHF23	17	0.167	2.1497e-06	6.8057e-10	5.12433e-06	0	0	0	0	0	0	0	0	0	0	0	0	0	0	0	0	0	0	1	0	0	0	0	0	1	1	0	0	15	14	0	0	0	0	1	7	0	0	0	0	7.47159	1	1
ADCY7	ADCY7	16	0.552	4.1952e-06	6.8057e-10	2.11999e-05	0	0	0	0	1	0	0	0	0	0	2	0	0	0	0	0	0	2	0	0	0	0	1	0	14	15	0	0	108	107	2	2	0	0	14	22	0	0	0	0	1.21301	1	20.8916
TMEM57	MACO1	1	0.259	3.04498e-06	5.92783e-06	5.18415e-06	1	0	1	0	0	0	0	0	0	0	0	0	0	0	0	0	0	0	0	0	0	0	0	0	1	0	15	12	19	14	0	0	3	4	2	3	0	0	0	0	5.08038	4.20629	1.18183
ARHGAP5	ARHGAP5	14	0.263	4.20391e-06	6.8057e-10	4.76016e-06	0	0	0	0	0	0	0	0	0	0	0	0	0	0	0	1	0	0	0	0	0	0	0	0	0	0	0	0	9	14	2	1	0	0	1	0	0	0	0	0	13.8635	1	1
CACNA2D1	CACNA2D1	7	0.245	6.33837e-06	1.96153e-06	1.22613e-05	1	0	1	0	0	0	0	0	0	0	1	1	0	0	0	0	0	0	0	0	0	0	0	0	0	0	5	3	31	38	0	0	0	1	14	12	0	0	0	0	3.15247	6.78438	1.16683
C19orf43	TRIR	19	0.819	4.19135e-07	4.08948e-06	2.74783e-06	0	0	0	0	0	0	0	0	0	0	0	0	0	0	0	0	0	0	0	0	0	0	0	0	1	0	22	8	0	3	0	0	0	0	0	1	0	0	0	0	1.06576	23.3787	1
CD44	CD44	11	0.664	3.45469e-06	7.14917e-07	2.70319e-06	0	0	0	0	0	0	0	0	1	0	0	0	0	0	0	0	0	0	0	0	0	0	0	0	9	10	2	1	5	12	4	2	1	2	1	3	0	0	0	0	2.55693	9.73883	1
KIF2A	KIF2A	5	0.162	3.17161e-06	4.13257e-06	8.7897e-06	0	0	1	0	0	0	0	0	0	0	0	0	0	0	0	0	0	0	0	0	0	0	0	0	0	0	11	7	43	31	1	0	0	0	2	5	0	0	0	0	1.56392	10.8568	1.46256
EIF4G3	EIF4G3	1	0.112	7.47368e-06	7.87571e-07	1.47274e-05	0	0	1	0	0	0	0	0	0	0	0	0	0	0	0	0	0	0	0	0	0	0	0	0	1	2	2	1	55	39	0	0	0	0	8	10	0	0	0	0	1	13.8097	1.78143
SUV39H2	SUV39H2	10	0.358	2.22574e-06	2.78442e-06	3.82214e-06	0	0	0	0	0	0	0	0	0	0	0	0	0	0	0	0	0	0	0	0	1	0	0	0	0	0	6	2	11	10	1	0	2	3	0	0	0	0	0	0	1.57282	14.6941	1.04124
SMARCD1	SMARCD1	12	0.206	2.9557e-06	4.27848e-06	9.01806e-06	0	0	0	0	0	0	1	0	0	0	0	0	0	0	0	0	0	0	0	0	0	0	0	0	1	1	6	6	27	25	0	0	3	0	4	5	0	0	0	0	4.73207	4.45523	1.14002
AMIGO1	AMIGO1	1	0.238	1.0561e-06	4.30009e-06	5.81443e-06	0	0	0	0	1	0	0	0	0	0	1	0	0	0	0	0	0	0	0	0	0	0	0	0	0	0	8	4	37	27	0	0	4	1	3	4	0	0	0	0	1	13.3405	1.79704
NKX6-1	NKX6-1	4	1.003	5.54726e-07	1.90105e-07	4.91622e-06	0	0	0	0	0	0	0	0	0	0	2	0	0	0	0	0	0	0	0	0	0	0	0	0	1	0	11	5	2	4	1	0	0	0	1	2	0	0	0	0	1.11823	4.36805	4.90766
WDR26	WDR26	1	0.085	3.07061e-06	5.18075e-06	1.08428e-05	1	0	1	0	0	0	0	0	0	0	0	0	0	0	0	0	0	0	0	0	0	0	1	0	0	0	6	8	26	33	0	0	2	1	8	5	0	0	0	0	6.51019	3.35219	1.09774
DNAAF3	DNAAF3	19	0.987	2.38018e-06	3.35297e-06	4.82563e-06	0	0	0	0	0	0	0	0	0	0	0	0	0	0	0	0	0	0	0	0	0	0	0	0	2	1	27	14	14	10	0	1	0	0	2	2	0	0	0	0	1	20.9331	1.1438
SFMBT2	SFMBT2	10	0.252	4.94963e-06	1.6792e-06	5.67268e-06	0	0	0	0	0	0	0	0	0	0	0	0	0	0	0	1	0	0	0	0	0	0	1	0	2	1	4	3	29	29	0	0	0	2	4	10	0	0	0	0	7.40348	1	1.38956
TKT	TKT	3	0.563	2.1378e-06	6.8057e-10	1.17301e-05	0	0	0	0	3	0	0	0	0	0	0	0	0	0	0	0	0	0	0	0	0	0	1	0	1	5	0	0	71	70	0	1	0	0	8	18	0	0	0	0	1	1	23.8158
AKT2	AKT2	19	0.417	1.99308e-06	3.30908e-06	9.06997e-06	0	0	0	0	2	0	0	0	0	0	0	0	0	0	0	0	0	0	0	0	0	0	0	0	1	2	7	2	44	42	1	0	1	0	6	9	0	0	0	0	1.19954	4.25016	4.64857
SREK1	SREK1	5	0.351	3.05453e-06	4.00265e-06	3.03017e-06	0	0	0	0	0	0	0	0	0	0	0	0	0	0	0	0	0	0	0	0	0	0	0	0	0	0	8	3	8	4	0	0	3	1	3	1	0	0	0	0	1	9.03643	1.19061
SZT2	SZT2	1	0.405	1.96411e-05	6.8057e-10	3.64834e-05	0	0	0	0	1	0	0	1	0	0	0	1	0	0	0	0	0	0	0	1	0	0	0	0	13	9	0	0	172	175	8	3	0	0	25	34	0	0	0	0	9.138	1	2.55636
ABL2	ABL2	1	0.58	5.38144e-06	4.40876e-06	2.39822e-06	0	0	0	0	0	0	0	0	0	1	0	0	0	0	0	0	0	0	0	0	0	0	0	0	17	16	19	12	8	8	1	2	5	3	3	5	0	0	0	0	1.00988	22.1099	1.04307
LSM12	LSM12	17	0.271	1.09135e-06	1.47611e-06	1.59848e-06	0	0	1	0	0	0	0	0	0	0	0	0	0	0	0	0	0	0	0	0	0	0	1	0	0	0	1	0	0	0	0	0	0	0	0	0	0	0	0	0	1	10.8473	1.54353
CECR2	CECR2	22	0.167	7.28273e-06	2.10086e-06	8.91312e-06	2	0	0	0	0	0	0	0	0	0	0	0	0	0	0	0	0	0	0	0	0	0	0	0	2	1	0	0	0	0	0	0	0	0	0	0	0	0	0	0	23.0877	1	1
NR3C2	NR3C2	4	0.35	4.47929e-06	2.49836e-06	5.42186e-06	1	0	0	0	0	0	0	0	0	0	0	0	0	0	0	0	0	0	0	0	0	0	0	0	2	1	10	10	17	14	3	0	1	0	1	6	0	0	0	0	14.0132	1.59595	1.03073
STK38L	STK38L	12	0.348	2.10983e-06	3.49863e-06	4.06908e-06	0	0	0	0	0	0	0	0	0	0	0	0	0	0	0	0	0	0	0	0	0	0	0	0	3	2	8	7	10	5	2	0	3	0	2	1	0	0	0	1	3.1206	6.30796	1.16999
ATF7	ATF7	12	0.205	2.21452e-06	2.17362e-06	1.79791e-06	0	0	0	0	0	0	0	0	0	0	0	0	0	0	0	0	0	0	0	0	0	0	0	0	2	0	3	4	7	7	0	0	5	0	2	3	0	0	0	0	1.34195	16.3899	1.0411
MAST4	MAST4	5	0.381	1.01465e-05	6.8057e-10	1.55041e-05	0	0	0	0	0	0	0	0	0	0	0	0	0	0	0	0	0	0	1	0	0	0	2	0	4	6	0	0	71	58	3	2	0	0	9	12	0	0	0	0	1.73743	1	6.34685
KCNA7	KCNA7	19	0.773	1.00513e-06	3.51682e-06	5.56364e-06	0	0	1	0	0	0	0	0	0	0	1	0	0	0	0	0	0	0	0	0	0	0	0	0	1	4	16	10	7	16	1	0	0	0	0	0	0	0	0	0	1.04763	21.6136	1
CRY2	CRY2	11	0.59	3.07195e-06	1.73421e-07	1.01243e-05	0	0	0	0	3	0	0	0	0	0	0	0	0	0	0	0	0	0	0	0	0	0	0	0	0	2	1	0	30	45	0	0	0	0	7	8	0	0	0	0	1	1.25301	17.9336
CDAN1	CDAN1	15	0.675	5.56401e-06	3.42767e-06	4.30034e-06	1	0	0	0	0	0	0	0	0	0	0	0	0	0	0	0	0	0	0	0	0	0	0	0	17	9	7	7	17	12	2	1	4	2	0	1	0	0	0	0	5.27071	3.73492	1.13785
TFAP2B	TFAP2B	6	0.259	1.36703e-06	6.47023e-07	9.04548e-06	0	0	0	0	0	0	0	0	1	0	0	0	0	0	0	0	0	0	0	0	0	0	0	0	0	0	2	0	14	10	0	0	0	0	7	2	0	0	0	0	1	17.5476	1.26688
APC2	APC2	19	0.225	4.86035e-06	2.19234e-07	5.68471e-05	0	0	0	0	1	0	0	0	0	0	0	0	0	0	0	0	0	0	1	0	0	0	1	0	1	2	0	0	286	233	0	0	0	0	0	6	0	0	0	0	3.23959	1	6.84925
FAM83F	FAM83F	22	1.434	1.66842e-06	2.2587e-06	2.2424e-06	0	0	0	0	0	0	0	0	0	0	0	0	0	0	0	0	0	0	0	0	0	0	0	0	4	4	27	15	14	7	0	1	0	0	0	0	0	0	0	0	1	17.9852	1.23098
RALA	RALA	7	0.269	1.19953e-06	2.208e-06	1.55644e-06	0	0	1	0	0	0	0	0	0	0	0	0	0	0	0	0	0	0	0	0	0	0	0	0	0	1	3	4	5	1	0	0	2	0	3	0	0	0	0	0	1	18.1719	1.21417
FADS1	FADS1	11	0.445	2.16125e-06	7.28666e-06	6.15209e-06	0	0	0	0	0	0	1	0	0	0	0	0	0	0	0	0	0	0	1	0	0	0	0	0	1	1	8	14	17	22	1	0	0	3	2	3	0	0	0	0	18.0065	1	1
WDFY3	WDFY3	4	0.071	1.74468e-05	8.52192e-06	3.04279e-05	2	0	1	0	1	0	1	0	1	0	0	1	0	0	0	0	0	0	1	0	0	0	1	0	5	3	11	15	114	129	4	0	4	4	15	27	0	0	0	0	15.7047	1.24678	1.12255
ZC3H14	ZC3H14	14	0.342	4.10492e-06	1.21412e-06	5.11031e-06	1	0	0	0	0	0	0	1	0	0	0	0	0	0	0	0	0	0	1	0	0	0	0	0	1	3	1	4	13	18	2	0	0	2	5	8	0	0	0	0	21.9582	1	1
MIB1	MIB1	18	1.973	5.85949e-06	9.21592e-07	1.59644e-05	0	0	0	0	1	0	3	1	0	0	1	0	0	0	0	0	0	0	0	0	0	0	0	0	43	41	0	4	31	25	9	14	1	1	5	15	0	0	0	0	21.386	1	1.0169
FLRT2	FLRT2	14	0.413	1.86963e-06	6.8057e-10	5.3179e-06	1	0	0	0	0	0	0	0	0	0	0	0	1	0	0	0	0	0	0	0	0	0	0	0	0	0	0	0	19	19	0	0	0	0	5	6	0	0	0	0	19.2595	1	1.1257
ACHE	ACHE	7	0.207	2.40312e-06	6.23356e-06	9.17919e-06	0	0	1	0	1	0	0	0	0	0	0	0	0	0	0	0	0	0	0	0	0	0	0	0	0	0	10	9	41	39	0	0	4	1	4	8	0	0	0	0	1	18.1407	1.19029
LRFN4	LRFN4	11	0.387	1.14136e-06	6.77252e-06	6.86409e-06	0	0	0	0	0	0	1	0	0	0	0	0	0	0	0	0	0	0	0	0	0	0	1	0	0	1	32	20	19	16	0	0	1	3	1	1	0	0	0	0	3.66174	4.41568	1.33376
SLC4A8	SLC4A8	12	0.266	4.57459e-06	1.64212e-06	1.66792e-05	0	0	0	0	0	1	0	0	0	0	1	0	0	0	0	0	0	0	0	0	0	0	0	0	2	1	10	6	42	38	1	1	3	0	11	11	0	0	0	0	1	15.9991	1.34511
SIGLEC11	SIGLEC11	19	1.561	2.35455e-06	4.21708e-06	5.30839e-06	0	0	0	0	0	0	0	0	2	0	0	0	0	0	0	0	0	0	0	0	0	0	0	0	1	2	1	1	1	1	0	0	0	1	1	0	0	0	0	0	1	21.4825	1
ELAVL1	ELAVL1	19	0.222	1.26315e-06	4.36454e-06	5.68153e-06	0	0	1	0	0	0	0	0	0	0	1	0	0	0	0	0	0	0	0	0	0	0	0	0	0	0	7	0	7	8	0	0	2	2	1	2	0	0	0	0	1	20.8208	1.03076
TBX21	TBX21	17	0.226	1.83178e-06	5.65546e-06	6.38601e-06	1	0	0	0	0	0	0	0	0	0	0	0	0	0	0	0	1	0	0	0	0	0	0	0	1	0	13	17	31	14	0	0	0	1	0	0	0	0	0	0	7.32491	1.82191	1.60489
CHD7	CHD7	8	0.076	1.34513e-05	2.89264e-06	2.09472e-05	1	0	0	0	2	0	0	0	0	0	2	0	1	0	0	0	0	0	0	0	0	0	0	0	2	1	4	4	65	64	0	0	1	1	17	20	0	0	0	0	6.13393	1	3.45107
KSR2	KSR2	12	0.131	3.99722e-06	1.30513e-06	1.80428e-05	0	0	0	0	0	0	1	0	0	0	1	0	0	0	0	0	0	0	0	0	0	0	0	0	2	1	3	1	50	62	2	0	0	0	6	16	0	0	0	0	14.1496	1.49305	1
SNAP91	SNAP91	6	0.193	3.10646e-06	6.8057e-10	1.59048e-06	0	1	0	0	1	0	1	0	0	0	0	0	0	0	0	0	0	0	0	0	0	0	0	0	2	0	0	0	1	0	0	0	0	0	0	0	0	0	0	0	7.1482	1	1.47942
TMEM245	TMEM245	9	0.593	3.40511e-06	2.02197e-06	6.60405e-06	0	0	1	0	0	0	0	0	0	0	0	0	0	0	0	0	0	0	0	0	0	0	0	0	4	4	19	16	47	50	1	2	0	0	1	1	0	0	0	0	1	18.0143	1.15838
SCAND1	SCAND1	20	1.446	2.24132e-07	2.04452e-06	3.86315e-06	0	0	0	0	0	0	0	0	1	0	0	0	0	0	0	0	0	0	0	0	0	0	0	0	0	0	5	1	16	9	0	0	0	0	0	0	0	0	0	0	1	17.0367	1.22015
CBX5	CBX5	12	0.35	5.98494e-07	1.91939e-06	1.46223e-06	0	0	0	1	0	0	0	0	0	0	0	0	0	0	0	0	0	0	0	0	1	0	0	0	0	0	2	2	10	7	0	0	2	1	2	5	0	0	0	0	1	18.7931	1.10475
MCF2L	MCF2L	13	0.504	5.54877e-06	6.8057e-10	1.34002e-05	0	0	0	0	0	0	1	0	0	0	2	0	0	0	0	0	0	1	0	0	0	0	0	0	9	6	0	0	67	79	4	4	0	0	1	11	0	0	0	0	5.24652	1	3.10213
PI4KA	PI4KA	22	0.461	1.09046e-05	8.04109e-06	2.22817e-05	0	0	0	0	0	0	0	0	0	0	1	0	0	0	0	0	0	0	0	0	0	0	1	1	6	8	12	3	47	41	1	2	5	3	10	26	0	1	0	0	1	20.0423	1.02765
ZBTB45	ZBTB45	19	1.13	1.39305e-06	2.63197e-06	1.01578e-05	1	0	0	0	0	0	1	0	0	0	2	1	0	0	0	0	0	0	0	0	0	0	0	0	2	5	7	0	39	38	1	0	1	0	0	4	0	0	0	0	1.02119	7.24173	2.77531
RNF19A	RNF19A	8	0.473	3.78785e-06	4.3222e-06	2.82537e-06	0	0	1	0	0	0	0	0	0	0	0	0	0	0	0	0	0	0	0	0	0	0	0	0	5	1	7	8	13	5	2	1	2	1	1	2	0	0	0	0	2.91289	5.64939	1.23542
TUBA1A	TUBA1A	12	0.317	1.39397e-06	8.20511e-06	1.60558e-06	0	0	2	0	0	0	0	0	0	0	0	0	0	0	0	0	0	0	0	0	0	0	0	0	0	0	0	0	0	0	0	0	1	1	1	0	0	0	0	0	1	19.6875	1.02972
EPB41L4B	EPB41L4B	9	0.237	4.38884e-06	4.99356e-06	2.41199e-06	0	0	0	0	0	0	0	0	0	0	0	0	0	0	0	0	0	0	1	0	0	0	1	0	1	1	15	21	12	6	2	0	0	0	1	0	0	0	0	0	11.1841	1	1.8065
XRCC6	XRCC6	22	0.218	2.59843e-06	1.20346e-06	6.5974e-06	0	0	1	0	0	0	0	0	0	0	0	0	0	0	0	0	0	0	0	0	0	0	0	0	0	0	1	1	4	10	1	0	2	2	5	5	0	0	0	0	1.60057	12.5866	1
NAGS	NAGS	17	1.141	1.39993e-06	1.67082e-06	1.03497e-05	0	0	0	0	1	0	0	0	0	0	0	0	0	0	0	0	0	0	0	0	0	0	1	0	4	4	11	4	35	33	0	1	2	0	2	3	0	0	0	0	1	16.4959	1.20818
CPE	CPE	4	0.269	2.21937e-06	1.25652e-07	7.80916e-06	0	0	0	0	0	0	1	0	0	0	0	0	0	0	0	0	0	0	0	0	0	0	1	0	0	2	2	0	48	29	1	0	0	0	5	4	0	0	0	0	5.28524	1.59312	2.34877
PM20D1	PM20D1	1	1.397	2.47799e-06	1.5293e-07	1.33235e-06	0	0	0	0	0	0	0	0	0	0	0	0	0	0	0	0	0	0	0	0	1	0	0	0	9	5	1	0	10	4	1	6	0	0	0	3	0	0	0	0	1	17.2697	1.13389
MAP3K10	MAP3K10	19	0.409	2.244e-06	6.73848e-06	1.86379e-05	1	0	1	0	0	0	0	0	0	0	0	0	0	0	0	0	0	0	0	0	0	0	0	0	6	5	27	21	71	68	0	2	3	4	4	6	0	0	0	0	2.01761	7.46741	1.29672
TSC22D1	TSC22D1	13	0.328	2.37867e-06	6.8057e-10	1.76072e-09	0	0	0	0	0	0	0	0	0	0	0	0	0	0	0	0	0	0	1	0	0	0	0	0	2	0	0	0	0	0	2	0	0	0	0	0	0	0	0	0	19.4359	1	1
DNAH2	DNAH2	17	0.563	2.21385e-05	1.22149e-06	2.97712e-05	1	0	0	0	0	0	1	0	0	0	2	0	0	0	0	0	0	0	0	0	0	0	2	0	44	51	0	1	228	187	9	19	0	0	30	34	0	0	0	0	1	1	19.3946
EIF4A2	EIF4A2	3	0.205	1.95087e-06	4.36334e-06	3.5353e-06	0	0	0	0	0	0	0	0	0	0	0	0	0	0	0	0	0	0	0	0	0	0	0	0	0	0	1	0	3	1	1	0	4	0	5	1	0	0	0	0	1.66476	9.90846	1.17413
PTPRE	PTPRE	10	0.474	4.95666e-06	2.19798e-06	6.49152e-06	0	0	0	0	0	0	1	0	0	0	2	0	0	0	0	0	0	0	0	0	0	0	0	0	7	4	4	6	21	21	0	1	2	0	6	10	0	0	0	0	2.07044	1.87771	4.96203
SLC4A10	SLC4A10	2	0.375	5.08061e-06	4.14757e-06	1.153e-05	1	0	0	0	0	0	1	1	0	0	0	0	0	0	0	0	0	0	1	0	0	0	0	0	3	4	8	5	35	31	0	0	2	4	5	5	0	0	0	0	7.30191	1	1.24287
EIF3E	EIF3E	8	0.533	1.84032e-06	3.04561e-06	4.50226e-06	0	0	0	0	0	0	0	0	0	0	0	0	0	0	0	0	0	0	0	0	1	0	0	0	2	1	4	2	5	2	1	0	1	1	1	3	0	0	0	0	1.63739	11.4262	1.01241
AGO3	AGO3	1	0.193	4.49671e-06	8.43612e-06	8.127e-06	0	0	1	0	0	0	0	0	0	0	0	0	0	0	0	0	0	0	0	0	1	0	0	0	1	2	11	11	20	18	0	0	4	2	2	9	0	0	0	0	1	18.9064	1
GDF1	GDF1	19	0.917	4.36957e-07	6.68858e-06	7.94301e-06	0	0	0	0	0	0	1	0	0	0	0	0	0	0	0	0	0	0	0	0	0	0	0	0	1	2	38	26	21	34	0	0	0	0	0	0	0	0	0	0	1.2144	15.4861	1
CYP4F3	CYP4F3	19	1.382	1.75021e-06	1.08879e-06	3.44245e-07	0	0	1	0	0	0	0	0	0	0	0	0	0	0	0	0	0	0	0	0	0	0	0	0	9	8	0	0	0	0	0	1	1	0	0	0	0	0	0	0	1	18.7712	1
LNX2	LNX2	13	0.691	3.42303e-06	9.70693e-07	5.00806e-06	1	0	0	0	0	1	0	0	0	0	0	0	0	0	0	0	0	0	0	0	0	0	0	0	2	2	2	4	24	19	1	0	4	0	4	7	0	0	0	0	1.92574	7.84302	1.23691
SMAD6	SMAD6	15	1.975	9.80595e-07	3.56119e-06	1.11328e-05	0	0	0	0	0	0	1	0	0	0	0	0	0	0	0	1	0	0	2	0	0	0	0	0	6	11	14	10	57	49	1	0	0	0	0	0	0	0	0	0	5.45685	2.32269	1.46907
HNRNPR	HNRNPR	1	0.21	2.42523e-06	3.73785e-06	4.20198e-06	0	0	1	0	0	0	0	0	0	0	0	0	0	0	0	0	0	0	0	0	1	0	0	0	0	0	1	7	8	1	0	0	2	1	2	3	0	0	0	0	1	15.9222	1.16831
EHD1	EHD1	11	0.281	1.3666e-06	2.64034e-06	1.04852e-05	0	0	1	0	0	1	0	0	0	0	0	0	0	0	0	0	0	0	0	0	0	0	0	0	3	0	14	10	33	30	0	0	0	1	5	9	0	0	0	0	1.7342	9.29156	1.15351
ARF4	ARF4	3	0.298	7.18592e-07	1.46881e-06	2.00902e-06	1	0	0	0	0	0	0	0	0	0	0	0	0	0	0	0	0	0	0	0	0	0	1	0	0	0	1	0	5	1	1	0	1	4	0	1	0	0	0	0	11.4471	1	1.61982
BIN1	BIN1	2	0.368	2.85671e-06	3.39058e-06	3.48881e-06	0	0	0	0	0	0	0	0	0	0	0	0	0	0	0	0	0	0	1	0	0	0	0	0	5	4	9	7	9	12	0	1	4	2	1	2	0	0	0	0	3.05525	6.02769	1
TTC13	TTC13	1	0.517	4.79234e-06	1.52675e-06	6.63705e-06	0	0	0	0	0	0	0	1	0	0	1	0	0	0	0	0	0	0	0	0	0	0	1	0	8	1	15	13	23	27	1	1	2	0	2	5	0	0	0	0	2.60483	5.77211	1.2149
CLIC6	CLIC6	21	1.096	1.02699e-06	3.58986e-06	1.10779e-05	0	0	0	0	0	0	0	0	1	0	0	0	0	0	0	0	0	0	0	0	0	0	0	0	1	2	26	21	37	37	0	1	0	0	0	0	0	0	0	0	1	16.7058	1.09227
ZBTB4	ZBTB4	17	0.113	2.60513e-06	6.8057e-10	1.55463e-05	1	0	0	0	0	0	0	0	0	0	0	0	0	0	0	0	0	0	0	0	0	0	0	0	2	0	0	0	77	68	0	0	0	0	11	9	0	0	0	0	9.25955	1	1.96028
PPIG	PPIG	2	0.32	4.34462e-06	2.10652e-06	4.73801e-06	0	1	0	0	2	0	0	0	0	0	0	0	0	0	0	0	0	0	0	0	0	0	0	0	2	0	4	3	8	9	2	0	0	0	0	1	0	0	0	0	2.94866	1.14671	5.36578
TDRD9	TDRD9	14	0.649	6.19365e-06	6.8057e-10	9.04017e-07	0	0	0	0	0	0	0	0	0	0	0	0	0	0	0	0	0	0	0	0	0	0	1	0	26	18	0	0	3	3	6	4	0	0	0	0	0	0	0	0	11.1587	1	1.6123
NR2F1	NR2F1	5	0.191	1.27129e-06	5.86511e-07	2.48833e-06	0	0	0	0	0	0	0	0	0	0	0	0	0	0	0	0	0	0	1	0	0	0	0	0	1	0	0	0	0	0	1	0	0	0	0	0	0	0	0	0	17.9718	1	1
TMED7-TICAM2	TMED7-TICAM2	5	0.795	1.82357e-06	1.67558e-06	2.71209e-06	0	0	1	0	0	0	0	0	0	0	0	0	0	0	0	0	0	0	0	0	0	0	0	0	17	18	7	2	7	7	0	0	0	1	0	0	0	0	0	0	1.17244	15.1893	1.00853
ARHGAP44	ARHGAP44	17	0.22	4.43892e-06	6.58639e-07	8.74543e-06	1	0	0	0	0	0	1	0	0	0	1	0	0	0	0	0	0	0	0	0	0	0	0	0	0	1	2	0	14	18	0	0	0	0	6	2	0	0	0	0	11.2257	1.53805	1.0382
GRIA4	GRIA4	11	0.429	4.69754e-06	5.75799e-06	5.21205e-06	0	0	0	0	0	0	0	0	0	0	0	0	0	0	0	0	0	0	0	0	0	0	0	0	1	0	15	13	14	17	1	2	11	9	4	1	0	0	0	0	1	16.768	1.06465
MCM3AP	MCM3AP	21	0.491	6.7804e-06	3.2684e-06	5.72635e-07	0	0	0	0	0	0	0	0	0	0	0	0	0	0	0	0	0	0	1	0	0	0	0	0	14	14	4	5	3	5	9	7	1	6	0	1	0	0	0	0	17.8505	1	1
SPTBN1	SPTBN1	2	0.088	1.01405e-05	8.87121e-06	3.31615e-05	1	0	1	0	2	0	1	0	1	1	1	0	0	0	0	0	0	0	0	0	0	0	0	0	0	0	17	15	81	98	2	0	5	5	16	26	0	0	0	0	5.48012	3.24263	1
KMT2E	KMT2E	7	0.06	6.29616e-06	6.8057e-10	8.09858e-06	1	0	0	0	0	1	1	0	0	0	0	0	0	0	0	0	0	0	0	0	0	0	0	0	0	0	0	0	34	28	1	0	0	0	5	7	0	0	0	0	13.3993	1	1.32447
PHYHIP	PHYHIP	8	0.439	7.70919e-07	5.46848e-06	4.16834e-06	0	0	0	0	0	0	0	0	0	0	0	0	0	0	0	0	0	0	0	0	1	0	0	0	0	0	16	7	17	12	0	0	2	4	2	5	0	0	0	0	1	15.3326	1.1527
FST	FST	5	0.29	1.30013e-06	3.28013e-06	4.17663e-06	0	0	1	0	0	0	0	0	1	0	0	0	0	0	0	0	0	0	0	0	0	0	0	0	0	0	2	2	31	26	0	0	0	1	2	4	0	0	0	0	1	13.7708	1.27843
LRP2	LRP2	2	0.249	2.36225e-05	6.51511e-07	1.78559e-05	3	0	0	0	0	0	1	0	0	0	0	0	0	0	0	0	0	0	0	0	0	0	0	0	9	5	0	2	40	43	4	2	0	0	13	17	0	0	0	0	15.8949	1	1.10271
PCDH10	PCDH10	4	0.352	2.74934e-06	6.8057e-10	1.76072e-09	1	0	0	0	0	0	0	0	0	0	0	0	0	0	0	0	0	0	0	0	0	0	0	0	3	0	0	0	0	0	2	0	0	0	0	0	0	0	0	0	17.4132	1	1
CACNA1I	CACNA1I	22	0.202	7.11506e-06	1.42762e-05	3.48223e-05	0	0	2	0	0	0	0	0	1	1	2	0	0	0	0	0	0	0	0	0	0	0	0	0	2	2	59	46	150	168	0	2	2	6	15	11	0	0	0	0	1	12.0918	1.42867
ROCK2	ROCK2	2	0.215	7.83163e-06	7.12046e-06	1.04138e-05	0	0	1	1	0	0	0	0	0	0	0	0	0	0	0	0	0	0	0	0	0	0	0	0	2	2	19	14	46	56	0	0	5	2	10	13	0	0	0	0	1	16.143	1.06702
SNED1	SNED1	2	0.332	5.95462e-06	2.45408e-06	2.66503e-05	1	0	0	0	1	1	0	1	0	0	0	0	0	0	0	0	0	1	0	0	0	0	0	0	12	4	1	2	120	110	1	2	0	0	6	12	0	0	0	0	6.99447	1	2.4609
KDM4A	KDM4A	1	0.156	5.50355e-06	1.56011e-06	1.50567e-05	0	0	1	0	0	1	0	0	0	0	0	0	0	0	0	0	0	0	0	0	0	0	0	0	1	3	5	4	58	48	0	0	0	0	11	19	0	0	0	0	1	11.1187	1.54753
SLC7A5	SLC7A5	16	0.514	1.52001e-06	1.48704e-06	1.11865e-05	0	0	0	0	0	0	0	0	0	0	0	0	0	0	0	0	0	0	1	0	0	0	0	0	2	0	6	0	27	27	0	0	1	1	0	8	0	0	0	0	4.12848	4.10816	1
NUP155	NUP155	5	0.323	7.25694e-06	6.8057e-10	1.76072e-09	0	0	0	0	0	0	0	0	0	0	0	0	0	0	0	0	0	0	0	0	0	0	0	0	2	2	0	0	0	0	5	0	0	0	0	0	0	0	0	0	8.19041	1	1
PPP3CA	PPP3CA	4	0.158	2.79758e-06	4.79903e-06	5.57377e-06	0	0	0	0	1	0	0	0	2	0	0	0	0	0	0	0	0	0	0	0	0	0	0	0	0	0	10	6	8	21	0	0	5	10	6	7	0	0	0	0	1	16.8592	1
C11orf30	EMSY	11	0.153	4.98614e-06	6.8057e-10	1.39332e-05	1	0	0	0	0	0	1	0	0	0	0	1	0	0	0	0	0	0	0	0	0	0	0	0	1	0	0	0	46	43	0	0	0	0	4	13	0	0	0	0	15.5616	1	1.07974
KAT8	KAT8	16	0.479	2.02424e-06	4.43778e-06	9.108e-06	0	0	0	0	0	0	0	0	0	0	0	0	0	0	0	0	0	0	0	0	1	0	0	0	2	1	9	8	17	26	0	0	3	2	1	3	0	0	0	0	1.09762	15.1958	1
SPEG	SPEG	2	0.293	1.1998e-05	1.70974e-06	7.09878e-05	0	0	0	0	3	0	0	1	1	0	1	0	0	0	0	0	0	0	0	0	0	0	0	0	5	6	13	13	305	341	2	4	1	0	19	39	0	0	0	0	1	15.0524	1.10492
POU2F2	POU2F2	19	0.197	1.71118e-06	4.88958e-06	6.09293e-07	0	0	0	0	0	0	0	0	0	0	0	0	0	0	0	0	0	0	0	0	0	0	0	0	0	0	11	3	4	3	0	0	3	1	0	3	0	0	0	0	1	16.4621	1
METTL16	METTL16	17	0.405	2.94917e-06	3.3877e-06	3.1021e-06	0	0	1	0	0	0	0	0	0	0	0	0	0	0	0	0	0	0	0	0	0	0	1	0	1	2	7	6	10	9	1	0	1	0	2	5	0	0	0	0	1.08915	10.2138	1.4767
SAP30BP	SAP30BP	17	0.793	1.96042e-06	1.59431e-07	5.18246e-06	0	0	1	0	0	0	0	0	0	0	0	0	0	0	0	0	0	0	0	0	0	0	0	0	2	3	0	0	20	23	2	2	0	0	3	3	0	0	0	0	1.16731	13.5092	1.03885
DGKD	DGKD	2	0.366	6.14809e-06	6.8057e-10	1.88064e-05	1	0	0	0	0	0	0	0	0	0	0	0	0	0	0	0	0	0	0	0	0	0	1	0	7	4	0	0	87	74	2	0	0	0	13	21	0	0	0	0	8.42218	1	1.94076
PSD	PSD	10	0.337	4.21581e-06	5.93554e-06	3.27323e-06	0	0	1	1	0	0	0	0	2	0	0	0	0	0	0	0	0	0	0	0	0	0	0	0	0	1	24	21	7	10	1	0	5	9	1	1	0	0	0	0	1	16.2799	1
MOB4	MOB4	2	0.367	9.1383e-07	1.75491e-06	2.15582e-06	0	0	0	0	1	0	0	0	0	0	0	0	0	0	0	0	0	0	0	0	1	0	0	0	1	0	0	0	3	3	0	0	0	0	0	2	0	0	0	0	1.15652	10.4532	1.34487
ARID3A	ARID3A	19	0.276	2.144e-06	2.09411e-06	1.12538e-06	0	0	0	0	0	0	0	0	0	0	0	0	0	0	0	0	1	0	0	0	0	0	0	0	1	0	2	1	2	4	0	0	0	0	1	2	0	0	0	0	1.07944	15.0108	1
PIM1	PIM1	6	0.42	1.22087e-06	1.71359e-06	5.92193e-06	0	0	1	0	0	0	0	0	0	0	0	0	0	0	0	0	0	0	0	0	0	0	0	0	0	0	1	0	9	16	1	0	0	0	3	3	0	0	0	0	1.60844	10.0476	1
PDCD6	PDCD6	5	0.945	9.10027e-07	8.14221e-07	3.31096e-06	0	0	0	0	1	0	0	0	1	0	0	0	0	0	0	0	0	0	0	0	0	0	0	0	1	5	0	0	27	30	0	0	0	0	3	1	0	0	0	0	1	10.8049	1.49313
RPL15	RPL15	3	0.272	1.23828e-06	2.00318e-06	4.69225e-06	0	0	1	0	0	0	0	0	0	0	1	0	0	0	0	0	0	0	0	0	0	0	0	0	0	0	0	0	0	0	0	0	1	0	1	3	0	0	0	0	1	14.0493	1.14095
NPR1	NPR1	1	0.483	4.17444e-06	2.00546e-06	2.09909e-05	0	0	0	0	0	0	0	0	0	0	0	0	0	0	0	0	0	0	0	0	0	0	0	0	5	3	9	2	123	111	1	0	1	1	7	21	0	0	0	0	1.69541	5.00754	1.87637
GNAI1	GNAI1	7	0.379	1.43583e-06	2.69885e-06	3.92808e-06	0	0	2	0	0	0	0	0	0	0	0	0	0	0	0	0	0	0	0	0	0	0	0	0	0	0	2	5	11	10	0	0	0	2	0	2	0	0	0	0	1	15.9055	1
EYA2	EYA2	20	0.467	2.49809e-06	3.83846e-06	2.46804e-06	0	0	0	0	0	0	0	0	1	0	0	0	0	0	0	0	0	0	0	0	0	0	0	0	0	2	34	27	8	9	0	0	1	2	0	1	0	0	0	0	1	15.8845	1
GPR85	GPR85	7	0.513	7.66078e-07	8.675e-08	3.86138e-06	0	0	1	0	0	0	0	0	0	0	0	0	0	0	0	0	0	0	0	0	0	0	0	0	0	0	0	0	10	9	0	0	0	0	5	4	0	0	0	0	1	13.7953	1.14472
RUFY3	RUFY3	4	0.458	3.54547e-06	3.6138e-06	2.92449e-06	0	0	1	0	1	0	0	0	0	0	0	0	0	0	0	0	0	0	0	0	0	0	0	0	2	2	7	4	23	23	0	0	2	2	1	4	0	0	0	0	1	10.988	1.43376
JAK1	JAK1	1	0.214	5.21494e-06	6.58053e-06	1.28033e-05	0	0	0	0	0	0	0	0	0	1	0	0	0	0	0	0	0	1	0	0	0	0	0	0	0	2	12	11	62	81	0	1	8	5	9	11	0	0	0	0	1	10.9631	1.42654
DAB2IP	DAB2IP	9	0.2	3.69455e-06	2.67009e-06	1.77475e-05	0	0	0	0	3	0	0	0	0	0	1	0	0	0	0	0	0	0	0	0	0	0	0	0	1	1	10	12	78	67	0	0	3	6	11	19	0	0	0	0	1	1	15.6208
SHKBP1	SHKBP1	19	0.718	3.3361e-06	8.69106e-07	8.3551e-06	0	0	0	0	0	0	0	0	0	0	0	0	0	0	0	0	1	1	0	0	0	0	1	0	12	12	0	2	73	83	0	2	0	0	3	13	0	0	0	0	1	8.34981	1.87058
ZDHHC24	ZDHHC24	11	1.412	6.85041e-07	9.84182e-07	2.1768e-06	0	0	0	0	0	0	0	0	1	0	0	0	0	0	0	0	0	0	0	0	0	0	0	0	2	6	3	1	3	10	0	0	0	0	0	0	0	0	0	0	1	15.6165	1
TMX3	TMX3	18	0.587	2.24684e-06	6.8057e-10	1.97303e-06	0	0	0	0	0	0	0	0	0	0	0	0	0	0	0	0	0	0	0	0	0	0	2	0	3	6	0	0	3	5	0	0	0	0	2	0	0	0	0	0	1	1	9.33571
GCH1	GCH1	14	0.398	1.15573e-06	2.31315e-06	5.4471e-06	0	0	0	0	0	0	0	0	0	0	0	1	0	0	0	0	0	0	0	0	0	0	0	0	0	0	23	14	16	16	0	0	1	0	3	3	0	0	0	0	1	14.5203	1.07455
MGAT5B	MGAT5B	17	0.469	3.17312e-06	3.43601e-06	8.92175e-06	0	0	0	0	0	0	0	0	0	0	0	0	0	0	0	0	0	0	0	0	0	0	1	0	1	1	34	21	45	35	0	3	1	3	4	1	0	0	0	0	1	8.614	1.81034
GALR3	GALR3	22	1.71	4.69955e-07	4.1101e-06	8.86082e-06	0	0	0	0	0	0	0	0	0	0	0	0	0	0	0	0	0	0	0	0	0	0	0	0	0	0	25	13	12	12	0	0	0	0	0	0	0	0	0	0	1	15.5084	1
NPAS3	NPAS3	14	0.211	3.41365e-06	2.86203e-06	2.22067e-05	1	0	0	0	1	0	0	0	0	0	0	0	0	0	0	0	0	0	0	0	0	0	0	0	1	5	4	3	99	101	1	0	3	1	8	13	0	0	0	0	2.81403	4.04012	1.36278
RORA	RORA	15	0.404	3.43308e-06	3.07052e-06	5.42509e-06	0	0	0	0	1	0	0	0	1	0	0	0	0	0	0	0	0	0	0	0	0	0	0	0	1	0	5	3	18	21	1	0	2	2	3	3	0	0	0	0	1.46521	9.12999	1.15673
SLC2A14	SLC2A14	12	0.604	1.52894e-06	1.8939e-06	3.89568e-06	0	0	0	0	0	0	0	0	0	0	0	0	0	0	0	0	0	0	0	0	0	0	0	0	0	0	0	0	4	3	3	2	4	1	2	4	0	0	0	0	2.05488	7.51987	1
RCCD1	RCCD1	15	1.536	1.45646e-06	1.33318e-06	4.48625e-06	0	0	0	0	0	0	0	0	0	0	0	0	0	0	0	0	0	0	0	0	0	0	0	0	17	22	23	12	9	6	0	0	0	0	0	0	0	0	0	0	1	14.508	1.06316
VCL	VCL	10	0.396	5.49986e-06	5.9522e-06	1.55661e-05	1	0	0	0	0	1	1	0	0	0	0	0	0	0	0	0	0	0	0	0	0	0	1	0	6	4	16	21	85	76	1	1	1	2	17	30	0	0	0	0	8.24148	1	1.87002
CALM3	CALM3	19	0.357	7.36531e-07	1.62612e-06	1.84416e-06	0	0	0	0	0	0	0	0	0	0	0	0	0	0	0	0	0	0	0	0	1	0	0	0	0	0	2	0	0	1	0	0	0	0	0	1	0	0	0	0	1	15.4078	1
FOXP2	FOXP2	7	0.219	4.94829e-06	9.4297e-07	3.5616e-06	1	0	1	0	0	0	0	0	0	0	1	0	0	0	0	0	0	0	0	0	0	0	0	0	0	2	0	0	7	7	1	0	0	2	5	1	0	0	0	0	2.6599	3.9845	1.45358
GRID2IP	GRID2IP	7	0.42	3.51499e-06	6.8057e-10	6.19485e-07	1	0	0	0	0	0	0	0	0	0	0	0	1	0	0	0	0	0	0	0	0	0	0	0	8	8	0	0	7	6	0	0	0	0	0	0	0	0	0	0	14.4734	1	1.05925
UBE2H	UBE2H	7	0.355	1.24386e-06	2.12157e-06	1.96464e-06	0	1	0	0	0	0	0	0	1	0	0	1	0	0	0	0	0	0	0	0	0	0	0	0	0	0	0	0	4	1	0	0	0	0	1	2	0	0	0	0	1	7.29691	1.06416
TRIO	TRIO	5	0.139	1.44752e-05	1.12951e-05	3.19482e-05	1	0	1	0	2	0	0	0	2	0	0	0	0	0	0	0	0	0	1	0	0	0	0	0	3	1	22	41	104	106	4	0	13	11	15	27	0	0	0	0	7.22258	1.68972	1.24468
TWF2	TWF2	3	0.302	1.93931e-06	6.8057e-10	4.47558e-06	1	0	0	0	0	0	0	0	0	0	0	1	0	0	0	0	0	0	0	0	0	0	0	0	4	1	0	0	13	22	0	0	0	0	3	9	0	0	0	0	9.03013	1	1
LRRC37B	LRRC37B	17	0.474	3.51934e-06	2.65454e-06	4.48397e-06	0	0	0	0	0	0	0	0	0	0	0	0	0	0	0	0	0	0	0	0	0	0	0	0	24	17	0	0	13	12	0	0	3	1	1	6	0	0	0	0	4.02997	3.74928	1
SEC24D	SEC24D	4	0.584	4.51279e-06	6.8057e-10	1.76072e-09	0	0	0	0	0	0	0	0	0	0	0	0	0	0	0	0	0	0	0	0	0	0	0	0	16	6	0	0	0	0	4	1	0	0	0	0	0	0	0	0	15.0258	1	1
C20orf112	NOL4L	20	0.191	1.28235e-06	3.60733e-06	1.44973e-06	1	0	0	0	0	0	0	0	0	0	0	1	0	0	0	0	0	0	0	0	0	0	0	0	0	0	2	2	6	4	1	0	3	4	0	0	0	0	0	0	14.0565	1	1.06327
GCK	GCK	7	0.443	1.50889e-06	7.75142e-06	7.21011e-06	0	0	0	0	0	0	0	0	2	0	0	0	0	0	0	0	0	0	0	0	0	0	0	0	0	1	13	13	23	14	0	1	3	4	5	2	0	0	0	0	1	10.4058	1.43547
FZR1	FZR1	19	0.172	2.31502e-06	7.55733e-06	5.47783e-06	0	0	0	0	0	0	0	0	1	0	0	0	0	0	0	0	1	0	0	0	1	0	0	0	2	0	7	12	29	28	0	0	0	1	2	1	0	0	0	0	1.33701	9.39832	1.18534
NR1H3	NR1H3	11	0.373	1.6822e-06	6.8057e-10	8.35858e-06	1	0	0	0	1	0	0	0	0	0	0	0	0	0	0	0	0	0	1	0	0	0	0	0	5	4	0	0	36	34	0	2	0	0	5	6	0	0	0	0	11.897	1	1.24496
AK4	AK4	1	0.788	8.41152e-07	1.39293e-06	3.67998e-06	0	0	0	0	0	0	0	0	0	0	0	0	0	0	0	0	0	0	0	0	0	0	0	0	1	1	2	0	4	1	0	0	5	2	3	3	0	0	0	0	1	13.555	1.09215
LHFPL3	LHFPL3	7	0.35	7.18575e-07	8.52254e-07	5.51609e-06	0	0	0	0	1	0	0	1	0	0	0	0	0	0	0	0	0	0	0	0	0	0	0	0	1	0	0	1	26	23	0	0	4	0	1	2	0	0	0	0	1.17245	9.70383	1.30059
CYP4A11	CYP4A11	1	1.643	2.17733e-06	5.67691e-07	2.89963e-07	0	0	0	0	0	0	0	0	0	0	0	0	0	0	0	0	0	0	0	0	1	0	0	0	0	1	0	0	0	0	0	3	1	1	0	0	0	0	0	0	1	14.7671	1
SYMPK	SYMPK	19	0.179	5.04493e-06	1.97268e-07	1.87273e-05	0	0	0	0	0	0	1	0	0	0	0	0	0	0	0	0	0	0	0	0	0	0	2	0	3	2	0	0	49	35	0	0	0	0	5	12	0	0	0	0	3.74973	1	3.9289
UBE2R2	UBE2R2	9	0.255	8.29226e-07	2.31577e-06	2.7564e-06	0	0	1	0	0	0	0	0	0	0	0	0	0	0	0	0	0	0	0	0	0	0	0	0	0	0	1	0	6	5	0	0	1	0	2	2	0	0	0	0	1	13.8915	1.05528
TNK2	TNK2	3	0.802	3.83022e-06	6.8057e-10	1.11429e-05	0	0	0	0	1	0	0	0	0	0	0	0	0	0	0	0	0	0	0	0	0	0	2	0	11	8	0	0	62	47	2	1	0	0	8	15	0	0	0	0	1.81254	1	8.07492
ECE1	ECE1	1	0.321	3.32219e-06	3.52074e-07	1.49233e-05	1	0	0	0	0	0	0	0	0	0	1	1	0	0	0	0	0	0	0	0	0	0	0	0	2	0	0	0	84	51	1	1	0	0	6	12	0	0	0	0	5.25219	1	2.77858
IWS1	IWS1	2	0.267	3.96372e-06	3.15989e-06	3.60803e-06	2	0	0	0	0	0	0	0	0	0	0	0	0	0	0	0	0	0	0	0	0	0	0	0	1	1	10	7	22	17	0	2	1	3	1	3	0	0	0	0	12.1525	1	1.19457
UNC79	UNC79	14	0.147	1.11091e-05	8.39572e-06	2.73144e-05	1	0	0	0	0	0	0	0	0	1	1	1	0	0	0	0	1	0	0	0	0	0	0	0	1	0	47	47	125	92	0	2	0	2	23	15	0	0	0	0	1	2.87069	5.05023
SIDT2	SIDT2	11	0.667	4.39269e-06	6.8057e-10	1.72295e-05	0	0	0	0	0	0	0	0	0	0	0	0	0	0	0	0	0	0	2	0	0	0	0	0	3	4	0	0	84	71	1	2	0	0	13	22	0	0	0	0	7.52418	1	1.92601
MIA3	MIA3	1	0.354	6.91055e-06	1.39264e-06	1.76837e-06	0	0	0	0	0	0	0	0	0	0	0	0	0	0	0	0	0	0	0	0	0	0	0	0	8	10	6	4	8	4	5	3	3	1	0	0	0	0	0	0	2.07574	6.23667	1.11881
CAMK4	CAMK4	5	0.474	1.50916e-06	1.38718e-06	5.70208e-06	0	0	0	0	0	1	0	0	0	0	0	0	0	0	0	0	0	0	0	0	1	0	0	0	1	0	3	4	24	28	1	0	0	0	5	11	0	0	0	0	1.71194	8.42753	1
SIN3B	SIN3B	19	0.195	4.01464e-06	5.05611e-06	1.58403e-05	0	0	1	0	1	0	0	0	0	0	0	0	0	0	0	0	0	0	0	0	0	0	0	0	0	1	10	3	31	48	0	0	1	1	7	9	0	0	0	0	1	14.4052	1
PPP1CA	PPP1CA	11	0.274	1.4598e-06	4.55923e-06	3.35003e-06	0	0	0	0	0	0	0	0	1	0	0	0	0	0	0	0	0	0	0	0	0	0	0	0	0	1	12	3	6	6	0	0	1	2	1	1	0	0	0	0	1	14.3507	1.00297
ARID5B	ARID5B	10	0.11	3.4448e-06	3.17539e-06	1.39668e-05	1	0	0	0	0	0	0	0	0	0	0	0	0	0	0	0	0	0	0	0	0	0	0	0	1	0	5	8	78	75	1	0	2	2	13	21	0	0	0	0	8.93735	1	1.60525
OSBP	OSBP	11	0.26	4.85415e-06	7.36118e-06	8.20038e-06	0	0	0	0	0	0	0	0	2	0	0	0	0	0	0	0	0	0	0	0	0	0	0	0	2	0	33	27	30	33	0	0	2	6	3	3	0	0	0	0	1.12436	12.1102	1.05355
PSMC5	PSMC5	17	0.355	1.83279e-06	5.26798e-06	4.69883e-06	0	0	1	0	0	0	0	0	0	0	2	0	0	0	0	0	0	0	0	0	0	0	0	0	0	1	2	2	24	25	0	0	1	1	0	3	0	0	0	0	1	2.52552	5.66137
CABLES1	CABLES1	18	0.63	2.21586e-06	3.28107e-06	2.00907e-05	0	0	1	0	0	0	0	0	0	0	0	0	0	0	0	0	0	0	0	0	0	0	0	0	1	1	20	23	77	77	0	2	3	1	7	14	0	0	0	0	1	11.7309	1.21872
PPP2R2C	PPP2R2C	4	0.376	1.78706e-06	6.30821e-06	6.49362e-06	0	0	0	0	0	0	0	0	0	0	0	0	0	0	0	0	0	0	0	0	0	0	2	0	1	0	7	4	25	31	0	0	2	1	4	9	0	0	0	0	1.09812	2.22643	5.8325
PDXDC1	PDXDC1	16	0.846	3.17044e-06	8.68245e-07	1.13846e-07	0	0	1	0	0	0	0	0	0	0	0	0	0	0	0	0	0	0	0	0	0	0	0	0	2	0	0	0	0	0	1	0	0	0	0	0	0	0	0	0	1.28459	11.0831	1
RNF220	RNF220	1	0.202	2.6862e-06	1.26046e-06	9.91747e-06	0	0	0	0	0	0	1	0	0	0	0	0	0	0	0	0	0	0	0	0	0	0	0	0	2	1	3	3	65	63	1	0	0	2	5	9	0	0	0	0	10.1612	1	1.3977
ERBB2	ERBB2	17	0.397	6.41492e-06	6.4562e-06	1.18362e-05	0	0	0	0	0	0	0	0	0	0	0	1	0	0	0	0	1	0	0	0	0	0	0	0	7	1	13	13	79	65	1	1	2	4	8	14	0	0	0	0	2.04477	3.51709	1.9692
PRKD2	PRKD2	19	0.189	3.29071e-06	8.00267e-06	1.32718e-05	0	0	1	0	1	0	0	0	1	0	0	0	0	0	0	0	0	0	0	0	0	0	0	0	0	0	16	9	54	47	0	1	7	10	11	8	0	0	0	0	1	8.25062	1.70919
ALPK3	ALPK3	15	0.911	5.997e-06	2.29863e-06	8.68824e-06	0	0	1	0	0	0	0	0	0	0	0	0	0	0	0	0	0	0	0	0	0	0	0	0	12	11	15	17	34	20	8	9	0	0	0	1	0	0	0	0	1.92848	5.11858	1.4278
RAB11FIP2	RAB11FIP2	10	0.351	1.56797e-06	1.27539e-06	3.2151e-07	0	0	1	0	0	0	0	0	0	0	0	0	0	0	0	0	0	0	0	0	0	0	0	0	3	2	2	5	1	1	0	0	3	2	0	0	0	0	0	0	1.15548	12.1393	1.00209
GNPTAB	GNPTAB	12	0.821	5.61845e-06	6.8057e-10	1.43155e-06	0	0	0	0	0	0	3	0	0	0	1	1	0	0	0	0	0	0	0	0	0	0	0	0	29	36	0	0	2	5	3	13	0	0	0	0	0	0	0	0	14.0447	1	1
RFWD2	COP1	1	0.202	4.43138e-06	2.30789e-06	7.28794e-06	0	0	1	0	1	0	0	0	0	0	0	0	0	0	0	0	0	0	0	0	0	0	0	0	0	0	4	1	33	38	0	1	0	0	5	10	0	0	0	0	1	13.5621	1.03351
BBS2	BBS2	16	1.066	4.38766e-06	6.8057e-10	2.20305e-06	0	0	0	0	0	0	1	0	0	0	0	0	0	0	0	0	0	2	0	0	0	0	0	0	23	12	0	0	10	8	3	3	0	0	1	4	0	0	0	0	1.22437	1	11.4007
FOXO1	FOXO1	13	0.173	1.65441e-06	5.14546e-06	5.22091e-06	1	0	0	0	0	0	0	0	0	0	0	0	0	0	0	0	0	0	0	0	0	0	0	0	1	0	21	19	21	20	0	0	0	0	0	0	0	0	0	0	8.73195	1.46375	1.08926
CCDC6	CCDC6	10	0.43	2.15924e-06	4.37858e-06	4.71701e-06	0	0	0	0	0	0	0	0	0	0	0	0	0	0	0	0	1	0	0	0	0	0	0	0	1	0	7	3	23	19	0	1	0	1	0	2	0	0	0	0	1	12.2468	1.13296
CLIP2	CLIP2	7	0.196	3.92855e-06	6.43772e-07	1.38176e-05	0	0	0	0	1	0	0	0	1	0	1	0	0	0	0	0	0	0	0	0	0	0	1	0	1	0	1	0	36	55	0	0	0	0	3	7	0	0	0	0	1	13.8625	1
TEK	TEK	9	0.179	5.29199e-06	3.17722e-06	1.31212e-06	0	1	0	0	1	0	0	0	0	0	0	0	0	0	0	0	0	0	0	0	0	0	0	0	2	3	16	13	5	3	3	0	3	3	4	2	0	0	0	0	2.84469	2.75587	1.76577
NRXN2	NRXN2	11	0.258	6.00487e-06	6.06094e-06	3.07923e-05	0	0	0	0	0	0	0	0	0	0	0	2	0	0	0	0	0	0	0	0	1	0	0	0	0	2	15	9	172	141	2	1	4	8	12	23	0	0	0	0	1	3.6583	3.76574
PSMA2	PSMA2	7	0.284	1.5979e-06	1.56889e-06	2.49893e-06	0	0	0	0	0	0	0	0	0	0	0	0	0	0	0	0	0	0	0	0	1	0	0	0	1	0	1	0	2	7	0	0	0	0	0	1	0	0	0	0	1.11719	12.3194	1
FURIN	FURIN	15	0.191	3.62805e-06	4.48477e-06	7.34114e-06	1	0	0	0	0	0	0	0	0	0	0	0	0	0	0	0	0	0	0	0	0	0	0	1	0	0	6	6	51	54	0	0	2	0	3	5	0	0	0	0	5.10812	2.26455	1.1867
SIX2	SIX2	2	0.338	6.63183e-07	4.63434e-06	2.79337e-06	1	0	0	0	0	0	0	0	0	0	1	0	0	0	0	0	0	0	0	0	0	0	0	0	2	1	3	1	30	20	0	0	1	2	2	3	0	0	0	0	7.02901	1	1.9513
GARNL3	GARNL3	9	0.501	5.09317e-06	6.8057e-10	1.38284e-05	1	0	0	0	0	0	0	0	0	0	2	0	0	0	0	0	0	0	0	0	0	0	0	0	8	4	0	0	57	52	0	0	0	0	11	12	0	0	0	0	3.69253	1	3.66531
FBXO22	FBXO22	15	0.296	1.38517e-06	6.8057e-10	5.21461e-06	0	0	0	0	0	0	0	0	0	0	1	0	0	0	0	0	0	0	1	0	0	0	0	0	10	8	0	0	16	16	0	0	0	0	4	1	0	0	0	0	10.4058	1	1.2996
HDAC7	HDAC7	12	0.239	4.37309e-06	1.63552e-06	8.64883e-06	0	0	0	1	0	0	1	0	0	0	2	0	0	0	0	0	0	0	0	0	0	0	0	0	1	2	4	5	34	25	0	0	0	0	3	2	0	0	0	0	2.6489	1	5.10477
FAM169A	FAM169A	5	0.232	2.89608e-06	6.8057e-10	5.75396e-07	1	0	0	0	0	0	0	0	0	0	0	0	0	0	0	0	0	0	0	0	0	0	0	0	3	0	0	0	1	1	1	0	0	0	0	0	0	0	0	0	13.5076	1	1
CELF6	CELF6	15	0.645	1.99693e-06	4.34853e-06	8.51212e-06	0	0	0	0	0	0	2	0	0	0	0	0	0	0	0	0	0	0	0	0	0	0	0	0	1	1	8	10	22	18	0	0	0	3	0	0	0	0	0	0	12.0737	1	1.11816
FAM189B	FAM189B	1	0.751	2.75605e-06	2.44113e-06	4.9809e-06	0	0	0	0	0	0	0	0	0	0	0	0	0	0	0	0	0	0	0	0	0	0	0	0	34	29	15	8	34	24	0	2	0	0	5	3	0	0	0	0	1.69165	4.96133	1.60802
ZNF335	ZNF335	20	0.501	5.60857e-06	6.8057e-10	1.76072e-09	0	0	0	0	0	0	0	0	0	0	0	0	0	0	0	0	0	0	0	0	0	0	0	0	24	13	0	0	0	0	2	0	0	0	0	0	0	0	0	0	13.4848	1	1
GGT7	GGT7	20	0.303	2.85035e-06	3.40638e-06	6.71991e-06	0	0	1	0	0	0	0	0	0	0	0	0	0	0	0	0	0	0	0	0	0	0	0	0	0	1	7	5	16	12	0	0	1	0	2	6	0	0	0	0	1	12.6949	1.0598
KATNB1	KATNB1	16	0.609	3.49238e-06	1.73414e-06	4.69751e-06	0	0	1	0	0	0	0	0	0	1	0	0	0	0	0	0	0	0	0	0	0	0	0	0	0	4	2	1	10	6	0	1	2	2	1	5	0	0	0	0	1	13.0093	1.03382
ZNF638	ZNF638	2	0.169	7.81153e-06	6.8057e-10	1.76072e-09	0	0	0	0	0	0	2	0	0	0	0	0	0	0	0	0	0	0	0	0	0	0	0	0	2	3	0	0	0	0	0	0	0	0	0	0	0	0	0	0	13.4415	1	1
KIRREL3	KIRREL3	11	0.318	3.09741e-06	6.8057e-10	1.6032e-05	0	0	0	0	3	0	0	0	0	0	0	1	0	0	0	0	0	0	0	0	0	0	0	0	2	0	0	0	107	111	1	2	0	0	3	15	0	0	0	0	1	1	13.3868
SRP54	SRP54	14	0.219	2.34835e-06	3.41498e-06	4.85606e-06	0	0	0	0	0	0	1	0	0	0	0	0	0	0	0	0	0	0	0	0	0	0	0	0	0	0	1	3	12	8	0	0	2	1	2	6	0	0	0	0	6.16535	1	1.0653
TRAF7	TRAF7	16	0.456	3.30176e-06	5.77574e-06	9.76792e-06	0	0	1	0	1	0	0	0	1	0	0	0	0	0	0	0	0	0	0	0	0	0	0	0	0	0	12	10	44	55	0	0	0	0	0	6	0	0	0	0	1	13.3533	1
SF3B3	SF3B3	16	0.178	6.85963e-06	1.21696e-05	1.14537e-05	0	0	0	0	0	1	0	0	0	0	0	0	0	0	0	0	0	0	0	0	0	0	0	0	2	0	24	9	36	28	2	0	2	4	5	14	0	0	0	0	2.32407	4.73139	1.19688
STMN2	STMN2	8	0.259	1.08054e-06	1.11126e-06	2.34725e-06	0	0	1	0	0	0	0	0	0	0	0	0	0	0	0	0	0	0	0	0	0	0	0	0	1	0	2	4	9	14	0	0	1	0	1	0	0	0	0	0	1.1566	11.3542	1
MEF2D	MEF2D	1	0.243	2.23143e-06	2.64716e-06	5.24963e-06	0	0	1	0	0	1	0	0	0	0	0	0	0	0	0	0	0	0	0	0	0	0	0	0	1	0	1	2	19	15	1	0	2	2	8	10	0	0	0	0	1.74476	5.84792	1.28336
NDST1	NDST1	5	0.187	3.96975e-06	9.99237e-07	1.94421e-05	0	0	0	0	0	0	0	0	1	0	0	1	0	0	0	0	0	0	0	0	0	0	0	0	3	2	2	2	112	80	1	0	1	4	17	31	0	0	0	0	1.46848	2.66311	3.34722
KDM3A	KDM3A	2	0.219	6.66549e-06	3.58371e-06	3.34002e-06	1	0	0	0	0	0	0	0	0	0	0	0	0	0	0	0	0	0	0	0	0	0	0	0	2	2	22	13	6	7	1	0	4	6	1	8	0	0	0	0	2.60016	5.02957	1
ACSF2	ACSF2	17	0.654	2.84381e-06	6.8057e-10	8.97499e-06	0	0	0	0	0	0	0	0	0	0	0	0	0	0	0	0	0	0	0	0	0	0	0	0	26	10	0	0	51	39	0	0	0	0	7	13	0	0	0	0	8.00658	1	1.6226
EPB41L1	EPB41L1	20	0.343	3.47144e-06	1.7596e-06	8.37278e-06	0	0	0	0	2	0	0	0	0	0	0	0	0	0	0	0	0	0	0	0	0	0	0	0	2	0	3	1	25	17	1	0	1	1	2	6	0	0	0	0	1.81195	1.55865	4.59998
GAK	GAK	4	0.408	5.10758e-06	1.77742e-06	4.68619e-07	0	0	1	0	0	0	0	0	0	0	0	0	0	0	0	0	0	0	0	0	0	0	0	0	4	4	5	3	0	0	0	0	0	0	0	0	0	0	0	0	1	12.973	1
THRB	THRB	3	0.223	1.99191e-06	4.54942e-06	3.98499e-06	1	0	0	0	0	0	0	0	0	1	0	0	0	0	0	0	0	0	0	0	0	0	0	0	0	0	2	5	8	17	1	1	5	3	2	1	0	0	0	0	6.99032	1.85446	1
MBD6	MBD6	12	0.209	2.87279e-06	6.8057e-10	1.76072e-09	0	0	0	0	0	0	1	0	0	0	0	0	0	0	0	0	0	0	0	0	0	0	0	0	3	4	0	0	0	0	1	0	0	0	0	0	0	0	0	0	6.37925	1	1
INSIG2	INSIG2	2	0.771	1.06245e-06	3.38445e-07	2.98202e-06	0	0	0	0	0	0	0	0	1	0	0	0	0	0	0	0	0	0	0	0	0	0	0	0	2	0	0	1	14	12	0	0	0	0	2	2	0	0	0	0	1.16042	9.8606	1.13007
USP39	USP39	2	0.541	2.47749e-06	4.92112e-06	3.67392e-06	0	0	0	0	1	0	0	0	1	0	0	0	0	0	0	0	0	0	0	0	0	0	0	0	3	4	10	7	9	14	3	1	3	4	3	1	0	0	0	0	2.2809	4.56956	1.23765
CRHR1	CRHR1	17	0.714	2.19978e-06	3.61633e-07	6.99998e-06	0	0	0	0	2	0	0	0	0	0	0	0	0	0	0	0	0	0	0	0	0	0	0	0	2	1	0	0	51	43	0	0	1	0	2	5	0	0	0	0	1.06307	1.87644	6.46254
ZC3H18	ZC3H18	16	0.126	4.94493e-06	2.88522e-07	5.70755e-06	0	0	0	0	0	0	0	0	0	0	0	0	0	0	0	1	0	0	0	0	0	0	0	0	0	0	0	0	35	34	0	0	0	0	2	9	0	0	0	0	11.7942	1	1.09283
KMT2B	KMT2B	19	0.07	1.07255e-05	1.4741e-05	1.78675e-05	1	0	0	0	0	0	0	0	0	0	0	0	0	0	0	0	0	0	0	0	0	0	0	0	0	0	10	13	59	58	0	0	9	3	4	7	0	0	0	0	1.44227	7.74641	1.14933
SUPT6H	SUPT6H	17	0.087	1.05113e-05	6.10859e-06	2.21021e-05	0	0	0	0	0	0	0	0	1	0	0	0	0	0	0	0	0	0	0	0	0	0	1	0	0	0	8	5	83	88	0	0	4	3	18	23	0	0	0	0	1	9.09763	1.411
TRIP11	TRIP11	14	0.504	9.28637e-06	6.8057e-10	1.76072e-09	1	0	0	0	0	0	0	0	0	0	0	0	0	0	0	0	0	0	1	0	0	0	0	0	24	14	0	0	0	0	4	6	0	0	0	0	0	0	0	0	12.8332	1	1
GATA4	GATA4	8	0.527	1.35595e-06	4.32652e-06	4.72014e-06	0	0	1	0	0	0	0	0	0	0	0	0	0	0	0	0	0	0	0	0	0	0	0	0	1	0	7	15	13	12	1	0	4	0	2	0	0	0	0	0	1.67567	6.93864	1.09968
JTB	JTB	1	0.657	8.18221e-07	1.72681e-07	2.11139e-06	0	0	0	0	0	0	0	0	0	0	0	0	0	0	0	0	0	0	0	0	0	0	0	0	1	0	24	14	10	11	0	1	0	0	1	3	0	0	0	0	1	12.6831	1
LFNG	LFNG	7	0.69	9.63293e-07	2.7965e-06	8.58167e-06	0	0	0	0	0	0	0	0	0	0	0	0	0	0	0	0	0	0	0	0	0	0	2	0	8	2	12	10	25	38	0	0	0	0	1	1	0	0	0	0	1.97887	1.52076	4.21099
CDKN2AIP	CDKN2AIP	4	0.329	1.60174e-06	6.8057e-10	4.30542e-06	0	0	0	0	0	0	1	0	0	0	0	0	0	0	0	0	0	0	0	0	0	0	0	0	0	1	0	0	8	9	1	0	0	0	0	0	0	0	1	0	6.43308	1	1
KLC2	KLC2	11	0.315	2.86341e-06	6.8057e-10	1.12929e-05	1	0	0	0	1	1	0	0	0	0	0	0	0	0	0	0	0	0	0	0	0	0	0	0	3	1	0	0	47	39	1	0	0	0	8	15	0	0	0	0	8.97073	1	1.4063
COL4A3BP	CERT1	5	0.364	3.83692e-06	3.96874e-06	8.54166e-06	0	0	1	0	2	0	0	0	2	0	0	0	0	0	0	0	0	0	0	0	0	0	0	0	2	1	27	46	24	19	0	0	1	2	3	8	0	0	0	0	1	2.96961	4.23133
RALB	RALB	2	1.018	7.44973e-07	1.8961e-06	2.45733e-06	0	0	0	0	0	0	0	0	1	0	0	0	0	0	0	0	0	0	0	0	0	0	0	0	0	1	5	5	7	7	0	2	1	0	0	3	0	0	0	0	1	12.554	1
XKR6	XKR6	8	0.186	2.75889e-06	7.82581e-06	9.3979e-06	1	0	0	0	0	0	0	0	0	0	0	1	0	0	0	0	0	0	0	0	0	0	0	0	2	0	24	19	30	44	1	0	3	9	1	0	0	0	0	0	12.5362	1	1
TAF5L	TAF5L	1	0.193	2.50748e-06	3.03649e-06	4.43078e-06	0	0	0	0	0	0	0	0	0	0	0	0	0	0	0	0	0	0	0	0	0	0	0	0	0	0	5	2	36	38	1	0	3	1	7	10	0	0	0	0	1.61692	6.26771	1.2333
CLPP	CLPP	19	0.565	7.99695e-07	1.20818e-06	5.2009e-06	0	0	0	0	0	0	0	0	0	0	0	0	0	0	0	0	0	1	0	0	0	0	0	0	3	0	6	1	16	15	1	0	0	0	2	1	0	0	0	0	2.29951	3.05934	1.77143
SHE	SHE	1	0.283	2.28286e-06	6.8057e-10	7.01912e-06	0	0	0	0	0	0	1	0	0	0	0	0	0	0	0	0	0	0	0	0	0	0	0	0	7	5	0	0	28	32	1	0	0	0	4	10	0	0	0	0	12.3431	1	1
STAG1	STAG1	3	0.119	7.17788e-06	4.32255e-06	1.31181e-05	1	0	0	0	0	0	0	0	0	0	0	0	0	0	0	0	0	0	0	0	1	0	0	0	1	0	2	4	19	11	0	0	1	0	4	7	0	0	0	0	2.15247	5.12719	1.11732
RNF39	RNF39	6	1.191	1.10701e-06	5.81857e-06	9.07917e-06	0	0	0	0	0	0	0	0	0	0	0	0	0	0	0	0	0	0	0	0	0	0	0	0	8	6	43	34	29	17	0	1	0	0	0	0	0	0	0	0	1	8.93736	1.37494
KIR3DL3	KIR3DL3	19	1.733	4.46789e-07	5.53706e-06	3.55562e-06	1	0	0	0	0	0	0	0	0	0	0	0	0	0	0	0	0	0	0	0	1	0	0	0	0	0	89	90	47	51	0	0	0	0	0	0	0	0	0	0	1	10.3805	1.18209
CPEB4	CPEB4	5	0.301	3.43459e-06	4.71948e-06	4.60533e-06	0	0	0	0	0	0	0	0	1	0	0	0	0	0	0	0	0	0	0	0	0	0	0	0	0	0	9	7	8	10	0	0	4	3	7	10	0	0	0	0	1	11.9222	1.02883
KAT7	KAT7	17	0.128	3.46524e-06	5.76296e-06	5.76322e-06	0	0	0	0	0	0	0	0	0	0	0	0	0	0	0	0	1	0	0	0	0	0	0	0	0	0	4	4	15	19	1	0	4	5	2	6	0	0	0	0	1.54324	7.94651	1
RASA1	RASA1	5	0.129	5.77607e-06	3.39838e-06	1.2299e-05	0	0	0	0	0	0	1	0	0	0	0	1	0	0	0	0	0	0	0	0	0	0	0	0	0	0	4	2	34	32	0	0	3	2	7	12	0	0	0	0	3.67183	2.94361	1.13132
DOPEY2	DOP1B	21	0.628	8.4224e-06	6.8057e-10	1.76072e-09	0	0	0	0	0	0	0	0	0	0	0	0	0	0	0	0	0	0	0	0	0	0	0	0	34	19	0	0	0	0	4	4	0	0	0	0	0	0	0	0	12.2056	1	1
PXN	PXN	12	0.506	2.10581e-06	4.34721e-07	6.55135e-06	0	0	0	0	0	0	0	0	0	0	2	0	0	0	0	0	0	0	0	0	0	0	0	0	3	3	0	0	44	45	0	2	1	0	8	4	0	0	0	0	1	1.86832	6.52098
MAP1A	MAP1A	15	0.192	7.44638e-06	6.8057e-10	5.23087e-07	0	0	0	0	0	0	0	0	0	0	0	0	0	0	0	0	0	0	0	0	0	0	0	0	4	10	0	0	0	0	6	0	0	0	2	1	0	0	0	0	5.1815	1	1.05395
CREBRF	CREBRF	5	0.1	2.50547e-06	3.15762e-06	2.2497e-06	0	0	1	0	0	0	0	0	0	1	0	0	0	0	0	0	0	0	0	0	1	0	0	0	0	1	12	16	10	6	0	0	0	1	1	0	0	0	0	0	1	10.4694	1.15703
HOXC6	HOXC6	12	0.599	8.24402e-07	2.31972e-06	3.14031e-06	0	0	0	0	0	0	0	0	0	0	0	0	0	0	0	0	0	0	0	0	0	0	0	0	2	0	8	4	13	17	0	0	3	1	4	2	0	0	0	0	1.28315	8.9193	1.05622
SLC20A2	SLC20A2	8	0.326	2.57096e-06	5.27164e-07	1.31232e-05	0	0	0	0	0	0	0	0	0	0	0	0	1	0	0	0	0	0	0	0	0	0	0	0	2	0	1	2	64	51	0	0	0	2	0	9	0	0	0	0	8.58717	1	1.40127
HIST3H2A	H2AW	1	1.247	1.57775e-07	2.45437e-06	2.89138e-06	0	0	0	0	0	0	0	0	0	0	0	0	0	0	0	0	0	0	0	0	0	0	0	0	1	0	17	10	7	10	0	0	3	2	0	0	0	0	0	0	1	12.0226	1
MYBPC1	MYBPC1	12	0.46	4.95197e-06	2.57757e-06	1.72493e-06	1	0	0	0	0	0	0	0	0	0	0	0	0	0	0	1	0	0	0	0	0	0	0	0	0	1	5	4	3	5	1	1	1	0	0	0	0	0	0	0	6.48891	1.8527	1
CLIP3	CLIP3	19	0.411	2.22289e-06	5.65218e-06	1.02195e-05	0	0	0	0	0	0	0	0	0	0	0	1	0	0	0	0	0	0	0	0	1	0	0	0	1	0	11	5	47	62	0	0	2	3	5	9	0	0	0	0	1.06907	11.222	1
ZFAND3	ZFAND3	6	0.378	1.2791e-06	2.39182e-06	1.09345e-06	0	0	0	0	0	0	0	0	0	0	0	0	0	0	0	0	0	0	0	0	0	0	0	0	0	0	9	0	2	3	0	0	1	0	0	1	0	0	0	0	1	11.9885	1
GLS	GLS	2	0.323	3.50728e-06	3.78135e-06	4.08895e-06	0	0	0	0	0	0	0	0	0	0	0	0	0	0	0	0	0	0	0	0	0	0	0	0	0	0	4	0	15	14	0	0	3	0	1	2	0	0	0	0	1	11.319	1.05643
UBR4	UBR4	1	0.095	2.16108e-05	1.02511e-05	6.27315e-05	0	0	2	0	2	2	0	0	0	1	0	1	0	0	0	0	0	0	0	0	0	0	2	0	4	5	30	34	266	221	2	1	4	7	28	62	0	0	0	0	1	1.43936	8.29702
ETV6	ETV6	12	0.318	2.71651e-06	2.17577e-06	2.48837e-06	0	0	1	0	0	0	0	0	0	0	0	0	0	0	0	0	0	0	0	0	0	0	0	0	1	2	5	4	17	10	0	0	0	0	4	6	0	0	0	0	1	9.14548	1.3052
B4GALNT1	B4GALNT1	12	0.793	1.89024e-06	2.59938e-06	8.01428e-06	0	0	1	0	0	0	0	0	0	0	0	0	0	0	0	0	0	0	0	0	0	0	0	0	3	3	7	7	18	15	0	1	1	0	3	4	0	0	0	0	1	10.8193	1.09589
PI4K2A	PI4K2A	10	0.399	1.89911e-06	5.65463e-06	9.20776e-06	0	0	0	1	0	0	0	0	1	0	0	0	0	0	0	0	0	0	0	0	0	0	0	0	2	0	19	24	52	46	2	1	4	2	2	1	0	0	0	0	2.51792	3.2749	1.43512
ASIC4	ASIC4	2	0.614	2.2445e-06	6.8057e-10	7.06367e-06	0	0	0	0	0	0	0	0	0	0	0	0	0	0	0	0	0	0	0	0	0	0	0	0	38	28	0	0	48	45	2	2	0	0	6	8	0	0	0	0	8.39265	1	1.40983
UNC5B	UNC5B	10	0.621	3.68031e-06	6.8057e-10	1.76072e-09	1	2	0	0	0	0	0	0	0	0	0	0	0	0	0	0	0	0	2	0	0	0	0	0	15	16	0	0	0	0	1	2	0	0	0	0	0	0	0	0	11.8197	1	1
STK11	STK11	19	0.245	1.37543e-06	3.81184e-06	3.93828e-06	0	0	1	0	0	0	0	0	0	0	0	0	0	0	0	0	0	0	0	0	0	0	0	0	0	0	4	0	7	3	0	0	0	0	1	1	0	0	0	0	1	10.8559	1.08817
ABCA1	ABCA1	9	0.486	1.05803e-05	1.87289e-06	1.51136e-05	0	0	0	0	1	0	0	0	0	0	0	1	0	0	0	0	0	0	0	0	0	0	0	0	7	13	9	10	92	80	2	3	6	4	14	19	0	0	0	0	1	5.30916	2.22053
DHX37	DHX37	12	0.289	5.04711e-06	2.06724e-06	9.51756e-06	0	1	0	0	0	0	1	0	0	0	0	0	0	0	0	0	0	0	0	0	0	0	0	0	0	5	16	14	65	62	0	2	5	3	3	13	0	0	0	0	1	9.30497	1.26631
ATP6V0A1	ATP6V0A1	17	0.268	5.02701e-06	6.6706e-06	1.04347e-05	0	0	0	0	0	0	0	0	0	0	0	0	0	0	0	0	0	0	0	0	0	0	0	0	1	0	24	23	90	83	1	1	4	1	8	13	0	0	0	0	1	6.2296	1.89037
UBE2S	UBE2S	19	0.637	6.71039e-07	2.95137e-06	4.62243e-06	0	0	0	0	0	0	0	0	0	0	0	0	0	0	0	0	0	0	0	0	1	0	0	0	0	0	2	2	1	1	0	0	1	0	0	5	0	0	0	0	1	11.726	1
ZNF131	ZNF131	5	0.162	2.77028e-06	9.47373e-07	4.77791e-06	0	0	0	0	0	0	0	0	1	0	0	0	0	0	0	0	0	0	0	0	0	0	0	0	0	2	0	0	11	7	0	0	0	0	3	4	0	0	0	0	1	10.3592	1.12911
SEC24C	SEC24C	10	0.174	4.51362e-06	6.8057e-10	1.48614e-05	0	0	0	0	0	0	0	0	0	0	1	0	0	0	0	0	0	0	1	0	0	0	0	0	2	2	0	0	123	110	0	0	0	0	8	12	0	0	0	0	4.67556	1	2.49905
TRPV4	TRPV4	12	1.057	3.56842e-06	3.78614e-06	1.24752e-05	0	0	1	0	2	0	0	0	0	0	0	0	0	0	0	0	0	0	0	0	0	0	0	0	17	13	16	14	58	62	2	2	2	4	7	19	0	0	0	0	1.13469	3.60784	2.83971
CTTNBP2NL	CTTNBP2NL	1	0.685	1.9018e-06	1.95534e-06	6.12434e-07	0	0	0	0	0	0	0	0	1	0	0	0	0	0	0	0	0	0	0	0	0	0	0	0	0	0	4	5	10	5	0	0	1	0	1	1	0	0	0	0	1	9.66534	1.19667
SOX9	SOX9	17	0.168	1.44434e-06	4.31831e-06	1.13061e-05	0	0	0	0	0	0	0	0	0	0	0	0	0	0	0	0	0	0	0	0	0	0	1	0	1	0	17	7	35	31	0	0	1	1	4	5	0	0	0	0	1.13424	8.14089	1.25074
ANP32A	ANP32A	15	0.218	1.1165e-06	1.38937e-06	4.76545e-06	0	0	0	0	0	0	0	0	0	0	0	0	0	0	0	0	0	0	1	0	0	0	0	0	1	0	0	0	5	3	0	0	0	0	6	3	0	0	0	0	9.856	1	1.17167
GHSR	GHSR	3	1.012	8.97633e-07	2.41862e-06	3.46755e-06	0	0	0	0	0	0	0	0	0	0	0	0	0	0	0	0	0	0	0	0	0	0	0	0	8	2	7	11	14	4	5	0	4	0	4	0	0	0	0	0	1.76602	4.45933	1.46454
HIRA	HIRA	22	0.136	5.07374e-06	6.72206e-06	1.08589e-05	0	0	0	0	0	0	0	0	0	0	0	0	0	0	0	0	0	0	0	0	1	0	0	0	0	1	9	6	44	34	2	1	3	3	7	14	0	0	0	0	1	8.09742	1.42126
PIWIL2	PIWIL2	8	0.605	4.60675e-06	6.8057e-10	1.76072e-09	0	0	0	0	0	0	0	0	0	0	0	0	0	0	0	0	0	0	0	0	0	0	0	0	8	5	0	0	0	0	6	1	0	0	0	0	0	0	0	0	11.4619	1	1
HERC5	HERC5	4	0.705	3.51683e-06	6.56968e-07	4.81574e-06	0	0	0	0	0	0	0	0	1	0	0	0	0	0	0	0	0	0	0	0	0	0	0	0	2	12	0	0	18	20	0	2	0	0	0	0	0	0	0	0	1	11.3637	1.00819
AGBL2	AGBL2	11	0.893	4.52786e-06	6.8057e-10	1.76072e-09	2	0	0	0	0	0	0	0	0	0	0	0	0	0	0	0	0	0	0	0	0	0	0	0	37	21	0	0	0	0	1	2	0	0	0	0	0	0	0	0	11.4411	1	1
CDC42BPB	CDC42BPB	14	0.12	9.33025e-06	7.46216e-06	2.2726e-05	1	0	0	0	0	0	0	0	0	1	0	0	0	0	0	0	0	0	1	0	0	0	0	0	3	3	7	8	100	114	0	0	4	1	4	18	0	0	0	0	3.94909	2.89036	1
CDS2	CDS2	20	0.862	2.08722e-06	2.32645e-06	3.32697e-06	0	0	0	0	0	0	0	0	1	0	0	0	0	0	0	0	0	0	0	0	0	0	0	0	5	1	5	3	6	14	2	5	1	1	3	7	0	0	0	0	1.11166	10.2635	1
NPHS1	NPHS1	19	0.696	5.61242e-06	1.2677e-06	5.46171e-06	1	0	0	0	0	0	0	0	0	0	0	1	0	0	0	0	0	0	0	0	0	0	0	0	22	14	16	7	18	17	0	6	1	1	4	2	0	0	0	0	1.035	9.41515	1.16696
TRIM8	TRIM8	10	0.26	1.88521e-06	4.39781e-06	1.06172e-05	0	0	0	0	0	0	0	0	1	0	0	0	0	0	0	0	0	0	0	0	0	0	1	0	0	0	19	9	49	42	0	0	0	3	7	5	0	0	0	0	1	6.7717	1.67137
ZNF827	ZNF827	4	0.234	3.90945e-06	3.52019e-07	1.12639e-05	1	0	0	0	0	0	0	0	0	0	0	0	0	0	0	0	0	0	0	0	0	0	0	0	0	0	2	0	39	42	1	0	0	0	4	5	0	0	0	0	6.75851	1.56949	1.06662
IL1RAP	IL1RAP	3	0.444	2.38353e-06	1.01964e-06	4.69375e-06	0	0	0	0	0	0	0	0	0	0	0	0	0	0	0	0	0	0	0	0	0	0	0	0	1	2	17	10	18	19	0	0	1	0	4	3	0	0	0	0	1	10.0925	1.11645
DENND4A	DENND4A	15	0.28	6.83367e-06	8.21652e-07	1.62859e-05	0	0	1	0	1	0	0	0	0	0	0	0	0	0	0	0	0	0	0	0	0	0	0	0	3	5	0	0	37	35	0	1	0	0	4	10	0	0	0	0	1	11.2244	1.00285
OTUD7A	OTUD7A	15	0.333	2.547e-06	6.8057e-10	1.76072e-09	0	0	0	0	0	0	0	0	0	0	0	0	0	0	0	1	0	0	0	0	0	0	0	0	1	0	0	0	0	0	0	0	0	0	0	0	0	0	0	0	6.73741	1	1
MICAL2	MICAL2	11	0.686	4.85599e-06	6.8057e-10	1.07017e-05	0	1	0	0	1	0	0	0	0	0	0	0	0	0	0	0	0	0	0	0	0	0	0	0	24	13	0	0	105	100	1	0	0	0	11	10	0	0	0	0	4.84785	1	2.29768
LSM11	LSM11	5	0.547	1.19526e-06	2.57277e-06	5.25975e-06	0	0	0	0	0	0	0	0	0	0	0	0	0	0	0	0	0	0	0	0	0	0	0	0	1	0	5	2	11	13	1	0	3	1	0	0	0	0	0	0	1.67295	6.64284	1
NOP56	NOP56	20	0.404	3.29958e-06	6.8057e-10	1.03868e-06	1	0	0	0	0	0	0	0	0	0	0	0	0	0	0	1	0	0	0	0	0	0	0	0	4	4	0	0	1	2	1	2	0	0	0	3	0	0	0	0	11.1064	1	1
PPME1	PPME1	11	0.193	2.23478e-06	6.8057e-10	4.63396e-06	1	0	0	0	0	0	0	0	0	0	0	0	0	0	0	0	0	0	0	0	0	0	0	0	3	0	0	0	9	8	0	0	0	0	0	2	0	0	0	0	11.0972	1	1
TMTC2	TMTC2	12	0.477	2.98284e-06	6.8057e-10	1.76072e-09	0	1	0	0	0	0	1	0	0	0	0	0	0	0	0	0	0	0	0	0	0	0	0	0	6	2	0	0	0	0	3	2	0	0	0	0	0	0	0	0	11.0485	1	1
EIF4E	EIF4E	4	0.354	1.78773e-06	1.64791e-06	3.53272e-06	0	0	0	0	0	0	0	0	1	0	0	0	0	0	0	0	0	0	0	0	1	0	0	0	0	0	1	1	1	5	0	0	0	4	3	1	0	0	0	0	1	11.0433	1
MBTD1	MBTD1	17	0.077	3.65251e-06	1.73912e-06	6.56832e-06	0	0	0	0	0	0	0	0	0	0	0	0	0	0	0	0	1	0	0	0	0	0	0	0	2	1	3	1	11	12	0	0	0	1	0	7	0	0	0	0	1	11.0387	1
VAV1	VAV1	19	0.226	5.31863e-06	7.47023e-06	1.16747e-05	0	0	0	0	0	0	0	0	0	0	0	0	0	0	0	0	0	0	0	0	1	0	0	0	1	0	15	13	58	45	0	0	3	3	9	8	0	0	0	0	1	5.77673	1.90863
PDIK1L	PDIK1L	1	0.643	1.24736e-06	3.4e-06	3.08321e-06	1	0	0	0	2	0	0	0	0	0	0	0	0	0	0	0	0	0	0	0	0	0	0	0	0	2	1	5	8	7	0	0	1	2	0	5	0	0	0	0	1.64597	1	6.69728
PLEKHM3	PLEKHM3	2	0.566	3.93173e-06	2.68775e-06	1.65184e-06	0	0	0	0	0	0	0	0	0	0	0	0	0	0	0	0	0	0	0	0	0	0	0	0	8	3	9	11	11	9	4	0	4	5	1	0	0	0	0	0	9.74389	1	1.1271
USP33	USP33	1	0.331	4.76688e-06	1.00046e-06	8.71881e-06	0	0	0	0	0	0	1	0	0	0	0	0	0	0	0	0	0	0	0	0	0	0	0	0	3	3	1	2	37	28	1	1	2	0	8	5	0	0	0	0	2.57337	2.62542	1.62491
DHRS4	DHRS4	14	1.311	1.01339e-06	9.27348e-07	1.08875e-06	0	0	1	0	0	0	0	0	0	0	0	0	0	0	0	0	0	0	0	0	0	0	0	0	2	0	0	0	0	0	1	0	0	0	0	1	0	0	0	0	1	10.9072	1
MEMO1	MEMO1	2	0.242	1.85774e-06	2.39069e-06	3.90165e-06	1	0	0	0	0	0	0	0	0	0	0	0	0	0	0	0	0	0	0	0	0	0	0	0	0	0	0	2	5	0	1	0	0	0	0	3	0	0	0	0	10.5272	1	1.03078
CFLAR	CFLAR	2	0.173	3.26843e-06	1.83604e-06	3.10608e-06	0	0	0	0	0	0	0	0	0	0	0	0	0	0	0	0	0	0	0	0	0	0	0	0	0	1	4	2	12	10	0	0	3	0	4	3	0	0	0	0	1	9.22868	1.17548
ITGAL	ITGAL	16	0.412	4.97358e-06	1.48941e-06	8.82203e-06	0	0	0	0	1	0	0	0	0	0	0	0	0	0	0	0	0	0	0	0	0	0	0	0	4	2	2	0	32	31	0	1	3	1	5	7	0	0	0	0	1	5.8497	1.1622
RAB14	RAB14	9	0.214	1.28489e-06	2.38365e-06	7.0104e-07	0	0	1	0	0	0	0	0	0	0	0	0	0	0	0	0	0	0	0	0	0	0	0	0	0	0	1	1	1	1	0	0	1	0	0	0	0	0	0	0	1	10.8296	1
PCBP2	PCBP2	12	0.228	1.48015e-06	3.22368e-06	5.79849e-06	0	0	0	0	0	0	0	0	0	0	0	0	0	0	0	0	1	0	0	0	0	0	0	0	0	0	2	2	2	4	0	0	0	0	1	2	0	0	0	0	1	10.8288	1
SSH1	SSH1	12	0.523	3.89773e-06	6.8057e-10	2.01212e-06	0	0	0	0	0	0	0	0	0	0	0	0	0	0	0	0	0	0	0	0	0	0	0	0	5	4	0	0	5	3	7	3	0	0	0	1	0	0	0	0	10.5393	1	1.02706
XRCC5	XRCC5	2	0.147	3.84597e-06	1.47122e-06	4.57852e-06	0	0	0	0	1	0	0	0	0	0	0	0	0	0	0	0	0	0	1	0	0	0	0	0	0	0	5	4	8	8	0	0	1	1	2	5	0	0	0	0	7.02526	1.32567	1.15884
EEF1A1	EEF1A1	6	0.293	1.24791e-06	4.04144e-06	6.87464e-06	0	0	1	0	0	0	0	0	1	0	1	0	0	0	0	0	0	0	0	0	0	0	0	0	0	0	1	0	0	0	0	0	0	1	0	1	0	0	0	0	1	10.7892	1
MAP2K6	MAP2K6	17	0.359	2.62941e-06	3.05132e-06	3.80242e-06	0	0	1	0	0	0	0	0	1	0	0	0	0	0	0	0	0	0	0	0	0	0	0	0	1	0	3	6	29	31	0	0	0	1	0	3	0	0	0	0	1.04592	8.20044	1.03706
SSU72	SSU72	1	0.508	8.04469e-07	1.86675e-06	3.48784e-06	0	0	0	0	0	0	0	0	0	0	2	0	0	0	0	0	0	0	0	0	0	0	0	0	0	1	4	1	2	6	0	0	0	0	1	1	0	0	0	0	1	1.82348	5.86742
KATNAL2	KATNAL2	18	0.816	2.37264e-06	6.8057e-10	1.76072e-09	2	0	0	0	0	0	0	0	0	0	0	0	0	0	0	0	0	0	0	0	0	0	0	0	8	8	0	0	0	0	2	1	0	0	0	0	0	0	0	0	10.6924	1	1
FAR1	FAR1	11	0.299	2.22306e-06	2.18546e-06	6.61375e-06	0	0	0	0	0	0	0	0	0	0	0	0	0	0	0	0	0	0	0	0	1	0	0	0	1	1	1	0	17	18	0	0	0	0	0	2	0	0	0	0	1	10.6902	1
KBTBD11	KBTBD11	8	1.005	6.49984e-07	1.31661e-05	1.99022e-05	0	0	0	0	0	0	0	0	0	0	0	0	0	0	0	0	0	0	0	0	0	0	0	0	1	1	57	48	87	78	0	0	0	0	0	0	0	0	0	0	1.00157	6.59952	1.61645
ZNRF1	ZNRF1	16	0.392	5.48713e-07	1.46915e-07	4.04011e-06	0	0	0	0	0	0	0	0	0	0	0	0	0	0	0	0	0	1	0	0	0	0	0	0	16	8	0	0	14	6	0	0	0	0	0	0	0	0	0	0	5.33077	1	2.00162
DGKE	DGKE	17	0.708	2.814e-06	6.8057e-10	7.62696e-06	0	0	0	0	0	0	1	0	0	0	0	0	0	0	0	0	0	0	0	0	0	0	0	0	7	10	0	0	58	41	5	1	0	0	5	6	0	0	0	0	5.34121	1	1.99262
EHBP1	EHBP1	2	0.348	6.87654e-06	1.34786e-06	3.07606e-06	1	0	0	0	0	0	0	0	0	0	0	1	0	0	0	0	0	0	0	0	0	0	0	0	5	3	3	2	7	9	3	0	1	2	0	1	0	0	0	0	10.6336	1	1
ING4	ING4	12	0.738	1.16515e-06	5.45401e-07	3.98674e-06	0	0	0	0	0	0	0	0	0	0	0	0	0	0	0	0	0	0	0	0	0	0	0	0	0	0	1	1	4	9	1	0	4	1	2	5	0	0	0	0	1.32991	7.96109	1
TNFAIP2	TNFAIP2	14	0.731	2.23512e-06	4.82853e-06	5.69338e-06	0	0	0	0	0	0	0	0	0	0	1	0	0	1	0	0	0	0	0	0	0	0	0	0	3	3	8	8	8	17	0	1	0	0	0	0	0	0	0	0	1	10.5812	1
POLE3	POLE3	9	1.284	4.1932e-07	6.8057e-10	4.79833e-07	0	0	0	0	0	0	0	0	0	0	2	0	0	0	0	0	0	0	0	0	0	0	0	0	1	2	0	0	1	0	0	1	0	0	0	0	0	0	0	0	1	1	10.5583
TMEM231	TMEM231	16	1.213	1.75875e-06	1.83722e-06	5.09381e-06	0	0	1	0	1	0	0	0	0	0	0	0	0	0	0	0	0	0	0	0	0	0	0	0	3	0	2	1	7	10	0	0	0	0	1	0	0	0	0	0	1	9.78519	1.07829
TPM3	TPM3	1	0.691	1.73731e-06	3.16604e-06	2.37403e-06	0	0	0	0	0	0	0	0	0	0	0	1	0	0	0	0	0	0	0	0	0	0	0	0	2	5	8	2	3	2	0	0	2	0	0	3	0	0	0	0	1	10.5142	1
NFIC	NFIC	19	0.542	1.71671e-06	4.97813e-06	8.8086e-06	0	1	0	0	0	0	0	0	0	0	0	0	0	0	0	0	0	0	0	0	0	0	0	0	1	0	19	18	53	56	0	0	5	2	3	8	0	0	0	0	1.08457	8.61923	1.12342
SLC16A1	SLC16A1	1	0.821	1.95272e-06	6.8057e-10	4.14962e-06	1	0	0	0	2	0	0	0	0	0	0	0	0	0	0	0	0	0	0	0	0	0	0	0	0	1	0	0	8	4	1	1	0	0	8	6	0	0	0	0	1.32318	1	7.92459
RANBP9	RANBP9	6	0.13	3.50695e-06	2.65725e-06	6.54548e-06	1	0	0	0	0	0	0	0	0	0	0	0	0	0	1	0	0	0	0	0	0	0	0	0	0	0	11	11	27	24	0	0	0	0	3	7	0	0	0	0	5.64564	1	1.85538
PUM1	PUM1	1	0.129	5.44408e-06	6.08301e-06	1.42705e-05	0	0	1	0	0	0	0	0	1	0	1	0	0	0	0	0	0	0	0	0	0	0	0	0	0	0	11	12	31	29	1	0	3	3	7	10	0	0	0	0	1.37005	6.91042	1.10601
PGAP3	PGAP3	17	0.833	1.1332e-06	6.8057e-10	3.37382e-06	0	0	0	0	0	0	0	0	0	0	2	0	0	0	0	0	0	0	0	0	0	0	0	0	1	0	0	0	34	24	0	0	0	0	3	5	0	0	0	0	1.04861	1	9.95761
ATP8B1	ATP8B1	18	0.56	6.55545e-06	6.8057e-10	1.75877e-05	0	0	0	0	0	0	0	0	0	0	2	0	0	0	0	0	0	0	1	0	0	0	0	0	9	5	0	0	86	79	2	2	0	0	10	22	0	0	0	0	3.69635	1	2.80107
MYO5A	MYO5A	15	0.295	1.10897e-05	3.85479e-06	2.2118e-05	0	0	1	0	2	0	1	0	0	1	0	0	0	0	0	0	0	0	0	0	0	0	2	0	2	1	4	7	119	116	2	1	2	6	19	29	0	0	0	0	1.41744	1	7.29949
UNC80	UNC80	2	0.307	1.67919e-05	6.8057e-10	5.1878e-05	2	0	0	0	1	0	1	0	0	0	0	4	0	0	0	0	0	0	0	1	0	0	0	0	10	11	0	0	274	251	0	0	0	0	3	5	0	0	0	0	2.52049	1	4.09845
ZNF526	ZNF526	19	0.471	2.00464e-06	6.8057e-10	1.23786e-05	0	0	0	0	0	1	0	0	0	0	0	0	0	0	0	1	0	0	0	0	0	0	0	0	1	3	0	0	76	85	2	0	0	0	10	17	0	0	0	0	6.77133	1	1.20567
SEPT2	SEPTIN2	2	0.496	1.78438e-06	5.88091e-07	5.00997e-06	0	0	0	0	0	0	0	0	0	0	1	0	0	0	0	0	0	0	0	0	0	0	0	0	3	1	5	1	6	12	2	0	0	0	10	5	0	0	0	0	3.24115	2.51466	1.26513
SCAF4	SCAF4	21	0.106	5.95781e-06	2.44242e-06	2.04797e-06	0	0	1	0	0	0	0	0	0	0	0	0	0	0	0	0	0	0	0	0	0	0	0	0	4	2	0	3	8	11	0	1	2	0	0	1	0	0	0	0	1	10.2426	1
ARHGAP33	ARHGAP33	19	0.406	5.19585e-06	6.8057e-10	1.82234e-05	0	0	0	0	0	0	1	0	0	0	0	0	0	0	0	0	0	0	0	0	0	0	0	0	4	1	0	0	124	97	0	0	0	0	5	16	0	0	0	0	3.75229	1	2.7266
TPO	TPO	2	1.107	3.78667e-06	2.42546e-06	3.00362e-06	0	0	0	0	0	0	0	0	0	0	0	0	0	0	0	0	0	0	0	0	0	0	0	0	21	17	16	6	19	25	2	3	0	0	0	0	0	0	0	0	1.03835	9.8525	1
BMP7	BMP7	20	0.57	1.60755e-06	4.9131e-07	1.1097e-05	0	0	0	0	1	0	0	0	1	0	0	0	0	0	0	0	0	0	0	0	0	0	0	0	0	0	1	2	46	52	0	0	0	0	8	12	0	0	0	0	1	9.40179	1.08793
ZFP30	ZFP30	19	0.915	2.29659e-06	6.8057e-10	1.76072e-09	0	0	0	0	0	0	0	0	0	0	0	0	0	0	0	2	0	0	0	0	0	0	0	0	7	3	0	0	0	0	2	3	0	0	0	0	0	0	0	0	10.2097	1	1
SFPQ	SFPQ	1	0.152	3.30343e-06	4.02098e-06	1.16388e-05	1	0	0	0	1	0	0	0	0	0	0	0	0	0	0	0	0	0	0	0	0	0	0	0	0	0	4	4	61	46	0	0	1	1	3	3	0	0	0	0	5.73807	1	1.7769
TRIT1	TRIT1	1	1.144	2.27967e-06	6.8057e-10	2.67351e-06	0	0	0	0	0	0	0	0	0	0	2	0	0	0	0	0	0	0	0	0	0	0	0	0	38	46	0	0	20	17	1	1	0	0	7	5	0	0	0	0	1.00756	1	10.0463
ARID5A	ARID5A	2	0.35	1.4136e-06	2.14338e-06	1.59524e-06	0	0	1	0	0	0	0	0	0	0	0	0	0	0	0	0	0	0	0	0	0	0	0	0	0	1	1	1	12	8	1	0	0	0	0	0	0	0	0	0	1.25411	7.01062	1.15034
TRIM3	TRIM3	11	0.293	2.99725e-06	1.09879e-05	9.26834e-06	0	0	0	0	0	0	0	0	0	0	0	0	0	0	0	0	0	0	0	0	0	0	0	0	0	2	32	15	30	42	0	0	5	8	4	2	0	0	0	0	1	10.1057	1
GPR126	ADGRG6	6	0.468	5.02282e-06	6.8057e-10	1.76072e-09	0	0	0	0	0	0	0	0	0	0	0	0	0	0	0	0	0	0	0	0	0	0	0	0	13	11	0	0	0	0	5	1	0	0	0	0	0	0	0	0	10.1009	1	1
KRT10	KRT10	17	0.622	2.21201e-06	6.8057e-10	6.27528e-06	0	0	0	0	0	0	0	0	0	0	0	0	0	0	0	0	0	0	0	0	0	0	2	0	2	0	0	0	31	24	0	0	0	0	8	17	0	0	0	0	1.20426	1	8.32824
ZNF606	ZNF606	19	0.417	2.22222e-06	6.8057e-10	4.83293e-07	0	0	0	0	0	0	0	0	0	0	0	0	0	0	0	0	0	0	0	0	0	0	0	0	0	1	0	0	0	1	7	3	0	0	0	0	0	0	0	0	10.0219	1	1
ZRANB1	ZRANB1	10	0.246	3.42923e-06	2.32815e-06	6.63426e-06	1	0	0	0	0	0	0	0	0	0	0	0	0	0	1	0	0	0	0	0	0	0	0	0	1	0	3	4	6	10	0	0	2	1	5	8	0	0	0	0	4.78326	1.42099	1.47422
DSCAML1	DSCAML1	11	0.165	7.43784e-06	3.22634e-07	4.60902e-05	1	0	0	0	3	0	1	0	0	0	0	0	0	0	0	0	0	0	0	0	0	0	0	1	4	1	1	0	199	213	0	1	0	0	22	47	0	0	0	0	3.82413	1.24073	2.10085
ATP13A1	ATP13A1	19	0.294	5.17056e-06	6.8057e-10	2.29739e-05	0	0	0	0	0	1	0	0	0	0	1	0	0	0	0	0	0	0	1	0	0	0	0	0	3	3	0	0	83	57	1	0	0	0	11	23	0	0	0	0	4.72011	1	2.11101
G3BP1	G3BP1	5	0.519	2.95755e-06	6.8057e-10	2.81456e-06	0	0	0	0	0	0	1	0	0	0	0	1	0	0	0	0	0	0	1	0	0	0	0	0	1	1	0	0	9	7	1	0	0	0	2	4	0	0	0	0	9.3364	1	1.06635
FGFR3	FGFR3	4	0.604	3.34883e-06	2.86981e-06	5.24666e-06	0	0	0	0	0	0	0	0	0	0	1	0	0	0	0	0	0	0	0	0	0	0	0	0	3	3	7	5	13	10	0	1	3	0	2	6	0	0	0	0	1	8.42893	1.17717
CCNT1	CCNT1	12	0.498	2.34249e-06	1.96646e-06	3.03464e-06	0	0	0	0	0	0	0	0	0	0	0	0	0	0	0	0	0	0	1	0	0	0	1	0	3	1	2	2	22	16	0	0	3	3	1	2	0	0	0	0	4.04354	1.36579	1.79625
MYBL2	MYBL2	20	0.437	3.02421e-06	1.993e-06	4.84753e-06	1	0	0	0	0	0	1	0	0	1	0	0	0	0	0	0	0	0	0	0	0	0	0	0	0	1	5	9	25	14	0	0	0	3	3	8	0	0	0	0	7.33956	1	1.34998
FOXRED2	FOXRED2	22	0.622	2.35471e-06	6.95631e-07	6.66714e-06	0	0	0	0	0	0	0	0	0	0	0	0	0	0	0	0	0	0	0	0	0	0	0	0	6	3	7	1	29	23	1	0	2	3	7	6	0	0	0	0	2.02514	3.41842	1.42735
CPSF6	CPSF6	12	0.163	3.6319e-06	1.67938e-06	1.2942e-05	0	0	0	0	1	0	0	0	1	0	0	0	0	0	0	0	0	0	0	0	0	0	0	0	0	0	5	1	23	13	0	0	1	3	6	11	0	0	0	0	1	8.1354	1.21232
WHAMM	WHAMM	15	1.153	2.45656e-06	3.69593e-06	8.17765e-06	0	0	0	0	0	0	0	0	0	0	0	0	0	0	0	0	0	0	0	0	0	0	0	0	7	5	22	12	18	21	1	1	0	0	0	0	0	0	0	0	1.00566	9.79384	1
TAOK2	TAOK2	16	0.241	4.92852e-06	4.12074e-06	1.89498e-05	0	0	0	0	0	0	0	0	0	0	0	0	0	0	0	0	0	0	1	0	0	0	0	0	3	2	6	1	95	77	0	0	0	2	7	14	0	0	0	0	4.81399	1	2.04017
SEL1L	SEL1L	14	0.303	3.82101e-06	6.8057e-10	9.03875e-06	0	0	0	0	0	0	0	0	0	0	0	0	0	0	0	0	0	0	1	0	0	0	0	0	3	0	0	0	51	47	0	0	0	0	4	8	0	0	0	0	7.37121	1	1.32663
AGRN	AGRN	1	0.435	8.37617e-06	6.8057e-10	1.06251e-05	1	0	0	0	0	0	1	0	0	0	0	0	1	0	0	0	0	0	0	0	0	0	0	0	11	9	0	0	70	65	0	2	0	0	0	1	0	0	0	0	6.76679	1	1.43727
LHX2	LHX2	9	0.224	1.04301e-06	7.56451e-06	7.5813e-06	0	0	1	0	0	0	0	0	0	0	1	0	0	0	0	0	0	0	0	0	0	0	0	0	0	0	28	18	28	19	0	0	4	7	5	3	0	0	0	0	1	6.67616	1.45176
SCNN1G	SCNN1G	16	0.408	2.65621e-06	1.90912e-06	1.73667e-06	0	0	0	0	0	0	0	0	0	0	0	0	0	0	0	0	0	0	0	0	0	0	0	0	2	2	4	1	2	3	1	0	3	1	1	6	0	0	0	0	1.35836	7.12602	1
CITED2	CITED2	6	0.628	3.5634e-07	6.8057e-10	2.85612e-06	1	0	0	0	0	0	0	0	0	0	0	0	0	0	0	1	0	0	0	0	0	0	0	0	0	0	0	0	9	7	1	0	0	0	3	5	0	0	0	0	8.8999	1	1.087
SSBP2	SSBP2	5	0.236	2.17901e-06	1.50139e-06	4.48012e-06	0	0	0	0	0	0	0	0	0	0	0	0	0	0	0	1	0	0	0	0	0	0	0	0	0	0	5	5	18	17	0	0	0	0	0	0	0	0	0	0	8.94789	1	1.07923
ZNF207	ZNF207	17	0.493	2.3326e-06	1.17521e-06	3.97664e-06	0	0	0	0	0	0	0	0	1	0	0	0	0	0	0	0	0	0	0	0	0	0	0	0	1	2	0	0	7	10	0	0	0	0	3	3	0	0	0	0	1	9.65027	1
SUFU	SUFU	10	0.111	2.4445e-06	3.15811e-07	8.91335e-06	1	0	0	0	0	0	0	0	0	0	0	0	0	0	0	0	0	0	0	0	0	0	0	0	1	0	1	0	45	56	0	0	0	0	6	8	0	0	0	0	7.76993	1.24129	1
ATG3	ATG3	3	0.718	1.71218e-06	1.66171e-07	3.33833e-06	0	0	0	0	0	0	2	0	0	0	0	0	0	0	0	0	0	0	0	0	0	0	0	0	3	4	0	0	8	10	0	0	0	0	0	4	0	0	0	0	9.62144	1	1
GMIP	GMIP	19	0.711	4.254e-06	2.69998e-06	1.17686e-05	0	0	0	0	1	0	0	0	0	0	0	0	0	0	0	0	0	0	0	0	0	0	0	0	9	7	6	4	63	57	0	2	5	3	1	9	0	0	0	0	1	7.54903	1.27018
ZNF423	ZNF423	16	0.187	2.98401e-06	1.83237e-06	1.8433e-05	0	0	0	0	1	1	1	0	0	0	0	0	0	0	0	0	0	0	0	0	0	0	1	0	1	0	6	5	83	92	1	0	0	3	16	39	0	0	0	0	9.39958	1	1.01996
CLEC14A	CLEC14A	14	1.251	9.87865e-07	4.43538e-07	8.98896e-06	0	0	0	0	0	0	0	0	0	0	0	0	0	0	0	0	0	0	0	0	1	0	0	0	0	0	4	8	74	65	0	0	0	0	3	4	0	0	0	0	1	5.45794	1.74994
EPOR	EPOR	19	0.652	1.45993e-06	1.90169e-06	6.76445e-06	0	0	0	0	0	0	0	0	1	0	0	0	0	0	0	0	0	0	0	0	0	0	0	0	5	4	12	13	19	14	1	1	0	0	2	5	0	0	0	0	1.3263	6.40198	1.11866
PDE8B	PDE8B	5	0.249	3.29523e-06	4.01054e-06	1.47865e-05	0	0	0	0	0	0	0	0	0	0	0	0	0	0	0	0	0	0	0	0	0	0	0	0	0	0	20	19	51	46	0	1	5	3	11	9	0	0	0	0	1	6.14018	1.54511
SLC5A6	SLC5A6	2	0.53	2.93025e-06	6.8057e-10	7.24276e-06	0	0	0	0	0	0	0	0	0	0	0	0	0	0	0	0	0	0	0	0	0	0	0	0	14	1	0	0	23	15	0	0	0	0	8	14	0	0	0	0	7.2392	1	1.30886
MORC3	MORC3	21	0.223	4.02971e-06	5.34394e-06	3.84328e-06	1	0	0	0	1	0	0	0	0	1	0	1	0	0	0	0	0	0	0	0	0	0	1	0	1	0	6	7	19	19	0	0	3	2	0	1	0	0	0	0	4.33857	1.20886	1.80572
CACNG2	CACNG2	22	0.376	1.30754e-06	4.62167e-06	4.31084e-06	0	0	0	0	0	0	0	0	0	0	0	0	0	0	0	0	0	0	0	0	0	0	0	0	0	0	19	8	6	7	0	0	3	4	7	9	0	0	0	0	1	8.93778	1.0578
PSD3	PSD3	8	0.445	3.89655e-06	6.8057e-10	1.76072e-09	1	0	0	0	0	0	0	0	0	0	0	0	0	0	0	0	0	0	1	0	0	0	0	0	2	1	0	0	0	0	0	0	0	0	0	0	0	0	0	0	9.4359	1	1
EIF5A	EIF5A	17	0.543	7.8653e-07	2.44416e-06	1.14826e-06	0	0	1	0	0	0	0	0	0	0	0	0	0	0	0	0	0	0	0	0	0	0	0	0	0	1	0	0	0	0	0	0	0	0	0	0	0	0	0	0	1	7.40874	1
ERF	ERF	19	0.261	1.69527e-06	2.35614e-07	1.15114e-05	0	0	0	0	0	0	0	0	0	0	0	0	0	0	0	0	0	0	1	0	0	0	0	0	0	1	1	1	37	31	0	0	0	1	4	9	0	0	0	0	5.13619	1	1.19807
TLE2	TLE2	19	0.682	3.09758e-06	2.5491e-07	8.87232e-06	0	0	0	0	0	0	0	1	0	0	0	0	0	0	0	0	0	0	0	0	0	0	0	0	12	5	1	0	34	23	4	2	0	0	3	10	0	0	0	0	5.8063	1.24629	1.29989
MAGI2	MAGI2	7	0.257	5.76619e-06	3.76885e-06	1.41527e-05	0	0	0	0	0	0	0	0	0	0	1	0	0	1	0	0	0	0	0	0	0	0	0	0	1	1	12	13	41	42	0	0	1	1	1	2	0	0	0	0	1	9.27317	1.01262
NDN	NDN	15	0.597	5.72465e-07	3.58855e-07	6.93484e-06	0	0	1	0	0	0	0	0	0	0	0	0	0	0	0	0	0	0	0	0	0	0	0	0	0	1	0	0	28	22	0	0	0	1	1	3	0	0	0	0	1	7.78189	1.20019
GPR137B	GPR137B	1	1.319	1.83396e-06	1.42865e-06	2.93349e-06	0	0	1	0	0	0	0	0	0	0	0	0	0	0	0	0	0	0	0	0	0	0	0	0	16	30	13	14	14	11	1	4	1	1	0	5	0	0	0	0	1	9.02265	1.03276
MKNK2	MKNK2	19	0.791	2.04702e-06	2.74306e-06	3.95971e-06	0	0	0	0	0	1	0	0	0	0	0	0	0	0	0	0	0	0	0	0	0	0	0	0	7	0	12	7	19	4	1	0	0	0	0	0	0	0	0	0	2.11374	2.98852	1.47179
YPEL4	YPEL4	11	0.935	5.65262e-07	1.74965e-06	1.78869e-06	0	0	0	0	0	0	0	0	0	0	0	0	0	0	0	0	0	0	0	0	0	0	0	0	2	1	2	3	1	9	0	0	4	0	0	1	0	0	0	0	1.04191	8.89944	1
MAGEL2	MAGEL2	15	0.312	1.87215e-06	6.8057e-10	1.76072e-09	0	0	0	0	0	0	0	0	0	0	0	0	0	0	0	0	0	0	0	0	0	0	0	0	0	0	0	0	0	0	4	0	0	0	0	0	0	0	0	0	9.25016	1	1
MORC2	MORC2	22	0.205	5.61828e-06	5.3184e-06	1.1183e-05	0	0	0	0	0	0	0	0	0	0	0	0	0	0	0	0	0	0	0	0	0	0	0	0	0	4	17	7	24	16	1	2	1	1	5	4	0	0	0	0	1	7.18167	1.28705
EEF2	EEF2	19	0.172	3.0562e-06	6.8057e-10	1.76072e-09	1	0	0	0	0	0	0	0	0	0	0	0	0	0	0	0	0	0	0	0	0	0	0	0	0	0	0	0	0	0	1	0	0	0	0	0	0	0	0	0	9.20736	1	1
RRN3	RRN3	16	0.648	2.78117e-06	1.41625e-06	2.10147e-07	0	0	1	0	0	0	0	0	0	0	0	0	0	0	0	0	0	0	0	0	0	0	0	0	1	3	4	4	0	0	0	0	0	0	0	0	0	0	0	0	1	9.19193	1
ARHGEF18	ARHGEF18	19	0.455	4.07695e-06	3.06448e-06	1.07508e-05	0	0	0	0	1	0	1	0	0	0	1	2	0	0	0	0	0	0	1	0	0	0	0	0	6	6	4	8	61	68	0	0	0	0	4	4	0	0	0	0	7.96315	1	1.15343
PRSS16	PRSS16	6	0.814	2.53076e-06	1.30949e-06	6.85423e-06	0	0	0	0	0	0	0	0	0	0	0	0	0	0	0	0	0	0	0	0	0	0	0	0	4	3	17	13	31	28	2	1	2	1	0	8	0	0	0	0	1.49037	5.93486	1.03319
ADAMTS10	ADAMTS10	19	0.33	5.23957e-06	5.05432e-06	2.46301e-05	0	0	0	0	0	1	0	0	0	0	0	0	0	0	0	0	0	0	0	0	0	0	0	0	4	2	9	4	115	139	0	0	3	1	10	31	0	0	0	0	1.13539	8.02379	1
ADARB1	ADARB1	21	0.399	1.75507e-06	8.60027e-06	8.62034e-06	0	1	0	0	0	0	0	0	1	0	0	0	1	0	0	0	0	0	0	0	0	0	0	0	0	0	30	39	25	18	0	0	4	4	2	4	0	0	0	0	5.18965	1	1.19328
PKDCC	PKDCC	2	0.99	1.38482e-06	4.63163e-06	3.64175e-06	0	0	0	0	0	0	0	0	1	0	0	0	0	0	0	0	0	0	0	0	0	0	0	0	2	0	18	14	5	6	0	0	0	0	0	0	0	0	0	0	1.04141	8.7275	1
TBC1D16	TBC1D16	17	0.771	2.49391e-06	1.45915e-07	8.9711e-06	0	0	0	0	0	0	0	0	0	0	0	0	0	0	0	0	0	0	0	0	0	0	2	0	7	3	1	0	30	31	0	0	0	0	0	2	0	0	0	0	1.40216	1.25528	5.16168
KIF11	KIF11	10	0.121	4.48749e-06	4.30268e-06	4.54616e-06	0	0	0	0	0	0	0	0	0	0	0	0	0	0	0	0	0	0	1	0	0	0	0	0	2	0	4	6	24	19	0	0	0	2	1	4	0	0	0	0	7.734	1	1.17425
POLR2M	POLR2M	15	0.729	1.269e-06	6.8057e-10	1.76072e-09	0	0	0	0	0	0	0	0	0	0	0	0	0	0	0	2	0	0	0	0	0	0	0	0	0	0	0	0	0	0	0	2	0	0	0	0	0	0	0	0	9.06956	1	1
DVL3	DVL3	3	0.422	2.66761e-06	8.19889e-07	2.07625e-05	1	0	0	0	0	0	0	0	0	0	1	1	0	0	0	0	0	0	0	0	0	0	0	0	2	1	0	2	102	106	1	0	0	0	15	17	0	0	0	0	5.54171	1	1.63626
TRAF3IP2	TRAF3IP2	6	0.979	2.69156e-06	2.31908e-06	9.27196e-07	0	0	0	0	0	0	0	0	0	0	0	0	0	0	0	0	1	0	0	0	0	0	0	0	0	1	18	22	3	1	0	1	3	3	0	1	0	0	0	0	1	8.76361	1.03232
KLF7	KLF7	2	0.245	1.03095e-06	2.8327e-06	1.22506e-06	0	0	0	0	0	0	0	0	0	0	1	0	0	0	0	0	0	0	0	0	0	0	0	0	0	0	1	0	2	2	1	0	5	4	0	0	0	0	0	0	1.73337	3.46409	1.50176
PRDM1	PRDM1	6	0.333	2.25489e-06	6.8057e-10	9.74086e-06	0	0	0	0	0	0	1	0	0	0	0	1	0	0	0	0	0	0	0	0	0	0	0	0	1	1	0	0	67	72	1	0	0	0	6	4	0	0	0	0	6.60564	1	1.3616
LEF1	LEF1	4	0.212	1.58976e-06	3.3338e-06	6.12248e-07	1	0	0	0	1	0	0	0	0	0	0	0	0	0	0	0	0	0	0	0	0	0	0	0	0	1	6	18	4	2	0	0	6	5	0	0	0	0	0	0	5.28635	1	1.69175
YBX3	YBX3	12	0.963	1.72994e-06	5.87152e-07	3.41157e-06	0	0	0	0	0	0	0	0	1	0	0	0	0	0	0	0	0	0	0	0	0	0	0	0	4	3	0	1	3	6	0	2	0	0	0	0	0	0	0	0	1	8.93774	1
DYRK1B	DYRK1B	19	0.323	2.00899e-06	6.8057e-10	1.23954e-05	0	0	0	0	0	0	1	0	0	0	1	0	0	0	0	0	0	0	0	0	0	0	0	0	3	1	0	0	52	48	0	0	0	0	3	3	0	0	0	0	6.80899	1	1.31229
ZDBF2	ZDBF2	2	0.46	3.23895e-06	6.8057e-10	1.76072e-09	0	0	0	0	0	0	1	0	0	0	0	0	0	0	0	0	0	0	0	0	0	0	0	0	1	1	0	0	0	0	4	2	0	0	0	0	0	0	0	0	8.93032	1	1
MRAS	MRAS	3	0.368	5.7357e-07	2.60289e-06	2.69047e-06	0	0	0	0	0	0	0	0	0	0	0	0	0	0	0	0	0	0	0	0	1	0	0	0	0	0	10	5	4	5	0	0	0	2	1	2	0	0	0	0	1	8.9042	1
REV3L	REV3L	6	0.117	1.28156e-05	7.06679e-07	1.53369e-05	0	0	0	0	1	0	0	0	0	0	0	0	0	0	0	0	0	0	0	0	0	0	0	0	5	4	10	4	69	45	2	1	1	1	7	22	0	0	0	0	1	4.77181	1.8559
ATP8A2	ATP8A2	13	0.599	6.19063e-06	6.46633e-07	1.64227e-05	0	0	0	0	0	0	0	0	0	0	1	0	0	0	0	0	0	0	0	0	0	0	0	0	4	3	3	0	62	46	3	1	0	0	14	15	0	0	0	0	2.17885	1.95091	2.07043
CDK19	CDK19	6	0.163	2.38922e-06	5.21233e-06	3.36407e-06	1	0	0	0	0	0	0	0	0	0	0	0	0	0	0	0	0	0	0	0	0	0	0	0	4	0	4	3	11	5	0	1	2	2	0	2	0	0	0	0	7.85643	1	1.1197
RNF20	RNF20	9	0.615	6.66616e-06	1.71767e-06	1.01588e-05	0	0	1	0	0	0	0	0	0	0	0	1	0	0	0	0	0	0	0	0	0	0	0	0	6	3	0	1	54	41	3	2	0	2	6	4	0	0	0	0	2.16924	2.2172	1.82343
PREP	PREP	6	0.434	3.35653e-06	6.8057e-10	8.17534e-06	0	0	0	0	0	0	1	0	0	0	0	0	0	0	0	0	0	0	0	0	0	0	0	0	9	5	0	0	26	27	1	0	0	0	2	10	0	0	0	0	8.76893	1	1
NAMPT	NAMPT	7	0.309	1.90682e-06	3.79249e-06	4.68696e-06	0	0	0	0	2	0	0	0	0	0	0	0	0	0	0	0	0	0	0	0	0	0	0	0	0	0	0	1	6	6	1	0	1	1	1	4	0	0	0	0	1.6227	1	5.40007
SORCS3	SORCS3	10	0.465	5.02031e-06	6.8057e-10	1.08347e-05	1	0	0	0	0	0	0	0	0	0	0	0	0	0	0	0	0	0	0	0	0	0	0	0	5	7	0	0	41	38	3	0	0	0	13	10	0	0	0	0	5.59507	1	1.56546
RRBP1	RRBP1	20	0.676	4.05785e-06	6.8057e-10	1.76072e-09	2	0	0	0	0	0	0	0	0	0	0	0	0	0	0	0	0	0	0	0	0	0	0	0	5	7	0	0	0	0	1	0	0	0	0	0	0	0	0	0	8.7281	1	1
PYGL	PYGL	14	0.965	4.33155e-06	1.79528e-06	1.73356e-06	0	0	1	0	0	0	0	0	0	0	0	0	0	0	0	0	0	0	0	0	0	0	0	0	9	16	2	4	1	6	0	2	1	0	0	1	0	0	0	0	1	8.72745	1
ZNF281	ZNF281	1	0.249	2.13964e-06	6.8057e-10	8.75315e-06	0	0	0	0	1	0	0	0	0	0	0	0	0	0	0	1	0	0	0	0	0	0	0	0	0	0	0	0	34	39	0	0	0	0	4	6	0	0	0	0	8.57754	1	1.01722
ZNF532	ZNF532	18	0.296	3.5309e-06	2.1039e-07	1.67415e-05	0	0	0	0	0	0	0	0	0	0	0	0	0	0	0	1	0	0	0	0	0	0	0	0	0	0	0	0	40	30	0	0	0	0	9	21	0	0	0	0	7.16224	1	1.21734
SLC30A10	SLC30A10	1	0.251	9.60462e-07	4.71593e-06	5.29424e-06	0	0	0	0	0	0	0	0	0	0	0	0	0	0	0	0	0	0	0	0	0	0	0	0	1	0	26	25	20	24	2	1	2	0	0	0	0	0	0	0	2.44177	3.5681	1
AGPS	AGPS	2	0.117	3.35184e-06	3.39304e-06	7.90322e-06	0	0	0	0	0	0	1	0	0	0	0	0	0	0	0	0	0	0	0	0	0	0	0	0	0	0	6	5	33	26	0	0	1	1	4	3	0	0	0	0	5.97517	1.05547	1.3807
MAP2K5	MAP2K5	15	0.509	2.96458e-06	1.67317e-06	2.23103e-06	0	0	1	0	0	0	0	0	0	0	0	0	0	0	0	0	0	0	0	0	0	0	0	0	1	0	1	1	15	15	0	1	0	0	0	0	0	0	0	0	1	8.13583	1.06809
DTX3	DTX3	12	0.413	9.42037e-07	2.41878e-06	3.17822e-06	0	0	0	0	0	0	0	0	1	0	0	0	0	0	0	0	0	0	0	0	0	0	0	0	0	2	0	2	7	9	0	1	1	0	3	4	0	0	0	0	1	6.07295	1
KANSL3	KANSL3	2	0.16	3.40946e-06	2.5111e-06	1.94861e-06	0	0	1	0	0	0	0	0	0	0	0	0	0	0	0	0	0	0	0	0	0	0	0	0	4	3	7	8	3	8	1	0	0	0	0	1	0	0	0	0	1.60297	5.40692	1
LRFN5	LRFN5	14	0.462	1.71604e-06	6.8057e-10	7.87954e-06	0	0	0	0	1	0	0	0	0	0	0	0	0	0	0	0	0	0	0	0	0	0	2	0	1	1	0	0	21	23	1	0	0	0	6	7	0	0	0	0	1.44288	1	6.00615
UNC5D	UNC5D	8	0.33	3.2959e-06	6.8057e-10	1.25773e-05	0	0	0	0	2	0	0	0	0	0	1	0	0	0	0	0	0	0	0	0	0	0	1	0	2	3	0	0	69	57	2	0	0	0	7	13	0	0	0	0	1.87351	1	4.61969
KIF3A	KIF3A	5	0.344	3.21935e-06	9.06148e-07	8.66091e-06	0	0	0	0	0	0	0	0	0	0	0	0	0	0	0	0	0	0	0	0	0	0	0	0	1	0	7	6	10	12	0	1	3	0	4	8	0	0	0	0	1	8.61767	1
NR1D1	NR1D1	17	0.394	2.18872e-06	3.97155e-06	6.66345e-06	0	0	0	0	0	0	0	0	0	0	0	0	0	0	0	0	0	0	0	0	0	0	1	0	0	2	31	27	19	18	0	0	6	6	4	6	0	0	0	0	1	6.45703	1.33312
SMARCC1	SMARCC1	3	0.116	6.09097e-06	3.2079e-06	6.6392e-06	1	0	0	0	1	0	0	0	0	0	0	0	0	0	0	0	0	0	0	0	0	0	0	0	5	0	9	10	29	27	0	0	2	3	4	7	0	0	0	0	6.96966	1	1.23358
SRGAP1	SRGAP1	12	0.267	4.90825e-06	9.45746e-07	2.86094e-06	0	0	0	0	0	0	1	0	0	0	0	0	0	0	0	0	0	0	0	0	0	0	0	0	3	1	2	2	22	12	1	0	1	2	2	1	0	0	0	0	5.99718	1	1.43244
ELAVL2	ELAVL2	9	0.189	1.37452e-06	6.8057e-10	4.04528e-06	1	0	0	0	0	0	0	0	0	0	1	0	0	0	0	0	0	0	0	0	0	0	0	0	0	0	0	0	7	8	0	0	0	0	1	8	0	0	0	0	7.98255	1	1.07608
CORO2B	CORO2B	15	0.528	2.06929e-06	1.17903e-06	9.83142e-06	0	0	0	0	0	0	0	0	0	0	1	0	0	0	0	0	0	0	1	0	0	0	0	0	1	1	1	1	40	40	1	0	1	0	8	9	0	0	0	0	4.03578	1.67535	1.2681
EIF3L	EIF3L	22	0.366	2.43897e-06	7.01722e-07	8.44583e-06	1	0	0	0	0	0	0	0	0	0	0	0	0	0	0	0	0	0	0	0	0	0	0	0	4	3	0	0	5	13	0	0	1	0	3	7	0	0	0	0	4.65425	1.83895	1
ADRM1	ADRM1	20	0.175	1.23486e-06	2.57311e-06	3.02329e-06	0	0	0	0	0	0	1	0	0	0	0	0	0	0	0	0	0	0	0	0	0	0	0	0	0	0	12	11	20	25	0	0	0	1	0	0	0	0	0	0	8.55737	1	1
TBX3	TBX3	12	0.281	1.83329e-06	5.36323e-06	8.09934e-06	0	0	0	0	0	0	0	0	0	0	0	0	0	0	0	0	0	0	1	0	0	0	0	0	1	1	14	15	33	21	0	0	2	4	2	2	0	0	0	0	5.86841	1	1.44951
MEI1	MEI1	22	0.635	5.39417e-06	6.8057e-10	1.76072e-09	0	0	0	0	0	0	0	0	0	0	0	0	0	0	0	0	0	0	0	0	0	0	0	0	18	12	0	0	0	0	6	4	0	0	0	0	0	0	0	0	8.50133	1	1
TPT1	TPT1	13	0.485	8.25842e-07	6.68959e-07	6.5094e-07	0	0	1	0	0	0	0	0	0	0	0	0	0	0	0	0	0	0	0	0	0	0	0	0	1	1	1	0	0	1	0	0	0	1	0	0	0	0	0	0	1	8.49647	1
SCN8A	SCN8A	12	0.13	7.56614e-06	2.42535e-05	1.74574e-05	1	0	1	0	1	0	1	0	0	0	1	0	0	0	0	0	0	0	0	0	0	0	0	0	2	2	21	27	71	59	0	0	8	10	12	12	0	0	0	0	4.3925	1	1.93088
PRDM12	PRDM12	9	0.368	9.23628e-07	4.14757e-06	8.94598e-06	0	0	0	0	0	0	0	0	0	0	0	0	0	0	0	0	0	0	0	0	0	0	0	0	0	1	13	5	19	18	0	0	0	0	1	2	0	0	0	0	1	5.40372	1.00046
PPM1E	PPM1E	17	0.293	1.88974e-06	4.75444e-06	8.89354e-06	0	0	1	0	0	0	0	0	0	0	0	0	0	0	0	0	0	0	0	0	0	0	0	0	2	1	15	7	24	24	0	1	1	3	1	1	0	0	0	0	1	8.24158	1.02679
PDE10A	PDE10A	6	0.213	3.34849e-06	3.56879e-06	1.03999e-05	0	0	1	0	0	0	0	0	0	0	0	0	0	0	0	0	0	0	0	0	0	0	0	0	0	0	12	8	50	54	0	0	1	2	4	8	0	0	0	0	1	7.7721	1.08785
KCNF1	KCNF1	2	0.657	8.45121e-07	8.55857e-06	8.38248e-06	0	0	0	0	0	0	0	0	1	0	0	0	0	0	0	0	0	0	0	0	1	0	0	0	1	1	8	5	26	21	0	0	4	5	6	4	0	0	0	0	1	6.37757	1.32561
FGFR1	FGFR1	8	0.215	3.91833e-06	7.90306e-06	3.87226e-06	0	0	0	0	0	0	0	0	0	0	1	0	0	0	0	0	0	0	0	0	0	0	0	0	2	1	12	13	17	26	1	0	5	1	1	4	0	0	0	0	1.45211	5.59492	1.04052
FERMT2	FERMT2	14	0.13	2.74482e-06	6.8057e-10	7.92155e-06	1	0	0	0	1	0	0	0	0	0	0	0	0	0	0	0	0	0	0	0	0	0	0	0	0	0	0	0	43	34	0	0	0	0	1	9	0	0	0	0	6.6573	1	1.26955
KCNC2	KCNC2	12	0.533	1.75875e-06	3.95983e-06	1.00145e-05	0	0	1	0	0	0	0	0	0	0	0	0	0	0	0	0	0	0	0	0	0	0	0	0	3	5	8	2	18	18	0	0	0	1	4	7	0	0	0	0	1	8.44986	1
GPHN	GPHN	14	0.177	4.01648e-06	2.626e-06	1.145e-05	0	0	0	0	0	0	0	0	0	0	2	0	0	0	0	0	0	0	0	0	0	0	1	0	0	1	6	7	30	32	0	0	3	1	10	17	0	0	0	0	1	2.72863	3.09465
PSMB5	PSMB5	14	0.3	1.09108e-06	5.83494e-08	4.91966e-06	0	0	0	0	0	0	0	0	0	0	0	0	0	0	0	0	0	0	1	0	0	0	0	0	0	0	0	0	19	10	0	0	0	0	2	4	0	0	0	0	6.6207	1	1.27352
NLK	NLK	17	0.113	2.72489e-06	3.84987e-06	6.31403e-06	0	0	0	0	0	0	0	1	0	0	0	0	0	0	0	0	0	0	0	0	0	0	0	0	1	0	7	3	34	32	0	0	3	1	2	8	0	0	0	0	1.03998	7.26757	1.11415
SORCS2	SORCS2	4	0.428	4.4756e-06	3.38401e-06	4.50553e-06	0	0	0	0	0	0	0	0	0	0	0	0	0	0	0	0	0	0	0	0	0	0	0	0	5	4	18	9	16	14	1	1	0	0	0	0	0	0	0	0	1.01837	7.58677	1.08804
SMARCAD1	SMARCAD1	4	0.083	4.87894e-06	4.37909e-06	6.76825e-06	0	0	0	0	0	0	0	1	0	0	0	0	0	0	0	0	0	0	0	0	1	0	0	0	1	1	5	4	46	49	3	0	0	2	1	6	0	0	0	0	3.77475	2.08027	1.06783
AMPD2	AMPD2	1	0.638	3.59036e-06	8.29727e-07	1.87244e-05	1	0	0	0	0	0	0	0	0	0	0	0	0	0	0	0	0	0	1	0	0	0	0	0	7	4	3	2	53	51	2	3	0	0	15	20	0	0	0	0	5.05017	1.23145	1.34665
TFCP2	TFCP2	12	0.676	3.11114e-06	1.71657e-06	5.99497e-06	0	0	0	0	0	0	0	0	0	0	0	0	0	0	0	0	0	0	0	0	1	0	0	0	2	0	2	1	18	11	0	0	0	1	2	11	0	0	0	0	1.14454	6.7843	1.07687
USP46	USP46	4	0.423	1.40924e-06	2.57504e-06	4.90764e-06	0	0	1	0	0	0	0	0	0	0	0	0	0	0	0	0	0	0	0	0	0	0	0	0	1	0	2	3	20	12	0	0	2	2	1	3	0	0	0	0	1.1171	6.08167	1.23033
DCAF5	DCAF5	14	0.078	4.35785e-06	6.3893e-06	4.953e-06	0	0	0	0	1	0	0	0	0	0	0	0	0	0	0	0	0	0	0	0	0	0	0	0	2	0	6	4	40	24	1	0	4	3	2	4	0	0	0	0	1.71103	2.4796	1.96581
GNAQ	GNAQ	9	0.302	2.30078e-06	4.23122e-06	4.6082e-06	0	0	0	0	0	0	0	0	0	0	0	0	0	0	0	0	0	0	0	0	1	0	1	0	0	0	1	0	1	1	0	0	1	1	2	1	0	0	0	0	1	6.32853	1.31699
ZNF865	ZNF865	19	0.163	1.49011e-06	1.71235e-06	7.26482e-06	0	0	0	0	0	0	1	0	0	0	0	0	0	0	0	0	0	0	0	0	0	0	0	0	0	0	0	0	0	0	0	0	0	0	0	0	0	0	0	0	8.3255	1	1
GRN	GRN	17	0.483	2.62389e-06	6.8057e-10	1.73783e-06	0	0	0	0	0	0	0	0	0	0	0	0	0	0	0	0	0	0	0	0	0	0	0	0	2	3	0	0	15	21	5	0	0	0	0	0	0	0	0	0	8.32463	1	1
ATP2B1	ATP2B1	12	0.084	5.11043e-06	1.12336e-05	8.31573e-06	0	0	0	0	0	0	0	0	0	0	0	1	0	1	0	0	0	0	0	0	0	0	0	0	0	0	10	15	51	51	1	0	6	5	4	11	0	0	0	0	1.39985	5.03155	1.18094
CDK5	CDK5	7	0.562	1.58629e-06	3.93406e-06	2.97116e-06	0	0	0	0	0	0	0	0	0	0	0	0	0	0	0	0	0	0	0	0	0	0	0	0	0	0	10	5	7	10	0	0	5	4	1	3	0	0	0	0	1	8.30838	1
CCR7	CCR7	17	0.778	9.81868e-07	8.35921e-07	6.65708e-06	0	0	0	0	0	0	1	0	0	0	0	1	0	0	0	0	0	0	0	0	0	0	0	0	1	0	2	3	27	25	0	0	5	3	5	14	0	0	0	0	1.66828	4.6234	1.07685
ATP2A1	ATP2A1	16	0.833	5.00222e-06	6.8057e-10	2.05969e-05	0	0	0	0	3	1	0	0	0	0	0	0	0	0	0	0	0	0	0	0	0	0	0	0	10	12	0	0	91	92	2	6	0	0	14	32	0	0	0	0	1	1	8.29915
ARHGEF1	ARHGEF1	19	0.342	4.50944e-06	7.1208e-06	1.20328e-05	0	0	0	0	0	0	0	0	0	0	0	0	0	0	0	0	0	0	0	0	0	0	0	0	1	0	17	15	68	55	4	1	2	3	3	7	0	0	0	0	4.96454	1	1.66982
ATXN2L	ATXN2L	16	0.143	5.05079e-06	2.1063e-06	7.87779e-06	1	0	0	0	0	0	0	0	0	0	0	0	0	0	0	0	0	0	0	0	0	0	0	0	1	1	18	15	20	20	2	0	1	3	4	6	0	0	0	0	7.87051	1	1.04951
PFKFB3	PFKFB3	10	0.447	2.09944e-06	6.8057e-10	1.05881e-05	0	0	0	0	0	0	0	0	0	0	0	0	0	0	0	0	0	0	0	0	0	0	2	0	1	4	0	0	23	21	1	1	0	0	7	11	0	0	0	0	1	1	5.12187
SEMA5B	SEMA5B	3	0.604	5.44325e-06	1.71012e-06	1.52337e-05	0	0	0	0	1	1	0	0	0	0	0	0	0	0	0	0	0	1	1	0	0	0	0	0	5	8	2	3	108	102	0	2	2	0	11	9	0	0	0	0	1	2.43333	3.38361
GABRB2	GABRB2	5	0.385	1.9641e-06	4.46422e-06	3.62953e-06	0	0	1	0	1	0	0	0	0	0	0	0	0	0	0	0	0	0	0	0	0	0	0	0	0	0	2	2	15	16	2	0	2	3	0	3	1	0	0	0	2.72521	2.44985	1.2313
PAN2	PAN2	12	0.315	5.71192e-06	6.8057e-10	1.92498e-05	0	0	0	0	0	0	0	0	0	0	0	0	0	0	0	0	0	0	0	0	0	0	1	0	4	2	0	0	92	87	4	1	0	0	10	24	0	0	0	0	5.66541	1	1.45005
HMBOX1	HMBOX1	8	0.233	3.06626e-06	2.62269e-06	2.61891e-06	0	0	0	0	0	0	0	0	0	0	0	0	0	0	0	0	0	0	0	0	0	0	0	0	1	1	6	0	5	3	0	0	3	2	0	3	0	0	0	0	1	8.15707	1
REPIN1	REPIN1	7	0.539	2.49793e-06	8.23341e-07	1.83906e-05	1	0	0	0	1	0	0	0	0	0	0	0	0	0	0	0	0	0	0	0	0	0	0	0	0	0	5	2	70	67	1	0	0	0	0	6	0	0	0	0	3.65104	1.97901	1.12776
JADE1	JADE1	4	0.246	3.35955e-06	1.0439e-06	1.10259e-05	0	0	0	0	0	0	0	0	0	0	2	0	0	0	0	0	0	0	0	0	0	0	0	0	0	0	2	0	45	24	0	0	0	0	4	5	0	0	0	0	1	1.49943	5.42507
CNBP	CNBP	3	0.298	1.01565e-06	1.8928e-06	2.76658e-06	0	0	0	0	0	0	0	0	1	0	0	0	0	0	0	0	0	0	0	0	0	0	0	0	0	1	1	3	6	3	0	0	1	0	1	2	0	0	0	0	1	7.62519	1.06368
PIK3C2B	PIK3C2B	1	0.279	7.76446e-06	6.8057e-10	2.0958e-05	0	0	0	0	0	0	0	0	0	0	0	0	0	0	0	0	0	0	0	0	0	0	0	0	5	1	0	0	106	112	3	0	0	0	16	28	0	0	0	0	5.72689	1	1.41551
REXO1	REXO1	19	0.3	3.20009e-06	6.8057e-10	1.76072e-09	1	0	0	0	0	0	0	0	0	0	0	0	0	0	0	0	0	0	0	0	0	0	0	0	2	0	0	0	0	0	0	0	0	0	0	0	0	0	0	0	5.53787	1	1
CDC5L	CDC5L	6	0.129	5.05415e-06	2.84962e-06	5.28349e-06	0	0	0	0	0	0	1	0	0	0	0	0	0	0	0	0	0	0	0	0	0	0	0	0	1	1	4	5	37	27	1	0	2	1	1	3	0	0	0	0	4.22418	1.34846	1.42167
DYNC1I1	DYNC1I1	7	0.678	3.518e-06	1.02595e-08	1.17855e-05	0	0	0	0	2	0	0	0	0	0	0	0	0	0	0	0	0	0	0	0	0	0	1	0	5	2	0	0	48	28	1	1	0	0	8	10	0	0	0	0	1.41925	1	5.70199
L3MBTL2	L3MBTL2	22	0.716	3.80208e-06	8.46723e-07	6.04424e-06	0	0	0	0	0	0	0	0	1	0	0	0	0	0	0	0	0	0	0	0	0	0	0	0	0	1	0	1	19	20	1	1	0	0	5	12	0	0	0	0	1	8.08302	1
RBBP5	RBBP5	1	0.189	3.26876e-06	4.03664e-06	4.26176e-06	0	0	0	0	1	0	0	0	1	0	1	0	0	0	0	0	0	0	0	0	0	0	0	0	0	1	6	4	8	6	0	0	1	1	1	2	0	0	0	0	1	5.37481	1.50326
XPO4	XPO4	13	0.143	5.94089e-06	1.271e-06	1.0877e-05	0	0	0	0	0	0	0	0	0	0	0	0	0	0	0	0	0	0	0	0	0	0	0	0	3	0	3	3	50	43	2	0	1	0	6	9	0	0	0	0	3.29946	1.69971	1.43885
FBXO38	FBXO38	5	0.265	5.93721e-06	1.68633e-06	1.36501e-05	0	0	0	0	2	0	1	0	0	0	1	0	0	0	0	0	0	0	0	0	0	0	0	0	2	1	1	3	87	99	0	0	1	1	6	10	0	0	0	0	2.83106	1	2.84792
LSAMP	LSAMP	3	0.269	1.57329e-06	6.8057e-10	5.47209e-06	0	0	0	0	1	0	0	0	0	0	0	0	0	0	0	0	0	0	0	0	0	0	2	0	1	0	0	0	12	14	0	1	0	0	4	2	0	0	0	0	1	1	8.05456
MYO1D	MYO1D	17	0.704	5.50723e-06	6.8057e-10	7.08485e-06	0	0	0	0	0	0	0	1	0	0	0	0	0	0	0	0	0	0	0	0	0	0	2	0	7	10	0	0	57	64	2	4	0	0	8	5	0	0	0	0	1	1	8.05355
NBEAL1	NBEAL1	2	0.654	1.36576e-05	6.8057e-10	1.76072e-09	0	0	0	0	0	0	0	0	0	0	0	0	1	0	0	0	0	0	0	0	0	0	0	0	42	31	0	0	0	0	1	1	0	0	0	0	0	0	0	0	8.0221	1	1
AIM1L	CRYBG2	1	0.793	3.40762e-06	3.16043e-06	3.92948e-06	0	0	0	0	0	0	0	0	0	0	0	0	0	0	0	0	0	0	0	0	0	0	0	0	20	16	19	18	23	15	4	0	0	0	3	2	0	0	0	0	4.44166	1.29959	1.38488
CLCNKB	CLCNKB	1	1.239	3.45218e-06	2.04237e-06	2.04087e-06	0	0	0	0	2	0	0	0	0	0	0	0	0	0	0	0	0	0	0	0	0	0	0	0	16	12	1	2	0	1	1	3	1	3	1	0	0	0	0	0	1	1	7.98529
KAT2A	KAT2A	17	0.374	3.95216e-06	9.30637e-06	1.03023e-05	0	0	1	0	0	0	0	0	0	0	0	0	0	0	0	0	0	0	0	0	0	0	0	0	2	2	30	18	44	51	0	0	2	4	6	5	0	0	0	0	1	7.25171	1.10075
USF2	USF2	19	0.249	1.93429e-06	1.80177e-06	7.15191e-06	0	0	0	0	0	0	0	0	1	0	0	0	0	0	0	0	0	0	0	0	0	0	0	0	1	0	2	2	15	19	0	0	0	0	0	0	0	0	0	0	1.09499	7.28915	1
ZBTB26	ZBTB26	9	0.64	1.2386e-06	8.04725e-08	3.89834e-06	0	0	0	0	0	0	0	0	0	0	2	0	0	0	0	0	0	0	0	0	0	0	0	0	0	2	1	0	6	10	1	0	0	0	2	2	0	0	0	0	1.09628	1.26072	5.77475
WDR74	WDR74	11	1.122	1.71888e-06	5.29169e-07	4.37753e-06	1	0	0	0	0	0	0	0	0	0	0	0	0	0	0	0	0	0	0	0	0	0	0	0	5	9	1	1	14	17	1	3	4	1	3	5	0	0	0	0	1	7.9773	1
RPS23	RPS23	5	0.465	4.73891e-07	1.18844e-06	2.11848e-06	0	0	0	0	0	0	0	0	0	0	0	0	0	0	0	0	0	0	0	0	1	0	0	0	0	0	0	0	2	2	0	0	1	2	0	0	0	0	0	0	1	7.96588	1
IKBKAP	ELP1	9	0.735	7.08676e-06	6.8057e-10	1.76072e-09	0	0	0	0	0	0	0	0	0	0	0	0	0	0	0	0	0	0	0	0	0	0	0	0	17	12	0	0	0	0	6	1	0	0	0	0	0	0	0	0	7.96002	1	1
DGCR8	DGCR8	22	0.211	3.40444e-06	4.64372e-06	9.44344e-06	0	0	0	0	0	0	0	0	0	0	0	0	0	0	0	0	0	0	1	0	0	0	0	0	2	2	11	9	58	55	0	1	3	3	10	10	0	0	0	0	2.87652	1.71769	1.61028
MAP1S	MAP1S	19	0.436	2.5125e-06	6.8057e-10	9.16274e-06	0	0	0	0	0	0	0	0	0	0	0	0	0	0	0	0	0	0	1	0	0	0	0	0	4	3	0	0	62	43	0	0	0	0	0	1	0	0	0	0	4.21157	1	1.88282
ZFP36L2	ZFP36L2	2	0.285	7.64336e-07	6.8057e-10	7.71442e-06	0	0	0	0	0	0	1	0	0	0	0	0	0	0	0	0	0	0	0	0	0	0	0	0	3	0	0	0	29	35	0	1	0	0	1	3	0	0	0	0	7.9169	1	1
PARP8	PARP8	5	0.391	5.10523e-06	1.5277e-06	4.85687e-06	0	0	1	0	0	0	0	0	0	0	0	0	0	0	0	0	0	0	0	0	0	0	0	0	1	2	0	1	21	19	1	1	0	0	3	3	0	0	0	0	1	6.72734	1.16869
RASIP1	RASIP1	19	0.247	3.04364e-06	7.6365e-06	2.29988e-05	0	0	0	0	0	0	0	0	0	0	0	1	0	0	0	0	0	0	0	0	0	0	0	0	3	3	25	15	67	82	0	0	0	0	4	8	0	0	0	0	1	7.85066	1
PKM	PKM	15	0.383	2.579e-06	2.91065e-07	8.01731e-06	0	0	0	0	0	0	0	0	1	0	0	0	0	0	0	0	0	0	0	0	0	0	0	0	0	0	0	0	15	19	0	1	0	1	4	7	0	0	0	0	1	7.84617	1
KCNC1	KCNC1	11	0.262	1.45181e-06	1.44466e-05	7.12759e-06	1	0	1	0	0	0	0	0	0	0	0	0	0	0	0	0	0	0	0	0	1	0	0	0	0	0	15	18	34	29	0	0	6	6	0	1	0	0	0	0	6.47483	1	1.21037
NKIRAS2	NKIRAS2	17	1.007	1.17109e-06	6.8057e-10	3.37736e-06	0	0	0	0	2	0	0	0	0	0	0	0	0	0	0	0	0	0	0	0	0	0	0	0	2	3	0	0	14	20	1	0	0	0	6	3	0	0	0	0	1.07791	1	7.26028
FMNL3	FMNL3	12	0.359	4.84108e-06	6.8057e-10	2.13299e-05	0	0	0	0	0	0	0	0	0	0	2	0	0	0	0	0	0	0	0	0	0	0	0	0	3	4	0	0	141	124	1	0	0	0	32	23	0	0	0	0	1	1	7.81081
LRP4	LRP4	11	0.416	9.28453e-06	4.19983e-07	3.16722e-05	0	0	0	0	0	0	0	0	0	0	0	0	0	0	0	0	0	0	1	0	0	0	0	0	9	5	1	0	144	138	1	2	2	2	29	50	0	0	0	0	2.05402	1.71464	2.21633
HMGB1	HMGB1	13	0.473	9.11217e-07	2.23126e-06	1.05565e-06	0	0	1	0	0	0	0	0	0	0	0	0	0	0	0	0	0	0	0	1	0	0	0	0	0	0	0	0	0	0	0	0	0	0	0	1	0	0	0	0	1	7.80178	1
RSPRY1	RSPRY1	16	0.189	2.91735e-06	2.76721e-06	6.53944e-06	0	0	0	0	0	0	0	0	0	0	0	0	0	0	0	0	0	0	0	0	0	0	0	0	1	2	9	7	13	22	0	0	5	3	2	4	0	0	0	0	1	7.78294	1
VAMP2	VAMP2	17	0.422	6.48074e-07	1.42234e-06	6.73834e-07	0	0	1	0	0	0	0	0	0	0	0	0	0	0	0	0	0	0	0	0	0	0	0	0	0	0	0	1	3	3	0	0	0	0	3	0	0	0	0	0	1	6.96156	1.1174
KIF23	KIF23	15	0.146	6.83584e-06	1.41311e-06	4.4826e-06	0	0	0	0	0	0	0	0	0	0	0	0	0	0	0	0	0	0	0	0	1	0	0	0	2	1	3	3	16	11	1	1	1	2	1	6	0	0	0	0	1	7.16778	1.08521
XYLT2	XYLT2	17	0.341	2.88804e-06	6.8057e-10	1.65362e-05	0	0	0	0	1	0	0	0	0	0	2	0	0	0	0	0	0	0	0	0	0	0	0	0	1	1	0	0	76	66	2	0	0	0	7	8	0	0	0	0	2.30944	1	3.36645
WHSC1	NSD2	4	0.119	5.79835e-06	1.07551e-05	9.06405e-06	1	0	0	0	0	0	1	0	0	0	0	0	0	0	0	0	0	0	0	0	0	0	0	0	0	2	7	11	33	48	1	0	1	7	5	7	0	0	0	0	7.75945	1	1
NBPF9	NBPF9	1	1.967	1.99844e-06	5.5588e-07	2.35837e-06	0	0	0	0	2	0	0	0	0	0	0	0	0	0	0	0	0	0	0	0	0	0	0	0	0	1	0	0	1	0	0	0	0	0	0	0	0	0	0	0	1	1	7.75803
HLA-E	HLA-E	6	0.614	1.39717e-06	3.05361e-06	5.8848e-06	0	0	1	0	0	0	0	0	0	0	0	0	0	0	0	1	0	0	0	0	0	0	0	0	2	3	0	2	12	11	0	0	0	0	0	0	0	0	0	0	2.26992	3.35133	1.01951
LIPE	LIPE	19	0.851	3.45804e-06	6.8057e-10	1.43284e-05	1	0	0	0	0	0	0	0	0	0	0	0	0	0	0	0	0	0	0	0	0	0	0	0	11	10	0	0	176	146	2	1	0	0	6	15	0	0	0	0	1.7035	1	4.53071
USP43	USP43	17	0.398	4.30073e-06	6.8057e-10	1.08733e-05	1	0	0	0	0	0	0	0	0	0	0	0	0	0	0	0	0	0	0	0	0	0	0	0	5	1	0	0	47	37	1	1	0	0	2	2	0	0	0	0	5.30008	1	1.45115
ARID1A	ARID1A	1	0.071	7.92241e-06	6.8057e-10	1.30669e-05	0	0	0	0	0	0	2	0	0	0	0	0	0	0	0	0	0	0	0	0	0	0	0	0	0	1	0	0	49	36	0	1	0	0	7	17	0	0	0	0	5.32372	1	1.44384
ILDR2	ILDR2	1	0.335	2.18403e-06	3.22092e-06	7.46034e-06	0	0	0	0	0	0	0	0	1	0	0	0	0	0	0	0	0	0	0	0	0	0	0	0	2	2	10	9	21	11	0	0	0	0	0	1	0	0	0	0	1	6.23815	1.23204
SPTBN2	SPTBN2	11	0.357	1.27782e-05	5.00046e-06	4.53647e-05	0	0	0	0	0	1	0	0	0	2	1	0	0	0	0	0	0	0	0	0	0	0	0	0	2	1	11	10	264	251	0	3	2	9	39	50	0	0	0	0	1	1	7.68014
PLA2R1	PLA2R1	2	0.868	6.70117e-06	6.8057e-10	1.76072e-09	0	0	0	0	0	0	0	0	0	0	0	0	0	0	0	0	0	0	0	0	0	0	0	0	53	36	0	0	0	0	6	4	0	0	0	0	0	0	0	0	7.64775	1	1
VPS39	VPS39	15	0.684	4.69703e-06	1.46298e-06	5.11614e-06	0	0	0	0	1	0	0	0	0	0	0	0	0	0	0	0	0	0	1	0	0	0	0	0	8	9	9	8	28	33	4	3	1	0	1	6	0	0	0	0	3.14491	2.24407	1.08141
CRTC3	CRTC3	15	0.359	3.05285e-06	1.70214e-06	1.77076e-06	0	0	0	0	0	0	0	0	0	0	0	0	0	0	0	0	0	0	0	0	1	0	0	0	0	2	1	2	4	9	0	1	0	0	2	1	0	0	0	0	1	7.63116	1
ADAMTS2	ADAMTS2	5	0.311	4.61379e-06	6.8057e-10	2.39935e-05	0	0	0	0	0	0	0	0	0	0	3	0	0	0	0	0	0	0	0	0	0	0	0	0	2	8	0	0	87	86	1	2	0	0	14	16	0	0	0	0	1	1	7.6298
HS3ST4	HS3ST4	16	0.494	9.32104e-07	1.21501e-06	1.19348e-05	1	0	0	0	0	0	0	0	0	0	0	0	0	0	0	0	0	0	0	0	0	0	0	0	0	1	12	8	31	29	0	0	0	0	1	3	0	0	0	0	2.78843	2.64223	1.03509
LRP5	LRP5	11	0.341	5.80354e-06	6.8057e-10	3.15648e-05	1	0	0	0	2	0	0	0	0	0	0	0	0	0	1	0	0	0	0	0	0	0	0	0	4	4	0	0	151	165	1	0	0	0	27	35	0	0	0	0	2.96754	1	2.5647
DUSP8	DUSP8	11	0.498	9.011e-07	6.8004e-06	1.38202e-05	0	0	0	0	0	0	0	0	0	0	0	0	0	0	0	0	0	0	0	0	0	0	0	0	0	0	41	35	52	28	0	0	0	0	0	1	0	0	0	0	1	4.16799	1.81933
RUNDC3A	RUNDC3A	17	0.443	1.47611e-06	5.54716e-06	8.3234e-06	0	0	1	0	0	0	0	0	1	0	0	0	0	0	0	0	0	0	0	0	0	0	0	0	2	1	15	21	17	21	1	0	2	1	3	3	0	0	0	0	1.78332	4.25068	1
INTS2	INTS2	17	0.277	5.5409e-06	6.8057e-10	4.76358e-06	0	0	0	0	0	0	2	0	0	0	0	0	0	0	0	0	0	0	0	0	0	0	0	0	2	4	0	0	12	22	0	1	0	0	0	5	0	0	0	0	7.57233	1	1
CYP27B1	CYP27B1	12	0.983	1.66641e-06	6.8057e-10	1.07727e-05	0	0	0	0	1	0	0	0	0	0	0	0	0	0	0	0	0	0	0	0	0	0	2	0	2	0	0	0	47	34	0	1	0	0	5	5	0	0	0	0	1	1	7.55841
ASCC2	ASCC2	22	0.446	3.29205e-06	6.8057e-10	6.06188e-06	0	0	0	0	0	0	0	0	0	0	0	0	0	0	0	0	0	0	0	0	0	0	0	0	2	1	0	0	32	30	5	2	0	0	3	3	0	0	0	0	6.14145	1	1.22893
ZFP90	ZFP90	16	0.521	2.746e-06	6.8057e-10	1.76072e-09	0	0	0	0	0	0	0	0	0	0	0	0	0	0	0	0	0	0	0	0	0	0	0	0	2	1	0	0	0	0	5	1	0	0	0	0	0	0	0	0	7.54736	1	1
UBE2K	UBE2K	4	0.231	1.03018e-06	2.32171e-06	1.77064e-06	0	0	0	0	0	0	0	0	1	0	0	0	0	0	0	0	0	0	0	0	0	0	0	0	0	0	0	0	7	4	0	0	0	0	0	0	0	0	0	0	1	6.8977	1.08834
RCOR3	RCOR3	1	0.292	1.909e-06	3.92485e-06	6.78014e-06	0	0	0	0	0	0	1	0	0	0	0	0	0	0	0	0	0	0	0	0	0	0	0	0	0	0	4	6	30	27	1	1	0	0	5	7	0	0	0	0	6.06068	1	1.23811
GADD45A	GADD45A	1	1.131	4.8704e-07	2.82315e-06	2.54152e-06	0	0	0	0	0	0	0	0	0	0	0	0	0	0	0	0	0	1	0	0	0	0	0	0	1	0	2	0	10	6	0	0	2	0	0	1	0	0	0	0	1	4.14445	1.80883
KCNT1	KCNT1	9	0.471	4.73104e-06	7.16715e-07	2.07568e-05	1	0	0	0	0	0	1	0	0	0	1	0	0	0	0	0	0	0	0	0	0	0	0	0	5	2	1	0	51	68	1	2	0	0	4	10	0	0	0	0	6.19738	1.20887	1
RBM14	RBM14	11	0.204	1.8348e-06	5.68545e-06	4.93609e-06	0	0	0	0	1	0	0	0	1	0	0	0	0	0	0	0	0	0	0	0	0	0	0	0	0	0	13	9	10	5	1	0	1	2	4	3	0	0	0	0	1.67615	3.19448	1.39917
PPP1R7	PPP1R7	2	0.238	1.68321e-06	1.72517e-06	3.52499e-06	0	0	0	0	0	0	0	0	0	0	0	0	0	0	0	0	0	0	1	0	0	0	0	0	0	0	9	10	19	34	0	0	0	1	1	1	0	0	0	0	7.48256	1	1
PATL1	PATL1	11	0.316	4.88279e-06	6.8057e-10	3.62924e-06	1	0	0	0	0	0	0	0	0	0	0	0	0	0	0	0	0	0	0	0	0	0	1	0	6	5	0	0	18	14	1	0	0	0	1	4	0	0	0	0	4.76209	1	1.57008
RNF146	RNF146	6	0.436	1.6105e-06	6.8057e-10	4.15422e-06	1	0	0	0	0	0	0	0	0	0	0	0	0	0	0	0	0	0	0	0	0	0	0	0	1	0	0	0	9	5	1	0	0	0	4	5	0	0	0	0	6.50292	1	1.14891
IGDCC4	IGDCC4	15	0.55	4.17795e-06	3.60556e-06	1.17904e-05	0	0	0	0	0	0	1	0	0	0	0	0	0	0	0	0	0	0	0	0	0	0	1	0	7	1	3	5	37	29	1	1	0	0	8	4	0	0	0	0	4.76522	1	1.56752
SAMD8	SAMD8	10	0.726	2.18688e-06	2.42463e-06	2.63858e-06	0	0	0	1	0	0	0	0	0	0	0	0	0	0	0	0	0	0	0	0	0	0	0	0	1	1	4	1	6	6	1	1	3	1	2	1	0	0	0	0	1.06445	6.68008	1.05022
SEC14L1	SEC14L1	17	0.377	3.03795e-06	6.8057e-10	1.29756e-05	0	0	0	0	0	0	0	0	0	0	1	0	0	0	0	0	0	1	1	0	0	0	0	0	2	2	0	0	27	29	3	3	0	0	2	11	0	0	0	0	5.81873	1	1.28205
ST7	ST7	7	0.264	3.05905e-06	5.04273e-06	4.67299e-06	0	0	1	0	0	0	0	0	0	0	0	0	0	0	0	0	0	0	0	0	0	0	0	0	0	3	11	12	17	15	1	0	4	3	4	7	0	0	0	0	1	6.67628	1.11616
RC3H1	RC3H1	1	0.287	7.62912e-06	4.51034e-06	7.07869e-06	2	0	0	0	0	0	0	0	0	1	0	0	0	0	0	0	0	0	0	0	0	0	0	0	4	7	19	23	23	31	2	2	2	9	6	7	0	0	0	0	7.44727	1	1
GFRA3	GFRA3	5	0.64	1.76512e-06	2.81877e-06	3.42785e-06	0	0	0	0	0	0	0	1	0	0	0	0	0	0	0	0	0	0	0	0	0	0	0	0	0	0	21	16	27	18	0	0	1	0	0	0	0	0	0	0	1	5.42033	1.37338
SMOC2	SMOC2	6	0.622	1.78957e-06	6.8057e-10	1.76072e-09	0	0	0	0	0	0	0	0	0	0	0	0	0	0	0	0	0	0	0	0	0	0	0	0	6	2	0	0	0	0	5	2	0	0	0	0	0	0	0	0	7.42573	1	1
SPAG11B	SPAG11B	8	1.859	1.53598e-07	1.4796e-06	4.90743e-07	0	0	0	0	0	0	0	0	0	0	0	0	0	0	0	0	0	0	0	0	0	0	0	0	0	0	1	0	4	7	0	1	3	0	0	0	0	0	0	0	1	7.41898	1
GLYR1	GLYR1	16	0.195	2.82104e-06	1.75351e-06	6.16508e-06	1	0	0	0	0	0	0	0	0	0	0	0	0	0	0	0	0	0	0	0	0	0	0	0	1	2	0	0	21	16	0	0	1	0	2	10	1	0	0	0	4.03165	1.72766	1.06441
NOVA2	NOVA2	19	0.242	1.03103e-06	7.9787e-07	3.38504e-06	1	0	0	0	0	0	0	0	0	0	0	0	0	0	0	0	0	0	0	0	0	0	0	0	0	0	0	0	0	0	0	0	0	0	0	0	0	0	0	0	7.41135	1	1
HINFP	HINFP	11	0.514	2.68854e-06	6.8057e-10	6.70094e-06	0	0	0	0	0	0	0	0	0	0	0	0	0	0	0	1	0	0	0	0	0	0	0	0	3	2	0	0	15	16	2	1	0	0	5	1	0	0	0	0	6.55941	1	1.12893
CADM2	CADM2	3	0.38	1.69795e-06	6.8057e-10	4.44489e-06	0	0	0	0	1	0	0	0	0	0	2	0	0	0	0	0	0	0	0	0	0	0	0	0	0	1	0	0	15	11	0	1	0	0	0	3	0	0	0	0	1	1	7.40445
NKTR	NKTR	3	0.308	8.33229e-06	6.8057e-10	4.26202e-06	0	0	0	0	1	0	0	0	0	0	0	0	0	0	0	0	0	0	0	0	0	0	2	0	9	3	0	0	3	9	0	2	0	0	0	2	0	0	0	0	1	1	7.40181
PTPN4	PTPN4	2	0.279	6.05529e-06	6.8057e-10	1.16333e-05	0	0	0	0	0	0	1	0	0	0	0	0	0	0	0	0	0	0	0	0	0	0	0	0	4	0	0	0	44	41	0	0	0	0	9	6	0	0	0	0	5.07534	1	1.45456
RPL11	RPL11	1	0.296	8.42776e-07	2.681e-07	2.5104e-06	0	0	0	0	0	0	0	0	0	0	0	0	0	0	0	0	0	0	1	0	0	0	0	0	0	0	0	0	1	2	0	0	0	0	4	1	0	0	0	0	6.89089	1	1.06897
SETD8	KMT5A	12	0.276	1.66755e-06	2.58561e-06	2.14386e-06	0	0	1	0	0	0	0	0	0	0	0	0	0	0	0	0	0	0	0	0	0	0	0	0	0	0	0	0	2	1	0	0	1	1	1	2	0	0	0	0	1	7.33545	1.00408
DGAT1	DGAT1	8	1.218	2.65588e-06	6.8057e-10	2.94339e-06	0	0	0	0	2	0	0	0	0	0	0	0	0	0	0	0	0	0	0	0	0	0	0	0	9	8	0	0	15	14	0	0	0	0	0	3	0	0	0	0	1	1	7.36252
ARHGEF17	ARHGEF17	11	0.293	7.89829e-06	6.8057e-10	3.1538e-05	0	0	0	0	0	1	1	0	0	0	1	0	0	0	0	0	0	0	0	0	0	0	0	0	3	4	0	0	205	216	2	0	0	0	21	29	0	0	1	0	2.87962	1	2.55243
ABCC9	ABCC9	12	0.482	7.12746e-06	3.26373e-06	1.74388e-05	0	0	0	0	0	0	0	0	0	0	0	0	0	0	0	0	0	0	0	0	0	0	0	0	17	10	14	5	40	26	5	7	4	8	4	9	0	0	0	0	3.05544	1.83083	1.31255
B3GNT9	B3GNT9	16	1.792	5.3332e-07	2.00403e-06	1.03694e-05	0	0	0	0	0	0	0	0	0	0	0	0	0	0	0	0	0	0	0	0	0	0	0	0	0	0	18	10	24	20	0	0	0	0	0	0	0	0	0	0	1	6.64244	1.10484
DNHD1	DNHD1	11	0.807	2.02491e-05	6.8057e-10	1.76072e-09	0	0	0	0	0	0	0	0	0	0	0	0	0	0	0	0	0	0	0	0	0	0	0	0	137	159	0	0	0	0	10	4	0	0	0	0	0	0	0	0	7.33264	1	1
GABRA4	GABRA4	4	0.406	1.99174e-06	4.85516e-06	2.18543e-06	0	0	0	0	0	0	1	0	1	0	0	0	0	0	0	0	0	0	0	0	1	0	0	0	0	1	5	10	2	7	0	0	2	4	1	1	0	0	0	0	2.9649	2.47288	1
WNT7B	WNT7B	22	0.82	1.69426e-06	1.81392e-06	9.13444e-06	1	0	0	0	0	0	0	0	0	0	2	0	0	0	0	0	0	0	0	0	0	0	0	0	1	3	3	5	29	36	0	0	2	0	4	8	0	0	0	0	1.18695	1.94491	3.16504
SLC4A4	SLC4A4	4	0.273	3.88198e-06	2.72869e-06	1.25971e-05	0	0	0	0	1	0	0	0	0	0	0	0	0	0	0	0	0	0	0	0	0	0	0	0	1	2	10	4	57	57	0	2	1	0	9	18	0	0	0	0	1	5.94569	1.22688
MAP4K4	MAP4K4	2	0.175	7.45844e-06	6.1137e-06	8.81619e-06	0	0	0	0	0	0	0	0	0	0	1	0	0	0	0	0	0	0	0	0	0	0	1	0	2	2	9	8	29	31	1	0	4	1	6	3	0	0	0	0	1	5.49812	1.32623
MYH6	MYH6	14	0.856	7.68758e-06	3.74614e-06	2.14027e-05	0	0	0	0	0	0	1	1	0	0	1	0	0	0	0	0	0	0	0	0	1	0	0	0	12	6	2	4	104	113	4	6	0	0	12	25	0	0	0	0	1.56899	3.91151	1.18517
ZNF366	ZNF366	5	0.515	2.1373e-06	1.96739e-06	6.05946e-07	1	0	0	0	1	0	0	0	0	0	0	0	0	0	0	0	0	0	0	0	0	0	0	0	2	0	7	6	0	1	0	0	4	5	0	1	0	0	0	0	3.51993	1.35602	1.52335
SEC61A1	SEC61A1	3	0.295	2.58268e-06	4.8041e-06	5.92673e-06	0	0	1	0	0	0	0	0	0	0	0	0	0	0	0	0	0	0	0	0	1	0	0	0	0	0	2	2	13	8	0	0	0	2	3	3	0	0	0	0	1	6.24761	1.16293
COMTD1	COMTD1	10	1.353	8.32173e-07	6.8057e-10	4.11443e-06	0	0	0	0	0	0	0	0	0	0	2	0	0	0	0	0	0	0	0	0	0	0	0	0	1	4	0	0	21	17	0	0	0	0	1	0	0	0	0	0	1	1	7.25527
HMGXB4	HMGXB4	22	0.424	2.56593e-06	1.20063e-06	2.0113e-06	0	0	0	0	0	0	0	0	0	0	0	0	0	0	0	1	0	0	0	0	0	0	0	0	3	1	3	2	7	10	0	0	0	0	1	3	0	0	0	0	6.02409	1.20166	1
RAB43	RAB43	3	0.708	4.78681e-07	3.58701e-06	3.16216e-06	0	0	1	0	1	0	0	0	0	0	0	0	0	0	0	0	0	0	0	0	0	0	0	0	0	0	0	0	2	2	0	0	0	0	0	0	0	0	0	0	1	5.68606	1.27045
THSD7B	THSD7B	2	0.635	8.54803e-06	6.8057e-10	1.76072e-09	0	0	0	0	0	0	0	0	0	0	0	0	0	0	0	0	0	0	0	0	0	0	0	0	9	3	0	0	0	0	6	3	0	0	0	0	0	0	0	0	7.22231	1	1
SRSF1	SRSF1	17	0.242	1.15143e-06	6.85342e-06	2.20518e-06	0	0	1	0	0	0	0	0	1	0	0	0	0	0	0	0	0	0	0	0	0	0	0	0	0	0	3	1	1	2	0	0	0	0	0	0	0	0	0	0	1	7.21887	1
TLK1	TLK1	2	0.165	4.08265e-06	4.60521e-06	6.48069e-06	0	0	0	0	1	0	0	0	1	0	0	0	0	0	0	0	0	0	0	0	0	0	0	0	0	0	4	4	32	21	0	1	2	1	0	5	0	0	0	0	1	5.21511	1.38091
GLI3	GLI3	7	0.195	4.99133e-06	1.75344e-06	8.90115e-06	0	0	0	0	0	0	0	0	0	0	0	0	0	0	0	0	0	0	0	0	0	0	0	0	0	0	3	1	32	21	0	0	2	0	5	4	0	0	0	0	1	4.80111	1.49855
WDR20	WDR20	14	0.367	2.18889e-06	6.8057e-10	7.87591e-06	0	0	0	0	0	0	1	0	0	0	0	0	0	0	0	0	0	0	0	0	0	0	0	0	1	1	0	0	47	30	0	0	0	0	3	1	0	0	0	0	3.86025	1	1.85695
RTF1	RTF1	15	0.122	3.41332e-06	5.99588e-06	1.20932e-05	0	0	0	0	1	0	0	0	1	0	2	0	0	0	0	0	0	0	0	0	0	0	0	0	2	2	6	3	33	46	1	0	3	4	1	8	0	0	0	0	1.26187	2.99157	1.89883
POU6F1	POU6F1	12	0.42	8.18036e-07	1.79405e-06	3.20505e-06	0	0	1	0	0	0	0	0	0	0	0	0	0	0	0	0	0	0	0	0	0	0	0	0	0	0	4	7	9	16	0	0	1	0	3	4	0	0	0	0	1	7.1627	1
ELOVL1	ELOVL1	1	0.462	1.36342e-06	1.15591e-06	3.96947e-06	0	0	0	0	2	0	0	0	0	0	0	0	0	0	0	0	0	0	0	0	0	0	0	0	0	0	0	1	10	5	0	0	1	1	2	3	0	0	0	0	1	1	7.14858
TRIM71	TRIM71	3	0.172	2.74834e-06	7.80571e-06	1.43922e-05	1	0	0	0	0	0	0	0	0	0	0	1	0	0	0	0	0	0	0	0	0	0	0	0	0	0	17	19	63	69	0	0	0	5	5	5	0	0	0	0	6.22615	1	1.14641
ITCH	ITCH	20	0.218	5.44442e-06	5.82781e-06	4.59872e-06	1	0	0	0	0	0	0	0	1	0	0	0	0	0	0	0	0	0	0	0	0	0	0	0	1	1	8	6	19	20	0	0	3	4	3	5	0	0	0	0	2.59878	2.59802	1.05637
VSNL1	VSNL1	2	0.633	1.30282e-06	2.41607e-06	1.27247e-06	0	0	0	0	0	0	0	0	0	0	1	0	0	0	0	0	0	0	0	0	1	0	0	0	0	0	5	5	4	3	0	0	0	1	0	0	0	0	0	0	1	4.60954	1.54642
SMG7	SMG7	1	0.219	6.14775e-06	1.89122e-06	4.16379e-06	0	0	0	0	0	0	0	0	1	0	0	0	0	0	0	0	0	0	0	0	0	0	0	0	0	1	5	6	24	20	1	0	0	0	2	3	0	0	0	0	1	5.86765	1.2147
C1orf63	RSRP1	1	1.835	1.10801e-06	9.0891e-07	3.83008e-06	0	0	0	0	0	0	0	0	0	0	0	0	0	0	0	0	0	0	0	0	0	0	0	0	11	8	9	4	24	18	0	1	1	0	0	2	0	0	0	0	1	5.89318	1.2071
C11orf68	C11orf68	11	0.843	5.35732e-07	1.61653e-06	6.58589e-06	1	0	0	0	0	0	0	0	0	0	0	0	0	0	0	0	0	0	0	0	0	0	0	0	1	0	3	1	13	9	0	1	2	0	5	10	0	0	0	0	1.33538	4.88422	1.09012
MYO9B	MYO9B	19	0.177	7.80734e-06	2.18843e-06	3.49023e-05	0	0	0	0	2	0	0	0	0	0	0	1	0	0	0	0	0	0	0	0	0	0	0	0	0	1	6	1	207	211	1	0	1	1	14	28	0	0	0	0	1	3.0073	2.36376
GBA	GBA	1	0.801	2.54952e-06	1.40641e-06	5.22255e-06	0	0	0	0	0	0	0	0	0	0	0	1	0	0	0	0	0	0	0	0	0	0	0	0	0	0	0	0	4	2	0	0	3	0	4	2	0	0	0	0	1	6.48217	1.09455
ACVR1B	ACVR1B	12	0.172	2.74867e-06	7.76188e-06	4.97947e-06	0	0	0	0	0	0	0	0	2	0	0	0	0	0	0	0	0	0	0	0	1	0	0	0	1	0	12	13	15	13	0	1	4	9	2	2	0	0	0	0	1	6.44409	1.10052
NFIL3	NFIL3	9	0.437	1.43733e-06	6.8057e-10	5.29595e-06	0	0	0	0	0	0	1	0	0	0	0	0	0	0	0	0	0	0	0	0	0	0	0	0	0	0	0	0	24	18	1	0	0	0	1	5	0	0	0	0	6.05618	1	1.1677
B3GNT6	B3GNT6	11	1.885	7.4829e-07	2.82128e-07	1.03146e-05	0	0	0	0	0	0	0	0	0	0	0	0	0	0	0	0	0	0	0	0	0	0	0	0	0	0	12	5	43	41	0	0	0	0	3	0	0	0	0	0	1	5.50268	1.28357
LBR	LBR	1	0.422	4.17527e-06	6.8057e-10	1.76072e-09	0	0	0	0	0	0	1	0	0	0	0	0	0	0	0	0	0	0	0	0	0	0	0	0	3	0	0	0	0	0	2	1	0	0	0	0	0	0	0	0	7.05997	1	1
PIF1	PIF1	15	1.325	2.35656e-06	4.2227e-06	2.87389e-06	0	0	0	0	0	0	0	1	0	0	0	0	0	0	0	0	0	0	0	0	0	0	0	0	12	19	16	7	5	5	2	4	0	0	0	0	0	0	0	0	1.00311	6.99423	1
SRGAP3	SRGAP3	3	0.243	5.07525e-06	2.1222e-07	2.21512e-05	0	0	0	0	2	0	0	0	0	0	2	1	0	0	0	0	0	0	0	0	0	0	1	0	4	0	0	0	109	99	0	0	0	0	21	40	0	0	0	0	1.71129	1	4.09953
EPHB2	EPHB2	1	0.184	3.38283e-06	2.57359e-07	2.16559e-05	1	0	0	0	0	1	0	0	0	0	1	0	0	0	0	0	0	0	0	0	0	0	0	0	1	1	1	0	72	68	0	0	0	0	12	24	0	0	0	0	4.36799	1.24608	1.28662
UBE2Z	UBE2Z	17	0.358	1.09825e-06	4.00975e-06	7.43168e-06	0	0	0	0	0	0	0	0	0	0	0	1	0	0	0	0	0	0	0	0	0	0	0	0	0	0	3	2	17	15	0	0	4	1	0	0	0	0	0	0	1	6.6211	1.05316
NR2C2	NR2C2	3	0.22	2.17717e-06	3.32353e-06	6.12336e-06	1	0	0	0	0	0	0	0	0	0	0	0	0	0	0	0	0	0	0	0	0	0	0	0	0	0	1	2	21	20	0	0	0	1	3	4	0	0	0	0	6.31265	1	1.10448
AP4E1	AP4E1	15	0.431	4.63657e-06	6.8057e-10	1.76072e-09	0	0	0	0	0	0	0	0	0	0	0	0	0	0	0	0	0	0	1	0	0	0	0	0	9	6	0	0	0	0	1	0	0	0	0	0	0	0	0	0	6.95152	1	1
NRG2	NRG2	5	0.213	2.52506e-06	5.40713e-06	2.10541e-05	0	0	0	0	0	0	0	0	0	0	0	0	0	0	0	0	0	0	0	0	0	0	0	0	6	3	24	24	93	102	0	0	4	2	7	13	0	0	0	0	1.7164	3.63376	1.11346
FANCM	FANCM	14	0.593	7.75977e-06	6.8057e-10	1.76072e-09	0	0	0	0	0	0	0	0	0	0	0	0	0	0	0	0	0	0	0	0	0	0	0	0	10	8	0	0	0	0	6	2	0	0	0	0	0	0	0	0	6.94181	1	1
NPC1	NPC1	18	0.486	5.55648e-06	6.8057e-10	5.10184e-06	0	0	0	0	1	0	0	0	0	0	0	0	0	0	0	0	0	0	0	0	0	0	0	0	14	7	0	0	16	9	3	3	0	0	8	5	0	0	0	0	4.1544	1	1.6689
KHDRBS3	KHDRBS3	8	0.493	1.55934e-06	1.27014e-06	1.19418e-06	0	0	0	0	0	0	0	0	0	0	0	0	0	0	0	0	0	0	0	0	0	0	0	0	1	1	1	3	6	5	1	0	4	1	0	1	0	0	0	0	1.44872	4.64454	1.02565
SYVN1	SYVN1	11	0.171	2.45186e-06	4.59852e-06	3.68915e-06	1	0	0	0	0	0	0	0	0	0	0	0	0	0	0	0	0	0	0	0	0	0	0	0	0	0	11	12	7	12	0	0	3	4	6	3	0	0	0	0	6.62513	1	1.04124
ADCY6	ADCY6	12	0.442	3.96255e-06	3.29589e-06	1.91373e-05	0	0	0	0	0	0	0	0	0	0	0	0	0	0	0	0	0	0	0	0	0	0	2	0	1	8	13	11	101	96	0	0	4	7	23	24	0	0	0	0	1	1	6.86135
CHMP1A	CHMP1A	16	1.177	7.95256e-07	6.8057e-10	2.7938e-06	0	0	0	0	2	0	0	0	0	0	0	0	0	0	0	0	0	0	0	0	0	0	0	0	2	1	0	0	17	24	0	1	0	0	1	1	0	0	0	0	1	1	6.85921
ATP13A3	ATP13A3	3	0.22	5.11109e-06	6.8057e-10	1.02352e-05	0	0	0	0	0	0	0	0	0	0	0	0	0	0	0	0	0	0	1	0	0	0	0	0	1	1	0	0	27	28	2	1	0	0	5	6	0	0	0	0	6.41124	1	1.06956
CBX1	CBX1	17	0.26	1.20076e-06	1.9417e-06	1.7154e-06	0	0	0	0	0	0	1	0	0	0	0	0	0	0	0	0	0	0	0	0	0	0	0	0	0	0	1	2	0	3	0	0	0	0	0	0	0	0	0	0	6.83421	1	1
TERF2	TERF2	16	0.269	1.92206e-06	2.37458e-06	7.5082e-06	1	0	0	0	0	0	0	0	0	0	0	0	0	0	0	0	0	0	0	0	0	0	0	0	0	0	0	5	14	10	0	0	1	0	3	0	0	0	0	0	5.85481	1	1.16587
KDM4B	KDM4B	19	0.171	4.28063e-06	8.00814e-06	1.29312e-05	1	0	1	0	0	0	0	0	1	0	0	2	0	0	0	0	0	0	0	0	0	0	0	0	0	0	7	12	44	29	0	0	1	2	2	5	0	0	0	0	4.65266	1	1.46527
ZNF710	ZNF710	15	0.278	1.9085e-06	4.15624e-07	1.37662e-05	0	0	0	0	0	0	1	0	0	0	0	0	0	0	0	0	0	0	0	0	0	0	0	0	0	0	0	1	42	38	0	0	0	0	5	9	0	0	0	0	5.75483	1	1.1822
IMMT	IMMT	2	0.472	3.68215e-06	6.8057e-10	1.76072e-09	0	0	0	0	0	0	1	0	0	0	0	0	0	0	0	0	0	0	0	0	0	0	0	0	3	1	0	0	0	0	3	2	0	0	0	0	0	0	0	0	6.80182	1	1
ATMIN	ATMIN	16	0.771	1.82776e-06	6.73569e-07	3.17805e-06	0	0	0	0	0	0	0	0	0	0	0	0	0	0	0	0	0	0	0	0	0	0	0	0	2	0	13	5	5	5	0	3	0	0	0	0	0	0	0	0	1	6.79639	1
CHST1	CHST1	11	0.463	1.41494e-06	7.69789e-06	6.85673e-06	0	0	0	0	0	0	0	0	1	0	0	0	0	0	0	0	0	0	0	0	0	0	0	0	4	3	9	7	16	23	1	0	3	2	1	7	0	0	0	0	1.84525	3.67416	1
WDR48	WDR48	3	0.215	4.07008e-06	2.95984e-06	6.64333e-06	0	0	0	0	0	0	0	0	0	0	0	0	0	0	0	0	0	0	0	0	0	0	0	0	0	1	10	2	14	12	0	1	2	2	2	6	0	0	0	0	1	6.7243	1.00418
MAP2K7	MAP2K7	19	0.232	1.6171e-06	3.64649e-06	7.92905e-06	0	0	0	0	1	0	0	0	1	0	0	0	0	0	0	0	0	0	0	0	0	0	0	0	1	0	6	5	27	28	0	0	2	2	2	5	0	0	0	0	1.1186	5.93306	1.01682
CAMTA1	CAMTA1	1	0.172	6.91155e-06	6.8057e-10	3.15378e-05	0	0	0	0	0	0	1	0	0	0	1	0	0	0	0	0	0	0	0	0	0	0	1	0	3	0	0	0	132	119	0	0	0	0	10	24	0	0	0	0	3.72324	1	1.8111
DEPDC5	DEPDC5	22	0.331	1.00418e-05	2.55484e-06	2.31644e-05	0	0	0	0	0	0	0	0	0	0	2	0	0	0	0	0	0	0	0	0	0	0	0	0	5	4	13	10	114	138	4	0	1	2	9	14	0	0	0	0	4.28041	1.25175	1.25821
DNAJC5	DNAJC5	20	0.48	7.22813e-07	8.02933e-07	3.49591e-06	0	0	0	0	0	0	1	0	0	0	0	0	0	0	0	0	0	0	0	0	0	0	1	0	0	0	0	0	12	6	0	0	0	0	5	3	0	0	0	0	3.63862	1	1.85053
DCAF11	DCAF11	14	0.498	3.70175e-06	9.78843e-07	5.21432e-06	0	0	0	0	1	0	1	0	0	0	0	0	0	0	0	0	0	0	0	0	0	0	0	0	8	5	1	3	24	29	2	1	1	3	1	8	0	0	0	0	6.62238	1	1.0165
IPPK	IPPK	9	0.365	2.42372e-06	6.8057e-10	7.20456e-06	0	0	0	0	0	0	0	0	0	0	1	1	0	0	0	0	0	0	1	0	0	0	0	0	1	1	0	0	66	63	0	0	0	0	4	2	0	0	0	0	4.19039	1	1.60636
SIGLEC10	SIGLEC10	19	0.644	3.58333e-06	6.8057e-10	1.94063e-06	0	0	0	0	0	0	0	0	0	0	0	0	0	0	0	0	0	0	0	0	0	0	0	0	2	2	0	0	1	1	6	1	0	0	0	0	0	0	0	0	6.71291	1	1
C6orf106	ILRUN	6	0.419	1.22146e-06	2.98246e-06	2.0484e-06	0	0	0	0	0	1	1	0	0	0	0	0	0	0	0	0	0	0	0	0	0	0	0	0	0	0	1	3	5	9	1	0	4	5	0	0	0	0	0	0	6.70111	1	1
CKAP5	CKAP5	11	0.162	9.55303e-06	7.19129e-07	1.40865e-05	0	0	0	0	0	0	0	0	0	0	0	0	0	0	0	0	0	0	1	0	0	0	0	0	4	1	1	0	45	39	2	1	0	0	4	11	0	0	0	0	4.72254	1.20868	1.17396
RNF213	RNF213	17	0.656	1.96176e-05	6.8057e-10	3.51395e-05	1	0	0	0	0	1	0	0	0	0	0	0	0	0	0	0	0	0	0	0	0	0	0	0	41	32	0	0	228	209	4	19	0	0	30	36	0	0	0	0	1	1	6.68352
ELL	ELL	19	0.301	3.12505e-06	1.27837e-07	9.95037e-06	0	0	0	0	0	0	0	0	0	0	0	0	0	0	1	0	0	0	0	0	0	0	0	0	0	0	1	0	54	36	0	0	1	0	1	3	0	0	0	0	1	2.39124	2.7878
UBE2E3	UBE2E3	2	0.655	7.47754e-07	2.33557e-06	1.52535e-06	0	0	0	0	0	0	0	0	0	0	0	0	0	0	0	0	0	0	0	0	0	0	0	0	0	0	1	0	0	0	0	0	3	0	0	1	0	0	0	0	1	6.66414	1
KAT5	KAT5	11	0.472	2.74516e-06	5.45815e-06	7.4936e-06	0	0	0	0	0	0	0	0	0	0	0	0	0	0	0	0	0	0	0	0	0	0	0	0	1	1	6	2	21	12	1	0	3	2	8	10	0	0	0	0	1.30977	3.65252	1.39285
PLEKHG1	PLEKHG1	6	0.412	4.86085e-06	6.8057e-10	1.76072e-09	0	0	0	0	0	0	0	0	0	0	0	0	0	0	0	0	0	0	0	0	0	0	0	0	3	1	0	0	0	0	5	2	0	0	0	0	0	0	0	0	6.65374	1	1
SOCS7	SOCS7	17	0.233	2.94683e-06	2.58005e-07	1.10398e-05	0	0	0	0	0	0	1	0	0	0	1	0	0	0	0	0	0	0	0	0	0	0	0	0	1	1	0	0	40	25	0	0	0	0	2	5	0	0	0	0	4.51213	1	1.47355
MPHOSPH8	MPHOSPH8	13	0.525	3.20009e-06	6.8057e-10	1.46167e-06	1	0	0	0	0	0	0	0	0	0	0	0	0	0	0	0	0	0	0	0	0	0	0	0	3	0	0	0	5	3	2	1	0	0	2	0	0	0	0	0	5.89976	1	1.12623
NR1H4	NR1H4	12	0.628	2.57381e-06	6.8057e-10	5.07089e-06	0	0	0	0	0	0	0	0	0	0	0	0	0	0	0	0	0	0	0	0	0	0	0	0	2	3	0	0	18	9	5	0	0	0	1	7	0	0	0	0	5.68921	1	1.1679
CAMSAP1	CAMSAP1	9	0.239	5.6079e-06	7.23053e-07	8.33769e-06	0	0	0	0	0	0	0	1	1	0	0	0	0	0	0	0	0	0	0	0	0	0	0	0	3	3	0	0	13	17	0	1	0	1	2	1	0	0	0	0	1	6.63801	1
KRT1	KRT1	12	0.399	2.60831e-06	6.8057e-10	2.87627e-06	0	0	0	0	0	0	0	0	0	0	0	1	0	0	0	0	0	0	0	0	0	0	0	0	2	2	0	0	32	19	3	0	0	0	2	0	0	0	0	0	4.0209	1	1.65026
QSOX2	QSOX2	9	0.838	2.62908e-06	1.61298e-06	4.933e-06	0	0	0	0	0	0	0	0	0	0	0	0	0	0	0	0	0	0	0	0	0	0	0	0	3	4	7	4	16	16	0	3	2	0	1	2	0	0	0	0	1	6.43912	1.02652
MEN1	MEN1	11	0.171	2.4651e-06	8.8693e-06	8.88204e-06	1	0	0	0	0	0	0	0	0	0	0	0	0	0	0	0	0	0	0	0	0	0	0	0	0	0	6	9	15	23	0	0	0	3	0	2	0	0	0	0	6.60711	1	1
GABRG2	GABRG2	5	0.399	2.22691e-06	5.12459e-06	3.95479e-06	0	0	1	0	0	0	1	0	0	0	1	0	0	0	0	0	0	0	0	0	0	0	0	0	1	1	10	5	11	4	0	0	1	5	0	2	0	0	0	0	3.51088	1.35456	1.38889
ZNF236	ZNF236	18	0.169	7.27972e-06	1.29807e-06	3.23603e-05	0	0	0	0	0	0	0	0	0	0	1	0	0	0	0	0	0	0	1	0	0	0	0	0	4	3	3	0	105	107	0	0	0	1	23	24	0	0	0	0	3.58215	1.07772	1.70997
POMZP3	POMZP3	7	1.348	7.34069e-07	1.10737e-06	1.75156e-06	0	0	0	0	0	0	0	0	0	0	0	0	0	0	0	0	0	0	0	0	0	0	0	0	0	0	0	0	0	0	0	1	3	0	0	2	0	0	0	0	1	6.59824	1
IRF2BP2	IRF2BP2	1	0.451	7.58825e-07	6.80429e-06	7.7443e-06	0	0	0	0	0	0	0	1	0	0	0	0	0	0	0	0	0	0	0	0	1	0	0	0	0	0	22	20	25	28	0	0	0	0	0	0	0	0	0	0	1	6.5972	1
ILF3	ILF3	19	0.098	4.37912e-06	6.72156e-06	6.69843e-06	0	0	0	0	0	0	1	0	0	0	0	0	0	0	0	0	0	0	0	0	0	0	0	0	1	0	8	10	19	18	1	0	4	5	2	7	0	0	0	0	6.5965	1	1
MYO1F	MYO1F	19	0.507	6.77186e-06	1.2858e-07	1.99389e-05	0	0	0	0	0	0	0	0	0	0	1	0	0	0	0	0	0	0	1	0	0	0	0	0	8	5	0	0	108	123	1	1	1	0	11	17	0	0	0	0	2.91387	1.90258	1.18957
SEPT7	SEPTIN7	7	0.188	2.01955e-06	2.48399e-06	4.16696e-06	0	0	0	0	0	0	0	0	1	0	0	0	0	0	0	0	0	0	0	0	0	0	0	0	0	0	0	0	1	2	0	0	0	0	0	0	0	0	0	0	1	6.5946	1
TPBG	TPBG	6	1.16	5.63135e-07	3.49218e-07	8.17196e-06	0	0	0	0	2	0	0	0	0	0	0	0	0	0	0	0	0	0	0	0	0	0	0	0	2	4	1	1	58	47	0	0	0	0	3	4	0	0	0	0	1	1	6.59233
FBRS	FBRS	16	0.159	2.43629e-06	9.8518e-06	1.47107e-05	0	0	0	0	0	0	0	0	1	0	1	1	0	0	0	0	0	0	0	0	0	0	2	0	0	0	50	49	60	62	0	0	0	0	0	2	0	0	0	0	1	1.70221	3.86984
NACA	NACA	12	0.698	2.11569e-06	8.8803e-07	3.00483e-06	0	0	1	0	0	0	0	0	0	1	0	0	0	0	0	0	0	0	0	0	0	0	0	0	0	1	0	0	1	2	0	1	0	1	3	2	0	0	0	0	1	6.51391	1.00982
TRPC7	TRPC7	5	0.541	3.62487e-06	2.17245e-06	1.18373e-05	0	0	0	0	0	0	0	0	0	0	0	0	0	0	0	0	0	0	0	0	0	0	0	0	3	7	4	4	33	39	0	0	3	0	11	8	0	0	0	0	1	5.65263	1.16195
ZFP62	ZFP62	5	0.431	2.14953e-06	6.8057e-10	1.76072e-09	0	0	0	0	0	0	0	0	0	0	0	0	0	0	0	0	0	0	0	0	0	0	0	0	17	7	0	0	0	0	0	0	0	0	0	0	0	0	0	0	6.55849	1	1
ZIC2	ZIC2	13	0.267	8.15725e-07	4.74663e-07	2.0138e-06	0	0	0	0	0	0	1	0	0	0	0	0	0	0	0	0	0	0	0	0	0	0	0	0	0	3	0	0	0	0	1	0	0	0	0	0	0	0	0	0	6.55691	1	1
FCGR2B	FCGR2B	1	0.634	7.06733e-07	5.08032e-07	3.14986e-06	0	0	0	0	1	0	0	0	0	0	0	0	0	0	0	0	0	0	0	0	0	0	1	0	0	0	0	0	1	1	3	0	0	1	5	2	0	0	0	0	3.16883	1	2.06298
SMARCE1	SMARCE1	17	0.191	2.32775e-06	1.81558e-06	4.07733e-06	1	0	0	0	0	0	0	0	0	0	0	0	0	0	0	0	0	0	0	0	0	0	0	0	0	0	0	0	5	5	0	0	0	0	0	4	0	0	0	0	6.53162	1	1
UNC119B	UNC119B	12	0.504	9.43477e-07	8.65257e-08	6.03563e-06	0	0	0	0	0	0	0	0	0	0	0	0	0	0	0	0	0	0	0	0	0	0	0	0	1	2	1	0	43	28	3	0	0	0	1	8	0	0	0	0	3.43163	1.26021	1.50895
ITGA2	ITGA2	5	0.594	5.9903e-06	6.8057e-10	1.76072e-09	0	0	0	0	0	0	0	1	0	0	0	0	0	0	0	0	0	0	0	0	0	0	0	0	21	14	0	0	0	0	3	1	0	0	0	0	0	0	0	0	6.52361	1	1
CACTIN	CACTIN	19	0.136	2.81065e-06	5.83929e-06	1.26436e-05	1	0	0	0	0	0	0	0	0	0	1	0	0	0	0	0	0	0	0	0	0	0	0	0	0	0	9	14	18	28	0	0	1	1	2	5	0	0	0	0	6.5058	1	1
MAZ	MAZ	16	0.351	1.13423e-06	4.01291e-06	8.96305e-06	0	0	0	0	0	0	0	0	0	0	1	0	0	0	0	0	0	0	0	0	0	0	0	0	0	0	12	5	23	28	0	0	1	0	0	3	0	0	0	0	1	6.49905	1
BTBD2	BTBD2	19	0.388	1.85774e-06	1.10268e-06	1.70498e-05	0	0	0	0	1	0	1	0	0	0	1	0	0	0	0	0	0	0	0	0	0	0	0	0	0	0	10	9	54	49	0	0	0	0	1	4	0	0	0	0	4.22812	1.32451	1.15723
FOXO3	FOXO3	6	0.267	1.38879e-06	9.69747e-07	4.11425e-06	0	0	0	0	0	0	1	0	0	0	0	0	0	0	0	0	0	0	0	0	0	0	0	0	0	0	0	0	0	0	0	0	0	0	0	0	0	0	0	0	6.47806	1	1
ZNF385A	ZNF385A	12	0.549	1.96578e-06	9.16109e-07	7.92916e-06	0	0	0	0	1	0	0	0	0	0	0	0	0	0	0	0	0	0	1	0	0	0	0	0	0	1	3	1	21	22	0	0	1	0	3	3	0	0	0	0	2.23136	2.78144	1.04259
PRPF3	PRPF3	1	0.068	5.42248e-06	4.57783e-06	8.08847e-06	0	0	0	0	0	0	0	0	0	0	0	0	0	0	1	0	0	0	2	1	0	0	0	0	0	1	8	6	14	18	0	0	1	3	5	2	0	0	0	0	3.94032	1	1.64052
DNMT1	DNMT1	19	0.143	8.47282e-06	1.64467e-05	2.13446e-05	0	0	0	1	0	0	0	0	1	0	2	0	0	0	0	0	0	0	0	0	1	0	0	0	3	2	33	24	66	68	0	0	6	7	8	22	0	0	0	0	1	4.48231	1.43948
NR4A1	NR4A1	12	0.474	1.8683e-06	6.8057e-10	9.6778e-06	0	0	0	0	0	0	0	0	0	0	0	0	0	0	0	0	0	0	0	0	0	0	0	0	2	2	0	0	76	44	2	0	0	0	4	10	0	0	0	0	2.38198	1	2.70837
LIMK1	LIMK1	7	0.225	3.02924e-06	6.8057e-10	1.3648e-05	0	0	0	0	2	0	0	0	0	0	1	0	0	0	0	0	0	0	0	0	0	0	0	0	3	0	0	0	59	62	1	0	0	0	4	12	0	0	0	0	2.46468	1	2.61608
FCHO2	FCHO2	5	0.222	3.19389e-06	6.8057e-10	1.11552e-06	0	0	0	0	0	0	0	0	0	0	0	0	0	0	0	0	0	0	1	0	0	0	0	0	2	2	0	0	7	2	0	0	0	0	1	0	0	0	0	0	5.45608	1	1.1813
SGPP1	SGPP1	14	1.073	1.21583e-06	3.01038e-06	7.54292e-06	0	0	0	0	0	0	0	0	0	0	0	0	0	0	0	0	0	0	0	0	0	0	0	0	1	0	4	1	38	34	0	0	2	0	1	2	0	0	0	0	1.00571	5.198	1.2315
PPIP5K2	PPIP5K2	5	0.82	6.74104e-06	6.77808e-06	7.71309e-06	0	0	1	0	1	0	0	0	0	0	0	0	0	0	0	0	0	0	0	0	0	0	0	0	7	13	7	7	19	14	1	2	5	4	4	5	0	0	0	0	1	5.45382	1.17964
PAX8	PAX8	2	0.2	2.31619e-06	1.85679e-06	2.67834e-06	1	0	0	0	0	0	0	0	0	0	0	0	0	0	0	0	0	0	0	0	0	0	0	0	0	0	7	7	12	12	0	0	2	3	0	3	0	0	0	0	6.42472	1	1
NCOA1	NCOA1	2	0.247	6.2176e-06	2.48508e-06	3.80736e-06	1	0	0	0	1	0	0	0	0	0	0	0	0	0	0	0	0	0	0	0	0	0	0	0	1	1	8	6	6	8	2	0	0	1	2	1	0	0	0	0	5.1922	1	1.23656
CSNK2A2	CSNK2A2	16	0.184	2.66895e-06	3.74291e-06	4.31844e-06	0	0	0	0	0	0	0	0	0	0	0	0	0	0	0	0	0	0	0	0	0	0	0	0	0	1	19	15	14	20	0	0	4	3	2	2	0	0	0	0	1	6.40205	1
WDR33	WDR33	2	0.213	8.9043e-06	1.01837e-06	1.58974e-05	1	0	0	0	0	0	0	0	1	0	0	0	0	0	0	0	0	0	0	0	0	0	0	0	0	1	0	0	44	44	0	3	0	1	5	8	0	0	0	0	1	5.94036	1.07754
TRIM9	TRIM9	14	0.17	2.12273e-06	3.58654e-06	1.23268e-05	0	0	0	0	0	1	0	0	0	0	2	0	0	0	0	0	0	0	0	0	0	0	0	0	0	1	6	8	24	30	1	0	4	2	5	7	0	0	0	0	1.16814	2.30898	2.36693
SLC6A4	SLC6A4	17	0.427	2.90512e-06	6.8057e-10	9.31494e-06	0	0	0	0	0	0	0	0	0	0	0	0	0	0	0	0	0	0	0	0	0	0	0	0	4	0	0	0	24	15	4	3	0	0	8	12	0	0	0	0	4.76811	1	1.33852
GATA2	GATA2	3	0.292	1.33374e-06	3.01404e-06	6.79386e-06	0	0	0	0	0	0	1	0	0	0	0	0	0	0	0	0	0	0	0	0	0	0	0	0	0	0	0	2	29	31	0	0	3	3	3	6	0	0	0	0	6.08234	1	1.04787
EEF1G	EEF1G	11	0.173	2.6604e-06	1.2147e-06	6.19882e-06	0	0	0	0	0	0	1	0	0	0	0	0	0	0	0	0	0	0	0	0	0	0	0	0	0	0	1	0	2	4	0	0	0	2	4	3	0	0	0	0	6.37287	1	1
GRB10	GRB10	7	0.335	3.04984e-06	2.90436e-06	4.39486e-06	0	0	0	0	0	0	0	0	1	0	0	0	0	0	0	0	0	0	0	0	0	0	0	0	2	8	5	2	11	20	0	2	1	2	8	13	0	0	0	0	1	6.35633	1
SF3A2	SF3A2	19	0.399	1.26092e-06	4.20823e-06	2.06593e-06	1	0	0	1	1	0	0	0	0	0	0	0	0	0	0	0	0	0	0	0	0	0	0	0	2	2	3	3	9	5	0	0	0	0	0	4	0	0	0	0	4.26218	1	1.48991
RNF38	RNF38	9	0.145	3.54514e-06	6.8057e-10	4.40799e-06	1	0	0	0	0	0	0	0	0	0	0	0	0	0	0	0	0	0	0	0	0	0	0	0	2	3	0	0	12	10	1	0	0	0	3	1	0	0	0	0	5.5392	1	1.14438
MSH5	MSH5	6	0.699	5.23102e-06	6.8057e-10	8.96394e-06	0	0	0	0	1	0	0	0	0	0	0	1	0	0	0	0	0	0	0	0	0	0	0	0	25	16	0	0	40	32	2	1	0	0	4	5	0	0	0	0	4.50054	1	1.40779
STAT6	STAT6	12	0.296	4.37142e-06	6.8057e-10	1.18599e-05	0	1	0	0	0	0	1	0	0	0	0	0	0	0	0	0	0	0	0	0	0	0	0	0	1	2	0	0	28	38	2	0	0	0	9	9	0	0	0	0	6.31748	1	1
GSE1	GSE1	16	0.128	4.25986e-06	2.48316e-06	1.05351e-05	0	0	0	0	0	0	1	0	0	0	0	0	0	0	0	0	0	0	0	0	0	0	0	0	14	9	0	0	0	0	0	1	0	0	0	0	0	0	0	0	6.31578	1	1
UCK2	UCK2	1	0.487	1.08476e-06	3.33039e-06	3.0995e-06	0	0	0	0	0	0	0	0	0	0	0	0	0	0	0	0	0	0	0	0	0	0	0	0	0	1	9	11	9	4	0	0	5	2	5	0	0	0	0	0	1	4.75265	1.32846
RFTN1	RFTN1	3	0.966	1.42747e-06	6.8057e-10	1.76072e-09	0	0	0	0	0	0	0	0	0	0	0	0	0	0	0	0	0	0	2	0	0	0	0	0	1	2	0	0	0	0	1	2	0	0	0	0	0	0	0	0	6.29601	1	1
PDZD2	PDZD2	5	0.277	9.47966e-06	1.79165e-06	9.29425e-06	1	0	0	0	0	1	1	0	0	0	1	1	0	0	0	0	0	0	0	0	0	0	0	0	7	5	4	5	72	63	2	2	0	2	7	15	0	0	0	0	3.73738	1	1.68206
EIF2AK4	EIF2AK4	15	0.572	8.48287e-06	1.97439e-06	1.27599e-05	0	0	0	0	0	0	0	0	1	0	0	0	0	0	0	0	0	0	0	0	0	0	0	0	15	8	3	6	52	49	2	15	2	2	8	9	0	0	0	0	1	4.49827	1.39016
DRG1	DRG1	22	0.53	1.58254e-06	2.20157e-06	4.40679e-06	0	0	0	0	0	0	0	0	0	0	0	0	0	0	0	1	0	0	0	0	0	0	0	0	1	0	2	4	6	3	1	0	0	0	6	7	0	0	0	0	5.45277	1	1.14346
CTXN1	CTXN1	19	1.675	8.36528e-08	2.32305e-06	1.69399e-06	0	0	0	0	0	0	0	0	1	0	0	0	0	0	0	0	0	0	0	0	0	0	0	0	0	0	4	4	1	2	0	0	0	0	0	0	0	0	0	0	1	6.23019	1
CUL9	CUL9	6	0.28	1.13712e-05	2.28348e-06	2.91625e-05	0	0	0	0	0	0	0	0	0	0	0	0	0	0	0	0	0	0	1	0	0	0	0	0	7	4	19	19	171	136	1	3	1	1	25	36	0	0	0	0	1	1.14777	5.41643
GNB2	GNB2	7	0.265	1.59552e-06	4.92593e-06	5.53759e-06	0	0	0	0	2	0	0	0	1	1	1	1	0	0	0	0	0	0	0	0	0	0	0	0	0	0	5	0	33	31	0	0	1	3	3	6	0	0	0	0	1	1	6.2158
EPHB1	EPHB1	3	0.257	3.36106e-06	6.8057e-10	1.64011e-05	1	0	0	0	2	1	0	0	0	0	0	0	0	0	0	0	0	0	0	0	0	0	0	0	1	3	0	0	55	47	1	1	0	0	9	19	0	0	0	0	2.63344	1	2.35494
PICK1	PICK1	22	0.671	1.43229e-06	2.25642e-06	6.94668e-06	0	0	0	0	0	0	0	0	0	0	0	0	0	0	0	0	0	0	0	0	0	0	0	0	1	0	7	5	24	17	0	0	2	0	1	2	0	0	0	0	1.07498	4.74798	1.21224
SMC6	SMC6	2	0.489	6.29364e-06	1.30004e-06	4.18204e-06	0	0	0	0	0	0	0	0	1	0	0	0	0	0	0	0	0	0	0	0	0	0	0	0	5	7	4	4	10	15	1	5	1	2	1	1	0	0	0	0	1	6.18258	1
MYH2	MYH2	17	0.686	8.83244e-06	1.25661e-06	2.47677e-05	1	0	0	0	1	0	1	0	0	0	0	0	0	0	0	0	0	0	0	0	0	0	2	0	6	7	1	0	114	117	5	7	1	1	20	28	0	0	0	0	1.26667	1.29291	3.77518
GRIN2A	GRIN2A	16	0.188	4.11229e-06	6.22281e-06	1.14826e-05	0	0	0	1	0	0	0	0	0	0	0	0	0	0	0	0	0	0	0	0	0	0	0	0	1	0	10	10	41	27	1	0	4	2	6	7	0	0	0	0	1.39849	2.73541	1.60629
ATP6V0D1	ATP6V0D1	16	0.268	1.57502e-06	4.66337e-06	5.47653e-06	0	0	0	0	0	0	0	0	0	0	0	0	0	0	0	0	0	0	0	0	0	0	0	0	1	0	13	6	9	9	0	0	3	3	4	6	0	0	0	0	1.11978	5.38997	1.01791
CYP46A1	CYP46A1	14	0.297	1.85355e-06	4.33529e-06	7.77343e-06	0	0	0	0	0	0	0	0	1	0	0	0	0	0	0	0	0	0	0	0	0	0	0	0	0	0	6	5	29	16	0	0	1	1	6	5	0	0	0	0	1	3.85077	1.59396
DRD2	DRD2	11	0.439	1.70616e-06	2.37175e-06	7.41047e-06	0	0	0	0	1	0	0	1	1	0	1	0	0	0	1	0	0	0	0	0	0	0	1	0	0	0	1	1	37	25	0	0	0	2	5	6	0	0	0	0	1	1.98597	3.08907
FUBP3	FUBP3	9	0.364	3.0619e-06	6.8057e-10	8.33913e-06	1	0	0	0	0	0	0	0	0	0	0	0	0	0	0	0	0	0	0	0	0	0	0	0	1	1	0	0	38	32	1	0	0	0	4	11	0	0	0	0	4.96192	1	1.23412
TPSAB1	TPSAB1	16	1.95	9.30797e-07	3.63563e-06	2.68895e-06	0	0	0	0	0	0	0	0	0	0	0	0	0	0	0	0	0	0	0	0	0	0	0	0	0	0	7	4	0	0	0	0	3	1	1	0	0	0	0	0	1	5.96714	1.02622
TRIM7	TRIM7	5	0.643	1.45683e-06	3.90123e-06	1.17684e-05	0	1	0	0	0	0	0	0	0	0	0	0	0	0	0	0	0	0	0	0	0	0	0	0	9	1	20	15	39	44	1	3	0	0	1	0	0	0	0	0	1.98994	3.07154	1
CELSR1	CELSR1	22	0.25	9.34114e-06	4.05837e-06	3.70237e-05	0	1	0	1	0	0	0	0	0	0	0	0	0	0	0	0	0	0	0	0	0	0	1	0	4	3	16	17	194	198	1	2	5	3	11	29	0	0	0	0	1	3.70214	1.64895
PTPRS	PTPRS	19	0.254	7.91638e-06	1.08217e-05	4.15835e-05	0	0	0	0	0	0	1	0	1	0	2	0	0	0	0	0	0	0	0	0	0	0	0	0	3	6	28	24	250	225	2	2	5	10	28	41	0	0	0	0	1	1	6.09191
COL9A2	COL9A2	1	0.636	4.44126e-06	6.8057e-10	3.87245e-06	2	0	0	0	0	0	0	0	0	0	0	0	0	0	0	0	0	0	1	0	0	0	0	0	4	10	0	0	36	38	0	1	0	0	0	7	0	0	0	0	5.95369	1	1.02223
SYNJ2	SYNJ2	6	0.691	5.00942e-06	6.8057e-10	2.69359e-07	0	0	0	0	0	0	0	0	0	0	0	0	0	0	0	0	0	0	0	0	0	0	0	0	21	23	0	0	0	0	7	3	0	0	0	0	0	0	0	0	6.08543	1	1
ZC3H7B	ZC3H7B	22	0.323	4.35751e-06	1.88217e-06	1.91178e-05	0	0	0	0	0	0	0	0	0	0	1	0	0	0	0	0	0	0	1	0	0	0	1	0	1	0	0	3	64	83	1	0	1	0	15	16	0	0	0	0	6.073	1	1
CCIN	CCIN	9	0.655	1.10927e-06	6.8057e-10	2.7617e-06	1	0	0	0	0	0	0	0	0	0	0	0	0	0	0	0	0	0	0	0	0	0	0	0	2	0	0	0	47	44	2	1	0	0	2	3	0	0	0	0	4.30625	1	1.40903
SLMAP	SLMAP	3	0.24	4.80373e-06	2.71494e-06	7.13744e-07	0	0	0	0	0	0	1	0	0	0	0	0	0	0	0	0	0	0	0	0	1	0	0	0	2	0	4	12	2	0	0	0	0	0	0	1	0	0	0	0	4.48273	1.31348	1.02938
ZFP14	ZFP14	19	0.735	1.85088e-06	6.8057e-10	6.72454e-06	1	0	0	0	0	0	0	0	0	0	1	0	0	0	0	0	0	0	1	0	0	0	1	0	2	2	0	0	35	24	1	0	0	0	4	13	0	0	0	0	3.55086	1	1.7031
RAD54L2	RAD54L2	3	0.076	5.85798e-06	2.38517e-06	1.31434e-05	0	0	0	0	0	0	0	0	0	0	0	0	0	0	0	0	0	0	0	0	0	0	0	0	0	0	7	3	48	36	0	0	1	0	8	11	0	0	0	0	1	3.81432	1.58341
SMPD4	SMPD4	2	1.022	3.76272e-06	1.24899e-06	9.89041e-06	0	0	0	0	1	0	0	0	0	0	1	0	0	0	0	0	0	0	0	0	0	0	1	0	1	1	0	0	10	14	3	5	5	3	5	13	0	0	0	0	1.03877	5.8115	1
PTGS1	PTGS1	9	0.783	2.58754e-06	6.8057e-10	5.07536e-06	0	0	0	0	0	0	0	0	0	0	2	0	0	0	0	0	0	0	0	0	0	0	0	0	6	7	0	0	49	52	0	1	0	0	5	15	0	0	0	0	1	1	6.0279
HID1	HID1	17	0.471	2.83979e-06	6.8057e-10	1.14589e-05	0	0	0	0	1	0	1	0	0	0	1	0	0	0	0	0	0	0	0	0	0	0	0	0	5	3	0	0	70	67	1	1	0	0	3	4	0	0	0	0	4.17947	1	1.44224
PDZD8	PDZD8	10	0.203	3.28719e-06	1.3185e-06	7.86967e-06	0	0	0	0	0	0	0	0	0	0	0	0	0	0	0	0	0	1	0	0	0	0	0	0	2	0	0	2	29	25	0	0	4	2	0	5	0	0	0	0	1.24962	2.83838	1.69518
USO1	USO1	4	0.369	4.1066e-06	6.8057e-10	1.76072e-09	0	0	0	0	0	0	1	0	0	0	0	0	0	0	0	0	0	0	0	0	0	0	0	0	5	1	0	0	0	0	0	0	0	0	0	0	0	0	0	0	6.01211	1	1
PABPC1L	PABPC1L	20	0.621	2.34651e-06	2.38592e-06	2.13348e-06	0	0	0	0	0	0	0	0	0	0	0	0	0	0	0	0	0	0	1	0	0	0	0	0	3	2	6	2	9	6	0	0	0	0	0	0	0	0	0	0	2.42189	2.26246	1.09699
KLHL7	KLHL7	7	0.643	3.28066e-06	3.78676e-06	5.76157e-06	0	0	0	0	0	0	0	0	0	0	0	0	0	0	0	0	0	0	2	0	0	0	0	0	2	3	6	9	6	6	1	4	2	3	4	6	0	0	0	0	6.00583	1	1
PYGM	PYGM	11	0.874	3.98348e-06	6.8057e-10	1.28386e-06	0	0	0	0	0	0	0	0	0	0	0	0	0	0	0	0	0	0	0	0	0	0	1	0	17	6	0	0	7	8	4	0	0	0	0	1	0	0	0	0	3.8734	1	1.54998
SPI1	SPI1	11	0.244	8.77733e-07	2.58362e-06	4.64327e-06	0	0	0	0	0	0	0	0	0	0	0	0	0	0	0	0	0	0	0	0	0	0	0	0	1	1	13	5	9	19	0	0	0	0	0	1	0	0	0	0	1	5.99136	1
LRRTM2	LRRTM2	5	0.416	1.93228e-06	6.8057e-10	6.86725e-06	1	0	0	0	0	0	0	0	0	0	0	0	0	0	0	0	0	0	0	0	0	0	0	0	0	0	0	0	12	21	1	0	0	0	4	10	0	0	0	0	5.99053	1	1
SRSF7	SRSF7	2	0.299	2.61585e-06	2.98899e-06	9.58043e-07	0	0	0	0	0	0	0	0	1	0	0	0	0	0	0	0	0	0	0	0	0	0	0	0	0	0	1	0	0	1	0	0	0	0	0	1	0	0	0	0	1	5.98858	1
MLLT1	MLLT1	19	0.288	1.55088e-06	4.71391e-06	2.5913e-06	0	0	0	0	0	0	0	0	0	0	2	1	0	0	0	0	0	0	0	0	0	0	0	0	0	0	5	3	6	5	0	0	0	0	0	1	0	0	0	0	1	1.22359	4.89033
SF3B1	SF3B1	2	0.066	7.1015e-06	1.44078e-05	1.17567e-05	0	0	2	0	2	1	0	0	0	0	0	0	0	0	0	0	0	0	1	0	0	0	0	0	0	1	3	3	21	19	0	0	1	3	7	8	0	0	0	0	2.37388	1	2.52009
CRIM1	CRIM1	2	0.238	3.96724e-06	6.8057e-10	3.97642e-06	0	0	0	0	1	0	0	0	0	0	0	0	0	0	0	0	0	0	1	0	0	0	0	0	0	0	0	0	7	13	0	0	0	0	0	2	0	0	0	0	5.76311	1	1.03755
ARHGAP26	ARHGAP26	5	0.276	4.08951e-06	6.8057e-10	9.56779e-06	0	0	0	0	0	0	1	0	0	0	0	0	0	0	0	0	0	0	0	0	0	0	0	0	3	2	0	0	25	33	1	0	0	0	3	11	0	0	0	0	5.97528	1	1
PVRL4	NECTIN4	1	0.389	2.17951e-06	6.8057e-10	8.22165e-06	0	0	0	0	0	0	0	0	0	0	0	0	0	0	0	0	0	0	0	0	0	0	0	0	4	2	0	0	86	58	1	0	0	0	5	10	0	0	0	0	2.11109	1	2.81092
POT1	POT1	7	0.362	2.45488e-06	1.67981e-06	2.67402e-06	0	0	0	0	0	0	0	0	0	0	0	0	0	0	0	0	0	0	0	0	0	0	0	0	2	3	6	1	8	11	3	0	0	1	0	0	0	0	0	0	3.54739	1.6719	1
GADD45B	GADD45B	19	0.904	5.04577e-07	2.03794e-06	2.5316e-06	0	0	1	0	0	0	0	0	0	0	0	0	0	0	0	0	0	0	0	0	0	0	0	0	1	2	2	3	4	6	0	0	0	0	2	0	0	0	0	0	1	5.86745	1.01011
JARID2	JARID2	6	0.188	4.86638e-06	9.75103e-06	9.3038e-06	0	0	1	0	0	0	1	0	0	0	1	0	0	0	0	0	0	0	0	0	1	0	0	0	2	1	29	40	36	43	1	0	1	4	6	3	0	0	0	0	5.40272	1	1.09459
EZH2	EZH2	7	0.146	3.78969e-06	7.87455e-06	8.81064e-06	0	0	0	0	0	0	0	0	0	0	2	0	0	0	0	0	0	0	0	0	0	0	0	0	0	0	7	7	35	32	1	0	2	2	1	6	0	0	0	0	1.51078	1	3.91389
OPN5	OPN5	6	0.395	1.78823e-06	1.90255e-07	4.94628e-06	0	0	0	0	0	0	0	0	0	0	0	0	0	0	0	0	0	0	1	0	0	0	0	0	0	0	0	0	15	13	1	1	0	0	4	3	0	0	0	0	5.08649	1	1.16243
DCLK1	DCLK1	13	0.227	3.9602e-06	4.47433e-06	1.41231e-05	0	0	0	0	1	0	0	0	0	0	0	0	0	0	0	0	0	0	1	0	0	0	0	0	0	0	22	24	17	30	0	0	2	2	9	8	0	0	0	0	5.91099	1	1
SLIT1	SLIT1	10	0.222	6.82227e-06	6.8057e-10	2.97919e-05	0	0	0	0	0	0	0	0	0	0	0	0	0	0	0	0	0	0	0	0	0	0	0	0	4	1	0	0	126	109	1	0	0	0	31	29	0	0	0	0	1.57965	1	3.73521
LUZP1	LUZP1	1	0.402	3.56406e-06	6.8057e-10	1.76072e-09	0	0	0	0	0	0	0	0	0	0	0	0	0	0	0	0	0	0	0	0	0	0	0	0	10	5	0	0	0	0	2	0	0	0	0	0	0	0	0	0	5.87905	1	1
DMAP1	DMAP1	1	0.548	2.28922e-06	1.49517e-06	8.64544e-06	0	0	0	0	0	0	0	0	0	0	0	0	0	0	0	0	0	0	0	0	0	0	0	0	2	3	1	4	40	32	4	1	0	1	9	6	0	0	0	0	3.54636	1	1.65604
C1QC	C1QC	1	1.094	6.50017e-07	6.8057e-10	3.11603e-06	0	0	0	0	0	0	2	0	0	0	0	0	0	0	0	0	0	0	0	0	0	0	0	0	0	0	0	0	9	15	1	0	0	0	1	2	0	0	0	0	5.8627	1	1
MYT1	MYT1	20	0.304	5.03388e-06	2.43263e-06	1.66626e-05	0	0	0	0	0	0	0	0	0	0	0	0	0	0	0	0	0	0	0	0	0	0	0	0	1	2	13	2	82	81	1	2	0	2	8	11	0	0	1	0	1	3.97933	1.46961
ESCO1	ESCO1	18	0.17	3.23208e-06	2.71476e-06	6.96803e-07	0	0	0	0	0	0	1	0	0	0	0	0	0	0	0	0	0	0	0	0	0	0	0	0	0	0	11	4	2	1	1	1	0	3	0	0	0	0	0	0	5.68721	1	1.02498
EED	EED	11	0.187	2.21921e-06	3.15886e-06	4.54784e-06	0	0	0	0	0	0	0	0	1	0	0	0	0	0	0	0	0	0	0	0	0	0	0	0	0	0	2	3	25	34	0	0	1	0	2	3	0	0	0	0	1	5.8264	1
MAGOHB	MAGOHB	12	0.741	8.1869e-07	8.31463e-07	5.86338e-07	0	0	0	0	0	0	0	0	0	0	0	0	0	0	0	0	0	0	0	0	0	0	0	0	0	1	3	0	8	3	0	0	3	2	0	0	0	0	0	0	1	5.01507	1.16092
STRADB	STRADB	2	0.689	1.76545e-06	1.74372e-07	4.58288e-06	0	0	0	0	0	0	0	0	0	0	2	0	0	0	0	0	0	0	0	0	0	0	0	0	0	1	1	0	4	5	0	1	0	1	4	3	0	0	0	0	1	1	5.81161
DPP6	DPP6	7	0.377	3.89136e-06	6.8057e-10	1.23568e-05	0	0	0	0	1	0	1	0	0	0	0	0	0	0	0	0	0	0	0	0	0	0	0	0	1	2	0	0	38	44	2	0	0	0	5	8	0	0	0	0	5.81123	1	1
SOX6	SOX6	11	0.215	3.71649e-06	2.94477e-06	2.89328e-06	0	0	0	0	0	0	0	0	0	0	1	1	0	0	0	0	0	0	0	0	0	0	0	0	0	0	4	2	9	8	2	0	3	3	2	2	1	0	0	0	2.78732	1.94077	1.07323
CHAMP1	CHAMP1	13	0.271	1.97834e-06	6.8057e-10	1.76072e-09	0	0	0	0	0	0	1	0	0	0	0	0	0	0	0	0	0	0	0	0	0	0	0	0	0	0	0	0	0	0	0	0	0	0	0	0	0	0	0	0	5.79547	1	1
CTTN	CTTN	11	0.43	3.40528e-06	6.8057e-10	7.18776e-06	0	0	0	0	0	0	0	0	0	0	0	0	0	0	0	0	0	0	1	0	0	0	0	0	2	1	0	0	35	35	1	1	0	0	11	5	0	0	0	0	3.84461	1	1.50681
ADAP1	ADAP1	7	0.439	2.4182e-06	6.8057e-10	6.61985e-06	0	0	0	0	2	0	0	0	0	0	1	0	0	0	0	0	0	0	0	0	0	0	0	0	0	2	0	0	37	33	0	0	0	0	0	2	0	0	0	0	1	1	5.77954
OAF	OAF	11	1.181	6.33753e-07	6.8057e-10	5.57746e-06	0	0	0	0	2	0	0	0	0	0	0	0	0	0	0	0	0	0	0	0	0	0	0	0	0	0	0	0	23	22	0	3	0	0	3	5	0	0	0	0	1	1	5.76294
NUAK1	NUAK1	12	0.496	2.61601e-06	6.8057e-10	1.26278e-05	1	0	0	0	1	0	0	0	0	0	0	0	0	0	0	0	0	0	0	0	0	0	0	0	2	0	0	0	82	73	0	0	0	0	10	24	0	0	0	0	3.4821	1	1.6515
DNAJC3	DNAJC3	13	0.516	2.79792e-06	6.8057e-10	4.65643e-06	0	0	0	0	0	0	0	0	0	0	0	0	0	0	0	0	0	0	0	0	0	0	0	0	4	2	0	0	22	14	4	2	0	0	3	3	0	0	0	0	4.28633	1	1.34019
ZIC5	ZIC5	13	0.519	7.56313e-07	5.11591e-07	2.17048e-06	0	0	0	0	0	0	0	0	0	0	0	0	0	0	0	0	0	0	0	0	0	0	0	0	17	7	0	0	0	0	0	0	0	0	0	0	0	0	0	0	5.74334	1	1
FLII	FLII	17	0.607	5.89349e-06	6.8057e-10	1.04855e-05	0	0	0	0	2	0	0	0	0	0	0	0	0	0	0	0	0	0	0	0	0	0	0	0	4	3	0	0	67	59	2	2	0	0	8	18	0	0	0	0	1.15807	1	4.9504
TCF7L1	TCF7L1	2	0.447	2.01854e-06	1.61912e-06	4.46563e-06	1	0	0	0	1	0	0	0	0	0	0	0	0	0	0	0	0	0	0	0	0	0	0	0	0	1	5	3	19	12	0	0	0	0	0	1	0	0	0	0	2.64212	1.50089	1.43922
DHFRL1	DHFR2	3	1.435	3.34196e-07	6.8057e-10	6.42357e-08	0	0	0	0	0	0	2	0	0	0	0	0	0	0	0	0	0	0	0	0	0	0	0	0	0	0	0	0	0	0	0	0	0	0	0	0	0	0	0	0	5.69493	1	1
EMX1	EMX1	2	0.409	5.24627e-07	4.70622e-06	7.28603e-06	1	0	0	0	0	0	0	0	0	0	1	0	0	0	0	0	0	0	0	0	0	0	0	0	1	0	11	9	20	21	0	0	0	2	1	0	0	0	0	0	5.54125	1	1.02636
PTPN13	PTPN13	4	0.642	1.03371e-05	6.8057e-10	1.76072e-09	1	0	0	0	0	0	0	0	0	0	0	0	0	0	0	0	0	0	0	0	0	0	0	0	21	18	0	0	0	0	5	2	0	0	0	0	0	0	0	0	5.68324	1	1
FGF17	FGF17	8	0.305	6.97839e-07	4.38689e-06	3.6131e-06	0	0	0	0	0	0	0	0	0	0	0	0	0	0	0	0	0	0	0	0	0	0	0	0	0	0	2	4	11	8	0	0	4	0	3	5	0	0	0	0	1	5.11093	1.11062
HSPA14	HSPA14	10	0.395	2.91852e-06	6.8057e-10	5.06624e-06	0	0	0	0	0	0	0	0	0	0	0	0	0	0	0	0	0	0	1	0	0	0	0	0	2	3	0	0	28	14	1	1	0	0	6	3	0	0	0	0	3.25339	1	1.74113
EPS8L2	EPS8L2	11	0.627	3.34012e-06	6.8057e-10	1.76072e-09	0	0	0	0	0	0	0	0	0	0	0	0	0	0	0	1	0	0	0	0	0	0	0	0	20	15	0	0	0	0	0	0	0	0	0	0	0	0	0	0	5.66153	1	1
ZNF208	ZNF208	19	1.855	3.7458e-07	6.8057e-10	1.76072e-09	0	0	0	0	0	0	2	1	0	0	0	0	0	0	0	0	0	0	0	0	0	0	0	0	1	3	0	0	0	0	4	8	0	0	0	0	0	0	0	0	5.65979	1	1
ZEB1	ZEB1	10	0.317	3.47948e-06	9.8505e-07	4.06941e-06	0	0	0	0	0	0	1	0	0	0	0	0	0	0	0	0	0	0	0	0	0	0	0	0	1	0	1	1	18	8	0	0	0	1	3	3	0	0	0	0	4.10996	1	1.37631
CHPF	CHPF	2	0.506	2.39827e-06	1.4878e-06	9.8935e-06	0	0	0	0	0	0	0	0	0	0	0	0	0	0	0	1	0	0	0	0	0	0	0	0	11	6	1	4	18	25	0	1	1	0	0	3	0	0	0	0	5.65013	1	1
PRPF39	PRPF39	14	0.238	2.62606e-06	6.8057e-10	5.2788e-06	1	0	0	0	0	0	0	0	0	0	0	0	0	0	0	0	0	0	0	0	0	0	0	1	2	2	0	0	31	30	0	0	0	0	0	0	0	0	0	0	4.86621	1	1.16003
COPS5	COPS5	8	0.144	1.92742e-06	2.58284e-06	4.10937e-06	0	0	0	0	0	0	0	0	0	0	0	0	0	0	0	0	0	0	0	0	1	0	0	0	0	0	3	2	1	4	1	0	0	2	3	1	0	0	0	0	1.68818	3.33775	1
FBXO18	FBH1	10	0.479	4.83455e-06	9.84319e-07	1.37427e-05	1	0	0	0	1	0	0	0	0	0	1	0	0	0	0	0	0	0	0	0	0	0	0	0	5	3	2	2	50	49	0	0	1	0	4	8	0	0	0	0	2.82477	1.73918	1.14481
ILF2	ILF2	1	0.247	2.479e-06	2.85747e-06	5.13978e-06	1	0	0	0	0	0	0	0	0	0	0	0	0	0	0	0	0	0	0	0	0	0	0	0	0	0	5	8	5	8	0	0	1	7	3	7	0	0	0	0	5.62226	1	1
MTCH1	MTCH1	6	0.439	1.93144e-06	1.97663e-06	6.26854e-06	0	0	0	0	0	0	0	0	1	0	0	0	0	0	0	0	0	0	0	0	0	0	0	0	2	2	4	5	10	17	0	0	0	0	2	6	0	0	0	0	1	5.61946	1
GRK5	GRK5	10	0.382	2.86358e-06	3.13354e-06	7.12194e-06	0	0	0	1	1	0	0	0	0	0	0	0	0	0	0	0	0	0	0	0	0	0	0	0	0	1	31	17	33	41	0	1	0	3	2	7	0	0	0	0	1	5.61551	1
SETD2	SETD2	3	0.206	1.02341e-05	5.26545e-06	1.57269e-05	1	0	0	0	0	0	1	0	0	0	0	0	0	0	0	0	0	0	1	0	0	0	0	0	2	5	8	12	82	80	1	0	0	2	7	8	0	0	0	0	3.63825	1	1.53828
TSSK6	TSSK6	19	0.539	1.05131e-06	4.57656e-06	7.26182e-06	0	0	0	0	0	0	0	0	0	0	0	0	0	0	0	0	0	0	0	0	0	0	0	0	0	0	15	12	37	36	0	0	4	3	4	2	0	0	0	0	1	4.37619	1.27869
ERCC6	ERCC6	10	0.802	7.68121e-06	6.8057e-10	1.76072e-09	0	0	0	0	0	0	0	0	0	0	0	0	0	0	0	0	0	0	0	0	0	0	0	0	17	12	0	0	1	0	8	5	0	0	0	0	0	0	0	0	5.43886	1	1.02794
LHX8	LHX8	1	0.473	1.48016e-06	9.18714e-07	3.15336e-06	0	0	0	0	0	0	0	0	0	0	0	0	0	0	0	0	0	0	0	0	0	0	0	0	0	2	5	0	2	4	0	0	1	0	1	0	0	0	0	0	1	5.58811	1
GABRB1	GABRB1	4	0.306	2.59759e-06	4.47997e-06	3.20797e-06	1	0	0	0	0	0	0	0	1	0	1	0	0	0	0	0	0	0	0	0	0	0	0	0	0	1	8	13	6	4	1	1	2	2	0	0	0	0	0	0	3.55556	1.16781	1.34143
ZNF483	ZNF483	9	0.324	2.44466e-06	6.8057e-10	7.48846e-06	0	0	0	0	1	0	0	0	0	0	2	0	0	0	0	0	0	0	0	0	0	0	0	0	0	0	0	0	35	34	1	1	0	0	7	9	0	0	0	0	1.0701	1	5.20477
PER2	PER2	2	0.347	4.61831e-06	6.8057e-10	9.28125e-07	1	0	0	0	0	0	0	0	0	0	0	0	0	0	0	0	0	0	0	0	0	0	0	0	5	2	0	0	22	22	0	0	0	0	1	1	0	0	0	0	4.81569	1	1.15576
ZNF296	ZNF296	19	0.33	1.15771e-06	7.58426e-08	9.1141e-06	1	0	0	0	0	0	0	0	0	0	0	0	0	0	0	0	0	0	0	0	0	0	0	0	0	0	0	0	33	43	0	0	0	0	6	13	0	0	0	0	5.56086	1	1
RANBP10	RANBP10	16	0.321	3.0227e-06	6.8057e-10	9.94241e-06	0	0	0	0	2	0	0	0	0	0	0	0	0	0	0	0	0	0	0	0	0	0	0	0	1	2	0	0	62	54	0	1	0	0	6	7	0	0	0	0	1	1	5.55254
ZRANB2	ZRANB2	1	0.181	3.04364e-06	2.40031e-06	1.05705e-06	0	0	0	0	0	0	0	0	1	0	0	0	0	0	0	0	0	0	0	0	0	0	0	0	2	0	3	1	3	2	0	1	0	1	2	0	0	0	0	0	1	5.06324	1.09591
SENP3	SENP3	17	0.363	3.56055e-06	3.29539e-06	2.69763e-06	1	0	0	0	0	0	0	0	0	0	0	0	0	0	0	0	0	0	0	0	0	0	0	0	1	0	1	2	9	10	1	0	2	4	4	6	0	0	0	0	5.31916	1	1.04317
RHOV	RHOV	15	0.522	8.82842e-07	2.7531e-06	5.50259e-06	0	0	0	0	0	0	1	0	0	0	1	0	0	0	0	0	0	0	0	0	0	0	0	0	3	0	4	5	18	20	0	0	1	2	1	0	0	0	0	0	4.9066	1	1.1294
MATK	MATK	19	0.765	2.59039e-06	6.8057e-10	1.20093e-05	0	0	0	0	0	0	0	0	0	0	2	0	0	0	0	0	0	1	0	0	0	0	0	0	3	3	0	0	58	51	0	0	0	0	2	7	0	0	0	0	1	1	5.53664
STAU1	STAU1	20	0.168	2.60127e-06	6.8057e-10	7.85962e-06	0	0	0	0	0	0	0	0	0	0	0	0	0	0	0	0	0	0	1	0	0	0	0	0	0	2	0	0	32	28	0	0	0	0	7	12	0	0	0	0	4.40912	1	1.25372
CRH	CRH	8	0.72	2.98519e-07	2.35113e-06	5.46496e-06	0	0	0	0	0	0	0	0	0	0	0	0	0	0	0	0	0	0	0	0	0	0	0	0	0	0	18	11	12	11	0	0	1	1	0	0	0	0	0	0	1	5.38945	1.02522
SCMH1	SCMH1	1	0.682	2.99356e-06	3.61151e-06	4.23761e-06	1	1	0	0	0	1	0	0	0	0	0	0	0	0	0	0	0	0	0	0	0	0	0	0	5	2	13	12	10	14	0	0	3	1	3	4	0	0	0	0	1.33597	4.13362	1
KLHL32	KLHL32	6	0.546	2.37029e-06	6.8057e-10	9.89943e-06	1	0	0	0	0	0	0	0	0	0	1	0	0	0	0	0	0	0	0	0	0	0	0	0	3	0	0	0	53	48	1	1	0	0	8	16	0	0	0	0	3.99233	1	1.38269
IGLL5	IGLL5	22	1.968	5.37876e-07	2.94447e-07	1.24922e-06	2	0	0	0	0	0	0	0	0	0	0	0	0	0	0	0	0	0	0	0	0	0	0	0	1	2	0	0	0	0	0	0	0	0	0	0	0	0	0	0	5.51446	1	1
NCK2	NCK2	2	0.541	1.02786e-06	1.56682e-06	1.00992e-05	0	0	0	0	0	0	0	0	0	0	0	0	0	0	0	0	0	0	0	0	0	0	1	0	0	0	3	4	24	21	0	0	3	0	4	9	0	0	0	0	1	4.81168	1.14427
KPNA3	KPNA3	13	0.332	2.54768e-06	4.33804e-06	4.40375e-06	0	0	0	0	0	0	0	0	0	0	0	1	0	0	0	0	0	0	0	0	0	0	0	0	2	0	9	2	18	15	0	0	1	1	2	3	0	0	0	0	1.29061	3.73796	1.1401
RICTOR	RICTOR	5	0.155	1.06738e-05	2.99348e-06	1.8924e-05	0	0	1	0	0	0	0	0	0	0	1	0	0	0	0	0	0	0	0	0	0	0	0	0	1	1	7	6	60	62	3	0	1	3	7	12	0	0	0	0	1.75985	2.83792	1.09987
P4HTM	P4HTM	3	1.005	1.95942e-06	4.23962e-06	5.39535e-06	0	0	0	0	0	0	0	1	1	0	1	0	0	0	0	0	0	0	0	0	0	0	0	0	3	1	10	8	9	16	0	0	1	1	3	2	0	0	0	0	1.03778	5.25455	1.00626
CHAF1A	CHAF1A	19	0.118	3.15788e-06	8.00021e-07	5.76766e-06	1	0	0	0	0	0	0	0	0	0	0	0	0	0	0	0	0	0	0	0	0	0	0	0	2	0	1	3	26	17	0	1	0	0	5	9	0	0	0	0	4.05076	1	1.35404
CENPA	CENPA	2	1.19	8.37165e-07	1.39514e-06	3.41014e-06	0	0	0	0	0	0	0	0	0	0	0	0	0	0	0	0	0	1	0	0	0	0	0	0	0	0	3	0	7	6	0	0	1	0	0	0	0	0	0	0	1	3.27701	1.67215
ADCK2	ADCK2	7	0.92	2.08537e-06	6.8057e-10	7.84912e-06	0	0	0	0	0	0	0	0	0	0	0	0	0	0	0	0	0	0	0	0	0	0	0	0	40	33	0	0	93	74	1	1	0	0	6	1	0	0	0	0	1.90228	1	2.88019
TCTEX1D4	TCTEX1D4	1	1.705	4.93623e-07	1.36885e-06	5.7102e-06	0	0	0	0	0	0	0	0	0	0	0	0	0	0	0	0	0	0	0	0	0	0	0	0	1	2	18	12	32	28	0	0	0	0	0	0	0	0	0	0	1	4.42549	1.23702
LRRC8D	LRRC8D	1	0.312	2.27984e-06	2.86679e-07	1.04538e-05	0	0	0	0	0	0	0	0	0	0	0	0	0	0	0	0	0	0	0	0	0	0	0	0	5	1	0	0	31	20	1	0	0	0	9	3	0	0	0	0	3.23134	1	1.68936
TCP10L2	TCP10L2	6	1.321	1.53107e-06	3.02625e-06	5.26111e-06	0	0	0	0	2	0	0	0	0	0	0	0	0	0	0	0	0	0	0	0	0	0	0	0	0	0	1	4	4	2	0	0	2	3	1	0	0	0	0	0	1	1	5.45615
ZBTB7A	ZBTB7A	19	0.329	1.32278e-06	1.35737e-06	5.75876e-06	0	0	0	0	0	0	1	0	0	0	0	0	0	0	0	0	0	0	0	0	0	0	0	0	0	0	0	0	0	0	0	0	0	0	0	0	0	0	0	0	5.45201	1	1
FSIP2	FSIP2	2	0.512	1.54757e-05	6.8057e-10	4.28719e-05	0	0	0	0	0	0	0	0	0	0	0	0	0	0	0	0	0	0	0	0	0	0	0	0	4	5	0	0	342	338	0	0	0	0	8	10	0	0	0	0	1	1	5.41075
IPP	IPP	1	0.687	2.88887e-06	6.8057e-10	1.76072e-09	0	0	0	0	0	0	1	0	0	0	0	0	0	0	0	0	0	0	0	0	0	0	0	0	3	6	0	0	0	0	5	1	0	0	0	0	0	0	0	0	5.40381	1	1
HPS6	HPS6	10	0.714	2.6733e-06	6.8057e-10	1.10241e-05	0	0	0	0	1	0	1	0	0	0	1	0	0	0	0	0	0	0	0	0	0	0	0	0	13	6	0	0	72	62	0	1	0	0	8	5	0	0	0	0	2.70152	1	1.99716
MAPK1	MAPK1	22	0.175	1.39303e-06	3.58298e-06	5.08426e-06	0	0	0	0	0	0	0	0	1	0	0	0	0	0	0	0	0	0	0	0	0	0	0	0	0	0	1	0	15	10	0	0	1	1	1	2	0	0	0	0	1	4.76905	1.13129
GPR137	GPR137	11	0.435	1.94736e-06	1.05407e-06	6.86191e-06	0	0	0	0	1	0	0	0	0	0	0	0	0	0	0	0	0	0	0	0	0	0	0	0	2	2	3	2	31	34	0	0	2	0	8	6	0	0	0	0	1	4.18918	1.28762
KCNS2	KCNS2	8	0.774	8.67449e-07	3.50889e-07	9.88864e-06	0	0	0	0	0	0	0	0	0	0	0	0	0	0	0	0	0	0	0	0	0	0	0	0	0	1	0	2	36	34	0	0	3	0	8	11	0	0	0	0	1	4.30818	1.2518
CAPN1	CAPN1	11	0.706	4.30977e-06	6.8057e-10	1.16572e-05	0	0	0	0	0	1	1	0	0	0	0	0	0	0	0	0	0	0	0	0	0	0	0	0	12	5	0	0	92	71	0	1	0	0	5	9	0	0	0	0	2.23294	1	2.41381
AXIN2	AXIN2	17	0.396	3.03895e-06	6.8057e-10	1.76072e-09	0	0	0	0	0	0	1	0	0	0	0	0	0	0	0	0	0	0	0	0	0	0	0	0	3	0	0	0	0	0	0	0	0	0	0	0	0	0	0	0	5.37983	1	1
PCNP	PCNP	3	0.502	9.46124e-07	1.94434e-09	1.32812e-06	0	0	0	0	0	0	0	0	0	0	0	0	0	0	0	0	0	0	1	0	0	0	0	0	0	0	0	0	13	18	1	0	0	0	1	0	0	0	0	0	5.37838	1	1
RASL10B	RASL10B	17	1.127	8.10834e-07	3.87659e-06	3.60852e-06	0	0	0	0	0	0	0	0	0	0	0	0	0	0	0	0	0	0	0	0	0	0	0	0	3	0	16	12	16	30	0	1	6	6	3	3	0	0	0	0	1	5.37822	1
HIST2H3D	H3C13	1	1.924	1.99911e-07	4.02566e-06	2.1181e-06	0	0	0	0	0	0	0	0	0	0	1	0	0	0	0	0	0	0	0	0	0	0	0	0	0	0	0	0	0	0	1	0	3	1	4	2	0	0	0	0	1	3.45625	1.55133
ATP8A1	ATP8A1	4	0.346	6.76516e-06	6.8057e-10	1.49657e-05	0	0	0	0	0	0	1	0	0	0	0	0	0	0	0	0	0	0	0	0	0	0	0	0	11	4	0	0	50	52	1	2	0	0	9	15	0	0	0	0	4.73166	1	1.12961
MED25	MED25	19	0.652	3.3639e-06	1.58701e-06	9.49801e-06	0	0	0	0	0	0	1	0	0	0	0	0	0	0	0	0	0	0	0	0	0	0	0	0	5	1	0	0	44	36	0	1	1	0	9	10	0	0	0	0	1.93755	1.74482	1.58095
HDAC5	HDAC5	17	0.141	4.32251e-06	2.69713e-06	1.78724e-05	0	0	0	0	0	0	0	0	0	0	1	0	0	0	0	0	0	0	0	0	0	0	0	0	1	1	3	0	83	53	2	0	1	3	4	5	0	0	0	0	2.09606	1	2.54979
LCOR	LCOR	10	0.345	1.80247e-06	6.8057e-10	1.13477e-06	0	0	0	0	0	0	0	0	0	0	0	0	0	0	0	0	0	0	1	0	0	0	0	0	0	0	0	0	0	1	0	0	0	0	1	1	0	0	0	0	5.34036	1	1
ZFYVE28	ZFYVE28	4	0.456	2.60848e-06	2.42242e-06	5.96394e-06	0	0	0	0	0	0	0	0	1	0	0	0	0	0	0	0	0	0	0	0	0	0	0	0	1	2	12	13	23	25	0	0	0	0	0	2	0	0	0	0	1	5.33932	1
MRPL45	MRPL45	17	0.916	1.78756e-06	1.21409e-06	3.12251e-06	0	0	0	0	0	0	0	0	0	0	0	0	0	0	0	0	0	0	0	0	0	0	0	0	0	1	12	6	18	17	3	5	0	0	5	3	0	0	0	0	1.04093	4.13592	1.23708
GPRIN1	GPRIN1	5	0.32	1.65435e-06	6.8057e-10	1.76072e-09	0	0	0	0	0	0	1	0	0	0	0	0	0	0	0	0	0	0	0	0	0	0	0	0	0	0	0	0	0	0	0	0	0	0	0	0	0	0	0	0	5.32512	1	1
RNPEPL1	RNPEPL1	2	0.789	1.80883e-06	3.44089e-07	1.0349e-05	0	0	0	0	2	0	0	0	0	0	0	1	0	0	0	0	0	0	0	0	0	0	0	0	3	0	1	0	24	25	0	0	0	0	6	6	0	0	0	0	1.22646	1.23897	3.50269
PRKCA	PRKCA	17	0.395	3.6974e-06	2.33416e-06	9.56735e-06	0	0	0	0	2	1	0	0	0	0	0	0	0	0	0	0	0	0	0	0	0	0	0	0	3	1	3	2	21	26	0	0	1	0	5	10	0	0	0	0	1.21698	1.86115	2.34973
SPTBN4	AC020929.1	19	0.191	8.55155e-06	3.653e-06	1.54982e-05	1	0	0	0	0	0	0	0	0	0	0	0	0	0	0	0	0	0	1	0	0	0	0	0	2	2	0	0	0	0	0	0	0	0	0	0	0	0	0	0	5.30759	1	1
ARAP3	ARAP3	5	0.433	7.08223e-06	6.8057e-10	2.20457e-05	0	0	0	0	0	0	1	0	0	0	0	0	0	0	0	0	0	0	0	0	0	0	1	0	3	4	0	0	122	129	3	1	0	0	18	31	0	0	0	0	3.42997	1	1.54587
CCDC85B	CCDC85B	11	1.137	3.01818e-07	5.07672e-06	3.66399e-06	0	0	0	0	0	0	0	0	0	0	0	0	0	0	0	0	0	0	0	0	0	0	0	0	0	0	13	6	16	6	0	0	0	0	0	0	0	0	0	0	1	4.06229	1.30377
CAMSAP3	CAMSAP3	19	0.154	4.55114e-06	1.20084e-06	3.56623e-05	0	1	0	0	1	0	0	0	0	0	0	0	0	0	0	0	0	1	0	0	0	0	0	0	2	2	10	8	116	111	1	0	1	0	5	14	0	0	0	0	1.09132	2.93922	1.65052
SH3TC2	SH3TC2	5	0.813	4.5957e-06	6.8057e-10	1.76072e-09	0	0	0	0	0	0	0	0	0	0	0	0	0	0	0	0	0	0	0	0	0	0	0	0	34	24	0	0	0	0	4	2	0	0	0	0	0	0	0	0	5.28617	1	1
CABIN1	CABIN1	22	0.586	8.78806e-06	3.12053e-06	1.39906e-05	1	0	0	0	1	0	0	0	0	0	2	0	0	0	0	0	0	0	0	0	0	0	1	0	22	8	7	7	77	75	0	6	2	4	10	17	0	0	0	0	1.52557	1	3.46063
LHX3	LHX3	9	0.742	1.23697e-06	2.82712e-06	7.08895e-06	0	0	0	0	0	0	0	0	0	0	0	0	0	0	0	0	0	0	0	0	0	0	0	0	0	3	20	13	33	35	0	0	0	0	0	2	0	0	0	0	1	5.16085	1.02251
USPL1	USPL1	13	0.456	3.19221e-06	6.8057e-10	1.76072e-09	0	0	0	0	0	0	1	0	0	0	0	0	0	0	0	0	0	0	0	0	0	0	0	0	0	0	0	0	0	0	2	1	0	0	0	0	0	0	0	0	5.25643	1	1
HMCN2	HMCN2	9	1.015	2.59156e-06	1.2068e-06	5.11998e-06	0	0	0	0	0	0	2	0	0	0	0	0	0	0	0	0	0	0	1	0	0	0	0	0	93	114	0	0	0	0	0	0	0	0	0	0	0	0	0	0	5.24521	1	1
RRP9	RRP9	3	0.439	2.54533e-06	6.8057e-10	7.48483e-06	0	0	0	0	0	0	0	0	0	0	0	0	0	0	0	0	0	0	0	0	0	0	0	0	5	1	0	0	51	39	1	0	0	0	10	12	0	0	0	0	2.80324	1	1.8701
SRSF11	SRSF11	1	0.233	3.07111e-06	3.69594e-07	4.7048e-06	1	0	0	0	0	0	0	0	0	0	0	0	0	0	0	0	0	0	0	0	0	0	0	0	0	0	2	3	10	16	0	0	1	3	0	2	0	0	0	0	5.23759	1	1
ARNT2	ARNT2	15	0.291	3.17748e-06	1.02166e-06	7.18101e-06	0	0	0	0	1	0	0	0	0	0	0	0	0	0	0	0	0	0	0	0	0	0	0	0	3	2	8	0	38	35	0	0	0	1	8	12	0	0	0	0	1.04602	3.64902	1.37142
DOPEY1	DOP1A	6	0.252	1.10595e-05	2.24074e-06	7.86104e-06	0	0	0	0	0	0	0	0	0	0	0	0	0	0	0	0	0	0	0	0	0	0	0	0	12	5	4	2	42	36	3	2	0	2	6	5	0	0	0	0	3.5104	1	1.49055
YTHDF1	YTHDF1	20	0.241	1.41939e-06	6.8057e-10	8.70265e-06	1	0	0	0	0	0	0	0	0	0	0	0	0	0	0	0	0	0	0	0	0	0	0	0	1	2	0	0	18	22	0	0	0	0	5	7	0	0	0	0	5.22979	1	1
RBMS3	RBMS3	3	0.455	2.46443e-06	6.8057e-10	5.39138e-06	0	0	0	0	0	0	0	0	0	0	0	0	0	0	0	0	0	0	1	0	0	0	0	0	0	0	0	0	34	26	0	0	0	0	4	4	0	0	0	0	3.57473	1	1.45796
BNC2	BNC2	9	0.34	4.05936e-06	2.48844e-06	6.43553e-07	0	0	0	0	0	0	0	0	0	0	0	0	0	0	0	0	0	0	0	0	0	0	0	0	1	2	10	3	6	2	1	1	0	0	0	0	0	0	0	0	1	4.63504	1.12131
NFYC	NFYC	1	0.491	2.29408e-06	1.69276e-06	5.24668e-06	0	0	0	0	1	0	0	0	0	0	0	0	0	0	0	0	0	0	0	0	0	0	0	0	0	0	29	24	13	10	0	0	1	1	1	3	0	0	0	0	1	4.31347	1.2042
UBR3	UBR3	2	0.13	7.56313e-06	7.06146e-06	1.92671e-05	1	0	0	0	0	0	0	0	0	0	0	0	0	0	0	0	0	0	0	0	0	0	0	0	2	3	14	10	69	61	0	0	2	1	5	8	0	0	0	0	1.31829	2.77557	1.4165
KIAA1549	KIAA1549	7	0.295	5.88729e-06	6.8057e-10	1.76072e-09	0	0	0	0	0	0	0	0	0	0	0	0	0	0	0	0	0	0	0	0	0	0	0	0	0	0	0	0	0	0	4	1	0	0	0	0	0	0	0	0	5.18245	1	1
BCAR1	BCAR1	16	0.246	2.97664e-06	6.8057e-10	1.76072e-09	1	0	0	0	0	0	0	0	0	0	0	0	0	0	0	0	0	0	0	0	0	0	0	0	0	0	0	0	0	0	0	0	0	0	0	0	0	0	0	0	5.18218	1	1
VCPIP1	VCPIP1	8	0.119	3.96288e-06	7.6285e-07	1.55106e-05	1	0	0	0	1	0	0	1	0	0	1	0	0	0	0	0	0	0	0	0	0	0	0	0	0	0	0	0	30	32	0	0	0	0	6	20	0	0	0	0	5.18	1	1
EYA3	EYA3	1	0.264	2.62623e-06	1.2287e-06	4.70809e-06	0	0	0	0	0	0	0	0	1	0	0	0	0	0	0	0	0	0	0	0	0	0	0	0	1	2	2	6	24	16	1	0	3	4	1	2	0	0	0	0	1.11455	3.6158	1.28469
RFX7	RFX7	15	0.132	3.92737e-06	6.8057e-10	1.76072e-09	1	0	0	0	0	0	0	0	0	0	0	0	0	0	0	0	0	0	0	0	0	0	0	0	0	0	0	0	0	0	0	0	0	0	0	0	0	0	0	0	5.16472	1	1
UBE3A	UBE3A	15	0.206	3.44765e-06	4.02373e-06	9.85786e-06	1	0	0	0	0	0	0	0	0	0	0	0	0	0	0	0	0	0	0	0	0	0	0	0	0	0	1	0	16	20	0	0	1	1	6	5	0	0	0	0	5.15378	1	1
HSPA12B	HSPA12B	20	0.618	2.53964e-06	3.19304e-06	1.54803e-05	0	0	0	0	0	0	0	1	0	0	0	0	0	0	0	0	0	0	0	0	0	0	0	1	3	7	22	18	89	76	1	1	0	0	4	4	0	0	0	0	1	2.64025	1.94937
ABI2	ABI2	2	0.46	2.17331e-06	2.91952e-07	8.03418e-06	0	0	0	0	2	0	0	0	0	0	0	0	0	0	0	0	0	0	0	0	0	0	0	0	1	0	0	0	28	18	0	1	0	0	4	10	0	0	0	0	1	1	5.13876
KLHL14	KLHL14	18	0.495	2.46058e-06	6.8057e-10	1.12309e-05	0	0	0	0	2	0	0	0	0	0	0	0	0	0	0	0	0	0	0	0	0	0	0	0	1	0	0	0	49	39	0	1	0	0	10	10	0	0	0	0	1	1	5.1375
GSK3B	GSK3B	3	0.334	2.8877e-06	1.99389e-06	4.55378e-06	1	0	0	0	1	0	0	0	0	0	0	0	0	0	0	0	0	0	0	0	0	0	0	0	0	1	1	0	12	6	0	0	1	1	3	2	0	0	0	0	2.97658	1.17877	1.46204
WLS	WLS	1	0.545	2.37314e-06	6.8057e-10	1.19629e-07	0	0	0	0	0	0	0	0	0	0	0	0	0	0	0	0	0	0	1	0	0	0	0	0	2	3	0	0	0	0	2	0	0	0	0	0	0	0	0	0	5.12752	1	1
ZNF2	ZNF2	2	0.642	1.71453e-06	6.8057e-10	4.62484e-06	0	0	0	0	0	0	0	1	0	0	0	0	0	0	0	1	0	1	0	0	0	0	0	0	2	0	0	0	45	52	0	0	0	0	5	10	0	0	0	0	2.88786	1	1.77454
BCL11A	BCL11A	2	0.322	1.84652e-06	6.8057e-10	1.76072e-09	1	0	0	0	0	0	0	0	0	0	0	0	0	0	0	0	0	0	0	0	0	0	0	0	0	0	0	0	0	0	0	0	0	0	0	0	0	0	0	0	5.12428	1	1
ZNF479	ZNF479	7	1.788	5.05481e-07	2.25316e-06	5.5315e-06	0	0	0	0	0	0	0	0	0	0	0	0	0	0	0	0	0	0	0	0	0	0	0	0	0	0	4	0	0	0	0	2	1	0	11	3	0	0	0	0	1	3.72984	1.37276
MAPK3	MAPK3	16	0.614	1.80381e-06	4.29063e-07	7.03549e-06	0	0	0	0	2	0	0	0	0	0	0	0	0	0	0	0	0	0	0	0	0	0	0	0	0	1	0	0	16	19	1	0	0	0	5	8	0	0	0	0	1.18294	1	4.32769
FNDC1	FNDC1	6	0.589	6.68727e-06	6.8057e-10	1.76072e-09	0	0	0	0	0	0	0	0	0	0	0	0	0	0	0	0	0	0	1	0	0	0	0	0	13	16	0	0	0	0	6	4	0	0	0	0	0	0	0	0	5.11499	1	1
FAM208B	TASOR2	10	0.332	7.56329e-06	6.8057e-10	1.76072e-09	1	0	0	0	0	0	0	0	0	0	0	0	0	0	0	0	0	0	0	0	0	0	0	0	2	0	0	0	0	0	2	0	0	0	0	0	0	0	0	0	5.10442	1	1
FUCA1	FUCA1	1	0.944	2.00364e-06	6.8057e-10	5.43996e-06	0	0	0	0	0	0	0	0	0	0	2	0	0	0	0	0	0	0	0	0	0	0	0	0	3	4	0	0	21	27	0	1	0	0	4	4	0	0	0	0	1	1	5.10232
LMBRD2	LMBRD2	5	0.547	3.44028e-06	6.8057e-10	6.59494e-06	1	0	0	0	0	0	1	0	0	0	0	0	0	0	0	0	0	0	0	0	0	0	0	0	5	5	0	0	25	15	1	2	0	0	1	4	0	0	0	0	4.0049	1	1.2704
TMPRSS5	TMPRSS5	11	1.05	1.88639e-06	6.8057e-10	1.76072e-09	0	0	0	0	0	0	2	0	0	0	0	0	0	0	0	0	0	0	0	0	0	0	0	0	15	13	0	0	0	0	0	1	0	0	0	0	0	0	0	0	5.08066	1	1
NCOA3	NCOA3	20	0.335	6.87855e-06	6.8057e-10	1.76072e-09	0	0	0	0	0	0	1	0	0	0	0	0	0	0	0	0	0	0	0	0	0	0	0	0	4	1	0	0	0	0	2	1	0	0	0	0	0	0	0	0	5.0676	1	1
ZCCHC24	ZCCHC24	10	0.332	6.40721e-07	2.97041e-06	3.36374e-06	0	0	0	1	0	0	0	0	0	0	0	0	0	0	0	0	0	0	0	0	0	0	0	0	1	0	26	25	10	7	0	0	4	3	0	0	0	0	0	0	1.18063	3.94436	1.08606
LMNB1	LMNB1	5	0.414	2.27934e-06	6.8057e-10	7.18688e-06	0	0	0	0	0	0	0	0	0	0	0	0	0	0	0	0	0	0	0	0	0	0	0	0	11	2	0	0	21	27	0	0	0	0	0	7	0	0	0	0	5.05355	1	1
BRF1	BRF1	14	0.602	2.75772e-06	9.59502e-07	5.18306e-06	0	0	0	0	0	0	0	0	0	0	0	0	0	0	0	0	0	0	1	0	0	0	0	0	9	7	2	6	29	26	1	0	0	0	0	1	0	0	0	0	4.34902	1	1.16027
TAOK3	TAOK3	12	0.241	5.06151e-06	3.31815e-06	1.08309e-05	0	0	0	0	1	0	0	0	0	0	0	0	0	0	0	0	0	0	1	0	0	0	0	0	1	0	4	4	53	40	0	1	2	1	3	14	0	0	0	0	2.266	1.59081	1.39888
RBM15	RBM15	1	0.276	4.3215e-06	2.08648e-06	1.97756e-05	0	0	0	0	2	0	0	0	0	0	0	0	0	0	0	0	0	0	0	0	0	0	0	0	3	1	3	1	48	49	0	1	1	0	14	15	0	0	0	0	1	2.40189	2.09337
DBF4	DBF4	7	0.282	2.69842e-06	6.8057e-10	1.76072e-09	0	1	0	0	0	0	1	0	0	0	0	0	0	0	0	0	0	0	0	0	0	0	0	0	0	0	0	0	0	0	0	0	0	0	0	0	0	0	0	0	5.02646	1	1
CBLN4	CBLN4	20	1.004	4.42937e-07	2.70063e-06	3.1055e-06	0	0	0	0	0	0	0	0	0	0	0	0	0	0	0	0	0	0	0	0	0	0	0	0	0	0	4	5	8	2	0	0	3	0	3	4	0	0	0	0	1	4.22871	1.18798
ZFPM1	ZFPM1	16	0.474	1.93814e-06	6.0439e-06	1.68381e-05	1	0	0	0	0	0	0	0	0	0	0	0	0	0	0	0	0	0	0	0	0	0	0	0	3	0	31	35	74	85	0	0	1	0	0	0	0	0	0	0	4.94813	1	1.01411
NCSTN	NCSTN	1	0.234	3.91062e-06	1.4195e-06	4.56963e-06	0	0	0	0	0	0	0	0	0	0	0	0	0	0	0	0	0	0	0	0	0	0	0	0	1	1	4	4	26	19	0	1	3	1	1	1	0	0	0	0	1	3.86937	1.29537
DHX9	DHX9	1	0.105	7.77585e-06	1.15685e-05	1.29145e-05	0	0	1	0	0	0	0	0	0	0	0	0	0	0	0	0	0	0	1	0	0	0	1	0	0	0	2	14	28	25	0	0	3	2	9	14	0	0	0	0	4.37433	1	1.14564
KIAA1009	CEP162	6	0.977	4.75449e-06	6.8057e-10	1.76072e-09	0	0	0	0	0	0	2	0	0	0	0	0	0	0	0	0	0	0	0	0	0	0	0	0	18	9	0	0	0	0	2	4	0	0	0	0	0	0	0	0	5.01058	1	1
KDM1A	KDM1A	1	0.276	4.41228e-06	8.71328e-06	1.16765e-05	0	0	0	0	0	0	1	0	0	0	0	0	0	0	0	0	1	0	0	0	0	0	0	0	0	1	11	11	37	30	0	2	5	7	1	3	0	0	0	0	1	4.16624	1.20083
ACACA	ACACA	17	0.216	1.33687e-05	2.81658e-05	1.79933e-05	1	0	0	0	0	0	0	0	0	0	0	0	0	0	0	0	0	0	1	0	0	0	0	0	4	1	68	83	96	96	0	0	21	24	14	15	0	0	0	0	2.79962	1	1.78459
PRKD3	PRKD3	2	0.461	3.98533e-06	6.8057e-10	5.13799e-06	0	0	0	0	0	0	0	0	0	0	2	0	0	0	0	0	0	0	0	0	0	0	0	0	2	0	0	0	4	3	0	1	0	0	1	4	0	0	0	0	1	1	4.99157
ABLIM1	ABLIM1	10	0.326	4.15668e-06	6.8057e-10	8.67534e-06	0	0	0	0	0	0	0	0	0	0	0	0	0	0	0	0	0	0	0	0	0	0	0	0	3	0	0	0	56	37	2	1	0	0	5	7	0	0	0	0	2.51013	1	1.98856
DLK2	DLK2	6	0.458	9.83861e-07	1.1193e-06	4.87255e-06	0	0	0	0	1	0	0	0	0	0	0	0	0	0	0	0	0	0	0	0	0	0	0	0	1	2	10	10	18	18	3	0	0	1	4	1	0	0	0	0	3.64064	1	1.36978
ETS1	ETS1	11	0.389	2.33997e-06	2.45117e-06	4.76976e-06	0	0	0	0	0	0	0	0	0	0	0	0	0	0	0	0	0	0	0	0	0	0	0	0	2	1	2	2	20	24	3	0	1	4	3	10	0	0	0	0	4.98467	1	1
ROBO3	ROBO3	11	0.71	5.19602e-06	5.35344e-06	2.8318e-06	0	1	0	0	0	1	0	0	0	0	0	0	0	0	0	0	0	0	0	0	0	0	0	0	29	27	15	13	20	18	2	0	0	0	3	1	0	0	0	0	3.01791	1.33561	1.23586
NT5C2	NT5C2	10	0.704	2.83192e-06	5.4386e-07	6.59309e-06	0	0	0	0	1	0	0	0	0	0	1	0	0	0	0	0	0	0	0	0	0	0	0	0	5	3	0	0	5	13	6	3	0	0	5	5	0	0	0	0	4.97681	1	1
TRERF1	TRERF1	6	0.114	4.89535e-06	4.84809e-08	1.31771e-05	0	0	0	0	0	0	1	0	0	0	0	0	0	0	0	0	0	0	0	0	0	0	0	0	1	2	0	0	62	39	0	0	0	0	6	14	0	0	0	0	2.54737	1	1.95323
CXXC5	CXXC5	5	0.42	6.19717e-07	1.64719e-07	6.23652e-06	0	0	0	0	0	0	1	0	0	0	0	0	0	0	0	0	0	0	0	0	0	0	0	0	0	0	0	0	23	24	0	0	0	0	4	4	0	0	0	0	4.4893	1	1.10756
LIG3	LIG3	17	0.682	5.08731e-06	6.8057e-10	4.9961e-06	1	0	0	0	0	0	0	0	0	0	0	0	0	0	0	0	0	0	0	0	0	0	0	0	8	15	0	0	23	19	6	2	0	0	7	6	0	0	0	0	3.67299	1	1.35347
CCSER1	CCSER1	4	0.55	3.28434e-06	6.8057e-10	1.76072e-09	1	0	0	0	0	0	0	0	0	0	0	0	0	0	0	0	0	0	0	0	0	0	0	0	4	5	0	0	0	0	3	1	0	0	0	0	0	0	0	0	4.94933	1	1
YAF2	YAF2	12	0.494	7.91203e-07	1.2614e-06	2.26136e-06	0	0	0	0	0	0	0	0	0	0	0	0	0	0	0	0	0	0	0	0	0	0	0	0	2	0	3	0	16	14	0	0	1	0	0	1	0	0	0	0	1.35371	3.33242	1.09712
GRIK4	GRIK4	11	0.409	3.47814e-06	6.8057e-10	1.97565e-05	0	0	0	0	2	0	0	0	0	0	0	0	0	0	0	0	0	0	0	0	0	0	0	0	1	2	0	0	102	82	2	3	0	0	16	15	0	0	0	0	1	1	4.94448
TAF6	TAF6	7	0.784	3.26156e-06	1.6396e-06	9.15337e-06	0	0	0	0	0	0	0	0	0	0	1	0	0	0	0	0	0	0	0	0	1	0	0	0	22	15	1	0	25	30	1	3	0	3	8	7	0	0	0	0	1.72326	2.65701	1.07895
MFAP1	MFAP1	15	0.374	3.86456e-06	3.41836e-06	8.02246e-06	0	0	0	0	0	0	0	0	0	0	0	0	0	0	0	0	0	0	0	0	0	0	0	0	3	1	6	7	31	37	0	0	3	0	9	15	0	0	0	0	1.20814	3.96651	1.03069
DOT1L	DOT1L	19	0.118	5.26419e-06	8.84817e-06	1.76472e-05	1	0	0	0	0	0	0	0	0	0	1	0	0	0	0	0	0	0	0	0	0	0	0	0	1	0	6	7	67	61	0	0	3	2	5	6	0	0	0	0	3.48213	1	1.4171
GFAP	GFAP	17	1.026	1.75925e-06	6.8057e-10	8.29405e-06	0	0	0	0	2	0	0	0	0	0	0	0	0	0	0	0	0	0	0	0	0	0	0	0	3	3	0	0	45	42	0	3	0	0	4	8	0	0	0	0	1	1	4.93344
XIRP2	XIRP2	2	0.928	1.05048e-05	6.8057e-10	1.76072e-09	0	0	0	0	0	0	0	0	0	0	0	0	0	0	0	0	0	0	0	0	0	0	0	0	49	46	0	0	0	0	18	21	0	0	0	0	0	0	0	0	4.92775	1	1
GRIA1	GRIA1	5	0.259	3.91414e-06	8.5008e-06	8.79468e-06	0	0	1	0	0	0	0	0	1	0	0	0	0	0	0	0	0	0	0	0	0	0	0	0	4	1	16	18	28	38	2	1	3	3	8	4	0	0	1	0	2.68439	1.76135	1.03909
PCYT1A	PCYT1A	3	0.858	2.37733e-06	3.10639e-06	2.00047e-06	2	0	0	1	0	0	0	0	0	0	0	0	0	0	0	0	0	0	0	0	0	0	0	0	7	9	4	4	13	21	0	2	1	2	1	1	0	0	0	0	4.90672	1	1
ZNF324B	ZNF324B	19	1.098	1.31575e-06	3.18654e-06	1.11169e-05	0	0	0	0	1	0	0	0	0	0	0	0	0	0	0	0	0	0	0	0	0	0	0	0	0	1	3	2	14	20	2	0	4	2	5	9	0	0	0	0	1.07233	4.57242	1
KHSRP	KHSRP	19	0.078	3.1083e-06	8.67253e-06	1.34181e-05	0	0	0	0	0	0	0	0	1	0	0	0	0	0	0	0	0	0	0	0	1	0	0	0	1	0	4	7	38	39	0	0	5	4	3	4	0	0	0	0	1.0126	4.62784	1.04628
MAFB	MAFB	20	0.397	5.45916e-07	3.71311e-07	1.57532e-06	0	0	0	0	0	0	1	0	0	0	0	0	0	0	0	0	0	0	0	0	0	0	0	0	0	0	0	0	0	0	0	0	0	0	0	0	0	0	0	0	4.90047	1	1
ZBTB14	ZBTB14	18	0.645	9.97211e-07	3.2618e-06	5.00997e-06	0	0	0	0	0	1	1	0	1	0	0	0	0	0	0	0	0	0	0	0	0	0	0	0	1	0	1	6	11	8	1	0	0	0	3	10	0	0	0	0	3.39719	1.42832	1.00966
GRASP	GRASP	12	0.387	1.44149e-06	3.44442e-06	9.4522e-06	0	0	0	0	0	0	0	0	0	0	0	0	0	0	0	0	0	0	0	0	0	0	0	0	2	1	11	5	46	48	0	0	0	0	3	0	0	0	0	0	1.14039	3.52371	1.2191
SPSB1	SPSB1	1	0.594	1.21151e-06	3.22074e-06	4.11132e-06	0	0	1	0	0	0	0	0	0	0	0	0	0	0	0	0	0	0	0	0	0	0	0	0	0	0	3	7	12	9	0	0	3	2	1	6	0	0	0	0	1	4.78472	1.02018
BAI1	ADGRB1	8	0.14	5.22114e-06	6.49895e-06	4.79934e-05	1	0	0	0	1	0	0	0	0	1	1	0	0	0	0	0	0	0	0	0	0	0	0	0	2	1	9	14	218	211	1	1	0	2	3	28	0	0	0	0	3.1225	1	1.5616
AP1B1	AP1B1	22	0.263	3.48567e-06	1.45457e-06	1.38483e-05	0	0	0	0	0	0	1	0	0	0	0	1	0	0	0	0	0	0	0	0	0	0	0	0	2	2	0	3	33	35	0	0	1	0	15	15	0	0	0	0	3.84075	1	1.26859
OGFOD3	OGFOD3	17	1.31	1.53162e-06	5.31609e-07	2.49567e-06	0	0	0	0	0	0	0	0	0	0	0	0	0	0	0	0	0	0	0	0	0	0	0	0	4	3	7	6	7	6	1	2	2	0	0	0	0	0	0	0	1	4.71111	1.03312
TBC1D32	TBC1D32	6	0.904	5.88829e-06	6.17825e-07	7.96554e-07	0	0	0	0	0	0	0	0	0	0	0	0	0	0	0	0	0	0	0	0	0	0	0	0	22	18	6	2	2	2	3	3	0	0	4	0	0	0	0	0	1.66685	2.54252	1.14676
GPR155	GPR155	2	0.974	3.62437e-06	6.90086e-07	7.57647e-07	0	0	0	0	0	0	0	1	0	0	0	0	0	0	0	0	0	0	0	0	0	0	0	0	9	6	5	1	5	7	1	3	1	0	3	4	0	0	0	0	1.034	4.59647	1.02234
MYH9	MYH9	22	0.088	9.04852e-06	1.07926e-05	3.08338e-05	0	0	0	0	2	0	0	0	1	0	1	0	0	0	0	0	0	1	0	0	0	0	0	0	3	0	27	24	154	160	0	0	5	5	24	46	0	0	0	0	1.05856	2.03603	2.25413
MEX3C	MEX3C	18	0.412	1.62013e-06	8.42375e-07	8.32826e-06	0	0	0	0	0	0	0	0	0	0	0	0	0	0	0	1	0	0	0	0	0	0	0	0	0	0	1	0	29	19	0	1	0	0	3	10	0	0	0	0	3.25692	1.19888	1.24379
STK24	STK24	13	0.58	2.20598e-06	2.86366e-07	6.08897e-06	0	0	0	0	2	1	0	0	0	0	0	1	0	0	0	0	0	0	0	0	0	0	0	0	2	1	1	1	18	9	0	0	0	0	3	2	0	0	0	0	1.07973	1	4.49689
LNX1	LNX1	4	0.708	3.31918e-06	6.8057e-10	1.76072e-09	0	0	0	0	0	0	0	0	0	0	0	0	0	0	0	0	0	0	0	0	0	0	0	0	14	16	0	0	0	0	5	0	0	0	0	0	0	0	0	0	4.84869	1	1
TPST2	TPST2	22	0.638	8.64535e-07	1.91981e-07	7.9348e-06	0	0	0	0	1	0	1	0	0	0	0	0	0	0	0	0	0	0	0	0	0	0	1	0	0	0	0	0	30	27	1	0	0	0	5	3	0	0	0	0	3.22474	1	1.50306
PPP1R10	PPP1R10	6	0.154	6.11827e-06	2.53053e-06	9.75041e-06	0	0	0	0	2	0	0	0	0	0	0	0	0	0	0	0	0	0	0	0	0	0	1	0	0	0	1	2	22	14	0	0	0	0	5	4	0	0	0	0	1	1	4.84514
C2CD5	C2CD5	12	0.705	4.60558e-06	1.34729e-06	6.38077e-06	0	0	0	0	1	0	0	0	0	0	0	0	0	0	0	0	0	0	0	0	0	0	0	0	10	9	5	1	10	20	2	0	0	0	2	4	0	0	0	0	2.02538	2.39175	1
SPOP	SPOP	17	0.144	1.71084e-06	5.02462e-06	3.15794e-06	0	0	1	0	0	0	0	0	0	0	0	0	0	0	0	0	0	0	0	0	0	0	0	0	0	0	3	0	11	13	1	0	0	1	1	3	0	0	0	0	1.71008	2.82968	1
SORT1	SORT1	1	0.212	3.76356e-06	4.76126e-06	4.62652e-06	0	0	0	0	0	0	0	0	0	0	0	0	0	0	0	0	0	0	0	0	0	0	0	0	2	1	22	12	30	28	0	0	0	1	1	5	0	0	0	0	1	4.28636	1.12687
SYTL1	SYTL1	1	1.056	2.48704e-06	2.02782e-06	1.69761e-06	0	0	0	0	0	0	0	0	0	0	0	0	0	0	0	0	0	0	0	0	1	0	0	0	8	3	6	9	9	12	0	2	0	0	0	0	0	0	0	0	1	4.82671	1
NFATC1	NFATC1	18	0.447	2.73494e-06	2.39366e-06	6.26482e-06	0	0	0	0	0	0	0	0	0	0	0	0	0	0	0	0	0	0	0	0	1	0	0	0	0	1	10	8	36	44	0	0	0	2	1	6	0	0	0	0	1	4.82611	1
SRSF9	SRSF9	12	0.529	1.26687e-06	2.90968e-06	4.72931e-06	0	0	1	0	0	0	0	0	0	0	0	0	0	0	0	0	0	0	0	0	0	0	0	0	0	0	3	4	13	14	0	0	0	0	3	2	0	0	0	0	1	4.55034	1.05956
PITPNM2	PITPNM2	12	0.18	4.78347e-06	1.07856e-05	2.35682e-05	0	0	0	0	0	0	0	0	1	0	0	0	0	0	0	0	0	1	0	0	0	0	0	0	1	2	34	35	139	136	2	1	6	5	10	18	0	0	0	0	1.01993	1.74832	2.70329
PLEKHO1	PLEKHO1	1	0.481	1.89577e-06	6.8057e-10	1.76072e-09	1	0	0	0	0	0	0	0	0	0	0	0	0	0	0	0	0	0	0	0	0	0	0	0	0	0	0	0	0	0	1	0	0	0	0	0	0	0	0	0	4.81914	1	1
CACNB3	CACNB3	12	0.644	2.44969e-06	6.8057e-10	9.48483e-06	0	0	0	0	0	0	0	0	0	0	0	0	0	0	0	0	0	0	0	0	0	0	0	0	2	1	0	0	68	56	2	0	0	0	17	21	0	0	0	0	2.14015	1	2.25129
INSR	INSR	19	0.453	6.99011e-06	5.70827e-06	2.31555e-05	0	0	0	0	1	0	0	0	0	0	0	0	0	0	0	0	0	1	0	0	0	0	0	0	4	3	14	19	120	100	3	3	1	4	15	18	0	0	0	0	1.16714	1	4.11699
GLRA1	GLRA1	5	0.762	2.12474e-06	3.24918e-06	2.69991e-06	0	0	1	0	0	0	0	0	0	0	0	0	0	0	0	0	0	0	0	0	0	0	0	0	2	4	12	11	6	7	2	2	1	2	1	4	0	0	0	0	1.08182	4.43969	1
PRPF19	PRPF19	11	0.106	2.14802e-06	4.81239e-06	7.39719e-06	0	0	0	0	0	0	0	0	2	1	0	0	0	0	0	0	0	0	0	0	0	0	0	0	0	0	9	9	20	34	0	0	1	1	7	11	0	0	0	0	1	4.80152	1
NELL2	NELL2	12	0.249	4.78146e-06	6.8057e-10	1.76072e-09	0	0	0	0	0	0	0	0	0	0	0	0	0	0	0	0	0	0	1	0	0	0	0	0	0	0	0	0	0	0	1	1	0	0	0	0	0	0	0	0	4.80122	1	1
SMARCB1	SMARCB1	22	0.22	2.19777e-06	5.06087e-06	5.41329e-06	0	0	0	0	0	0	0	0	0	0	0	0	0	0	0	0	0	0	0	0	0	0	0	0	0	1	2	1	4	7	0	0	3	0	2	3	0	0	0	0	1	4.79747	1
AAAS	AAAS	12	0.988	3.75971e-06	6.8057e-10	1.76072e-09	0	0	0	0	0	0	2	0	0	0	0	0	0	0	0	0	0	0	0	0	0	0	0	0	16	19	0	0	0	0	3	4	0	0	0	0	0	0	0	0	4.788	1	1
ZC3H11A	ZC3H11A	1	0.186	4.02804e-06	1.6566e-06	2.01959e-06	1	0	0	0	0	0	0	1	0	0	0	0	0	0	0	0	0	0	0	0	0	0	0	0	0	0	0	0	2	2	0	0	0	1	0	2	0	0	0	0	4.78685	1	1
ERGIC1	ERGIC1	5	0.473	1.34167e-06	2.51405e-07	6.09407e-06	0	0	0	0	0	0	0	0	0	0	0	0	0	0	0	0	0	1	0	0	0	0	0	0	3	3	0	1	20	18	2	0	1	2	5	6	0	0	0	0	2.55158	1	1.87328
TNFSF13B	TNFSF13B	13	0.244	9.73275e-07	1.22687e-06	1.61677e-06	0	0	0	0	0	0	0	0	0	0	0	0	0	0	0	0	0	0	0	0	0	0	0	0	0	0	1	0	12	16	0	0	3	1	0	4	0	0	0	0	1	4.76982	1
SATB1	SATB1	3	0.293	3.71314e-06	6.92657e-06	9.24543e-06	1	0	0	0	1	0	0	0	0	0	0	0	0	0	0	0	0	0	0	0	0	0	0	0	0	6	6	11	30	23	2	0	4	1	6	5	0	0	0	0	2.77792	1.24544	1.37867
YWHAH	YWHAH	22	0.504	1.06347e-06	2.80423e-06	2.97191e-06	0	0	0	0	0	0	0	0	0	0	0	0	0	0	0	0	0	0	0	0	0	0	0	0	0	0	11	6	5	6	0	0	1	0	1	4	0	0	0	0	1	4.76914	1
LRRFIP1	LRRFIP1	2	0.675	1.23942e-06	6.8057e-10	1.76072e-09	1	0	0	0	0	0	1	0	0	0	0	0	0	0	0	0	0	0	0	0	0	0	0	0	3	1	0	0	0	0	0	0	0	0	0	0	0	0	0	0	4.76823	1	1
AMOTL1	AMOTL1	11	0.471	4.56756e-06	6.8057e-10	1.50603e-07	1	0	0	0	0	0	0	0	0	0	0	0	0	0	0	0	0	0	0	0	0	0	0	0	3	3	0	0	0	0	2	0	0	0	0	0	0	0	0	0	4.75643	1	1
MAST1	MAST1	19	0.159	5.83955e-06	6.8057e-10	1.76072e-09	0	0	0	0	0	0	1	0	0	0	0	0	0	0	0	0	0	0	1	0	0	0	0	0	0	1	0	0	0	0	0	1	0	0	0	0	0	0	0	0	4.75534	1	1
DYRK2	DYRK2	12	0.17	1.56773e-06	6.8057e-10	9.21643e-06	0	0	0	0	0	0	0	0	0	0	0	0	0	0	0	0	0	0	0	0	0	0	0	0	1	0	0	0	40	35	2	0	0	0	6	10	0	0	0	0	3.62686	1	1.31071
ECT2	ECT2	3	0.657	4.76621e-06	6.8057e-10	8.8908e-06	1	0	0	0	0	0	0	0	0	0	0	0	0	0	0	0	0	0	0	0	0	0	0	0	5	2	0	0	51	38	2	2	0	0	9	7	0	0	0	0	2.45156	1	1.93878
SKIV2L	SKIV2L	6	0.877	6.12916e-06	6.8057e-10	1.91024e-05	0	0	0	0	1	0	0	0	0	0	0	0	0	0	0	0	0	0	0	0	0	0	0	0	22	16	0	0	140	109	0	1	0	0	4	5	0	0	0	0	1.29437	1	3.66985
SOX11	SOX11	2	0.44	7.76027e-07	7.29117e-06	1.13524e-05	0	0	1	0	0	0	0	0	1	0	0	0	0	0	0	0	0	0	0	0	0	0	0	1	0	1	3	2	28	33	0	0	0	0	2	0	0	0	0	0	1	4.74976	1
CXXC1	CXXC1	18	0.345	3.36106e-06	5.75458e-06	1.18372e-05	0	0	0	0	0	0	0	0	0	0	0	0	0	0	0	0	0	0	0	0	0	0	1	1	2	0	8	0	23	28	0	0	1	1	1	7	0	0	0	0	1.22627	3.86515	1
CSTF1	CSTF1	20	0.341	1.70063e-06	4.09956e-06	6.65923e-06	0	0	0	0	0	0	0	0	1	0	0	0	0	0	0	0	0	0	0	0	0	0	0	0	0	0	6	3	12	8	0	0	1	2	4	3	0	0	0	0	1	4.0924	1.15677
GTF3C1	GTF3C1	16	0.173	9.74364e-06	4.31518e-06	2.8226e-05	0	0	1	0	2	0	0	0	0	0	0	0	0	0	0	0	0	0	0	0	0	0	0	2	1	4	12	10	117	102	1	1	2	5	18	24	0	0	0	0	1	1.78105	2.65778
CYTH2	CYTH2	19	0.471	2.50429e-06	1.364e-06	6.04241e-06	0	0	0	0	0	0	0	0	0	0	0	0	0	0	0	0	0	0	0	0	0	0	0	0	1	1	2	1	7	11	1	0	4	3	1	3	0	0	0	0	1.33907	3.53288	1
DKFZP761J1410	PLPPR2	19	0.259	1.81687e-06	7.35414e-07	1.04794e-05	0	0	0	0	0	0	0	0	0	0	0	0	0	0	0	0	0	0	0	0	0	0	0	0	2	1	0	1	16	29	2	0	1	0	3	10	0	0	0	0	3.38379	1.39744	1
CELSR2	CELSR2	1	0.251	1.13289e-05	6.8057e-10	4.91466e-05	0	0	0	0	1	0	0	0	0	0	1	1	0	0	1	0	0	0	0	0	0	0	0	0	2	8	0	0	282	291	4	6	0	0	41	66	0	0	0	0	1	1	4.72848
CDC40	CDC40	6	0.31	2.65856e-06	7.32966e-07	6.76411e-06	0	0	0	0	0	0	1	0	0	0	0	0	0	0	0	0	0	0	0	0	0	0	0	0	0	0	2	3	15	15	0	0	0	0	1	6	0	0	0	0	4.71801	1	1
PAPSS1	PAPSS1	4	0.792	3.05821e-06	6.8057e-10	8.12538e-06	0	0	0	0	0	0	0	0	0	0	0	1	0	0	0	0	0	0	0	0	0	0	0	0	25	11	0	0	65	64	1	2	0	0	4	4	0	0	0	0	3.22106	1	1.46389
STXBP5L	STXBP5L	3	0.261	5.94625e-06	6.8057e-10	1.76072e-09	0	0	0	0	0	0	0	0	0	0	0	0	0	0	0	0	0	0	1	0	0	0	0	0	2	0	0	0	0	0	0	0	0	0	0	0	1	0	0	0	4.71478	1	1
HOXB6	HOXB6	17	1.258	6.94589e-07	2.17786e-06	2.07578e-06	0	0	0	0	1	0	0	0	0	0	0	0	0	0	0	0	0	0	0	0	0	0	0	0	2	1	9	6	10	9	0	1	1	0	0	1	0	0	0	0	1	3.21138	1.46806
CDC23	CDC23	5	0.289	2.93644e-06	1.75149e-06	7.38459e-06	0	0	0	0	2	0	0	0	0	0	0	0	0	0	0	0	0	0	0	0	0	0	0	0	1	1	1	2	16	16	0	1	0	1	6	6	0	0	0	0	1	1	4.71288
CCND1	CCND1	11	0.41	8.26596e-07	4.13658e-07	6.95711e-06	0	0	0	0	0	0	0	0	0	0	0	0	0	0	0	0	0	0	1	0	0	0	0	0	0	0	0	0	12	15	0	0	0	0	0	3	0	0	0	0	4.70724	1	1
BCAT1	BCAT1	12	1.022	1.82357e-06	6.8057e-10	1.76072e-09	0	0	0	0	0	0	2	1	0	0	0	0	0	0	0	0	0	0	0	0	0	0	0	0	5	10	0	0	0	0	1	2	0	0	0	0	0	0	0	0	4.70722	1	1
NOP14	NOP14	4	0.58	4.2014e-06	6.8057e-10	1.76072e-09	0	0	0	0	0	0	0	0	0	0	0	0	0	0	0	0	0	0	0	0	0	0	0	0	4	5	0	0	0	0	5	1	0	0	0	0	0	0	0	0	4.70633	1	1
GJD3	GJD3	17	1.903	3.35167e-07	6.00924e-06	8.95624e-06	0	0	0	0	0	0	0	0	0	0	0	0	0	0	0	0	0	0	0	0	0	0	0	0	0	0	29	22	19	27	0	0	0	0	0	2	0	0	0	0	1	4.70156	1
PCDHGA3	PCDHGA3	5	0.898	2.45522e-06	6.8057e-10	1.19224e-05	0	0	0	0	0	0	0	0	0	0	0	0	0	0	0	0	0	0	0	0	0	0	0	0	20	12	0	0	116	94	1	2	0	0	3	2	0	0	0	0	1.59041	1	2.95518
KLC4	KLC4	6	0.533	2.99976e-06	6.8057e-10	6.43408e-06	0	0	0	0	0	0	0	0	0	0	0	0	0	0	0	0	0	1	0	0	0	0	0	0	9	12	0	0	63	54	3	1	0	0	3	10	0	0	0	0	1.8803	1	2.49794
AVL9	AVL9	7	0.533	2.87129e-06	6.8057e-10	1.76072e-09	0	0	0	0	0	0	1	0	0	0	0	0	0	0	0	0	0	0	0	0	0	0	0	0	4	3	0	0	0	0	2	1	0	0	0	0	0	0	0	0	4.69586	1	1
LPHN1	ADGRL1	19	0.187	6.88693e-06	6.73157e-06	2.77343e-05	0	0	1	0	1	0	0	0	0	0	0	1	0	0	0	0	0	0	0	0	0	0	0	0	3	0	18	19	126	141	1	0	4	4	11	23	0	0	0	0	1.54347	2.66075	1.14326
PLCH1	PLCH1	3	0.338	7.54906e-06	6.8057e-10	1.68566e-05	0	0	0	0	1	1	1	0	0	0	0	0	0	0	0	0	0	0	0	0	0	0	1	0	3	1	0	0	84	76	2	2	0	0	12	13	0	0	0	0	2.44753	1	1.9182
RRAGA	RRAGA	9	0.713	6.69414e-07	4.16021e-06	5.28054e-06	0	0	0	0	0	0	0	0	0	0	0	0	0	0	0	0	0	0	0	0	0	0	0	0	4	0	0	1	25	13	0	1	5	3	1	8	0	0	0	0	1.23458	2.96965	1.27829
GPR116	ADGRF5	6	0.4	4.29654e-06	6.8057e-10	1.56092e-06	0	0	0	0	0	0	0	0	0	0	0	0	0	0	0	0	0	0	0	0	0	0	0	0	4	2	0	0	1	2	4	2	0	0	4	0	0	0	0	0	4.25253	1	1.10162
CTNND1	CTNND1	11	0.185	4.64444e-06	6.8057e-10	1.44506e-05	0	0	0	0	0	1	1	0	0	0	0	0	0	0	0	0	0	0	0	0	0	0	0	0	0	0	0	0	113	131	0	0	0	0	3	9	0	0	0	0	4.35004	1	1.07597
NDNF	NDNF	4	0.512	1.37663e-06	6.8057e-10	1.76072e-09	0	0	0	0	0	0	1	0	0	0	0	0	0	0	0	0	0	0	0	0	0	0	0	0	0	0	0	0	0	0	1	0	0	0	0	0	0	0	0	0	4.67793	1	1
KIAA0195	TMEM94	17	0.641	6.38008e-06	6.8057e-10	2.0074e-05	0	0	0	0	2	0	0	0	0	0	1	0	0	0	0	0	0	0	0	0	0	0	0	0	7	6	0	0	100	87	5	6	0	0	12	30	0	0	0	0	1.62103	1	2.88567
STT3A	STT3A	11	0.488	4.3009e-06	3.21886e-06	9.9868e-06	0	0	0	0	1	0	0	0	0	0	1	0	0	0	0	0	0	0	0	0	0	0	0	0	2	1	5	6	29	26	0	0	5	3	10	11	0	0	0	0	1	3.56568	1.30765
ST18	ST18	8	0.284	4.70759e-06	6.8057e-10	1.76072e-09	0	0	0	0	0	0	0	0	0	0	0	0	0	0	0	0	0	0	0	0	0	0	0	0	7	3	0	0	0	0	2	0	0	0	0	0	0	0	0	0	4.6506	1	1
PHRF1	PHRF1	11	0.384	6.55779e-06	6.8057e-10	1.76072e-09	0	0	0	0	0	0	0	0	0	0	0	0	0	0	0	0	0	0	0	0	0	0	0	0	36	29	0	0	0	0	0	0	0	0	0	0	0	0	0	0	4.64424	1	1
MCM6	MCM6	2	0.309	4.13038e-06	6.8057e-10	2.19053e-07	0	0	0	0	0	0	0	0	0	0	0	0	0	0	0	0	0	0	1	0	0	0	0	0	1	2	0	0	2	1	1	0	0	0	0	0	0	0	0	0	4.50146	1	1.03152
VGLL2	VGLL2	6	0.57	5.98411e-07	6.8057e-10	4.7124e-06	1	0	0	0	0	0	0	0	0	0	0	0	0	0	0	0	0	0	0	0	0	0	0	0	1	1	0	0	39	25	0	0	0	0	3	4	0	0	0	0	2.77883	1	1.67029
HMBS	HMBS	11	0.343	2.09861e-06	6.8057e-10	5.12288e-06	0	0	0	0	1	0	0	0	0	0	0	0	0	0	0	0	0	0	0	0	0	0	0	0	0	0	0	0	64	34	1	0	0	0	2	7	0	0	0	0	1.5902	1	2.91338
GRAMD1B	GRAMD1B	11	0.245	3.63609e-06	4.03484e-06	7.94054e-06	0	0	0	0	0	0	0	0	0	0	2	0	0	0	0	0	0	0	0	0	1	0	0	0	0	0	4	7	27	28	0	1	1	3	5	8	0	0	0	0	1	1.09943	4.20791
CARD10	CARD10	22	0.449	4.33406e-06	3.76573e-06	9.05105e-06	0	0	0	0	0	0	0	0	0	0	0	0	0	0	0	0	0	0	0	0	0	0	0	0	3	8	12	5	24	18	0	0	1	1	0	2	0	0	0	0	1	4.17547	1.10773
MPRIP	MPRIP	17	0.302	4.68799e-06	3.09943e-06	1.109e-05	0	0	0	0	0	0	0	0	0	0	0	0	0	0	0	0	0	0	1	0	0	0	0	0	0	0	1	2	8	6	0	0	1	5	1	5	0	0	0	0	4.62117	1	1
HIST2H2AB	H2AC21	1	0.976	2.12809e-07	1.76935e-06	2.99487e-06	0	0	0	0	0	0	0	0	0	0	0	0	0	0	0	0	0	0	0	0	0	0	0	0	3	0	1	1	1	3	0	0	4	2	1	2	0	0	0	0	1.08519	4.25341	1
ABCF3	ABCF3	3	0.573	3.58802e-06	6.8057e-10	4.57595e-06	0	0	0	0	0	0	1	0	0	0	1	0	0	0	0	0	0	0	0	0	0	0	0	0	4	4	0	0	27	24	5	6	0	0	2	5	0	0	0	0	3.35002	1	1.37685
NLRP4	NLRP4	19	0.776	2.95922e-06	6.8057e-10	1.76072e-09	0	0	0	0	0	0	0	0	0	0	0	0	0	0	0	0	0	0	0	0	0	0	0	0	30	21	0	0	0	0	4	4	0	0	0	0	0	0	0	0	4.61243	1	1
COL15A1	COL15A1	9	0.504	6.23502e-06	6.8057e-10	1.76072e-09	1	0	0	0	0	0	0	0	0	0	0	0	0	0	0	0	0	0	0	0	0	0	0	0	16	18	0	0	0	0	4	2	0	0	0	0	0	0	0	0	4.60533	1	1
TERT	TERT	5	0.293	3.88901e-06	1.4115e-05	2.86093e-05	0	0	0	0	2	0	0	0	0	0	1	1	0	1	0	0	0	0	0	0	0	0	0	0	0	0	13	14	86	97	0	0	0	0	8	9	0	0	0	0	1	4.24693	1.08347
HLF	HLF	17	0.313	6.84137e-07	1.43137e-06	4.3098e-06	0	0	0	0	0	0	0	0	0	0	0	0	0	0	0	0	0	0	0	0	0	0	0	0	0	0	7	4	15	14	0	0	2	1	2	0	0	0	0	0	1	4.1031	1.12133
PGM2L1	PGM2L1	11	0.498	2.50848e-06	1.26741e-07	8.66796e-06	0	0	0	0	0	0	0	0	0	0	0	0	0	0	0	0	0	0	1	0	0	0	0	0	2	3	1	0	30	44	1	0	0	0	4	2	0	0	0	0	3.65856	1.25687	1
PTGFRN	PTGFRN	1	0.538	3.68785e-06	6.8057e-10	1.59052e-05	0	0	0	0	2	0	0	0	0	0	0	0	0	0	0	0	0	0	0	0	0	0	0	0	4	4	0	0	82	66	0	8	0	0	13	19	0	0	0	0	1	1	4.59154
KISS1R	KISS1R	19	0.648	6.96783e-07	4.555e-06	9.59565e-06	0	0	0	0	1	0	0	0	0	0	0	0	0	0	0	0	0	0	0	0	0	0	0	0	8	5	37	34	28	20	0	0	0	0	0	0	0	0	0	0	1.57102	2.34359	1.24648
GOLGA3	GOLGA3	12	0.38	6.66164e-06	6.8057e-10	1.76072e-09	0	0	0	0	0	0	0	0	0	0	0	0	0	0	0	0	0	0	0	0	0	0	0	0	26	18	0	0	0	0	0	0	0	0	0	0	0	0	0	0	4.58572	1	1
NFIB	NFIB	9	0.225	2.91601e-06	4.6549e-06	4.31732e-06	1	0	0	0	0	0	0	0	0	0	0	0	0	0	0	0	0	0	0	0	0	0	0	0	1	1	9	9	32	45	0	0	0	1	1	2	1	0	0	0	4.58286	1	1
PRKCZ	PRKCZ	1	0.4	2.3445e-06	5.17513e-06	3.36131e-06	0	0	0	0	0	0	0	0	0	0	0	0	0	0	0	0	0	0	0	0	1	0	0	0	3	3	6	6	9	9	0	0	1	1	3	1	0	0	0	0	1	4.18478	1.09477
FAM98C	FAM98C	19	1.347	1.28725e-06	1.55387e-06	4.21014e-06	0	0	0	0	0	0	0	0	0	0	0	0	0	0	0	0	0	0	0	0	0	0	1	0	36	46	6	1	14	10	1	1	0	0	0	0	0	0	0	0	1	2.99033	1.53162
HCAR2	HCAR2	12	1.63	6.55394e-07	7.24079e-07	5.10592e-06	0	0	0	0	0	0	0	0	0	0	0	1	0	0	0	0	0	0	0	0	0	0	0	0	0	0	0	1	2	1	0	0	5	3	0	2	0	0	0	0	1	4.56851	1
SRRM1	SRRM1	1	0.146	6.87654e-06	1.91414e-06	2.96618e-07	0	0	0	0	0	0	1	0	0	0	0	0	0	0	0	0	0	0	0	0	0	0	0	0	2	0	1	1	0	1	0	0	1	0	0	0	0	0	0	0	2.9875	1.52787	1
ATP1A1	ATP1A1	1	0.121	4.51329e-06	1.23889e-05	1.03809e-05	1	0	1	0	0	0	0	0	0	0	0	0	0	0	0	0	0	0	0	0	0	0	0	0	0	0	17	10	28	28	1	1	3	8	5	7	0	0	0	0	4.20855	1	1.08109
COL6A6	COL6A6	3	1.013	8.73445e-06	6.8057e-10	1.76072e-09	1	0	0	0	0	0	0	0	0	0	0	0	0	0	0	0	0	0	0	0	0	0	0	0	139	142	0	0	0	0	13	4	0	0	0	0	0	0	0	0	4.54799	1	1
ZNF112	ZNF112	19	0.512	2.65655e-06	6.8057e-10	1.76072e-09	0	0	0	0	0	0	0	0	0	0	0	0	0	0	0	0	0	0	0	0	0	0	0	0	0	0	0	0	0	0	4	1	0	0	0	0	0	0	0	0	4.54692	1	1
FAM160B1	FAM160B1	10	0.25	3.84731e-06	6.8057e-10	1.94213e-06	1	0	0	0	0	0	0	0	0	0	0	0	0	0	0	0	0	0	0	0	0	0	0	0	2	1	0	0	7	4	0	0	0	0	0	3	0	0	0	0	4.39898	1	1.03343
LHX6	LHX6	9	0.326	1.4738e-06	7.77938e-06	3.95812e-06	0	0	0	0	0	0	1	0	0	0	0	0	0	0	0	0	0	0	0	0	0	0	0	0	1	2	16	14	16	12	0	0	1	1	0	2	0	0	0	0	4.14274	1	1.09716
ASF1A	ASF1A	6	0.485	8.0132e-07	7.0767e-07	2.35957e-06	0	0	0	0	0	0	1	0	0	0	0	0	0	0	0	0	0	0	0	0	0	0	0	0	1	0	0	2	3	3	0	0	1	0	0	1	0	0	0	0	4.05413	1.12087	1
CDC42BPA	CDC42BPA	1	0.283	8.56092e-06	7.53278e-07	7.70926e-06	0	0	0	0	0	0	0	0	0	0	0	1	0	0	0	0	0	0	0	0	0	0	0	0	7	4	0	1	20	20	3	0	0	1	2	3	0	0	0	0	4.42809	1	1.02617
METTL14	METTL14	4	0.607	2.90596e-06	5.66257e-07	5.54984e-06	0	0	0	0	1	0	0	0	0	0	0	0	0	0	0	0	0	0	0	0	0	0	1	0	5	2	0	3	12	9	2	0	0	0	1	1	0	0	0	0	2.93789	1	1.5459
MAP4K1	MAP4K1	19	0.295	4.67107e-06	7.77002e-06	6.1947e-06	0	0	0	0	1	0	0	0	0	0	0	1	0	0	0	0	0	0	0	0	0	0	0	0	1	1	20	9	28	34	0	0	4	6	0	5	0	0	0	0	1	4.53859	1
MTSS1L	MTSS2	16	0.309	3.10193e-06	2.66702e-06	3.29674e-06	1	0	0	0	0	0	0	0	0	0	1	0	0	0	0	0	0	0	0	0	0	0	0	0	0	0	3	1	30	35	0	1	0	0	0	1	0	0	0	0	2.54822	1.36469	1.30455
ATP9A	ATP9A	20	0.205	5.93017e-06	5.24749e-06	1.81852e-05	0	0	1	0	0	0	1	0	0	0	0	0	0	0	0	0	0	0	0	0	0	0	0	0	2	1	5	9	51	46	1	0	2	3	9	21	0	0	0	0	3.95314	1	1.14677
HRH2	HRH2	5	0.811	8.48337e-07	2.83946e-06	4.6004e-06	0	0	1	0	0	0	0	0	0	0	0	1	0	0	0	0	0	0	0	0	0	0	0	0	0	0	4	4	13	12	0	0	2	3	2	5	0	0	0	0	1	4.42009	1.02498
XRN1	XRN1	3	0.197	8.19192e-06	6.8057e-10	7.85159e-07	0	0	0	0	0	0	0	0	0	0	0	0	0	0	0	0	0	0	1	0	0	0	0	0	4	1	0	0	1	1	0	0	0	0	0	0	0	0	0	0	4.52591	1	1
BSDC1	BSDC1	1	0.584	1.75037e-06	6.8057e-10	2.91617e-07	1	0	0	0	0	0	0	0	0	0	0	0	0	0	0	0	0	0	1	0	0	0	0	0	0	2	0	0	1	0	0	0	0	0	0	0	0	0	0	0	4.41976	1	1.02398
PGAP1	PGAP1	2	0.6	4.08516e-06	6.8057e-10	2.90024e-07	0	0	0	0	0	0	0	0	0	0	0	0	0	0	0	0	0	0	0	0	0	0	0	0	11	8	0	0	1	0	4	2	0	0	0	0	0	0	0	0	4.41778	1	1.024
ENTPD2	ENTPD2	9	1.471	1.90967e-06	6.8057e-10	1.76072e-09	2	0	0	0	0	0	0	0	0	0	0	0	0	0	0	0	0	0	1	0	0	0	0	0	15	10	0	0	0	0	0	0	0	0	0	0	0	0	0	0	4.51955	1	1
CACNA2D3	CACNA2D3	3	0.337	6.15194e-06	6.8057e-10	5.50541e-06	2	0	0	0	0	0	0	0	0	0	0	0	0	0	0	0	0	0	0	0	0	0	0	0	1	4	0	0	14	17	0	1	0	0	5	7	0	0	0	0	4.49508	1	1.00538
ZFAND5	ZFAND5	9	0.451	8.81737e-07	8.37315e-07	1.44234e-06	1	0	0	0	0	0	0	0	0	0	1	1	0	0	0	0	0	0	0	0	0	0	0	0	0	0	0	0	0	0	0	0	1	1	1	1	0	0	0	0	3.91309	1.13625	1.01545
GABBR1	GABBR1	6	0.224	4.68062e-06	9.7565e-06	1.11963e-05	0	0	0	0	1	0	0	0	0	1	1	0	0	0	0	0	0	0	1	0	0	0	0	0	1	1	8	6	44	45	0	0	1	1	1	1	0	0	0	0	4.10163	1	1.0994
ZNF318	ZNF318	6	0.339	8.19963e-06	6.8057e-10	1.76072e-09	1	0	0	0	0	0	0	0	0	0	0	0	0	0	0	0	0	0	0	0	0	0	0	0	3	0	0	0	0	0	3	2	0	0	0	0	0	0	0	0	4.49874	1	1
TUBB8	TUBB8	10	1.533	3.45452e-07	6.69417e-06	6.17535e-06	0	0	0	0	2	0	0	0	0	0	0	0	0	0	0	0	0	0	0	0	0	0	0	0	0	0	0	1	1	1	0	2	2	1	0	0	0	0	0	0	1	1	4.49228
APP	APP	21	0.419	4.69553e-06	6.8057e-10	1.02058e-05	0	0	0	0	0	0	0	0	0	0	0	0	0	0	0	0	0	0	0	0	0	0	0	0	2	0	0	0	46	40	2	0	0	0	11	7	1	0	0	0	2.64169	1	1.69681
SMC5	SMC5	9	0.486	6.04173e-06	6.8057e-10	1.76072e-09	1	0	0	0	0	0	0	0	0	0	0	0	0	0	0	0	0	0	0	0	0	0	0	0	9	5	0	0	0	0	1	0	0	0	0	0	0	0	0	0	4.48221	1	1
PAPSS2	PAPSS2	10	0.955	2.90864e-06	6.8057e-10	4.69373e-07	2	0	0	0	0	0	0	0	0	0	0	0	0	0	0	0	0	0	0	0	0	0	0	0	6	6	0	0	6	4	0	3	0	0	1	2	0	0	0	0	4.14036	1	1.08147
DNAH10	DNAH10	12	0.687	1.93948e-05	6.8057e-10	1.76072e-09	0	0	0	0	0	0	0	0	0	0	0	0	0	0	0	0	0	0	0	0	0	0	0	0	75	59	0	0	0	0	6	13	0	0	0	0	0	0	0	0	4.47723	1	1
ACSS2	ACSS2	20	0.903	3.48551e-06	1.34092e-06	2.45354e-06	0	0	0	0	0	0	1	0	0	0	0	0	0	0	0	0	0	0	0	0	0	0	0	0	3	3	16	10	14	15	1	3	0	0	0	0	0	0	0	0	1	4.32003	1.03596
HNRNPA1	HNRNPA1	12	0.147	1.76193e-06	3.04957e-06	7.44722e-07	0	0	0	0	0	0	0	0	0	0	0	0	0	0	0	0	0	0	0	0	0	0	0	0	0	1	0	0	2	0	0	0	3	1	5	1	0	0	0	0	1	3.66239	1.22149
RAE1	RAE1	20	0.194	2.2904e-06	2.11218e-06	4.07949e-06	0	0	0	0	0	0	0	0	0	0	0	0	0	0	0	0	0	0	0	0	0	0	0	0	0	1	1	1	12	6	0	0	4	2	0	3	0	0	0	0	1	4.07449	1.09768
AGO1	AGO1	1	0.057	5.31511e-06	1.47529e-05	6.23352e-06	0	0	1	0	0	0	0	0	1	0	1	0	0	0	0	0	1	0	0	0	1	0	0	0	2	0	10	12	4	6	0	0	6	7	3	5	0	0	0	0	1.09162	4.09703	1
PPTC7	PPTC7	12	0.359	1.08121e-06	3.9914e-06	5.79357e-06	0	0	0	0	0	0	0	0	0	0	0	0	0	0	0	0	0	0	0	0	0	0	0	0	1	0	7	2	10	16	0	0	1	0	2	6	0	0	0	0	1.14623	3.90174	1
NSFL1C	NSFL1C	20	0.589	1.71369e-06	6.8057e-10	5.94051e-06	0	0	0	0	0	0	0	0	0	0	0	0	0	0	0	0	0	0	1	0	0	0	1	0	2	1	0	0	25	22	0	0	0	0	6	6	0	0	0	0	2.77138	1	1.61299
MYO1E	MYO1E	15	0.442	6.46734e-06	6.8057e-10	1.76072e-09	1	0	0	0	0	0	0	0	0	0	0	0	0	0	0	0	0	0	0	0	0	0	0	0	5	2	0	0	0	0	2	1	0	0	0	0	0	0	0	0	4.46401	1	1
DCTN1	DCTN1	2	0.364	6.84656e-06	6.35835e-08	9.4698e-06	0	0	0	0	2	0	0	0	0	0	0	0	0	0	0	0	0	0	0	0	0	0	0	0	6	8	0	0	35	33	0	0	0	0	9	12	0	0	0	0	1	1	4.46222
KLHL12	KLHL12	1	0.524	2.42808e-06	1.21863e-06	7.91965e-06	0	0	0	0	0	0	0	0	0	0	0	0	0	0	0	0	0	0	0	0	1	0	0	0	1	2	1	1	15	15	1	0	0	2	3	15	0	0	0	0	1.15627	3.85727	1
CACNA1B	CACNA1B	9	0.24	8.80882e-06	3.72732e-06	2.86573e-05	0	0	0	0	0	0	0	0	0	0	1	1	0	0	0	0	0	0	0	0	0	0	2	0	4	3	7	6	83	89	1	1	2	1	17	23	0	0	0	0	1	1.96581	2.26409
BAI2	ADGRB2	1	0.249	6.02163e-06	3.61973e-06	3.43569e-05	0	0	0	0	0	0	0	0	0	0	0	1	0	0	0	0	0	0	0	0	0	0	0	0	0	2	6	7	143	119	0	0	2	1	16	18	0	0	0	0	1	1.25657	3.53747
CAMK2B	CAMK2B	7	0.364	3.47529e-06	8.11158e-06	4.15325e-06	0	0	0	1	0	0	0	0	1	0	0	0	0	0	0	0	0	0	0	0	0	0	0	0	7	7	8	6	13	5	0	0	4	3	0	2	0	0	0	0	1	3.8033	1.16793
SUPV3L1	SUPV3L1	10	0.464	3.39489e-06	6.8057e-10	5.63029e-06	0	0	0	0	1	0	1	0	0	0	0	0	0	0	0	0	0	0	0	0	0	0	0	0	5	0	0	0	23	21	0	1	0	0	2	7	0	0	0	0	3.72046	1	1.19243
SMURF1	SMURF1	7	0.362	4.47778e-06	4.5496e-06	8.31426e-06	1	0	0	0	0	1	0	0	0	1	0	0	0	0	0	0	0	0	0	0	0	0	0	0	2	1	7	4	22	23	1	0	1	7	1	6	0	0	0	0	4.42241	1	1
CWC25	CWC25	17	0.789	2.16041e-06	9.7779e-07	2.71248e-06	0	0	0	0	0	0	0	0	0	0	0	0	0	0	0	0	0	0	0	0	0	0	0	0	7	0	10	5	12	12	1	0	0	1	4	6	0	0	0	0	2.11596	1.923	1.08583
ASCL2	ASCL2	11	1.819	4.10107e-08	4.81096e-06	5.69945e-06	0	0	0	0	0	0	0	0	0	0	0	0	0	0	0	0	0	0	0	0	1	0	0	0	0	0	8	10	31	24	0	0	0	0	0	0	0	0	0	0	1	3.37042	1.3101
PARP10	PARP10	8	0.74	3.25e-06	2.3408e-07	6.97844e-06	0	0	0	0	0	0	0	0	0	0	0	0	0	0	0	0	0	1	0	0	0	0	0	0	7	2	0	0	42	41	2	1	0	0	0	0	0	0	0	0	2.27258	1	1.93971
AGPAT4	AGPAT4	6	0.534	2.17231e-06	1.11142e-06	6.79086e-06	0	0	0	0	0	0	1	0	0	0	0	0	0	0	0	0	0	0	0	0	0	0	0	0	0	1	2	2	32	17	1	0	0	0	2	8	0	0	0	0	3.06389	1	1.43796
MCRS1	MCRS1	12	0.468	2.58536e-06	6.8057e-10	8.2179e-06	0	0	0	0	0	0	0	0	0	0	2	0	0	0	0	0	0	0	0	0	0	0	0	0	1	0	0	0	24	20	0	0	0	0	3	7	0	0	0	0	1.04627	1	4.20977
CTBP2	CTBP2	10	0.528	3.48383e-06	4.21591e-06	7.41162e-06	0	0	0	0	0	0	0	0	0	0	1	0	0	0	0	0	0	0	1	0	0	0	0	0	11	11	6	5	29	21	1	1	1	2	6	5	0	0	0	0	3.0493	1	1.44214
KLF13	KLF13	15	0.931	3.68433e-07	4.63701e-06	1.06233e-05	0	0	0	0	0	0	0	0	0	0	0	0	0	0	0	0	0	0	0	0	0	0	0	0	2	0	10	6	31	19	0	0	1	0	0	0	0	0	0	0	1.07725	2.99045	1.36424
TARDBP	TARDBP	1	0.275	1.54658e-06	3.29895e-06	4.93513e-06	0	0	0	0	0	0	0	0	0	0	0	0	0	0	0	0	0	0	0	0	0	0	0	0	0	1	4	0	18	10	0	0	1	0	3	1	0	0	0	0	1	3.27157	1.33866
RAP1GAP2	AC002316.1	17	0.316	3.41248e-06	6.8057e-10	9.68842e-06	0	0	0	0	0	0	0	0	0	0	0	0	0	0	0	0	0	0	0	0	0	0	1	0	2	1	0	0	29	32	4	2	0	0	3	4	0	0	0	0	3.96717	1	1.10332
ABCA3	ABCA3	16	0.501	5.96836e-06	6.8057e-10	1.87686e-06	0	0	0	0	0	0	0	0	0	0	1	0	1	0	0	0	0	0	0	0	0	0	0	0	4	5	0	0	6	4	2	2	0	0	0	0	0	0	0	0	2.89657	1	1.51007
SAMD11	SAMD11	1	1.28	2.18889e-06	6.8057e-10	1.76072e-09	0	0	0	0	0	0	2	1	0	0	0	0	0	0	0	0	0	0	0	0	0	0	0	0	4	6	0	0	0	0	0	1	0	0	0	0	0	0	0	0	4.37003	1	1
MED17	MED17	11	0.778	3.48316e-06	6.8057e-10	2.59631e-06	0	0	0	0	1	0	0	0	0	0	0	0	0	0	0	0	0	0	0	0	0	0	0	0	8	6	0	0	2	3	5	2	0	0	1	3	0	0	0	0	3.40699	1	1.28237
ETS2	ETS2	21	0.197	1.72793e-06	2.77531e-06	3.00664e-06	0	0	1	0	0	0	0	0	0	0	0	0	0	0	0	0	0	0	0	0	0	0	0	0	0	0	11	15	7	10	0	0	1	0	1	5	0	0	0	0	1	4.36443	1
INO80B	INO80B	2	0.469	1.06458e-06	2.12462e-07	9.34652e-06	0	0	0	0	0	0	0	0	0	0	0	0	0	0	0	0	0	1	0	0	0	0	0	0	0	2	0	0	42	30	1	0	1	0	0	5	0	0	0	1	1.09402	1.89313	2.10662
SETD3	SETD3	14	0.508	3.13275e-06	6.8057e-10	6.23807e-06	0	0	0	0	0	0	0	0	0	0	0	0	0	0	0	0	0	0	0	0	0	0	0	0	2	0	0	0	44	39	2	0	0	0	6	3	0	0	0	0	2.78072	1	1.56254
TANC1	TANC1	2	0.429	7.06012e-06	3.83442e-07	5.74814e-06	0	0	0	0	0	0	0	0	0	0	0	0	0	0	0	0	0	0	0	0	0	0	0	0	2	2	4	1	37	38	0	2	1	0	4	8	0	0	0	0	1	3.76872	1.15205
ERLIN1	ERLIN1	10	0.539	1.51792e-06	1.74828e-06	1.19121e-06	0	0	0	0	0	0	0	0	0	0	0	0	0	0	0	0	0	0	0	0	0	0	0	0	2	1	11	7	5	5	0	1	3	3	3	0	0	0	0	0	1	3.86501	1.12214
LCA5	LCA5	6	0.649	3.32353e-06	6.8057e-10	1.76072e-09	0	0	0	0	0	0	0	0	0	0	0	0	0	0	0	1	0	0	0	0	0	0	0	0	4	2	0	0	0	0	2	1	0	0	0	0	0	0	0	0	4.33259	1	1
C1orf112	C1orf112	1	0.73	3.2825e-06	6.8057e-10	1.76072e-09	0	0	0	0	0	0	0	0	0	0	0	0	0	0	0	0	0	0	0	0	0	0	0	0	24	11	0	0	0	0	2	3	0	0	0	0	0	0	0	0	4.33166	1	1
RMND5A	RMND5A	2	0.375	1.56881e-06	2.37553e-06	5.4469e-06	0	0	1	0	0	0	0	0	0	0	0	0	0	0	0	0	0	0	0	0	0	0	1	0	0	1	2	2	13	15	0	0	0	1	0	1	0	0	0	0	1	3.57511	1.21011
AURKB	AURKB	17	0.732	1.72625e-06	6.8057e-10	1.84879e-07	0	0	0	0	0	0	0	0	0	0	0	0	0	0	0	0	0	0	0	0	0	0	0	0	16	8	0	0	0	0	3	2	0	0	0	0	0	0	0	0	4.32341	1	1
SOGA1	SOGA1	20	0.194	5.35581e-06	7.43878e-06	2.64841e-05	0	0	0	0	0	0	0	0	1	0	0	0	0	0	0	0	0	0	0	0	0	0	0	0	3	4	57	55	113	124	0	0	0	0	5	14	0	0	0	0	1	4.23161	1.02022
RNF43	RNF43	17	0.374	3.45201e-06	6.8057e-10	9.1042e-06	0	0	0	0	1	0	0	0	0	0	0	0	0	0	0	0	0	0	0	0	0	0	0	0	5	5	0	0	77	65	2	0	0	0	6	12	0	0	0	0	2.30195	1	1.87329
SEMA6A	SEMA6A	5	0.221	3.27697e-06	6.8057e-10	7.12273e-07	0	0	0	0	0	0	0	0	0	0	0	0	0	0	0	0	0	0	0	0	0	0	0	0	1	1	0	0	1	2	3	0	0	0	0	1	0	0	0	0	4.31063	1	1
EIF4G1	EIF4G1	3	0.074	9.66542e-06	6.26652e-06	1.96506e-05	0	0	0	0	2	0	0	0	0	0	1	0	0	0	0	0	0	0	1	0	0	0	0	0	1	0	11	8	113	127	0	0	2	3	12	25	0	0	0	0	2.19906	1	1.96016
TBC1D10C	TBC1D10C	11	0.505	2.22691e-06	6.8057e-10	2.73925e-07	1	0	0	0	0	0	0	0	0	0	0	0	0	0	0	0	0	0	0	0	0	0	0	0	11	9	0	0	0	1	0	0	0	0	0	0	0	0	0	0	4.30719	1	1
DOK1	DOK1	2	0.636	1.36916e-06	3.65208e-07	3.06375e-06	0	0	0	0	0	0	1	0	0	0	0	0	0	0	0	0	0	0	0	0	0	0	0	0	0	0	1	0	8	6	0	1	1	0	4	5	0	0	0	0	1.66347	2.32113	1.11401
CPEB2	CPEB2	4	0.589	3.55887e-06	5.50368e-06	3.89068e-06	0	0	0	0	0	0	0	0	0	0	0	0	0	0	0	0	0	0	0	0	0	0	0	0	18	8	14	13	9	8	0	0	2	3	0	2	0	0	0	0	4.30117	1	1
MPO	MPO	17	1.145	2.7135e-06	6.8057e-10	1.26558e-05	0	0	0	0	2	0	0	0	0	0	1	0	0	0	0	0	0	0	0	0	0	0	1	0	14	21	0	0	95	94	0	4	0	0	10	20	0	0	0	0	1	1	4.29333
COG1	COG1	17	0.649	4.1865e-06	4.572e-07	3.70856e-06	0	0	0	0	0	0	0	0	0	0	0	0	0	0	0	0	0	0	0	0	0	0	0	0	7	4	2	0	10	8	2	0	0	0	0	0	0	0	0	0	2.60252	1.55863	1.0584
HAPLN2	HAPLN2	1	1.288	1.02939e-06	2.9836e-06	8.42146e-06	0	0	0	0	0	0	0	0	1	0	0	0	0	0	0	0	0	0	0	0	0	0	0	0	5	1	10	6	14	27	0	0	0	2	1	5	0	0	0	0	1	4.29131	1
HIST1H4J	H4C11	6	1.737	6.46751e-08	4.15844e-06	4.82158e-07	0	0	0	0	0	0	0	0	1	0	0	0	0	0	0	0	0	0	0	0	0	0	0	0	0	0	0	0	0	0	0	0	0	0	0	0	0	0	0	0	1	4.28384	1
SVIL	SVIL	10	0.358	1.07086e-05	6.8057e-10	3.51008e-06	1	0	0	0	0	0	0	0	0	0	0	0	0	0	0	0	0	0	0	0	0	0	0	0	8	5	0	0	14	9	4	3	0	0	4	7	0	0	0	0	3.59792	1	1.18952
CCT7	CCT7	2	0.301	2.19107e-06	6.8057e-10	5.09292e-06	0	0	0	0	0	0	1	0	0	0	0	0	0	0	0	0	0	0	0	0	0	0	1	0	0	1	0	0	23	32	0	0	0	0	2	5	0	0	0	0	3.72317	1	1.14762
PEX1	PEX1	7	0.664	6.37136e-06	6.8057e-10	1.76072e-09	0	0	0	0	0	0	0	0	0	0	0	0	0	0	0	0	0	0	0	0	0	0	0	0	39	39	0	0	0	0	4	2	0	0	0	0	0	0	0	0	4.26919	1	1
SHISA9	SHISA9	16	0.405	1.37785e-06	5.50817e-07	2.33689e-06	0	0	0	0	0	0	1	0	0	0	0	0	0	0	0	0	0	0	0	0	0	0	0	0	0	0	0	0	0	0	0	0	0	0	0	0	0	0	0	0	4.26776	1	1
DLGAP4	DLGAP4	20	0.287	3.02287e-06	6.8057e-10	2.00265e-05	0	0	0	0	0	0	1	0	0	0	0	1	0	0	0	0	0	0	0	0	0	0	0	0	0	0	0	0	88	80	0	1	0	0	12	25	0	0	0	0	2.70393	1	1.57667
AP3B1	AP3B1	5	0.344	5.22332e-06	3.1281e-07	4.01141e-06	0	0	0	0	0	0	0	0	0	0	0	0	0	0	0	0	0	0	0	0	0	0	1	0	5	0	0	1	12	11	1	0	0	0	3	1	0	0	0	0	2.75217	1	1.54883
WAPAL	WAPL	10	0.112	5.47976e-06	3.70547e-06	5.96485e-06	0	0	0	0	0	0	0	0	1	0	0	0	0	0	0	0	0	0	0	0	0	0	0	0	3	2	3	4	45	45	0	0	0	0	7	8	0	0	0	0	1	3.11577	1.36771
PEX5L	PEX5L	3	0.49	3.01316e-06	2.73852e-06	4.64041e-06	0	0	0	0	1	0	0	0	1	0	0	0	0	0	0	0	0	0	0	0	0	0	0	0	5	7	4	6	28	29	0	0	1	1	0	4	0	0	0	0	1	3.50783	1.2148
GIT1	GIT1	17	0.22	3.52437e-06	3.56366e-06	1.26832e-05	0	0	0	0	0	0	0	0	0	0	1	0	0	0	0	0	0	0	0	0	0	0	0	0	0	0	5	8	47	37	0	0	4	1	5	7	0	0	0	0	1	2.9332	1.45243
SYT3	SYT3	19	0.398	2.19257e-06	6.8057e-10	9.54692e-06	0	0	0	0	0	0	1	0	0	0	0	0	0	0	0	0	0	0	0	0	0	0	0	0	1	3	0	0	36	28	1	1	0	0	10	10	0	0	0	0	2.74102	1	1.55361
SHC3	SHC3	9	0.54	1.98102e-06	3.68546e-06	7.64525e-06	0	0	0	0	0	0	0	0	1	0	0	0	0	0	0	0	0	0	0	0	0	0	0	0	2	1	12	13	39	42	0	0	0	0	2	2	0	0	0	0	1.09432	3.52411	1.10383
EFR3B	EFR3B	2	0.436	3.91029e-06	1.31052e-06	5.56003e-06	0	0	0	0	0	0	0	0	0	0	0	0	0	0	0	0	0	0	1	0	0	0	0	0	5	3	0	0	0	0	0	0	0	0	0	0	0	0	0	0	4.24761	1	1
DESI2	DESI2	1	0.449	8.57114e-07	1.54817e-06	2.48703e-06	1	0	0	0	0	0	0	0	0	0	0	0	0	0	0	0	0	0	0	0	0	0	0	0	0	0	1	1	9	5	0	0	0	0	0	2	0	0	0	0	3.9507	1	1.07501
CNOT1	CNOT1	16	0.038	1.14068e-05	1.19772e-05	2.9017e-05	0	0	2	0	0	0	0	0	0	0	2	0	0	0	0	0	0	0	0	0	0	0	0	0	1	1	13	13	63	63	0	0	4	5	13	28	0	0	0	0	1	4.23718	1
ANPEP	ANPEP	15	0.638	4.34981e-06	6.8057e-10	2.33137e-06	0	0	0	0	0	0	0	0	0	0	0	0	0	0	0	0	0	0	0	0	0	0	0	0	20	13	0	0	4	5	2	1	0	0	0	2	0	0	0	0	4.23461	1	1
SEC61A2	SEC61A2	10	0.558	2.86626e-06	2.42293e-06	5.30965e-06	0	0	0	0	0	0	0	0	0	0	0	0	0	0	0	0	0	0	0	0	0	0	0	0	0	1	3	3	6	9	0	0	4	2	6	3	0	0	0	0	1	4.0219	1.05106
TMEM165	TMEM165	4	0.63	1.00678e-06	1.68095e-07	4.61186e-06	0	0	0	0	0	0	1	0	0	0	0	0	0	0	0	0	0	0	0	0	0	0	0	0	1	0	0	0	15	14	1	0	0	0	7	8	0	0	0	0	3.58083	1	1.17994
TECTA	TECTA	11	0.58	8.88939e-06	6.8057e-10	2.56879e-05	0	0	0	0	0	0	0	0	0	0	1	0	0	0	0	0	0	0	0	0	0	0	0	0	24	20	0	0	169	152	2	5	0	0	22	23	0	0	0	0	1	1	4.20869
CD248	CD248	11	0.575	1.50247e-06	6.8057e-10	1.10718e-05	0	0	0	0	0	1	0	0	0	0	0	1	0	0	0	0	0	0	1	0	0	0	0	0	0	0	0	0	68	58	0	0	0	0	2	5	0	0	0	0	2.65731	1	1.58328
SNRNP40	SNRNP40	1	0.398	1.52194e-06	8.72928e-08	5.24804e-06	0	0	0	0	0	0	0	0	0	0	0	0	0	0	0	0	0	0	0	0	0	0	0	0	5	1	1	0	21	13	0	1	1	0	2	1	0	0	0	0	1.33272	2.40342	1.31168
CELSR3	CELSR3	3	0.245	1.16059e-05	1.38529e-05	4.61143e-05	0	0	0	0	0	0	0	0	0	0	0	0	0	0	0	0	0	1	0	0	1	0	0	0	12	14	37	45	220	197	0	0	7	15	17	34	0	0	0	0	1	1	4.19956
FAM117A	FAM117A	17	0.861	2.26142e-06	6.8057e-10	7.35909e-06	0	0	0	0	1	0	0	0	0	0	2	0	0	0	0	0	0	0	0	0	0	0	1	0	1	6	0	0	31	40	0	1	0	0	1	7	0	0	0	0	1	1	4.1963
CADPS	CADPS	3	0.435	7.24404e-06	6.8057e-10	1.50529e-05	0	0	0	0	0	0	0	0	0	0	2	0	0	0	0	0	0	0	0	0	0	0	0	0	4	1	0	0	66	63	1	0	0	0	12	26	0	0	0	0	1.48525	1	2.82227
ANKRD52	ANKRD52	12	0.09	4.72852e-06	5.41796e-06	1.65009e-05	0	0	1	0	0	0	0	0	0	0	0	0	0	0	0	0	0	0	0	0	0	0	1	0	0	0	3	2	45	26	0	0	3	4	6	13	0	0	0	0	1	2.70802	1.54667
TBC1D10A	TBC1D10A	22	0.589	2.20832e-06	1.10912e-06	6.17762e-06	0	0	0	0	0	0	0	0	0	0	0	0	0	0	0	0	0	0	0	0	0	0	0	0	5	1	2	0	31	19	0	0	1	1	6	10	0	0	0	0	1.66058	1.66926	1.50937
ZSWIM4	ZSWIM4	19	0.575	3.02338e-06	1.53627e-08	9.5287e-06	0	0	0	0	0	0	1	0	0	0	0	0	0	0	0	0	0	0	1	0	0	0	0	0	10	10	0	1	29	26	0	1	0	0	0	4	0	0	0	0	4.04061	1	1.03433
DISP1	DISP1	1	0.596	4.45047e-06	6.8057e-10	1.76072e-09	0	0	0	0	0	0	1	0	0	0	0	0	0	0	0	0	0	0	0	0	0	0	0	0	0	0	0	0	0	0	4	3	0	0	0	0	0	0	0	0	4.1786	1	1
PLAG1	PLAG1	8	0.188	1.52862e-06	1.14639e-07	7.89572e-06	0	0	0	0	0	0	0	0	0	0	2	0	0	0	0	0	0	0	0	0	0	0	0	0	2	1	0	0	27	29	0	0	0	0	3	12	0	0	1	1	1.14468	1	3.64921
STRIP2	STRIP2	7	0.882	4.11598e-06	6.8057e-10	9.96443e-07	0	0	0	0	0	0	0	0	0	0	0	0	0	0	0	0	0	0	0	0	0	0	0	0	23	18	0	0	2	1	8	5	0	0	0	3	0	0	0	0	4.1756	1	1
RASGRP2	RASGRP2	11	0.447	2.59709e-06	6.8057e-10	7.29072e-06	0	0	0	0	0	0	0	0	0	0	1	0	0	0	0	0	0	0	0	0	0	0	0	0	4	3	0	0	45	20	1	0	0	0	8	4	0	0	0	0	1.66404	1	2.5064
SLC35E2	SLC35E2A	1	1.656	4.24529e-07	4.78746e-06	2.68019e-06	0	0	1	0	0	0	0	0	0	0	0	0	0	0	0	0	0	0	0	0	0	0	0	0	0	0	3	2	0	0	0	0	0	0	0	1	0	0	0	0	1	4.17004	1
MSL2	MSL2	3	0.481	1.62897e-06	6.8057e-10	7.22676e-06	1	0	0	0	0	0	0	0	0	0	1	0	0	0	0	0	0	0	0	0	0	0	0	0	1	0	0	0	15	9	1	1	0	0	3	13	1	0	0	0	4.05482	1	1.02773
SYT13	SYT13	11	0.459	1.36873e-06	6.8057e-10	4.84205e-07	0	0	0	0	0	0	0	0	0	0	0	0	0	0	0	0	0	0	0	0	0	0	0	0	3	0	0	0	0	0	2	0	0	0	0	0	0	0	0	0	4.16305	1	1
RPA2	RPA2	1	0.523	1.19376e-06	6.8057e-10	6.47133e-07	0	0	0	0	0	0	0	0	0	0	0	0	0	0	0	0	0	0	1	0	0	0	0	0	2	0	0	0	0	2	0	0	0	0	0	0	0	0	0	0	4.1545	1	1
POGK	POGK	1	0.369	2.40279e-06	5.55015e-06	7.2576e-06	0	0	0	2	0	0	0	0	0	0	1	0	0	0	0	0	0	0	1	0	0	0	0	0	2	4	17	13	37	36	0	0	4	8	7	3	0	0	0	0	2.95125	1	1.40675
DGKA	DGKA	12	0.367	4.59101e-06	2.30519e-07	1.03635e-05	1	0	0	0	0	0	0	0	0	0	0	0	0	0	0	0	0	0	0	0	0	0	0	0	3	3	1	0	44	41	0	0	0	0	9	16	0	0	0	0	2.58636	1.24829	1.28525
PTDSS1	PTDSS1	8	0.448	2.78703e-06	6.32766e-07	6.64883e-06	0	0	0	0	0	0	0	0	0	0	0	0	0	0	0	0	0	0	0	0	0	0	2	0	2	3	0	3	35	60	0	1	0	0	1	1	0	0	0	0	1	1	4.14674
KIAA1958	KIAA1958	9	0.643	1.61212e-06	6.8057e-10	1.74306e-06	1	0	0	0	0	0	0	0	0	0	0	0	0	0	0	0	0	0	0	0	0	0	1	0	0	0	0	0	3	6	1	0	0	0	1	2	0	0	0	0	2.89503	1	1.43168
AFF4	AFF4	5	0.138	5.17441e-06	3.24108e-06	1.14053e-05	0	0	0	0	0	1	1	0	0	0	0	0	0	0	0	0	0	0	0	0	0	0	0	0	1	0	8	6	54	61	0	0	2	3	9	14	0	0	0	0	3.59824	1.02739	1.12116
RHOC	RHOC	1	0.517	9.01686e-07	1.13672e-06	3.60844e-06	0	0	0	0	0	0	0	0	0	1	0	0	0	0	0	0	0	0	0	0	0	0	0	0	0	0	2	0	24	34	1	0	1	0	4	3	0	0	0	0	1.55102	2.67068	1
PAXIP1	PAXIP1	7	0.099	5.25179e-06	6.8057e-10	2.89531e-06	0	0	0	0	0	0	1	0	0	0	0	0	0	0	0	0	0	0	0	0	0	0	0	0	2	1	0	0	12	4	0	0	0	0	0	4	0	0	0	0	3.5973	1	1.151
SCAMP2	SCAMP2	15	0.548	1.66262e-06	6.8057e-10	3.12354e-06	1	0	0	0	0	0	0	0	0	0	0	0	0	0	0	0	0	0	0	0	0	0	0	0	2	1	0	0	16	9	1	1	0	0	2	4	0	0	0	0	3.35668	1	1.23344
KCNQ5	KCNQ5	6	0.306	4.91864e-06	9.9815e-06	7.0502e-06	0	0	0	0	1	0	0	0	1	0	0	0	0	0	0	0	0	0	1	0	0	0	0	0	2	1	17	16	22	30	0	0	1	3	3	2	0	0	0	0	4.13979	1	1
ZZZ3	AC118549.1	1	0.177	4.55851e-06	6.8057e-10	5.38437e-07	1	0	0	0	0	0	0	0	0	0	0	0	0	0	0	0	0	0	0	0	0	0	0	0	0	0	0	0	1	0	1	1	0	0	0	0	0	0	0	0	4.05469	1	1.02062
MINK1	MINK1	17	0.132	7.93749e-06	1.07391e-05	1.38716e-05	0	0	1	0	1	0	0	0	1	0	2	1	0	0	0	0	0	0	0	0	0	0	0	0	3	0	20	18	40	45	0	0	3	3	4	3	0	0	0	0	1.14335	1.6449	2.19945
IFNGR2	IFNGR2	21	0.339	1.13721e-06	6.8057e-10	2.78025e-06	0	0	0	0	0	0	0	0	0	0	0	0	0	0	0	0	0	0	0	0	0	0	0	0	2	0	0	0	20	42	2	0	0	0	6	10	0	0	0	0	4.13529	1	1
LPPR4	PLPPR4	1	0.369	2.97932e-06	6.5921e-07	1.17221e-05	0	0	0	0	1	0	1	0	0	0	0	0	0	0	0	0	0	0	0	0	0	0	0	0	0	2	3	1	20	24	0	0	1	1	7	5	0	0	0	0	2.27021	1.78918	1.01783
MAP2	MAP2	2	0.105	4.99703e-06	1.07301e-06	6.76412e-06	0	0	0	0	0	0	0	1	0	0	0	0	0	0	0	0	0	0	0	0	0	0	0	0	0	3	2	1	15	22	1	0	2	0	5	5	0	0	0	0	1	4.12534	1
KLHL26	KLHL26	19	0.978	1.69544e-06	1.73548e-07	1.75761e-05	0	0	0	0	0	0	0	0	0	0	0	0	0	0	0	0	0	0	0	0	0	0	0	0	0	1	1	0	63	48	1	0	1	0	4	6	0	0	0	0	1.07267	2.37757	1.61746
SLC5A7	SLC5A7	2	0.562	2.27515e-06	2.46172e-06	4.92349e-06	0	0	0	0	0	0	0	0	0	0	0	0	0	0	0	0	0	0	0	0	0	0	0	0	4	2	5	4	18	9	3	2	4	5	2	5	0	0	0	0	2.66108	1.24187	1.24718
FBXL2	FBXL2	3	0.52	3.63961e-06	1.98888e-06	5.63386e-06	0	0	0	0	0	0	1	0	0	0	0	0	0	0	0	0	0	0	0	0	0	0	0	0	2	1	1	3	14	25	2	1	1	1	1	9	0	0	0	0	4.11382	1	1
ACVR1	ACVR1	2	0.454	2.38687e-06	7.5202e-07	8.29691e-06	0	0	0	0	2	0	0	0	0	0	0	0	0	0	0	0	0	0	0	0	0	0	0	0	0	1	1	3	20	16	0	0	0	2	4	11	0	0	0	0	1	1	4.11339
HMGN2	HMGN2	1	0.459	4.54913e-07	6.8057e-10	1.76072e-09	0	0	0	0	0	0	0	0	0	0	0	0	0	0	0	0	0	0	1	0	0	0	0	0	0	0	0	0	0	0	0	0	0	0	0	0	0	0	0	0	4.11326	1	1
HNRNPA3	HNRNPA3	2	0.233	1.71135e-06	2.94261e-06	4.8557e-06	0	0	1	0	0	0	0	0	0	0	0	0	0	0	0	0	0	0	0	0	0	0	0	0	0	0	0	0	2	2	0	0	1	2	0	0	0	0	0	0	1	4.11247	1
MAP6	MAP6	11	0.568	9.85972e-07	9.70092e-06	4.50725e-06	0	0	0	0	0	0	0	0	0	0	0	0	0	0	0	0	0	0	0	0	0	0	0	0	0	0	23	16	12	11	1	1	0	0	0	0	0	0	0	0	1.16071	3.40872	1.03838
ASAP1	ASAP1	8	0.188	5.32617e-06	4.00042e-06	7.15302e-06	0	0	0	0	0	0	0	0	0	0	1	0	0	0	0	0	0	0	0	0	0	0	0	0	0	0	14	15	17	14	2	0	3	2	2	9	1	0	1	0	2.57301	1.58716	1.00514
FAT3	FAT3	11	0.253	1.24732e-05	9.18618e-07	1.26324e-05	0	0	0	0	1	0	0	0	0	0	0	0	0	0	0	1	0	0	0	0	0	0	0	0	3	4	0	1	38	35	3	2	0	0	4	9	0	0	0	0	3.68975	1	1.11072
ESRP2	ESRP2	16	0.715	3.41851e-06	6.8057e-10	9.81683e-06	0	0	0	0	0	0	0	0	0	0	0	0	0	0	0	0	0	0	0	0	0	0	0	0	5	5	0	0	100	72	2	3	0	0	13	11	0	0	0	0	1.05373	1	3.88301
SLC25A1	SLC25A1	22	0.649	1.47462e-06	2.28161e-06	5.56815e-06	1	0	0	0	0	0	0	0	0	0	0	0	0	0	0	0	0	0	0	0	0	0	0	0	1	1	3	4	6	8	2	0	0	0	0	6	0	0	0	0	4.08973	1	1
KLF16	KLF16	19	1.556	1.9167e-07	5.44167e-06	7.25171e-06	0	0	1	0	0	0	0	0	0	1	0	0	0	0	0	0	0	0	0	0	0	0	0	0	0	0	7	7	15	18	0	0	1	0	0	0	0	0	0	0	1	4.08956	1
KIAA1109	KIAA1109	4	0.41	2.2909e-05	2.35028e-06	5.48277e-05	0	0	0	0	0	0	1	0	0	0	1	1	0	0	0	0	0	0	0	0	0	0	0	0	21	14	7	3	175	156	5	8	1	2	33	51	0	0	0	0	1	1.48633	2.74812
RAPH1	RAPH1	2	0.223	4.16338e-06	6.8057e-10	9.03699e-07	0	0	0	0	0	0	1	0	0	0	0	0	0	0	0	0	0	0	0	0	0	0	0	0	0	1	0	0	6	8	1	0	0	0	0	0	0	0	0	0	4.08006	1	1
CDON	CDON	11	0.779	5.47742e-06	6.8057e-10	1.76072e-09	0	0	0	0	0	0	0	0	0	0	0	0	0	0	0	0	0	0	1	0	0	0	0	0	21	14	0	0	0	0	2	0	0	0	0	0	0	0	0	0	4.07986	1	1
ADAM23	ADAM23	2	0.275	4.37544e-06	4.3449e-07	1.36859e-05	1	0	0	0	0	1	0	0	0	0	0	0	0	0	0	0	0	0	0	0	0	0	0	0	1	2	1	0	49	40	1	1	0	0	5	9	0	0	0	0	2.39751	1.2316	1.37622
MYH1	MYH1	17	1.081	8.8368e-06	1.60526e-06	7.75033e-07	0	0	0	0	0	0	0	0	0	0	0	0	0	0	0	0	0	0	0	0	0	0	0	0	17	31	0	0	1	0	8	6	2	0	0	0	0	0	0	0	1.195	3.34147	1.01741
BRSK1	BRSK1	19	0.205	3.49974e-06	8.15821e-06	1.55265e-05	1	0	1	0	0	0	0	0	0	0	1	2	0	0	0	0	0	0	0	0	0	0	0	0	1	1	5	12	38	52	1	1	1	1	11	6	0	0	0	0	4.05849	1	1
NFKBIL1	NFKBIL1	6	0.58	2.94633e-06	2.18564e-07	8.32457e-06	1	0	0	0	0	0	0	0	0	0	0	0	0	0	0	0	0	0	0	0	0	0	0	0	5	2	1	0	23	20	0	0	0	0	0	2	0	0	0	0	3.10682	1.24928	1.04526
CAND2	CAND2	3	0.939	4.0999e-06	2.53008e-06	5.62491e-06	1	0	0	0	0	0	0	0	0	0	0	0	0	0	0	0	0	0	0	0	0	0	0	0	11	9	11	8	31	41	7	5	0	0	0	0	0	0	0	0	2.12075	1.91139	1
NRL	NRL	14	1.101	6.4794e-07	4.10804e-06	1.61342e-06	0	0	0	0	0	0	0	0	0	0	0	0	0	0	0	0	0	0	0	0	0	0	0	0	11	5	9	3	10	5	1	0	0	0	0	0	0	0	0	0	1.06307	3.28626	1.15984
PRKD1	PRKD1	14	0.622	3.63827e-06	6.8057e-10	1.047e-05	0	0	0	0	2	0	0	0	0	0	1	0	0	0	0	0	0	0	0	0	0	0	1	0	7	4	0	0	47	54	0	3	0	0	9	8	0	0	0	0	1	1	4.05161
MVP	MVP	16	0.726	3.05939e-06	6.8057e-10	1.64889e-05	0	0	0	0	0	0	0	0	0	0	1	0	0	0	1	0	0	0	0	0	0	0	0	0	13	16	0	0	112	113	2	0	0	0	9	17	0	0	0	0	1.60451	1	2.52444
TPCN1	TPCN1	12	0.436	4.52753e-06	2.94328e-06	9.00656e-06	0	0	0	1	0	0	0	0	0	0	0	0	0	0	0	0	0	0	0	0	0	0	0	0	1	1	5	4	54	46	0	0	4	3	3	12	0	0	0	0	1	3.01345	1.34305
ERBB3	ERBB3	12	0.685	7.61204e-06	6.8057e-10	1.36139e-05	0	0	0	0	1	0	0	0	0	0	0	0	0	0	0	0	0	0	0	0	0	0	0	0	17	5	0	0	81	93	3	6	0	0	22	24	0	0	0	0	2.58983	1	1.56143
IL27	IL27	16	0.505	8.4425e-07	6.8057e-10	2.67227e-06	1	0	0	0	0	0	0	0	0	0	0	0	0	0	0	0	0	0	0	0	0	0	0	0	0	0	0	0	12	4	0	0	0	0	2	5	0	0	0	0	3.31132	1	1.21956
ARF1	ARF1	1	0.402	5.30003e-07	3.50762e-06	1.6505e-06	0	0	0	0	1	0	0	0	0	0	1	0	0	0	0	0	0	0	0	0	0	0	0	0	0	0	2	0	2	6	0	0	1	0	2	1	0	0	0	0	1	1.98402	2.03447
RPE65	RPE65	1	1.111	2.58285e-06	6.8057e-10	1.76072e-09	2	0	0	0	0	0	0	0	0	0	0	0	0	0	0	0	0	0	0	0	0	0	0	0	12	15	0	0	0	0	0	3	0	0	0	0	0	0	0	0	4.0283	1	1
PPFIA2	PPFIA2	12	0.139	7.28022e-06	4.00477e-06	1.03955e-05	0	0	0	0	0	0	1	0	0	0	0	0	0	0	0	0	0	0	0	0	0	0	0	0	1	1	6	7	20	20	0	0	3	1	1	5	0	0	0	0	1.75413	2.29553	1
KCNJ2	KCNJ2	17	0.615	1.48506e-06	3.26826e-06	5.12165e-06	0	0	0	0	0	0	0	0	1	0	0	0	0	0	0	0	0	0	0	0	0	0	0	0	0	0	5	6	13	13	0	0	1	1	4	2	0	0	0	0	1	3.61766	1.11286
CRAMP1L	CRAMP1	16	0.417	3.81113e-06	4.71644e-06	1.04845e-05	0	0	0	0	0	0	0	0	0	0	0	0	0	0	0	0	0	0	0	0	0	0	0	0	0	1	8	6	22	22	0	0	2	0	6	3	0	0	0	0	1	3.53361	1.13908
NOA1	NOA1	4	0.738	2.31519e-06	5.52539e-07	6.48364e-06	0	0	0	0	0	0	0	0	0	0	0	0	0	0	0	0	0	0	0	0	0	0	0	0	10	8	1	5	44	42	3	0	0	0	0	0	0	0	0	0	3.17141	1	1.26673
GPS1	GPS1	17	0.231	2.22356e-06	8.48076e-08	9.93427e-06	0	0	0	0	2	0	0	0	0	0	0	0	0	0	0	0	0	0	0	0	0	0	0	0	2	1	0	0	36	35	0	0	0	0	1	2	0	0	0	0	1.09241	1	3.67544
UCHL1	UCHL1	4	0.212	1.18577e-06	7.76209e-08	3.85762e-06	0	0	0	0	0	0	0	0	0	0	0	0	0	0	0	0	0	0	0	0	0	0	0	0	0	0	0	0	18	14	2	0	0	0	5	6	0	0	0	0	3.21889	1	1.24719
YY1	YY1	14	0.198	1.37987e-06	4.1463e-06	1.03486e-05	0	0	0	0	0	0	0	0	1	0	0	0	0	0	0	0	0	0	0	0	0	0	0	0	0	0	1	2	39	24	0	0	0	0	1	1	0	0	0	0	1	2.64606	1.5162
SOD1	SOD1	21	0.978	4.59536e-07	1.40005e-06	2.19723e-06	0	0	0	0	0	0	0	0	0	0	0	0	0	0	0	0	0	0	0	0	0	0	0	0	2	4	3	2	3	9	0	0	2	0	0	0	0	0	0	0	1	4.01137	1
TMEM246	PGAP4	9	0.696	1.23372e-06	6.8057e-10	4.71097e-06	0	0	0	0	0	0	0	0	0	0	0	0	0	0	0	0	0	0	0	0	0	0	0	0	3	0	0	0	20	7	2	0	0	0	7	9	0	0	0	0	2.59021	1	1.54611
UHRF1BP1L	UHRF1BP1L	12	0.412	5.00222e-06	6.8057e-10	1.76072e-09	0	1	0	0	0	0	0	0	0	0	0	0	0	0	0	0	0	0	0	0	0	0	0	0	4	7	0	0	0	0	5	1	0	0	0	0	0	0	0	0	4.00221	1	1
KRT19	KRT19	17	0.734	1.71001e-06	6.8057e-10	8.83087e-06	0	0	0	0	0	0	0	0	0	0	0	0	0	0	0	0	0	0	0	0	0	0	0	0	2	1	0	0	65	65	3	0	0	0	8	9	0	0	0	0	2.64649	1	1.51175
GLI4	GLI4	8	0.984	8.70565e-07	6.8057e-10	7.72224e-06	0	0	0	0	2	0	0	0	0	0	0	0	0	0	0	0	0	0	0	0	0	0	0	0	5	2	0	0	35	42	0	1	0	0	1	3	0	0	0	0	1.03021	1	3.8771
CTTNBP2	CTTNBP2	7	0.602	5.57993e-06	6.8057e-10	1.76072e-09	1	0	0	0	0	0	0	0	0	0	0	0	0	0	0	0	0	0	0	0	0	0	0	0	12	5	0	0	0	0	1	1	0	0	0	0	0	0	0	0	3.99153	1	1
ZNF784	ZNF784	19	0.515	5.57641e-07	6.8057e-10	8.40042e-06	0	0	0	0	0	0	0	0	0	0	0	0	0	0	0	0	0	0	1	0	0	0	0	0	0	0	0	0	27	22	0	0	0	0	1	1	0	0	0	0	3.39981	1	1.17317
RAB11FIP1	RAB11FIP1	8	0.867	3.17664e-06	3.974e-06	1.41228e-06	0	0	0	0	0	0	0	0	0	0	0	0	0	0	0	0	0	0	0	0	0	0	0	0	5	0	22	17	3	3	0	0	0	0	0	0	0	0	0	0	1.26929	3.13723	1.00031
EHBP1L1	EHBP1L1	11	0.659	5.93268e-06	4.23591e-07	1.41031e-05	0	0	0	0	0	0	0	0	0	0	0	0	0	0	0	0	0	0	0	0	0	0	0	0	4	5	3	1	113	91	0	2	0	0	2	7	0	0	0	0	1	1.5825	2.51411
KLHL2	KLHL2	4	0.185	2.86023e-06	5.04924e-06	7.0299e-06	0	0	0	1	0	0	0	0	0	0	1	0	0	0	0	0	0	0	0	0	0	0	0	0	0	1	5	0	14	12	0	1	2	1	0	7	0	0	0	0	1	3.97602	1
TTK	TTK	6	0.463	4.12351e-06	6.8057e-10	1.76072e-09	1	0	0	0	0	0	0	0	0	0	0	0	0	0	0	0	0	0	0	0	0	0	0	0	7	4	0	0	0	0	0	0	0	0	0	0	0	0	0	0	3.97451	1	1
KCNV1	KCNV1	8	0.295	1.28933e-06	7.68442e-06	5.3547e-06	0	0	0	0	0	1	0	0	0	0	1	0	0	0	0	0	0	0	0	0	0	0	0	0	0	0	9	4	8	7	0	0	3	2	3	7	0	0	0	0	1	3.59411	1.10556
EEPD1	EEPD1	7	0.581	1.87516e-06	6.8057e-10	8.54603e-06	0	0	0	0	0	0	0	0	0	0	0	0	0	0	0	0	0	0	0	0	0	0	1	0	2	1	0	0	43	36	2	0	0	0	3	2	0	0	0	0	2.43133	1	1.62938
PLEKHG5	PLEKHG5	1	0.565	4.17293e-06	6.8057e-10	5.68025e-06	0	0	0	0	0	0	0	0	0	0	0	0	0	0	0	0	0	0	0	0	0	0	0	0	10	6	0	0	21	24	2	0	0	0	4	2	0	0	0	0	3.6375	1	1.08881
PKD1	PKD1	16	0.179	1.22518e-05	6.8057e-10	1.76072e-09	0	0	0	0	0	0	2	0	0	0	0	0	0	0	0	0	0	0	1	0	0	0	0	0	3	4	0	0	0	0	0	1	0	0	0	0	0	0	0	0	3.95556	1	1
MGEA5	OGA	10	0.316	3.84111e-06	2.10593e-06	9.65225e-06	0	0	0	0	0	0	1	0	0	0	0	0	0	0	0	0	0	0	0	0	0	0	0	0	0	0	5	3	11	18	0	0	1	5	3	8	0	0	0	0	3.95516	1	1
STK3	STK3	8	0.871	2.10966e-06	1.39396e-06	2.90435e-06	0	0	0	0	0	0	0	0	0	0	0	0	0	0	0	0	0	0	0	0	0	0	0	0	5	0	3	0	8	7	1	3	1	0	2	3	0	0	0	0	1.14731	3.2775	1.0509
SLC24A1	SLC24A1	15	0.569	3.31918e-06	6.8057e-10	5.5234e-07	0	0	0	0	0	0	1	0	0	0	0	0	0	0	0	0	0	0	0	0	0	0	0	0	5	6	0	0	1	2	2	0	0	0	0	0	0	0	0	0	3.95091	1	1
ABCF2	ABCF2	7	0.478	3.77093e-06	4.21202e-07	9.45353e-06	0	0	0	0	0	0	0	0	0	0	0	0	0	0	0	0	0	0	0	0	0	0	0	0	5	1	0	0	21	19	2	0	0	0	2	10	0	0	0	0	3.94474	1	1
DPP9	DPP9	19	0.298	4.17259e-06	3.32464e-06	1.27231e-05	0	0	0	0	0	0	0	0	0	0	0	0	0	0	0	0	0	0	0	0	0	0	0	0	4	1	1	5	74	51	0	0	3	1	5	8	0	0	0	0	1.47127	1.19636	2.23863
RPRD2	RPRD2	1	0.064	4.36086e-06	9.03536e-07	5.61294e-06	0	0	0	0	0	0	0	0	0	0	0	0	0	0	0	0	0	0	0	0	0	0	0	0	1	0	12	7	16	12	0	0	0	0	3	3	0	0	0	0	1	3.37433	1.1665
PLCG1	PLCG1	20	0.411	7.93749e-06	4.43652e-06	2.35011e-05	0	0	0	0	0	0	0	0	0	0	1	1	0	0	0	0	0	0	0	0	0	0	0	0	5	3	5	5	74	63	2	0	1	3	23	31	0	0	0	0	2.03555	1	1.93326
SENP7	SENP7	3	0.379	5.69416e-06	2.6529e-06	2.8321e-06	0	0	1	0	0	0	0	0	0	0	0	0	0	0	0	0	0	0	0	0	0	0	0	0	0	2	3	5	21	25	0	0	0	0	0	1	0	0	0	0	1	3.92965	1
UBAP2L	UBAP2L	1	0.103	5.43471e-06	3.7409e-06	2.23063e-06	1	0	0	0	0	0	0	0	0	0	0	0	0	0	0	0	0	0	0	0	0	0	0	0	0	0	8	3	4	2	0	0	1	4	0	1	0	0	0	0	3.85832	1	1.01688
SLC5A3	SLC5A3	21	0.324	1.6376e-06	6.8057e-10	8.9313e-06	0	0	0	0	0	1	0	0	0	0	0	1	0	0	0	0	0	0	0	0	0	0	0	0	0	0	0	0	35	26	2	0	0	0	6	12	0	0	0	0	2.90851	1	1.34893
COL11A2	COL11A2	6	0.306	1.21861e-05	6.8057e-10	1.38744e-05	0	0	0	0	0	0	0	0	0	0	2	0	0	0	0	0	0	0	0	0	0	0	0	0	9	3	0	0	67	68	1	2	0	0	12	5	0	0	0	0	1	1	3.92274
KPNA6	KPNA6	1	0.224	3.50293e-06	4.19622e-06	5.54328e-06	0	0	0	0	0	0	0	0	0	0	0	0	0	0	0	0	0	0	0	0	1	0	0	0	0	0	5	4	16	10	0	0	0	1	3	9	0	0	0	0	1	3.51027	1.11716
SCNN1D	SCNN1D	1	1.586	2.99406e-06	6.8057e-10	1.76072e-09	2	0	0	0	0	0	0	0	0	0	0	0	0	0	0	0	0	0	0	0	0	0	0	0	6	5	0	0	0	0	0	0	0	0	0	0	0	0	0	0	3.91739	1	1
AHR	AHR	7	0.154	3.98248e-06	6.8057e-10	1.76072e-09	0	0	0	0	0	0	1	0	0	0	0	0	0	0	0	0	0	0	0	0	0	0	0	0	1	1	0	0	0	0	0	0	0	0	0	0	0	0	0	0	3.91622	1	1
DENND3	DENND3	8	0.662	4.85314e-06	6.8057e-10	1.76925e-05	0	0	0	0	0	0	0	0	0	0	2	0	0	0	0	1	0	0	0	0	0	0	0	0	8	13	0	0	103	96	0	0	0	0	6	15	0	0	0	0	1.31099	1	2.98624
EPPK1	EPPK1	8	1.198	4.85448e-06	6.8057e-10	1.76072e-09	0	0	0	0	0	0	0	0	0	0	0	0	0	0	0	0	0	0	2	0	0	0	0	0	2	2	0	0	0	0	0	1	0	0	0	0	0	0	0	0	3.91451	1	1
ZNF317	ZNF317	19	0.759	2.17968e-06	6.8057e-10	1.09248e-05	0	1	0	0	0	1	0	0	0	0	0	0	0	0	0	0	0	0	0	0	0	0	0	0	2	1	0	0	95	62	1	1	0	0	5	6	0	0	0	0	1.16687	1	3.35442
JUP	JUP	17	0.587	2.39358e-06	6.8057e-10	6.49752e-06	1	0	0	0	0	0	0	0	0	0	0	0	0	0	0	0	0	1	0	0	0	0	0	0	3	2	0	0	32	37	0	0	0	0	2	4	0	0	0	0	2.44125	1	1.60313
RRP12	RRP12	10	0.575	6.28242e-06	2.49407e-07	3.01083e-06	0	0	0	0	0	0	0	0	0	0	0	0	0	0	0	0	0	0	0	0	0	0	0	1	8	5	1	0	18	16	2	0	0	0	3	1	0	0	0	0	2.57926	1.24674	1.21662
FLCN	FLCN	17	0.388	2.26092e-06	6.8057e-10	5.82393e-06	1	0	0	0	0	0	0	0	0	0	0	0	0	0	0	0	0	0	0	0	0	0	0	0	2	3	0	0	39	32	0	0	0	0	3	11	0	0	0	0	3.06043	1	1.27762
UBR2	UBR2	6	0.213	9.35219e-06	6.8057e-10	1.29314e-05	0	1	0	0	0	1	0	0	0	0	0	0	0	0	0	0	0	0	0	0	0	0	0	0	4	2	0	0	40	39	4	1	0	0	3	14	0	0	0	0	3.9075	1	1
RGS12	RGS12	4	0.606	5.17022e-06	6.8057e-10	1.76072e-09	0	0	0	0	0	0	0	0	0	0	0	0	0	0	0	0	0	0	0	0	0	0	0	0	12	6	0	0	0	0	3	2	0	0	0	0	0	0	0	0	3.90462	1	1
PTPRD	PTPRD	9	0.112	8.08874e-06	6.8057e-10	1.76072e-09	0	0	0	0	0	0	1	0	0	0	0	0	0	0	0	0	0	0	0	0	0	0	0	0	1	0	0	0	0	0	2	0	0	0	0	0	1	0	0	0	3.90164	1	1
ICA1L	ICA1L	2	0.64	2.10145e-06	6.8057e-10	1.76072e-09	0	0	0	0	0	0	0	0	0	0	0	0	0	0	0	0	0	0	0	0	0	0	0	0	26	13	0	0	0	0	0	2	0	0	0	0	0	0	0	0	3.89556	1	1
WDR43	WDR43	2	0.163	3.11165e-06	6.8057e-10	1.76072e-09	0	0	0	0	0	0	1	0	0	0	0	0	0	0	0	0	0	0	0	0	0	0	0	0	0	1	0	0	0	0	0	0	0	0	0	0	0	0	0	0	3.89233	1	1
ARGLU1	ARGLU1	13	0.394	2.57146e-06	3.78309e-06	7.23807e-06	0	0	0	0	0	1	0	0	0	0	1	0	0	0	0	1	0	0	0	0	0	0	0	0	0	1	14	15	10	11	0	0	0	0	3	0	0	0	0	0	3.7592	1	1.03487
PPM1B	PPM1B	2	0.662	1.93479e-06	6.8057e-10	1.76072e-09	0	0	0	0	0	0	0	0	0	0	0	0	0	0	0	0	0	0	0	0	0	0	0	0	3	0	0	0	0	0	3	0	0	0	0	0	0	0	0	0	3.89009	1	1
TENM3	TENM3	4	0.264	1.04744e-05	1.13129e-06	2.71996e-05	1	0	0	0	0	0	0	0	0	0	0	0	0	0	0	0	0	0	0	0	0	0	0	0	3	1	3	4	128	124	2	1	0	0	16	21	0	0	1	0	1.9336	1	2.01033
EXOC3	EXOC3	5	0.348	2.14718e-06	6.8057e-10	1.74651e-05	0	0	0	0	0	0	0	0	0	0	2	0	0	0	0	0	0	0	0	0	0	0	0	0	0	2	0	0	116	109	0	0	0	0	12	18	0	0	0	0	1	1	3.88585
R3HDM2	R3HDM2	12	0.176	4.22954e-06	3.50494e-06	7.1862e-06	0	0	0	0	0	0	0	0	0	0	0	0	0	0	0	0	0	0	1	0	0	0	0	0	0	1	12	9	27	31	0	0	0	2	3	12	0	0	0	0	3.87654	1	1
PARD6G	PARD6G	18	0.876	9.44281e-07	4.12946e-06	8.62696e-06	0	0	0	0	0	0	0	0	1	0	1	0	0	0	0	0	0	0	0	0	0	0	0	0	0	0	7	8	56	50	0	0	0	0	0	3	0	0	0	0	1	2.87526	1.34812
KIAA1199	CEMIP	15	0.728	6.21643e-06	6.8057e-10	1.94673e-05	0	0	0	0	2	0	0	0	0	0	0	0	0	0	0	0	0	0	0	0	0	0	0	0	6	6	0	0	120	128	1	4	0	0	26	24	0	0	0	0	1	1	3.87044
FAT1	FAT1	4	0.431	1.31878e-05	6.8057e-10	1.76072e-09	1	0	0	0	0	0	3	0	0	0	0	0	0	0	0	0	0	0	1	0	0	0	0	0	6	7	0	0	0	0	2	10	0	0	0	0	0	0	0	0	3.86914	1	1
ANO9	ANO9	11	0.911	3.89002e-06	6.8057e-10	2.08316e-06	2	0	0	0	0	0	0	0	0	0	0	0	0	0	0	0	0	0	0	0	0	0	0	0	6	10	0	0	11	10	0	1	0	0	1	4	0	0	0	0	3.73864	1	1.03405
RFX2	RFX2	19	0.213	2.76861e-06	3.09453e-06	1.02986e-05	0	0	0	0	1	0	0	0	0	0	0	0	0	0	0	0	0	0	0	0	0	0	0	0	0	3	9	5	45	50	0	0	1	0	4	5	0	0	0	0	1	3.58157	1.07917
PRMT2	PRMT2	21	0.653	1.96126e-06	1.40576e-07	8.07068e-06	0	0	0	0	0	0	0	0	0	0	0	0	0	0	0	0	0	0	1	0	0	0	0	0	2	0	2	1	37	27	0	1	0	0	5	2	0	0	0	0	1.92128	1.27213	1.5805
UBA6	UBA6	4	0.561	5.43152e-06	6.8057e-10	1.76072e-09	0	0	0	0	0	0	2	0	0	0	0	0	0	0	0	0	0	0	0	0	0	0	0	0	3	4	0	0	0	0	0	2	0	0	0	0	0	0	0	0	3.86115	1	1
FBN2	FBN2	5	0.205	1.31355e-05	6.8057e-10	7.64132e-06	0	0	0	0	0	0	1	0	0	0	0	0	0	0	0	0	0	0	0	0	0	0	0	0	9	3	0	0	21	32	2	0	0	0	5	3	0	0	0	0	3.85838	1	1
SP140	SP140	2	0.586	4.25366e-06	2.11883e-06	1.24424e-06	1	0	0	0	0	0	0	0	0	0	0	0	0	0	0	0	0	0	0	0	0	0	1	0	16	14	2	3	6	6	0	1	1	0	1	1	0	0	0	0	1.95924	1.20585	1.63254
LPGAT1	LPGAT1	1	0.302	1.84468e-06	4.46382e-07	4.05917e-06	0	0	0	0	0	0	1	0	0	0	0	0	0	0	0	0	0	0	0	0	0	0	0	0	1	0	0	0	6	1	0	1	0	0	0	2	0	0	0	0	3.66716	1	1.04975
ZNF804A	ZNF804A	2	0.479	3.51348e-06	6.8057e-10	1.76072e-09	0	0	0	0	0	0	0	0	0	0	0	0	0	0	0	0	0	0	0	0	0	0	0	0	0	0	0	0	0	0	3	0	0	0	0	0	0	0	0	0	3.84746	1	1
HCN4	HCN4	15	0.239	2.70764e-06	1.54131e-07	2.83608e-05	0	0	0	0	0	0	0	0	0	0	0	0	0	0	0	0	0	0	0	0	0	0	0	0	8	4	1	0	79	85	0	0	0	0	17	9	0	0	0	0	2.13338	1.2546	1.43734
SCAP	SCAP	3	0.522	4.60474e-06	3.85322e-06	8.36666e-06	0	0	0	0	0	0	1	0	0	0	0	0	0	0	0	0	0	0	0	0	0	0	0	0	4	1	11	14	50	49	0	0	1	2	3	3	0	0	0	0	2.9612	1	1.29913
BRWD1	BRWD1	21	0.222	1.04552e-05	2.5139e-06	2.19538e-05	1	0	0	0	0	0	0	0	0	0	0	0	0	0	0	0	0	0	0	0	0	0	0	0	12	9	3	2	84	67	2	2	1	1	10	14	0	0	1	0	1.72561	1.13343	1.96459
SLC25A11	SLC25A11	17	0.512	1.41866e-06	3.39893e-06	5.12635e-06	0	0	0	0	1	0	1	0	0	0	0	0	0	0	0	0	0	0	0	0	0	0	0	0	0	0	6	6	29	34	0	0	1	1	4	3	0	0	0	0	3.04779	1	1.25889
GRIK5	GRIK5	19	0.285	4.13574e-06	7.08108e-06	1.79459e-05	0	0	0	0	2	0	0	0	0	0	1	0	0	0	0	0	0	0	0	0	0	0	0	0	1	1	13	17	105	98	0	0	1	3	10	10	0	0	0	0	1	1	3.83401
PCSK5	PCSK5	9	0.499	8.61184e-06	9.35867e-06	7.31996e-06	1	0	0	0	0	0	1	1	0	0	0	0	0	0	0	0	0	0	0	0	0	0	0	0	7	3	42	44	50	44	0	0	4	9	8	8	0	0	0	0	2.36083	1	1.623
SHISA7	SHISA7	19	0.474	4.58112e-07	3.441e-07	1.45988e-06	1	0	0	0	0	0	0	0	0	0	0	0	0	0	0	0	0	0	0	0	0	0	0	0	0	0	0	0	0	0	0	0	0	0	0	0	0	0	0	0	3.82728	1	1
MAP3K5	MAP3K5	6	0.34	5.49266e-06	1.25643e-06	1.95198e-05	0	0	0	0	0	0	0	0	0	0	0	0	0	0	0	0	0	0	0	0	0	0	0	0	4	1	2	1	55	51	1	0	1	0	6	22	0	0	0	0	1.81494	2.10289	1.00183
PARN	PARN	16	0.519	3.22873e-06	6.8057e-10	1.76072e-09	1	0	0	0	0	0	0	0	0	0	0	0	0	0	0	0	0	0	0	0	0	0	0	0	2	2	0	0	0	0	2	1	0	0	0	0	0	0	0	0	3.82296	1	1
NID2	NID2	14	0.559	5.26888e-06	1.90781e-08	2.95869e-06	0	0	0	0	0	0	0	0	0	0	0	0	0	0	0	0	0	1	0	0	0	0	0	0	15	11	2	0	13	23	0	0	0	0	2	9	0	0	0	0	1.84138	1.60436	1.29397
MACROD1	MACROD1	11	0.499	1.17389e-06	1.68989e-06	2.63912e-06	0	0	0	0	0	0	0	0	0	0	0	0	0	0	0	0	0	0	0	0	0	0	0	0	2	5	7	1	4	4	0	0	0	0	1	0	0	0	0	0	1	3.75616	1.01652
IGF1R	IGF1R	15	0.306	5.74408e-06	1.13205e-06	2.34454e-05	0	0	0	0	0	0	0	0	0	0	0	0	0	0	0	0	0	0	0	0	0	0	0	0	2	3	2	0	62	73	2	0	1	0	10	18	0	0	0	0	1.42884	2.67225	1
INPP4B	INPP4B	4	0.353	5.15381e-06	6.8057e-10	2.02203e-07	1	0	0	0	0	0	0	0	0	0	0	0	0	0	0	0	0	0	0	0	0	0	0	0	1	0	0	0	0	1	1	0	0	0	0	0	1	0	0	0	3.81673	1	1
RYR1	RYR1	19	0.456	2.32859e-05	6.8057e-10	3.74308e-05	0	0	0	0	3	0	0	0	0	0	0	0	0	0	0	0	0	0	0	0	0	0	0	0	14	13	0	0	133	113	0	1	0	0	4	21	0	1	0	0	1	1	3.81379
ZBTB11	ZBTB11	3	0.541	5.07642e-06	4.77584e-06	4.50735e-06	0	0	0	0	0	0	0	0	0	0	0	0	1	0	0	0	0	0	0	0	0	0	1	0	1	1	6	8	15	12	0	0	0	0	0	0	0	0	0	0	2.5708	1	1.48329
TNFRSF8	TNFRSF8	1	0.359	3.19138e-06	6.8057e-10	4.64569e-07	0	0	0	0	0	0	0	0	0	0	0	0	0	0	0	0	0	0	1	0	0	0	0	0	1	1	0	0	1	4	0	0	0	0	0	0	0	0	0	0	3.81256	1	1
TSC22D2	TSC22D2	3	0.324	1.89459e-06	6.8057e-10	1.76072e-09	0	0	0	0	0	0	0	0	0	0	0	0	0	0	0	1	0	0	0	0	0	0	0	0	2	2	0	0	0	0	0	1	0	0	0	0	0	0	0	0	3.81126	1	1
SENP2	SENP2	3	0.305	3.77026e-06	6.8057e-10	5.95207e-06	0	0	0	0	0	0	1	0	0	0	0	0	0	0	0	0	0	0	0	0	0	0	1	0	0	0	0	0	25	19	0	1	0	0	4	3	0	0	0	0	2.27518	1	1.67496
CSF3R	CSF3R	1	0.766	3.24849e-06	6.8057e-10	4.40727e-06	0	0	0	0	0	0	0	0	0	0	0	0	0	0	0	0	0	1	0	0	0	0	0	0	4	7	0	0	13	21	5	1	0	0	2	4	0	0	0	0	2.71717	1	1.40143
BAZ1A	BAZ1A	14	0.176	8.14285e-06	2.06949e-06	1.70345e-05	0	0	0	0	1	0	1	0	0	0	1	0	0	0	0	0	0	0	0	0	0	0	0	0	2	1	4	5	97	80	0	0	1	0	3	21	0	0	0	0	1.85897	1.24524	1.64465
LOXL3	LOXL3	2	0.86	4.0808e-06	6.8057e-10	1.38406e-05	0	0	0	0	0	0	0	0	0	0	0	2	0	0	0	0	0	0	0	0	0	0	0	0	6	2	0	0	87	71	3	2	0	0	8	12	0	0	0	0	1.76794	1	2.15322
LRRC8A	LRRC8A	9	0.347	1.77399e-06	9.28449e-06	1.06472e-05	0	0	0	0	1	0	0	0	0	0	0	0	0	0	0	0	0	0	0	0	0	0	0	0	2	0	21	10	46	36	1	0	3	7	5	11	0	0	0	0	2.1752	1.23552	1.40848
E2F7	E2F7	12	0.285	3.01919e-06	6.8057e-10	5.49414e-06	0	0	0	0	0	0	0	0	0	0	1	0	0	0	0	0	0	0	0	0	0	0	1	0	3	0	0	0	24	24	1	0	0	0	3	5	0	0	0	0	2.40528	1	1.571
GNMT	GNMT	6	0.951	9.01787e-07	1.5991e-06	1.51814e-06	0	0	0	0	0	0	0	0	0	0	0	0	0	0	0	0	0	0	0	0	0	0	0	0	3	2	8	3	3	1	1	0	0	0	0	0	0	0	0	0	1.18353	3.05983	1.04219
ESPL1	ESPL1	12	0.159	9.20664e-06	4.11143e-06	1.86548e-05	0	0	0	0	0	0	0	0	0	0	0	0	0	0	0	0	0	0	0	0	0	0	0	0	30	17	8	9	54	58	0	2	1	0	13	13	0	0	0	0	3.00874	1.0154	1.23426
RIMBP2	RIMBP2	12	0.363	3.46842e-06	6.8057e-10	5.9812e-06	1	0	0	0	0	0	0	0	0	0	0	0	0	0	0	0	0	0	0	1	0	0	0	0	1	0	0	0	15	22	1	1	0	0	2	3	0	0	0	0	3.76632	1	1
ADCY4	ADCY4	14	0.892	4.61781e-06	6.8057e-10	1.40099e-05	0	0	0	0	1	0	0	0	0	0	0	0	0	0	0	0	0	0	0	0	0	0	0	0	29	24	0	0	100	78	1	6	0	0	18	16	0	0	0	0	1.06828	1	3.52426
ELOVL4	ELOVL4	6	0.407	1.67093e-06	6.8057e-10	3.14004e-06	0	0	0	0	0	0	0	0	0	0	0	0	0	0	0	0	0	0	0	0	0	0	0	0	4	0	0	0	4	5	2	1	0	0	0	2	0	0	0	0	3.75695	1	1
N4BP2L1	N4BP2L1	13	0.452	1.03342e-06	2.03224e-08	2.63715e-06	0	0	0	0	0	0	1	0	0	0	1	0	0	0	0	0	0	0	0	0	0	0	0	0	1	2	0	0	1	6	0	0	0	0	1	1	0	0	0	0	3.15226	1	1.19053
SLC12A4	SLC12A4	16	0.679	4.72082e-06	5.26823e-07	1.41215e-05	0	0	0	0	1	0	0	0	0	0	0	1	0	0	0	0	0	0	0	0	0	0	0	0	7	4	5	2	124	122	0	2	0	0	9	20	0	0	0	0	1	2.01812	1.85849
HHIP	HHIP	4	0.331	2.44935e-06	6.8057e-10	5.62547e-07	0	0	0	0	0	0	0	0	0	0	0	0	0	0	0	0	0	0	1	0	0	0	0	0	0	1	0	0	5	7	0	0	0	0	0	1	0	0	0	0	3.74808	1	1
EHD2	EHD2	19	0.538	1.31439e-06	6.8057e-10	9.86087e-06	0	0	0	0	2	0	0	0	0	0	0	0	0	0	0	0	0	0	0	0	0	0	0	0	1	2	0	0	30	35	0	0	0	0	7	4	0	0	0	0	1	1	3.74687
MTMR12	MTMR12	5	0.275	3.75853e-06	6.8057e-10	8.93157e-06	1	0	0	0	0	0	0	0	0	0	0	0	0	0	0	0	0	0	0	0	0	0	1	0	3	6	0	0	45	31	1	1	0	0	6	8	0	0	0	0	1.96478	1	1.90645
SLC12A7	SLC12A7	5	0.885	4.40759e-06	6.8057e-10	1.51705e-05	0	0	0	0	1	0	0	0	0	0	2	0	0	0	0	0	0	1	0	0	0	0	0	0	8	5	0	0	100	103	0	2	0	0	1	14	0	0	0	0	1	1	3.74355
TAF6L	TAF6L	11	0.516	2.23261e-06	3.29903e-07	1.20445e-05	0	0	0	0	0	0	0	0	0	0	0	0	0	0	0	0	0	0	1	0	0	0	0	0	0	0	1	0	31	40	0	0	0	0	1	12	0	0	0	0	3.01732	1.24013	1
DISP2	DISP2	15	0.405	3.65669e-06	6.8057e-10	2.04822e-05	0	0	0	0	0	0	0	0	0	0	0	0	0	0	0	0	0	0	0	0	0	0	0	0	5	6	0	0	139	123	1	1	0	0	21	20	0	1	0	0	1	1	3.74163
ARPC1A	ARPC1A	7	0.416	2.1713e-06	8.48432e-07	5.95196e-06	0	0	0	0	0	0	1	0	0	0	0	0	0	0	0	0	0	0	0	0	0	0	0	0	0	0	0	0	13	19	0	0	0	0	0	2	0	0	0	0	3.74025	1	1
ATP12A	ATP12A	13	0.815	3.84144e-06	6.8057e-10	1.19748e-06	1	0	0	0	0	0	0	0	0	0	0	0	0	0	0	0	0	0	0	0	0	0	0	0	77	78	0	0	11	9	1	1	0	0	1	1	0	0	0	0	3.34022	1	1.11925
KCNA1	KCNA1	12	0.73	1.06284e-06	8.87545e-06	5.52606e-06	0	0	0	0	0	0	0	0	0	0	0	0	0	0	0	0	0	0	0	0	0	0	0	0	1	1	4	6	35	31	0	0	7	4	1	6	0	0	0	0	1	3.1694	1.17875
MXRA8	MXRA8	1	1.13	1.40914e-06	4.62953e-06	7.83855e-06	0	0	0	0	0	0	0	0	0	0	0	0	0	0	0	0	0	0	0	0	0	0	0	0	0	3	15	9	23	21	0	0	0	0	0	0	0	0	0	0	1	3.43225	1.08829
CCNL1	CCNL1	3	0.264	3.07949e-06	3.67763e-06	6.84753e-06	0	0	0	0	0	0	0	0	0	0	0	0	0	0	0	0	0	0	0	0	0	0	0	0	4	0	5	4	26	27	0	0	2	1	1	6	0	0	0	0	1.93554	1.9274	1
CDC37	CDC37	19	0.37	1.68304e-06	1.56735e-07	8.06056e-06	0	0	0	0	0	0	0	0	0	0	0	0	0	0	0	0	0	0	0	0	0	0	0	0	1	0	0	1	55	30	1	0	0	1	4	10	0	0	0	0	1.77641	1	2.09739
SHROOM3	SHROOM3	4	0.352	6.48593e-06	6.8057e-10	1.72245e-05	0	0	0	0	0	0	0	0	0	0	0	0	0	0	0	0	0	1	0	0	0	0	0	0	4	4	0	0	176	180	2	1	0	0	8	16	0	0	0	0	1.13408	1	3.28463
SH3PXD2A	SH3PXD2A	10	0.296	4.06271e-06	6.8057e-10	1.91526e-05	0	0	0	0	0	0	0	0	0	0	0	0	0	0	0	0	0	0	0	0	0	0	0	0	1	3	0	0	163	138	0	1	0	0	14	29	0	0	0	0	1	1	3.72378
SPECC1	SPECC1	17	0.493	3.81347e-06	6.8057e-10	1.76072e-09	1	0	0	0	0	0	0	0	0	0	0	0	0	0	0	0	0	0	0	0	0	0	0	0	6	3	0	0	0	0	0	0	0	0	0	0	2	0	0	0	3.72346	1	1
ATOH7	ATOH7	10	1.661	2.39341e-07	1.73246e-06	2.98511e-06	0	0	0	0	0	0	0	0	0	0	0	0	0	0	0	0	0	0	0	0	0	0	0	0	3	2	6	2	31	17	0	0	0	0	0	0	0	0	0	0	1	2.36218	1.57571
SH3PXD2B	SH3PXD2B	5	0.488	3.32387e-06	1.01195e-06	2.91315e-06	1	0	0	0	0	0	0	0	0	0	0	0	0	0	0	0	0	0	0	0	0	0	0	0	30	32	0	0	15	6	2	3	0	1	1	2	0	0	0	0	2.9164	1	1.27624
AFF3	AFF3	2	0.221	5.21143e-06	1.48859e-06	9.20396e-06	0	0	0	0	1	0	1	0	0	0	0	0	0	0	0	0	0	0	0	0	0	0	0	0	1	1	1	2	37	24	0	0	0	2	5	16	0	0	0	0	2.75662	1	1.35016
SIGLEC5	SIGLEC5	19	0.981	1.64691e-06	3.25653e-06	1.72458e-06	0	0	1	0	0	0	0	0	0	0	1	0	0	0	0	0	0	0	0	0	0	0	0	0	1	3	1	1	0	0	0	1	0	1	0	0	0	0	0	0	1	2.56961	1.44595
LILRA6	LILRA6	19	0.911	1.49251e-06	2.39509e-06	4.63405e-06	0	0	0	0	0	0	0	0	0	0	0	0	0	0	0	0	0	0	0	0	0	0	0	0	0	0	0	0	0	0	1	0	2	0	0	0	0	0	0	0	1.16275	3.18845	1
INPPL1	INPPL1	11	0.423	4.85901e-06	1.30928e-06	1.1681e-05	0	0	0	0	0	1	0	0	0	0	0	0	0	0	0	0	0	0	0	0	0	0	0	0	5	3	1	2	44	41	3	2	0	0	14	13	0	0	0	0	2.37502	1	1.5594
SH3BP4	SH3BP4	2	0.572	2.55471e-06	6.8057e-10	3.2617e-06	0	0	0	0	0	0	0	0	0	0	0	0	1	0	0	0	0	0	0	0	0	0	0	0	5	11	0	0	13	7	2	0	0	0	2	0	0	0	0	0	2.95462	1	1.25241
DEF6	DEF6	6	0.259	3.11098e-06	3.14933e-06	1.24326e-05	0	0	0	0	0	0	0	0	0	0	0	0	0	0	0	0	0	0	0	0	0	0	0	0	4	2	6	10	39	26	2	1	0	2	6	7	0	0	0	0	2.42006	1	1.52859
PACSIN1	PACSIN1	6	0.197	1.73044e-06	3.59489e-06	4.91632e-06	0	0	0	0	0	0	0	0	0	0	0	0	0	0	0	0	0	0	0	0	0	0	0	0	2	0	4	5	23	16	1	1	2	0	3	7	0	0	0	0	1.51031	1.97181	1.24091
RBM12	RBM12	20	0.822	1.56554e-06	6.8057e-10	2.44699e-07	0	0	0	0	0	0	0	0	0	0	0	0	0	0	0	1	0	0	0	1	0	0	0	0	1	2	0	0	3	3	4	0	0	0	0	0	0	0	0	0	3.63274	1	1.01598
KIF16B	KIF16B	20	0.827	5.03907e-06	6.8057e-10	1.12425e-05	0	0	0	0	0	0	0	0	0	0	0	0	0	0	0	0	0	0	0	0	0	0	0	0	26	28	0	0	95	89	2	0	0	0	13	17	0	0	0	0	1.74424	1	2.11257
ANKRD12	ANKRD12	18	0.197	7.63884e-06	6.8057e-10	1.76072e-09	1	0	0	0	0	0	0	0	0	0	0	0	0	0	0	0	0	0	0	0	0	0	0	0	4	3	0	0	0	0	3	2	0	0	0	0	0	0	0	0	3.68229	1	1
PAPL	ACP7	19	0.957	2.70161e-06	6.8057e-10	6.87755e-06	0	0	0	0	1	0	0	0	0	0	0	0	0	0	0	0	0	0	0	0	0	0	0	0	30	14	0	0	50	44	2	0	0	0	6	8	0	0	0	0	2.30986	1	1.59372
EIF4A1	EIF4A1	17	0.117	2.61669e-06	5.74576e-06	3.97626e-06	0	0	1	0	0	0	0	0	0	0	0	0	0	0	0	0	0	0	0	0	0	0	0	0	0	0	0	0	1	0	0	0	2	2	1	0	0	0	0	0	1	3.68062	1
GOLGA6L10	GOLGA6L10	15	1.879	2.60379e-07	6.5608e-06	3.43024e-06	0	0	0	0	1	1	0	0	1	0	0	0	0	0	0	0	0	0	0	0	0	0	0	0	0	0	11	8	0	0	0	0	0	0	0	0	0	0	0	0	1	3.67843	1
MYCBP2	MYCBP2	13	0.115	2.18387e-05	7.2734e-06	5.51479e-05	0	0	0	0	1	0	0	0	0	0	1	1	0	0	0	0	0	0	1	0	0	0	1	0	6	2	21	14	196	170	5	3	1	3	31	58	0	0	0	0	1.02442	1.17295	3.05877
PTGER4	PTGER4	5	0.3	1.69996e-06	4.92615e-06	7.45223e-06	0	0	0	0	0	0	0	0	1	0	0	0	0	0	0	0	0	0	0	0	0	0	0	0	2	0	3	3	19	27	0	0	0	0	3	4	0	0	0	0	1.36801	2.68649	1
ABCC1	ABCC1	16	0.397	6.5665e-06	6.8057e-10	2.11067e-05	0	0	0	0	0	0	0	0	0	0	1	0	0	0	0	0	0	0	0	0	0	0	0	0	6	7	0	0	141	116	2	4	0	0	14	18	0	0	1	0	1	1	3.67487
ARHGAP20	ARHGAP20	11	0.431	3.90007e-06	6.8057e-10	1.76072e-09	0	0	0	0	0	0	1	0	0	0	0	0	0	0	0	0	0	0	0	0	0	0	0	0	0	0	0	0	0	0	2	2	0	0	0	0	0	0	0	0	3.67378	1	1
BICD2	BICD2	9	0.305	2.30229e-06	2.74004e-08	1.98525e-05	0	0	0	0	0	0	0	0	0	0	0	0	0	0	0	0	0	0	0	0	0	0	0	0	0	0	3	1	80	58	0	1	0	0	12	17	0	0	0	0	1	1.62443	2.26072
USP42	USP42	7	0.133	3.89923e-06	4.65227e-06	1.32624e-06	0	0	0	0	0	0	0	0	0	0	1	0	0	0	0	0	0	0	0	0	0	0	0	0	6	8	10	8	8	4	0	0	2	1	1	5	0	0	0	0	1	2.27712	1.61228
AARS	AARS1	16	0.617	5.61862e-06	6.8057e-10	1.76072e-09	0	0	0	0	0	0	0	1	0	0	0	0	0	0	0	0	0	0	0	0	0	0	0	0	6	3	0	0	0	0	3	0	0	0	0	0	0	0	0	0	3.67135	1	1
NCBP1	NCBP1	9	0.094	4.36823e-06	3.33461e-06	9.77296e-06	1	0	0	0	0	0	0	0	0	0	0	0	0	0	0	0	0	0	0	0	0	0	0	0	1	1	4	3	38	38	0	0	2	7	4	14	0	0	0	0	3.61164	1	1.01624
MOS	MOS	8	0.679	5.8017e-07	2.21434e-07	8.34135e-06	1	0	0	0	0	0	0	0	0	0	0	0	0	0	0	0	0	1	0	0	0	0	0	0	0	0	0	0	49	48	0	0	0	0	2	10	0	0	0	0	2.061	1	1.78009
PRG4	PRG4	1	0.743	2.84783e-06	6.8057e-10	1.76072e-09	0	0	0	0	0	0	0	0	0	0	0	0	0	0	0	0	0	0	0	0	0	0	0	0	3	1	0	0	0	0	4	0	0	0	0	0	0	0	0	0	3.6658	1	1
ST3GAL4	ST3GAL4	11	0.607	1.69527e-06	4.17234e-08	5.79403e-06	0	0	0	0	0	0	0	0	0	0	0	0	0	0	0	0	0	0	0	0	0	0	0	0	3	0	0	0	29	37	3	1	0	0	4	6	0	0	0	0	3.65801	1	1
SH3BP5	SH3BP5	3	0.591	1.7214e-06	1.8009e-06	3.3305e-06	0	0	0	0	0	0	0	0	0	0	0	0	0	0	0	0	0	0	0	0	0	0	0	0	2	2	9	4	16	16	1	2	1	1	3	3	0	0	0	0	1	3.28236	1.11263
SLC18A2	SLC18A2	10	0.511	2.07466e-06	6.8057e-10	4.11916e-06	0	0	0	0	0	0	0	0	0	0	0	0	0	0	0	0	0	0	0	0	0	0	0	0	4	1	0	0	9	8	2	0	0	0	0	4	0	0	0	0	3.6519	1	1
KLB	KLB	4	0.425	4.52853e-06	4.14621e-07	1.5574e-05	0	0	0	0	0	0	0	0	0	0	0	0	0	0	0	0	0	0	0	0	0	0	1	0	11	8	1	2	74	64	2	1	0	0	4	18	0	0	0	0	2.69146	1	1.35563
PTPRK	PTPRK	6	0.309	7.90633e-06	6.8057e-10	2.28277e-05	0	0	0	0	0	0	0	0	0	0	0	0	0	0	0	0	0	0	0	0	0	0	0	0	11	7	0	0	73	77	2	0	0	0	12	24	0	0	0	0	3.40332	1	1.0719
RASGRP3	RASGRP3	2	0.512	2.54583e-06	6.8057e-10	1.76072e-09	0	0	0	0	0	0	0	0	0	0	0	0	0	0	0	0	0	0	0	0	0	0	0	0	2	3	0	0	0	0	4	1	0	0	0	0	0	0	0	0	3.64545	1	1
LRP6	LRP6	12	0.318	1.03207e-05	6.8057e-10	1.75353e-05	1	0	0	0	1	0	0	0	0	0	1	0	0	0	0	0	0	0	0	0	0	0	0	0	0	0	0	0	81	77	1	0	0	0	16	20	0	0	0	0	2.05639	1	1.77239
NFIX	NFIX	19	0.149	1.61597e-06	8.61381e-06	4.19305e-06	0	0	1	0	0	0	0	0	0	0	0	0	0	0	0	0	0	0	0	0	0	0	0	0	1	0	7	4	6	10	2	0	1	3	4	3	0	0	0	0	3.64404	1	1
WDR60	WDR60	7	0.665	5.62766e-06	6.8057e-10	1.76072e-09	0	1	0	0	0	0	0	0	0	0	0	0	0	0	0	0	0	0	0	0	0	0	0	0	25	17	0	0	0	0	2	2	0	0	0	0	0	0	0	0	3.64253	1	1
ANKRD46	ANKRD46	8	0.597	1.14617e-06	4.15533e-07	3.56993e-06	0	0	0	0	0	0	0	0	0	0	0	0	0	0	0	0	0	1	0	0	0	0	0	0	0	0	2	1	13	16	0	0	1	0	1	3	0	0	0	0	1	2.33667	1.55872
BRD8	BRD8	5	0.516	5.88143e-06	5.05613e-06	1.67871e-06	0	0	0	1	0	0	1	0	0	1	0	0	0	0	0	0	0	0	0	0	0	0	0	0	6	3	14	9	9	8	0	0	3	5	1	2	0	0	0	0	2.67071	1.28844	1.05794
PLXNA4	PLXNA4	7	0.229	7.35509e-06	7.95475e-07	4.02124e-05	0	0	0	0	1	0	0	0	0	0	0	0	0	0	0	0	0	0	0	0	0	0	1	0	0	0	2	0	202	210	0	1	0	0	31	45	0	0	0	0	1	1.52422	2.38431
SMAP2	SMAP2	1	0.553	2.68168e-06	6.8057e-10	3.83009e-06	1	0	0	0	0	0	0	0	0	0	0	0	0	0	0	0	0	0	0	0	0	0	0	0	17	18	0	0	28	23	0	0	0	0	5	5	0	0	0	0	2.63394	1	1.37814
PCSK7	PCSK7	11	0.514	3.02187e-06	1.01937e-06	1.32283e-05	0	0	0	0	0	0	0	0	0	0	0	0	0	0	0	0	0	0	0	0	0	0	0	0	3	1	0	2	64	50	2	2	0	0	13	8	0	0	0	0	1.60096	1	2.26498
ISL1	ISL1	5	0.408	1.11401e-06	4.09143e-06	3.92295e-06	0	0	0	0	0	0	0	0	1	0	0	0	0	0	0	0	0	0	0	0	0	0	0	0	0	0	7	4	46	34	0	0	0	2	3	5	0	0	0	0	1	2.16899	1.67147
ELFN2	ELFN2	22	0.327	1.52914e-06	6.14017e-07	1.83277e-05	0	0	0	0	0	1	0	0	0	0	0	0	0	0	0	0	0	0	0	0	0	0	0	0	2	2	1	0	126	106	0	0	0	0	12	17	0	0	0	0	1	1.21709	2.97856
HNRNPH1	HNRNPH1	5	0.109	2.40178e-06	4.20745e-06	5.8383e-06	0	0	0	0	0	0	0	0	0	0	0	0	0	0	0	0	0	0	0	0	0	0	0	0	0	0	5	3	13	17	0	0	2	0	0	2	0	0	0	0	1	3.62257	1
GALNT1	GALNT1	18	0.587	2.61752e-06	1.98782e-07	6.27019e-06	0	0	0	0	0	0	0	0	0	0	0	1	0	0	0	0	0	1	0	0	0	0	0	0	1	0	1	0	9	3	1	0	0	0	5	3	0	0	0	0	1.46334	1.25091	1.97706
SCUBE1	SCUBE1	22	0.313	4.4947e-06	6.94182e-07	1.53447e-05	0	0	0	0	1	0	1	0	0	0	0	0	0	0	0	0	0	0	0	0	0	0	0	0	2	3	1	1	79	71	0	0	0	0	3	7	0	0	0	0	2.37211	1	1.5254
INPP5A	INPP5A	10	0.308	2.68268e-06	3.79572e-08	9.46953e-06	0	0	0	0	0	0	0	0	0	0	2	0	0	0	0	0	0	0	0	0	0	0	0	0	2	1	0	0	63	72	0	0	0	0	0	3	0	0	0	0	1.06116	1	3.40286
FGFR2	FGFR2	10	0.27	4.15936e-06	2.4505e-06	1.05449e-05	0	0	0	0	0	0	0	0	0	0	1	1	0	0	0	0	0	0	0	0	0	0	0	0	2	0	11	9	22	27	0	0	2	1	9	11	0	0	0	0	1.1752	3.04013	1.0105
SOX17	SOX17	8	0.415	8.38003e-07	3.03827e-06	1.0705e-05	0	0	0	0	0	0	0	0	0	0	1	0	0	0	0	0	0	0	0	0	0	0	0	0	0	0	9	5	34	38	0	0	1	0	0	0	0	0	0	0	1	3.60692	1
LRRC25	LRRC25	19	0.326	1.11066e-06	6.8057e-10	2.12499e-06	0	0	0	0	0	0	0	0	0	0	0	0	0	0	0	0	0	0	0	0	0	0	0	0	0	0	0	0	2	3	3	1	0	0	1	2	0	0	0	0	3.60553	1	1
LATS2	LATS2	13	0.297	2.97547e-06	4.40513e-07	2.12124e-05	0	0	0	0	0	0	0	0	0	0	1	1	0	0	0	0	0	0	0	0	0	0	1	0	2	2	0	0	122	97	0	1	0	0	17	18	0	0	0	0	1	1	3.60276
SGSM1	SGSM1	22	0.483	4.89468e-06	1.88626e-06	5.44212e-06	0	0	0	0	0	0	0	0	0	0	0	0	0	0	0	0	0	0	0	0	0	0	0	0	5	1	27	27	17	16	0	0	1	0	1	2	0	0	0	0	1.60104	2.14873	1.04642
BPTF	BPTF	17	0.099	1.2824e-05	7.24113e-06	3.49815e-05	0	0	0	0	1	0	0	0	0	0	0	0	0	0	0	0	0	0	0	0	0	0	0	0	0	1	11	11	137	133	1	1	3	1	18	30	0	0	0	0	1	2.04252	1.76133
ZNF570	ZNF570	19	0.75	2.11703e-06	6.8057e-10	4.93754e-07	0	0	0	0	0	0	0	0	0	0	0	0	0	0	0	0	0	0	0	0	0	0	0	0	2	1	0	0	19	14	4	1	0	0	0	0	0	0	0	0	2.88362	1	1.24674
TOMM22	TOMM22	22	0.66	5.13789e-07	2.8441e-07	1.98507e-06	0	0	0	0	0	0	0	0	0	0	0	0	0	0	0	0	0	0	0	0	0	0	0	0	0	0	1	1	7	20	0	0	2	0	0	3	0	0	0	0	1	3.59309	1
SHANK1	SHANK1	19	0.184	7.23617e-06	6.53901e-07	2.8043e-05	0	0	0	0	2	0	0	1	0	0	0	0	0	0	0	0	0	0	0	0	0	0	1	0	1	3	0	0	91	71	0	0	1	0	7	16	0	0	0	0	1	1.84418	1.94762
LEMD3	LEMD3	12	0.253	3.80493e-06	6.8057e-10	1.76072e-09	1	0	0	0	0	0	0	0	0	0	0	0	0	0	0	0	0	0	0	0	0	0	0	0	3	0	0	0	0	0	0	1	0	0	0	0	0	0	0	0	3.5912	1	1
DFNB31	WHRN	9	0.668	2.45354e-06	2.14801e-07	1.00697e-05	0	0	0	0	0	0	0	0	0	0	0	1	0	0	0	0	0	0	0	0	0	0	0	0	2	4	5	2	68	66	2	1	0	0	6	13	0	0	0	0	1.25364	2.06012	1.38806
KLHL6	KLHL6	3	0.805	2.15171e-06	2.36044e-06	2.00537e-06	0	0	1	0	0	0	0	0	0	0	0	0	0	0	0	0	0	0	0	0	0	0	0	0	1	5	4	7	9	9	1	0	0	0	1	2	0	0	0	0	1	3.47981	1.03019
SUGP1	SUGP1	19	0.271	2.7068e-06	2.72001e-06	1.81962e-06	0	0	0	0	0	0	0	0	0	0	0	0	0	0	0	0	0	0	0	0	0	0	0	0	1	1	7	6	3	5	0	1	2	0	0	2	0	0	0	0	1	3.58083	1
GLI2	GLI2	2	0.309	4.53824e-06	6.8057e-10	2.48328e-05	0	1	0	0	0	0	0	0	0	0	1	0	0	0	0	0	0	0	0	0	0	0	0	0	0	1	0	0	186	164	0	0	0	0	11	24	0	0	0	0	1	1	3.57344
EDF1	EDF1	9	0.509	8.30884e-07	1.47692e-06	2.90845e-06	0	0	0	0	0	0	1	0	0	0	0	0	0	0	0	0	0	0	0	0	0	0	0	0	0	0	5	2	7	4	0	0	0	2	2	3	0	0	1	0	3.27963	1	1.0894
SP140L	SP140L	2	0.795	2.87045e-06	1.60779e-06	4.06877e-07	0	0	0	0	0	0	0	0	0	0	0	0	0	0	0	0	0	0	0	0	0	0	0	0	9	8	0	0	0	0	5	1	0	1	0	0	0	0	0	0	3.57222	1	1
PSD4	PSD4	2	0.37	3.9587e-06	3.44989e-06	5.27624e-06	1	0	0	0	0	0	0	0	0	0	0	0	0	0	0	0	0	0	0	0	0	0	0	0	2	2	9	14	16	15	2	2	1	7	1	2	0	0	0	0	3.42223	1	1.04262
ZMIZ2	ZMIZ2	7	0.218	3.62386e-06	6.8057e-10	1.02427e-05	0	0	0	0	0	0	0	0	0	0	0	0	0	0	0	0	0	0	1	0	0	0	0	0	0	3	0	0	74	76	0	0	0	0	5	10	0	0	0	0	2.67576	1	1.33311
RBPJ	RBPJ	4	0.241	3.55452e-06	3.96768e-06	6.19875e-06	0	0	0	0	0	0	0	0	0	0	1	0	0	0	0	0	0	0	0	0	0	0	0	0	1	0	3	4	19	23	0	0	3	0	3	7	0	0	0	0	1	3.56115	1.00093
PEG3	PEG3	19	0.506	4.99334e-06	6.8057e-10	1.76072e-09	1	0	0	0	0	0	0	0	0	0	0	0	0	0	0	0	0	0	0	0	0	0	0	0	0	0	0	0	0	0	2	1	0	0	0	0	0	0	0	0	3.55788	1	1
TMEM121	TMEM121	14	0.674	5.0709e-07	8.57662e-06	5.29278e-06	0	0	0	0	0	0	0	1	0	0	0	0	0	0	0	0	0	0	0	0	0	0	0	0	1	0	34	29	23	17	0	0	0	0	0	1	0	0	0	0	1.10656	2.70558	1.18797
ASIC2	ASIC2	17	0.192	2.08102e-06	4.22128e-06	1.1894e-05	0	0	0	0	0	0	0	0	0	0	0	0	0	0	0	0	0	0	0	0	0	0	0	0	6	2	4	1	39	40	0	0	0	0	5	11	0	0	0	0	2.17991	1.56101	1.04508
EFCAB4B	CRACR2A	12	0.866	2.92103e-06	6.8057e-10	1.76072e-09	0	0	0	0	0	0	0	0	0	0	0	0	0	0	0	0	0	0	0	0	0	0	0	0	17	12	0	0	0	0	5	1	0	0	0	0	0	0	0	0	3.55344	1	1
DNAH9	DNAH9	17	0.722	1.77684e-05	6.8057e-10	1.76072e-09	0	0	0	0	0	0	0	0	0	0	0	0	0	0	0	0	0	0	0	0	0	0	0	0	66	61	0	0	0	0	8	12	0	0	0	0	0	0	0	0	3.55161	1	1
STK32C	STK32C	10	0.486	2.03998e-06	3.3186e-06	7.25832e-06	0	0	0	0	0	0	0	0	0	0	0	0	0	0	0	0	0	0	0	0	1	0	1	0	0	0	15	17	16	13	0	0	3	5	0	0	0	0	0	0	1	2.75751	1.28388
ATP2C1	ATP2C1	3	0.182	4.9905e-06	1.43052e-06	1.04221e-05	0	0	0	0	0	0	0	0	0	0	0	0	0	0	0	0	0	0	0	0	0	0	0	0	2	3	4	2	26	20	1	0	1	0	10	12	0	0	0	0	1	2.64181	1.33792
IGF2BP2	IGF2BP2	3	0.428	3.15068e-06	3.23362e-07	1.08962e-05	1	0	0	0	0	0	0	0	0	0	0	0	0	0	0	0	0	0	0	0	0	0	0	0	1	1	0	0	15	10	1	1	0	0	7	5	0	0	0	0	2.92114	1	1.2096
TMEM52	TMEM52	1	1.614	3.20997e-07	1.01691e-06	1.58957e-06	0	0	0	0	0	0	0	0	0	0	0	0	0	0	0	0	0	0	0	0	0	0	0	0	2	0	11	6	7	5	1	1	0	0	0	0	0	0	0	0	1	3.30597	1.06807
FBXW11	FBXW11	5	0.314	3.26072e-06	6.47286e-06	4.55537e-06	0	0	0	0	1	0	0	0	0	0	0	0	0	0	0	0	0	0	0	0	0	0	0	0	1	0	6	6	5	9	0	0	3	0	3	8	0	0	0	0	1.00629	3.3838	1.03689
ZC3H12A	ZC3H12A	1	0.511	2.34383e-06	6.8057e-10	9.89722e-06	0	0	0	0	0	0	0	0	0	0	2	0	0	0	0	0	0	0	0	0	0	0	0	0	1	1	0	0	42	49	0	0	0	0	8	10	0	0	0	0	1	1	3.52717
TRPM3	TRPM3	9	0.453	7.88707e-06	6.05128e-06	1.43653e-05	1	0	0	0	0	0	0	0	0	0	0	0	0	0	0	0	0	0	0	0	0	0	0	0	5	8	19	14	77	57	1	4	7	10	12	18	0	0	0	0	1	1.53708	2.29326
ATXN1	ATXN1	6	0.316	1.95339e-06	6.8057e-10	1.18519e-05	0	0	0	0	0	0	0	0	0	0	1	0	0	0	0	0	0	1	0	0	0	0	0	0	1	0	0	0	72	55	0	0	0	0	8	11	0	0	0	0	1.09087	1	3.22412
EXOC8	EXOC8	1	0.194	2.36929e-06	9.14844e-07	1.19367e-05	0	0	0	0	0	0	0	0	0	0	0	0	0	0	0	0	0	0	0	0	0	0	0	0	2	2	3	0	34	28	0	0	1	0	1	12	0	0	0	0	1	3.48038	1.00826
RPL7	RPL7	8	0.181	1.98504e-06	7.8766e-07	1.05004e-06	0	0	0	0	0	0	0	0	0	0	0	0	0	0	0	0	0	0	0	0	0	0	0	0	0	0	0	0	1	0	0	0	2	0	1	4	0	0	0	0	1	3.50761	1
ZYG11B	ZYG11B	1	0.252	3.23392e-06	3.69705e-06	9.46325e-06	0	0	0	0	0	0	0	0	1	0	0	0	0	0	0	0	0	0	0	0	0	0	0	0	1	1	7	7	31	37	0	0	3	4	5	6	0	0	0	0	1	3.50615	1
FRG2	FRG2	4	1.781	5.46954e-08	2.27434e-06	3.19726e-06	0	0	0	0	0	0	0	0	0	0	0	0	0	0	0	0	0	0	0	0	0	0	0	0	0	0	1	0	0	1	0	0	2	0	0	0	0	0	0	0	1	3.50284	1
ZNF441	ZNF441	19	1.015	3.2969e-07	6.8057e-10	5.24809e-06	0	0	0	0	0	0	0	0	0	0	0	0	0	0	0	0	0	0	0	0	0	0	0	0	0	1	0	0	81	52	3	0	0	0	1	5	0	0	0	0	1.27922	1	2.73685
PRH2	PRH2	12	1.684	2.94029e-07	8.37288e-07	2.45396e-06	0	0	0	0	0	0	0	0	0	0	0	0	0	0	0	0	0	0	0	0	0	0	0	0	0	0	0	0	0	0	0	0	2	0	0	0	0	0	0	0	1	3.4973	1
THBS1	THBS1	15	0.235	4.56839e-06	6.8057e-10	1.8708e-05	0	0	0	0	0	0	1	0	0	0	0	0	0	0	0	0	0	0	0	0	0	0	0	0	1	2	0	0	94	87	0	0	0	0	9	30	0	0	0	0	2.55106	1	1.36966
PTPRJ	PTPRJ	11	0.634	5.34828e-06	6.8057e-10	1.60844e-06	0	0	0	0	0	0	0	1	0	0	0	0	0	0	0	0	0	0	0	0	0	0	0	0	10	6	0	0	1	4	3	1	0	0	1	4	0	0	0	0	3.49292	1	1
U2SURP	U2SURP	3	0.077	5.97891e-06	3.55219e-06	1.03774e-05	0	0	0	0	1	0	1	0	0	0	1	0	0	0	0	0	0	0	0	0	0	0	0	0	0	0	0	2	20	26	0	0	1	2	2	3	0	0	0	0	3.49006	1	1
PCDHGB6	PCDHGB6	5	0.773	2.68101e-06	6.8057e-10	1.23486e-05	0	0	0	0	1	0	0	0	0	0	0	0	0	0	0	0	0	0	0	0	0	0	0	0	13	9	0	0	71	53	0	0	0	0	11	13	0	0	0	0	1.5353	1	2.27165
ZNF585A	ZNF585A	19	0.736	2.29308e-06	2.08617e-07	9.15691e-06	0	0	0	0	2	0	0	0	0	0	0	0	0	0	0	0	0	0	0	0	0	0	0	0	0	0	0	0	15	17	1	1	0	0	2	7	0	0	0	0	1.10525	1	3.15543
FGF12	FGF12	3	0.537	9.75972e-07	2.55899e-06	3.04902e-06	0	0	0	0	0	0	0	0	0	0	0	0	0	0	0	0	0	0	0	0	0	0	0	0	1	0	10	4	14	4	0	0	1	2	2	3	0	0	0	0	1.122	2.35634	1.31835
SLC38A10	SLC38A10	17	0.863	2.93544e-06	5.53588e-07	5.64738e-06	0	0	0	0	0	0	0	0	0	0	0	0	0	0	0	0	0	0	0	0	0	0	0	0	5	3	5	0	42	41	0	3	0	0	1	9	0	0	0	0	1	3.15323	1.10521
TP63	TP63	3	0.267	3.97712e-06	1.19369e-07	1.27847e-05	0	0	0	0	0	0	0	0	0	0	0	0	0	0	0	0	0	0	0	0	0	0	0	0	7	5	0	0	46	27	1	0	0	0	6	6	0	0	1	0	1.90115	1	1.83101
CDH10	CDH10	5	0.419	3.52554e-06	6.8057e-10	1.20268e-05	1	0	0	0	1	0	0	0	0	0	0	0	0	0	0	0	0	0	0	0	0	0	0	0	3	0	0	0	57	53	0	1	0	0	4	12	0	0	0	0	2.80668	1	1.23844
VRTN	VRTN	14	0.264	1.29102e-06	6.8057e-10	1.26301e-05	0	0	0	0	0	0	0	0	0	0	0	0	0	0	0	0	0	0	0	0	0	0	0	0	0	0	0	0	81	98	2	0	0	0	15	24	0	0	0	0	3.09362	1	1.12239
NFYA	NFYA	6	0.509	1.98605e-06	2.55159e-06	3.10418e-06	0	0	0	0	0	0	0	0	0	1	0	0	0	0	0	0	0	0	0	0	0	0	0	0	3	0	4	3	6	5	1	1	1	0	4	2	0	0	0	0	1.67973	1.83477	1.12382
KCNA2	KCNA2	1	0.38	1.92223e-06	5.88508e-06	4.19914e-06	0	0	0	0	0	0	0	0	0	1	0	0	0	0	0	0	0	0	0	0	0	0	0	0	0	0	13	8	11	9	0	0	6	7	5	8	0	0	0	0	1	3.13376	1.10443
DTHD1	DTHD1	4	0.828	2.19107e-06	8.0272e-07	3.40562e-06	0	0	0	0	0	0	0	0	0	0	0	0	0	0	0	0	0	0	0	0	0	0	0	0	37	23	0	0	0	0	0	0	0	0	0	0	0	0	0	0	3.4607	1	1
CNTN1	CNTN1	12	0.373	5.6759e-06	6.8057e-10	9.51676e-06	0	0	0	0	0	1	0	0	0	0	1	0	0	0	0	0	0	0	0	0	0	0	0	0	1	2	0	0	46	42	3	0	0	0	9	13	0	0	0	0	2.45772	1	1.40809
RAN	RAN	12	0.262	1.11215e-06	2.92664e-06	1.37758e-06	0	0	1	0	0	0	0	0	0	0	0	0	0	0	0	0	0	0	0	0	0	0	0	0	0	0	0	0	0	0	0	1	0	1	0	2	0	0	0	0	1	3.45997	1
EXOC5	EXOC5	14	0.178	2.60982e-06	6.8057e-10	6.16901e-06	0	0	0	0	1	0	0	0	0	0	0	0	0	0	0	0	0	0	0	0	0	0	0	0	0	0	0	0	23	23	2	0	0	0	1	2	0	0	0	0	3.02285	1	1.14125
HECTD2	HECTD2	10	0.265	3.89689e-06	3.55909e-06	6.96908e-06	0	0	0	0	0	0	0	0	1	0	0	0	0	0	0	0	0	0	0	0	0	0	0	0	1	0	1	3	30	20	0	0	0	0	3	6	0	0	0	0	1	2.54197	1.3563
VWC2	VWC2	7	0.274	7.78473e-07	4.2183e-06	6.70499e-06	0	0	0	0	0	0	0	0	1	0	0	0	0	0	0	0	0	0	0	0	0	0	0	0	0	0	29	25	30	34	0	0	0	2	0	1	0	0	0	0	1	3.4463	1
LRRC49	LRRC49	15	0.629	3.0428e-06	6.8057e-10	3.55903e-06	1	0	0	0	0	0	0	0	0	0	0	0	0	0	0	0	0	0	0	0	0	0	0	0	4	4	0	0	23	22	2	1	0	0	2	2	0	0	0	0	2.96922	1	1.16057
MCM4	MCM4	8	0.552	3.3433e-06	6.8057e-10	1.10407e-07	0	0	0	0	0	0	0	0	0	0	0	0	1	0	0	0	0	0	0	0	0	0	0	0	9	7	0	0	0	0	1	2	0	0	0	0	0	0	0	0	3.44459	1	1
ZC3H8	ZC3H8	2	0.56	1.28978e-06	6.8057e-10	1.76072e-09	0	0	0	0	0	0	1	0	0	0	0	0	0	0	0	0	0	0	0	0	0	0	0	0	2	0	0	0	0	0	0	0	0	0	0	0	0	0	0	0	3.44028	1	1
TMEM132E	TMEM132E	17	0.644	2.76258e-06	6.8057e-10	2.02245e-05	0	0	0	0	0	0	0	0	0	0	0	0	0	0	0	0	0	0	0	0	0	0	0	0	3	5	0	0	113	95	1	0	0	0	17	12	0	0	0	0	1.05795	1	3.2509
STX1A	STX1A	7	0.293	1.39881e-06	3.35576e-06	4.45484e-06	0	0	0	0	0	0	0	0	0	0	0	0	0	0	0	0	0	0	0	0	0	0	0	0	0	0	3	5	10	9	0	0	3	0	5	5	0	0	0	0	1	3.07338	1.11732
MARCH5	MARCHF5	10	0.392	1.53517e-06	1.48332e-06	2.60637e-06	0	0	0	0	0	0	0	0	0	0	0	0	0	0	0	0	0	0	0	0	0	0	0	0	0	0	4	1	6	3	0	0	1	0	0	1	0	0	0	0	1	3.28333	1.04551
GCC2	GCC2	2	0.414	7.42092e-06	1.15458e-06	4.22391e-07	0	0	0	0	0	0	0	0	0	0	0	0	0	0	0	0	0	0	0	0	0	0	0	0	3	3	0	0	0	0	0	1	2	0	0	0	0	0	0	0	1	3.43205	1
MAST2	MAST2	1	0.707	7.72577e-06	3.80204e-06	2.91672e-06	0	0	0	0	0	0	0	0	0	0	0	0	0	0	0	0	0	0	0	0	0	0	0	0	5	8	15	27	21	32	7	3	2	3	0	4	0	0	0	0	3.43071	1	1
PRAMEF6	PRAMEF6	1	1.978	3.4634e-07	5.11313e-06	4.18066e-06	0	0	0	0	0	0	0	0	1	0	0	0	0	0	0	0	0	0	0	0	0	0	0	0	0	0	0	0	0	2	0	0	0	0	0	0	0	0	0	0	1	3.42798	1
DUSP2	DUSP2	2	1.612	5.66133e-07	3.04224e-06	4.50717e-06	0	0	0	0	0	0	0	0	0	0	0	0	0	0	0	0	0	0	0	0	0	0	0	0	0	1	24	19	11	23	1	0	0	0	0	0	0	0	0	0	1	3.42398	1
MAF1	MAF1	8	0.345	1.12895e-06	1.99488e-06	2.80396e-06	0	0	0	0	1	0	0	0	0	0	0	0	0	0	0	0	0	0	0	0	0	0	0	0	1	0	6	2	2	2	1	0	0	1	3	2	0	0	0	0	1.90705	1.2846	1.39744
MAB21L1	MAB21L1	13	0.628	9.16778e-07	5.96318e-07	8.30286e-06	0	0	0	0	0	0	0	0	1	0	0	0	0	0	0	0	0	0	0	0	0	0	0	0	0	0	2	3	15	14	0	1	0	2	1	5	0	0	0	0	1	3.42273	1
ZCCHC6	TUT7	9	0.107	6.13636e-06	4.01639e-07	5.81442e-06	1	0	0	0	0	0	1	0	0	0	0	0	0	0	0	0	0	0	0	0	0	0	0	0	0	1	0	0	12	9	0	1	0	0	8	4	0	0	1	0	2.63458	1	1.29844
GLIS3	GLIS3	9	0.736	3.47177e-06	6.8057e-10	1.76072e-09	1	0	0	0	0	0	0	0	0	0	0	0	0	0	0	0	0	0	0	0	0	0	0	0	19	12	0	0	0	0	1	1	0	0	0	0	0	0	0	0	3.41943	1	1
ARL10	ARL10	5	1.229	9.83644e-07	1.56943e-06	5.20143e-06	0	0	0	0	0	0	0	0	0	0	0	1	0	0	0	0	0	0	0	0	0	0	0	0	3	2	5	1	33	27	1	1	0	0	6	6	0	0	0	0	1	2.35694	1.44933
ILKAP	ILKAP	2	0.301	1.58857e-06	2.17724e-06	4.46027e-06	0	0	0	0	0	0	0	0	0	0	0	0	0	0	0	0	0	0	0	0	0	0	0	0	2	0	2	2	12	11	1	0	1	0	1	4	0	0	0	0	2.27732	1.49761	1.00075
C9orf41	CARNMT1	9	0.695	1.83563e-06	1.09068e-06	4.14141e-06	0	0	0	0	0	0	0	0	0	0	0	0	0	0	0	0	0	0	0	0	0	0	0	0	3	2	3	1	13	12	0	1	2	1	0	0	0	0	0	0	1	3.24954	1.05012
GALNT2	GALNT2	1	0.488	3.64999e-06	6.8057e-10	1.06618e-05	0	0	0	0	1	0	1	0	0	0	1	0	0	0	0	0	0	0	0	0	0	0	0	0	4	0	0	0	40	30	0	2	0	0	7	2	0	0	0	0	2.06232	1	1.65346
PRDM14	PRDM14	8	0.6	1.85942e-06	2.51906e-06	4.36338e-06	0	0	0	0	0	0	0	0	0	0	0	0	0	0	0	0	0	0	0	0	1	0	1	0	1	2	0	3	24	22	0	0	0	1	2	2	0	0	0	0	1	2.14224	1.59159
AICDA	AICDA	12	1.329	1.13531e-06	1.8983e-06	3.27438e-06	0	0	0	0	0	0	0	0	0	0	0	0	0	0	0	0	0	0	0	0	0	0	0	0	0	0	6	8	8	10	1	0	5	3	2	5	0	0	0	0	1	3.40711	1
MRVI1	MRVI1	11	0.628	3.69271e-06	6.8057e-10	1.76072e-09	0	0	0	0	0	0	1	0	0	0	0	0	0	0	0	0	0	0	0	0	0	0	0	0	4	2	0	0	0	0	2	1	0	0	0	0	0	0	0	0	3.40461	1	1
USP20	USP20	9	0.481	4.8245e-06	6.8057e-10	1.01773e-05	0	0	0	0	1	0	0	0	0	0	0	1	0	0	0	0	0	0	0	0	0	0	1	0	10	3	0	0	62	78	2	2	0	0	7	19	0	0	0	0	3.40448	1	1
CCNC	CCNC	6	0.146	1.44321e-06	1.83326e-06	2.1857e-06	0	0	0	0	0	0	0	0	0	0	0	0	0	0	0	0	0	0	0	0	0	0	0	0	0	1	8	5	6	3	0	0	1	0	1	5	0	0	0	0	1	3.3099	1.02829
NR2F6	NR2F6	19	0.638	7.11272e-07	9.43968e-06	8.57157e-06	0	0	0	0	0	0	1	0	0	0	0	0	0	0	0	0	0	0	0	0	0	0	0	0	0	0	29	28	41	29	0	0	1	5	0	0	0	0	0	0	2.2742	1	1.49425
PAK7	PAK5	20	0.167	2.14919e-06	6.8057e-10	5.49735e-06	0	0	0	0	0	0	0	0	0	0	0	0	0	0	0	0	0	0	0	0	0	0	0	0	3	1	0	0	42	33	1	0	0	0	3	5	0	0	0	0	2.27875	1	1.48987
ZBTB24	ZBTB24	6	0.664	2.65454e-06	6.8057e-10	1.76072e-09	0	0	0	0	0	0	0	0	0	0	0	0	0	0	0	0	0	0	0	0	0	0	0	0	7	2	0	0	0	0	2	0	0	0	0	0	0	0	0	0	3.39297	1	1
PAQR5	PAQR5	15	0.705	1.06195e-06	6.8057e-10	1.60369e-07	0	0	0	0	0	0	0	0	0	0	0	0	0	0	0	0	0	0	1	0	0	0	0	0	11	8	0	0	2	5	1	1	0	0	0	0	0	0	0	0	3.39079	1	1
ITGB3	ITGB3	17	0.519	3.65854e-06	6.8057e-10	1.23224e-05	0	0	0	0	1	1	1	0	0	0	0	0	0	0	0	0	0	0	0	0	0	0	0	0	2	6	0	0	88	77	3	3	0	0	11	24	0	0	0	0	1.81974	1	1.86206
ALK	ALK	2	0.448	6.80418e-06	6.8057e-10	1.76072e-09	0	0	0	0	0	0	0	0	0	0	0	0	0	0	0	0	0	0	0	0	0	0	0	0	8	3	0	0	0	0	3	2	0	0	0	0	0	0	0	0	3.38803	1	1
USP4	USP4	3	0.634	4.25869e-06	6.8057e-10	1.76072e-09	0	0	0	0	0	0	0	0	0	0	0	0	0	0	0	0	0	0	1	0	0	0	0	0	19	16	0	0	0	0	2	3	0	0	0	0	0	0	0	0	3.38678	1	1
SPOCK2	SPOCK2	10	0.475	1.93965e-06	6.8057e-10	2.37959e-06	0	0	0	0	0	0	0	0	0	0	0	0	0	0	0	1	0	0	0	0	0	0	0	0	2	3	0	0	24	26	0	0	0	0	0	1	0	0	0	0	3.19566	1	1.05852
PAX2	PAX2	10	0.434	1.7812e-06	3.10552e-06	2.93498e-06	0	0	0	0	0	0	0	0	0	0	0	0	0	0	0	0	0	0	0	0	0	0	0	0	1	0	3	3	9	13	0	0	3	1	1	1	0	0	0	0	1.09358	3.09182	1
TNC	TNC	9	0.445	7.88506e-06	6.8057e-10	1.76072e-09	0	0	0	0	0	0	0	0	0	0	0	0	0	0	0	0	0	0	0	0	0	0	0	0	13	8	0	0	0	0	3	2	0	0	0	0	0	0	0	0	3.37979	1	1
RSBN1	RSBN1	1	0.444	3.74882e-06	4.94088e-06	4.88583e-06	0	0	0	0	0	0	0	0	0	0	0	0	0	0	0	0	0	0	0	0	0	0	0	0	18	18	4	3	32	28	0	1	2	0	4	6	0	0	0	0	1	2.60713	1.29544
GPN2	GPN2	1	0.852	1.15371e-06	1.66126e-06	1.87925e-06	0	0	0	0	0	0	0	0	0	0	0	0	0	0	0	0	0	0	0	0	0	0	0	0	1	3	0	0	6	6	0	0	2	0	0	0	0	0	0	0	1	3.33038	1.0133
UBE2M	UBE2M	19	0.492	6.85812e-07	2.40589e-06	2.55506e-06	0	0	0	0	0	0	0	0	0	0	0	0	0	0	0	0	0	0	0	0	0	0	0	0	0	0	1	1	12	9	0	0	3	1	0	5	0	0	0	0	1	3.28872	1.02606
ZFYVE20	RBSN	3	0.455	4.09404e-06	6.8057e-10	8.14195e-06	0	0	0	0	0	0	0	0	0	0	0	0	0	0	0	0	0	0	0	0	0	0	0	0	4	3	0	0	52	52	2	0	0	0	13	21	0	0	0	0	2.40072	1	1.40472
MEX3B	MEX3B	15	0.574	7.8715e-07	9.64315e-07	1.29299e-05	0	0	0	0	0	0	0	0	0	0	0	0	0	0	0	0	0	0	0	0	0	0	0	0	0	0	0	0	28	21	1	0	1	0	5	5	0	0	0	0	1.50456	1.81051	1.23791
IMPDH2	IMPDH2	3	0.798	2.16896e-06	3.46296e-06	5.6601e-06	0	0	0	0	0	0	0	0	0	0	0	0	0	0	0	0	0	0	0	0	0	0	1	0	6	3	5	5	24	19	1	3	3	2	5	5	0	0	0	0	1.07049	1.88985	1.66622
DNAJB5	DNAJB5	9	0.587	1.85255e-06	4.34643e-06	8.76171e-06	0	0	0	0	1	0	1	0	0	0	0	0	0	0	0	0	0	0	0	0	0	0	0	0	3	0	4	9	37	41	0	0	1	3	2	7	0	0	0	0	3.36688	1	1
MORC1	MORC1	3	0.505	4.54612e-06	6.8057e-10	1.76072e-09	1	0	0	0	0	0	0	0	0	0	0	0	0	0	0	0	0	0	0	0	0	0	0	0	5	3	0	0	0	0	2	2	0	0	0	0	0	0	0	0	3.3656	1	1
HOXA11	HOXA11	7	0.329	7.43968e-07	3.63224e-06	4.89569e-06	0	0	0	0	0	0	0	0	0	0	0	0	0	0	0	0	0	0	0	0	0	0	0	0	3	0	25	20	21	18	0	0	0	1	1	2	0	0	0	0	1.77017	1.67506	1.13006
PTGER3	PTGER3	1	0.579	1.03698e-06	1.33692e-06	9.57256e-06	0	0	0	0	0	0	0	0	0	0	0	0	0	0	0	0	0	0	0	0	0	0	0	0	2	0	4	0	24	31	0	0	1	1	2	3	0	0	0	0	1.28538	2.60598	1
HDAC2	HDAC2	6	0.1	2.54483e-06	4.74929e-06	3.11228e-06	0	0	0	0	0	0	0	0	0	0	0	0	0	0	0	0	0	0	0	0	0	0	0	0	1	1	6	2	6	8	0	0	2	1	0	0	0	0	0	0	1	3.34294	1
TAL1	TAL1	1	0.704	6.90753e-07	2.13236e-07	7.43526e-06	0	0	0	0	0	0	0	0	0	0	0	1	0	0	0	0	0	0	0	0	0	0	0	0	0	1	4	0	47	43	0	0	0	0	2	4	0	0	0	0	1	2.54441	1.31357
CHD6	CHD6	20	0.073	1.17335e-05	1.25706e-05	1.04949e-05	0	0	0	0	1	0	0	0	0	0	1	1	0	0	0	0	0	0	0	0	0	0	0	0	3	1	11	14	36	37	2	0	12	10	3	13	0	0	0	0	1.26561	2.64036	1
GOLGA8M	GOLGA8M	15	1.508	1.37484e-06	5.52136e-06	4.14287e-06	0	0	1	0	0	0	0	0	0	0	0	0	0	0	0	0	0	0	0	0	0	0	0	0	0	0	1	0	0	1	0	0	0	0	0	0	0	0	0	0	1	3.33908	1
ADRA1B	ADRA1B	5	0.785	7.07788e-07	4.28212e-06	1.16962e-05	0	0	0	0	0	0	0	0	0	0	0	0	0	0	0	0	0	0	0	0	0	0	0	0	0	4	28	24	39	28	0	0	0	0	2	9	0	0	0	0	1	2.65615	1.25585
CPT1A	CPT1A	11	0.661	4.65432e-06	6.8057e-10	1.04553e-05	0	0	0	0	0	0	0	0	0	0	0	0	0	0	0	0	0	0	0	0	0	0	0	0	7	5	0	0	36	29	3	1	0	0	5	10	0	0	0	0	2.6413	1	1.26212
HSPA8	HSPA8	11	0.201	2.11167e-06	6.8057e-10	1.76072e-09	0	0	0	0	0	0	0	0	0	0	0	0	0	0	0	0	0	0	0	0	0	0	0	0	1	0	0	0	0	0	2	0	0	0	0	0	0	0	0	1	3.33096	1	1
MAP7D1	MAP7D1	1	0.29	3.80761e-06	3.86775e-06	2.63507e-06	0	0	0	0	0	0	0	0	0	0	0	0	0	0	0	0	0	0	0	0	0	0	0	0	3	0	13	9	4	9	0	0	0	0	0	0	0	0	0	0	1.48232	2.24681	1
FAM50B	FAM50B	6	0.755	8.80129e-07	2.86425e-06	8.15839e-06	0	0	0	0	0	0	0	0	0	0	0	0	0	0	0	0	0	0	0	0	0	0	0	0	0	0	1	5	39	32	3	0	2	1	5	7	0	0	0	0	2.38555	1	1.39528
DZIP1	DZIP1	13	1.03	3.78383e-06	1.51029e-06	2.61182e-06	0	0	0	0	0	0	0	0	0	0	0	0	0	0	0	0	0	0	0	0	0	0	0	0	8	6	9	2	24	14	2	1	1	3	0	0	0	0	0	0	1.15682	2.06719	1.3913
DTL	DTL	1	0.496	3.41851e-06	6.8057e-10	4.04534e-06	0	0	0	0	0	0	0	0	0	0	0	0	0	0	0	0	0	0	0	0	0	0	0	0	2	0	0	0	9	11	3	1	0	0	1	5	0	0	0	0	3.32494	1	1
TMED10	TMED10	14	0.438	1.04813e-06	1.49356e-06	3.42886e-06	0	0	0	0	0	0	0	0	0	0	0	0	0	0	0	0	0	0	0	0	0	0	0	0	1	4	2	0	23	19	0	0	1	0	3	1	0	0	0	0	1	2.55385	1.30144
CACNA1C	CACNA1C	12	0.102	8.9641e-06	2.2974e-05	1.97123e-05	0	0	1	0	1	0	0	0	1	0	0	0	0	0	0	0	0	0	1	0	1	0	0	0	2	1	18	27	103	115	1	0	7	6	8	14	0	0	0	0	2.86147	1	1.16125
SP6	SP6	17	0.761	8.0132e-07	2.20072e-06	5.44246e-06	0	0	0	0	0	0	0	0	0	0	0	0	0	0	0	0	0	0	0	0	0	0	0	0	2	0	5	1	8	14	0	0	2	2	0	2	0	0	0	0	1.17393	2.82903	1
ARID4B	ARID4B	1	0.187	5.49031e-06	4.5014e-07	6.36505e-06	0	0	0	0	0	0	0	0	0	0	0	0	0	0	0	0	0	0	1	0	0	0	0	0	0	2	0	0	22	15	0	0	0	0	6	6	1	0	0	0	2.45176	1	1.35402
SLC25A44	SLC25A44	1	0.947	1.55289e-06	4.66073e-07	5.47798e-06	0	0	0	0	0	0	0	0	0	0	0	0	0	0	0	0	0	0	0	0	0	0	0	0	1	5	3	1	44	30	2	0	0	0	4	2	0	0	0	0	1.15964	1.57807	1.81396
ERCC3	ERCC3	2	0.786	4.62434e-06	6.8057e-10	7.82187e-06	0	0	0	0	0	0	0	0	0	0	0	0	0	0	0	0	0	0	0	0	0	0	0	0	30	30	0	0	43	28	2	2	0	0	9	9	0	0	0	0	1.74511	1	1.90059
PSMC2	PSMC2	7	0.119	2.45337e-06	5.56847e-06	2.52746e-06	0	0	0	0	0	0	0	0	0	0	0	0	0	0	0	0	0	0	0	0	0	0	0	0	0	0	3	3	3	8	1	0	5	4	1	0	0	0	0	0	1.64208	2.01668	1
B3GALT4	B3GALT4	6	0.735	1.52693e-06	1.95252e-06	6.43394e-06	0	0	0	0	0	0	0	0	0	0	0	0	0	0	0	0	0	0	0	0	0	0	0	0	2	1	4	9	15	11	3	0	0	2	5	2	0	0	0	0	2.6628	1	1.24265
GRAMD4	GRAMD4	22	0.162	3.51968e-06	2.46552e-06	1.10285e-05	0	0	0	0	0	0	1	0	0	0	0	0	0	0	0	0	0	0	0	0	0	0	0	0	0	2	7	6	20	33	0	0	0	0	2	6	1	1	1	0	2.84007	1.16433	1
OLIG3	OLIG3	6	0.506	4.29085e-07	2.41013e-07	6.17433e-06	0	0	0	0	0	0	0	0	0	0	0	0	0	0	0	0	0	0	0	0	0	0	0	0	0	0	2	1	30	24	2	1	0	0	4	3	0	0	0	0	1.91715	1.26373	1.3644
ATF2	ATF2	2	0.283	2.45522e-06	1.3289e-06	3.29018e-06	0	0	0	0	0	0	0	0	0	0	0	1	0	0	0	0	0	0	0	0	0	0	0	0	0	0	3	0	3	7	0	0	1	0	1	6	0	0	0	0	1	3.30433	1
USP38	USP38	4	0.644	3.3567e-06	5.34447e-07	3.03242e-06	0	0	0	0	0	0	0	0	0	0	0	0	0	0	0	0	0	0	0	0	0	0	0	0	9	5	0	2	17	9	3	3	0	0	3	3	0	0	0	0	2.47715	1	1.33333
ST5	DENND2B	11	0.214	5.79449e-06	6.8502e-07	1.23721e-05	0	0	0	0	0	1	0	0	0	0	0	0	0	0	0	0	0	0	0	0	0	0	0	0	0	0	4	0	44	51	1	0	0	0	5	9	0	0	0	0	1.33848	2.4664	1
HMHA1	AC004151.1	19	0.38	4.11899e-06	1.86485e-06	2.21384e-05	0	0	0	0	0	0	1	0	0	0	0	0	0	0	0	0	0	0	0	0	0	0	0	0	0	0	0	0	0	0	0	0	0	0	1	1	0	0	0	0	3.29782	1	1
TUBGCP4	TUBGCP4	15	0.716	3.88298e-06	1.36938e-06	5.09304e-06	1	0	0	0	0	0	0	0	0	0	0	0	0	0	0	0	0	0	0	0	0	0	0	0	2	7	2	1	25	28	4	2	2	2	4	9	0	0	0	0	2.09696	1.54214	1.01916
KIF3B	KIF3B	20	0.451	3.68467e-06	3.95081e-07	1.03777e-05	0	0	0	0	1	0	0	0	0	0	0	0	0	0	0	0	0	0	0	0	0	0	0	0	1	1	0	0	26	37	3	2	1	0	5	12	0	0	0	0	1.75988	1.87272	1
BCL10	BCL10	1	0.731	8.66059e-07	4.9413e-07	3.22317e-06	0	0	0	0	0	0	0	0	0	0	0	0	0	0	0	0	0	0	0	0	0	0	0	0	2	1	1	0	17	10	0	0	1	0	2	0	0	0	0	0	1.09858	2.28392	1.31311
KCNH4	KCNH4	17	0.215	3.84262e-06	3.21622e-06	1.37001e-05	0	0	0	0	2	0	0	0	0	0	0	0	0	0	0	0	0	1	0	0	0	0	1	0	2	3	35	38	44	56	0	1	2	4	7	12	0	0	0	0	1	1	3.29094
HSPA5	HSPA5	9	0.407	1.97918e-06	7.64019e-06	7.94538e-06	0	0	0	0	0	0	0	0	0	0	0	0	0	0	0	0	0	0	0	0	0	0	0	0	2	0	3	2	8	10	0	0	3	1	10	6	0	0	0	0	1.31237	2.19092	1.14373
BEND3	BEND3	6	0.347	2.05858e-06	6.8057e-10	1.95763e-05	0	0	0	0	1	0	0	0	0	0	2	0	0	0	0	0	0	0	0	0	0	0	0	0	1	2	0	0	59	48	1	0	0	0	14	16	0	0	0	0	1.19097	1	2.75988
KLHL20	KLHL20	1	0.511	3.4572e-06	4.24608e-06	7.91227e-06	0	0	0	0	1	0	0	0	0	0	0	0	0	0	0	0	0	0	0	0	0	0	0	0	1	2	4	5	16	22	1	1	8	7	2	12	0	0	0	0	1	3.28207	1
CD163	CD163	12	0.443	4.38348e-06	6.8057e-10	1.41784e-05	0	0	0	0	0	0	0	0	0	0	2	0	0	0	0	0	0	0	0	0	0	0	0	0	3	10	0	0	71	64	1	0	0	0	4	10	0	0	0	0	1	1	3.2797
PLCL2	PLCL2	3	0.088	2.97514e-06	8.66734e-07	1.35745e-05	0	0	0	0	2	0	0	0	0	0	1	0	0	0	0	0	0	0	0	0	0	0	0	0	0	0	2	4	26	37	1	0	0	1	7	10	0	0	0	0	1.59588	1	2.05498
NUCB1	NUCB1	19	0.852	2.7058e-06	6.8057e-10	2.45654e-06	0	0	0	0	1	0	0	0	0	0	0	0	0	0	0	0	0	0	0	0	0	0	0	0	10	6	0	0	13	6	2	0	0	0	1	2	0	0	0	0	1.95775	1	1.6744
AP1G1	AP1G1	16	0.202	5.57222e-06	5.39656e-06	4.29769e-06	0	0	0	0	0	0	0	0	0	0	0	0	0	0	0	0	0	0	1	0	0	0	0	0	0	1	8	14	25	28	0	0	1	0	6	8	0	0	0	0	2.9134	1	1.12208
RRAGD	RRAGD	6	0.436	1.09098e-06	8.70651e-07	5.44399e-06	0	0	0	0	0	0	0	0	0	0	0	0	0	0	0	0	0	1	0	0	0	0	0	0	0	0	13	10	11	14	0	0	0	0	1	2	0	0	0	0	1	2.18873	1.49251
FNBP1	FNBP1	9	0.359	2.88117e-06	6.29198e-07	9.84513e-07	0	0	0	0	0	0	0	0	0	0	0	0	0	0	0	0	0	0	1	0	0	0	0	0	0	1	0	0	2	5	0	0	0	0	0	0	0	0	0	0	3.26339	1	1
C1QL2	C1QL2	2	1.218	4.48699e-07	3.45529e-06	5.29227e-06	0	0	0	0	1	0	0	0	0	1	0	0	0	0	0	0	0	0	0	0	0	0	0	0	0	0	7	7	14	11	0	1	2	0	2	3	0	0	0	0	1	2.61016	1.2499
MTMR10	MTMR10	15	0.675	3.36172e-06	6.8057e-10	5.54946e-07	0	0	0	0	0	0	0	0	0	0	0	0	0	0	0	1	0	0	0	0	0	0	0	0	3	1	0	0	0	0	1	0	0	0	0	0	0	0	0	0	3.26125	1	1
HNF4A	HNF4A	20	0.505	2.27197e-06	2.02002e-06	4.39103e-06	0	0	0	0	0	0	0	0	0	1	0	0	0	0	0	0	0	0	0	0	0	0	0	0	0	0	6	1	11	7	0	1	1	1	1	4	0	0	0	0	1	3.07146	1.06093
MEST	MEST	7	0.467	2.02022e-06	1.77059e-06	5.30262e-06	1	0	0	0	0	0	0	0	0	0	0	0	0	0	0	0	0	0	0	0	0	0	0	0	0	0	3	5	13	17	0	0	0	3	4	4	0	0	0	0	3.25817	1	1
PXDN	PXDN	2	0.523	5.44693e-06	6.8057e-10	2.66045e-05	0	0	0	0	0	0	0	0	0	0	1	0	0	0	0	0	0	1	0	0	0	0	1	0	5	3	0	0	117	95	1	5	0	0	14	28	0	0	3	0	1	1	3.25491
ZMYND10	ZMYND10	3	0.859	2.22859e-06	6.8057e-10	1.76072e-09	0	0	0	0	0	0	0	0	0	0	0	0	0	0	0	0	0	0	0	0	0	0	0	0	9	5	0	0	0	0	5	1	0	0	0	0	0	0	0	0	3.25159	1	1
EGFR	EGFR	7	0.349	6.25512e-06	6.8057e-10	1.93515e-05	0	0	0	0	0	0	0	0	0	0	1	0	0	0	0	0	0	1	0	0	0	0	0	0	0	0	0	0	95	88	1	0	0	0	14	26	0	0	0	0	1.29748	1	2.50478
PTCH2	PTCH2	1	0.85	3.98298e-06	6.8057e-10	1.76072e-09	0	0	0	0	0	0	0	1	0	0	0	0	0	0	0	0	0	0	0	0	0	0	0	0	22	17	0	0	0	0	5	3	0	0	0	0	0	0	0	0	3.24653	1	1
VPS8	VPS8	3	0.458	7.64587e-06	6.8057e-10	1.76072e-09	0	0	0	0	0	0	1	0	0	0	0	0	0	0	0	0	0	0	0	0	0	0	0	0	26	17	0	0	0	0	1	4	0	0	0	0	0	0	0	0	3.24328	1	1
GUCD1	GUCD1	22	0.66	1.00098e-06	6.8057e-10	3.50623e-07	0	0	0	0	0	0	0	0	0	0	0	0	0	0	0	0	0	0	0	0	0	0	0	0	1	0	0	0	0	1	3	0	0	0	0	1	0	0	0	0	3.24279	1	1
HECW1	HECW1	7	0.253	8.73646e-06	6.8057e-10	2.86653e-05	0	0	0	0	1	0	0	0	0	0	1	0	0	0	0	1	0	0	0	0	0	0	0	0	4	4	0	0	116	97	0	1	0	0	11	35	0	0	0	0	1.88442	1	1.71899
KBTBD13	KBTBD13	15	1.87	8.57583e-07	6.8057e-10	1.13527e-05	0	0	0	0	0	0	0	0	0	0	0	0	0	0	0	0	0	0	0	0	0	0	0	0	5	5	0	0	95	61	0	0	0	0	0	0	0	0	0	0	1	1	3.23899
NEURL4	NEURL4	17	0.214	5.86937e-06	6.8057e-10	2.81999e-05	0	0	0	0	3	0	0	0	0	0	0	0	0	0	0	0	0	0	0	0	0	0	1	0	2	2	0	0	98	117	0	1	0	0	17	38	0	0	0	0	1	1	3.23873
ZNF287	ZNF287	17	0.395	2.97246e-06	6.8057e-10	1.03426e-05	0	0	0	0	0	0	0	0	0	0	0	0	0	0	0	1	0	0	0	0	0	0	0	0	0	4	0	0	29	34	1	0	0	0	5	15	0	0	0	0	3.23872	1	1
LRRK2	LRRK2	12	0.64	1.26622e-05	8.2745e-07	3.88492e-06	0	0	0	0	0	0	0	0	0	0	0	0	0	0	0	0	0	0	0	0	0	0	0	0	25	25	0	0	54	40	3	4	1	0	2	5	0	0	0	0	1	1.82528	1.77428
HOXA2	HOXA2	7	0.699	8.21537e-07	2.11545e-06	2.545e-06	0	0	0	0	0	0	0	0	0	0	0	0	0	0	0	0	0	0	0	0	0	0	0	0	1	0	11	6	5	7	0	3	1	1	0	1	0	0	0	0	1	3.23845	1
TIE1	TIE1	1	0.885	5.06403e-06	6.8057e-10	1.85858e-05	0	0	0	0	1	0	0	0	0	0	2	0	0	0	0	0	0	0	0	0	0	0	0	0	11	11	0	0	149	164	3	3	0	0	9	20	0	0	0	0	1.34015	1	2.41573
FRAS1	FRAS1	4	0.658	1.60694e-05	6.8057e-10	1.76072e-09	0	0	0	0	0	0	0	0	0	0	0	0	0	0	0	0	0	0	0	0	0	0	0	0	37	25	0	0	0	0	6	10	0	0	0	0	0	0	0	0	3.23532	1	1
RHBDD2	RHBDD2	7	0.529	9.94314e-07	6.8057e-10	2.53557e-06	0	0	0	0	0	0	0	0	0	0	0	0	0	0	0	0	0	0	1	0	0	0	0	1	1	1	0	0	19	17	0	0	0	0	0	5	0	0	0	0	3.07693	1	1.05068
PPP5C	PPP5C	19	0.209	2.67883e-06	8.72613e-07	9.47484e-06	0	0	0	0	2	0	0	0	0	0	0	0	0	0	0	0	0	0	0	0	0	0	0	0	0	0	0	0	12	12	0	0	0	0	3	7	0	0	0	0	1	1	3.23008
ANK3	ANK3	10	0.089	1.42857e-05	6.85253e-07	2.76991e-05	0	1	0	0	0	0	1	0	0	0	0	0	0	0	0	0	0	0	0	0	0	0	0	0	4	1	1	2	106	110	3	0	0	0	15	18	0	0	0	0	2.18431	1	1.47595
LRRC4B	LRRC4B	19	0.398	1.24741e-06	9.92578e-06	1.82839e-05	0	0	0	0	0	0	0	0	0	0	0	0	0	0	0	0	0	0	0	0	0	0	0	0	0	0	5	10	102	85	1	0	1	1	1	4	0	0	0	0	1.62192	1	1.98587
OLIG1	OLIG1	21	0.849	2.51066e-07	5.39833e-06	6.89353e-06	0	0	0	0	0	0	0	0	0	0	0	0	0	0	0	0	0	0	0	0	0	0	0	0	1	0	14	9	27	23	0	0	0	0	0	0	0	0	0	0	1.06003	2.57404	1.1795
DALRD3	DALRD3	3	1.143	1.78438e-06	1.54868e-06	4.59485e-06	0	0	0	0	0	0	0	0	0	0	0	0	0	0	0	0	0	0	0	0	0	0	0	0	12	19	6	1	12	10	1	0	0	0	0	0	0	0	0	0	1.01529	2.99135	1.0594
PHF21B	PHF21B	22	0.294	2.28654e-06	6.8057e-10	1.79824e-06	0	0	0	0	0	0	0	0	0	0	0	0	0	0	0	0	0	0	0	0	0	0	0	0	4	0	0	0	5	9	1	0	0	0	1	0	0	0	0	0	3.21547	1	1
TUBA4A	TUBA4A	2	0.62	1.35904e-06	5.08375e-06	5.96178e-06	0	0	0	0	0	0	0	0	0	0	0	0	0	0	0	0	0	0	0	0	0	0	0	0	3	0	2	7	8	8	2	0	3	6	5	5	0	0	0	0	3.05138	1	1.05357
VWA5B2	VWA5B2	3	0.597	4.58682e-06	6.37861e-07	1.95682e-05	0	0	0	0	0	0	0	0	0	0	0	0	0	0	0	0	0	0	0	0	0	0	0	0	5	13	6	1	106	125	0	0	0	0	0	0	0	0	0	0	1	3.17671	1.01195
QSER1	QSER1	11	0.208	5.75497e-06	6.8057e-10	1.76072e-09	0	0	0	0	0	0	0	0	0	0	0	0	0	0	0	0	0	0	0	0	0	0	0	0	4	3	0	0	0	0	4	2	0	0	0	0	0	0	0	0	3.21334	1	1
TNPO2	TNPO2	19	0.129	3.77863e-06	7.69686e-06	1.61918e-05	0	0	1	0	0	0	0	0	0	0	1	0	0	0	0	0	0	0	0	0	0	0	0	0	0	0	5	6	24	33	0	0	5	4	3	12	0	0	0	0	1	3.21308	1
CDC26	CDC26	9	0.85	3.58802e-07	6.93354e-07	1.59369e-06	0	0	0	0	0	0	0	0	0	0	0	0	0	0	0	0	0	0	0	0	0	0	0	0	0	0	7	2	0	0	0	0	0	0	0	0	0	0	0	0	1	3.20645	1
SLCO5A1	SLCO5A1	8	0.724	2.67129e-06	6.8057e-10	4.87868e-06	0	0	0	0	0	0	0	0	0	0	0	0	0	0	0	0	0	0	0	0	0	0	0	0	8	6	0	0	13	12	4	2	0	0	3	6	0	0	0	0	3.07989	1	1.04077
KAAG1	KAAG1	6	1.893	4.4483e-09	3.66334e-07	2.51401e-06	0	0	0	0	0	0	0	0	0	0	1	0	0	0	0	0	0	0	0	0	0	0	0	0	0	0	13	10	5	3	0	0	0	0	0	0	0	0	0	0	1	2.26282	1.41579
NTN3	NTN3	16	1.209	1.29446e-06	6.8057e-10	1.08145e-05	0	0	0	0	0	0	0	0	0	0	0	0	0	0	0	0	0	1	0	0	0	0	0	0	2	1	0	0	95	82	0	0	0	0	1	1	0	0	0	0	1	1	3.19405
MATN4	MATN4	20	1.02	2.13378e-06	6.8057e-10	1.60074e-05	0	0	0	0	0	0	0	0	0	0	0	0	0	0	0	0	0	1	0	0	0	0	0	0	4	3	0	0	92	73	0	1	0	0	6	12	0	0	0	0	1	1	3.18852
HMGCS1	HMGCS1	5	0.207	1.78036e-06	3.56283e-06	3.22233e-06	0	0	0	0	0	0	0	0	0	0	0	0	0	0	0	0	0	0	0	0	0	0	0	0	0	0	14	5	13	15	0	0	2	4	1	2	0	0	0	0	1	3.18753	1
KIAA1551	RESF1	12	0.408	4.81613e-06	6.8057e-10	1.76072e-09	1	0	0	0	0	0	0	0	0	0	0	0	0	0	0	0	0	0	0	0	0	0	0	0	2	0	0	0	0	0	0	0	0	0	0	0	0	0	0	0	3.18753	1	1
B3GALT6	B3GALT6	1	1.425	3.88232e-07	4.7507e-06	1.17804e-05	0	0	0	0	0	0	0	0	0	0	0	0	0	0	0	0	0	0	0	0	0	0	0	0	9	3	36	32	65	72	0	0	0	0	0	0	0	0	0	0	1	2.85707	1.11498
SENP5	SENP5	3	0.191	2.72171e-06	3.00921e-06	1.41843e-07	0	0	0	0	0	0	0	0	0	0	0	0	0	0	0	0	0	0	0	0	0	0	0	0	1	0	4	4	1	1	0	3	3	1	0	0	0	0	0	0	1	3.17026	1.00449
DNAH11	DNAH11	7	0.674	2.08906e-05	5.15165e-06	2.18564e-05	0	0	0	0	0	0	0	0	0	0	0	0	0	0	0	0	0	0	0	0	0	0	0	0	63	50	0	0	0	0	4	8	0	0	0	0	0	0	0	0	3.18405	1	1
XKR3	XKR3	22	0.93	6.99145e-07	3.70634e-06	1.4271e-06	0	0	0	0	0	0	1	0	0	0	0	0	0	0	0	0	0	0	0	0	0	0	0	0	4	5	43	40	17	18	0	1	0	0	0	0	0	0	0	0	1.10822	2.67938	1.07048
CLASP1	CLASP1	2	0.176	9.41718e-06	2.27594e-06	1.81532e-05	0	0	0	0	2	0	0	0	0	0	0	1	0	0	0	0	0	0	0	0	0	0	1	0	0	1	6	5	74	61	1	0	0	1	10	17	0	0	0	0	1	1	3.17862
BRINP1	BRINP1	9	0.284	2.72338e-06	6.8057e-10	1.30865e-05	0	0	0	0	0	0	0	0	0	0	0	0	0	0	0	0	0	0	0	0	0	0	0	0	0	0	0	0	93	106	2	0	0	0	8	18	0	0	0	0	2.82973	1	1.12271
ZNF71	ZNF71	19	1.219	1.5777e-06	6.8057e-10	1.11628e-05	0	0	0	0	0	0	0	0	0	0	2	0	0	0	0	0	0	0	0	0	0	0	1	0	0	0	0	0	21	15	0	0	0	0	3	9	0	0	0	0	1	1	3.17588
COBL	COBL	7	0.469	4.04127e-06	6.8057e-10	1.76072e-09	0	0	0	0	0	0	0	0	0	0	0	0	0	0	0	0	0	0	0	0	0	0	0	0	1	1	0	0	0	0	3	0	0	0	0	0	0	0	0	0	3.1739	1	1
LZTS1	LZTS1	8	0.34	1.33886e-06	6.8057e-10	8.59506e-06	0	0	0	0	1	0	0	0	0	0	0	0	0	0	0	0	0	0	0	0	0	0	1	0	0	0	0	0	105	85	0	0	0	0	8	14	0	0	0	0	1	1	3.17216
HIST2H2AC	H2AC20	1	1.589	1.90816e-07	2.80761e-06	2.54878e-06	0	0	0	0	1	0	0	0	0	0	0	0	0	0	0	0	0	0	0	0	0	0	0	0	0	0	0	0	0	0	1	0	3	2	2	4	0	0	0	0	1	2.3142	1.37055
SYNJ1	SYNJ1	21	0.33	8.03715e-06	3.2515e-07	1.5433e-05	0	0	0	0	0	0	0	0	0	0	1	0	0	0	0	0	0	0	0	0	0	0	0	0	3	3	2	0	75	59	0	1	0	0	12	19	0	0	0	0	1	1.57228	2.01448
PTPN1	PTPN1	20	0.382	2.7738e-06	9.85324e-07	5.69347e-06	0	0	0	0	0	0	0	0	0	0	0	0	0	0	0	0	0	0	0	0	0	0	0	0	1	0	1	1	50	34	0	0	1	0	2	4	0	0	0	0	1.03696	1.71653	1.77719
NRBP1	NRBP1	2	0.135	3.1026e-06	3.98714e-06	4.54956e-06	0	0	0	0	0	0	0	0	0	0	0	0	0	0	0	0	0	0	0	0	0	0	0	0	0	0	4	1	14	7	0	0	1	0	5	4	0	0	0	0	1	2.39885	1.31861
DHX57	DHX57	2	0.675	7.0412e-06	6.8057e-10	1.76072e-09	1	0	0	0	0	0	0	0	0	0	0	0	0	0	0	0	0	0	1	0	0	0	0	0	30	17	0	0	0	0	0	5	0	0	0	0	0	0	0	0	3.15999	1	1
ALAS1	ALAS1	3	0.49	2.5192e-06	6.8057e-10	6.40165e-07	0	0	0	0	0	0	0	0	0	0	0	0	0	0	0	0	0	0	0	0	0	0	0	0	18	12	0	0	1	1	0	0	0	0	0	1	0	0	0	0	3.15586	1	1
DCST1	DCST1	1	1.113	3.7056e-06	1.14651e-06	2.59874e-06	0	0	0	0	0	0	0	0	0	0	0	0	0	0	0	0	0	0	0	0	0	0	0	0	11	17	4	2	9	9	2	2	1	0	3	0	0	0	0	0	1.02493	2.73756	1.12475
PPIL2	PPIL2	22	0.548	2.82924e-06	6.8057e-10	6.86596e-06	0	0	0	0	0	0	0	0	0	0	0	0	0	0	0	0	0	0	0	0	0	0	0	0	8	6	0	0	33	32	3	2	0	0	5	12	0	0	0	0	2.80809	1	1.12362
SPATS2L	SPATS2L	2	0.434	1.8435e-06	6.8057e-10	3.33701e-06	0	0	0	0	0	0	0	0	0	0	0	0	0	0	0	0	0	0	0	0	0	0	0	0	10	5	0	0	13	7	1	1	0	0	0	3	0	0	0	0	2.82081	1	1.11827
ZDHHC14	ZDHHC14	6	0.423	2.03345e-06	3.19887e-06	5.80345e-06	0	0	0	0	0	0	1	0	0	0	0	0	0	0	0	0	0	0	0	0	0	0	0	0	0	1	6	7	17	13	0	0	0	1	3	6	0	0	0	0	2.81455	1	1.12059
FAM49B	FAM49B	8	0.31	2.00095e-06	2.58172e-06	3.2247e-06	0	0	0	0	0	0	0	0	0	0	0	0	0	0	0	0	0	0	0	0	0	0	0	0	0	0	0	0	6	6	0	0	2	0	0	1	0	0	0	0	1	3.15332	1
RBFOX2	RBFOX2	22	0.194	2.02357e-06	4.85252e-06	4.52389e-06	0	0	1	0	0	0	0	0	0	0	0	1	0	0	0	0	0	0	0	0	0	0	0	0	0	0	11	5	20	19	0	1	3	7	3	1	0	0	0	0	1	2.67724	1.1767
SEMA3E	SEMA3E	7	0.679	4.2272e-06	6.8057e-10	1.76072e-09	0	0	0	0	0	0	0	0	0	0	0	0	0	0	0	0	0	0	0	0	0	0	0	0	3	0	0	0	0	0	4	2	0	0	0	0	0	0	0	0	3.1502	1	1
MAPK6	MAPK6	15	0.407	2.06846e-06	6.18925e-07	4.12518e-06	0	0	0	0	1	0	0	0	0	0	0	1	0	0	0	0	0	0	0	0	0	0	0	0	3	1	0	0	10	10	0	0	1	0	3	4	0	0	0	0	1.33099	1.84801	1.27785
TECPR2	TECPR2	14	0.346	4.28197e-06	6.8057e-10	1.08994e-05	0	0	0	0	0	0	0	1	0	0	0	0	0	0	0	0	0	0	0	0	0	0	0	0	0	0	0	0	48	47	2	0	0	0	6	9	0	0	0	0	2.51347	1	1.25041
DOCK3	DOCK3	3	0.158	1.04493e-05	6.8057e-10	3.38091e-05	0	0	0	0	2	0	0	0	0	0	1	0	0	0	0	0	0	0	0	0	0	0	0	0	2	2	0	0	159	132	1	0	0	0	16	30	0	0	0	0	1	1	3.14148
IRF8	IRF8	16	0.344	2.02876e-06	1.02686e-07	9.45388e-06	0	0	0	0	1	0	0	0	0	0	0	0	0	0	0	0	0	0	0	0	0	0	0	0	0	0	1	0	52	49	1	0	0	0	9	7	0	0	0	0	1.59512	1.25887	1.56372
ADAMTS18	ADAMTS18	16	0.928	8.19176e-06	6.8057e-10	1.76072e-09	0	0	0	0	0	0	0	0	0	0	0	0	0	0	0	0	0	0	0	0	0	0	0	0	19	18	0	0	0	0	10	6	0	0	0	0	0	0	0	0	3.13852	1	1
PRDM6	PRDM6	5	0.424	2.48553e-06	6.3867e-07	2.70962e-06	0	0	0	0	0	0	1	0	0	0	0	0	0	0	0	0	0	0	0	0	0	0	0	0	1	1	0	0	0	0	0	0	0	0	0	0	0	0	0	0	3.13501	1	1
FLT1	FLT1	13	0.246	5.87724e-06	6.8057e-10	8.06826e-06	0	0	0	0	0	0	0	0	0	0	1	0	0	0	0	0	0	0	0	0	0	0	0	0	4	1	0	0	31	24	1	0	0	0	13	6	0	0	0	0	1.76755	1	1.77301
OSBPL7	OSBPL7	17	0.444	4.7642e-06	6.8057e-10	1.47946e-05	0	0	0	0	0	0	1	0	0	0	1	0	0	0	0	0	0	0	0	0	0	0	0	0	1	2	0	0	69	65	1	1	0	0	15	15	0	0	0	0	1.75591	1	1.78418
EML1	EML1	14	0.28	4.84678e-06	1.34842e-07	1.49684e-05	0	0	0	0	0	0	0	0	0	0	0	1	0	0	0	0	0	0	0	0	0	0	1	0	5	4	0	0	45	57	2	1	1	0	4	9	0	0	0	0	1.64604	1.90187	1
SIMC1	SIMC1	5	0.913	1.91034e-06	1.78318e-06	2.75335e-06	0	0	1	0	0	0	0	0	0	0	0	0	0	0	0	0	0	0	0	0	0	0	0	0	2	4	1	1	8	4	3	5	0	2	1	1	0	0	0	0	1.02242	2.74126	1.11669
OBSL1	OBSL1	2	0.878	6.86247e-06	3.52729e-06	7.52613e-06	0	0	0	0	0	0	0	0	0	0	0	0	0	0	0	0	0	0	0	0	0	0	0	0	32	41	14	13	24	23	8	5	0	0	0	0	0	0	0	0	2.44421	1.18878	1.07673
GYS1	GYS1	19	0.527	4.05919e-06	6.8057e-10	1.62157e-05	1	0	0	0	0	0	0	0	0	0	0	0	0	0	0	0	0	0	0	0	0	0	0	0	8	6	0	0	94	91	1	2	0	0	7	23	0	0	0	0	2.30714	1	1.35436
KLHL21	KLHL21	1	1.127	1.2496e-06	7.04943e-06	1.03145e-05	0	1	0	0	0	0	0	0	0	0	0	0	0	0	0	0	0	0	0	0	0	0	0	0	3	3	20	14	37	44	0	0	0	0	0	1	0	0	0	0	1.00088	3.12175	1
KIAA0947	ICE1	5	0.164	6.80854e-06	6.8057e-10	1.76072e-09	0	0	0	0	0	0	1	1	0	0	0	0	0	0	0	0	0	0	0	0	0	0	0	0	7	4	0	0	0	0	2	0	0	0	0	0	0	0	0	0	3.1203	1	1
KIAA1429	VIRMA	8	0.283	7.50366e-06	2.11001e-06	1.26789e-05	0	0	0	0	0	0	1	1	0	0	0	1	0	0	0	0	0	0	0	0	0	0	0	0	8	1	2	4	46	44	1	1	0	0	11	13	0	0	0	0	2.27375	1	1.37223
SMOC1	SMOC1	14	0.592	2.18588e-06	6.8057e-10	4.98159e-06	0	0	0	0	0	0	0	1	0	0	0	0	0	0	0	0	0	0	0	0	0	0	0	0	6	0	0	0	22	12	1	1	0	0	3	8	0	0	0	0	2.41124	1	1.29377
QARS	QARS1	3	0.806	4.30006e-06	6.8057e-10	1.16673e-05	0	0	0	0	0	0	0	0	0	0	0	0	0	0	0	0	0	0	0	0	0	0	0	0	9	11	0	0	87	47	0	3	0	0	5	17	0	0	0	0	1	1	3.11569
POLD3	POLD3	11	0.236	2.68385e-06	6.8057e-10	1.76072e-09	0	0	0	0	0	0	0	0	0	0	0	0	0	0	0	0	0	0	1	0	0	0	0	0	1	4	0	0	0	0	0	0	0	0	0	0	0	0	0	0	3.11281	1	1
CSNK1G3	CSNK1G3	5	0.206	2.98736e-06	6.8057e-10	5.05029e-06	0	1	0	0	0	0	0	0	0	0	0	0	0	0	0	0	0	0	0	0	0	0	0	0	4	0	0	0	7	13	1	0	0	0	1	3	1	0	0	0	3.11041	1	1
TBC1D14	TBC1D14	4	0.457	3.89404e-06	6.8057e-10	5.19522e-06	0	0	0	0	0	0	0	0	0	0	0	1	0	0	0	0	0	0	0	0	0	0	0	0	1	3	0	0	27	24	3	0	0	0	4	1	0	0	0	0	2.36644	1	1.31392
EDEM2	EDEM2	20	0.777	2.66174e-06	6.8057e-10	7.16113e-06	0	0	0	0	0	1	0	0	0	0	1	0	0	0	0	0	0	0	0	0	0	0	0	0	12	7	0	0	45	27	1	1	0	0	4	9	0	0	0	0	1.75741	1	1.76784
C22orf42	C22orf42	22	1.785	1.35765e-06	1.54736e-06	1.79707e-07	0	0	0	0	0	0	0	0	0	0	0	0	0	0	0	0	0	0	0	0	0	0	0	0	4	2	2	0	1	0	1	0	2	1	0	0	0	0	0	0	1	3.02916	1.02551
SORCS1	SORCS1	10	0.338	6.19197e-06	1.30493e-06	7.80288e-06	0	0	0	0	0	0	0	0	0	0	0	0	0	0	0	0	0	0	0	0	0	0	0	0	7	2	2	4	69	74	1	0	0	0	2	6	0	0	0	0	2.57501	1	1.20569
CADM1	CADM1	11	0.436	1.83546e-06	2.86551e-07	8.33014e-06	0	0	0	0	1	0	0	0	0	0	0	0	0	0	0	0	0	0	0	0	0	0	0	0	2	0	1	0	20	24	2	1	0	0	6	7	0	0	0	0	2.46927	1.24369	1.01028
PER3	PER3	1	0.841	4.68313e-06	6.8057e-10	1.76072e-09	0	0	0	0	0	0	0	0	0	0	0	0	0	0	0	0	0	0	0	0	0	0	0	0	8	3	0	0	0	0	7	6	0	0	0	0	0	0	0	0	3.1023	1	1
DNAJC8	DNAJC8	1	0.587	1.98136e-06	3.76816e-07	3.29587e-06	0	0	0	0	0	0	1	0	0	0	0	0	0	0	0	0	0	0	0	0	0	0	0	0	2	1	0	0	7	3	0	0	0	0	5	3	0	0	0	0	2.53102	1	1.22562
DCAF15	DCAF15	19	0.272	2.35086e-06	4.70608e-06	5.08884e-06	0	0	0	0	0	0	0	0	0	0	0	0	0	0	0	0	0	0	0	0	0	0	0	0	0	0	15	14	9	7	0	1	2	0	1	6	0	0	0	0	1	3.09713	1
NUP133	NUP133	1	0.448	5.86635e-06	6.8057e-10	1.76072e-09	0	0	0	0	0	0	0	0	0	0	0	0	0	0	0	0	0	0	0	0	0	0	0	0	10	4	0	0	0	0	1	0	0	0	0	0	0	0	0	0	3.09516	1	1
EHD4	EHD4	15	0.787	2.18186e-06	6.8057e-10	1.138e-05	0	0	0	0	0	0	0	0	0	0	1	0	0	0	0	0	0	0	0	0	0	0	0	0	7	6	0	0	74	48	1	1	0	0	5	7	0	0	0	0	1.25047	1	2.47455
MLF2	MLF2	12	0.413	1.64788e-06	2.26992e-06	3.41419e-06	0	0	0	0	0	1	0	0	0	0	0	0	0	0	0	0	0	0	0	0	0	0	0	0	0	0	8	3	12	14	0	0	1	1	1	0	0	0	0	0	1	3.05503	1.01226
ULK1	ULK1	12	0.288	4.15434e-06	6.3995e-06	3.00382e-06	0	0	0	0	0	0	2	1	0	0	0	0	0	0	0	0	0	0	0	0	0	0	0	0	0	3	14	18	9	7	0	0	0	4	0	0	0	0	0	0	2.91125	1	1.06159
LY75	LY75	2	0.926	8.52072e-06	6.8057e-10	1.76072e-09	0	0	0	0	0	0	0	0	0	0	0	0	0	0	0	0	0	0	0	0	0	0	0	0	62	41	0	0	0	0	0	0	0	0	0	0	0	0	0	0	3.08952	1	1
ISL2	ISL2	15	0.67	9.76542e-07	1.23778e-06	9.10287e-06	1	0	0	0	0	0	0	0	0	0	0	0	0	0	0	0	0	0	0	0	0	0	0	0	2	0	4	3	26	26	0	0	0	0	3	7	0	0	0	0	2.49879	1.21438	1.01776
CDC73	CDC73	1	0.188	4.39671e-06	4.6173e-06	6.97203e-06	1	0	0	0	0	0	0	0	1	0	0	0	0	0	0	0	0	0	0	0	0	0	0	0	0	1	9	6	13	8	0	0	1	5	5	8	0	0	0	0	2.71015	1	1.13891
NOM1	NOM1	7	0.903	2.46342e-06	9.16375e-07	7.42962e-06	0	0	0	0	0	0	0	0	0	0	0	0	0	0	0	0	0	0	0	0	0	0	0	0	22	5	9	11	43	40	2	3	0	0	1	1	0	0	0	0	2.43965	1	1.26517
CACNG4	CACNG4	17	0.825	1.33878e-06	1.87115e-06	7.24306e-06	0	0	0	0	0	0	0	0	0	0	0	0	0	0	0	0	0	0	0	0	0	0	0	0	2	1	6	2	25	34	1	0	0	0	3	4	0	0	0	0	1.31827	2.34065	1
ITGA10	ITGA10	1	0.785	6.87487e-06	6.8057e-10	1.76072e-09	0	0	0	0	0	0	0	0	0	0	0	0	0	0	0	0	0	0	0	0	0	0	0	0	43	30	0	0	0	0	2	5	0	0	0	0	0	0	0	0	3.08369	1	1
FARP2	FARP2	2	1.183	5.08513e-06	6.8057e-10	1.76072e-09	1	0	0	0	0	0	2	0	0	0	0	0	0	0	0	0	0	0	0	0	0	0	0	0	17	20	0	0	0	0	2	5	0	0	0	0	0	0	0	0	3.08007	1	1
TERF2IP	TERF2IP	16	1.143	1.12716e-06	1.11907e-06	5.61175e-06	0	0	0	0	0	0	0	0	0	0	0	0	0	0	0	0	0	0	0	0	0	0	0	0	2	3	2	0	21	18	0	3	1	0	1	0	0	0	0	0	1	2.6766	1.1496
RBL1	RBL1	20	0.711	4.97542e-06	6.8057e-10	2.33061e-06	0	0	0	0	0	0	0	0	0	0	0	0	0	0	0	0	0	0	0	0	0	0	1	1	29	23	0	0	3	4	3	4	0	0	3	2	0	0	0	0	2.97258	1	1.03418
GFPT2	GFPT2	5	0.74	3.77528e-06	6.8057e-10	9.196e-06	0	0	0	0	0	0	0	0	0	0	0	0	0	0	0	0	0	0	0	0	0	0	0	0	10	5	0	0	38	38	3	2	0	0	4	7	0	0	0	0	2.70789	1	1.13525
ROR1	ROR1	1	0.267	2.75889e-06	6.8057e-10	1.27899e-05	0	0	0	0	0	0	0	0	0	0	0	0	0	0	0	0	0	1	0	0	0	0	0	0	2	1	0	0	58	44	0	0	0	0	8	6	0	0	0	0	1.05536	1	2.90951
SEMA5A	SEMA5A	5	0.483	4.88363e-06	6.8057e-10	1.58108e-05	0	0	0	0	0	0	0	0	0	0	0	0	0	0	0	0	0	0	0	0	0	0	0	0	1	2	0	0	85	94	3	0	0	0	9	13	0	0	0	0	2.48519	1	1.23544
SEZ6	SEZ6	17	0.587	4.15467e-06	6.8057e-10	5.66291e-06	0	0	0	0	0	0	0	0	0	0	0	0	0	0	0	0	0	0	0	0	0	0	0	0	5	5	0	0	22	15	3	1	0	0	4	3	0	0	0	0	2.29869	1	1.33558
NDRG3	NDRG3	20	0.446	2.3646e-06	6.8057e-10	1.65961e-06	0	0	0	0	0	0	0	0	0	0	0	0	0	0	0	0	0	0	0	0	0	0	0	0	2	1	0	0	7	2	2	0	0	0	1	3	0	0	0	0	2.73776	1	1.12106
NCAPG	NCAPG	4	0.606	3.53257e-06	6.8057e-10	1.76072e-09	0	0	0	0	0	0	1	0	0	0	0	0	0	0	0	0	0	0	0	0	0	0	0	0	6	2	0	0	0	0	0	0	0	0	0	0	0	0	0	0	3.06729	1	1
COL13A1	COL13A1	10	0.753	4.27728e-06	1.6247e-06	1.89634e-06	0	0	0	0	0	0	0	0	0	0	1	0	0	0	0	0	0	0	1	0	0	0	0	0	18	20	10	11	2	2	2	1	0	0	0	0	0	0	0	0	2.17779	1	1.40837
MALRD1	MALRD1	10	0.854	5.21629e-06	1.61999e-06	6.87296e-06	0	0	0	0	0	0	0	0	0	0	0	0	0	0	0	0	0	0	0	0	0	0	0	0	57	47	0	0	0	0	0	0	0	0	0	0	0	0	0	0	3.06411	1	1
RLF	RLF	1	0.04	6.72596e-06	6.8057e-10	1.76463e-05	0	0	0	0	0	0	1	0	0	0	1	0	0	0	0	0	0	0	0	0	0	0	0	0	0	0	0	0	41	41	0	0	0	0	7	11	0	0	0	0	2.90815	1	1.05342
FGD3	FGD3	9	0.733	2.3842e-06	8.52103e-07	6.24832e-06	0	0	0	0	0	0	0	0	0	0	0	0	0	0	0	0	0	0	0	0	0	0	0	0	2	4	4	1	30	24	1	0	0	0	6	3	0	0	0	0	1.07622	1.94978	1.45958
PPP1R3D	PPP1R3D	20	1.527	5.58814e-07	1.50868e-06	7.79707e-06	0	0	0	0	0	0	0	0	0	0	1	0	0	0	0	0	0	0	0	0	0	0	0	0	5	7	16	14	19	21	0	1	1	0	0	3	0	0	0	0	1	3.05703	1
CRBN	CRBN	3	0.644	2.37331e-06	6.8057e-10	1.76072e-09	1	0	0	0	0	0	0	0	0	0	0	0	0	0	0	0	0	0	0	0	0	0	0	0	6	5	0	0	0	0	1	0	0	0	0	0	0	0	0	0	3.05372	1	1
STAG3	STAG3	7	0.606	6.34121e-06	6.8057e-10	9.50632e-06	0	1	0	0	0	0	0	0	0	0	0	0	0	0	0	0	0	0	0	0	0	0	0	0	14	5	0	0	16	18	1	1	0	0	7	8	0	0	0	0	2.97008	1	1.02806
PPP6R1	PPP6R1	19	0.304	3.37797e-06	7.86074e-07	2.94978e-06	0	0	0	0	0	0	0	0	0	0	0	0	0	0	0	0	0	0	0	0	0	0	0	0	1	2	8	2	11	10	0	0	1	2	1	1	0	0	0	0	1	2.86737	1.06462
PPFIA4	PPFIA4	1	0.637	3.14867e-06	6.8057e-10	1.11593e-05	0	1	0	0	0	0	0	0	0	0	0	0	0	0	0	0	0	0	0	0	0	0	0	0	12	11	0	0	42	36	2	0	0	0	4	11	0	0	0	0	2.52344	1	1.20857
TLE6	TLE6	19	0.685	2.66777e-06	6.8057e-10	1.76072e-09	0	0	0	0	0	0	0	0	0	0	0	0	0	0	0	0	0	0	0	0	0	0	0	0	9	6	0	0	0	0	5	5	0	0	0	0	0	0	0	0	3.04926	1	1
PCDHGB1	PCDHGB1	5	0.72	2.28604e-06	6.8057e-10	1.30618e-05	0	0	0	0	0	0	0	0	0	0	0	0	0	0	0	0	0	0	0	0	0	0	0	0	20	16	0	0	68	63	0	0	0	0	7	6	0	0	0	0	1.89081	1	1.61265
RCHY1	RCHY1	4	0.636	1.30766e-06	6.8057e-10	3.68485e-06	0	0	0	0	0	0	0	0	0	0	0	0	0	0	0	1	0	0	0	0	0	0	0	0	1	1	0	0	19	11	0	0	0	0	2	3	0	0	0	0	2.36162	1	1.29093
TACC1	TACC1	8	0.591	3.21717e-06	6.8057e-10	1.76072e-09	1	0	0	0	0	0	0	0	0	0	0	0	0	0	0	0	0	0	0	0	0	0	0	0	1	1	0	0	0	0	2	1	0	0	0	0	0	0	0	0	3.04508	1	1
SCAF11	SCAF11	12	0.193	5.5734e-06	1.02953e-06	4.25433e-07	0	0	0	0	0	0	0	1	0	0	0	0	0	0	0	1	0	0	0	0	0	0	0	0	4	1	2	2	1	2	1	4	0	0	0	1	0	0	0	0	3.04352	1	1
GPR26	GPR26	10	0.593	1.20567e-06	5.03122e-06	6.15246e-06	0	0	0	0	0	0	1	0	0	0	0	0	0	0	0	0	0	0	0	0	0	0	0	0	1	0	6	6	19	20	0	0	0	0	6	6	0	0	0	0	2.70315	1	1.125
MAPK10	MAPK10	4	0.466	1.90414e-06	3.07309e-06	2.91864e-06	0	0	0	0	0	0	0	0	0	0	0	0	0	0	0	0	0	0	0	0	0	0	0	0	1	0	5	6	13	20	0	1	4	2	1	1	0	0	0	0	1	3.04105	1
TUSC3	TUSC3	8	0.926	1.89308e-06	6.8057e-10	1.38145e-06	0	0	0	0	0	0	0	0	0	0	0	0	0	0	0	0	0	0	0	0	0	0	0	0	5	2	0	0	2	0	6	0	0	0	2	1	0	0	0	0	2.78527	1	1.09048
ZC3HAV1	ZC3HAV1	7	0.59	3.21918e-06	2.96118e-06	6.1245e-06	0	0	0	0	0	0	0	0	0	0	0	0	0	0	0	0	0	0	0	0	0	0	0	0	0	0	10	8	30	27	0	1	1	0	5	5	0	0	0	0	1	2.3572	1.28828
RBM47	RBM47	4	0.292	1.98153e-06	8.0573e-06	8.61737e-06	0	0	0	0	0	0	0	0	0	0	0	0	0	0	0	0	0	0	0	0	0	0	0	0	1	1	17	13	41	35	0	0	5	5	0	9	0	0	0	0	1	2.70157	1.12357
CERS2	CERS2	1	0.426	2.81618e-06	1.72381e-07	6.67941e-06	0	1	0	0	0	0	0	0	0	0	0	0	0	0	0	0	0	0	0	0	0	0	0	0	0	0	0	0	19	20	2	0	0	0	6	1	0	0	0	0	2.53164	1	1.19894
PWWP2A	PWWP2A	5	0.297	2.24684e-06	1.80743e-06	1.02003e-05	0	0	0	0	0	0	0	0	0	0	0	0	0	0	0	0	0	0	0	0	0	0	0	0	0	0	5	0	27	27	0	0	0	0	2	2	0	0	0	0	1	2.90277	1.04489
NPAT	NPAT	11	0.367	4.61278e-06	6.8057e-10	1.76072e-09	0	0	0	0	0	0	0	0	0	0	0	0	0	0	0	0	0	0	1	0	0	0	0	0	2	2	0	0	0	0	1	1	0	0	0	0	0	0	0	0	3.03291	1	1
WNT9B	WNT9B	17	0.581	7.67385e-07	6.8057e-10	2.38971e-06	0	0	0	0	0	0	0	0	0	0	0	0	0	0	0	0	0	0	1	0	0	0	0	0	1	2	0	0	18	10	0	0	0	0	1	3	0	0	0	0	2.38816	1	1.26614
DENND5A	DENND5A	11	0.376	5.83821e-06	6.8057e-10	1.51439e-05	0	0	0	0	2	0	0	0	0	0	0	0	0	0	0	0	0	0	0	0	0	0	0	0	3	4	0	0	47	45	0	2	0	0	12	14	0	0	0	0	1	1	3.02273
COL12A1	COL12A1	6	0.282	1.437e-05	6.8057e-10	1.75138e-05	0	0	0	0	0	0	1	0	0	0	0	0	0	0	0	1	0	0	0	0	0	0	0	0	2	3	0	0	118	159	0	0	0	0	8	14	0	0	0	0	3.02236	1	1
GAS7	AC005747.1	17	0.362	2.75437e-06	2.78732e-06	7.0476e-06	0	0	0	0	1	0	0	0	0	0	0	0	0	0	0	0	0	0	0	0	0	0	0	0	0	0	3	1	29	20	1	0	1	1	5	7	0	0	0	0	1.53169	1.37024	1.43946
SLC16A9	SLC16A9	10	0.685	1.50809e-06	6.8057e-10	1.76072e-09	0	0	0	0	0	0	0	0	0	0	0	0	0	0	0	0	0	0	0	0	0	0	0	0	2	1	0	0	0	0	3	0	0	0	0	0	0	0	0	0	3.02017	1	1
ARHGAP30	ARHGAP30	1	0.209	3.87243e-06	6.9963e-08	7.24619e-06	1	0	0	0	0	0	0	0	0	0	0	0	0	0	0	0	0	0	0	0	0	0	0	0	0	1	0	0	25	21	0	0	0	0	2	13	0	0	0	0	3.00265	1	1.00553
UBA7	UBA7	3	0.892	4.121e-06	6.8057e-10	8.65155e-07	1	0	0	0	0	0	0	0	0	0	0	0	0	0	0	0	0	0	0	0	0	0	0	0	45	27	0	0	3	4	1	2	0	0	0	1	0	0	0	0	3.01323	1	1
GBF1	GBF1	10	0.551	1.00379e-05	6.8057e-10	1.64763e-05	0	0	0	0	1	0	1	0	0	0	0	0	0	0	0	0	0	0	0	0	0	0	1	0	15	10	0	0	79	61	2	5	0	0	23	29	0	0	0	0	1.12581	1	2.67527
HNRNPA2B1	HNRNPA2B1	7	0.218	1.675e-06	1.1612e-06	6.04822e-06	0	0	0	0	0	0	0	0	0	0	0	0	0	0	0	0	0	0	0	0	0	0	0	0	1	0	1	0	20	20	0	0	2	1	3	4	0	0	1	0	1.11495	2.50854	1.07576
AVPR1A	AVPR1A	12	1.292	1.15486e-06	5.02224e-07	8.47612e-06	0	0	0	0	0	0	0	0	0	0	0	0	0	0	0	0	0	0	0	0	0	0	0	0	7	8	5	3	36	40	0	1	1	0	3	9	0	0	0	0	1	3.00662	1
ZFYVE9	ZFYVE9	1	0.325	4.45349e-06	5.08447e-07	6.59933e-06	0	0	0	0	0	0	1	0	0	0	0	0	0	0	0	0	0	0	0	0	0	0	0	0	0	2	0	0	34	20	0	0	0	0	7	12	0	0	0	0	1.87536	1	1.6027
ACTR5	ACTR5	20	1.006	2.12909e-06	2.86324e-06	2.37842e-06	0	0	0	0	0	0	1	0	0	0	0	0	0	0	0	0	0	0	0	0	0	0	0	0	5	7	13	8	4	7	0	0	0	0	0	0	0	0	0	0	1	3.00364	1
PNPLA7	PNPLA7	9	1.078	5.97406e-06	6.8057e-10	1.76072e-09	2	0	0	0	0	0	0	0	0	0	0	0	0	0	0	0	0	0	1	0	0	0	0	0	53	46	0	0	0	0	0	4	0	0	0	0	0	0	0	0	3.00277	1	1
KIF21B	KIF21B	1	0.428	8.6827e-06	6.8057e-10	3.63938e-05	0	0	0	0	0	1	1	0	0	0	1	0	0	0	0	0	0	0	0	0	0	0	0	0	2	2	0	0	155	142	1	3	0	0	28	45	0	0	0	0	1	1	3.00175
NEBL	NEBL	10	1.139	5.95077e-06	1.08988e-06	1.27524e-07	1	0	0	0	0	0	0	0	0	0	0	0	0	0	0	0	0	0	0	0	0	0	0	0	27	29	3	1	0	0	6	1	1	0	0	0	0	0	0	0	1.10266	2.72151	1
SLC30A1	SLC30A1	1	0.234	1.01959e-06	1.24789e-07	8.3022e-06	0	0	0	0	0	0	0	0	0	0	0	0	0	0	0	0	0	0	0	0	0	0	0	0	5	0	0	1	15	10	0	0	0	0	2	4	0	0	0	0	2.78178	1	1.07875
SLC2A13	SLC2A13	12	0.377	2.37381e-06	2.20208e-06	5.13949e-06	0	0	0	0	0	0	0	0	0	0	0	0	0	0	0	0	0	0	0	0	0	0	0	0	0	4	4	1	5	8	0	0	1	0	0	0	0	0	0	0	1	3.00044	1
EZR	EZR	6	0.44	2.63293e-06	6.8057e-10	5.73227e-06	0	0	0	0	0	0	0	0	0	0	0	0	0	0	0	0	0	0	1	0	0	0	0	0	2	0	0	0	23	31	0	1	0	0	6	6	0	0	0	0	2.9924	1	1.00172
TECPR1	TECPR1	7	0.504	5.39936e-06	6.8057e-10	2.24288e-06	0	0	0	0	0	0	0	0	0	0	0	0	0	0	0	0	0	0	0	0	0	0	0	0	11	2	0	0	22	13	0	1	0	0	0	0	0	0	0	0	2.21784	1	1.35147
EIF2S1	EIF2S1	14	0.31	1.48428e-06	2.84224e-06	3.06717e-06	0	0	0	0	0	0	0	0	0	0	0	0	0	0	0	0	0	0	0	0	0	0	0	0	1	0	1	0	16	8	0	0	2	1	4	6	0	0	0	0	1.12337	2.0319	1.31215
TRA2A	TRA2A	7	0.591	3.50996e-06	1.72821e-06	3.87111e-06	1	0	0	0	0	0	0	0	0	0	0	0	0	0	0	0	0	0	0	0	0	0	0	0	3	4	2	4	12	8	2	1	0	2	0	0	0	0	0	0	2.68183	1	1.11601
KCNMB4	KCNMB4	12	0.338	6.33033e-07	2.35422e-06	3.11104e-06	0	0	0	0	0	0	0	0	0	0	0	0	0	0	0	0	0	0	0	0	0	0	0	0	1	0	10	3	10	11	0	0	0	1	0	1	0	0	0	0	1.18029	2.5329	1
PLEKHA1	PLEKHA1	10	0.728	2.01804e-06	6.8057e-10	5.32275e-06	0	0	0	0	0	0	0	0	0	0	0	0	0	0	0	0	0	0	0	0	0	0	0	1	16	10	0	0	29	32	1	0	0	0	6	10	0	0	0	0	2.71605	1	1.09952
[truncated: 16,130 more rows]
[truncated: 5 more columns]
